# Supplementary material for: Deconvolving metabolic intratumoral heterogeneity in clear cell renal carcinoma with hyperpolarized 13C-pyruvate MRI
Source: Research Square preprint supplement (doi:10.21203/rs.3.rs-7989219/v1), 2026-01-29
Supplement: Supplementary file 1 [file 24b7db158c61ebc2e44d44ae.docx]

### Supplemental figures and legends

**
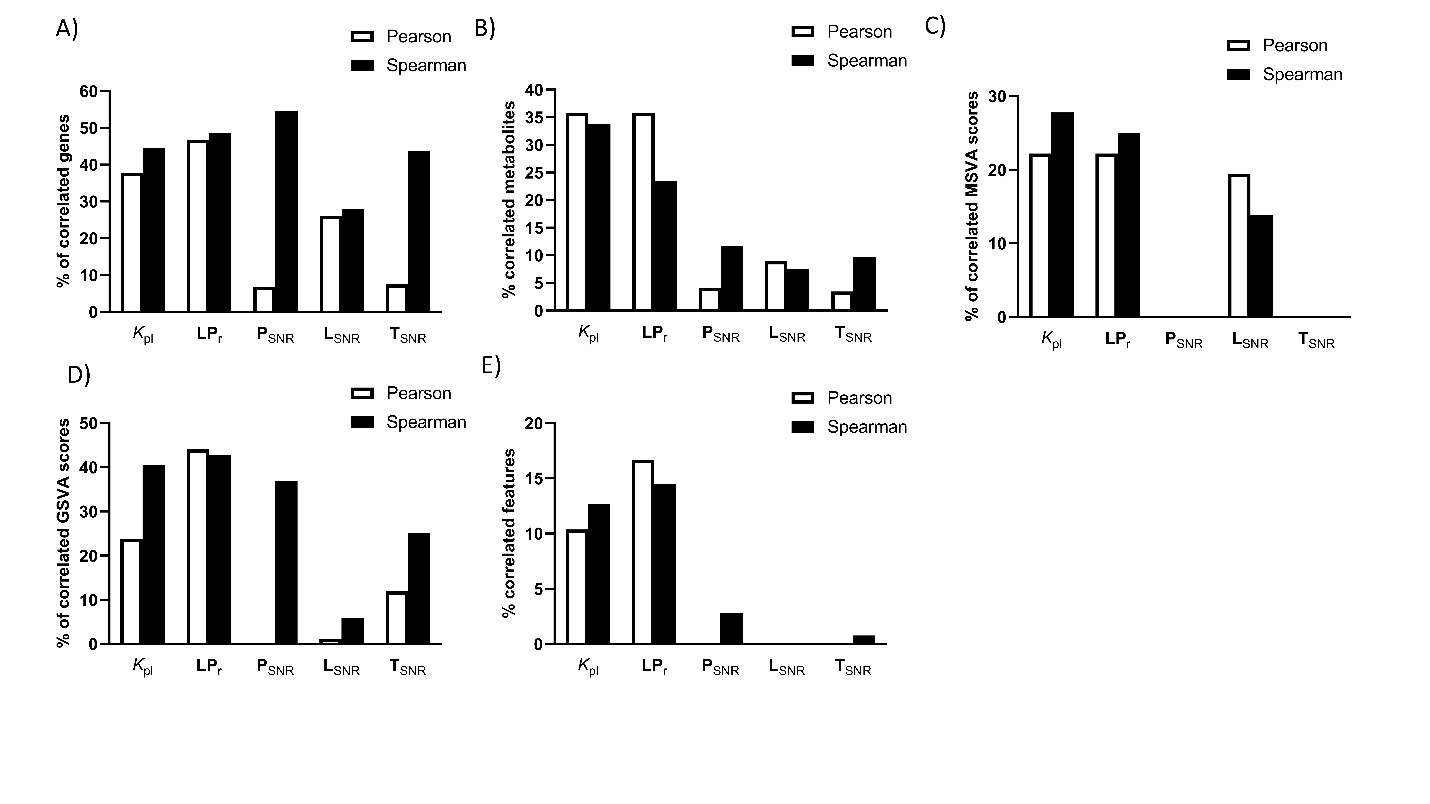
**

**Supplemental Figure 1.**

Metabolic imaging parameters correlate with many individual metabolic features.

Percentage of metabolic features that correlate with each individual 13C-HP-MRI imaging parameters, as determined by Pearson or Spearman correlation with A) 2522 metabolic transcript counts as determined by RNAseq, B) 84 individual metabolic pathways scores, determined by ssGSEA C) 145 different metabolite concentrations and D) 12319 different untargeted metabolomic features, determined by LC-MS analysis.

**
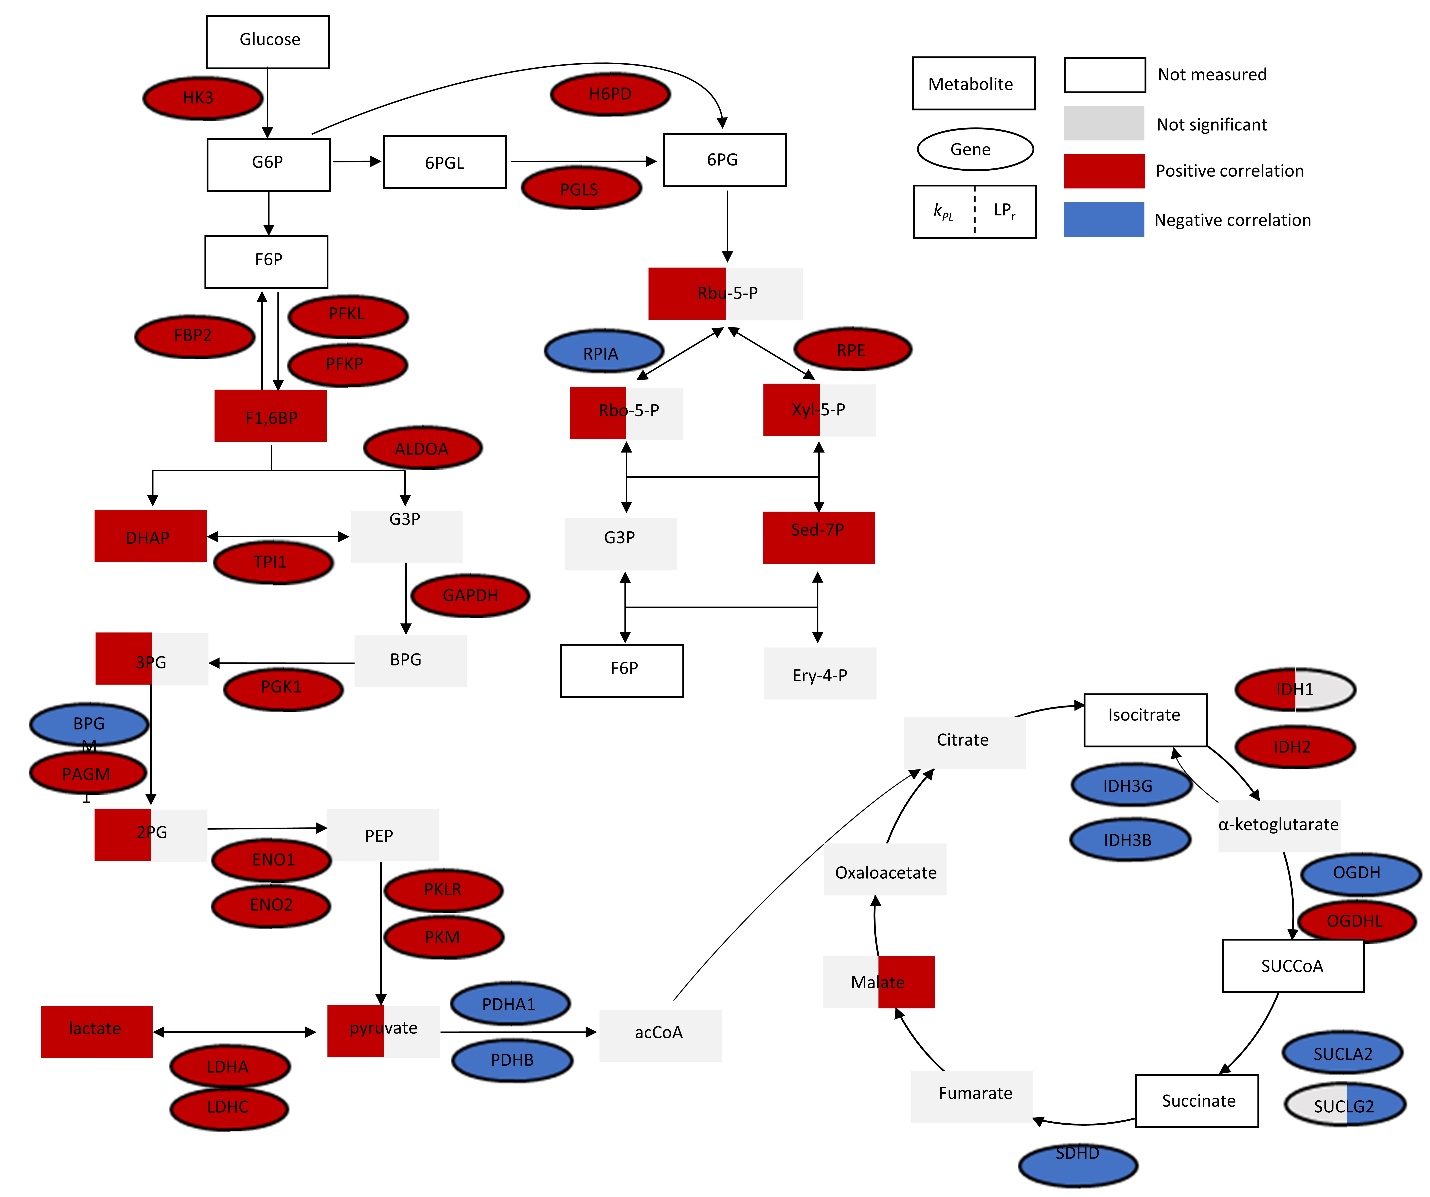
**

**Supplemental Figure 2.**

Diagram of glycolysis, pentose phosphate pathway and tricarboxylic acid cycle, highlighting the correlations between selected metabolites and genes with the 13C HP imaging parameters *k*PL and LPr.

Abbreviations for metabolite names are as follows, in alphabetical order: 2-PG (2-Phosphoglycerate), 3-PG (3-Phosphoglycerate), 6-PG (6-phosphogluconate), 6-PGL (6-phosphoglucono-δ-lactone), acCoA (Acetyl-Coenzyme), AKG (α-Ketoglutarate), BPG (Bisphosphoglycerate), DHAP (Dehydroxyacetonephosphate), Ery-4-P (Erythrose-4-phosphate), F1,6BP (Fructose-1,6-bisphosphate), F6P (Fructose-6-phosphate), FUM (Fumarate), G3P (Glyceraldehyde-3-phosphate), G6P (Glucose-6-phosphate), ISO (Isocitrate), Mal (Malate), OAA (Oxaloacetate), PEP (Phosphoenolpyruvate), Rbo-5-P (ribose-5-phosphate), Rbu-5-P (ribulose 5-phosphate), Sed-7-P (Sedeptulose-7-phosphate), SUC (Succinate), SuCCoa (Succinyl-CoenzymeA), Xyl-5-P (xylulose-5-phosphate).

**
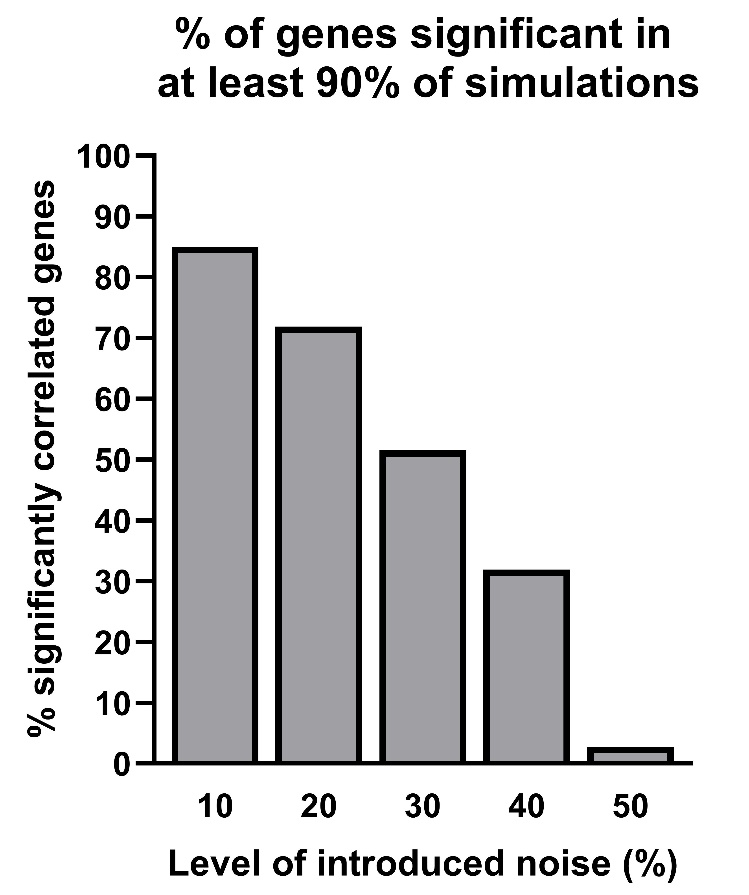
**

**Supplemental Figure 3.**

Introduction of small amounts of noise in *k*PL does not significantly affect the number of correlations with gene expression data.


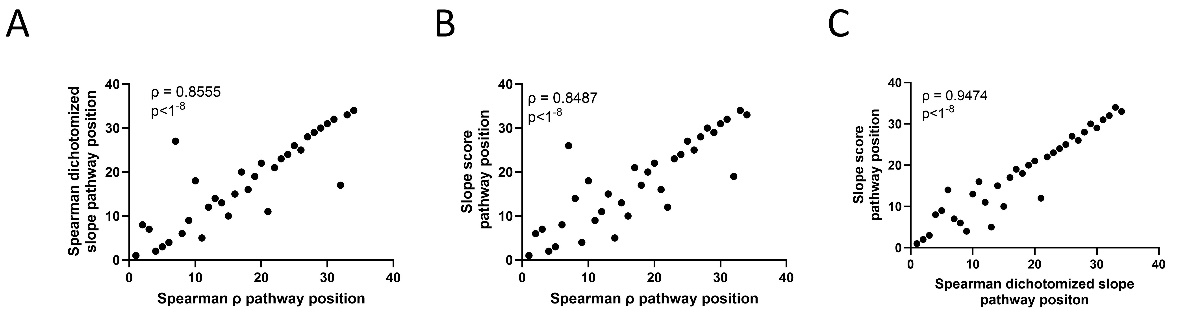


**Supplemental Figure 4.**

Different pathway consensus scoring algorithms show a high intercorrelation value.

(A-B) Correlation plots between different consensus scoring algorithms. (A) Dichotomized Pearson slope vs Spearman ρ, (B) Pearson slope vs Spearman ρ and (C) Pearson slope vs Dichotomized Pearson slope.


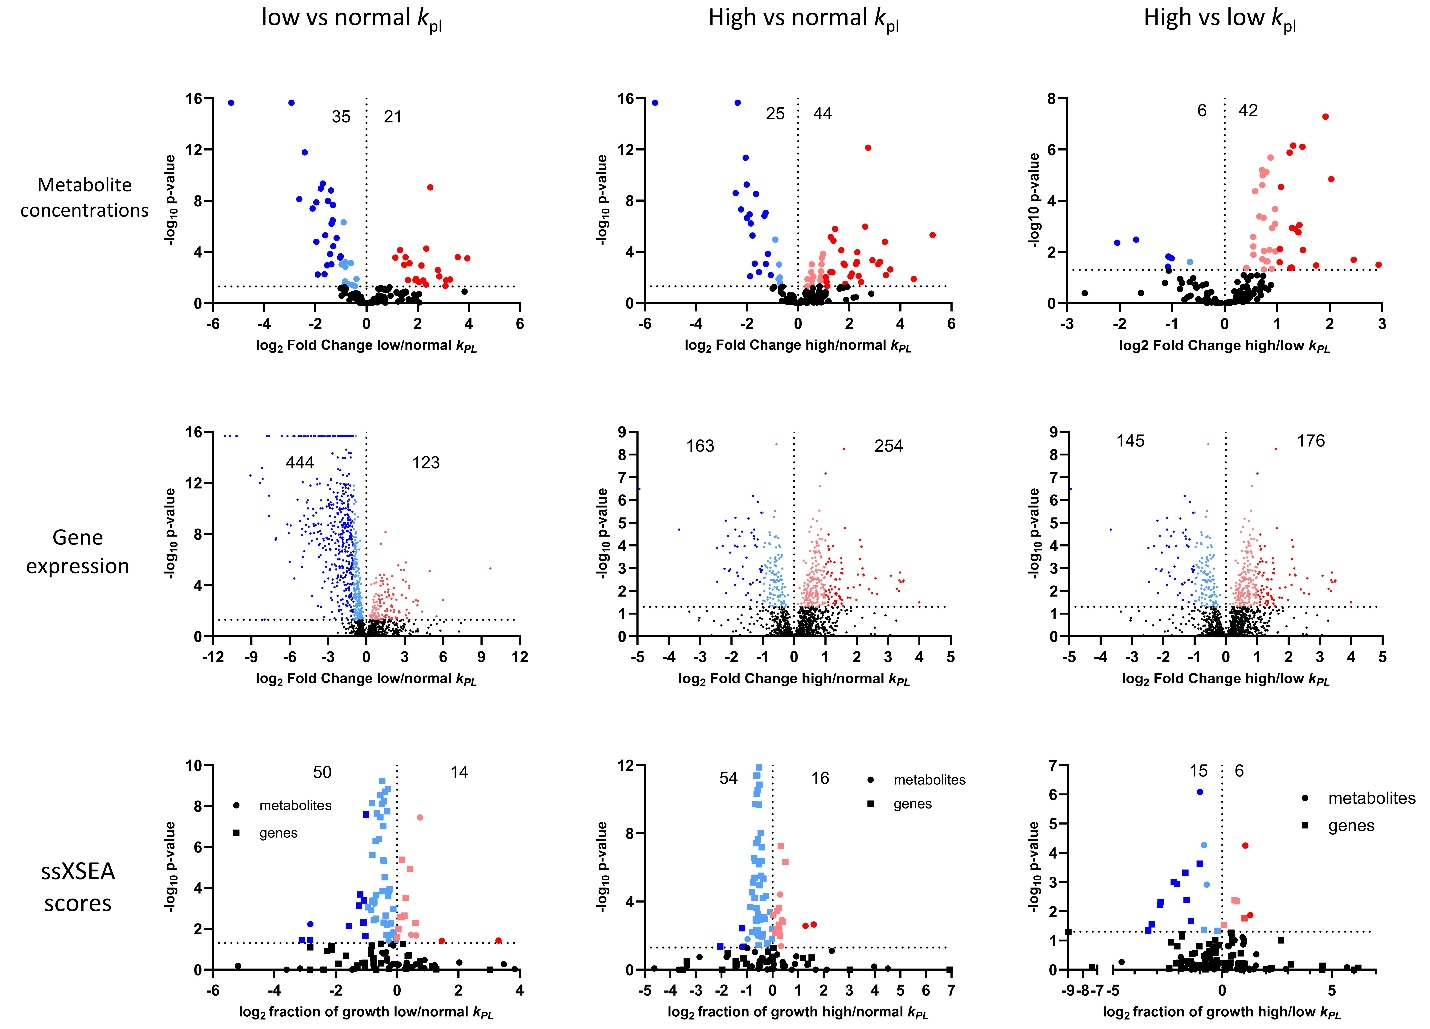


**Supplemental Figure 5.**

Highlighting differences between low *k*PL, high *k*PL and normal adjacent tissue.

A-I) Volcano plots of the ratios of (A,B,C) metabolite concentrations, (D,E,F) gene expression levels and (G,H,I) combined single sample metabolite set variation analysis score and single sample gene set variation analysis score (ssMSEA and ssGSEA, respectively), between (A,D,G) low *k*PL regions and healthy tissue, (B,E,H) high *k*PL regions and healthy tissue and adjacent healthy tissue and (C,F,I) high *k*PL vs low *k*PL regions. Light coloring indicates features increased by less than 2-fold and dark coloring indicate features increased by more than two-fold.

**Supplemental Table 1.**

Imaging parameters in individual biopsies

**Supplemental Table 2.**

RNAseq normalized gene counts.

**Supplemental Table 3.**

Metabolite concentrations in individual biopsies.

**Supplemental Table 4.**

Spearman and pearson correlation of metabolic genes and metabolic imaging parameters.

**Supplemental Table 5.**

Metabolic genes correlation parameters sorted by pathway.

**Supplemental Table 6.**

Spearman and pearson correlation of metabolites and metabolic imaging parameters.

**Supplemental Table 7.**

Metabolite correlation parameters sorted by pathway.
