# Supplementary material for: Deconvolving metabolic intratumoral heterogeneity in clear cell renal carcinoma with hyperpolarized 13C-pyruvate MRI
Source: Research Square preprint supplement (doi:10.21203/rs.3.rs-7989219/v1), 2026-01-29
Supplement: Supplementary file 2 [file 331f9bc8cbf25448b4b3c9d6.xlsx]

## Sheet: Kpl
	number changed	number total	perc changed	average spearman	sd spearman
001 hsa00010 Glycolysis Gluconeogenesis	5	12	41.67	0.495334	0.122941
002 hsa00020 Citrate cycle (TCA cycle)	1	7	14.29	0.345244	NA
003 hsa00030 Pentose phosphate pathway	6	13	46.15	0.569609	0.078627
004 hsa00040 Pentose and glucuronate interconversions	2	4	50	0.599288	0
005 hsa00051 Fructose and mannose metabolism	2	4	50	0.622132	0.0140255
006 hsa00052 Galactose metabolism	1	4	25	0.573881	NA
007 hsa00053 Ascorbate and aldarate metabolism	1	3	33.33	0.573881	NA
008 hsa00500 Starch and sucrose metabolism	0	1	0	NA	NA
009 hsa00520 Amino sugar and nucleotide sugar metabolism	0	1	0	NA	NA
010 hsa00620 Pyruvate metabolism	2	6	33.33	0.399689	0.0769978
011 hsa00630 Glyoxylate and dicarboxylate metabolism	4	10	40	0.253509	0.499975
012 hsa00640 Propanoate metabolism	1	3	33.33	-0.412749	NA
013 hsa00650 Butanoate metabolism	1	5	20	-0.505461	NA
014 hsa00562 Inositol phosphate metabolism	2	5	40	0.593048	0.0271055
016 hsa00910 Nitrogen metabolism	1	2	50	-0.473846	NA
017 hsa00920 Sulfur metabolism	0	0	NA	NA	NA
018 hsa00061 Fatty acid biosynthesis	0	1	0	NA	NA
019 hsa00062 Fatty acid elongation	0	1	0	NA	NA
020 hsa00071 Fatty acid degradation	0	2	0	NA	NA
021 hsa00100 Steroid biosynthesis	0	0	NA	NA	NA
022 hsa00120 Primary bile acid biosynthesis	1	2	50	0.498998	NA
023 hsa00140 Steroid hormone biosynthesis	0	0	NA	NA	NA
024 hsa00561 Glycerolipid metabolism	3	6	50	0.276652	0.608628
025 hsa00564 Glycerophospholipid metabolism	5	9	55.56	0.168933	0.569284
026 hsa00565 Ether lipid metabolism	1	1	100	-0.481614	NA
027 hsa00600 Sphingolipid metabolism	1	1	100	0.546246	NA
028 hsa00590 Arachidonic acid metabolism	0	0	NA	NA	NA
029 hsa00591 Linoleic acid metabolism	0	0	NA	NA	NA
030 hsa00592 alpha-Linolenic acid metabolism	0	0	NA	NA	NA
031 hsa01040 Biosynthesis of unsaturated fatty acids	0	0	NA	NA	NA
032 hsa00230 Purine metabolism	4	19	21.05	0.239239	0.476019
033 hsa00240 Pyrimidine metabolism	1	12	8.33	-0.473846	NA
034 hsa00250 Alanine, aspartate and glutamate metabolism	6	12	50	0.165626	0.514972
035 hsa00260 Glycine, serine and threonine metabolism	7	12	58.33	0.513297	0.0998458
036 hsa00270 Cysteine and methionine metabolism	3	8	37.5	0.430363	0.0838178
037 hsa00280 Valine, leucine and isoleucine degradation	3	4	75	0.519873	0.017278
038 hsa00290 Valine, leucine and isoleucine biosynthesis	4	4	100	0.522733	0.015223
039 hsa00310 Lysine degradation	1	5	20	-0.506575	NA
040 hsa00220 Arginine biosynthesis	4	10	40	0.0372108	0.582891
041 hsa00330 Arginine and proline metabolism	5	9	55.56	0.0824207	0.520003
042 hsa00340 Histidine metabolism	2	5	40	0.618454	0.202661
043 hsa00350 Tyrosine metabolism	2	4	50	0.478506	0.188461
044 hsa00360 Phenylalanine metabolism	2	2	100	0.582573	0.0412887
045 hsa00380 Tryptophan metabolism	2	5	40	0.00338497	0.887805
046 hsa00400 Phenylalanine, tyrosine and tryptophan biosynthesis	2	3	66.67	0.582573	0.0412887
047 hsa00410 beta-Alanine metabolism	2	7	28.57	-0.0151549	0.693398
048 hsa00430 Taurine and hypotaurine metabolism	0	3	0	NA	NA
049 hsa00440 Phosphonate and phosphinate metabolism	0	0	NA	NA	NA
050 hsa00450 Selenocompound metabolism	0	1	0	NA	NA
051 hsa00470 D-Amino acid metabolism	0	0	NA	NA	NA
052 hsa00480 Glutathione metabolism	3	11	27.27	0.254291	0.625999
053 hsa00510 N-Glycan biosynthesis	0	0	NA	NA	NA
054 hsa00513 Various types of N-glycan biosynthesis	0	0	NA	NA	NA
056 hsa00515 Mannose type O-glycan biosynthesis	0	1	0	NA	NA
057 hsa00514 Other types of O-glycan biosynthesis	0	1	0	NA	NA
058 hsa00532 Glycosaminoglycan biosynthesis - chondroitin sulfate dermatan sulfate	0	0	NA	NA	NA
061 hsa00531 Glycosaminoglycan degradation	0	0	NA	NA	NA
062 hsa00563 Glycosylphosphatidylinositol (GPI)-anchor biosynthesis	0	0	NA	NA	NA
064 hsa00603 Glycosphingolipid biosynthesis - globo and isoglobo series	0	0	NA	NA	NA
067 hsa00730 Thiamine metabolism	0	1	0	NA	NA
068 hsa00740 Riboflavin metabolism	0	1	0	NA	NA
069 hsa00750 Vitamin B6 metabolism	0	1	0	NA	NA
070 hsa00760 Nicotinate and nicotinamide metabolism	2	4	50	0.442724	0.0458588
071 hsa00770 Pantothenate and CoA biosynthesis	2	5	40	0.494986	0.0280511
072 hsa00780 Biotin metabolism	0	1	0	NA	NA
073 hsa00785 Lipoic acid metabolism	2	4	50	0.422121	0.108721
075 hsa00670 One carbon pool by folate	4	8	50	0.512091	0.0622654
076 hsa00830 Retinol metabolism	0	0	NA	NA	NA
077 hsa00860 Porphyrin metabolism	1	2	50	0.498998	NA
078 hsa00130 Ubiquinone and other terpenoid-quinone biosynthesis	1	2	50	0.611768	NA
079 hsa00900 Terpenoid backbone biosynthesis	0	1	0	NA	NA
080 hsa00232 Caffeine metabolism	0	0	NA	NA	NA
081 hsa00524 Neomycin, kanamycin and gentamicin biosynthesis	0	0	NA	NA	NA
082 hsa00980 Metabolism of xenobiotics by cytochrome P450	0	0	NA	NA	NA
083 hsa00982 Drug metabolism - cytochrome P450	0	0	NA	NA	NA
084 hsa00983 Drug metabolism - other enzymes	0	2	0	NA	NA

## Sheet: Lpr
	number changed	number total	perc changed	average spearman	sd spearman
001 hsa00010 Glycolysis Gluconeogenesis	4	12	33.33	0.492996	0.119525
002 hsa00020 Citrate cycle (TCA cycle)	1	7	14.29	0.382903	NA
003 hsa00030 Pentose phosphate pathway	6	13	46.15	0.481915	0.0923608
004 hsa00040 Pentose and glucuronate interconversions	2	4	50	0.435465	0
005 hsa00051 Fructose and mannose metabolism	3	4	75	0.522856	0.126806
006 hsa00052 Galactose metabolism	1	4	25	0.525015	NA
007 hsa00053 Ascorbate and aldarate metabolism	1	3	33.33	0.525015	NA
008 hsa00500 Starch and sucrose metabolism	0	1	0	NA	NA
009 hsa00520 Amino sugar and nucleotide sugar metabolism	0	1	0	NA	NA
010 hsa00620 Pyruvate metabolism	2	6	33.33	0.39316	0.0145055
011 hsa00630 Glyoxylate and dicarboxylate metabolism	4	10	40	0.228566	0.511691
012 hsa00640 Propanoate metabolism	0	3	0	NA	NA
013 hsa00650 Butanoate metabolism	1	5	20	-0.505586	NA
014 hsa00562 Inositol phosphate metabolism	3	5	60	0.475364	0.0473231
016 hsa00910 Nitrogen metabolism	1	2	50	-0.528941	NA
017 hsa00920 Sulfur metabolism	0	0	NA	NA	NA
018 hsa00061 Fatty acid biosynthesis	0	1	0	NA	NA
019 hsa00062 Fatty acid elongation	0	1	0	NA	NA
020 hsa00071 Fatty acid degradation	0	2	0	NA	NA
021 hsa00100 Steroid biosynthesis	0	0	NA	NA	NA
022 hsa00120 Primary bile acid biosynthesis	1	2	50	0.58464	NA
023 hsa00140 Steroid hormone biosynthesis	0	0	NA	NA	NA
024 hsa00561 Glycerolipid metabolism	2	6	33.33	0.472982	0.00378979
025 hsa00564 Glycerophospholipid metabolism	4	9	44.44	0.480373	0.00773117
026 hsa00565 Ether lipid metabolism	0	1	0	NA	NA
027 hsa00600 Sphingolipid metabolism	1	1	100	0.480798	NA
028 hsa00590 Arachidonic acid metabolism	0	0	NA	NA	NA
029 hsa00591 Linoleic acid metabolism	0	0	NA	NA	NA
030 hsa00592 alpha-Linolenic acid metabolism	0	0	NA	NA	NA
031 hsa01040 Biosynthesis of unsaturated fatty acids	0	0	NA	NA	NA
032 hsa00230 Purine metabolism	5	19	26.32	0.135191	0.56575
033 hsa00240 Pyrimidine metabolism	1	12	8.33	-0.528941	NA
034 hsa00250 Alanine, aspartate and glutamate metabolism	4	12	33.33	0.253487	0.529522
035 hsa00260 Glycine, serine and threonine metabolism	5	12	41.67	0.491741	0.0529755
036 hsa00270 Cysteine and methionine metabolism	1	8	12.5	0.55092	NA
037 hsa00280 Valine, leucine and isoleucine degradation	0	4	0	NA	NA
038 hsa00290 Valine, leucine and isoleucine biosynthesis	1	4	25	0.454894	NA
039 hsa00310 Lysine degradation	0	5	0	NA	NA
040 hsa00220 Arginine biosynthesis	4	10	40	0.248406	0.522427
041 hsa00330 Arginine and proline metabolism	2	9	22.22	0.465725	0.00489515
042 hsa00340 Histidine metabolism	3	5	60	0.218496	0.637341
043 hsa00350 Tyrosine metabolism	1	4	25	0.564542	NA
044 hsa00360 Phenylalanine metabolism	1	2	50	0.564542	NA
045 hsa00380 Tryptophan metabolism	2	5	40	0.055209	0.861475
046 hsa00400 Phenylalanine, tyrosine and tryptophan biosynthesis	1	3	33.33	0.564542	NA
047 hsa00410 beta-Alanine metabolism	1	7	14.29	0.452884	NA
048 hsa00430 Taurine and hypotaurine metabolism	0	3	0	NA	NA
049 hsa00440 Phosphonate and phosphinate metabolism	0	0	NA	NA	NA
050 hsa00450 Selenocompound metabolism	0	1	0	NA	NA
051 hsa00470 D-Amino acid metabolism	0	0	NA	NA	NA
052 hsa00480 Glutathione metabolism	2	11	18.18	0.621711	0.0524254
053 hsa00510 N-Glycan biosynthesis	0	0	NA	NA	NA
054 hsa00513 Various types of N-glycan biosynthesis	0	0	NA	NA	NA
056 hsa00515 Mannose type O-glycan biosynthesis	0	1	0	NA	NA
057 hsa00514 Other types of O-glycan biosynthesis	0	1	0	NA	NA
058 hsa00532 Glycosaminoglycan biosynthesis - chondroitin sulfate dermatan sulfate	0	0	NA	NA	NA
061 hsa00531 Glycosaminoglycan degradation	0	0	NA	NA	NA
062 hsa00563 Glycosylphosphatidylinositol (GPI)-anchor biosynthesis	0	0	NA	NA	NA
064 hsa00603 Glycosphingolipid biosynthesis - globo and isoglobo series	0	0	NA	NA	NA
067 hsa00730 Thiamine metabolism	0	1	0	NA	NA
068 hsa00740 Riboflavin metabolism	0	1	0	NA	NA
069 hsa00750 Vitamin B6 metabolism	0	1	0	NA	NA
070 hsa00760 Nicotinate and nicotinamide metabolism	2	4	50	0.45601	0.00442142
071 hsa00770 Pantothenate and CoA biosynthesis	1	5	20	0.452884	NA
072 hsa00780 Biotin metabolism	0	1	0	NA	NA
073 hsa00785 Lipoic acid metabolism	1	4	25	0.58464	NA
075 hsa00670 One carbon pool by folate	4	8	50	0.548686	0.0472645
076 hsa00830 Retinol metabolism	0	0	NA	NA	NA
077 hsa00860 Porphyrin metabolism	1	2	50	0.58464	NA
078 hsa00130 Ubiquinone and other terpenoid-quinone biosynthesis	1	2	50	0.564542	NA
079 hsa00900 Terpenoid backbone biosynthesis	0	1	0	NA	NA
080 hsa00232 Caffeine metabolism	0	0	NA	NA	NA
081 hsa00524 Neomycin, kanamycin and gentamicin biosynthesis	0	0	NA	NA	NA
082 hsa00980 Metabolism of xenobiotics by cytochrome P450	0	0	NA	NA	NA
083 hsa00982 Drug metabolism - cytochrome P450	0	0	NA	NA	NA
084 hsa00983 Drug metabolism - other enzymes	0	2	0	NA	NA

## Sheet: SNR lac
	number changed	number total	perc changed	average spearman	sd spearman
001 hsa00010 Glycolysis Gluconeogenesis	1	12	8.33	0.526646	NA
002 hsa00020 Citrate cycle (TCA cycle)	0	7	0	NA	NA
003 hsa00030 Pentose phosphate pathway	2	13	15.38	0.571462	0.0633796
004 hsa00040 Pentose and glucuronate interconversions	0	4	0	NA	NA
005 hsa00051 Fructose and mannose metabolism	1	4	25	0.526646	NA
006 hsa00052 Galactose metabolism	0	4	0	NA	NA
007 hsa00053 Ascorbate and aldarate metabolism	0	3	0	NA	NA
008 hsa00500 Starch and sucrose metabolism	0	1	0	NA	NA
009 hsa00520 Amino sugar and nucleotide sugar metabolism	0	1	0	NA	NA
010 hsa00620 Pyruvate metabolism	0	6	0	NA	NA
011 hsa00630 Glyoxylate and dicarboxylate metabolism	1	10	10	0.616278	NA
012 hsa00640 Propanoate metabolism	0	3	0	NA	NA
013 hsa00650 Butanoate metabolism	1	5	20	-0.541361	NA
014 hsa00562 Inositol phosphate metabolism	0	5	0	NA	NA
016 hsa00910 Nitrogen metabolism	0	2	0	NA	NA
017 hsa00920 Sulfur metabolism	0	0	NA	NA	NA
018 hsa00061 Fatty acid biosynthesis	0	1	0	NA	NA
019 hsa00062 Fatty acid elongation	0	1	0	NA	NA
020 hsa00071 Fatty acid degradation	0	2	0	NA	NA
021 hsa00100 Steroid biosynthesis	0	0	NA	NA	NA
022 hsa00120 Primary bile acid biosynthesis	0	2	0	NA	NA
023 hsa00140 Steroid hormone biosynthesis	0	0	NA	NA	NA
024 hsa00561 Glycerolipid metabolism	1	6	16.67	0.616278	NA
025 hsa00564 Glycerophospholipid metabolism	0	9	0	NA	NA
026 hsa00565 Ether lipid metabolism	0	1	0	NA	NA
027 hsa00600 Sphingolipid metabolism	0	1	0	NA	NA
028 hsa00590 Arachidonic acid metabolism	0	0	NA	NA	NA
029 hsa00591 Linoleic acid metabolism	0	0	NA	NA	NA
030 hsa00592 alpha-Linolenic acid metabolism	0	0	NA	NA	NA
031 hsa01040 Biosynthesis of unsaturated fatty acids	0	0	NA	NA	NA
032 hsa00230 Purine metabolism	1	19	5.26	-0.509923	NA
033 hsa00240 Pyrimidine metabolism	0	12	0	NA	NA
034 hsa00250 Alanine, aspartate and glutamate metabolism	0	12	0	NA	NA
035 hsa00260 Glycine, serine and threonine metabolism	1	12	8.33	0.616278	NA
036 hsa00270 Cysteine and methionine metabolism	0	8	0	NA	NA
037 hsa00280 Valine, leucine and isoleucine degradation	0	4	0	NA	NA
038 hsa00290 Valine, leucine and isoleucine biosynthesis	0	4	0	NA	NA
039 hsa00310 Lysine degradation	1	5	20	-0.657081	NA
040 hsa00220 Arginine biosynthesis	2	10	20	0.0222966	0.752673
041 hsa00330 Arginine and proline metabolism	1	9	11.11	-0.509923	NA
042 hsa00340 Histidine metabolism	1	5	20	0.737572	NA
043 hsa00350 Tyrosine metabolism	0	4	0	NA	NA
044 hsa00360 Phenylalanine metabolism	0	2	0	NA	NA
045 hsa00380 Tryptophan metabolism	1	5	20	-0.556647	NA
046 hsa00400 Phenylalanine, tyrosine and tryptophan biosynthesis	0	3	0	NA	NA
047 hsa00410 beta-Alanine metabolism	0	7	0	NA	NA
048 hsa00430 Taurine and hypotaurine metabolism	0	3	0	NA	NA
049 hsa00440 Phosphonate and phosphinate metabolism	0	0	NA	NA	NA
050 hsa00450 Selenocompound metabolism	0	1	0	NA	NA
051 hsa00470 D-Amino acid metabolism	0	0	NA	NA	NA
052 hsa00480 Glutathione metabolism	1	11	9.09	0.59688	NA
053 hsa00510 N-Glycan biosynthesis	0	0	NA	NA	NA
054 hsa00513 Various types of N-glycan biosynthesis	0	0	NA	NA	NA
056 hsa00515 Mannose type O-glycan biosynthesis	0	1	0	NA	NA
057 hsa00514 Other types of O-glycan biosynthesis	0	1	0	NA	NA
058 hsa00532 Glycosaminoglycan biosynthesis - chondroitin sulfate dermatan sulfate	0	0	NA	NA	NA
061 hsa00531 Glycosaminoglycan degradation	0	0	NA	NA	NA
062 hsa00563 Glycosylphosphatidylinositol (GPI)-anchor biosynthesis	0	0	NA	NA	NA
064 hsa00603 Glycosphingolipid biosynthesis - globo and isoglobo series	0	0	NA	NA	NA
067 hsa00730 Thiamine metabolism	0	1	0	NA	NA
068 hsa00740 Riboflavin metabolism	0	1	0	NA	NA
069 hsa00750 Vitamin B6 metabolism	0	1	0	NA	NA
070 hsa00760 Nicotinate and nicotinamide metabolism	0	4	0	NA	NA
071 hsa00770 Pantothenate and CoA biosynthesis	0	5	0	NA	NA
072 hsa00780 Biotin metabolism	0	1	0	NA	NA
073 hsa00785 Lipoic acid metabolism	0	4	0	NA	NA
075 hsa00670 One carbon pool by folate	0	8	0	NA	NA
076 hsa00830 Retinol metabolism	0	0	NA	NA	NA
077 hsa00860 Porphyrin metabolism	0	2	0	NA	NA
078 hsa00130 Ubiquinone and other terpenoid-quinone biosynthesis	0	2	0	NA	NA
079 hsa00900 Terpenoid backbone biosynthesis	0	1	0	NA	NA
080 hsa00232 Caffeine metabolism	0	0	NA	NA	NA
081 hsa00524 Neomycin, kanamycin and gentamicin biosynthesis	0	0	NA	NA	NA
082 hsa00980 Metabolism of xenobiotics by cytochrome P450	0	0	NA	NA	NA
083 hsa00982 Drug metabolism - cytochrome P450	0	0	NA	NA	NA
084 hsa00983 Drug metabolism - other enzymes	0	2	0	NA	NA

## Sheet: SNR pyr
	number changed	number total	perc changed	average spearman	sd spearman
001 hsa00010 Glycolysis Gluconeogenesis	0	12	0	NA	NA
002 hsa00020 Citrate cycle (TCA cycle)	1	7	14.29	0.483402	NA
003 hsa00030 Pentose phosphate pathway	2	13	15.38	0.531105	0.026487
004 hsa00040 Pentose and glucuronate interconversions	0	4	0	NA	NA
005 hsa00051 Fructose and mannose metabolism	0	4	0	NA	NA
006 hsa00052 Galactose metabolism	0	4	0	NA	NA
007 hsa00053 Ascorbate and aldarate metabolism	1	3	33.33	0.483402	NA
008 hsa00500 Starch and sucrose metabolism	0	1	0	NA	NA
009 hsa00520 Amino sugar and nucleotide sugar metabolism	0	1	0	NA	NA
010 hsa00620 Pyruvate metabolism	0	6	0	NA	NA
011 hsa00630 Glyoxylate and dicarboxylate metabolism	3	10	30	0.577366	0.110337
012 hsa00640 Propanoate metabolism	0	3	0	NA	NA
013 hsa00650 Butanoate metabolism	2	5	40	-0.0557355	0.762456
014 hsa00562 Inositol phosphate metabolism	0	5	0	NA	NA
016 hsa00910 Nitrogen metabolism	1	2	50	0.698863	NA
017 hsa00920 Sulfur metabolism	0	0	NA	NA	NA
018 hsa00061 Fatty acid biosynthesis	0	1	0	NA	NA
019 hsa00062 Fatty acid elongation	0	1	0	NA	NA
020 hsa00071 Fatty acid degradation	0	2	0	NA	NA
021 hsa00100 Steroid biosynthesis	0	0	NA	NA	NA
022 hsa00120 Primary bile acid biosynthesis	0	2	0	NA	NA
023 hsa00140 Steroid hormone biosynthesis	0	0	NA	NA	NA
024 hsa00561 Glycerolipid metabolism	1	6	16.67	0.549834	NA
025 hsa00564 Glycerophospholipid metabolism	0	9	0	NA	NA
026 hsa00565 Ether lipid metabolism	0	1	0	NA	NA
027 hsa00600 Sphingolipid metabolism	0	1	0	NA	NA
028 hsa00590 Arachidonic acid metabolism	0	0	NA	NA	NA
029 hsa00591 Linoleic acid metabolism	0	0	NA	NA	NA
030 hsa00592 alpha-Linolenic acid metabolism	0	0	NA	NA	NA
031 hsa01040 Biosynthesis of unsaturated fatty acids	0	0	NA	NA	NA
032 hsa00230 Purine metabolism	2	19	10.53	0.0708355	0.888165
033 hsa00240 Pyrimidine metabolism	1	12	8.33	0.698863	NA
034 hsa00250 Alanine, aspartate and glutamate metabolism	3	12	25	0.56711	0.115486
035 hsa00260 Glycine, serine and threonine metabolism	2	12	16.67	0.595877	0.0651139
036 hsa00270 Cysteine and methionine metabolism	1	8	12.5	0.736011	NA
037 hsa00280 Valine, leucine and isoleucine degradation	0	4	0	NA	NA
038 hsa00290 Valine, leucine and isoleucine biosynthesis	0	4	0	NA	NA
039 hsa00310 Lysine degradation	3	5	60	0.0975887	0.751997
040 hsa00220 Arginine biosynthesis	5	10	50	0.349854	0.513851
041 hsa00330 Arginine and proline metabolism	2	9	22.22	0.0239688	0.821886
042 hsa00340 Histidine metabolism	1	5	20	0.618508	NA
043 hsa00350 Tyrosine metabolism	0	4	0	NA	NA
044 hsa00360 Phenylalanine metabolism	0	2	0	NA	NA
045 hsa00380 Tryptophan metabolism	0	5	0	NA	NA
046 hsa00400 Phenylalanine, tyrosine and tryptophan biosynthesis	0	3	0	NA	NA
047 hsa00410 beta-Alanine metabolism	0	7	0	NA	NA
048 hsa00430 Taurine and hypotaurine metabolism	0	3	0	NA	NA
049 hsa00440 Phosphonate and phosphinate metabolism	0	0	NA	NA	NA
050 hsa00450 Selenocompound metabolism	0	1	0	NA	NA
051 hsa00470 D-Amino acid metabolism	0	0	NA	NA	NA
052 hsa00480 Glutathione metabolism	0	11	0	NA	NA
053 hsa00510 N-Glycan biosynthesis	0	0	NA	NA	NA
054 hsa00513 Various types of N-glycan biosynthesis	0	0	NA	NA	NA
056 hsa00515 Mannose type O-glycan biosynthesis	0	1	0	NA	NA
057 hsa00514 Other types of O-glycan biosynthesis	0	1	0	NA	NA
058 hsa00532 Glycosaminoglycan biosynthesis - chondroitin sulfate dermatan sulfate	0	0	NA	NA	NA
061 hsa00531 Glycosaminoglycan degradation	0	0	NA	NA	NA
062 hsa00563 Glycosylphosphatidylinositol (GPI)-anchor biosynthesis	0	0	NA	NA	NA
064 hsa00603 Glycosphingolipid biosynthesis - globo and isoglobo series	0	0	NA	NA	NA
067 hsa00730 Thiamine metabolism	0	1	0	NA	NA
068 hsa00740 Riboflavin metabolism	0	1	0	NA	NA
069 hsa00750 Vitamin B6 metabolism	0	1	0	NA	NA
070 hsa00760 Nicotinate and nicotinamide metabolism	0	4	0	NA	NA
071 hsa00770 Pantothenate and CoA biosynthesis	0	5	0	NA	NA
072 hsa00780 Biotin metabolism	1	1	100	0.578374	NA
073 hsa00785 Lipoic acid metabolism	1	4	25	0.483402	NA
075 hsa00670 One carbon pool by folate	1	8	12.5	0.641919	NA
076 hsa00830 Retinol metabolism	0	0	NA	NA	NA
077 hsa00860 Porphyrin metabolism	0	2	0	NA	NA
078 hsa00130 Ubiquinone and other terpenoid-quinone biosynthesis	0	2	0	NA	NA
079 hsa00900 Terpenoid backbone biosynthesis	0	1	0	NA	NA
080 hsa00232 Caffeine metabolism	0	0	NA	NA	NA
081 hsa00524 Neomycin, kanamycin and gentamicin biosynthesis	0	0	NA	NA	NA
082 hsa00980 Metabolism of xenobiotics by cytochrome P450	0	0	NA	NA	NA
083 hsa00982 Drug metabolism - cytochrome P450	0	0	NA	NA	NA
084 hsa00983 Drug metabolism - other enzymes	0	2	0	NA	NA

## Sheet: SNR Total carbon
	number changed	number total	perc changed	average spearman	sd spearman
001 hsa00010 Glycolysis Gluconeogenesis	0	12	0	NA	NA
002 hsa00020 Citrate cycle (TCA cycle)	0	7	0	NA	NA
003 hsa00030 Pentose phosphate pathway	1	13	7.69	0.584356	NA
004 hsa00040 Pentose and glucuronate interconversions	0	4	0	NA	NA
005 hsa00051 Fructose and mannose metabolism	0	4	0	NA	NA
006 hsa00052 Galactose metabolism	0	4	0	NA	NA
007 hsa00053 Ascorbate and aldarate metabolism	0	3	0	NA	NA
008 hsa00500 Starch and sucrose metabolism	0	1	0	NA	NA
009 hsa00520 Amino sugar and nucleotide sugar metabolism	0	1	0	NA	NA
010 hsa00620 Pyruvate metabolism	0	6	0	NA	NA
011 hsa00630 Glyoxylate and dicarboxylate metabolism	2	10	20	0.559161	0.0356307
012 hsa00640 Propanoate metabolism	0	3	0	NA	NA
013 hsa00650 Butanoate metabolism	1	5	20	-0.637398	NA
014 hsa00562 Inositol phosphate metabolism	0	5	0	NA	NA
016 hsa00910 Nitrogen metabolism	1	2	50	0.533966	NA
017 hsa00920 Sulfur metabolism	0	0	NA	NA	NA
018 hsa00061 Fatty acid biosynthesis	0	1	0	NA	NA
019 hsa00062 Fatty acid elongation	0	1	0	NA	NA
020 hsa00071 Fatty acid degradation	0	2	0	NA	NA
021 hsa00100 Steroid biosynthesis	0	0	NA	NA	NA
022 hsa00120 Primary bile acid biosynthesis	0	2	0	NA	NA
023 hsa00140 Steroid hormone biosynthesis	0	0	NA	NA	NA
024 hsa00561 Glycerolipid metabolism	1	6	16.67	0.584356	NA
025 hsa00564 Glycerophospholipid metabolism	0	9	0	NA	NA
026 hsa00565 Ether lipid metabolism	0	1	0	NA	NA
027 hsa00600 Sphingolipid metabolism	0	1	0	NA	NA
028 hsa00590 Arachidonic acid metabolism	0	0	NA	NA	NA
029 hsa00591 Linoleic acid metabolism	0	0	NA	NA	NA
030 hsa00592 alpha-Linolenic acid metabolism	0	0	NA	NA	NA
031 hsa01040 Biosynthesis of unsaturated fatty acids	0	0	NA	NA	NA
032 hsa00230 Purine metabolism	2	19	10.53	-0.0206259	0.784312
033 hsa00240 Pyrimidine metabolism	1	12	8.33	0.533966	NA
034 hsa00250 Alanine, aspartate and glutamate metabolism	1	12	8.33	0.533966	NA
035 hsa00260 Glycine, serine and threonine metabolism	1	12	8.33	0.584356	NA
036 hsa00270 Cysteine and methionine metabolism	1	8	12.5	0.5458	NA
037 hsa00280 Valine, leucine and isoleucine degradation	0	4	0	NA	NA
038 hsa00290 Valine, leucine and isoleucine biosynthesis	0	4	0	NA	NA
039 hsa00310 Lysine degradation	1	5	20	-0.737911	NA
040 hsa00220 Arginine biosynthesis	4	10	40	0.254731	0.553316
041 hsa00330 Arginine and proline metabolism	2	9	22.22	-0.0201694	0.784958
042 hsa00340 Histidine metabolism	1	5	20	0.749723	NA
043 hsa00350 Tyrosine metabolism	0	4	0	NA	NA
044 hsa00360 Phenylalanine metabolism	0	2	0	NA	NA
045 hsa00380 Tryptophan metabolism	0	5	0	NA	NA
046 hsa00400 Phenylalanine, tyrosine and tryptophan biosynthesis	0	3	0	NA	NA
047 hsa00410 beta-Alanine metabolism	0	7	0	NA	NA
048 hsa00430 Taurine and hypotaurine metabolism	0	3	0	NA	NA
049 hsa00440 Phosphonate and phosphinate metabolism	0	0	NA	NA	NA
050 hsa00450 Selenocompound metabolism	0	1	0	NA	NA
051 hsa00470 D-Amino acid metabolism	0	0	NA	NA	NA
052 hsa00480 Glutathione metabolism	1	11	9.09	0.586807	NA
053 hsa00510 N-Glycan biosynthesis	0	0	NA	NA	NA
054 hsa00513 Various types of N-glycan biosynthesis	0	0	NA	NA	NA
056 hsa00515 Mannose type O-glycan biosynthesis	0	1	0	NA	NA
057 hsa00514 Other types of O-glycan biosynthesis	0	1	0	NA	NA
058 hsa00532 Glycosaminoglycan biosynthesis - chondroitin sulfate dermatan sulfate	0	0	NA	NA	NA
061 hsa00531 Glycosaminoglycan degradation	0	0	NA	NA	NA
062 hsa00563 Glycosylphosphatidylinositol (GPI)-anchor biosynthesis	0	0	NA	NA	NA
064 hsa00603 Glycosphingolipid biosynthesis - globo and isoglobo series	0	0	NA	NA	NA
067 hsa00730 Thiamine metabolism	0	1	0	NA	NA
068 hsa00740 Riboflavin metabolism	0	1	0	NA	NA
069 hsa00750 Vitamin B6 metabolism	0	1	0	NA	NA
070 hsa00760 Nicotinate and nicotinamide metabolism	0	4	0	NA	NA
071 hsa00770 Pantothenate and CoA biosynthesis	0	5	0	NA	NA
072 hsa00780 Biotin metabolism	0	1	0	NA	NA
073 hsa00785 Lipoic acid metabolism	0	4	0	NA	NA
075 hsa00670 One carbon pool by folate	0	8	0	NA	NA
076 hsa00830 Retinol metabolism	0	0	NA	NA	NA
077 hsa00860 Porphyrin metabolism	0	2	0	NA	NA
078 hsa00130 Ubiquinone and other terpenoid-quinone biosynthesis	0	2	0	NA	NA
079 hsa00900 Terpenoid backbone biosynthesis	0	1	0	NA	NA
080 hsa00232 Caffeine metabolism	0	0	NA	NA	NA
081 hsa00524 Neomycin, kanamycin and gentamicin biosynthesis	0	0	NA	NA	NA
082 hsa00980 Metabolism of xenobiotics by cytochrome P450	0	0	NA	NA	NA
083 hsa00982 Drug metabolism - cytochrome P450	0	0	NA	NA	NA
084 hsa00983 Drug metabolism - other enzymes	0	2	0	NA	NA
