# Supplementary material for: Deconvolving metabolic intratumoral heterogeneity in clear cell renal carcinoma with hyperpolarized 13C-pyruvate MRI
Source: Research Square preprint supplement (doi:10.21203/rs.3.rs-7989219/v1), 2026-01-29
Supplement: Supplementary file 3 [file 3e82d91e629a906ac88518cc.xlsx]

## Sheet: Kpl
	Pearson correlations				Spearman Correlations
Gene name	Corrected p-value	Slope	Intercept	r2	corrected_spearman_P	spearman_coef
HK3	0.155515	29367.7	522.571	0.0623649	0.0136932	0.490087
HK1	0.274496	12320.1	4627.51	0.0104188	0.273083	0.0799733
HK2	0.159793	35849.5	2170.16	0.0603516	0.146858	0.230341
HK2P1	0.278453	17.038	0.994914	0.00907467	0.398511	-0.00936551
HKDC1	0.00154396	169896	29.4836	0.431056	4.41794e-06	0.82602
GCK	0.532076	-0.118993	8.70005	3.20377e-08	0.312121	-0.0358655
GCKR	0.234689	-1623.87	74.8706	0.021256	0.201329	-0.167521
GPI	0.305279	-25376.2	12645.6	0.00474417	0.398511	0.00868791
GPIHBP1	0.0166684	-26941.9	773.599	0.246918	0.0969791	-0.300067
PFKM	0.225059	-7403.01	1791.05	0.0259056	0.122531	-0.263979
PFKP	0.0390344	321998	12766	0.179214	0.027969	0.434841
PFKL	0.0517536	167028	11180.8	0.154818	0.0307549	0.426599
FBP1	0.259715	-17249.5	1256.02	0.0143327	0.267156	-0.0913345
FBP2	0.00486788	336.509	-0.74138	0.341427	0.00375627	0.573076
ALDOC	0.315002	-9185.45	2139.27	0.00253925	0.312378	0.0278459
ALDOA	0.00669808	3.04397e+06	42300	0.316334	4.45252e-05	0.756517
ALDOAP1	0.14431	68.0172	1.21068	0.0676814	0.0256409	0.443403
ALDOAP2	0.305279	30.8471	3.74941	0.00515975	0.15102	0.225465
ALDOB	0.315002	11394.3	790.974	0.00276135	0.252344	0.111383
TPI1	0.00269312	2.0875e+06	18999.7	0.387931	2.31349e-05	0.781021
TPI1P1	0.0032715	7305.12	62.4587	0.370844	7.46357e-05	0.738027
TPI1P2	0.316769	-53.34	18.9011	0.00194357	0.258706	0.101359
TPI1P3	0.205028	44.7666	2.29837	0.0372626	0.136134	0.243707
GAPDH	0.00451288	2.40423e+06	35242.5	0.346583	0.000133204	0.714636
GAPDHP1	0.000786717	8506.66	97.1154	0.483862	1.30364e-05	0.799288
GAPDHP14	0.0106212	2500.28	-8.83411	0.279643	4.03349e-05	0.759858
GAPDHP2	0.119026	166.329	4.24369	0.0858587	0.0745588	0.336155
GAPDHP21	0.00291758	914.457	-2.60762	0.380788	2.75786e-05	0.773904
GAPDHP27	0.224555	39.3616	1.18774	0.0268602	0.226394	0.132716
GAPDHP32	0.167374	-115.924	6.07502	0.0555395	0.212384	-0.157366
GAPDHP33	0.259715	-62.3359	5.46425	0.0142462	0.226394	-0.13232
GAPDHP38	0.278453	46.4306	7.41487	0.00941714	0.223809	0.138338
GAPDHP39	0.130434	434.727	11.6018	0.0762073	0.114989	0.277345
GAPDHP40	0.172429	163.216	11.1719	0.0520182	0.098168	0.298508
GAPDHP42	0.195994	-85.0179	5.8129	0.0409348	0.201329	-0.168488
GAPDHP44	0.208532	63.7328	3.03411	0.0345227	0.216877	0.15161
GAPDHP45	0.208532	31.9909	0.719138	0.0335418	0.187854	0.183427
GAPDHP46	0.249942	25.3062	1.20936	0.0169011	0.209653	0.16028
GAPDHP47	0.0261775	222.951	0.0265301	0.211316	0.00201547	0.604804
GAPDHP49	0.21179	136.269	4.17133	0.0311646	0.187854	0.183541
GAPDHP52	0.184663	-60.5681	3.4114	0.0457795	0.252803	-0.110701
GAPDHP59	0.230338	63.6935	3.2483	0.0227419	0.159089	0.217825
GAPDHP60	0.0823202	425.069	14.8792	0.117299	0.00465891	0.560704
GAPDHP61	0.160209	170.79	7.48111	0.0598611	0.125216	0.258632
GAPDHP62	0.145466	66.7898	1.6308	0.0668594	0.130378	0.25117
GAPDHP63	0.224555	160.468	17.9027	0.026359	0.0969791	0.30029
GAPDHP65	0.00371505	1536.4	20.759	0.360743	2e-05	0.785254
GAPDHP69	0.00246299	132.365	-0.500321	0.393496	0.0380724	0.406217
GAPDHP70	0.0472823	216.605	2.91814	0.163835	0.0428644	0.395189
GAPDHP71	0.0718258	98.3852	2.054	0.12813	0.0353136	0.413024
GAPDHP72	0.0123136	212.162	3.55977	0.269828	0.00570996	0.548452
GAPDHP73	0.230338	28.4477	1.0063	0.0234772	0.132664	0.247937
GAPDHS	0.26655	18.6175	0.83957	0.0129039	0.289742	0.0671562
PGK2	0.309171	-15.5048	1.78548	0.00430968	0.449963	0.00255612
PGK1	0.0328902	690092	16960.9	0.193069	0.0230447	0.45244
PGK1P2	0.00192721	846.786	5.09967	0.410458	0.000136058	0.713523
PGAM1	0.0182305	84250.4	3179.51	0.240334	0.00391236	0.570506
PGAM1P11	0.0534736	142.856	0.533639	0.152389	0.186942	0.18718
PGAM1P5	0.195604	-95.9797	6.12048	0.0417224	0.118471	-0.270024
PGAM1P6	0.193801	63.3938	2.09262	0.0426656	0.267156	0.0920437
PGAM1P7	0.22147	-57.3041	4.43275	0.0281034	0.116611	-0.274125
PGAM4	0.0736776	153.448	7.11022	0.126136	0.0560154	0.367343
PGAM4P1	0.102268	-93.8692	2.87549	0.099142	0.132478	-0.248329
ENO3	0.32094	412.281	332.349	0.00072001	0.299853	0.0534641
ENO2	0.0019783	690820	860.624	0.407351	0.000245143	0.692137
ENO1	0.00156844	2.8906e+06	39836	0.428438	9.70528e-05	0.730453
ENO1_AS1	0.309171	-20.3283	4.26527	0.00416952	0.270998	0.0846609
ENO1_IT1	0.000631608	3561.23	-5.96661	0.512054	0.000403005	0.675207
ENO1P3	0.193801	40.9558	0.923098	0.0427057	0.196816	0.173943
ENO4	0.375883	-13.6467	64.1618	4.47545e-05	0.325062	0.0233905
PKM	0.0339407	1.43479e+06	65928.7	0.190377	0.0156312	0.480731
PKMP1	0.32094	-22.2945	10.1798	0.00115224	0.331688	-0.019158
PKMP2	0.21561	-40.8501	2.50097	0.0298903	0.218446	-0.145829
PKMP3	0.00245932	-3831.41	97.5507	0.393852	0.000340883	-0.681444
PKMP4	0.225148	34.8228	2.44112	0.0258425	0.20138	0.16676
PKMP5	0.32094	13.9375	6.19798	0.000950751	0.267156	0.0895623
PKMYT1	0.375883	460.643	298.17	0.000267485	0.196816	0.173981
PKLR	0.00865739	43127.7	16.7522	0.295562	0.0135276	0.490978
PDHA1	0.0173393	-29786.7	2812.69	0.243327	0.00937821	-0.515037
PDHB	0.00186809	-18186.9	1171.66	0.412765	0.000580451	-0.661395
DLAT	0.0182345	-22763	1560.21	0.240073	0.0108791	-0.505681
DLD	0.0654394	-64919.9	3891.69	0.135553	0.00557726	-0.550012
LDHAL6A	0.206377	-195.513	18.9279	0.0356984	0.167313	-0.207173
LDHAL6B	0.281659	106.877	13.11	0.00798225	0.252803	0.109824
LDHA	0.0435676	1.75536e+06	34668.8	0.170211	0.0426264	0.395857
LDHAL6EP	0.0335344	357.258	0.709096	0.191353	0.048014	0.383586
LDHAL6FP	0.278453	23.1937	1.20386	0.00940703	0.258706	0.103174
LDHAP2	0.130434	76.1996	2.15803	0.0761454	0.159612	0.217294
LDHAP3	0.0788379	-287.928	14.5875	0.120857	0.0310753	-0.425485
LDHAP4	0.02709	-2509.03	116.607	0.207631	0.0128758	-0.495211
LDHAP5	0.109624	184.403	5.03439	0.0936079	0.174693	0.20049
LDHAP7	0.00803434	-372.83	14.504	0.301074	0.00322514	-0.581422
LDHB	0.163591	207525	15456.9	0.0574812	0.0623271	0.356427
LDHBP1	0.281659	12.358	0.836736	0.00838368	0.227808	0.131291
LDHBP2	0.241943	-45.1631	4.28046	0.0199656	0.237372	-0.121543
LDHC	0.00095077	2572.01	-6.43618	0.466593	3.25925e-06	0.840205
ADH1B	0.375883	495.183	97.9234	0.00024865	0.114989	-0.278013
ADH1C	0.241943	-1406.88	66.7573	0.0201487	0.278878	-0.0766318
ADH4	0.0838762	115.624	0.774063	0.115411	0.0527579	0.373595
ADH5	0.00865739	-69835	4971.31	0.295955	0.002346	-0.597015
ADH5P4	0.227066	-43.3895	6.89633	0.0248536	0.278878	-0.0766318
ADH6	0.226772	-1930.04	175.611	0.0253416	0.220078	-0.144353
AKR1A1	0.00582893	258393	3283.87	0.327299	0.000123161	0.718646
ALDH2	0.311014	-15903.9	6409.78	0.00310564	0.300785	0.049677
ALDH3A2	0.00279959	-196430	6643.8	0.384778	0.0018614	-0.608822
ALDH1B1	0.0019783	-16216.7	740.335	0.407458	0.00024134	-0.692805
ALDH7A1	0.0167072	-64572.9	4164.58	0.246561	0.00491564	-0.55714
ALDH7A1P1	0.0503004	-213.237	11.5933	0.157374	0.0300973	-0.428381
ALDH9A1	0.0495341	-58021.3	3244.7	0.159073	0.00702875	-0.535532
ALDH3B1	0.00279959	95889.3	2206.78	0.383502	0.00119652	0.631767
ALDH3B2	0.375883	-2.48633	1.00646	0.000226583	0.300785	0.0430945
ALDH3A1	0.281659	-642.367	95.8509	0.00841919	0.262094	-0.098463
ACSS1	0.00194394	-78782.6	3435.2	0.409654	5.90903e-05	-0.746269
ACSS2	0.026985	70957.7	1355.92	0.208298	0.0127847	0.495656
GALM	0.016653	49907	1512.18	0.247094	0.00281799	0.588105
PGM1	0.00146754	172453	1791.85	0.43552	6.09252e-05	0.744933
PGM2	0.121015	-5676.31	843.736	0.0842724	0.0646792	-0.353086
PGM2L1	0.0136609	-24347.8	1120.44	0.262032	0.0586324	-0.362887
G6PC2	0.0113216	-648.206	17.5068	0.275145	0.0876714	-0.314717
G6PC3	0.281659	7490.51	2380.87	0.00823979	0.204046	0.164848
ADPGK	0.21024	19219.4	2951.28	0.0318269	0.0868792	0.315884
ADPGK_AS1	0.169598	216.05	6.98127	0.0538547	0.0425472	0.39608
BPGM	0.000948623	-21199.7	1152.41	0.467628	5.90903e-05	-0.746047
MINPP1	0.202563	6074.67	836.569	0.0387157	0.258706	0.103587
PCK1	0.281985	-41562.1	1928.41	0.00730385	0.125216	0.25841
PCK2	0.467431	114.546	1401.62	2.39842e-06	0.145277	0.2319
CS	0.230338	-11348.3	3838.67	0.0228624	0.210661	-0.159724
CSAD	0.0143265	37225.9	670.085	0.257985	0.0142879	0.487191
CSAG1	0.46608	-0.442203	1.20063	7.72356e-06	0.289742	-0.0625087
CSDC2	0.257089	-485.919	30.6432	0.0160477	0.1402	-0.238583
CSDE1	0.135775	119342	13220.5	0.0719659	0.14498	0.232791
CSE1L	0.203225	-15601.9	2535.82	0.0383755	0.166028	-0.208733
CSF1	0.0166684	159671	1198.62	0.246942	0.0177555	0.471598
CSF1R	0.0399546	279554	2734.04	0.177405	0.0048549	0.558254
CSF2	0.323102	34.0772	8.33026	0.000481241	0.216177	0.152658
CSF2RA	0.0161846	40556.3	500.084	0.24966	0.000101308	0.727557
CSF2RB	0.195604	15206.1	642.381	0.0417856	0.0693331	0.345734
CSF3	0.230338	-26.7995	2.13651	0.023092	0.204965	-0.164315
CSF3R	0.16261	62164.4	1560.28	0.0586576	0.0201954	0.463355
CSGALNACT1	0.047308	-11223.6	845.514	0.163639	0.0261767	-0.440856
CSGALNACT2	0.0838901	22227.8	1143.47	0.115224	0.0228244	0.453554
CSK	0.32094	5882.36	3370.78	0.00167059	0.267156	0.0899979
CSMD1	0.0977595	645.805	12.6726	0.103134	0.0696471	0.344398
CSMD2	0.271484	-699.432	86.5636	0.0115654	0.192843	-0.178436
CSMD3	0.212127	-2906.63	116.856	0.0310087	0.218149	-0.150158
CSNK1A1	0.124592	-19727.4	2398.32	0.0819395	0.0960546	-0.301404
CSNK1A1L	0.148718	-38.4797	2.03463	0.0652293	0.0998153	-0.296929
CSNK1A1P1	0.0832404	-123.798	6.20533	0.116281	0.118649	-0.269102
CSNK1D	0.000867892	100843	4158.18	0.476664	2.96632e-05	0.770774
CSNK1E	0.26655	24302	5919.39	0.0128507	0.411787	0.00556917
CSNK1G1	0.26655	2204.85	696.337	0.012924	0.155871	0.220762
CSNK1G2	0.00194728	86983.8	3162.78	0.409184	0.000166134	0.707062
CSNK1G2_AS1	0.0229106	804.583	2.72768	0.22172	0.0341872	0.41702
CSNK1G3	0.0575719	-13348.6	1120.53	0.146135	0.118649	-0.269771
CSNK2A1	0.315002	-6357.73	3088.82	0.00218942	0.212384	-0.157719
CSNK2A2	0.0254454	-37621.5	2809.61	0.21412	0.0376271	-0.407664
CSNK2A3	0.375883	7.28708	7.69804	0.000265245	0.28607	-0.0735131
CSNK2B	0.0184458	-14562.6	754.933	0.237619	0.00159164	-0.617956
CSPG4	0.00421037	-280634	7821.38	0.351302	0.0454004	-0.389174
CSPG4P11	0.315002	85.1684	27.6413	0.00243068	0.300785	-0.0483404
CSPG4P12	0.0759075	-483.618	21.9339	0.124009	0.165931	-0.209178
CSPG4P13	0.0873261	-1774.21	66.9603	0.112134	0.117208	-0.272444
CSPG4P8	0.0164509	519.239	2.00043	0.24805	0.015677	0.480265
CSPG5	0.32094	31.4809	9.83035	0.00136252	0.262094	0.0982402
CSPP1	0.020679	56782.2	1101.87	0.22911	0.00643095	0.541101
CSRNP1	0.309171	-8217.11	1835.17	0.0040982	0.262094	-0.0975719
CSRNP2	0.114758	-6566.2	943.031	0.0893331	0.0624269	-0.356204
CSRNP3	0.245381	-882.67	128.198	0.01816	0.325062	-0.0198263
CSRP1	0.0043377	-111213	6201.38	0.34909	0.000427297	-0.673202
CSRP2	0.22147	-12145	1100.11	0.0278092	0.225383	-0.136111
CSRP2BP	0.00791456	-13263	708.389	0.302281	0.00707617	-0.534641
CSRP3	0.281659	-190.819	10.3882	0.00817028	0.0602007	-0.360395
CST2	0.0574812	-472.288	13.83	0.146463	0.0121574	-0.498885
CST3	0.17456	-256161	26422.5	0.0511065	0.142731	-0.235242
CST6	0.127543	764.945	9.44944	0.0790805	0.137587	0.241702
CST7	0.278453	-3161.04	548.226	0.00878224	0.19654	-0.174427
CSTA	0.0145919	19376.9	131.355	0.256766	0.00148802	0.621297
CSTB	0.0255924	284162	4692.96	0.213253	0.00307933	0.583872
CSTF1	0.180951	2788.16	758.058	0.0472965	0.11034	0.283805
CSTF2	0.315002	-607.2	380.918	0.00204609	0.312378	-0.0280686
CSTF2T	0.00156844	-12500.8	1185.6	0.427931	0.00120921	-0.630653
CSTF3	0.045533	5739.67	753.532	0.167058	0.0795723	0.328136
CSTF3_AS1	0.146693	69.7936	1.11425	0.0662797	0.223286	0.139317
ACLY	0.0660452	150324	8863.75	0.134764	0.0419702	0.397416
ACO2	0.123989	40698.5	2601.79	0.0822319	0.0255767	0.444197
ACO1	0.0406174	-40153	2930.53	0.175772	0.0375541	-0.407886
IDH1	0.16261	65249.5	3356.72	0.0584312	0.0439857	0.39207
IDH1_AS1	0.46608	2.66151	16.0854	6.86254e-06	0.236644	0.123858
IDH2	0.0128247	222882	5054.77	0.265992	0.00926357	0.515706
IDH3B	0.0153651	-47313.4	3368.37	0.253001	0.0107529	-0.506795
IDH3G	0.0202704	-17769.1	2090.4	0.230304	0.00735103	-0.531968
IDH3A	0.199781	-5236.2	598.493	0.0396344	0.125216	-0.258855
OGDHL	0.171346	11626.9	457.842	0.0530142	0.025797	0.442861
OGDH	0.00349321	-136022	7710.85	0.365549	0.000857259	-0.64491
DLST	0.135194	-11823.5	2096.7	0.0731362	0.0352005	-0.414124
SUCLG1	0.309171	-3684.33	2703.59	0.00405809	0.289742	-0.0721765
SUCLG2	0.0631183	-20401.3	1831.2	0.138712	0.0618316	-0.357318
SUCLG2P2	0.02187	-123.067	4.52403	0.224635	0.015677	-0.480241
SUCLA2	0.00346101	-37470.3	1783.09	0.366675	0.00442771	-0.563823
SUCLA2_AS1	0.0257717	-315.054	13.1154	0.212806	0.0261507	-0.441301
SDHA	0.0509027	-102681	7563.22	0.156459	0.0751241	-0.335264
SDHAF1	0.299695	1977.1	811.337	0.00604268	0.254561	0.106705
SDHAF2	0.0190694	-4374.88	366.495	0.235232	0.0190012	-0.467365
SDHAP1	0.305279	-1675.08	673.786	0.00493007	0.267156	-0.0895523
SDHAP3	0.259817	-9486.96	1429.58	0.0136959	0.253962	-0.107151
SDHB	0.145744	17950.6	1728.09	0.0666898	0.11034	0.284251
SDHC	0.32094	1523.35	2130.85	0.000968263	0.258706	0.104032
SDHCP2	0.0604554	-48.4731	1.64266	0.141943	0.0556476	-0.367974
SDHCP3	0.191807	30.1518	0.78307	0.0435284	0.186942	0.187706
SDHD	0.0184458	-36881.6	2576.91	0.237907	0.00765868	-0.529517
SDHDP2	0.309171	10.3085	1.44103	0.00368708	0.21474	0.15364
SDHDP6	0.0402724	227.849	5.16475	0.176805	0.0259928	0.441747
FH	0.173748	-10887.3	1966.94	0.0515518	0.135363	-0.244598
FHAD1	0.0838901	7266.73	158.977	0.115275	0.0341872	0.41702
FHDC1	0.135775	-4098.13	228.467	0.0719019	0.0453901	-0.389397
FHIT	0.147967	-2461.87	293.068	0.065577	0.136175	-0.243262
FHL1	0.057969	383841	936.662	0.145291	0.134368	0.245489
FHL2	0.00972585	56572.5	1344.17	0.286224	0.00316249	0.582536
FHL3	0.00178467	-21731.7	903.887	0.418603	0.000731761	-0.652039
FHL5	0.0365426	-9672.02	334.44	0.184421	0.111315	-0.282023
FHOD1	0.00243478	-31252.8	1859.97	0.394949	0.000528134	-0.664737
FHOD3	0.32094	-1585.67	959.815	0.00166221	0.192843	0.177991
MDH1	0.208532	-16279.1	3806.32	0.0346042	0.190828	-0.18111
MDH1B	0.281659	584.091	106.952	0.0082101	0.289742	0.0643797
MDH2	0.187204	-72692.2	6886.82	0.0447741	0.165526	-0.211406
PC	0.00095077	193400	-223.002	0.466725	0.0018614	0.608599
PCA3	0.208532	-1026.66	81.8772	0.0328275	0.223286	-0.139898
PCAT1	0.0701288	767.036	31.5785	0.130291	0.0409088	0.399421
PCAT2	0.0703385	122.482	1.44402	0.12998	0.0699815	0.343827
PCAT6	0.0032715	20808.8	-46.4966	0.371324	0.00159218	0.617733
PCAT7	0.249942	452.22	40.1969	0.0169461	0.231936	0.127645
PCBD1	0.208532	26457.3	3329.54	0.0344422	0.124679	0.259746
PCBD2	0.259667	-2590.62	670.645	0.0145235	0.143387	-0.234574
PCBP1	0.0184458	-81661.4	5930.59	0.237633	0.00824705	-0.524616
PCBP1_AS1	0.0174721	40624.2	859.524	0.242743	0.0201954	0.463355
PCBP2	0.0301623	-84284.5	9574.78	0.199468	0.0114148	-0.502339
PCBP2P1	0.32094	-7.49892	2.25364	0.000735523	0.325062	-0.0227127
PCBP3	0.0062405	10922.2	-23.3125	0.32107	2.75786e-05	0.77367
PCBP4	0.247863	2666.75	477.284	0.0177898	0.209533	0.160838
PCCA	0.000631608	-52473.9	2033.29	0.516159	7.45918e-05	-0.73825
PCCA_AS1	0.375883	-11.5643	9.80592	0.000143985	0.275265	-0.079305
PCCB	0.0710057	-13215.8	1260.98	0.128946	0.116611	-0.27534
PCDH1	0.0105309	149865	429.144	0.281032	0.00493921	0.556695
PCDH10	0.0493341	-70195.8	2181.67	0.159476	0.000601442	-0.659522
PCDH11X	0.111026	314.469	-0.626496	0.0924195	0.0012041	0.63112
PCDH11Y	0.14842	151.795	2.45969	0.0653811	0.231936	0.127363
PCDH12	0.00529659	-60325.6	1855.89	0.334423	0.067427	-0.349076
PCDH15	0.268186	-1097.45	50.0031	0.0124844	0.255994	-0.105533
PCDH17	0.000710317	-85419.7	3004.04	0.488074	0.000189557	-0.701939
PCDH18	0.00457597	-9620.09	292.102	0.345439	0.00548517	-0.550903
PCDH19	0.000540233	-1085.77	28.1893	0.545384	3.25925e-06	-0.843841
PCDH20	0.00646035	-3717.36	98.095	0.318657	0.000424566	-0.673506
PCDH7	0.0517067	-7268.51	223.557	0.155025	0.000336914	-0.68189
PCDH9	0.00399648	-3225.9	81.6532	0.354331	0.00391236	-0.570347
PCDHA1	0.0788445	-226.981	8.65019	0.120774	0.0363767	-0.41074
PCDHA10	0.00499375	-2566.97	58.5398	0.339351	0.00824705	-0.524528
PCDHA11	0.0591516	-200.144	5.98297	0.143935	0.0288246	-0.431727
PCDHA12	0.0430802	-168.114	5.75065	0.171103	0.00170919	-0.613323
PCDHA13	0.00353577	-167.316	4.5677	0.364307	0.002346	-0.597049
PCDHA2	0.17456	-586.703	24.7644	0.051034	0.117208	-0.273052
PCDHA3	0.041642	-679.401	22.2123	0.173448	0.00524116	-0.553472
PCDHA4	0.168992	-1883.91	74.611	0.0547248	0.0281142	-0.434173
PCDHA5	0.156297	-858.985	33.5997	0.0620253	0.0101391	-0.510159
PCDHA6	0.0930549	-242.836	10.2574	0.107029	0.0685892	-0.347123
PCDHA7	0.0124706	-618.622	18.7756	0.268797	0.00148802	-0.621209
PCDHA8	0.00717226	-132.398	3.31519	0.310356	0.00228257	-0.599037
PCDHA9	0.00385662	-306.052	8.1353	0.357916	0.00567196	-0.548923
PCDHAC1	0.0106212	-425.409	13.4862	0.279809	0.000880349	-0.64386
PCDHAC2	0.00717226	-1224.61	40.2606	0.31065	0.00198306	-0.605481
PCDHB10	0.000631608	-14348.5	420.234	0.518268	4.86093e-05	-0.753175
PCDHB11	0.00615041	-2105.37	57.5095	0.322012	0.0152402	-0.482959
PCDHB12	0.00194728	-4462.15	119.473	0.409324	0.00469198	-0.560036
PCDHB13	0.0235295	-9788.63	316.344	0.21946	0.00707617	-0.534863
PCDHB14	0.00592058	-13751.1	453.542	0.325726	0.000677533	-0.654935
PCDHB15	0.00327037	-14207.1	357.739	0.37172	0.0685892	-0.347294
PCDHB16	0.00176413	-24277.3	706.652	0.419982	0.000190187	-0.701493
PCDHB17	0.315002	-117.752	25.6903	0.00281434	0.449963	0.0013366
PCDHB18	0.0326195	-542.442	22.7648	0.193737	0.0306911	-0.426821
PCDHB19P	0.121706	-154.961	9.11284	0.0837049	0.0934658	-0.304745
PCDHB2	0.00834724	-17369.5	509.588	0.298444	0.00181156	-0.610381
PCDHB3	0.000841192	-5212.19	130.898	0.480319	0.000248662	-0.691246
PCDHB4	0.0126273	-19295.7	480.245	0.26797	0.000327534	-0.682781
PCDHB5	0.00349068	-2223.41	71.9154	0.366043	0.00107859	-0.636
PCDHB6	0.145261	14681.2	220.452	0.0673058	0.135363	0.244375
PCDHB7	0.0837118	-9115.7	247.609	0.115846	0.0609437	-0.3591
PCDHB8	0.0215152	-3641.88	113.799	0.225944	0.0077133	-0.529072
PCDHB9	0.000631608	-13763.1	426.221	0.515675	0.000110726	-0.724215
PCDHGA1	0.00181301	-10029.6	234.958	0.416641	3.25925e-06	-0.85743
PCDHGA10	0.129687	-739.723	45.7703	0.07697	0.0665905	-0.350412
PCDHGA11	0.00870858	-10953.2	261.81	0.294936	0.0124256	-0.497439
PCDHGA12	0.100005	-4162.3	131.683	0.101417	0.0602628	-0.360214
PCDHGA2	0.00130425	-3093.93	75.4353	0.446967	0.000110726	-0.723424
PCDHGA3	0.0033648	-1747.97	43.2412	0.368437	0.0102628	-0.509489
PCDHGA4	0.0301623	1083.55	5.6603	0.199675	0.0522928	0.37514
PCDHGA5	0.0881474	1398.92	21.1259	0.111443	0.0704954	0.34217
PCDHGA6	0.210877	1236.94	49.8792	0.031514	0.250574	0.112497
PCDHGA7	0.143041	813.73	19.678	0.0683711	0.190409	0.181778
PCDHGA8	0.164054	202.185	6.96062	0.0570747	0.137587	0.241257
PCDHGA9	0.10896	-815.103	41.1277	0.0942638	0.167733	-0.206505
PCDHGB1	0.0467266	3079.44	-2.01263	0.165045	0.0222335	0.455781
PCDHGB2	0.0435676	7141.01	42.3988	0.170331	0.0114455	0.502117
PCDHGB3	0.0394675	1478.94	8.57331	0.178208	0.0511467	0.37759
PCDHGB4	0.230338	-997.945	61.3521	0.0230038	0.300785	-0.0418802
PCDHGB6	0.202183	-612.379	54.2947	0.0388944	0.168153	-0.205837
PCDHGB7	0.0544405	-18604.6	889.579	0.151392	0.0492764	-0.380932
PCDHGB8P	0.123426	-718.247	34.6591	0.0825107	0.289742	-0.0708399
PCDHGC3	0.0140979	-13838.1	789.957	0.259203	0.00602486	-0.544665
PCDHGC4	0.184455	310.815	9.82478	0.0459563	0.196816	0.173981
PCDHGC5	0.375883	-18.5059	18.9158	0.000146406	0.26333	-0.0962353
PCDP1	0.111148	9407.35	409.445	0.0922937	0.0856944	0.318111
PCED1A	0.220596	14984.2	2343.47	0.0284458	0.221625	0.142348
PCED1B	0.311397	1413.01	434.758	0.00299451	0.299853	0.0545779
PCED1B_AS1	0.0827499	10619.4	354.745	0.116885	0.0421639	0.396971
PCF11	0.133788	10696.3	1218.01	0.0743155	0.122192	0.26487
PCGEM1	0.137976	-414.756	14.3547	0.0704079	0.253962	-0.108836
PCGF1	0.180673	3651.9	864.448	0.0474479	0.104698	0.290934
PCGF2	0.0108435	-26335	2028.99	0.277782	0.00158869	-0.618178
PCGF3	0.0683416	-38961.7	2635.18	0.132394	0.0808111	-0.325463
PCGF5	0.196293	20220.7	2219.46	0.0406407	0.222687	0.141457
PCGF6	0.0568016	-4438.27	372.542	0.147565	0.0201481	-0.463578
PCGF7P.1	0.163362	-44.0134	1.96238	0.0577977	0.0797808	-0.32736
PCID2	0.00201592	-29062.8	1608.49	0.405966	0.000110726	-0.724215
PCIF1	0.0718258	19153.6	1447.92	0.128061	0.0114057	0.502562
PCLO	0.105453	-10797.5	813.455	0.0969303	0.105941	-0.289374
PCM1	0.0644199	-37649.4	3196.94	0.136833	0.015677	-0.480286
PCMT1	0.0255628	-28352.1	1931.33	0.213503	0.0113751	-0.502785
PCMTD1	0.00688281	51123.1	1062.92	0.31398	0.00781906	0.52818
PCMTD2	0.271484	-8493.56	2393.63	0.0115672	0.250471	-0.11272
PCNA	0.202963	-26657.2	2370.23	0.0385308	0.0874913	-0.314992
PCNP	0.309171	-6199.96	3779.43	0.0038681	0.272788	-0.0817555
PCNPP1	0.16261	219.157	11.7119	0.0584409	0.186942	0.186901
PCNPP5	0.247863	-37.7181	5.53887	0.0175803	0.26333	-0.0953443
PCNT	0.117855	8666.62	1168.53	0.0867891	0.0824365	0.322567
PCNX	0.244953	-5397.35	1389.79	0.0183475	0.132429	-0.249053
PCNXL2	0.117643	6189.69	609.37	0.0870051	0.0686929	0.346625
PCNXL3	0.00962198	44308.3	1922.56	0.286851	0.0249162	0.446202
PCNXL4	0.284736	-2074.17	1326.73	0.00717101	0.22606	-0.134997
PCOLCE	0.00407249	-61938.2	2174.52	0.353174	0.000398376	-0.675652
PCOLCE2	0.32094	5111.25	1986.67	0.00160096	0.291558	-0.0590332
PCOLCE_AS1	0.163587	-182.171	11.4198	0.0576776	0.24895	-0.114502
PCP2	0.0757862	1774.75	18.94	0.124327	0.0407431	0.400089
PCP4	0.375883	-19.239	16.6316	0.000190747	0.228599	0.130541
PCP4L1	0.101793	164.56	4.00333	0.099739	0.0475433	0.385096
PCSK1	0.0661425	1601.43	38.4445	0.134609	0.0868107	0.316106
PCSK1N	0.0171363	99056.5	-15.4145	0.244116	0.00316249	0.582313
PCSK4	0.00510992	12453	289.903	0.337091	0.00133568	0.625975
PCSK5	0.0843153	-34145.9	1265.16	0.114814	0.00159276	-0.61751
PCSK6	0.115346	-29822.8	2713.93	0.0885037	0.0794298	-0.32925
PCSK7	0.177826	21429.5	2454.14	0.0495111	0.165931	0.210292
PCSK9	0.220596	-225.373	8.37432	0.0284746	0.275476	-0.0790463
PCTP	0.00316327	22118.9	629.735	0.374101	0.000110726	0.724215
PCYOX1	0.0118225	-77454	4473.52	0.272271	0.00735103	-0.531968
PCYOX1L	0.0967989	-9310.2	598.812	0.103821	0.0154886	-0.481845
PCYT1A	0.0235295	15173	2189.18	0.219743	0.0155663	0.481399
PCYT1B	0.305279	-60.9386	9.68095	0.00501792	0.292852	0.0585877
PCYT2	0.26655	-10731	1549.98	0.0128225	0.325062	-0.0216084
XPC	0.130252	12851.2	1104	0.0764744	0.130378	0.251058
G6PD	0.209884	-46988.9	3178.46	0.0320172	0.289742	-0.0652707
PGLS	0.111422	24571.9	2282.56	0.0915919	0.0364608	0.410337
H6PD	0.00146214	504294	4175.6	0.436056	6.22176e-06	0.815104
PGD	0.315002	-14309.3	3312.95	0.00229709	0.289742	-0.065048
PGDP1	0.160209	-27.8746	1.24444	0.0599578	0.168779	-0.204758
RPE	0.0235301	15120.8	896.147	0.219213	0.0255767	0.44442
RPE65	0.315002	-22.3892	5.96944	0.00227142	0.299853	-0.0537107
RPEP3	0.14431	42.858	0.766945	0.0677214	0.124419	0.260575
RPEP4	0.0808958	236.236	5.05567	0.118725	0.0797808	0.327022
TKT	0.375883	-2714.12	6414.67	4.72481e-05	0.201329	-0.168857
TKTL1	0.224555	670.25	5.99984	0.0269086	0.272944	0.0806506
TKTL2	0.375883	-1.68046	1.37811	5.02905e-05	0.277017	0.0774368
TALDO1	0.208532	55204.2	4643.37	0.0339006	0.124419	0.260637
RPIA	0.00146001	-7363.55	665.63	0.436926	0.000245663	-0.691691
SHPK	0.00398124	-4119.26	227.159	0.355037	0.00389985	-0.570729
SHPK.1	0.0808958	97.2597	2.04165	0.118716	0.0794675	0.328618
DERA	0.0132512	68134.9	1356	0.263966	0.000245143	0.692137
RBKS	0.0183022	14865.5	640.002	0.238599	0.00588587	0.546225
PRPS2	0.0668306	-24935.5	1581.67	0.133991	0.0352133	-0.413901
PRPS1	0.181052	-11658	1673.8	0.0471853	0.109195	-0.285587
PRPS1P2	0.045533	-1464.88	59.9921	0.166993	0.123205	-0.262865
RGN	0.284736	-2745.28	665.173	0.00707479	0.268022	-0.0871019
IDNK	0.0444068	-9936.38	432.415	0.168858	0.0763631	-0.333482
GLYCTK	0.00834724	21427.5	505.807	0.298287	0.0048589	0.558031
GLYCTK_AS1	0.230338	73.8065	3.65107	0.0228704	0.17697	0.197237
GUSB	0.0362413	-88281	5508.99	0.185052	0.00990073	-0.511473
GUSBP1	0.0643095	-6203	418.062	0.137163	0.114854	-0.278236
GUSBP2	0.309171	-164.963	73.1639	0.00360997	0.312378	-0.0314101
GUSBP3	0.0196447	-1665.72	70.0388	0.232363	0.0880319	-0.31321
GUSBP4	0.247863	-174.475	19.6732	0.0177443	0.192544	-0.17955
GUSBP5	0.0838717	831.186	19.0809	0.115674	0.0952596	0.302295
GUSBP8	0.145261	42.9641	0.756128	0.0672955	0.221625	0.142652
GUSBP9	0.0707996	611.95	24.5291	0.129172	0.0656585	0.351749
KL	0.0495341	-45855.3	1781.68	0.159003	0.0416381	-0.398085
KLB	0.32094	-20.2396	8.57844	0.00126281	0.218345	0.146581
KLC1	0.32094	1279.66	690.114	0.00165645	0.312378	0.0289597
KLC2	0.0544405	11045.9	894.843	0.151224	0.0751241	0.335487
KLC3	0.281659	-615.201	59.5695	0.00737828	0.161315	0.216108
KLC4	0.219506	13123.1	1294.54	0.0287197	0.0700711	0.343284
KLF1	0.309171	-36.772	5.41945	0.00383708	0.449963	0.00245591
KLF10	0.0137638	99052.1	822.778	0.261237	0.0524805	0.374471
KLF11	0.0162459	20040	594.869	0.249368	0.00574962	0.547784
KLF12	0.00539746	-22966.8	1206.41	0.332827	0.00409448	-0.567833
KLF13	0.0788445	-25003.1	4407.02	0.120764	0.0706024	-0.341725
KLF15	0.375883	1353.64	1269.97	0.000223649	0.308193	0.0389842
KLF16	0.00480717	45385.7	853.727	0.342142	0.000766685	0.649588
KLF17	0.274496	-119.697	8.20647	0.0110023	0.300785	-0.0485719
KLF17P1	0.00860043	599.796	0.684468	0.296388	0.00230552	0.598352
KLF2	0.0207878	-113106	3863.64	0.228551	0.0261507	-0.441301
KLF2P2	0.135775	-90.1121	5.1483	0.0719377	0.11779	-0.270819
KLF3	0.208532	7096.61	1178.12	0.0334318	0.123339	0.262642
KLF3P1	0.130252	148.748	1.93489	0.0764723	0.158303	0.219022
KLF4	0.274931	10983	1335.31	0.00971461	0.165931	0.210069
KLF5	0.247863	-5032.62	537.565	0.0179084	0.125604	-0.257519
KLF6	0.244754	188668	19212	0.0186669	0.289742	0.0706171
KLF7	0.0316801	-71241.4	3590.05	0.19589	0.121787	-0.265538
KLF7_IT1	0.197274	283.468	11.0986	0.0403592	0.161931	0.214747
KLF8	0.281659	-4317.68	883.093	0.00778657	0.26333	-0.0951215
KLF9	0.0033543	-246139	7459.57	0.368756	0.152011	-0.224772
KLHDC1	0.0867127	-3806.75	241.488	0.112867	0.0999168	-0.296726
KLHDC10	0.204857	18824.8	3411.16	0.037539	0.168543	0.205168
KLHDC2	0.32094	-2248.53	2069.02	0.000627354	0.300785	0.0505681
KLHDC3	0.00150236	-46289.7	3010.13	0.433612	4.36463e-05	-0.757185
KLHDC4	0.00325452	46268.4	1046.12	0.372119	5.15635e-05	0.750725
KLHDC7A	0.00399648	48857.1	459.731	0.354249	0.000580451	0.661395
KLHDC7B	0.00359721	263376	-846.334	0.362852	3.12509e-05	0.767878
KLHDC8A	0.00609022	-9096.91	231.418	0.32274	0.0507205	-0.378258
KLHDC8B	0.0264494	-15248.2	1065.95	0.210135	0.0352389	-0.413455
KLHDC9	0.00467313	9879.74	192.708	0.344189	0.00119652	0.631767
KLHL10	0.126155	-412.443	11.7112	0.0806996	0.124419	-0.260996
KLHL11	0.309171	86.6881	31.6732	0.00428394	0.299853	0.0543551
KLHL12	0.159999	8213.36	1443.54	0.0602083	0.0934658	0.304522
KLHL13	0.0513902	-8307.04	402.262	0.155674	0.0309337	-0.426153
KLHL14	0.159533	-4545.04	161.255	0.0605906	0.00911091	-0.517488
KLHL15	0.00603473	-3947.46	335.737	0.323719	0.000464549	-0.66986
KLHL17	0.0145736	12421.5	499.411	0.256935	0.0048549	0.558254
KLHL18	0.272003	1124.37	358.82	0.0112967	0.312378	0.0274003
KLHL2	0.11873	-17302.9	1241.68	0.08623	0.0902458	-0.309869
KLHL20	0.177826	-3277.15	733.924	0.0494331	0.111227	-0.282246
KLHL21	0.00181301	84617.6	1223.96	0.415231	4.03349e-05	0.759635
KLHL22	0.0324742	-9463.36	984.827	0.194173	0.0234394	-0.451103
KLHL22_IT1	0.227778	-158.299	15.3473	0.0244673	0.192843	-0.178882
KLHL23	0.0094383	-19400.9	674.75	0.288597	0.0604588	-0.359769
KLHL24	0.202963	-9613.84	2035.58	0.0385344	0.147153	-0.229673
KLHL25	0.0409988	3673.45	161.316	0.175032	0.0491032	0.381377
KLHL26	0.32094	-163.542	366.623	0.000546798	0.199431	0.170417
KLHL28	0.0448643	-6371.65	500.108	0.168247	0.124419	-0.260192
KLHL29	0.309171	-1026.96	612.534	0.00353995	0.308193	0.0400981
KLHL2P1	0.00271617	4278.41	-6.96225	0.387071	0.00172848	0.612832
KLHL3	0.0194733	6417.47	100.309	0.233177	0.0222844	0.455558
KLHL30	0.205028	-376.596	31.8433	0.0373535	0.17256	-0.201827
KLHL31	0.00575097	-2670.11	111.946	0.328524	0.00976443	-0.512587
KLHL32	0.000631608	-5553.56	155.889	0.506453	0.000387904	-0.676766
KLHL33	0.32094	-10.3955	3.08152	0.000983906	0.312121	-0.0352757
KLHL34	0.153567	52.0252	0.725977	0.0631524	0.125444	0.257894
KLHL35	0.039147	4286.48	23.3977	0.178933	0.0154886	0.481845
KLHL36	0.305279	-4571.77	3062.03	0.00529656	0.449963	0.00155937
KLHL38	0.114787	-137.339	6.52544	0.0892484	0.122192	-0.264831
KLHL4	0.153549	-32784.2	1180.82	0.0632475	0.00491564	-0.557314
KLHL41	0.168992	-95.2841	8.56137	0.0548458	0.10431	-0.291602
KLHL42	0.0416884	10448.1	718.984	0.173193	0.140166	0.239029
KLHL5	0.00628756	-22910.5	1430.94	0.32045	0.00349171	-0.577189
KLHL6	0.0668306	20295.5	365.219	0.134005	0.00344932	0.577857
KLHL6_AS1	0.00181301	4851.04	-21.3364	0.415221	0.000489314	0.66741
KLHL7	0.00209504	-18886.8	953.983	0.403948	0.0017938	-0.610827
KLHL7_AS1	0.0137638	-1329.93	54.253	0.261069	0.022721	-0.453999
KLHL8	0.284736	-1800.71	1168.37	0.00713671	0.308593	-0.0376476
KLHL9	0.000628187	-38165.4	1691.59	0.536547	2.47161e-05	-0.778348
KLK1	0.270709	-178.195	10.8822	0.0117446	0.312378	-0.0275771
KLK10	0.32094	-14.4374	2.90216	0.00170945	0.325062	-0.0219167
KLK11	0.212127	-392.777	11.1879	0.0310628	0.253962	-0.107617
KLK13	0.281659	64.6405	3.41747	0.00847783	0.186942	0.186286
KLK14	0.105453	164.299	6.78901	0.0968787	0.0693331	0.345289
KLKB1	0.107553	-4686.76	230.594	0.0956939	0.11247	-0.280686
KLLN	0.274496	-327.289	71.4	0.0107842	0.449963	0.00155937
KLRAP1	0.106762	6696.92	160.031	0.0961193	0.116939	0.273558
KLRB1	0.223128	-1135.56	209.754	0.0274272	0.0751241	-0.335487
KLRC1	0.143803	881.593	38.326	0.0680075	0.169268	0.204055
KLRC2	0.375883	21.1275	21.8521	5.61003e-05	0.14498	0.232569
KLRC3	0.281659	30.6261	2.98614	0.00775428	0.292852	0.058272
KLRC4	0.281659	62.4755	5.22228	0.00754731	0.192843	0.178576
KLRC4_KLRK1	0.311014	-53.8859	12.0999	0.00319735	0.299853	-0.055141
KLRD1	0.0240474	-3010.93	178.071	0.217444	0.00422647	-0.566274
KLRF1	0.167543	-687.623	49.6244	0.0554354	0.218345	-0.146581
KLRF2	0.0475656	497.642	3.29974	0.162677	0.0849713	0.319225
KLRG1	0.17456	710.058	67.2414	0.0507969	0.113366	0.279795
KLRG2	0.0184559	2228.29	-11.0798	0.23717	0.000635142	0.65756
KLRK1	0.281659	239.329	24.9498	0.00851489	0.225383	0.136333
UGT2A3	0.138068	-57057.3	5624.51	0.0703035	0.0908481	-0.308755
UGT2B17	0.375883	13.0216	9.10159	0.000126535	0.272788	0.0813729
UGT2B11	0.0258696	1405.39	29.648	0.212327	0.0220815	0.45645
UGT1A6	0.229428	-19340.1	1038.52	0.0239196	0.300785	-0.0467811
UGT1A4	0.196293	105.038	2.17403	0.040705	0.125444	0.25784
UGT1A10	0.00147264	11398.8	-54.8225	0.435051	2.4219e-05	0.77914
UGT1A13P	0.00729251	499.269	-2.17565	0.308787	0.000110726	0.724286
UGT2B10	0.0728588	124.026	0.917087	0.126935	0.0795723	0.328191
UGT2B7	0.309569	-23287.9	6747.09	0.00346671	0.289742	-0.0686122
UGT1A8	0.32094	-736.561	333.662	0.00147244	0.398511	0.00846514
UGT1A7	0.0363774	1745.72	3.39911	0.184771	0.0951085	0.302663
UGT2B4	0.375883	-1.01956	0.828349	6.95617e-05	0.411787	0.00571419
UGDH	0.16261	16440.9	1217.88	0.0586763	0.0522851	0.375362
UGDH_AS1	0.0278988	2344.25	40.9808	0.205393	0.0315406	0.423703
UGP2	0.16261	24101.5	3386.05	0.0586179	0.132478	0.248385
CRYL1	0.234029	41904	4021.78	0.0214897	0.300785	0.0485632
XYLB	0.0169327	6495.32	108.273	0.245225	0.00018664	0.702607
AKR1B1	0.309171	-60562.2	9495.32	0.00410427	0.153241	0.223658
AKR1B10	0.116732	4037.92	35.7958	0.0875761	0.227702	0.131655
AKR1B10P1	0.271646	16.5619	0.851453	0.011385	0.131198	0.250239
AKR1B15	0.0289871	598.662	-1.71734	0.202709	0.114989	0.277765
AKR1B1P1	0.375883	1.86797	1.22977	0.000103798	0.398511	0.0090626
AKR1B1P7	0.249942	-51.7163	3.23219	0.0169102	0.292852	-0.0576508
DCXR	0.120981	17299.8	1166.64	0.0843571	0.0617295	0.357764
SORD	0.26655	1325.39	458.752	0.0127139	0.300785	0.0514592
DHDH	0.0153651	7792.1	9.71924	0.25306	0.00272953	0.589887
FGGY	0.0281018	31354.6	619.512	0.204559	0.0134031	0.492092
MPI	0.0603988	32779.8	1614.56	0.142301	0.0217161	0.457563
PMM2	0.000631608	18340.7	301.523	0.516446	3.25925e-06	0.858767
PMM1	0.164054	13118.9	964.749	0.0571437	0.0449183	0.390288
GMPPB	0.0318646	111.902	0.664917	0.19532	0.00647774	0.540693
GMPPA	0.000632183	78969	1529.56	0.497373	5.71372e-06	0.819114
GMDS	0.113584	-4469.28	684.401	0.0901056	0.0562909	-0.366897
GMDS_AS1	0.270709	-1059.88	302.158	0.0116638	0.187761	-0.184228
FPGT	0.0184458	6630.39	453.657	0.237808	0.00384089	0.57162
FPGT_TNNI3K	0.375883	61.3146	41.8663	0.000214672	0.300785	-0.0452217
ENOSF1	0.179166	-46722.9	4350.96	0.047954	0.119272	-0.267766
PFKFB1	0.000979808	755.651	2.31654	0.46471	3.3745e-05	0.765067
PFKFB2	0.0495341	14879.7	426.574	0.158924	0.00983775	0.512141
PFKFB3	0.0082407	341978	2876.27	0.299387	0.00177525	0.611495
PFKFB4	0.00146001	92023.9	206.357	0.43849	0.00245552	0.594788
KHK	0.0627675	108906	1049.81	0.139287	0.0878491	0.314324
GALK1	0.21561	13924.8	1639.47	0.0299314	0.0903662	0.309646
GALT	0.205702	-3258.98	477.457	0.036167	0.216877	-0.151482
GALE	0.000631608	238645	552.024	0.521969	4.45252e-05	0.756294
GLB1	0.0905617	23922.9	1423.79	0.109656	0.042944	0.394966
GLB1L	0.230125	16138.1	2579.4	0.0236506	0.100867	0.295612
GLB1L2	0.0267344	73316.3	491.67	0.209052	0.006522	0.54021
GLB1L3	0.208532	-107.69	7.26462	0.0343508	0.258706	-0.101359
LCT	0.230338	-39.313	3.27501	0.0225057	0.231936	-0.127261
LCTL	0.178858	-165.483	12.2777	0.0481631	0.187706	-0.184674
B4GALT1	0.258093	41196	5878.91	0.0146736	0.127372	0.254623
B4GALT2	0.135194	30635.9	1618.04	0.0731544	0.126671	0.255736
GLA	0.305279	3936.58	1023.53	0.00528976	0.228913	-0.129873
MGAM	0.0332756	-47591.8	1414.29	0.192111	0.10295	-0.293384
GAA	0.0192871	168465	6000.81	0.233976	0.0236107	0.449989
GANC	0.0106197	9645.82	476.806	0.280302	0.00498549	0.556026
SIAE	0.275786	8071.94	2213.59	0.00961447	0.213876	0.155937
SIAH1	0.208532	-2610.03	497.871	0.0342288	0.059778	-0.361105
SIAH2	0.0906492	16622.7	1030.25	0.109455	0.0338712	0.417688
SIAH2_AS1	0.165914	344.207	16.1556	0.0563372	0.135363	0.244598
SIAH3	0.0604554	139.851	0.69049	0.141855	0.0527579	0.373688
SIDT1	0.093909	2622.79	113.493	0.106075	0.0292164	0.430831
SIDT1_AS1	0.278453	17.7901	1.22056	0.0091069	0.289742	0.0712692
SIDT2	0.155179	12908.3	2051.12	0.0625206	0.0903662	0.309646
SIGIRR	0.195241	21097.4	1803.64	0.0422593	0.133783	0.246826
SIGLEC1	0.129687	64302.7	728.116	0.0768559	0.00283681	0.587659
SIGLEC10	0.227066	8841.08	625.372	0.025105	0.155871	0.220762
SIGLEC11	0.0912518	1217.26	17.0034	0.108998	0.0433319	0.394075
SIGLEC12	0.274128	612.628	41.7157	0.0110738	0.260228	-0.100245
SIGLEC14	0.281659	858.038	97.7776	0.00820139	0.196816	0.173758
SIGLEC15	0.0106151	-10028.2	275.379	0.280536	0.00075569	-0.650257
SIGLEC16	0.0182345	2924.82	16.517	0.239039	0.00130841	0.627089
SIGLEC17P	0.227778	262.076	23.169	0.024372	0.289742	0.0630431
SIGLEC18P	0.195604	170.309	3.44065	0.0418192	0.132889	0.247658
SIGLEC19P	0.233145	123.328	2.57546	0.0219147	0.0246962	0.447069
SIGLEC20P	0.305279	8.47444	0.658788	0.00473869	0.228913	0.129942
SIGLEC22P	0.0700719	556.197	5.57694	0.130552	0.00578466	0.547338
SIGLEC5	0.0177716	759.739	1.83281	0.241801	0.0135377	0.490756
SIGLEC6	0.00885733	-313.042	10.6529	0.293663	0.00161665	-0.616688
SIGLEC7	0.173748	3904.43	94.5513	0.0515386	0.0712489	0.340833
SIGLEC8	0.247863	-1921.14	202.796	0.0178866	0.180347	-0.194253
SIGLEC9	0.107588	13552.3	205.046	0.0956045	0.0271786	0.437514
SIGMAR1	0.233489	-9977.44	1638.01	0.0215931	0.289742	-0.071731
SIK1	0.375883	-2520.9	2599.4	0.000111604	0.296913	-0.0561373
SIK2	0.060293	-20285.1	1918.92	0.142472	0.0562909	-0.366897
SIK3	0.00592113	-15497.8	1291.77	0.325578	0.00110133	-0.635109
SIK3_IT1	0.257089	130.081	9.24575	0.0159476	0.225383	0.135665
SIKE1	0.367466	-630.756	1079.73	0.00029557	0.187761	0.184228
SIL1	0.126843	-17644.2	2704.32	0.0799196	0.0795723	-0.328136
SIM1	0.000631608	-11198.3	306.353	0.516675	7.45538e-05	-0.738472
SIM2	0.0168013	-875.59	55.3404	0.245859	0.0129432	-0.494765
SIMC1	0.309569	400.115	268.573	0.00335657	0.300785	-0.0425485
SIN3A	0.0938885	-17477.9	1977.14	0.106366	0.0433319	-0.393852
SIN3B	0.132668	-18172	2999.87	0.0748894	0.111138	-0.282914
SIPA1	0.213135	-29189.5	4724.25	0.0305367	0.211521	-0.159056
SIPA1L1	0.0326195	-40948.4	2461.42	0.193763	0.0016996	-0.613723
SIPA1L2	0.0334707	-29972.6	1556.95	0.191541	0.0755685	-0.334596
SIPA1L3	0.262129	19639	2876.6	0.0134289	0.0898642	0.310314
SIRPA	0.0746937	110353	5053.45	0.125133	0.0787913	0.330363
SIRPAP1	0.00271491	2641.72	37.552	0.387308	0.0025023	0.593897
SIRPB1	0.093909	20395.9	63.8207	0.105963	0.0628251	0.355536
SIRPB2	0.0798025	17076.1	212.763	0.119702	0.000482761	0.668524
SIRPB3P	0.16261	1641.68	5.08211	0.0587728	0.00158869	0.618231
SIRPD	0.126026	394.944	4.80679	0.080887	0.100128	0.296313
SIRPG	0.375883	217.332	223.791	0.000122005	0.300785	0.0456672
SIRT1	0.127486	-6902.32	1007.62	0.0791961	0.0864374	-0.31722
SIRT2	0.225148	10671.2	2439.53	0.0257709	0.142595	0.235465
SIRT3	0.0485533	12006.8	847.535	0.161114	0.00408146	0.568056
SIRT4	0.034871	-1191.11	58.7496	0.188728	0.0514945	-0.376922
SIRT5	0.0905617	-4749.75	649.377	0.109597	0.0903662	-0.309423
SIRT6	0.137701	5652.36	1040.09	0.0708509	0.0699692	0.343952
SIRT7	0.208532	5788.11	1180.46	0.0330123	0.153519	0.223212
SIT1	0.375883	-197.178	197.608	0.000200363	0.312378	-0.029628
SIVA1	0.319539	-1788.82	1551.58	0.00187563	0.434213	-0.00445534
SIX1	0.00669808	-4794.91	177.207	0.316454	0.00107485	-0.636222
SIX2	0.00567317	13218.8	15.9316	0.329399	0.000122562	0.719315
SIX3	0.320911	8.77047	1.42407	0.00182423	0.254561	0.106675
SIX4	0.00388856	-553.35	18.6339	0.357385	0.000123161	-0.718298
SIX5	0.274496	-1471.32	281.687	0.0108293	0.218149	0.149477
MIOX	0.135775	88104.6	1248.87	0.0717922	0.118382	0.270216
ENPP1	0.173428	-17141.3	784.853	0.0517349	0.117208	-0.273112
ENPP3	0.00730464	-230757	8868	0.308579	0.0107908	-0.506349
GBA3	0.0790419	-47349.2	1477.45	0.120414	0.0677426	-0.34863
GYS2	0.00156844	2982.02	-2.60055	0.428423	0.000114872	0.721319
GYS1	0.00376031	159389	1432.99	0.359359	0.00350304	0.576966
GYG1	0.0838717	-15904.1	1532.56	0.115634	0.05695	-0.365338
GYG2	0.301128	-821.06	91.6994	0.00586368	0.176588	0.19804
GBE1	0.0383925	43089.7	1702.14	0.180326	0.0227087	0.454222
PYGL	0.281659	7872.98	2174.51	0.0085035	0.132478	0.248608
PYGM	0.0168013	-4631.89	159.373	0.245823	0.0341872	-0.41702
PYGB	0.32094	-13788.1	6774.21	0.00136975	0.292852	-0.0570283
AGL	0.0149282	9878.17	726.925	0.25533	0.00385323	0.571397
AMY2B	0.113499	10171.5	259.253	0.0902133	0.192843	0.179105
TREH	0.0266182	14021.8	29.3796	0.209367	0.0148922	0.484518
CHIAP3	0.0346582	125.532	0.403194	0.189221	0.0190012	0.467409
CHIT1	0.190916	-1642.32	108.656	0.04388	0.222687	-0.141457
HEXA	0.284736	-5988.24	1650.38	0.0070504	0.192843	0.177991
HEXA_AS1	0.00130425	1350.35	7.09704	0.44718	0.000571988	0.662063
HEXB	0.026985	-108948	7118.84	0.20829	0.0155663	-0.481399
NAGK	0.257089	14034.6	2760.77	0.0153388	0.206956	0.162174
AMDHD2	0.000631608	44950.5	388.327	0.52194	3.37486e-05	0.764536
GNPDA1	0.224555	10725.3	2091.14	0.0263703	0.140166	0.239029
GNPDA2	0.00618863	-9931.34	698.27	0.32159	0.00158027	-0.618624
GFPT2	0.195604	23513.5	1250.4	0.0418304	0.112025	0.281132
GFPT1	0.00292411	160682	2083.85	0.380206	7.88417e-06	0.809981
GNPNAT1	0.00541421	-8315.51	381.844	0.332538	0.00120908	-0.630876
PGM3	0.020847	-17531.5	1377.48	0.22831	0.0213435	-0.4589
GALK2	0.0726723	8539.59	444.204	0.127143	0.122462	0.264424
UAP1	0.0269938	32674	1213.82	0.207905	0.0058503	0.54667
UAP1L1	0.206377	8624.49	918.994	0.0357992	0.0868107	0.316552
GNE	0.0060507	-27804.4	1372.35	0.323347	0.00470668	-0.559813
RENBP	0.277507	-7224.25	1296.42	0.00949774	0.130285	-0.251504
NANS	0.219441	-4404.52	963.476	0.0288363	0.182053	-0.191357
NANP	0.168992	-1546.27	192.833	0.0546103	0.109063	-0.28581
NPL	0.107647	78165.1	1029	0.0954796	0.00121343	0.630431
NPLOC4	0.00181301	110382	3923.3	0.41638	0.000133988	0.714191
CMAS	0.00431496	57646.5	1379.58	0.349677	4.00142e-05	0.760304
CYB5R1	0.32094	-1293.85	2207.42	0.000638916	0.276494	0.0781912
CYB5R3	0.0301623	937688	12038.5	0.199766	0.0020803	0.603476
CYB5R2	0.320911	-838.22	210.753	0.00184252	0.180347	0.193807
CYB5RL	0.0475363	2376.47	106.579	0.162965	0.0261897	0.440633
CYB5R4	0.236663	-7115.99	1008.53	0.0208253	0.165931	-0.209624
UXS1	0.0468312	-30676.9	2121.06	0.164712	0.0191074	-0.46692
ACACA	0.134317	13937	1151.71	0.0737181	0.0969791	0.30029
ACACB	0.0856798	27551.5	1173.51	0.113612	0.0934658	0.304745
ACYP2	0.224555	1235.65	388.362	0.0263883	0.167733	0.206505
ACYP1	0.0108594	-7504.99	411.561	0.277598	0.0092139	-0.516597
ACOT12	0.0548452	307.251	0.512109	0.15043	0.127901	0.253575
LDHD	0.039147	11821.6	196.953	0.178978	0.0016255	0.616396
GLO1	0.00130425	-61908.9	2990.24	0.448086	7.2227e-05	-0.739364
HAGH	0.00699651	138951	1605.74	0.312688	0.00208161	0.603253
HAGHL	0.216602	-10596.1	905.333	0.0296369	0.125604	-0.257519
GRHPR	0.0106197	-48218.6	2763.87	0.280324	0.000145623	-0.711295
ME2	0.46608	-208.022	1647.25	4.10438e-06	0.192283	-0.179996
ME3	0.0191425	21537.3	770.096	0.234652	0.0279681	0.435064
ME1	0.32094	-1574.21	622.327	0.00115247	0.200094	-0.169971
ACAT2	0.171628	-2775.07	293.048	0.0523868	0.0880319	-0.31321
ACAT1	0.0125397	-67058.1	3535.35	0.268419	0.000747876	-0.651148
MCEE	0.126937	2165	379.807	0.0798155	0.154486	0.222099
HAO2	0.171346	4880.64	105.443	0.052633	0.166448	0.208064
CAT	0.135194	37241.2	2915.67	0.0728416	0.0613357	0.358432
CATSPER1	0.182533	1117.67	36.6544	0.0465802	0.107958	0.287147
CATSPER2	0.0070684	18894.8	143.065	0.311815	0.0114057	0.502562
CATSPER2P1	0.000631608	9986.97	11.2693	0.503774	0.00159164	0.617956
CATSPER3	0.00159847	-2584.24	76.9549	0.426782	0.00230552	-0.598575
CATSPERB	0.214459	-307.519	32.2755	0.0301384	0.236644	-0.124081
CATSPERD	0.259817	44.194	3.7677	0.0139076	0.186942	0.187124
CATSPERG	0.00125215	6856.74	69.8554	0.451509	1.9714e-05	0.789932
PGP	0.0100452	22263.5	645.362	0.2841	0.00557726	0.550012
PGPEP1	0.0182345	150316	2205.51	0.240141	0.0140651	0.488082
PGPEP1L	0.311014	21.9268	3.31043	0.00320914	0.228913	0.129485
AGXT	0.00445458	12662.2	-42.0534	0.347431	0.00128169	0.628203
AGXT2	0.108815	58010.9	943.645	0.0944748	0.113815	0.27935
GLUL	0.375883	36962.9	25695.3	0.000212366	0.277017	-0.0773001
GLULP4	0.0474568	191.78	2.6094	0.163136	0.0029839	0.585654
SHMT2	0.00394165	535829	4319.97	0.356282	0.000753183	0.650702
SHMT1	0.0182345	-96254.2	5761.72	0.23983	0.00567196	-0.548898
SHMT1P1	0.0953578	127.428	0.922219	0.1047	0.0248522	0.446542
GLDC	0.168992	6543.07	694.922	0.0548196	0.186942	0.18601
GLDCP1	0.164054	-45.9197	2.64767	0.0572385	0.272944	-0.0808216
AMT	0.00351067	34520.8	261.206	0.364973	0.00470668	0.559813
GCSH	0.0413731	4268.74	158.506	0.173954	0.00824705	0.524839
GCSHP4	0.0559654	76.424	0.274668	0.148569	0.177582	0.196104
GCSHP5	0.239399	61.0248	6.39573	0.02048	0.222927	0.140789
HYI	0.00279959	33394.8	352.769	0.384539	0.000797843	0.648029
HYI_AS1	0.216814	176.536	16.4787	0.0295544	0.169859	0.203609
HOGA1	0.22147	11837.1	920.514	0.0279301	0.114989	0.278013
AFMID	0.0216142	34878.4	831.501	0.22542	0.0133684	0.492315
ACSS3	0.093909	-23084.6	1252.34	0.106092	0.176019	-0.198931
BCKDHA	0.206303	-123.553	13.2898	0.0359253	0.218149	-0.149699
BCKDHB	0.0163649	-11416.5	771.019	0.248684	0.0105669	-0.507909
DBT	0.375883	538.703	1167.56	0.000187656	0.226394	0.133437
ACADS	0.257089	-8300.82	2020.39	0.0154035	0.398511	-0.00712854
ACADSB	0.127878	-11752.7	1256.01	0.0787755	0.045886	-0.38806
ACOX3	0.0151601	22225.1	552.934	0.254146	0.00123439	0.629762
ACOX1	0.00246299	45478.6	1316.07	0.393472	5.90903e-05	0.746492
HADHA	0.0722832	69818.8	6253.28	0.127572	0.125216	0.258855
HADHAP1	0.0121419	5759.55	-17.9159	0.270875	0.00363954	0.575184
EHHADH	0.274931	18774.1	2156.31	0.00980814	0.223286	0.140343
ECHS1	0.233333	22191.9	4636.9	0.021659	0.218345	0.146358
HIBCH	0.0261775	-29658.4	1758.67	0.211349	0.0198079	-0.464692
MLYCD	0.00249932	52189.2	223.184	0.392065	0.00241768	0.595456
ABAT	0.0153651	45003.4	211.452	0.253014	0.00983775	0.511918
ECHDC1	0.00525602	-69367.9	2687.52	0.335525	0.00377976	-0.572734
ALDH6A1	0.32094	-1670.69	848.592	0.000689608	0.258706	0.104032
HADH	0.205028	7156.92	1069.39	0.0374497	0.159089	0.217866
HADHB	0.254968	-12645.1	4517.21	0.0164254	0.186798	-0.188015
ACSM1	0.0032715	5443.19	30.5861	0.371312	0.00442771	0.563823
ACSM2A	0.0182345	937225	1833.89	0.239727	0.0229802	0.452885
ACSM4	0.208532	292.228	8.89124	0.0330899	0.105941	0.289374
ACSM5	0.00130425	226159	-203.643	0.446486	0.00192709	0.606594
ACSM3	0.205683	-4442.74	683.666	0.0366574	0.201329	-0.169303
ACSM2B	0.00716942	872043	-816.865	0.310894	0.00658047	0.539542
L2HGDH	0.0210883	-6937.95	343.741	0.22734	0.0259361	-0.44197
GAD1	0.00249932	26554.2	-85.748	0.391903	5.69158e-06	0.820673
GAD2	0.0464304	79.1676	0.903933	0.165715	0.0255767	0.444371
ALDH5A1	0.00872478	-41255.4	1679	0.294726	0.00707617	-0.534863
HMGCS1	0.0613883	8602.35	606.671	0.140903	0.0341872	0.416797
HMGCS2	0.268186	158.356	4.57629	0.0122108	0.0479098	0.384223
HMGCL	0.00720704	64070.6	1341.36	0.309857	0.000125758	0.717087
HMGCLL1	0.0451308	-242.177	6.60853	0.167598	0.0933653	-0.30495
OXCT1	0.00809289	-13668.5	651.641	0.30061	0.00735103	-0.531968
OXCT1_AS1	0.0127645	-383.9	10.2171	0.266902	0.0331512	-0.419398
OXCT2	0.0600763	280.049	7.54848	0.142819	0.0282945	0.433505
OXCT2P1	0.153208	-97.3015	5.52305	0.0636817	0.154816	-0.221478
AACS	0.0184001	17633.8	587.801	0.238233	0.00254308	0.593006
AACSP1	0.274734	1232.17	108.438	0.00993944	0.272617	0.0826465
BDH1	0.00699328	6070.3	56.6753	0.312843	0.000690136	0.654267
PIK3C3	0.000631608	-27451.8	1547.61	0.532047	2.29461e-05	-0.781912
MTM1	0.101793	4483	446.633	0.0998141	0.0686929	0.346625
MTMR1	0.281659	2380.56	999.636	0.00789452	0.0868107	0.316775
MTMR10	0.0508719	16753	1553.1	0.156613	0.0380546	0.40655
MTMR11	0.323102	2803.48	1966	0.00043493	0.300785	0.0456672
MTMR12	0.0109712	-23454.7	1637.81	0.276782	0.00838718	-0.523057
MTMR14	0.182643	7798.71	1324.15	0.0464967	0.124419	0.261306
MTMR2	0.026985	-19736.1	1612.58	0.208127	0.0139318	-0.488751
MTMR3	0.467431	42.8504	1565.8	2.52081e-06	0.267156	-0.0897751
MTMR4	0.0235315	24734	1113.52	0.21892	0.009611	0.513701
MTMR8	0.32094	-47.8057	31.974	0.00149938	0.398489	-0.0100245
MTMR6	0.135155	-8094.15	1422.74	0.0732366	0.0646792	-0.353086
MTMR7	0.0127645	945.054	47.9876	0.266821	0.00704944	0.535309
PI4KA	0.0203667	29822.2	2163.07	0.229968	0.00259318	0.591892
PI4KAP1	0.0367469	-10073.1	607.529	0.183184	0.0725526	-0.338606
PI4KAP2	0.00684196	13305	172.197	0.314524	0.00363954	0.575184
PI4KB	0.212237	7582.82	2699.17	0.0308806	0.165931	0.209401
PI4K2A	0.0316801	19251.9	591.359	0.195806	0.000960669	0.640232
PI4K2B	0.32094	774.836	946.294	0.00146753	0.449963	-0.000222767
SACM1L	0.229428	-3957.33	1262.28	0.0239435	0.149329	-0.227
INPP5F	0.135194	-5535.43	720.127	0.0730513	0.0548248	-0.36957
PIP5K1C	0.100303	-15497.4	2546.98	0.101199	0.054726	-0.370016
PIP5K1A	0.309171	-1304.31	1505.78	0.00381131	0.300785	-0.0485632
PIP5K1B	0.241943	-428.754	63.1668	0.0197333	0.267156	-0.0891068
PIP5KL1	0.278453	-617.389	60.6703	0.00898278	0.312378	-0.0320784
OCRL	0.0576064	5699.65	1001.01	0.14581	0.0255767	0.44442
INPP5B	0.000631608	14110.1	455.067	0.51825	2.47161e-05	0.777679
INPP5E	0.0101565	-13683.3	1029.61	0.283459	0.013413	-0.491869
SYNJ1	0.227778	-2571.44	600.058	0.0245766	0.0868107	-0.316552
SYNJ2	0.0738449	-26574.6	1172.95	0.125943	0.00925561	-0.515928
SYNJ2BP	0.257089	1307.08	368.841	0.0149647	0.289742	0.0719537
PLCB1	0.0140122	-45284.4	2314.52	0.259609	0.00274979	-0.589219
PLCB1_IT1	0.309569	-10.3351	1.16208	0.0034508	0.289742	0.0647608
PLCB2	0.0774613	61008	1308.22	0.122064	0.0025023	0.593897
PLCB2_AS1	0.247863	32.265	0.839627	0.0175049	0.0706024	0.341891
PLCB3	0.257089	-5898.02	1661.66	0.0153357	0.312378	0.0302963
PLCB4	0.0355113	56149.5	1169.49	0.187445	0.102693	0.29383
PLCD1	0.32094	-221.412	378.991	0.000531909	0.299853	-0.0548007
PLCD3	0.220895	-27027.9	2071.94	0.0283292	0.289742	0.0623747
PLCD4	0.0225589	12872.3	151.246	0.222593	0.00452621	0.562264
PLCE1	0.259715	-6505.68	834.713	0.0143946	0.252344	0.111606
PLCE1_AS1	0.135775	116.356	2.04675	0.0721214	0.147232	0.229483
PLCG1	0.270626	10581.9	2648.99	0.0118463	0.289742	0.0617064
PLCG2	0.107918	10041.8	770.332	0.0952371	0.0159753	0.478281
PLCH1	0.00687986	-9583.37	535.111	0.314135	0.0139215	-0.488973
PLCH1_AS1	0.143041	42.6854	0.304724	0.0683167	0.0363767	0.410739
PLCH1_AS2	0.274496	-18.9508	1.34037	0.0108272	0.117208	-0.272807
PLCH2	0.0544405	51946.3	444.71	0.151315	0.0699815	0.343729
ITPKB	0.0366029	-18251.8	1103.99	0.183919	0.0364608	-0.410337
ITPKB_IT1	0.225148	39.2218	1.85298	0.0258383	0.167313	0.20709
ITPKA	0.03273	20589	264.887	0.193408	0.00492387	0.556917
ITPKC	0.0653416	38472.4	2195.77	0.135769	0.144182	0.23346
INPP5A	0.00154396	-16492	871.198	0.432221	0.00123869	-0.629539
INPP5K	0.000507652	-37548	2001.16	0.563241	3.01766e-05	-0.770105
INPP5J	0.309171	452.687	88.3992	0.00425076	0.127526	0.253954
INPP1	0.00435053	-40253.8	1543.63	0.348797	0.00824705	-0.524616
IMPA2	0.129409	-55760.5	4398.24	0.0776499	0.125216	-0.258632
IMPA1	0.278453	2248.92	1144.39	0.00921259	0.449963	0.00222767
IMPA1P	0.00451288	225.681	-0.230848	0.346643	0.00925619	0.515834
ITPK1	0.0258142	48642.3	2725.51	0.212627	0.00207318	0.603698
ITPK1_AS1	0.171346	154.863	5.78019	0.0527339	0.117208	0.272667
IPMK	0.000653518	22501.1	426.445	0.494038	8.06573e-06	0.808867
IPMKP1	0.00536374	139.438	0.707345	0.333407	0.000609564	0.65901
IPPK	0.0365426	1128.34	64.7268	0.18445	0.0232015	0.451771
INPP4A	0.263342	5111.22	1036.2	0.0132033	0.201329	0.167966
INPP4B	0.00910043	-32632.3	1310.66	0.29128	0.0156312	-0.480954
ISYNA1	0.117855	-45564.2	2739.85	0.0867671	0.0593	-0.361774
PIK3CA	0.0255349	-11360.8	1043.72	0.213656	0.0203735	-0.462687
PIK3CD	0.039147	29904.4	928.303	0.178924	0.00677579	0.537982
PIK3CB	0.241943	10143	2363.31	0.0201005	0.312121	0.0354199
PIK3CG	0.0760274	8428.46	227.586	0.123693	0.0234394	0.451103
PTEN	0.00154396	-64763	4623.53	0.431985	0.00018318	-0.703498
PTENP1	0.00749409	-500.273	22.8809	0.306713	0.00185497	-0.609045
INPP5D	0.00750354	79437.6	1167.88	0.306425	7.70416e-05	0.737136
INPPL1	0.001829	104252	4210.01	0.413895	0.000217176	0.697038
PIK3C2G	0.195604	-174.386	6.40102	0.0420079	0.289742	-0.0629911
PIK3C2A	0.0422072	-24797.2	2497.59	0.17241	0.0809259	-0.325017
PIK3C2B	0.305279	2299.78	731.733	0.00505596	0.312378	0.0340833
PIKFYVE	0.281659	-4128.93	1454.72	0.00757266	0.225155	-0.136779
FIG4	0.171011	-3880.45	719.089	0.0532906	0.0878491	-0.314324
PIP4K2C	0.0182345	18759.6	784.294	0.239747	0.0179483	0.470929
PIP4K2A	0.178858	-14275.8	1908.24	0.0484407	0.124419	-0.261528
PIP4K2B	0.208532	9722.01	2704.07	0.034699	0.148215	0.228559
CDIPT	0.00702244	171622	3661.6	0.312272	0.000110726	0.723324
CDIPT_AS1	0.00998794	981.396	-1.38313	0.284608	0.000110726	0.724296
NDUFS1	0.202563	-35645.9	3904.98	0.0386949	0.116611	-0.274894
NDUFS2	0.196165	-10184.1	3700.51	0.0407865	0.218149	-0.14814
NDUFS3	0.00585494	-35838.7	2753.48	0.3267	0.0059705	-0.545334
NDUFS4	0.0173244	-50468.6	2349.29	0.243473	0.0304499	-0.42749
NDUFS5	0.32094	-8391.11	6064.62	0.000589085	0.190409	0.181555
NDUFS5P3	0.168992	-40.6458	1.6605	0.0546457	0.180347	-0.193806
NDUFS5P5	0.0829	90.011	0.353447	0.116675	0.0409727	0.399219
NDUFS6	0.115459	-27551.1	3500.18	0.0881771	0.0951365	-0.302518
NDUFS7	0.32094	1181.4	1234.16	0.0012226	0.258706	0.101359
NDUFS8	0.305279	-9828.69	3308.2	0.00458837	0.262094	0.0995768
NDUFV1	0.375883	-1289.6	6684.1	0.000196261	0.300785	0.0454445
NDUFV2	0.217263	504.734	32.3813	0.0293411	0.22481	0.137447
NDUFV2P1	0.0078751	-869.398	30.2509	0.302678	0.00371045	-0.573848
NDUFV3	0.0039491	-14257.8	1811.78	0.356029	0.000836029	-0.646024
NDUFA1	0.0857455	-26909.6	3462.68	0.113497	0.0776226	-0.3317
NDUFA10	0.132467	-14003.4	3269.18	0.0750783	0.103922	-0.29227
NDUFA11	0.135775	5802.13	569.011	0.0720629	0.0706024	0.341947
NDUFA12	0.0576064	-21444	2070.05	0.145941	0.0542719	-0.370907
NDUFA13	0.158677	819.746	52.5754	0.0608761	0.143387	0.234574
NDUFA2	0.315002	-1932.3	1300.33	0.00208649	0.339756	-0.0182669
NDUFA3	0.0695384	29009.6	1527.51	0.131278	0.0288137	0.431945
NDUFA3P1	0.259715	-31.8842	4.16522	0.0143927	0.289742	-0.0722959
NDUFA3P2	0.229428	63.3885	2.6308	0.0239541	0.411787	0.0051437
NDUFA3P4	0.305279	18.7663	1.91161	0.00474266	0.267156	0.0901276
NDUFA4	0.0574812	-85581.3	5962.76	0.146452	0.0296724	-0.429717
NDUFA4L2	0.0788445	2.35334e+06	36169.5	0.120734	0.0258443	0.442415
NDUFA5	0.00301632	-92239.5	5442.03	0.377491	0.00553106	-0.550457
NDUFA5P11	0.305279	-14.7744	2.48246	0.00511051	0.267156	-0.090422
NDUFA6	0.10912	-44918.5	3590.97	0.0939733	0.0433319	-0.393629
NDUFA6_AS1	0.230338	1015.83	179.712	0.0228679	0.223286	0.139452
NDUFA7.1	0.147601	198.456	14.7332	0.0658839	0.166588	0.207842
NDUFA8	0.000631608	-28720.3	1738.97	0.531311	3.12509e-05	-0.768546
NDUFA9	0.0513902	8134.16	374.568	0.155612	0.00824705	0.524839
NDUFA9P1	0.227066	-290.952	32.105	0.0252396	0.158241	-0.219203
NDUFAB1	0.0127162	51781.8	1733.59	0.267407	0.000123161	0.718201
NDUFB1	0.0263496	-10147.8	1540.83	0.210638	0.0229802	-0.452885
NDUFB10	0.0296896	107042	4287.9	0.20103	0.00362785	0.575407
NDUFB11	0.0924298	-22294.7	2937.38	0.107968	0.121922	-0.265315
NDUFB1P1	0.0184001	-103.404	3.54941	0.238227	0.0123381	-0.49788
NDUFB1P2	0.178858	120.108	5.98638	0.0482072	0.18395	0.190243
NDUFB2	0.0725573	-14511.8	1775.67	0.127302	0.0479098	-0.384273
NDUFB2_AS1	0.257089	-158.858	21.039	0.0150251	0.339756	0.0171531
NDUFB3	0.281659	-5260.64	1735.64	0.00790854	0.218149	-0.14814
NDUFB4	0.315002	-5893.86	4054.88	0.00207301	0.308193	0.0400981
NDUFB4P2	0.021505	-213.294	6.21	0.226067	0.165931	-0.210718
NDUFB5	0.00279959	-58278.1	3328.03	0.384947	0.000713436	-0.653153
NDUFB6	0.000631608	-26739.7	1378.44	0.526933	0.000123161	-0.718869
NDUFB7	0.191807	25388.2	3937.52	0.0435196	0.122531	0.263979
NDUFB8	0.0089869	-6620.29	463.209	0.292114	0.00704944	-0.535309
NDUFB8P2	0.255199	-99.6323	11.1029	0.0163626	0.286108	-0.0732903
NDUFB9	0.0472823	73881.8	3124.52	0.163854	0.0299717	0.428826
NDUFC1	0.281659	7540.37	2773.74	0.00819201	0.226394	0.134106
NDUFC2	0.0072305	-5087.34	443.638	0.309444	0.00234018	-0.597238
UQCRFS1	0.101422	-46381.2	2851.47	0.100364	0.0222844	-0.455558
UQCRFS1P1	0.135194	-1565.77	87.6772	0.073005	0.0622273	-0.35665
CYC1	0.0510429	99782.5	5406.78	0.156189	0.0228368	0.453331
UQCRC1	0.135194	-32171.1	4659.54	0.0729629	0.0609437	-0.3591
UQCRC2	0.0127645	98011.8	4366.26	0.266545	0.00247882	0.594342
UQCRH	0.0503004	63370.6	3001.84	0.157527	0.0357176	0.412119
UQCRB	0.274496	-22743.4	7517.77	0.0105208	0.167172	-0.207396
UQCRBP1	0.268186	-40.2795	6.76946	0.0122825	0.182053	-0.19158
UQCRQ	0.202426	15130.9	2150.66	0.0387963	0.158303	0.218757
UQCR10	0.375883	1111.82	2517.05	0.000110871	0.190409	0.181778
UQCR11	0.247863	-2972.46	754.838	0.0176811	0.325062	-0.0211629
COX10	0.0260934	-12908.1	614.343	0.211607	0.00138637	-0.624416
COX10_AS1	0.0235946	-2790.05	199.923	0.218689	0.0210124	-0.460237
COX11	0.00154396	-24235.1	1898.34	0.431343	0.000178765	-0.704389
COX14	0.257089	3778.78	748.168	0.0152061	0.197052	0.172867
COX15	0.315002	1152.82	1541.63	0.00226812	0.270998	0.0844287
COX16	0.0569841	-4576.14	344.759	0.147319	0.0538203	-0.371798
COX17	0.0170331	32233.9	870.773	0.244718	0.000836029	0.646024
COX17P1	0.145466	132.23	6.36227	0.0670187	0.0522774	0.375585
COX18	0.103728	-2776.48	662.136	0.0979408	0.0255767	-0.44442
COX19	0.270626	-2304.3	795.167	0.0118586	0.284777	-0.0744042
COX20	0.199781	734.49	67.0295	0.0396418	0.239802	0.118512
COX20P1	0.0194733	4541.38	10.9236	0.233161	0.00299375	0.585432
COX4I2	0.00771289	-20762.1	601.423	0.304118	0.0763631	-0.333482
COX4I1	0.111148	114256	12807.5	0.0922344	0.0401541	0.401426
COX5A	0.268186	-17739	3785.51	0.0124107	0.312378	-0.0305191
COX5B	0.20562	-77043.4	9784.47	0.0368946	0.225383	-0.136333
COX5BP2	0.21281	-26.9132	1.37473	0.0307395	0.142003	-0.236186
COX5BP3	0.32094	-9.4902	1.94614	0.00146835	0.24164	0.117191
COX5BP6	0.315002	-31.689	12.3777	0.00244995	0.300785	-0.0514592
COX6A1	0.16261	20916.4	1685.16	0.0588316	0.125216	0.258187
COX6A1P2	0.0553409	702.452	40.6219	0.149556	0.0590138	0.362219
COX6A2	0.274734	310.477	31.6865	0.00989258	0.270998	0.0855425
COX6B1	0.100304	-94096.6	7749.63	0.101123	0.0446023	-0.390956
COX6B1P3	0.315002	8.77272	1.11434	0.00269484	0.212741	-0.156932
COX6B1P5	0.12466	118.396	2.90978	0.0817276	0.107958	0.287369
COX6B2	0.219506	-107.153	7.20251	0.0286753	0.276494	-0.0781668
COX6C	0.0425227	114910	3604.79	0.171943	0.00697589	0.536423
COX6CP1	0.162712	205.108	10.5404	0.0580224	0.0878491	0.314101
COX6CP10	0.32094	-8.07517	2.49027	0.000719889	0.339756	0.0181577
COX6CP17	0.278453	22.635	1.65204	0.00921749	0.226394	0.133156
COX6CP2	0.00885733	276.329	0.877914	0.293772	0.00230552	0.598528
COX7A1	0.00431496	-34560.4	1115.06	0.349812	0.000512357	-0.66585
COX7A2	0.0977595	-34202.6	3415.81	0.103251	0.0573234	-0.36467
COX7A2L	0.268186	-10504.1	3527.71	0.0123705	0.289742	-0.0703944
COX7A2P1	0.0937145	323.044	2.57983	0.106532	0.0819458	0.323484
COX7B	0.163587	-21895.7	3624.55	0.0576777	0.145004	-0.232346
COX7BP1	0.128951	79.6013	1.55443	0.0779775	0.0419702	0.397472
COX7BP2	0.111148	79.3824	1.04792	0.0922116	0.186942	0.186068
COX7C	0.00128351	-233826	10556.7	0.449094	0.000350174	-0.68033
COX7CP1	0.012458	-383.652	15.7255	0.268959	0.00368667	-0.574293
COX8C	0.206377	38.2178	0.872598	0.0355371	0.299853	0.0536804
COX8A	0.228051	-11841.2	1733.54	0.0241545	0.434213	0.00445534
CYCS	0.0743839	-80890.3	5565.63	0.125499	0.0177125	-0.47182
CYCSP10	0.223128	91.7136	4.50312	0.0274786	0.218149	0.150162
CYCSP2	0.315002	-6.34169	1.08988	0.00249447	0.404843	0.00656101
CYCSP24	0.111148	129.302	1.84312	0.0920872	0.106888	0.288293
CYCSP28	0.32094	21.4708	7.37694	0.00157205	0.300785	0.0492315
CYCSP34	0.129409	-383.06	25.636	0.0775168	0.116611	-0.274672
CYCSP38	0.21024	47.1993	1.25166	0.0316661	0.231936	0.126961
CYCSP40	0.244953	121.89	7.00148	0.0183697	0.268448	0.0865299
CYCSP45	0.305279	-13.2114	1.25312	0.00517208	0.202626	-0.165711
CYCSP52	0.130152	121.136	0.495746	0.0765788	0.0889055	0.311899
CYCSP55	0.0703846	-71.3313	3.12265	0.129842	0.0700711	-0.343175
ATP6AP1	0.300183	10917.8	6012.5	0.00598468	0.411787	0.00601471
ATP6AP1L	0.159533	-3498.03	352.542	0.0605411	0.192843	-0.178436
ATP6AP2	0.375883	-3072.08	6295.54	0.000259882	0.149329	-0.226777
ATP6V0A1	0.00154396	92923.7	2189.29	0.429828	0.00075569	0.650257
ATP6V0A2	0.32094	367.956	623.878	0.000557601	0.289742	-0.0628203
ATP6V0A4	0.23537	-74.9365	4.8988	0.0210663	0.225383	-0.136191
ATP6V0B	0.00364789	144330	2908.28	0.361895	0.000321035	0.683449
ATP6V0C	0.000632183	2312.53	12.8121	0.495922	0.000205762	0.699043
ATP6V0CP1	0.0249802	462.955	2.10661	0.215338	0.0364608	0.410297
ATP6V0CP3	0.255199	23.6567	1.03678	0.0163315	0.289742	0.0668372
ATP6V0D1	0.00451288	85762.4	2341.77	0.346696	0.000866515	0.644465
ATP6V0D2	0.274496	-358.192	30.2774	0.0102537	0.136175	-0.243262
ATP6V0E1	0.163587	47820.3	5047.7	0.0576491	0.192843	0.177545
ATP6V0E1P1	0.0443099	286.851	2.6577	0.169056	0.0685892	0.347003
ATP6V0E1P2	0.268186	62.5471	5.41603	0.0123356	0.204965	0.164179
ATP6V0E2	0.0527027	22020.9	836.027	0.153297	0.039207	0.403654
ATP6V0E2_AS1	0.208532	-504.21	58.1257	0.0344814	0.227808	-0.13121
ATP6V1A	0.0133484	55077.7	2057.53	0.263391	0.0052443	0.553353
ATP6V1B1	0.309171	205.239	30.7674	0.00405165	0.300785	0.0443306
ATP6V1B2	0.209884	36783.1	4181.19	0.0321017	0.180347	0.19403
ATP6V1C1	0.00499375	86816.3	1660.94	0.338923	0.000580451	0.661395
ATP6V1C2	0.320911	165.213	61.892	0.00176168	0.118649	0.268657
ATP6V1D	0.274734	-3919.58	1423.86	0.010011	0.272747	-0.0819782
ATP6V1E1	0.195604	22638.4	4409.91	0.0421357	0.117208	0.272667
ATP6V1E1P1	0.281659	-15.1496	1.88565	0.00859024	0.312378	-0.0341213
ATP6V1E2	0.0398467	4447.95	249.773	0.177632	0.0341872	0.416574
ATP6V1F	0.20396	-27485.9	3092.36	0.0378507	0.168153	-0.205837
ATP6V1G1	0.0293843	-40888.5	3387.08	0.201833	0.0139318	-0.488751
ATP6V1G1P2	0.120927	148.729	1.1072	0.0845211	0.0330023	0.419771
ATP6V1G1P4	0.153549	169.944	5.91804	0.063291	0.111138	0.282914
ATP6V1G2.1	0.0728588	-590.478	25.9811	0.126935	0.0602628	-0.360214
ATP6V1H	0.0235295	58988.7	1069.03	0.219895	0.00396277	0.569615
ATP8A1	0.0626905	-11310.8	744.92	0.139431	0.0255767	-0.444197
ATP8A2	0.165803	-15833.3	602.133	0.0564284	0.00377976	-0.572734
ATP8A2P2	0.103193	-256.604	9.20431	0.0983373	0.213876	-0.154676
ATP8B1	0.0152049	-43342.1	1587.56	0.25368	0.00159276	-0.61751
ATP8B2	0.0643711	-11776.5	1010.96	0.136952	0.0522851	-0.375362
ATP8B3	0.0631183	51308	663.03	0.138557	0.00824705	0.524393
ATP8B4	0.0495805	13177.1	163.818	0.158601	0.000393796	0.676098
ATP8B5P	0.193801	367.563	20.135	0.0427598	0.161931	0.215193
TCIRG1	0.312821	9744.15	5143.37	0.00294881	0.339756	0.0167075
PPA2	0.0224482	-22605.8	1877.1	0.222937	0.0107529	-0.506795
PPA1	0.065684	-84081.4	5526.39	0.135122	0.0175218	-0.472489
LHPP	0.0032715	26363.9	627.3	0.371023	0.00083011	0.64647
GLUD2	0.00315591	-2388.01	112.074	0.374589	0.00208877	-0.60303
GLUD1	0.0184458	-104438	7458.13	0.237323	0.0533783	-0.372466
GLUD1P2	0.141528	-262.912	24.1058	0.0688947	0.201329	-0.167966
GLUD1P3	0.208532	933.794	86.181	0.0339227	0.231936	0.126754
GLUD1P6	0.184678	103.436	4.56307	0.0456057	0.222927	0.141011
GLUD1P8	0.0210869	657.288	-0.270995	0.227541	0.0334671	0.41862
CPS1	0.177826	4541.61	128.673	0.0494024	0.312121	0.0356427
CA13	0.30419	-1333.62	399.852	0.0053818	0.339756	-0.016262
CA1	0.32094	-226.347	26.6014	0.00161229	0.292852	0.0583649
CA10	0.224555	-25.4064	1.61779	0.0268897	0.236644	-0.123623
CA11	0.0472823	-7462.7	409.686	0.163925	0.0440665	-0.391847
CA12	0.00181301	1.78912e+06	17741.6	0.415806	2.75786e-05	0.774338
CA14	0.111422	-1394.88	93.5753	0.0914647	0.132429	-0.249053
CA15P1	0.147206	372.072	13.0708	0.0660646	0.11034	0.284028
CA6	0.32094	22.9885	7.12681	0.00106373	0.300785	0.0481177
CA7	0.233145	-24.1452	1.5197	0.0219186	0.312378	-0.0318842
CA5B	0.102499	-3899.57	324.642	0.0989588	0.046052	-0.387615
CA5BP1	0.0484346	4689.48	389.567	0.16141	0.0448365	0.39051
CA9	0.0555275	-126729	6651.52	0.149052	0.11395	-0.279127
CA3	0.32094	108.009	45.9339	0.00151208	0.26333	0.0944532
CA5A	0.0550617	89.1464	0.615654	0.150146	0.0117923	0.500566
CA8	0.32094	-135.316	34.0162	0.00143388	0.289742	-0.0719537
CA2	0.00237984	-136267	5100	0.396746	0.00377976	-0.572511
CA4	0.0574812	-6226.49	156.443	0.146451	0.00881344	-0.519938
PAPSS2	0.271484	11643	2442.31	0.0115244	0.192843	0.177991
PAPSS1	0.244245	-6518.11	1719.67	0.0190778	0.201837	-0.166407
BPNT1	0.181431	-5338.33	1051.32	0.0470473	0.084369	-0.320116
SUOX	0.0123136	21354	871.338	0.269969	0.00232431	0.597684
ETHE1	0.160997	-10797.5	851.025	0.0593648	0.0316705	-0.423257
MPST	0.00181301	160967	2522.1	0.415989	9.49384e-05	0.731344
TST	0.0544405	27725.2	1035.44	0.151386	0.0527579	0.37358
TSTA3	0.21561	25452.2	2557.85	0.0298762	0.0927104	0.305859
TSTD1	0.160994	10351.9	634.236	0.0594698	0.0586324	0.362887
TSTD2	0.17464	-1512.39	189.951	0.0505222	0.0797808	-0.326799
TSTD3	0.0448643	-584.665	61.5674	0.168228	0.0134478	-0.491647
SELENBP1	0.176665	10596.3	1244.76	0.0499638	0.146858	0.230564
ACSF3	0.000631608	63381.3	500.881	0.524994	1.98859e-05	0.785922
MCAT	0.270491	-3386.04	946.592	0.011907	0.325062	0.0213856
FASN	0.323102	3642.64	2757.07	0.000462515	0.118812	0.268211
OXSM	0.210939	1157.44	277.452	0.0313935	0.209533	0.160615
CBR4	0.0704658	-6795.28	973.941	0.12957	0.0499466	-0.379818
HSD17B8.1	0.323102	-481.014	598.746	0.000479112	0.339756	0.0151482
MECR	0.0167908	14744.1	588.065	0.246058	0.00586806	0.546447
OLAH	0.223321	-169.647	9.27344	0.027334	0.097477	-0.299309
ACSL6	0.00834724	2882.15	10.8777	0.298434	0.000512357	0.66585
ACSL4	0.311014	4613.65	2488.51	0.00320936	0.339756	-0.0175986
ACSL1	0.0106212	343515	4011.91	0.279496	0.00159218	0.617733
ACSL5	0.157105	27510.8	1827.92	0.0616612	0.126805	0.255514
ACSL3	0.157726	12633.9	1514.82	0.0612616	0.300785	0.048786
ACSBG1	0.0485533	561.618	10.6696	0.161083	0.0485274	0.382268
ACSBG2	0.076722	485.401	11.5057	0.122923	0.0287527	0.432168
ACAA2	0.0182345	-87884.8	3929.32	0.239196	0.00838718	-0.523057
PPT1	0.274496	22146.6	5510.22	0.0106956	0.265361	0.0926711
PPT2.3	0.000317476	-12430.9	543.776	0.58911	2.61097e-05	-0.775897
PPT2_EGFL8	0.205028	-110.762	12.6367	0.0373439	0.174693	-0.200267
ELOVL1	0.0774613	38809.8	2355.06	0.122129	0.0405127	0.400758
ELOVL2	0.00702244	-5455.95	155.283	0.312383	0.000769426	-0.649366
ELOVL2_AS1	0.110364	-97.0883	3.08457	0.0929956	0.117208	-0.272808
ELOVL3	0.278453	46.0565	4.03035	0.00935107	0.212384	0.158387
ELOVL4	0.0136609	-1023.89	37.304	0.262048	0.0145875	-0.485855
ELOVL5	0.119318	-31964.4	3279.86	0.0854973	0.051844	-0.376253
ELOVL6	0.375883	124.095	580.532	2.92066e-05	0.312378	0.0294052
ELOVL7	0.00559292	-46764.4	2044.81	0.330336	0.00212948	-0.602139
HSD17B12	0.208532	11482.6	1831.99	0.0347317	0.258706	0.103364
TECR	0.281659	-7332.23	3178.42	0.00854405	0.300785	-0.0456672
TECRP1	0.305279	129.882	32.363	0.00503625	0.267156	0.0908889
ACOT4	0.323102	-442.998	262.068	0.000441852	0.253962	0.10871
ACOT2	0.163688	-5257.24	710.533	0.0573925	0.196263	-0.174872
ACOT1	0.274931	-822.595	167.422	0.00977695	0.262094	-0.0995768
ACOT11	0.000507652	12041.9	105.676	0.56137	1.9714e-05	0.789041
ACOT13	0.0410022	-9871.47	788.244	0.174939	0.025797	-0.442861
ACOT7	0.049784	84569.2	1595.89	0.158223	0.00653243	0.539987
THEM4	0.00910984	-18989.8	1079.01	0.291111	0.00898351	-0.518601
THEM5	0.0255048	3209.89	46.3036	0.213906	0.0248611	0.446425
ACAA1	0.171346	8803.82	1243.9	0.0529262	0.0478246	0.384496
ACADM	0.208532	18441.1	1426.54	0.0338449	0.184235	0.189797
ACADL	0.02244	-73054.9	2380.93	0.223053	0.0919351	-0.30675
ACADVL	0.128902	122323	13024.8	0.0780647	0.082077	0.323012
GCDH	0.0465311	8725.09	723.125	0.165432	0.0158343	0.479395
CPT1A	0.0924986	67740.4	4137.88	0.107779	0.0797808	0.327245
CPT1B	0.121706	825.414	28.687	0.0836035	0.114989	0.277122
CPT1C	0.375883	-38.5612	164.024	4.29666e-05	0.270998	-0.085097
CPT2	0.30674	-1608.46	525.468	0.00445434	0.265292	0.0928938
ECI1	0.0928153	60854.4	3547.36	0.107307	0.0255767	0.443752
ECI2	0.274496	-2309.46	930.604	0.0107148	0.289742	0.0646024
CYP2U1	0.242582	-1150.12	346.54	0.0193744	0.201329	-0.168412
FDFT1	0.0978809	-18606.6	1603.61	0.102905	0.0562909	-0.366897
SQLE	0.0413393	34554.5	376.414	0.174315	0.0107529	0.506795
LSS	0.121706	10236.8	986.578	0.0834746	0.133783	0.24638
CYP51A1	0.0509027	-1121.06	46.2138	0.156498	0.0313013	-0.424371
CYP51A1P2	0.233145	185.488	12.9907	0.0219146	0.223809	0.138116
CYP51A1P3	0.0329572	1329.67	15.1364	0.192779	0.036951	0.409
TM7SF2	0.101422	9577.33	526.953	0.100331	0.103922	0.29227
LBR	0.120199	-30934.7	2652.28	0.0848735	0.0384237	-0.405436
MSMO1	0.0168013	39264.3	987.34	0.245922	0.00388739	0.570952
NSDHL	0.133824	-4426.75	695.82	0.0742277	0.120524	-0.266652
HSD17B7	0.0207393	16154.2	438.684	0.228866	0.0156661	0.480508
HSD17B7P2	0.230338	1447.8	145.233	0.0233684	0.231936	0.1272
EBP	0.171346	-7135.91	1106.9	0.0528925	0.17744	-0.196703
EBPL	0.00955705	-29375	1361.78	0.287327	0.00230552	-0.598575
DHCR24	0.00245897	418356	2885.73	0.394313	0.00350304	0.576966
SC5D	0.00750354	23505.4	596.378	0.306362	6.28978e-05	0.743819
DHCR7	0.208532	5653.58	727.302	0.0330675	0.0791428	0.329918
LIPA	0.32094	15847.4	5623.99	0.00163675	0.127393	-0.254177
CEL	0.169598	-438.03	29.7061	0.0538672	0.180347	-0.193807
CELA1	0.039147	205.133	-0.154679	0.178714	0.0712357	0.34096
CELA2A	0.0117132	230.347	1.06983	0.273058	0.031204	0.424975
CELA2B	0.000709048	1478.24	-3.01805	0.489932	0.000119947	0.719983
CELF1	0.119026	18409.4	4037.21	0.0858784	0.0659681	0.351303
CELF2	0.205028	17838.6	1201.16	0.0371731	0.152011	0.224549
CELF2_AS1	0.224555	621.082	9.22599	0.0264474	0.00983775	0.512141
CELF3	0.0142286	169.238	1.60415	0.258536	0.00647774	0.540604
CELF4	0.0475484	5019.39	31.7695	0.162781	0.0197147	0.465137
CELF5	0.17456	1651.58	53.0495	0.0511486	0.0677426	0.34863
CELSR1	0.0481366	70896.1	5549.98	0.161974	0.0112019	0.503899
CELSR2	0.195604	-23308.2	2352.14	0.0415962	0.339756	-0.0184897
CELSR3	0.00130425	10791.5	87.0379	0.447591	0.000190187	0.701716
SOAT2	0.000317476	563.964	1.38499	0.596381	2.47161e-05	0.778125
SOAT1	0.0777259	57948.1	2167.61	0.121647	0.0131716	0.493429
CYP2R1	0.17164	-2636.55	504.947	0.0523206	0.117208	-0.271998
CYP27B1	0.291218	-3298.65	269.51	0.00651417	0.296913	-0.0559145
CYP24A1	0.000631608	523980	-3361.72	0.521787	0.000670372	0.655603
CYP46A1	0.203225	-1847.85	158.79	0.0383736	0.213876	-0.155269
CYP39A1	0.00154396	-1689.34	56.9787	0.429374	0.00054434	-0.663623
HSD3B7	0.00192721	543928	1569.35	0.410508	3.25925e-06	0.83649
CH25H	0.101213	4123.73	19.5392	0.100538	0.0454004	0.389174
CYP7B1	0.218399	4088.94	266.396	0.0290773	0.191484	0.180664
CYP7A1	0.119026	-68.7479	3.47818	0.086023	0.0666947	-0.350078
CYP27A1	0.0491606	-50901.8	2728.94	0.159799	0.0485182	-0.382491
CYP8B1	0.0039644	77360.2	-225.798	0.355522	0.00717208	0.533527
AKR1D1	0.291235	47.6685	3.23336	0.00648054	0.300785	-0.0495856
AKR1C4	0.00916269	2313.07	-2.94928	0.290572	0.00881344	0.519947
SLC27A5	0.0355113	3703.97	139.992	0.18739	0.000940481	0.641123
AMACR	0.21024	-1446.33	226.861	0.0317268	0.0869979	-0.315661
ACOX2	0.00249327	13356.9	44.0463	0.392388	0.00532113	0.552462
HSD17B4	0.257089	12439.4	3768.09	0.0156043	0.258706	-0.102027
SCP2	0.0473841	65736.2	3589.33	0.1633	0.00316249	0.582758
ACOT8	0.000598347	9818.27	411.466	0.540068	1.98859e-05	0.786367
BAAT	0.19096	-3093.85	134.104	0.0438113	0.367851	0.0120294
CYP11A1	0.0123878	3473.08	-9.2813	0.269344	0.000172532	0.705843
CYP17A1	0.0294483	-2026.39	84.611	0.20163	0.026623	-0.439296
CYP17A1_AS1	0.0808958	-85.6723	2.67352	0.11879	0.0433319	-0.393874
STS	0.0031107	45194.3	457.905	0.37555	0.000445368	0.67142
SULT2B1	0.00584399	7819.16	16.1279	0.327037	0.00169543	0.613946
CYP21A2.2	0.300811	-588.037	72.8508	0.00591143	0.11779	0.270885
HSD3B2	0.375883	-20.8111	13.879	0.000214861	0.398511	0.00913751
SRD5A1	0.0324742	32821.6	689.693	0.194087	0.0174678	0.472934
SRD5A2	0.134092	149.446	2.7476	0.0740004	0.0216533	0.457915
SRD5A3	0.274496	-2876.41	1053.3	0.0110065	0.218149	-0.149477
SRD5A3_AS1	0.0127899	1302.3	52.6511	0.266235	0.00824705	0.524839
AKR1C2	0.0178117	17209.4	8.56725	0.241586	0.0221321	0.456227
AKR1C3	0.0679345	98354.5	3545.2	0.132776	0.212384	0.157719
HSD11B1	0.281659	-384.538	57.8526	0.00758025	0.246394	-0.115616
HSD11B1L	0.00865739	10252.7	158.188	0.295851	0.000197955	0.700157
HSD11B2	0.0182345	-37886.7	1021.46	0.239283	0.0479737	-0.383827
AKR1C1	0.122757	16945.7	772.346	0.0828299	0.0932218	0.305191
SULT1E1	0.178016	-242.691	6.79418	0.049059	0.0568322	-0.365805
HSD17B1	0.135194	803.897	61.0728	0.0729038	0.142003	0.236133
HSD17B10	0.216845	-14201	2722.58	0.0294956	0.187761	-0.183783
HSD17B11	0.247863	-8277.73	1898.84	0.0176555	0.116611	-0.275117
HSD17B13	0.0234433	-618.118	23.8957	0.220325	0.0092139	-0.516597
HSD17B14	0.034797	69661.9	1101.11	0.188927	0.00116403	0.632881
HSD17B1P1	0.32094	74.831	38.4784	0.00124518	0.289742	0.0679439
HSD17B2	0.234689	600.664	41.8434	0.0212953	0.201329	0.168635
HSD17B6	0.259715	-265.875	30.5224	0.0144323	0.153798	-0.222767
DHRS11	0.167543	-7381.19	471.005	0.0554061	0.169129	-0.204277
CYP1A2	0.305279	-9.86939	1.1576	0.00462812	0.300785	-0.0497611
CYP3A5	0.129409	54137.6	1761.53	0.077748	0.116611	0.275117
CYP3A7	0.111684	-1497.42	59.7147	0.0912619	0.237372	-0.122076
CYP2E1	0.00141884	10373.3	7.69318	0.440311	0.000984699	0.639341
CYP3A4	0.242582	-95.8119	8.77255	0.0194094	0.223809	-0.138177
CYP3A43	0.0774613	-253.111	9.97803	0.122084	0.136134	-0.243484
CYP1B1	0.136216	-29675.3	1529.13	0.0714407	0.0491032	-0.381377
CYP1B1_AS1	0.168992	2016.42	18.6427	0.0541347	0.164221	0.21252
CYP19A1	0.309569	-166.888	23.1974	0.00347407	0.258706	-0.10371
COMT	0.179166	21214.9	3385.58	0.048003	0.158303	0.21898
COMTD1	0.195604	-7750.2	1104.51	0.041155	0.281205	-0.0757408
LRTOMT	0.00125215	9662.16	212.533	0.451964	8.92692e-05	0.732903
HSD17B3	0.145402	1315.48	35.6165	0.0671288	0.0379811	0.406772
GK	0.227066	9277.61	711.356	0.0252497	0.136134	0.243707
GK3P	0.262129	43.2597	3.30381	0.01345	0.22488	0.13724
GK5	0.00949268	-9860.67	446.005	0.287904	0.0427056	-0.395634
GKAP1	0.00321516	-13181.1	459.652	0.373215	0.0255767	-0.44442
GK_AS1	0.208778	892.752	18.6452	0.0326531	0.0693331	0.345512
GK_IT1	0.0460035	1195.78	8.60745	0.166273	0.0134478	0.491647
GPAM	0.21024	-1120.2	355.876	0.0317739	0.289742	-0.0719537
GPAT2	0.208532	-1461.56	95.3409	0.0347279	0.239899	-0.118289
AGPAT1	0.0759075	-8105.17	1006.62	0.123957	0.0685892	-0.346848
AGPAT2	0.208532	18949.6	2602.05	0.0330636	0.220443	0.143685
AGPAT3	0.0429419	51635.4	3565.7	0.171354	0.00446967	0.563155
AGPAT4	0.0220098	-7352.3	463.516	0.224218	0.00348043	-0.577412
AGPAT5	0.241943	-4797.25	1154.91	0.0196749	0.289742	-0.065048
LCLAT1	0.102499	-3409.15	447.986	0.0989428	0.0809259	-0.32524
MBOAT1	0.315002	-600.246	369.466	0.00223864	0.339756	0.0173758
MBOAT2	0.00125215	22915.5	211.732	0.452085	0.000110726	0.723993
LPIN1	0.175755	-9208.46	1096.34	0.0502202	0.141638	-0.237024
LPIN3	0.00177852	233625	324.583	0.419069	0.0013354	0.626198
LPIN2	0.32094	2736.02	2534.13	0.000726484	0.218149	0.149699
DGKZ	0.00499375	164690	3670.04	0.339219	0.000107138	0.725552
DGKZP1	0.0106275	1255.43	20.9532	0.279088	0.00343815	0.57808
DGKD	0.0235295	-49082.5	2506.76	0.219614	0.0556476	-0.368011
DGKI	0.000631608	86740.4	-259.884	0.531666	0.00129488	0.627757
DGKA	0.188702	11336.5	651.086	0.0443509	0.111448	0.2818
DGKE	0.0264494	-8464.74	487.902	0.209896	0.0438245	-0.392515
DGKB	0.0192116	-1301.04	41.2951	0.234372	0.0306442	-0.427012
DGKH	0.00521171	-53285.3	1845.38	0.336057	0.0234394	-0.45088
DGKG	0.224555	2266.46	246.523	0.0265177	0.14633	0.231009
DGKQ	0.0921962	11742.1	774.36	0.108168	0.0792573	0.329695
DGKK	0.00585494	-279.522	7.99825	0.326808	0.00239905	-0.595838
DGAT1	0.0182345	37857.5	1239.36	0.239842	0.00167117	0.614614
DGAT2	0.32094	836.318	225.597	0.00144591	0.114989	0.277568
DGAT2L6	0.274734	24.4518	1.11495	0.01005	0.289742	0.0647361
DGAT2L7P	0.0170331	1277.87	-0.803091	0.244725	0.0454931	0.388728
MOGAT3	0.0235295	53141.8	-53.8043	0.219441	0.0377733	0.407218
PNPLA2	0.00791456	131338	2355.54	0.302266	0.00280862	0.588328
PNPLA3	0.0052667	3626.79	1.49139	0.335154	0.000139888	0.712409
PNLIPRP1	0.0764007	100.873	1.31779	0.123324	0.0569448	0.365484
LIPC	0.208532	-29612.6	1621.5	0.0332712	0.312378	-0.0300735
LIPG	0.0298248	-7896.05	264.332	0.200707	0.00377976	-0.572734
LPL	0.110098	-11340.7	631.686	0.0933302	0.165669	-0.211183
AGK	0.301128	-3281.61	1294.41	0.00583836	0.434213	-0.00423257
MGLL	0.0128247	471793	7265.96	0.265955	0.00838718	0.523057
ABHD16A	0.227824	-464.785	56.0765	0.0242312	0.161931	-0.215193
MOGAT1	0.375883	18.3734	11.5274	0.000268251	0.300785	-0.043934
MOGAT2	0.32094	-38.2031	7.46074	0.000762683	0.128252	0.253213
GPD1L	0.125834	-3211.78	489.707	0.0810618	0.0897442	-0.310537
GPD1	0.0451175	88179.5	990.8	0.167699	0.00922176	0.516374
GPD2	0.205683	-25966.9	1887.89	0.0365612	0.0948903	-0.302963
GNPAT	0.135194	-9497.84	2234.66	0.0728188	0.097477	-0.299399
ADPRM	0.00105024	-9290.19	346.555	0.46125	1.9714e-05	-0.789932
CHPT1	0.0238674	51828.1	786.295	0.217918	0.0135276	0.490978
CEPT1	0.000867892	26796.6	478.958	0.478632	3.16593e-05	0.767209
SAMD8	0.212127	-4107.02	1071.14	0.0310307	0.212384	-0.157942
SGMS1	0.168992	-5513.48	1108.67	0.0542803	0.116611	-0.27534
SGMS2	0.315002	1894.38	1261.45	0.00257172	0.289742	0.0679439
PLD1	0.0043845	-28292.9	1429.93	0.348292	0.000433747	-0.672533
PLD2	0.467431	-68.8126	1637.2	1.87509e-06	0.237372	0.122522
PLD3	0.23537	53732.2	10245.5	0.0211085	0.209533	0.160838
PLD4	0.206377	4700.44	397.992	0.0357885	0.186942	0.186901
LCAT	0.17456	10096.5	534.176	0.0510524	0.141227	0.237692
PLA2G10	0.375883	4.75118	6.894	8.73697e-05	0.312121	0.0365338
PLA2G2D	0.247863	2036.15	74.169	0.0178613	0.0569448	0.365561
PLA2G2F	0.07685	88.0297	0.212975	0.122603	0.00790131	0.527523
PLA2G12A	0.270709	9963.66	1692.88	0.0117433	0.0909465	0.308309
PLA2G12AP1	0.30401	34.3046	4.04376	0.00543874	0.191624	0.180441
PLA2G12B	0.00509901	29933.8	-61.0337	0.33734	0.00391236	0.570314
PLA2G1B	0.00279959	3304.55	3.20693	0.383471	6.28978e-05	0.743596
PLA2G5	0.0278988	-1540.53	51.4004	0.205356	0.00435859	-0.564937
PLA2G2A	0.127261	4814.77	-17.3656	0.0795589	0.020637	0.461779
PLA2G2C	0.00555656	1044.87	-1.65872	0.330926	0.000148795	0.710497
PLA2G4E	0.0608933	191.916	0.793799	0.141396	0.000803743	0.647689
PLA2G4A	0.0365426	-3968.25	237.117	0.184213	0.010392	-0.5088
JMJD7_PLA2G4B	0.164054	2470.46	107.99	0.0570462	0.220322	0.143907
PLA2G4B	0.17456	227.649	10.4071	0.0511144	0.0877298	0.314547
PLA2G4C	0.030451	13186.8	435.874	0.19882	0.0222844	0.455558
PLA2G4D	0.199781	180.003	3.10252	0.0395582	0.027969	0.434867
PLA2G4F	0.0838762	72.2685	0.212537	0.115438	0.0258365	0.442579
PLA2G6	0.0631183	22819.8	1075.61	0.13876	0.0408201	0.399867
PLB1	0.0263496	11471.2	145.792	0.210605	0.00327004	0.580308
LPCAT2	0.32094	-1572.1	977.161	0.00114965	0.267156	-0.0920028
LPCAT1	0.00176413	831620	3719.48	0.420702	0.000481066	0.668746
LPCAT4	0.309171	-3054.95	1150.78	0.00373203	0.289742	0.0610381
LPCAT3	0.000632183	213797	184.485	0.500566	3.85204e-06	0.829139
LYPLA1	0.0244535	49491.2	1895.06	0.216506	0.00924768	0.516151
LYPLA1P3	0.375883	2.18648	2.78222	8.13828e-05	0.300785	0.0500669
PLA2G15	0.00154396	76131.4	695.933	0.430435	2.75786e-05	0.774338
LYPLA2	0.00490549	53785.9	2151.38	0.340749	0.00366303	0.574739
LYPLA2P1.2	0.32094	4.64503	2.49623	0.000630034	0.300785	0.0476934
PNPLA6	0.148718	20033.8	3358.77	0.0651261	0.0915724	0.307418
PNPLA7	0.178016	-14502.2	1017.67	0.0491154	0.225155	-0.136779
GPCPD1	0.311014	-5597.29	1787.16	0.00313799	0.218149	-0.149031
ACHE	0.000161836	86462.6	138.063	0.654368	3.25925e-06	0.843396
CHKA	0.315002	-645.083	463.391	0.00248982	0.252803	-0.11027
CHKB	0.045533	1456.46	24.6554	0.167028	0.0683773	0.347739
CHKB_AS1	0.00130425	5079.16	31.162	0.447741	4.27881e-05	0.757853
PHOSPHO1	0.198864	1584.05	75.4095	0.0399721	0.0479098	0.384273
ETNK1	0.000631608	132605	1501.37	0.507665	0.00186362	0.608377
ETNK2	0.168992	20054.1	558.201	0.0549692	0.272661	0.0824238
ETNPPL	0.0365426	-461.429	15.6429	0.184403	0.0504086	-0.379095
PEMT	0.0182345	-6915.28	574.899	0.24022	0.0271655	-0.437737
CDS1	0.281659	3362.69	454.847	0.00860792	0.398511	-0.00735131
CDS2	0.0632618	-28904	2121.72	0.13832	0.0158343	-0.479395
PLA1A	0.209884	15777.1	1189.16	0.0320355	0.0889055	0.312097
PTDSS1	0.00549544	164655	1169.48	0.33172	0.000152975	0.709513
PTDSS2	0.00420724	38784.2	958.322	0.351583	0.000538252	0.664068
PISD	0.323102	-1332.7	1801.41	0.000397846	0.216877	0.151259
PGS1	0.0072521	28242.5	984.008	0.309175	0.000272287	0.68835
CRLS1	0.257089	-12607.4	2407.45	0.0161327	0.124545	-0.259969
LPGAT1	0.00586934	85517.8	2206.49	0.326381	0.00224805	0.599689
MBOAT7	0.00833613	78701.5	2135.46	0.298724	0.00182415	0.609936
AGPS	0.0490437	-39465.5	3031.18	0.160005	0.0143244	-0.486969
ENPP6	0.0948241	404.07	11.7211	0.105124	0.124149	0.261974
ENPP2	0.309171	-89520.4	13232.2	0.00408657	0.398511	0.00757408
GDPD3	0.0867127	4498.25	168.398	0.112847	0.081883	0.32368
GDPD1	0.0036582	-4491.53	227.346	0.361597	0.000462914	-0.670083
TMEM86B	0.0572069	1348.15	70.7546	0.146955	0.0100217	0.510805
UGT8	0.0235301	-18775.7	791.262	0.219093	0.0181544	-0.470038
GAL3ST1	0.012679	277953	4209.42	0.26766	0.00438611	0.564491
PAFAH1B1	0.00284199	-57067.2	4236.84	0.382428	0.00234981	-0.596793
PAFAH1B2	0.259817	6981.48	3149.96	0.0138342	0.253962	0.108042
PAFAH1B3	0.375883	-748.956	689.682	0.000185472	0.137083	0.242148
PLA2G7	0.26655	6561.55	292.595	0.0127471	0.284816	0.0741814
PAFAH2	0.00894355	23931.7	811.935	0.292584	0.0123046	0.498107
SPTLC1	0.0143184	-26302.3	1803.81	0.258122	0.00602486	-0.544665
SPTLC1P1	0.127425	-93.4111	4.55271	0.0792886	0.206492	-0.163206
SPTLC1P4	0.0552752	132.865	-0.0433077	0.149699	0.0331512	0.419313
SPTLC2	0.345895	-1064.2	2018.58	0.000339647	0.237372	-0.122522
SPTLC3	0.0263496	-19923.3	1044.95	0.210588	0.00158569	-0.618401
KDSR	0.0159126	-51450.1	3470.93	0.250918	0.0163713	-0.476721
CERS1	0.108087	-304.892	11.3945	0.0950885	0.0236107	-0.450101
CERS2	0.015106	99123.1	2737.75	0.254536	0.000904434	0.642683
CERS4	0.134092	20631.9	1962.91	0.0739313	0.0819616	0.323235
CERS3	0.0875495	263.174	6.96543	0.111855	0.0540882	0.371353
CERS6	0.192578	5469.88	475.295	0.0430943	0.131802	0.249722
CERS6_AS1	0.257089	31.5259	2.84359	0.0161288	0.206641	0.162638
CERS5	0.171953	-11575.9	2139.64	0.0521874	0.167313	-0.207173
ASAH1	0.309171	20615.7	6110.92	0.0035426	0.308193	-0.0394298
ASAH2	0.000631608	-542.768	15.5728	0.510004	0.00042973	-0.672918
ASAH2B	0.111422	839.187	119.798	0.0915452	0.0693331	0.345289
ACER2	0.0942354	-1193.96	64.0182	0.105503	0.118649	-0.269102
ACER1	0.32094	-8.13163	2.05731	0.00172549	0.404843	0.00650086
ACER3	0.323102	-875.402	1743.82	0.000441264	0.26333	-0.0960126
DEGS1	0.014392	166868	4222.14	0.257655	0.00668745	0.538651
DEGS2	0.108815	1641.52	27.0189	0.0944237	0.0059705	0.545334
SMPD1	0.0634649	25689.5	1336.48	0.138076	0.023189	0.451994
SMPD2	0.32094	-1179.98	598.775	0.00154587	0.137587	0.241702
SMPD3	0.278453	-1579.26	215.259	0.00927373	0.219326	0.144799
SMPD4	0.278453	-16746.4	3014.35	0.00892344	0.148903	0.227668
SMPD4P1	0.274496	-25.9401	1.95763	0.0109817	0.197052	-0.172888
ENPP7	0.0137638	26996.9	-110.833	0.261244	0.000676004	0.655119
ENPP7P1	0.0808958	234.131	2.0591	0.118773	0.111018	0.283127
ENPP7P10	0.274931	79.2434	5.40935	0.00977049	0.312378	0.0333223
ENPP7P11	0.300811	32.3936	5.28188	0.00593528	0.312378	0.0262865
ENPP7P12	0.00538403	1954.46	-7.99499	0.333088	0.00826464	0.524006
ENPP7P4	0.0234433	1501.05	13.1855	0.220372	0.0466059	0.386723
ENPP7P5	0.0339316	356.282	-0.662222	0.190481	0.000486182	0.667775
ENPP7P6	0.0553409	110.962	0.0742067	0.149506	0.124419	0.260563
ENPP7P8	0.0273936	-3025.03	77.0754	0.206693	0.174693	-0.200491
CERK	0.30674	-4855.84	2162.64	0.00442092	0.325062	-0.0204946
CERKL	0.208532	-5564.27	813.581	0.0339439	0.165931	-0.210738
SGPP1	0.315002	1022.73	768.166	0.00245144	0.398511	-0.00868791
SGPP2	0.0433828	65915.2	1195.17	0.170658	0.0284624	0.433059
SPHK1	0.10263	-11416.2	712.739	0.0987485	0.0735529	-0.337492
SPHK2	0.00421037	17632.8	354.869	0.351384	0.00891533	0.519047
SGPL1	0.0023888	94539.7	2243.24	0.396195	0.000753183	0.65048
UGCG	0.0745318	-29151	3110.83	0.125321	0.0405127	-0.400758
GBA2	0.278453	-10846.7	2436.08	0.00927658	0.264282	-0.0933394
B4GALT6	0.000628187	-24428.7	655.534	0.536206	5.71372e-06	-0.818
B4GALT5	0.000631608	126455	1925.22	0.522223	2.31799e-05	0.780353
GALC	0.153208	20236.5	1248.88	0.0637174	0.0919351	0.30675
ARSA	0.000507652	101550	1461.47	0.552642	6.56301e-05	0.74226
NEU1.1	0.375883	-1073.38	3845.77	8.03458e-05	0.339756	0.0167075
NEU3	0.281659	1032.8	159.158	0.00793752	0.231936	0.127645
NEU4	0.108087	-427.258	22.8348	0.0950431	0.108191	-0.286701
B4GALNT1	0.168992	-8053.7	376.191	0.0548911	0.033803	-0.417911
GM2A	0.257089	24071.2	3627.75	0.0161094	0.300785	0.0521275
GM2AP2	0.0764007	53.6291	0.287151	0.123369	0.0156312	0.480997
PSAP	0.119026	1.35182e+06	65811.6	0.086043	0.0878491	0.314324
PSAPL1	0.244245	26.5064	0.969991	0.018894	0.213876	0.155923
PTGS1	0.00851655	204978	1153.73	0.296972	0.001396	0.62397
PTGS2	0.219506	8504.46	260.04	0.0287737	0.171046	0.202718
PTGES	0.0127645	3045.74	16.2632	0.266666	0.000128018	0.716196
PTGES2	0.244754	-7885.57	1951.36	0.0185113	0.289742	-0.0661618
PTGES3	0.303868	-24578.4	9288.04	0.00562588	0.186942	-0.18601
PTGES3L	0.32094	17.9593	9.18335	0.00139389	0.339756	0.0171531
PTGES3P1	0.167311	1357.68	177.592	0.0556187	0.258706	0.102473
PTGES3P2	0.00595986	876.125	3.72567	0.324711	9.49384e-05	0.731344
PTGES3P3	0.315002	-71.1458	25.1901	0.00222205	0.299853	-0.052573
PTGES3P4	0.26655	18.0356	1.0254	0.0128806	0.289742	0.0635027
CBR1	0.186218	23351.6	2150.92	0.0451253	0.165931	0.209846
CBR3	0.0060507	-8529.24	252.702	0.323381	0.000148795	-0.710627
CBR3_AS1	0.0553409	-718.284	52.1746	0.149534	0.0526608	-0.374026
HPGD	0.166847	-132078	4805.16	0.0557925	0.0049546	-0.556472
HPGDS	0.082473	-1921.7	113.267	0.117129	0.055195	-0.368679
TBXAS1	0.133824	26690.3	1312.73	0.0742084	0.118649	0.269771
PTGDS	0.236663	-4124.87	277.112	0.0208353	0.026623	-0.439074
PTGIS	0.195604	-10283.2	502.915	0.0415277	0.00791669	-0.527067
ALOX5	0.0016594	112760	1156.08	0.42492	0.000502669	0.666519
ALOX5AP	0.274496	19916.5	1169	0.010877	0.137587	0.241702
LTA4H	0.114898	-23747.5	3264.68	0.0890581	0.0627248	-0.355759
PTGR2	0.13874	-5329.63	575.83	0.070025	0.111138	-0.282914
PTGR1	0.10896	31106.1	1570.39	0.094197	0.050456	0.378927
CYP4F2	0.009868	11123.9	-61.5274	0.285418	0.000231944	0.694228
CYP4F22	0.230338	-79.1427	7.70668	0.0235016	0.221199	-0.143239
CYP4F23P	0.32094	-21.4466	3.67811	0.00169323	0.180959	0.192871
CYP4F24P	0.0404018	-166.003	5.31157	0.176308	0.00828014	-0.523737
CYP4F25P	0.00464495	-698.063	16.8275	0.344617	0.0170565	-0.47438
CYP4F29P	0.0272571	889.531	-1.48407	0.207132	0.0255767	0.443726
CYP4F3	0.000709048	405896	-2082	0.489862	3.12509e-05	0.768769
CYP4F32P	0.00834724	3806.87	-22.6816	0.298536	0.000485436	0.668244
CYP4F35P	0.00349738	-2463.49	92.6343	0.365317	0.00396598	-0.569392
LTC4S	0.32094	9.5569	1.69956	0.00154377	0.308193	-0.0382447
GGT1	0.375883	3127.97	4238.22	0.000132001	0.180347	0.194253
GGT5	0.00717226	-51664.1	1554.18	0.310611	0.0018614	-0.608822
GGT2	0.0123136	35501.7	-113.898	0.270086	0.00178699	0.611062
GPX4	0.0482131	432931	13461.2	0.16173	0.0143244	0.486969
CYP2J2	0.0655057	31852.2	124.085	0.135421	0.117713	0.27133
CYP2C19	0.00146001	8331.47	-43.9555	0.438198	0.000254736	0.690486
ALOX12	0.209003	1285.5	188.151	0.0324672	0.177672	0.195812
ALOX12B	0.241943	-1683	112.539	0.0198476	0.367851	-0.0115839
ALOX12P1	0.178858	-27.6682	1.25804	0.0484323	0.237372	-0.121953
ALOX12P2	0.102103	2609.9	113.375	0.0992939	0.0908481	0.308755
ALOXE3	0.205683	-476.977	20.4327	0.0363514	0.161931	-0.214963
ALOX15B	0.110815	6428	113.083	0.0926563	0.0969791	0.300067
CYP2B6	0.129409	-120.638	5.46394	0.0776333	0.11034	-0.284246
CYP2C8	0.000867892	20417.8	49.8885	0.477567	1.9714e-05	0.787258
CYP2C9	0.000631608	53914	-255.298	0.518017	0.00165462	0.61506
EPHX2	0.299695	-10604	1376.49	0.00609276	0.226394	0.134106
ALOX15	0.224555	-53.7592	3.17163	0.02663	0.201329	-0.168399
FADS2	0.206377	26778.5	1456.08	0.0357209	0.289742	0.0723993
SCD	0.00338368	311378	2359.78	0.367829	0.00163182	0.615951
SCD5	0.281659	6071.23	298.595	0.00764611	0.449963	0.0026732
SCDP1	0.0375471	55.0685	0.228354	0.181729	0.0701205	0.342669
FADS1	0.0403176	49913.5	1033.63	0.176568	0.00788041	0.527735
NUDT9	0.00149536	-19127.5	1376.95	0.434124	0.000346102	-0.680776
NUDT5	0.00130425	47767.3	1106.8	0.447455	9.82405e-05	0.729785
PPAT	0.375883	-82.1451	525.825	3.92385e-05	0.300785	0.0465583
GART	0.184663	-19215.8	2124.28	0.0457928	0.0722275	-0.339274
PFAS	0.0413393	-15080.4	1113.82	0.174172	0.0134926	-0.491201
PAICS	0.309171	7794.02	3519.31	0.00425423	0.272661	0.0824238
PAICSP1	0.206377	-90.2405	8.20209	0.0356227	0.187761	-0.184228
PAICSP4	0.244245	-27.6635	2.84218	0.0187968	0.192843	-0.178568
ADSL	0.119026	-18961.6	2017.22	0.0860389	0.045969	-0.387837
ATIC	0.257089	-13335.6	2683.31	0.0160615	0.284737	-0.0746269
APRT	0.0035534	202102	2240.53	0.363849	2.75786e-05	0.773447
NT5C2	0.178793	8085.26	693.672	0.048579	0.0941021	0.303854
NT5C1B	0.305279	-34.7358	4.26954	0.00496832	0.228599	-0.13061
NT5C	0.257089	-5574.16	1991.84	0.0157461	0.300785	-0.0432168
NT5C3A	0.00189516	-37099.1	2027.45	0.411694	0.000848091	-0.645356
NT5C3AP1	0.000709048	-847.461	27.1663	0.488891	0.00011241	-0.721988
NT5C3B	0.0165161	-63106.2	2932.21	0.24771	0.00159337	-0.617287
NT5CP1	0.182932	50.108	2.26917	0.0463778	0.130285	0.251393
NT5CP2	0.208532	34.8625	0.683884	0.0341458	0.107958	0.287376
NT5M	0.108485	-3745.18	206.203	0.0946927	0.0281142	-0.434173
NT5DC4	0.241943	111.41	6.03995	0.0200473	0.127372	0.254874
NT5E	0.0276061	-112193	3513.54	0.206114	0.00113622	-0.633995
PNP	0.00933132	-22414.9	1113.36	0.289376	0.00190171	-0.607263
PNPLA1	0.00421037	2885.3	1.54054	0.351314	0.00037292	0.678103
PNPLA4	0.209003	3442.42	545.916	0.0325646	0.144182	0.233683
PNPLA5	0.180951	29.6521	0.467615	0.0473297	0.0868107	0.316514
PNPLA8	0.00509671	-26006.1	1665.92	0.337513	0.00326758	-0.580531
PNPO	0.115346	7552.74	365.359	0.0885859	0.0796667	0.32769
PNPT1	0.278453	-2324.57	1068.75	0.00936371	0.218149	-0.150368
PNPT1P1	0.281659	-25.0401	2.09178	0.00759608	0.289742	-0.0609765
XPNPEP1	0.00154396	62101.9	1602.81	0.432056	3.37486e-05	0.764759
XPNPEP2	0.0544405	13984.8	-80.1676	0.151197	0.00316249	0.582536
XPNPEP3	0.0252607	17060.9	678.927	0.214679	0.0109591	0.505235
LACC1	0.201881	-5780.76	699.65	0.0390021	0.14498	-0.232791
HPRT1	0.278453	-2485.2	1006.08	0.00915956	0.182053	-0.19158
IMPDH1	0.208532	21326.7	1828.48	0.034481	0.124149	0.261974
IMPDH1P10	0.00674151	629.876	2.97522	0.315491	0.00814347	0.525507
IMPDH1P11	0.281659	12.9465	0.821829	0.00799708	0.316227	0.0247477
IMPDH1P6	0.135775	128.656	0.678615	0.0719453	0.110333	0.284509
IMPDH2	0.315002	-3490.52	2853.96	0.00211121	0.339756	-0.0160392
NME6	0.0593324	1649.56	345.267	0.143616	0.0288137	0.431945
NME7	0.243803	-2692.83	483.781	0.0192057	0.237372	-0.121185
NME2P1	0.32094	32.5855	32.0785	0.000779798	0.299853	-0.0552462
NME4	0.00742476	221180	3227.08	0.307563	5.8017e-05	0.747383
NME1	0.270709	-6043.16	1142.22	0.0117723	0.312378	-0.026732
NME1_NME2	0.205167	-495.751	65.9601	0.0370229	0.226394	-0.134106
NME3	0.00219457	208561	2433.02	0.401138	9.90135e-05	0.728448
AK9	0.0192116	-12049.2	555.847	0.234362	0.137587	-0.241479
ENTPD3	0.0307716	371.094	3.1401	0.198104	0.00924768	0.516151
ENTPD3_AS1	0.0588583	1125.11	74.0888	0.14427	0.0214796	0.458454
ENTPD8	0.230338	-1037.9	63.5884	0.0231908	0.300785	0.0519047
ENTPD1	0.00834724	-62497.6	3167.18	0.298241	0.0070554	-0.535086
ENTPD1_AS1	0.191807	1157.8	101.284	0.0434694	0.181284	0.192248
CANT1	0.278453	6848.35	2280.6	0.00905002	0.223286	0.14012
ENTPD4	0.30674	4312.2	1534.81	0.00447392	0.114989	0.277122
ENTPD5	0.0106212	35916.4	538.703	0.279799	0.00322514	0.581422
ENTPD6	0.262129	16602	2903.34	0.0133715	0.308193	-0.0394298
NUDT16	0.223339	-11387.9	2966.8	0.0271713	0.218149	-0.147694
NUDT16L1	0.00669809	52996.8	672.161	0.31618	4.66653e-05	0.754289
NUDT16P1	0.32094	-268.612	421.704	0.000504135	0.325062	-0.0216084
ITPA	0.303868	-4568.27	1893.29	0.00563345	0.177582	-0.196258
XDH	0.00142519	15959.5	-61.3674	0.439778	3.56897e-05	0.763094
NUDT2	0.00688281	-8593.88	538.525	0.313963	0.0136932	-0.490087
NUDT21	0.0359292	-41354.2	2790.68	0.18615	0.0309469	-0.42593
NUDT22	0.032039	13371.5	795.505	0.194951	0.00230552	0.598129
GMPS	0.119026	-23540.3	1999.25	0.085963	0.0542719	-0.370907
GMPSP1	0.0570555	-152.175	7.52116	0.147172	0.0271655	-0.437737
GMPR	0.208532	-5816.3	340.597	0.034171	0.237372	0.122522
GMPR2	0.0039948	-40310.9	2367.33	0.354529	0.000190187	-0.701716
GDA	0.0523605	21820	1112.42	0.153793	0.0293884	0.430386
GDAP1	0.00291758	8747.77	139.201	0.380809	0.000100153	0.728002
GDAP1L1	0.00593415	1579.13	2.88102	0.325335	0.00508628	0.554913
GDAP2	0.0407031	6402.51	357.426	0.175489	0.00375558	0.573179
GUK1	0.0211307	347538	7849.85	0.227042	5.8017e-05	0.747829
RRM1	0.290714	-4305.16	1145.67	0.00656341	0.325062	-0.0238361
RRM1_AS1	0.205028	-45.0861	2.80073	0.0374368	0.154486	-0.221955
RRM2B	0.0411213	73140.5	1141.64	0.174704	0.0858126	0.317888
RRM2	0.32094	-4752.27	1120.31	0.00155145	0.312121	0.0349744
RRM2P2	0.197274	-65.8854	4.60097	0.0403213	0.237372	-0.120865
RRM2P3	0.0267771	-2258.06	78.2227	0.208877	0.118649	-0.26888
HDDC2	0.000631608	-68573.1	2435.05	0.517626	0.000148795	-0.710404
DGUOK	0.323102	471.989	1089.58	0.000406464	0.26333	0.0957898
DGUOK_AS1	0.0544405	596.696	15.1173	0.151066	0.0666947	0.35019
DCK	0.32094	-785.929	783.416	0.00125245	0.300785	-0.0485632
HDDC3	0.309171	680.191	301.265	0.00379254	0.21301	0.156605
ADCY1	0.00490549	-7779.45	217.291	0.340842	0.012977	-0.494543
ADCY10	0.00596821	-2216.52	78.5139	0.324364	0.0296724	-0.429717
ADCY10P1	0.120927	-2964.62	200.141	0.0844622	0.126347	-0.256628
ADCY2	0.0576064	-7316.52	217.379	0.146009	0.00316249	-0.582758
ADCY3	0.102874	14437.5	790.286	0.0985602	0.116476	0.275563
ADCY4	0.0523491	-20448.4	887.384	0.154059	0.0835221	-0.321007
ADCY5	0.137701	-24514	1020.1	0.0707955	0.165931	-0.209624
ADCY6	0.00661144	52395.5	1115.54	0.317188	0.00637362	0.541769
ADCY7	0.128118	18532.1	458.612	0.0785501	0.0352133	0.413901
ADCY8	0.10896	3360.86	5.75213	0.0942488	0.0227087	0.454201
ADCY9	0.165914	18628.2	1439	0.0562218	0.177582	0.19648
GUCY1A2	0.00279959	-46263.3	1598.36	0.383837	0.00124301	-0.629317
GUCY2C	0.205683	509.304	58.8889	0.0367348	0.186942	0.186901
GUCY2D	0.0060507	2496.27	3.7849	0.323458	0.00326758	0.580531
NPR1	0.100923	-43259.7	2556.95	0.100751	0.0795723	-0.328359
NPR2	0.176796	3076.56	252.882	0.0498733	0.262094	0.098463
PDE1A	0.00610563	-11779.6	365.22	0.322484	0.00699642	-0.5362
PDE1B	0.206429	-3931.81	398.611	0.0352748	0.148215	-0.228782
PDE1C	0.375883	293.382	251.904	0.000150241	0.434213	0.00356427
PDE2A	0.0294785	-24116.9	761.402	0.201485	0.0694342	-0.344843
PDE3A	0.0117783	-31891.4	1034.26	0.272564	0.0693331	-0.345512
PDE3B	0.196029	3437.23	166.223	0.0408694	0.0868107	0.316775
PDE5A	0.00371505	-26716.7	944.634	0.360488	0.00367483	-0.574516
PDE6A	0.274496	-62.4056	10.2624	0.0109314	0.308193	-0.0398753
PDE6B	0.0867816	20551.4	622.889	0.112674	0.0421639	0.396971
PDE6C	0.242049	341.43	33.5584	0.0195537	0.255994	0.105369
PDE6D	0.168992	-2756.61	680.088	0.054462	0.038067	-0.406327
PDE6G	0.230338	362.958	28.0903	0.0234006	0.312378	-0.0340833
PDE9A	0.375883	573.544	783.179	0.000168832	0.196678	-0.174204
PDE10A	0.311014	13685.3	2296.14	0.00322397	0.27149	0.0833148
PDE11A	0.00527626	14813.6	252.205	0.334897	0.00100218	0.638673
AMPD2	0.0195514	40474.3	1611.55	0.2327	0.00686511	0.537314
AMPD3	0.00742476	49179.4	260.231	0.307473	1.60385e-05	0.79461
AMPD1	0.0703846	1114.3	1.03302	0.129715	0.0392542	0.403445
ADK	0.0012137	-13758	761.025	0.454973	0.000110726	-0.72377
ADA	0.178016	5459.27	600.965	0.0490432	0.100043	0.296503
ADAD2	0.061994	491.454	0.939208	0.140242	0.104719	0.290542
ADAL	0.20562	-1137.34	378.9	0.0368879	0.133783	-0.246603
ADAM10	0.227066	-21159.5	5213.16	0.0252561	0.124419	-0.261306
ADAM11	0.218399	-463.916	58.8284	0.0290516	0.300785	-0.0449989
ADAM12	0.157726	-26719	1424.73	0.0613203	0.116611	-0.274449
ADAM15	0.315002	-10515.8	4424.9	0.00245714	0.267156	0.0915572
ADAM17	0.309171	1512.54	708.083	0.00364565	0.284816	0.0741814
ADAM18	0.0329572	2045.99	-6.30966	0.192806	5.99994e-05	0.745479
ADAM19	0.126265	-12121	916.661	0.080339	0.0824365	-0.322567
ADAM1A	0.00596802	5080.02	173.254	0.324507	0.00709438	0.534195
ADAM1B	0.257089	-124.733	16.1827	0.0157169	0.26333	-0.0953443
ADAM20	0.32094	-16.3694	5.68793	0.000852751	0.434213	0.00378704
ADAM20P1	0.130434	136.219	2.91917	0.0762647	0.227808	0.131433
ADAM21	0.32094	-18.2701	6.42913	0.000716376	0.262094	-0.0978382
ADAM22	0.0644199	-34548	1613.02	0.136671	0.0130109	-0.49432
ADAM23	0.0102084	-3141.25	83.982	0.283099	0.000110726	-0.722625
ADAM28	0.101781	39806.4	660.177	0.0998945	0.00790131	0.527512
ADAM29	0.311014	-11.5284	2.12245	0.00324681	0.268022	-0.0878903
ADAM32	0.00650115	-1492.41	67.6314	0.318095	0.00230552	-0.598352
ADAM33	0.0904889	1442.84	-0.904306	0.109908	0.367851	0.0122522
ADAM7	0.227066	-161.727	7.23384	0.0249574	0.289742	-0.0676179
ADAM8	0.309569	15941.6	2184.01	0.00335193	0.122462	0.264424
ADAM9	0.281659	-32930.7	6934.12	0.00776454	0.289742	-0.0670529
ADAMDEC1	0.149917	23039.8	106.991	0.0646906	0.0616301	0.357987
ADAMTS1	0.46608	-744.221	3603.57	7.56504e-06	0.339756	-0.0160392
ADAMTS10	0.230125	26043.1	2337.93	0.0236729	0.249186	0.113611
ADAMTS12	0.0359768	-12815.2	461.984	0.18575	0.00666765	-0.538873
ADAMTS13	0.0977595	5184.8	212.393	0.103267	0.114989	0.277345
ADAMTS14	0.315002	3186.59	715.059	0.00262236	0.201329	0.168857
ADAMTS15	0.157105	-22282.7	915.747	0.0616806	0.0549172	-0.369348
ADAMTS16	0.0653012	-1617.03	67.5478	0.135902	0.0527511	-0.373803
ADAMTS17	0.165914	-1270.13	105.977	0.0563184	0.164801	-0.212074
ADAMTS18	0.00638499	-3408.91	87.809	0.319367	0.000164005	-0.707524
ADAMTS19	0.375883	-2.43765	1.79438	7.50002e-05	0.367851	-0.0115756
ADAMTS2	0.00321516	-46376.2	1492.84	0.37305	0.000580451	-0.661172
ADAMTS20	0.259715	-28.7361	2.15963	0.0144323	0.289742	-0.0697539
ADAMTS3	0.0873261	-15862.8	547.174	0.112099	0.00456531	-0.561818
ADAMTS4	0.130434	-79193.1	3678.99	0.076272	0.263252	-0.0964581
ADAMTS5	0.0235295	-27797.7	1023.87	0.2198	0.131177	-0.25039
ADAMTS6	0.0104702	-2725.52	103.67	0.281425	0.00156456	-0.619069
ADAMTS7	0.0128867	-26904.4	903.166	0.265537	0.0237829	-0.449321
ADAMTS7P2	0.213165	32.9455	0.623127	0.0304771	0.289742	0.0714273
ADAMTS7P3	0.32094	-19.1392	5.68596	0.00115191	0.449963	0.00155937
ADAMTS7P4	0.305279	-290	44.6874	0.0049328	0.192843	0.178436
ADAMTS8	0.268186	-209.609	34.1583	0.0123867	0.218149	-0.149031
ADAMTS9	0.153208	-12577.4	1467.24	0.0635335	0.0890054	-0.311651
ADAMTS9_AS1	0.278453	7487.73	743.827	0.00899467	0.289742	0.0699488
ADAMTS9_AS2	0.274496	2744.11	314.32	0.0107962	0.234388	0.124972
ADAMTSL1	0.155515	-1957.84	97.2183	0.0623588	0.0258443	-0.442415
ADAMTSL2	0.114898	-3792.48	179.586	0.0890225	0.158303	-0.21898
ADAMTSL3	0.204857	-12079.2	1077.87	0.0375925	0.26333	-0.0942304
ADAMTSL4	0.00865739	45453.5	922.208	0.295391	0.000753183	0.650702
ADAMTSL4_AS1	0.101793	458.562	13.9272	0.0998106	0.0662787	0.350858
ADAMTSL5	0.227066	-3495.57	200.624	0.0248999	0.289742	-0.0701716
ADAP1	0.00593415	16871.5	113.464	0.325236	0.000389265	0.676543
ADAP2	0.0523605	33429.5	959.82	0.153964	0.0159641	0.478503
ADAR	0.0306072	59392.5	6934.6	0.198468	0.0072143	0.533081
ADARB1	0.0379538	-20366.8	1162.27	0.181002	0.0572286	-0.364892
ADARB2	0.0267889	-588.648	23.1881	0.208761	0.00615604	-0.543551
ADAT1	0.0102387	11091.6	726.399	0.282841	0.00324629	0.580976
ADAT2	0.0488152	-5142.79	369.083	0.160584	0.0321545	-0.422143
ADAT3	0.203225	1292.58	193.802	0.0382403	0.127372	0.254623
AK7	0.00581831	-3609.75	134.763	0.327527	0.0152785	-0.482736
AK4	0.0107651	144552	2760.02	0.278244	0.000123161	0.718869
AK4P1	0.00294659	878.805	2.37636	0.37958	0.000230307	0.69481
AK4P3	0.0310914	126.522	0.896859	0.197211	0.0197757	0.464875
AK4P4	0.101491	70.6401	0.225586	0.100182	0.228913	0.12976
AK5	0.093909	-1403.42	67.9998	0.106171	0.00316249	-0.582758
AK2	0.00146214	151284	3681.1	0.43634	3.56897e-05	0.762977
AK1	0.0094383	-2512.14	182.247	0.28838	0.00541092	-0.551571
AK8	0.0559654	-4226.32	199.797	0.148511	0.132478	-0.248608
AK3	0.0192871	-33581.6	2162.56	0.233975	0.0424681	-0.396302
AK3P2	0.173748	103.013	1.38915	0.0516013	0.196816	0.173605
AK3P3	0.315002	-37.0521	10.8717	0.00234257	0.226394	-0.134328
AK3P5	0.0308291	236.145	1.62184	0.197845	0.0345158	0.415634
ENTPD2	0.217263	-7199.06	570.555	0.0293868	0.289742	-0.0639341
NTPCR	0.315002	-2215.31	1826.83	0.00244431	0.268022	-0.0877702
PDE4A	0.179166	-6778.51	1393.18	0.0479087	0.237372	-0.121854
PDE4B	0.0924298	22245.5	498.492	0.107941	0.0131618	0.493652
PDE4C	0.32094	-187.136	96.7349	0.000718485	0.312378	-0.029628
PDE4D	0.0169327	-34648.9	1703.4	0.245168	0.00502787	-0.555581
PDE4DIP	0.00181301	165391	3855.01	0.416217	0.000221322	0.69637
PDE7A	0.224555	25769.8	2033.26	0.0269202	0.24895	0.114502
PDE7B	0.00777903	-10914.2	320.061	0.303466	0.0435943	-0.392961
PDE8B	0.0078751	-10764.8	426.17	0.302768	0.0181107	-0.470261
PDE8A	0.309569	-4473.37	1741.28	0.00344985	0.218149	-0.147472
ENPP4	0.00123042	-34725.5	1620.18	0.453187	0.000264515	-0.689241
ALLC	0.0977991	151.352	3.10897	0.103021	0.0479737	0.38387
CAD	0.22147	10445.9	1838.1	0.0281502	0.122531	0.263756
CADM1	0.309171	-5015.88	1583.16	0.00378552	0.339756	0.0151482
CADM3	0.32094	-334.964	99.113	0.000920636	0.165931	0.209401
CADM4	0.305279	-3100.47	607.091	0.00499783	0.289742	0.0708399
CADPS	0.177826	-292.476	13.3443	0.0492943	0.00765868	-0.529576
CADPS2	0.114387	-28824.1	2127.89	0.0895851	0.0364608	-0.410337
DHODH	0.0092518	35371.7	521.423	0.2899	0.00114016	0.633772
UMPS	0.305279	1506.76	689.038	0.00517743	0.164079	0.212742
CMPK1	0.0413393	56930.1	3738.71	0.174124	0.0249714	0.445979
CMPK2	0.187204	2645.61	321.312	0.0448505	0.0961784	0.301181
ASMTL	0.00712151	-13361.1	941.33	0.311337	0.000126105	-0.716864
ASMTL_AS1	0.0039491	22395.9	47.0505	0.355919	0.00090123	0.642905
CTPS1	0.107647	-21137.1	1152.56	0.0955042	0.0229926	-0.452662
CTPS2	0.00279959	-10249.9	812.571	0.384869	0.000957279	-0.640455
UCK1	0.00750354	-20096	1555.83	0.306225	0.00129937	-0.627535
UCK2	0.168992	-8077.15	946.668	0.0547907	0.186942	-0.187793
UCKL1	0.137892	10994	1306.69	0.0706342	0.0941021	0.303854
UPP2	0.0115943	11487	-4.39793	0.273889	0.00409448	0.567833
UPP2_IT1	0.00154396	837.359	-3.41124	0.430628	0.00115531	0.633235
UPP1	0.129409	-33872.2	2767.25	0.0777438	0.0824365	-0.322344
CDA	0.00269312	114619	-180.038	0.38808	0.00138637	0.624416
CDADC1	0.00717226	-11508.5	541.139	0.310554	0.0325908	-0.42103
CDAN1	0.305279	658.79	685.435	0.00480852	0.300785	0.0461128
DCTPP1	0.0513902	19819.4	774.747	0.155443	0.0173521	0.47338
DCTD	0.0601248	-36918.8	3486.07	0.142696	0.0159244	-0.478726
DTYMK	0.0912518	15419.4	1009.1	0.108956	0.0522928	0.37514
DUT	0.191807	-8303.05	2120.94	0.0433639	0.0313013	-0.424371
DUTP1	0.00865739	166.654	0.463929	0.295742	0.00446967	0.563012
DUTP2	0.072186	113.344	1.4207	0.127719	0.117208	0.273082
DUTP6	0.159999	-185.038	19.6094	0.0601992	0.126347	-0.256628
DUTP7	0.0493341	129.379	1.33809	0.159534	0.0522774	0.37553
TYMP	0.00126898	453939	4660.53	0.449929	9.82405e-05	0.729785
TK2	0.00377775	25469.3	911.476	0.358986	0.00281799	0.588105
TK1	0.32094	4148.49	1347.25	0.00116561	0.184873	0.189352
TYMS	0.00287054	-20278.2	962.886	0.381802	0.00187012	-0.608154
DPYD	0.128726	23874	1173.4	0.078267	0.0563904	0.366452
DPYD_AS1	0.137976	81.2238	0.910675	0.0705388	0.0794675	0.328768
DPYD_AS2	0.259817	-28.2568	2.64228	0.0138321	0.209095	-0.161177
DPYD_IT1	0.0310914	144.859	0.546084	0.197122	0.00862768	0.521298
DPYS	0.00279959	174584	1503.17	0.384595	0.000435278	0.672311
DPYSL2	0.17456	-35437.6	4453	0.0506574	0.111227	-0.282469
DPYSL3	0.0301332	-174964	6579.37	0.199907	0.00700224	-0.535977
DPYSL4	0.11965	-607.576	35.4057	0.0852254	0.0585361	-0.36311
DPYSL5	0.0904889	448.887	1.20959	0.110002	0.0133361	0.492529
UPB1	0.0904168	36368.5	608.656	0.110118	0.12039	0.266875
GOT1	0.208532	-15435	2208.06	0.0345143	0.116611	-0.274894
GOT2	0.0935622	-36207.4	2767.38	0.106688	0.0878491	-0.313879
GOT2P3	0.205702	42.5932	0.663271	0.0361899	0.0724324	0.338954
IL4I1	0.389122	226.745	622.983	1.43184e-05	0.22606	-0.134997
DDO	0.0668306	-2512.67	274.916	0.133819	0.0285835	-0.432613
DDOST	0.0579061	203078	7578.08	0.145429	0.0341872	0.416351
ASRGL1	0.0158947	-43671.8	1732.22	0.251079	0.023636	-0.449766
ASNS	0.305279	6402.7	1908.43	0.00487824	0.271445	0.0835376
ASNSD1	0.00697053	-28905.5	1636.62	0.313128	0.0044242	-0.564046
ASNSP3	0.230338	46.274	1.10788	0.0230342	0.138251	0.240455
ASNSP5	0.0215812	131.073	0.0222386	0.225595	0.00461339	0.561296
NIT2	0.00504243	92647.5	2085.9	0.338145	0.00136318	0.625084
GPT2	0.000867892	128702	-126.531	0.475472	1.9714e-05	0.788595
GPT	0.0365426	66308.9	295.541	0.184354	0.0216662	0.457786
ASS1	0.0653416	-87696.2	4263.71	0.13579	0.126938	-0.255291
ASS1P1	0.0137638	-2405.26	67.5424	0.261135	0.138251	-0.240366
ASS1P10	0.271646	-55.781	6.61269	0.0113964	0.249186	-0.113662
ASS1P12	0.16653	-150.63	14.6306	0.0559321	0.108191	-0.286701
ASS1P2	0.114387	414.396	13.9491	0.0896301	0.0835221	0.32123
ASL	0.0165904	14797.1	947.382	0.247384	0.0072143	0.533081
ASLP1	0.0925696	-1878.47	100.725	0.107513	0.117208	-0.272444
NAT8L	0.315002	48.0669	15.4805	0.00227684	0.292852	0.0581422
RIMKLB	0.311014	3343.08	1308.38	0.00318551	0.389615	-0.01047
RIMKLBP1	0.16261	146.759	6.00078	0.0587027	0.201329	0.167521
RIMKLBP2	0.224555	371.829	20.4712	0.0268603	0.223286	0.139007
RIMKLA	0.00295742	53013.8	-1.99346	0.378922	0.00129937	0.627535
FOLH1	0.0843153	-53099.8	2142.85	0.114717	0.216614	-0.15215
FOLH1B	0.110708	-135.648	4.80247	0.0927753	0.0927134	-0.305735
ASPA	0.0512907	-76645.8	2397.24	0.155857	0.213876	-0.1546
ALDH4A1	0.00553173	106584	303.461	0.331275	0.000138168	0.712854
GLS2	0.305279	1154.35	191.758	0.00531091	0.252803	0.109824
GLS	0.182413	-181721	13317.6	0.0467271	0.168779	-0.204723
PHGDH	0.32094	-3534.78	968.806	0.00150516	0.268022	0.0877702
PSAT1	0.00231828	47149.5	267.176	0.398593	0.000126105	0.716864
PSAT1P3	0.126155	-62.1812	3.01063	0.0805307	0.196816	-0.1737
PSPH	0.0473591	-25728	1063.19	0.163498	0.00571192	-0.548229
GCAT	0.207425	-7756.59	694.489	0.0350678	0.267156	-0.09178
ALAS1	0.135775	-9387.12	965.897	0.0721352	0.104719	-0.290488
ALAS2	0.273313	333.279	17.0431	0.0111876	0.267156	0.0911117
MAOB	0.274496	-30641.2	4527.46	0.0105754	0.299853	-0.0539096
MAOA	0.0106197	404036	2120.27	0.279958	0.00183048	0.609713
AOC3	0.116732	-17077.8	913.481	0.0875949	0.133783	-0.246603
AOC2	0.0137638	1267.55	27.4911	0.260997	0.00715104	0.53375
DAO	0.00181301	14646.7	-50.1189	0.4157	0.00169543	0.614014
GATM	0.205028	-96992.7	8068.32	0.0373033	0.187706	-0.184451
GAMT	0.259715	-24409.9	3113.73	0.0144143	0.218149	0.147472
CHDH	0.00991048	105839	775.548	0.285096	0.00708827	0.534418
BHMT	0.0496939	142539	828.748	0.1584	0.0109591	0.505235
BHMT2	0.312821	-23598.1	5904.4	0.00294364	0.218149	-0.150368
DMGDH	0.209003	20147.5	1056.67	0.0325394	0.236644	0.123636
PIPOX	0.000948623	99187.7	-383.751	0.469649	3.25925e-06	0.853197
SARDH	0.00675068	12261.7	193.499	0.315276	0.000123161	0.718201
GNMT	0.127261	259.092	16.6067	0.0795458	0.141364	0.23747
CBS	0.315002	-6720.73	1453.47	0.00219539	0.249186	0.113388
CTH	0.00491071	4842.76	80.308	0.340253	0.000229515	0.695033
CTHRC1	0.259817	-8277.34	1379.24	0.0136452	0.21301	-0.156605
SDS	0.0982488	60439.1	299.037	0.102649	0.00725674	0.532636
SDSL	0.281659	3786.35	764.148	0.00821281	0.289742	0.0677212
SRR	0.021121	-1794.21	140.708	0.227164	0.0200185	-0.464024
SRRD	0.225715	1175.37	343.781	0.0255664	0.192423	0.179773
SRRM1	0.0867816	40068.1	3364.64	0.112612	0.0700711	0.343284
SRRM1P3	0.284736	-41.5638	8.84367	0.00711979	0.276459	-0.078414
SRRM2	0.00885733	1.41933e+06	10586.8	0.293409	0.026623	0.439296
SRRM2_AS1	0.00219457	5214.05	14.9648	0.401312	0.00232431	0.597684
SRRM3	0.244245	-2642.61	200.473	0.0191191	0.218578	-0.145244
SRRM4	0.257089	80.9989	6.28855	0.0157464	0.226394	0.133883
SRRM5	0.0332756	595.978	21.0829	0.192096	0.0433319	0.394075
SRRT	0.0850217	-34232.4	5092.82	0.114148	0.0646341	-0.353308
MTR	0.203225	29813.8	2667.56	0.0382105	0.198394	0.171753
MTRF1	0.00176413	-6354.49	476.888	0.42082	0.00162617	-0.616173
MTRF1L	0.000867892	-9292.78	484.15	0.478561	9.82405e-05	-0.729339
MTRNR2L1	0.00565015	-860.035	28.8501	0.32973	0.000750523	-0.650925
MTRNR2L10	0.115346	-771.475	29.0362	0.0885107	0.00235356	-0.596636
MTRNR2L12	0.178123	-4939.52	246.848	0.0489053	0.210797	-0.159501
MTRNR2L2	0.227778	-1735.03	121.273	0.0245785	0.271534	0.0830921
MTRNR2L3	0.168992	-295.426	13.7515	0.054323	0.117774	-0.271026
MTRNR2L4	0.0532733	-270.877	11.759	0.152664	0.0802165	-0.326131
MTRNR2L6.1	0.132467	-82.7781	4.0139	0.0750961	0.054726	-0.369982
MTRNR2L8	0.224555	-1571.83	116.524	0.0264041	0.434213	0.00311874
MTRNR2L9	0.205683	-110.596	7.47731	0.0365881	0.0913308	-0.307864
MTRR	0.205683	-9683.8	1859.81	0.0366525	0.218149	-0.14814
MAT2B	0.274496	-8962.69	3465.25	0.0106468	0.411787	-0.00579194
MAT1A	0.323102	1624.99	557.73	0.000452053	0.0794298	0.32925
MAT2A	0.177826	76409.3	4920.59	0.0495936	0.101569	0.294943
AMD1	0.0031107	-75015.8	3463.92	0.375593	0.000386551	-0.676989
AMD1P1	0.16261	-69.4616	4.59707	0.0587529	0.198269	-0.172053
SRM	0.309171	14020.3	3158.53	0.00402239	0.127372	0.254845
SRMP2	0.195604	60.7889	1.95454	0.0413303	0.169859	0.203544
SRMS	0.00135167	3859.26	-2.30177	0.442535	9.81329e-05	0.730007
SMS	0.135194	-47830.1	3811.43	0.0724185	0.0550097	-0.369125
MTAP	0.135194	-6753.12	741.36	0.0725976	0.0228244	-0.453554
MTAPP1	0.225547	32.8873	1.15355	0.0256383	0.258706	0.102932
MTAPP2	0.0255349	-938.747	28.7711	0.213751	0.042944	-0.394966
MRI1	0.220895	-2216.07	718.659	0.0283092	0.213876	-0.155491
APIP	0.17456	-6502.77	911.164	0.0511714	0.126347	-0.256405
ENOPH1	0.0630718	-20966.6	2007.2	0.13896	0.048014	-0.383605
ADI1	0.0150604	127339	2892.98	0.254791	0.00299589	0.585209
TAT	0.00674151	420.944	1.09606	0.315747	0.000739779	0.651593
TATDN1	0.299695	-1799.8	714.313	0.00609367	0.236644	-0.124081
TATDN1P1	0.227066	52.2574	4.66901	0.0250285	0.258706	0.103141
TATDN2	0.32094	-411.618	699.756	0.00124712	0.449963	-0.00245044
TATDN2P1	0.00934379	-292.378	8.26578	0.289193	0.0764334	-0.333185
TATDN2P2	0.234689	-313.682	35.3824	0.0213605	0.222566	-0.14168
TATDN2P3	0.121706	62.2895	0.483209	0.0837245	0.0684955	0.347504
TATDN3	0.315002	413.544	616.725	0.00207537	0.367851	-0.0120294
DNMT1	0.32094	-4443.17	2437.44	0.00100213	0.361494	-0.0126977
DNMT3A	0.32094	529.886	795.063	0.000971924	0.325062	-0.0238361
DNMT3B	0.0190694	11759.2	165.038	0.235346	0.000446946	0.671197
AHCYL2	0.093909	20936.4	776.592	0.106264	0.0496934	0.380263
AHCYL1	0.00674151	115105	3841.2	0.315624	0.00445564	0.563378
AHCY	0.305279	9574.88	4272.98	0.00454838	0.2381	0.119626
AHCYP2	0.32094	-9.12667	2.77315	0.00159354	0.300785	0.0503677
BCAT2	0.014679	44778.6	1234.04	0.256367	0.00409448	0.567833
BCAT1	0.195604	-31299.5	2341.86	0.0420145	0.163794	-0.213188
GCLC	0.00231828	-21960.9	1404.31	0.39841	0.000168177	-0.706617
GCLM	0.0292846	24313.1	1256.35	0.202099	0.0063546	0.541992
GSS	0.00146001	99557.9	1418.1	0.437748	4.90681e-05	0.752507
CDO1	0.18548	-268.427	15.675	0.0453895	0.0077133	-0.529072
IVD	0.32094	-1915.3	3420.64	0.000656056	0.339756	0.0147026
ACAD8	0.230338	2734.56	895.5	0.0229595	0.229646	0.128759
HIBADH	0.00176413	-94512	4166.21	0.42045	0.00576711	-0.547561
AOX1	0.315002	-10548.1	2322.51	0.00273869	0.263094	-0.0969036
MCCC1	0.532076	-9.7451	1009.41	1.22287e-07	0.216614	0.15215
MCCC1_AS1	0.00761839	1381.89	2.64159	0.304947	0.0037224	0.573625
MCCC2	0.00125396	-63541.4	3050	0.450786	0.00017548	-0.70528
AUH	0.0464623	-10515.2	820.933	0.165593	0.0699815	-0.343507
AASS	0.124592	-8251.99	635.846	0.0819031	0.0794298	-0.32925
AADAT	0.30401	632.75	211.811	0.00551597	0.300785	0.0505681
DHTKD1	0.32094	-7043.23	3483.41	0.000984496	0.312378	-0.0305191
HYKK	0.0163649	-1176.09	87.9305	0.248594	0.0044242	-0.564046
PHYKPL	0.11122	86788.3	3601.3	0.0917505	0.124679	0.259524
CAMKMT	0.00533681	-8712.48	416.88	0.333933	0.000217176	-0.697261
KMT2A	0.199781	-8824.15	3034.48	0.0396035	0.126347	-0.256182
KMT2D	0.0620903	32658.9	2617.86	0.140081	0.00940449	0.514814
KMT2C	0.375883	-733.694	3071.12	0.000208926	0.272944	-0.0808644
KMT2B	0.161346	447.281	22.4512	0.0592117	0.148215	0.228559
KMT2E	0.00197614	-75147.7	6039.32	0.407747	0.0016996	-0.613723
KMT2E_AS1	0.191807	6378.77	394.03	0.0435356	0.222927	0.141011
SETD1B	0.244754	4357.56	1308.61	0.0186248	0.213876	0.154823
SETD1A	0.00736452	38603.9	1683.92	0.308071	0.00120908	0.630876
SETD7	0.235642	-12599.3	2926.32	0.0209824	0.26333	-0.0962353
PRDM9	0.257089	-19.6695	1.47654	0.0151299	0.161476	-0.215876
PRDM7	0.00241243	275.234	0.157769	0.395559	0.000261577	0.689663
ASH1L	0.166051	10016.6	2123.8	0.0561103	0.122531	0.263756
ASH1L_AS1	0.121656	1304.5	68.2078	0.0838149	0.148215	0.228782
ASH1L_IT1	0.257089	41.2734	2.57854	0.0152171	0.223286	0.139719
SMYD2	0.0832404	17296.6	1935.48	0.116273	0.0453901	0.389397
SMYD3	0.320911	1189.2	508.961	0.00181567	0.254561	0.106705
SMYD3_IT1	0.111913	122.509	1.8252	0.0910926	0.0794298	0.329302
SUV39H1	0.262129	-2087.3	374.177	0.0133957	0.325062	0.0231678
SUV39H2	0.259715	-788.169	193.629	0.0142939	0.132429	-0.249053
EHMT2	0.0623962	-48315.9	2922	0.139751	0.00406848	-0.568279
EHMT2_AS1	0.0317071	133.833	0.0716165	0.195663	0.0313013	0.424457
EHMT1	0.0699379	-12142.8	1715.6	0.130749	0.0352005	-0.414124
SETDB1	0.0258142	9759.3	810.953	0.212571	0.00881344	0.519938
SETDB2	0.0033648	-13592.1	869.389	0.368266	4.90681e-05	-0.75273
PRDM2	0.00299107	19322.1	1036.91	0.378045	2.61097e-05	0.77612
EZH1	0.0261775	35305.5	1294.81	0.211244	0.0174678	0.472934
EZH2	0.0757862	-10587.1	730.478	0.124188	0.0367476	-0.409446
SETMAR	0.00276284	-3444.41	244.086	0.385928	0.000930528	-0.641569
NSD1	0.208532	-6119.48	2758.84	0.034146	0.146878	-0.230118
SETD2	0.108113	-10412.4	1839.75	0.0949292	0.102693	-0.29383
DOT1L	0.281659	-2836.37	1425.75	0.00782684	0.272944	-0.0804189
PRDM6	0.00916269	-2680.12	108.739	0.290656	0.0107996	-0.506127
MECOM	0.00178467	-35865	1519.27	0.418132	0.00192041	-0.606817
PRDM16	0.146615	-2889.34	137.843	0.06637	0.0908481	-0.308532
TMLHE	0.0167072	-3571.77	309.294	0.246618	0.00597562	-0.545111
TMLHE_AS1	0.199846	63.6851	2.27284	0.0393956	0.239899	0.118193
BBOX1	0.0366029	-112979	3857.96	0.183845	0.0693331	-0.345512
PLOD1	0.0016594	444691	7019.52	0.425009	5.8017e-05	0.747829
PLOD2	0.0829	549536	9897.27	0.116582	0.000486182	0.668078
PLOD3	0.198864	-157206	12568.8	0.0398761	0.146858	-0.230564
COLGALT1	0.0335884	131139	5566.95	0.19118	0.00838718	0.522834
COLGALT2	0.274128	1690.39	162.933	0.0111052	0.137587	0.241257
ARG2	0.111148	9624.49	106.167	0.0920839	0.0892445	0.311205
ARG1	0.257089	61.3319	4.44499	0.0160849	0.253962	-0.107374
NOS1	0.0133219	-532.532	15.8086	0.263597	0.00628693	-0.542549
NOS1AP	0.093909	-2174.64	79.9491	0.106279	0.00299589	-0.585209
NOS2	0.0021495	-4183.25	122.681	0.402396	0.000370323	-0.678548
NOS2P3	0.10192	568.681	-1.32225	0.0995108	0.081883	0.323775
NOS3	0.0406137	-10290.4	600.957	0.175865	0.0481087	-0.383159
NAGS	0.129687	-4655.47	251.914	0.0768888	0.289742	-0.0721765
ACY1	0.00278118	11277.6	-0.0459155	0.385437	0.00181156	0.610381
ABHD14A_ACY1	0.0016594	825.033	-3.81913	0.424823	0.000124722	0.71744
CKMT1A	0.208532	-122.785	5.45797	0.0340469	0.339756	-0.0149637
CKMT2	0.0216142	17902	-60.2967	0.225382	0.0264632	0.439742
CKMT2_AS1	0.0194718	-7734.99	366.042	0.233302	0.0296856	-0.429495
CKB	0.0123136	-194792	5991.67	0.270009	0.0025023	-0.593897
CKMT1B	0.259715	-87.7094	5.32013	0.0141251	0.267156	0.0911291
CKM	0.0572069	385.71	4.2006	0.146921	0.13293	0.247494
ODC1	0.158649	-32369.7	4154.47	0.0609493	0.211521	-0.159056
AOC1	0.187204	-169962	9796.55	0.0448766	0.2381	-0.120071
SMOX	0.0191361	-43141.2	1617.18	0.234769	0.00380707	-0.572066
CNDP1	0.0182345	3391.36	31.9475	0.239299	0.00700224	0.535977
CNDP2	0.267306	118739	22676.9	0.0125852	0.179723	0.194698
CARNS1	0.271484	-1967.15	191.373	0.0115308	0.199431	0.170862
SAT2	0.000921554	-38268.7	2250.66	0.4722	0.000726619	-0.652484
SAT1	0.0941877	572403	12778.3	0.105679	0.0547324	0.369793
AGMAT	0.0366029	37949.6	413.904	0.183746	0.000672746	0.65538
OAT	0.184455	-15430.5	2137.66	0.0459516	0.0915724	-0.307196
PYCR2	0.274496	4541.8	1545.44	0.010455	0.201329	0.16908
PYCR1	0.305279	4431.83	757.369	0.00487871	0.133783	0.246603
PRODH	0.00371505	58810.6	562.073	0.360529	0.0033381	0.579417
PRODH2	0.0683607	-30147	1558.25	0.1323	0.0724442	-0.338829
ALDH18A1	0.315002	-6657.31	3328.85	0.00284529	0.272788	0.0815327
LAP3	0.315002	7124.78	3270.17	0.00216158	0.312121	-0.0365338
LAP3P2	0.315002	9.6768	1.85413	0.002338	0.268022	0.0878903
P4HA2	0.0838717	65929	2856.32	0.115525	0.0312172	0.424817
P4HA2_AS1	0.205683	146.52	5.43158	0.0364749	0.153659	0.22299
P4HA3	0.140464	18585.5	701.156	0.0692874	0.0700711	0.343061
P4HA1	0.0435759	113086	3076.6	0.170083	0.027591	0.435955
L3HYPDH	0.0182345	-6491.08	520.668	0.240036	0.0106741	-0.50724
HAL	0.117047	1153.21	23.2836	0.0873248	0.0179917	0.470707
UROC1	0.230338	-78.9757	8.56913	0.0232526	0.226394	-0.132992
AMDHD1	0.284736	1010.11	95.7028	0.007147	0.168153	0.205837
FTCD	0.0924986	50509.4	92.1555	0.107755	0.0016255	0.616396
FTCDNL1	0.0052667	2204.41	44.0292	0.335282	0.000885294	0.643574
HDC	0.0106197	-1903.09	71.3073	0.280234	0.0052443	-0.553353
HNMT	0.0301623	-113355	5642.89	0.199684	0.00491564	-0.557363
HPD	0.0517536	57618.4	127.987	0.154894	0.000571988	0.662063
HPDL	0.315002	75.8072	18.4286	0.00283314	0.231831	0.127868
HGD	0.0700719	35718.5	1574.49	0.130504	0.0792573	0.329695
GSTZ1	0.0350617	-3385.86	334.983	0.188269	0.0341872	-0.41702
FAH	0.0117084	84502.6	2736.86	0.273191	0.0158343	0.479172
FAHD1	0.0757862	73986.7	2433.52	0.124321	0.0617295	0.357764
FAHD2A	0.227778	-4329.09	878.284	0.0246012	0.201329	-0.167298
FAHD2B	0.159793	-5057.95	323.697	0.0603925	0.218149	-0.149922
FAHD2CP	0.268186	-513.192	106.138	0.0123971	0.267156	-0.0920028
TYR	0.0137638	-214.761	6.04812	0.261006	0.048014	-0.383417
TYRO3	0.315002	-3193.86	703.541	0.00284006	0.289742	-0.0612609
TYRO3P	0.0707337	383.174	4.9998	0.129299	0.0715754	0.340317
TYROBP	0.080969	133714	2439.66	0.118293	0.0363767	0.410782
TYRP1	0.257089	-72.8595	5.42846	0.0154429	0.300785	-0.047112
THA1P	0.28664	-70.1275	11.7102	0.00679749	0.300785	-0.0507909
THADA	0.31342	596.261	1317.17	0.00289206	0.267156	0.0895523
THAP1	0.00533681	-5161.31	307.232	0.333795	0.00213679	-0.601916
THAP10	0.117908	-2017.21	158.183	0.0866237	0.0694342	-0.344843
THAP11	0.289897	-2063.89	1059.21	0.00662301	0.270998	-0.085097
THAP2	0.195604	1586.44	215.934	0.0412298	0.218457	0.145467
THAP3	0.171346	4302.53	594.374	0.0530863	0.135227	0.244821
THAP4	0.249672	-10050.2	2246.98	0.0170198	0.325062	-0.0231678
THAP5	0.105453	-7987.01	1117.04	0.0970041	0.0853247	-0.318557
THAP5P1	0.274496	16.5694	1.53518	0.0104841	0.186011	0.18864
THAP6	0.32094	-298.77	569.421	0.000778625	0.300785	0.0510136
THAP7	0.278453	3860.48	1304.3	0.00908849	0.212384	0.158387
THAP7_AS1	0.309171	138.965	59.2569	0.00380515	0.312378	0.0307418
THAP8	0.198864	3504.71	350.266	0.03992	0.0743381	0.336601
THAP9	0.375883	135.187	211.274	9.54613e-05	0.186942	0.187124
THAP9_AS1	0.0809605	36210.5	1248.08	0.118438	0.124419	0.26086
THBD	0.227778	33077.2	1351.55	0.0244531	0.398511	0.00957898
THBS1	0.225715	-87840.4	7140.6	0.0255575	0.163074	-0.213856
THBS2	0.0912518	-99197.7	3942.11	0.109054	0.0809259	-0.32524
THBS3	0.00297622	41419.4	758.333	0.378455	0.0047106	0.559591
THBS4	0.244754	2220.83	52.8245	0.0186907	0.325062	0.0220539
THEG	0.121015	179.389	1.32759	0.0842094	0.213876	0.155841
THEM6	0.0435676	26326.1	1011.6	0.170354	0.0454108	0.388951
THEMIS	0.306767	-662.783	150.167	0.00438897	0.253962	-0.108488
THEMIS2	0.0415305	90402.7	1383.89	0.173673	0.000357197	0.679662
THG1L	0.000660396	-12757	623.836	0.493048	0.000186031	-0.70283
THNSL1	0.0190694	-8513.25	626.163	0.23511	0.0227727	-0.453776
THNSL2	0.178858	17664.9	1734.88	0.0482946	0.116611	0.274894
THOC1	0.121853	-7589.45	1016.02	0.0832395	0.1035	-0.292716
THOC2	0.305279	4607.23	3918.7	0.00492306	0.24895	0.114279
THOC3	0.00646035	-6737.2	409.334	0.318658	0.000726619	-0.652484
THOC5	0.014868	11761.3	1109.99	0.255635	0.000314651	0.684117
THOC6	0.0035534	55561.4	780.35	0.363914	0.000123161	0.718646
THOC7	0.0355113	-13907	1273.5	0.187322	0.00860754	-0.521497
THOC7_AS1	0.230338	43.3557	2.30671	0.0232355	0.2381	0.119871
THOP1	0.0919062	10764.9	1344.47	0.108399	0.0715754	0.340388
THPO	0.000631608	15284.3	-60.5426	0.50309	0.00117613	0.632435
THRA	0.133698	32672	2203.6	0.0744783	0.158303	0.218757
THRAP3	0.230338	14592.6	4098.8	0.0235472	0.201329	0.169303
THRAP3P1	0.274734	-16.3093	1.52484	0.0100352	0.312378	-0.0338072
THRB	0.320911	-1109.91	464.84	0.00177486	0.339756	-0.0167075
THRB_AS1	0.298664	78.8743	10.9074	0.00615579	0.262094	0.0991313
THRB_IT1	0.0576064	608.876	11.7866	0.146022	0.0773968	0.332146
THRSP	0.0359292	153.886	1.73184	0.186301	0.032424	0.42144
THSD1	0.00122593	-7560.31	266.382	0.454162	0.000245143	-0.692137
THSD4	0.125341	-35672.7	1481.18	0.081311	0.00911091	-0.517488
THSD7A	0.110203	12063.7	649.119	0.0932117	0.116611	0.274894
THSD7B	0.177826	-1593.07	72.1151	0.0493374	0.181143	-0.192471
THTPA	0.126155	-1184.19	127.656	0.0806081	0.176588	-0.197594
THUMPD1	0.375883	314.027	2545.13	4.27946e-05	0.289742	0.0661618
THUMPD2	0.000944348	-13744.9	730.699	0.470805	0.000106956	-0.725775
THUMPD3	0.32094	-647.987	694.686	0.00153595	0.275476	-0.0788595
THY1	0.00315591	-281365	7846.71	0.374543	0.0156312	-0.480954
THYN1	0.127964	-3818.78	850.501	0.0786748	0.0207816	-0.461128
DCT	0.0151899	-2120.32	72.2428	0.253942	0.161476	-0.215638
DCTN1	0.0904889	-30044.7	3671.69	0.109927	0.0525706	-0.374248
DCTN1_AS1	0.16003	87.0222	1.98021	0.060069	0.112792	0.28033
DCTN2	0.281659	7767.72	3808.58	0.00784532	0.262094	-0.0991313
DCTN3	0.00949268	-24230.7	1845.78	0.287967	0.00809685	-0.525953
DCTN4	0.0200534	-34543	2788.39	0.230939	0.0124256	-0.497439
DCTN5	0.0151215	24544.9	1342.96	0.254378	0.00065087	0.656717
DCTN6	0.0767999	-7419.69	800.678	0.122747	0.00707617	-0.534863
DDC	0.0503004	106172	958.142	0.157379	0.0272504	0.437069
DDC8	0.207658	642.224	11.1855	0.0349187	0.0522928	0.37514
DBH	0.259667	330.735	36.8503	0.0145183	0.236644	0.123858
DBH_AS1	0.375883	57.487	162.354	4.49797e-05	0.339756	-0.0149254
PNMT	0.154998	-102.918	3.76441	0.0626352	0.0693331	-0.345702
TPO	0.223128	-84.5798	5.67646	0.0275179	0.216177	-0.152489
MIF	0.0473591	524.865	24.5024	0.163425	0.0449183	0.390288
MIF4GD	0.217263	2883.78	717.238	0.0293738	0.186942	0.186233
PAH	0.153388	-7813.31	265.812	0.0634013	0.176588	-0.19804
TDO2	0.244245	-7799.19	474.964	0.0189335	0.147016	-0.229896
IDO1	0.223321	11869	536.345	0.0272491	0.300785	0.0481177
IDO2	0.375883	2.75085	9.46616	1.99966e-05	0.300785	-0.0465583
KMO	0.22147	11308.9	560.653	0.0278402	0.225383	0.136333
KYNU	0.0588071	18702	214.955	0.144397	0.0018614	0.608822
HAAO	0.168992	28377.9	934.14	0.0547255	0.167733	0.206505
ACMSD	0.0998623	32542.5	671.433	0.101711	0.0504783	0.378704
ALDH8A1	0.00334389	42994.1	-57.1565	0.369284	0.0132402	0.492983
TPH2	0.268186	-49.1625	2.86276	0.0124923	0.120524	-0.266533
TPH1	0.241943	-617.31	60.777	0.0200682	0.253962	-0.107819
ASMT	0.18321	79.5104	3.58663	0.0462614	0.186011	0.188684
AANAT	0.244245	185.831	19.6334	0.0190246	0.166168	0.20851
INMT	0.206377	-5329.28	232.888	0.0356656	0.0207816	-0.461128
GADL1	0.164054	-42.4379	1.76121	0.0571263	0.118649	-0.269554
ADO	0.110222	-7163.68	903.592	0.0931299	0.0700711	-0.343061
ADORA1	0.230338	-18301.2	1100.9	0.0230522	0.128271	0.253063
ADORA2A	0.0843153	1236.5	46.7235	0.11487	0.0773968	0.332146
ADORA2A_AS1	0.301128	1896.62	398.825	0.00585893	0.237372	0.122299
ADORA2B	0.223321	-3201.46	200.255	0.0273296	0.187706	-0.184897
ADORA2BP	0.0334369	218.568	0.216128	0.191683	0.0049546	0.556461
ADORA3	0.208532	9004.69	599.676	0.0342151	0.276559	0.0777457
FMO1	0.375883	-715.394	545.029	0.000104695	0.212384	0.158165
FMO2	0.467431	-48.3767	839.814	4.17518e-07	0.434213	0.00445534
FMO5	0.257089	-1138.72	148.104	0.0156331	0.308193	-0.0398753
FMO3	0.11499	9273.27	240.843	0.0888753	0.071899	0.33972
FMO4	0.000948623	9296.76	230.765	0.469606	6.28978e-05	0.744042
GGT7	0.210877	-7076.16	1269.91	0.031474	0.268022	-0.0873246
GGT6	0.259817	130.961	4.1329	0.0137575	0.239956	-0.117884
SCLY	0.0184458	3597.94	59.9478	0.237464	0.0264501	0.439965
TXNRD1	0.259817	33439.6	3917.91	0.0139802	0.312378	0.0336378
TXNRD3	0.126532	1862.74	169.101	0.0801014	0.0797808	0.327467
TXNRD2	0.32094	-656.928	1053.9	0.00157459	0.291558	0.0597015
SEPHS2	0.0106212	283537	2660.08	0.279557	0.000133204	0.714636
SEPHS1	0.209003	-8136.41	2056.4	0.0325138	0.21474	-0.153709
SEPHS1P1	0.184663	53.4107	1.08199	0.0457021	0.11034	0.284058
SEPHS1P4	0.0592537	67.3618	0.341657	0.143766	0.17587	0.199157
SEPHS1P6	0.134546	-163.693	10.8875	0.0735735	0.214007	-0.154155
PSTK	0.0912518	992.681	83.9834	0.108965	0.0797808	0.327467
SEPSECS	0.230338	8094.64	784.93	0.0227432	0.254561	0.106483
MARS2	0.0941877	-4415.34	259.712	0.10565	0.00775811	-0.528626
GGCT	0.0349656	-25859.5	1579.98	0.188499	0.0105669	-0.507909
CHAC1	0.00593723	6754.61	50.3832	0.325026	0.000580451	0.66095
CHAC2	0.104433	-946.053	67.2179	0.0975424	0.031204	-0.425039
OPLAH	0.000631608	81228.3	719.948	0.532749	0.00017548	0.70528
ANPEP	0.309171	-127979	27591.3	0.00361121	0.325062	0.0231678
GSTA2	0.278453	-11813.8	1180.97	0.00898175	0.325062	0.0218312
[truncated: 568 more rows]

## Sheet: Lpr
	Pearson correlations				Spearman Correlations
Gene name	Corrected p-value	Slope	Intercept	r2	corrected_spearman_P	spearman_coef
A3GALT2	0.229194	5.45899	6.77992	0.0124021	0.197778	0.16165
A4GALT	0.00670492	-4519.98	4675.36	0.284559	0.016146	-0.467285
AACS	0.0031805	1365.54	468.434	0.332258	0.000616607	0.638503
AACSP1	0.259576	64.4744	108.918	0.00632912	0.222339	0.117936
AADAT	0.289516	25.4257	214.248	0.00207136	0.262607	-0.0211794
AANAT	0.17052	16.1913	17.8621	0.0335889	0.167407	0.200647
AASDHPPT	0.0444703	-580.287	1117.68	0.148257	0.0177076	-0.460373
AASS	0.063633	-654.679	696.168	0.119892	0.049234	-0.370082
ABAT	0.00527105	3212.45	-15.4835	0.299833	0.00289005	0.5685
ABHD14A_ACY1	5.77573e-05	61.503	-8.7235	0.549046	5.68186e-06	0.784511
ABHD16A	0.212296	-26.0768	56.3961	0.0177391	0.127321	-0.249248
ABO	0.000406798	-594.194	240.716	0.451716	0.0232219	-0.43741
ACAA1	0.0898992	760.62	1161.82	0.0918789	0.011052	0.4927
ACAA2	0.00818273	-6137.19	4333.66	0.27128	0.00579814	-0.531937
ACACA	0.106491	940.458	1096.93	0.0780664	0.117864	0.26151
ACACB	0.0342658	2208.25	965.722	0.169739	0.0455389	0.378331
ACAD8	0.136769	274.88	858.996	0.0539541	0.174863	0.187716
ACADL	0.00853551	-5256.78	2761.27	0.268597	0.080611	-0.313455
ACADM	0.142726	1454.86	1294.07	0.048991	0.13617	0.238547
ACADS	0.24117	-453.976	2022.75	0.0107151	0.259908	-0.0599712
ACADSB	0.0880231	-839.144	1315.33	0.0933986	0.0308376	-0.413779
ACADVL	0.0726834	9457.91	12201	0.108537	0.055924	0.356483
ACAT1	0.00353931	-4833.97	3886.95	0.324391	7.5287e-05	-0.714749
ACAT2	0.118625	-207.815	309.814	0.0683247	0.0723098	-0.328392
ACER1	0.273073	-0.664558	2.12229	0.00268025	0.262607	0.0215369
ACER2	0.0675685	-81.8538	69.077	0.115321	0.152409	-0.215138
ACER3	0.315252	-95.0183	1757.51	0.00120906	0.259908	-0.0615317
ACHE	1.69471e-07	6217.7	-310.99	0.787005	2.90305e-08	0.901128
ACLY	0.0377899	10830.5	8077.22	0.162692	0.0174239	0.461711
ACMSD	0.0397251	2662.72	410.48	0.158369	0.0152573	0.470852
ACO1	0.010302	-3179.66	3222.36	0.256347	0.00836382	-0.510089
ACO2	0.0838024	2911.94	2394.62	0.097904	0.0311012	0.412664
ACOT1	0.273073	-36.4669	165.227	0.0044687	0.262607	-0.0550664
ACOT11	1.06394e-06	895.292	34.7734	0.721668	5.65292e-07	0.843386
ACOT12	0.0235158	23.0559	-1.35753	0.196999	0.11338	0.266428
ACOT13	0.018781	-719.09	842.138	0.215895	0.00785104	-0.514102
ACOT2	0.138863	-329.469	723.985	0.0524227	0.148745	-0.219151
ACOT4	0.922991	-0.806113	255.517	3.40265e-07	0.207398	0.141568
ACOT7	0.0321322	5821.03	1230.93	0.17434	0.00836382	0.510089
ACOT8	1.3728e-05	686.122	366.156	0.613385	3.41326e-06	0.797237
ACOX1	0.000170638	3351.56	1056.75	0.496985	3.88954e-06	0.794116
ACOX2	5.77573e-05	1035.78	-46.7768	0.548767	0.000301458	0.666148
ACOX3	0.00642389	1548.62	451.655	0.286969	0.00049472	0.646975
ACP1	0.315252	-147.149	2869.2	0.00117869	0.250643	-0.0724559
ACP2	0.0126603	2654.99	1414.17	0.242053	0.00866829	0.507191
ACP5	0.125206	3467.49	561.512	0.0628861	0.249816	0.0847176
ACSBG1	0.0248274	40.2733	7.78524	0.192644	0.0353202	0.400402
ACSBG2	0.0129095	44.5286	6.24167	0.24058	0.0103285	0.496936
ACSF3	4.3234e-06	4656.2	143.675	0.658942	1.66827e-06	0.81641
ACSL1	0.0039373	24017.9	2423.09	0.317765	0.00107013	0.615094
ACSL3	0.122825	853.001	1465.03	0.0649474	0.198396	0.158734
ACSL4	0.340799	105.036	2529.18	0.000386861	0.262607	0.0178353
ACSL5	0.122825	1851.39	1721.23	0.0649463	0.144491	0.222941
ACSL6	0.000581056	226.907	-9.69148	0.430193	2.03011e-05	0.752203
ACSM1	7.7209e-05	428.555	-8.26655	0.535301	0.000373026	0.657899
ACSM2A	0.00466716	69620.6	-3667.33	0.307649	0.00618154	0.528147
ACSM2B	0.00112085	64250.3	-5784.87	0.392499	0.00105905	0.61554
ACSM3	0.132677	-362.822	719.093	0.0568588	0.127706	-0.248579
ACSM4	0.143457	23.1647	6.76063	0.0483568	0.0630782	0.342883
ACSM5	2.35398e-05	17049.6	-1602.29	0.590146	0.000150186	0.690671
ACSS1	0.000358347	-5470.03	3788.67	0.459291	1.47937e-05	-0.762013
ACSS2	0.00672759	5435.91	892.405	0.284304	0.00628145	0.527256
ACSS3	0.0747096	-1515.39	1330.99	0.106325	0.198396	-0.159849
ACY1	0.000175401	838.244	-66.3855	0.49524	0.000189809	0.683091
ACYP1	0.00332757	-536.069	449.504	0.329389	0.00220721	-0.58143
ACYP2	0.143244	109.822	375.969	0.0484788	0.121209	0.255936
ADA	0.115352	427.969	562.526	0.0700949	0.081845	0.311449
ADAD2	0.0423489	33.5942	-1.11514	0.152403	0.0837543	0.308099
ADAL	0.157383	-78.3985	383.84	0.0407632	0.174863	-0.187939
ADAM10	0.149786	-1827.31	5410.19	0.0438059	0.121712	-0.255045
ADAM11	0.162897	-34.8354	61.658	0.0380965	0.185943	-0.171888
ADAM12	0.0979251	-2058.48	1602.56	0.0846459	0.0727246	-0.327278
ADAM15	0.273073	-968.957	4540.16	0.00485186	0.262607	0.0470406
ADAM17	0.311024	60.5938	713.961	0.00136073	0.250643	0.067997
ADAM18	0.00803168	159.594	-20.4884	0.272835	1.57159e-06	0.817786
ADAM19	0.0723668	-925.902	995.079	0.109027	0.0488997	-0.370974
ADAM1A	0.000875453	373.095	144.653	0.407084	0.00291663	0.568054
ADAM1B	0.255006	-6.01973	15.9895	0.00851347	0.262607	-0.0318806
ADAM20	0.316897	-1.16187	5.76859	0.000999126	0.499932	-0.00111471
ADAM20P1	0.0735319	10.6152	1.97811	0.107711	0.21073	0.133988
ADAM21	0.529007	-0.161195	6.19543	1.29691e-05	0.250643	-0.0740494
ADAM22	0.0256598	-2670.22	1845.41	0.189879	0.00199736	-0.586335
ADAM23	0.0035098	-220.86	98.8613	0.325475	0.000213815	-0.679266
ADAM28	0.0572182	2947.96	429.094	0.127418	0.000885258	0.623566
ADAM29	0.269737	-0.959352	2.21948	0.00522911	0.235533	-0.0952329
ADAM32	0.000602323	-113.396	77.1137	0.427096	0.000186324	-0.68376
ADAM33	0.103731	80.779	-1.84733	0.0801192	0.262607	0.0327723
ADAM7	0.167782	-12.6633	8.36831	0.0355861	0.193361	-0.16465
ADAM8	0.371485	243.718	2358.54	0.000182205	0.136871	0.235426
ADAM9	0.216646	-3060.12	7302.41	0.0155935	0.22569	-0.107681
ADAMDEC1	0.0700856	1987.49	-106.925	0.111955	0.024683	0.432506
ADAMTS1	0.345832	-319.706	3683.32	0.000324684	0.259908	0.0613088
ADAMTS10	0.169171	2052.88	2151.34	0.0342094	0.205625	0.150039
ADAMTS12	0.00875552	-1007.31	552.984	0.266906	0.00157923	-0.597482
ADAMTS13	0.0456641	404.499	176.443	0.14618	0.067456	0.336864
ADAMTS14	0.385457	39.132	752.678	9.19719e-05	0.222508	0.116375
ADAMTS15	0.103175	-1669.33	1050.56	0.0805096	0.0144695	-0.474196
ADAMTS16	0.0906923	-86.8821	67.5645	0.0912439	0.0976266	-0.288263
ADAMTS17	0.1485	-74.4236	107.751	0.0449703	0.157641	-0.210011
ADAMTS18	0.00431993	-221.084	98.6554	0.312409	0.000184072	-0.684393
ADAMTS19	0.315252	-0.608833	1.93063	0.0010881	0.250643	-0.0740506
ADAMTS2	0.000209404	-3468.26	1771.68	0.485235	9.71695e-05	-0.706054
ADAMTS20	0.188429	-2.53589	2.44269	0.0261392	0.235533	-0.0952667
ADAMTS3	0.0419153	-1216.92	651.278	0.153431	0.000750712	-0.631146
ADAMTS4	0.0858159	-5819.73	4125.86	0.095796	0.262607	-0.0240776
ADAMTS5	0.00700363	-2062.95	1186.47	0.281539	0.140805	-0.229852
ADAMTS6	0.00606883	-181.643	113.733	0.290707	0.00171416	-0.593692
ADAMTS7	0.00341094	-1959.69	1050.01	0.327645	0.0214001	-0.444767
ADAMTS7P2	0.212296	1.65538	0.655501	0.0178949	0.250643	0.0691004
ADAMTS7P3	0.364995	-0.591365	5.56159	0.000255763	0.262607	-0.0374541
ADAMTS7P4	0.26403	-20.4995	46.0923	0.00573236	0.226119	0.103222
ADAMTS8	0.24117	-12.8435	34.6112	0.0108157	0.179553	-0.179691
ADAMTS9	0.0870322	-1006.9	1561.76	0.0946982	0.090641	-0.298518
ADAMTS9_AS1	0.213144	677.389	665.334	0.0171204	0.225553	0.112585
ADAMTS9_AS2	0.229194	192.456	301.459	0.0123504	0.205625	0.150931
ADAMTSL1	0.127106	-127.131	103.492	0.0611498	0.0416574	-0.386134
ADAMTSL2	0.0843675	-260.166	195.702	0.0974326	0.176883	-0.184595
ADAMTSL3	0.142726	-906.307	1151.34	0.0492183	0.179429	-0.181474
ADAMTSL4	0.00221904	3261.32	688.232	0.353673	0.000351579	0.660129
ADAMTSL4_AS1	0.0531816	34.8258	11.0184	0.133886	0.0218605	0.442761
ADAMTSL5	0.170521	-265.974	222.941	0.0335267	0.22569	-0.109687
ADAP1	0.000496353	1287.39	4.71049	0.440413	7.65068e-05	0.71408
ADAP2	0.0342658	2301.45	815.43	0.169713	0.00546882	0.535282
ADAR	0.0196759	4022.33	6697.03	0.211707	0.0102612	0.497605
ADARB1	0.0142738	-1520.52	1283.98	0.234624	0.0737873	-0.325494
ADARB2	0.0143886	-40.8704	25.829	0.234048	0.00133715	-0.605508
ADAT1	0.00352832	779.617	673.926	0.324988	0.000332837	0.662135
ADAT2	0.0202859	-384.708	400.034	0.208987	0.0167951	-0.464163
ADAT3	0.14549	93.5567	186.917	0.0465916	0.156575	0.211348
ADCY1	0.000593327	-571.829	261.227	0.428291	0.0118992	-0.488018
ADCY10	0.000857821	-163.088	91.0785	0.408399	0.0219595	-0.442315
ADCY10P1	0.0848141	-208.334	214.153	0.0970056	0.119652	-0.257274
ADCY2	0.0428873	-488.505	244.648	0.151378	0.000326412	-0.663027
ADCY3	0.088687	918.339	749.48	0.092742	0.113522	0.266192
ADCY4	0.0377642	-1378.4	967.336	0.162808	0.0985669	-0.286479
ADCY5	0.119584	-1569.43	1092.28	0.0674861	0.168421	-0.197749
ADCY6	0.000497705	4045.28	764.336	0.439719	0.000298676	0.666817
ADCY7	0.0925313	1295.56	372.946	0.0892823	0.0266097	0.42604
ADCY8	0.0782067	230.261	-8.44589	0.102889	0.00833887	0.510316
ADCY9	0.11049	1403.2	1324.12	0.0741919	0.138906	0.232082
ADH1B	0.454974	12.4679	101.949	3.66602e-05	0.0756621	-0.321481
ADH1C	0.174573	-114.802	77.9495	0.0312017	0.198396	-0.158511
ADH4	0.0244244	9.82728	-0.257605	0.193896	0.0131372	0.481102
ADH5	0.00231026	-4988.19	5324.37	0.351169	0.000822092	-0.627133
ADH5P4	0.187244	-2.93024	7.06752	0.026362	0.222508	-0.115929
ADH6	0.202961	-119.351	180.093	0.0225375	0.203919	-0.152492
ADI1	0.00370258	9385.11	2166.66	0.321881	0.000255596	0.67239
ADK	3.3084e-05	-1015.86	840.03	0.576888	2.06371e-05	-0.751534
ADO	0.0597089	-542.455	948.58	0.124193	0.0393279	-0.391039
ADORA1	0.174573	-1402.97	1220.72	0.0315068	0.179553	0.179022
ADORA2A	0.0444703	92.3197	39.3322	0.148922	0.055825	0.357375
ADORA2A_AS1	0.224805	189.23	373.911	0.0135641	0.22569	0.111025
ADORA2B	0.147694	-271.057	228.522	0.0455626	0.116972	-0.262402
ADORA2BP	0.00924915	16.7878	-1.22408	0.262997	0.00127036	0.60787
ADORA3	0.179565	545.021	582.136	0.0291514	0.221416	0.119051
ADPGK	0.156799	1432.39	2837.12	0.0411139	0.0912741	0.297849
ADPGK_AS1	0.0782067	19.5787	4.70693	0.102857	0.0204721	0.449003
ADPRM	1.77187e-05	-696.867	403.012	0.603586	5.755e-07	-0.84138
ADSL	0.0585188	-1504.99	2156.02	0.126056	0.01966	-0.45257
AFMID	0.00597864	2601.1	623.868	0.291571	0.00368523	0.555792
AGA	0.0708949	-515.439	909.815	0.110616	0.0268931	-0.424926
AGAP1	0.00199165	4923.68	1073.79	0.360577	0.000254326	0.672613
AGAP1_IT1	0.000259513	116.239	-3.99031	0.477182	0.000197574	0.681754
AGAP10	0.255006	-0.955302	1.62464	0.00807	0.262607	-0.0482358
AGAP11	0.0883504	16.5946	1.2548	0.092996	0.250643	0.0781111
AGAP2	0.273073	40.6494	165.689	0.00477078	0.261208	0.0593023
AGAP2_AS1	0.244317	-14.4354	36.297	0.0103485	0.179553	-0.179468
AGAP3	0.216646	844.837	3871.21	0.0157782	0.199093	0.157619
AGAP4	2.47248e-06	-223.302	101.982	0.699325	1.02283e-07	-0.8717
AGAP5	0.0128377	42.2016	2.41584	0.240945	0.0177076	0.460373
AGAP6	0.529007	3.26123	456.556	5.13565e-06	0.262607	0.0532829
AGAP7	0.0870322	38.6148	5.66534	0.094776	0.00231196	0.579424
AGAP8	0.0735728	167.049	64.9075	0.107607	0.067456	0.336641
AGAP9	0.137567	29.5491	14.4354	0.0532261	0.140805	0.229629
AGK	0.245909	-284.692	1325.33	0.0102193	0.249816	-0.0840488
AGL	0.00137102	790.875	652.67	0.380642	0.000549114	0.643185
AGMAT	0.01451	2804.4	195.325	0.233364	0.000111675	0.70115
AGPAT1	0.0350457	-619.066	1059.03	0.168179	0.0263983	-0.426709
AGPAT2	0.132015	1635.6	2425.84	0.057287	0.174863	0.188162
AGPAT3	0.00917063	4201.37	3158.37	0.263835	0.000745984	0.631592
AGPAT4	0.00562191	-553.427	508.744	0.295459	0.00197116	-0.587227
AGPAT5	0.207668	-313.894	1170.96	0.0195906	0.222508	-0.115706
AGPS	0.0129421	-3171.61	3331.23	0.240332	0.00241325	-0.577194
AGXT	0.000586912	922.732	-111.285	0.429096	0.000100874	0.704494
AGXT2	0.0496824	4630.92	511.446	0.140018	0.0621279	0.345113
AHCY	0.273073	552.445	4262.05	0.00352143	0.251303	0.0668823
AHCYL1	0.00344259	7680.47	3413.57	0.326819	0.00612437	0.528816
AHCYL2	0.0166748	1991.09	529.453	0.223521	0.00980928	0.50028
AHCYP2	0.273073	-0.985158	2.91429	0.00431818	0.262607	0.0539758
AK1	0.00453971	-170.633	192.437	0.309425	0.00345214	-0.559136
AK2	0.000190329	10509.4	3000.8	0.489718	3.184e-05	0.739719
AK3	0.00491669	-2511.85	2364.6	0.304445	0.0230866	-0.438302
AK3P2	0.0622559	10.3609	0.0123229	0.121402	0.107334	0.274327
AK3P3	0.26403	-3.77153	11.3797	0.00564488	0.209912	-0.135325
AK3P5	0.0206361	15.8622	0.714529	0.207608	0.0162483	0.466764
AK4	0.00214167	10720.6	1916.48	0.355927	1.80682e-05	0.755101
AK4P1	0.000334736	63.6657	-2.32151	0.46332	1.75955e-05	0.756439
AK4P3	0.00583993	10.1141	-0.0497753	0.293094	0.00749812	0.517018
AK4P4	0.0782067	4.69142	-0.0305546	0.102765	0.202236	0.153927
AK5	0.0510604	-104.512	76.3117	0.136934	0.000992563	-0.618216
AK7	0.000400492	-278.5	158.902	0.453415	0.00651313	-0.525026
AK8	0.0268234	-310.938	223.746	0.186953	0.185593	-0.172556
AK9	0.00625781	-877.193	621.479	0.288876	0.172901	-0.192621
AKR1A1	0.000895845	18865.3	1861.02	0.405751	1.57162e-05	0.759783
AKR1B1	0.248684	-6180.53	10330.2	0.00994112	0.168221	0.198418
AKR1B10	0.141938	199.317	40.782	0.0496263	0.182389	0.175009
AKR1B10P1	0.229194	1.13652	0.780967	0.0124687	0.12257	0.253776
AKR1B15	0.0410747	34.4106	-2.36345	0.155756	0.071537	0.329539
AKR1B1P1	0.273073	-0.774073	1.47902	0.0041454	0.27276	-0.0102325
AKR1B1P7	0.174573	-4.65985	3.76898	0.0319292	0.207398	-0.143785
AKR1C1	0.0668267	1317.73	656.079	0.116485	0.0640534	0.341546
AKR1C2	0.0269002	991.558	-10.6828	0.18652	0.0059005	0.530823
AKR1C3	0.0688532	5974.14	3347.6	0.113929	0.141577	0.228069
AKR1C4	0.000363021	190.556	-21.8664	0.458644	0.000349035	0.660422
AKR1D1	0.273073	2.43609	3.26853	0.00393629	0.222508	-0.11669
AKR7A2	0.0961325	3410.68	1585.43	0.0865282	0.0336718	0.40553
AKR7A2P1	0.0709193	22.9034	3.76061	0.1104	0.0770698	0.319617
AKR7A3	0.236832	-387.856	481.145	0.0112528	0.207398	-0.143797
AKR7L	0.273073	53.3818	74.9845	0.00294113	0.173509	0.190615
ALAD	0.000349608	-1971.02	2107.58	0.460426	3.55899e-05	-0.736597
ALAS1	0.0822637	-722.815	1028.27	0.0994693	0.0755838	-0.321704
ALAS2	0.26403	15.6809	17.6742	0.00575992	0.222508	0.114815
ALDH18A1	0.208903	-1136.53	3550.94	0.0192861	0.262607	-0.0254153
ALDH1A1	0.00156724	-41227.6	22370.2	0.373572	0.000220097	-0.677964
ALDH1A2	0.0103851	282.04	56.5115	0.255318	0.00447701	0.546206
ALDH1A3	0.00156724	-1028.32	575.212	0.373716	0.000216371	-0.678856
ALDH1B1	0.000109658	-1201.14	834.524	0.519868	1.61031e-05	-0.758891
ALDH1L1	0.294797	-458.419	2109.46	0.0017529	0.205646	-0.148925
ALDH1L1_AS1	0.273073	-1.3764	3.16139	0.00253231	0.138522	-0.232828
ALDH1L1_AS2	0.251158	-28.7413	28.2335	0.00934492	0.250643	0.0829341
ALDH1L2	0.0831075	673.543	49.8045	0.0985121	0.209912	0.137109
ALDH2	0.294797	-775.195	6387.34	0.00171599	0.262607	-0.0334412
ALDH3A1	0.221928	-55.0225	101.704	0.014366	0.206412	-0.145135
ALDH3A2	0.000450134	-13850.3	7585.47	0.444901	0.000127053	-0.696468
ALDH3B1	0.000381254	6857.54	1719.62	0.456159	0.00111887	0.613088
ALDH3B2	0.273073	-0.608206	1.14178	0.00315328	0.262607	-0.0319292
ALDH4A1	0.000447683	8102.67	-374.95	0.445258	6.55853e-06	0.781186
ALDH5A1	0.00137102	-3075.32	1924.21	0.38088	0.000475368	-0.648759
ALDH6A1	0.364995	65.3455	804.392	0.000245354	0.22569	0.109241
ALDH7A1	0.00526497	-4670.48	4507.61	0.299984	0.00147101	-0.600603
ALDH7A1P1	0.0365329	-14.3454	12.4188	0.165645	0.0221086	-0.441646
ALDH8A1	6.73677e-05	3415.4	-372.7	0.541973	0.000811857	0.628025
ALDH9A1	0.0226632	-4269.74	3573.78	0.200344	0.00147101	-0.600603
ALDOA	0.00208691	212376	28350.2	0.358118	3.19796e-06	0.798798
ALDOAP1	0.0972635	5.01428	0.822352	0.0855461	0.0203381	0.449559
ALDOAP2	0.371485	-0.419093	4.34103	0.000221499	0.211487	0.130658
ALDOB	0.22458	1668.92	489.622	0.0137774	0.21073	0.133765
ALDOC	0.259957	-947.234	2268.7	0.00628017	0.262607	0.0468176
ALG1	0.000953718	1875.32	428.533	0.402361	8.99123e-06	0.774051
ALG10	0.000581056	164.707	42.764	0.430002	1.56887e-05	0.760006
ALG10B	0.208903	30.3628	106.104	0.0189191	0.202236	0.154944
ALG11	0.0701666	-95.8798	183.591	0.1116	0.0756621	-0.321258
ALG12	0.00113936	1217.31	334.184	0.39157	3.87587e-06	0.794339
ALG13	0.0700395	869.874	1080.64	0.112388	0.140295	0.230967
ALG13_AS1	0.0424666	44.9028	6.57601	0.152041	0.0355801	0.399733
ALG14	0.131251	-206.212	432.605	0.0579964	0.134206	-0.241222
ALG1L	0.0987822	-9.76837	11.6094	0.0838787	0.168421	-0.19708
ALG1L10P	0.144028	9.52712	9.75573	0.0476634	0.174106	0.189723
ALG1L11P	0.00138212	-13.9803	6.28978	0.380076	0.00366856	-0.556061
ALG1L12P	7.4688e-05	-15.7863	7.68166	0.537892	2.3551e-05	-0.747959
ALG1L13P	6.07586e-05	180.782	-13.7303	0.54604	7.2115e-05	0.715864
ALG1L15P	0.147694	2.75534	1.36787	0.0454137	0.167407	0.201094
ALG1L2	0.0227636	24.5627	8.42316	0.199831	0.0346555	0.402632
ALG1L3P	0.0720306	-2.05961	1.3272	0.109408	0.132672	-0.243253
ALG1L6P	3.14e-06	277.198	-33.1861	0.6862	1.75955e-05	0.755993
ALG1L7P	0.0375782	23.5578	-0.417446	0.163223	0.0130449	0.481643
ALG1L8P	0.0102491	12.8808	1.07929	0.256871	0.00370842	0.55537
ALG1L9P	0.216646	3.61426	7.03228	0.0161461	0.211252	0.131535
ALG2	0.00129871	-1290.12	1466.53	0.384328	0.0221225	-0.441423
ALG3	0.321847	120.21	1501.69	0.000560104	0.259908	0.0615317
ALG3P1	0.174573	-1.49769	1.26729	0.0316043	0.22569	-0.108644
ALG5	0.00221956	-2461.16	2174.33	0.353553	0.00390291	-0.552671
ALG6	0.128744	307.756	520.954	0.0600716	0.111484	0.269536
ALG8	0.529007	-5.34291	1076.47	7.15057e-06	0.262607	0.0445882
ALG9	0.00343609	476.948	153.842	0.327111	0.00395794	0.552002
ALG9_IT1	0.316897	0.385545	2.27727	0.000946008	0.250643	-0.0809636
ALLC	0.0379334	12.4561	1.87477	0.162281	0.0499668	0.367894
ALOX12	0.180509	79.5087	185.162	0.0288857	0.171993	0.194182
ALOX12B	0.171174	-142.135	127.297	0.0329227	0.207398	-0.14023
ALOX12P1	0.167492	-1.55909	1.27899	0.0357658	0.221298	-0.119344
ALOX12P2	0.0433138	210.844	93.2177	0.150713	0.0825416	0.310334
ALOX15	0.193034	-3.41726	3.32293	0.025025	0.173581	-0.190418
ALOX15B	0.0700395	464.232	79.1335	0.112394	0.0468854	0.37521
ALOX5	0.00050942	7510.97	740.874	0.438472	0.000587486	0.64051
ALOX5AP	0.316897	390.354	1362.57	0.000971742	0.170816	0.195296
ALOXE3	0.139876	-37.3343	23.7748	0.051796	0.103527	-0.278631
ALPI	0.0414739	270.105	-34.8777	0.154721	0.0336674	0.405836
ALPL	0.248684	-487.351	671.496	0.00975645	0.262607	0.0258612
AMACR	0.229194	-58.5297	221.408	0.0120836	0.111055	-0.269982
AMD1	0.000259513	-5542.35	3895.66	0.476817	0.000101415	-0.704271
AMD1P1	0.0743994	-6.14197	5.28475	0.106833	0.143992	-0.224602
AMDHD1	0.227461	89.1294	85.7559	0.0129413	0.142719	0.226508
AMDHD2	4.48372e-06	3306.94	133.647	0.656985	2.04375e-06	0.811283
AMPD1	0.0379334	81.7279	-5.20929	0.162286	0.0413662	0.386751
AMPD2	0.0070242	2917.09	1399.5	0.281116	0.0102716	0.497382
AMPD3	0.00149852	3565.97	-3.56179	0.375965	1.17493e-07	0.867464
AMT	0.000186147	2629.31	40.056	0.492419	0.000407598	0.654778
AMY2B	0.0597089	783.606	191.559	0.124523	0.179553	0.180359
ANPEP	0.255006	-13028.3	29346.4	0.00870368	0.240009	-0.0914058
AOC1	0.134732	-12431.9	10739	0.0558394	0.250643	-0.0753541
AOC2	0.00323307	93.6313	20.2012	0.331207	0.00107464	0.614872
AOC3	0.0701666	-1264.43	1012.53	0.111674	0.144491	-0.222941
AOX1	0.316897	-326.818	2254.23	0.00061145	0.262607	-0.0236318
APIP	0.112917	-507.519	956.308	0.0724913	0.0804497	-0.31457
APRT	0.000428917	14714.4	1139.34	0.448557	2.16589e-06	0.809499
ARG1	0.273073	2.08173	4.79031	0.00430969	0.250643	-0.0784753
ARG2	0.0870322	639.659	71.1354	0.0945967	0.0669465	0.337533
ARSA	1.30414e-06	7573.98	856.718	0.714964	2.86425e-06	0.802365
ARSB	0.122862	905.446	1113.1	0.0645134	0.136871	0.235426
ASAH1	0.259153	1834.54	5903.5	0.00652429	0.27276	0.0102553
ASAH2	4.18628e-06	-40.7202	18.8731	0.667598	1.9103e-05	-0.753659
ASAH2B	0.0612247	63.6671	114.493	0.122546	0.0755838	0.321927
ASH1L	0.0969607	812.729	2045.43	0.0859108	0.11869	0.259058
ASH1L_AS1	0.0855173	91.707	62.032	0.0963367	0.107898	0.273772
ASH1L_IT1	0.212296	2.91263	2.37998	0.0176244	0.211252	0.131905
ASL	0.00456707	1084.32	864.764	0.308949	0.00166358	0.59503
ASLP1	0.0668922	-128.016	108.466	0.116128	0.144491	-0.223164
ASMT	0.212434	3.18253	3.8964	0.0172372	0.209036	0.138892
ASMTL	0.00189078	-946.702	1006.7	0.363514	2.23197e-06	-0.80883
ASMTL_AS1	0.000400625	1657.04	-82.5228	0.453141	0.000220097	0.677964
ASNS	0.371485	82.2302	1982.99	0.000187133	0.262607	0.01516
ASNSD1	0.000472059	-2253.55	1836.6	0.442636	0.000549114	-0.643185
ASNSP3	0.206536	2.8284	1.00987	0.020014	0.174106	0.189842
ASNSP5	0.0106774	9.10817	-0.567983	0.253349	0.0012728	0.607645
ASPA	0.0354746	-5206.02	2708.15	0.16723	0.222339	-0.117936
ASPDH	0.00136741	1832.17	-176.607	0.381341	0.00098644	0.618662
ASRGL1	0.00570846	-3101.69	1947.96	0.294549	0.0214001	-0.444545
ASS1	0.0342307	-6431.82	4754.92	0.169874	0.103527	-0.278676
ASS1P1	0.00313909	-178.181	81.5206	0.333284	0.179553	-0.179468
ASS1P10	0.263644	-2.61089	6.50318	0.00580664	0.249816	-0.0858705
ASS1P12	0.0846946	-13.019	16.0364	0.0971727	0.0621279	-0.346228
ASS1P2	0.0350457	37.2129	9.6838	0.168097	0.0353079	0.400625
ATIC	0.162897	-1350.15	2864.08	0.0382889	0.197778	-0.161409
ATP6AP1	0.26403	697.746	5980.7	0.00568486	0.253018	0.0653217
ATP6AP1L	0.125636	-233.382	365.53	0.0626745	0.205978	-0.147587
ATP6AP2	0.385457	-115.038	6281.31	8.47508e-05	0.202236	-0.154275
ATP6V0A1	5.49207e-05	6904.35	1643.39	0.551872	7.13435e-05	0.71631
ATP6V0A2	0.316897	24.9833	622.388	0.000597837	0.262607	0.0231859
ATP6V0A4	0.147694	-7.20854	5.80673	0.0453364	0.142746	-0.226343
ATP6V0B	0.00051987	10396.7	2153.64	0.436733	2.85913e-05	0.743063
ATP6V0C	8.34806e-06	171.807	-0.768515	0.636608	1.30753e-05	0.765134
ATP6V0CP1	0.0230324	29.1631	0.879241	0.198728	0.0262025	0.427345
ATP6V0CP3	0.232254	1.31419	1.02423	0.0117217	0.262607	0.0357045
ATP6V0D1	0.000850991	6107.01	1913.55	0.408851	7.84787e-05	0.713189
ATP6V0D2	0.206536	-33.1381	34.2414	0.0204105	0.127835	-0.248356
ATP6V0E1	0.129691	3172.57	4875.25	0.0590122	0.118954	0.258166
ATP6V0E1P1	0.0188436	21.2437	0.992397	0.21564	0.0391504	0.391436
ATP6V0E1P2	0.1485	7.82645	4.14233	0.0449188	0.149907	0.217591
ATP6V0E2	0.0373768	1491.61	747.873	0.163579	0.0620321	0.34645
ATP6V0E2_AS1	0.162044	-35.0395	60.3968	0.0387284	0.182621	-0.17434
ATP6V1A	0.00358715	4003.25	1759.37	0.323613	0.000865986	0.624458
ATP6V1B1	0.25559	18.1031	28.7483	0.00733108	0.231592	0.0989858
ATP6V1B2	0.16565	2566.83	4012.47	0.036356	0.150434	0.217145
ATP6V1C1	0.000380092	6606.4	1106.5	0.456436	1.57534e-05	0.75956
ATP6V1C2	0.316897	8.26799	62.0638	0.00102611	0.150542	0.216476
ATP6V1D	0.248684	-255.949	1436.83	0.00992782	0.250643	-0.075577
ATP6V1E1	0.141008	1625.91	4292.92	0.0505476	0.0621279	0.346228
ATP6V1E1P1	0.174573	-1.89646	2.19438	0.0313068	0.232933	-0.0970874
ATP6V1E2	0.0151082	332.287	223.13	0.230558	0.0308376	0.413779
ATP6V1F	0.137567	-2140.52	3281.85	0.0533883	0.13617	-0.238324
ATP6V1G1	0.0150086	-2868.77	3579.02	0.231064	0.0195359	-0.453016
ATP6V1G1P2	0.0446273	12.8993	-0.293491	0.147862	0.0207584	0.447628
ATP6V1G1P4	0.0423489	17.2897	3.5905	0.152355	0.0488925	0.371197
ATP6V1G2.1	0.0419153	-42.5639	29.0767	0.153393	0.0613628	-0.347788
ATP6V1H	0.00456707	4584.61	664.997	0.308913	0.000147355	0.69134
ATP8A1	0.0695643	-667.352	762.035	0.112884	0.0248725	-0.431391
ATP8A2	0.10806	-1209.51	704.577	0.0765816	0.000894661	-0.622897
ATP8A2P2	0.0421692	-20.9745	11.2558	0.152801	0.191845	-0.168482
ATP8B1	0.00324182	-3245.82	1849.43	0.330877	0.000113272	-0.700704
ATP8B2	0.0390685	-834.073	1068.48	0.159771	0.0229329	-0.438971
ATP8B3	0.0496824	3384.38	483.584	0.140206	0.0105551	0.495598
ATP8B4	0.0309983	911.949	105.542	0.17667	5.03733e-05	0.726788
ATP8B5P	0.144028	25.447	18.5068	0.0476649	0.156947	0.210902
AUH	0.0207705	-770.954	879.76	0.207023	0.0495694	-0.36919
B3GALNT1	0.0690703	-1262.37	1446.56	0.113389	0.0525118	-0.363171
B3GALNT2	0.0636776	-157.772	256.724	0.119718	0.0319631	-0.410657
B3GALT1	0.175644	-10.535	12.8893	0.0303306	0.0825416	-0.310557
B3GALT2	0.144774	-16.6518	24.5746	0.0471278	0.207398	-0.142459
B3GALT4.3	0.000317965	-571.215	455.267	0.46727	8.36641e-05	-0.711182
B3GALT5	0.11326	-1215.92	780.652	0.0716736	0.0434931	-0.382344
B3GALT6	0.0545781	1104.99	1114.92	0.130977	0.0777634	0.318583
B3GAT1	0.262466	-30.6387	101.979	0.00587915	0.216757	-0.127968
B3GAT2	0.292982	-4.80687	19.3857	0.00190168	0.262607	-0.0229629
B3GAT3	0.00204382	6664.33	1452.29	0.359136	6.76985e-06	0.780071
B3GNT2	0.0276644	-1040.83	1551.19	0.184631	0.102005	-0.28046
B3GNT3	0.0516375	2619.24	559.35	0.135892	0.0232219	0.43741
B3GNT4	0.00106788	2238.33	8.61206	0.395216	0.00137061	0.604393
B3GNT5	0.120795	-544.095	664.167	0.0665642	0.0836509	-0.30855
B3GNT7	0.137567	232.548	146.519	0.0533838	0.0744831	0.323488
B4GALNT1	0.103946	-636.449	434.35	0.079724	0.0138315	-0.47754
B4GALNT2	0.123658	12.8688	0.979181	0.0636495	0.182389	0.174987
B4GALNT3	0.136684	-141.492	126.392	0.0541828	0.0568203	-0.354922
B4GALNT4	0.000523028	4758.35	-144.208	0.436355	0.000146583	0.691563
B4GALT1	0.212296	2963.01	5664.81	0.0176541	0.08054	0.314124
B4GALT2	0.0949765	2194.65	1461.34	0.0873099	0.167407	0.20087
B4GALT3	0.0797119	-497.645	1557.09	0.101386	0.0572713	-0.354253
B4GALT4	2.14395e-05	3886.21	291.633	0.595635	1.51848e-06	0.81864
B4GALT5	1.06599e-05	9087.29	1270.27	0.6272	2.29826e-07	0.8581
B4GALT6	3.82318e-06	-1797.07	793.91	0.674857	5.67689e-07	-0.842271
B4GALT7	0.00528448	7274.12	655.914	0.299325	2.45894e-05	0.746853
BAAT	0.136991	-224.461	150.736	0.0536316	0.262607	-0.0519453
BBOX1	0.0206361	-7871.65	4372.64	0.207559	0.0661386	-0.338648
BCAT1	0.121948	-2564.57	2593.86	0.0655998	0.11869	-0.25928
BCAT2	0.00399357	3264.12	988.932	0.316814	0.000829265	0.626687
BCKDHA	0.148074	-9.08141	13.9875	0.0451389	0.121257	-0.25549
BCKDHB	0.00177103	-909.575	855.566	0.367122	0.00274578	-0.571175
BDH1	0.00105373	447.91	21.904	0.396131	9.73272e-05	0.705831
BHMT	0.0103314	11882.9	-376.945	0.256026	0.00150402	0.599489
BHMT2	0.316897	-924.496	5806.75	0.00105074	0.209912	-0.137778
BLVRA	6.04067e-05	-4117.46	3356.17	0.546759	7.61e-05	-0.714303
BLVRB	0.259312	-1281.69	4581.81	0.00642175	0.216757	0.127968
BPGM	1.72111e-05	-1581.09	1278.65	0.604933	1.43814e-05	-0.762681
BPNT1	0.142726	-357.817	1071.61	0.0491583	0.068353	-0.334635
BST1	0.00260749	677.282	160.347	0.344513	0.000864693	0.624904
BTD	0.229194	-94.9417	456.26	0.0122677	0.13825	-0.233865
C1GALT1	0.0652916	-1511.86	2154.44	0.118179	0.176883	-0.184149
C1GALT1C1	0.273073	-111.008	886.809	0.00493093	0.216757	-0.127745
CA1	0.364995	-5.96282	24.8367	0.000260224	0.207398	0.142013
CA10	0.160596	-2.02011	1.80478	0.0395368	0.168221	-0.198603
CA11	0.0269002	-522.058	444.282	0.18657	0.0302445	-0.415562
CA12	0.000331914	123926	9798.98	0.463967	2.71634e-06	0.804371
CA13	0.206536	-169.216	427.677	0.0201511	0.222508	-0.115483
CA14	0.054069	-110.008	103.585	0.132307	0.047449	-0.373872
CA15P1	0.0970242	27.8053	10.8394	0.0858069	0.0741701	0.324156
CA2	5.77573e-05	-10513.5	6011.33	0.549261	0.000291179	-0.667709
CA3	0.316897	5.0717	46.1413	0.000775374	0.262607	0.0169435
CA4	0.0443265	-412.234	178.654	0.149294	0.00226751	-0.580316
CA5A	0.0149804	7.25451	-0.0878774	0.231246	0.00980928	0.500509
CA5B	0.0714713	-269.43	341.76	0.109866	0.0559152	-0.356929
CA5BP1	0.0155958	365.274	357.217	0.227756	0.0305728	0.41467
CA6	0.529007	0.202975	7.42082	1.92862e-05	0.262607	0.0477094
CA7	0.177476	-1.84176	1.67515	0.0296599	0.198396	-0.158624
CA8	0.316897	6.78864	30.0098	0.000839325	0.262607	0.0365623
CA9	0.0230324	-9592.32	7446.24	0.198601	0.0688381	-0.333743
CAD	0.174573	729.868	1789.92	0.0319617	0.16796	0.199086
CADM1	0.23541	-570.505	1669.01	0.0113894	0.262607	0.0510535
CADM3	0.529007	-2.7133	94.7594	1.40488e-05	0.0906163	0.29941
CADM4	0.24389	-293.484	643.297	0.0104147	0.262607	-0.037677
CADPS	0.107016	-24.0786	15.7316	0.0777014	0.00105905	-0.615609
CADPS2	0.0508697	-2343.79	2354.84	0.137757	0.00775025	-0.515217
CAMKMT	0.00190285	-595.624	453.318	0.362971	1.75955e-05	-0.756439
CANT1	0.255006	419.06	2265.96	0.00788099	0.250643	0.0800359
CARNS1	0.224805	-139.99	201.17	0.013581	0.231592	0.100546
CAT	0.0833423	2836.01	2677.23	0.0982426	0.0211967	0.446105
CATSPER1	0.122825	86.5205	29.0975	0.0649175	0.0928657	0.29562
CATSPER2	0.000812933	1423.27	26.5447	0.411469	0.00250577	0.575411
CATSPER2P1	1.41487e-05	721.848	-41.6435	0.612084	0.000143337	0.692232
CATSPER3	0.000170638	-182.846	89.5237	0.496896	0.00101422	-0.617324
CATSPERB	0.135784	-27.3182	35.3561	0.0553135	0.179511	-0.181028
CATSPERD	0.248684	2.44813	3.74626	0.00992533	0.198396	0.158734
CATSPERG	1.22226e-05	526.911	24.6009	0.620093	3.50498e-07	0.850297
CBR1	0.122825	1834.25	1985.45	0.0647526	0.113522	0.266192
CBR3	0.000581056	-645.122	306.055	0.430259	6.70543e-06	-0.780517
CBR3_AS1	0.0166725	-57.5972	57.5995	0.223616	0.013227	-0.480661
CBR4	0.0433993	-480.279	1006.84	0.150532	0.0317925	-0.411103
CBS	0.255006	-867.811	1597.99	0.00851296	0.262607	0.0494929
CD38	0.141125	633.402	273.389	0.0503086	0.0999048	0.28425
CDA	7.65735e-05	8833.48	-943.789	0.536068	8.48944e-05	0.710736
CDADC1	0.00113992	-847.226	606.505	0.391428	0.0232313	-0.437187
CDAN1	0.164552	120.172	661.261	0.0372115	0.220133	0.123509
CDIPT	0.00113992	12599.6	2696.74	0.39143	9.9384e-06	0.771822
CDIPT_AS1	0.000942523	76.6059	-8.19954	0.403306	2.28644e-06	0.808251
CDO1	0.148878	-17.4165	16.5313	0.0444402	0.00507399	-0.539072
CDS1	0.251158	228.707	441.12	0.00926047	0.262607	-0.0245235
CDS2	0.0725449	-1681.18	2158.56	0.10883	0.0497505	-0.368299
CEL	0.135784	-29.1043	31.2982	0.0553076	0.206412	-0.145803
CELA1	0.0533953	11.6228	-0.328176	0.133433	0.0621279	0.34552
CELA2A	0.00528448	15.8122	0.0880169	0.299245	0.0245092	0.433111
CELA2B	8.43214e-06	110.414	-11.8674	0.635696	4.40834e-06	0.790772
CELF1	0.047518	1560.23	3874.21	0.14346	0.0416574	0.386134
CELF2	0.143872	1329.88	1095.1	0.0480493	0.11869	0.259726
CELF2_AS1	0.174573	44.1814	6.1377	0.0311254	0.00323142	0.56248
CELF3	0.00709416	11.5563	0.900205	0.280361	0.00162964	0.596099
CELF4	0.0298947	345.929	9.98401	0.179816	0.00859944	0.508083
CELF5	0.141125	107.505	47.6828	0.0504011	0.113276	0.267083
CELSR1	0.0323989	4814.68	5262.62	0.173735	0.0116269	0.489802
CELSR2	0.142726	-1660.03	2468.6	0.0490705	0.207398	-0.142013
CELSR3	7.53842e-06	846.529	10.8968	0.640549	9.30436e-06	0.77316
CEPT1	2.63754e-05	1944.42	334.821	0.586103	6.5656e-07	0.836475
CERK	0.227091	-549.753	2245.04	0.0131786	0.227668	-0.10233
CERKL	0.157383	-400.624	842.618	0.0409232	0.172901	-0.192621
CERS1	0.0662629	-22.1825	13.0513	0.11706	0.00717399	-0.519495
CERS2	0.00528448	7046.99	2246.08	0.299197	0.000164975	0.687773
CERS3	0.10806	14.272	6.92514	0.0765045	0.067456	0.336864
CERS4	0.0688001	1680.86	1799.54	0.114121	0.0468854	0.37521
CERS5	0.126807	-824.425	2197.48	0.0615612	0.205625	-0.149593
CERS6	0.168103	322.761	467.009	0.0348963	0.136852	0.235872
CERS6_AS1	0.216646	2.05066	2.74156	0.015871	0.250643	0.0813825
CES1	0.11344	-77.1369	51.309	0.0714347	0.0682525	-0.334858
CES2	0.00672759	61638.3	-2192.4	0.284271	0.00108825	0.614203
CH25H	0.0630777	296.244	-1.79155	0.12067	0.0389762	0.39193
CHAC1	0.00074573	501.227	10.8872	0.416234	0.000185964	0.683983
CHAC2	0.0505243	-73.9353	73.8139	0.138554	0.0203442	-0.449449
CHDH	0.00124833	8080.27	92.1214	0.386456	0.000946383	0.620222
CHIAP3	0.0301736	8.00885	0.0415551	0.179122	0.0207584	0.447662
CHIT1	0.206174	-75.1786	104.95	0.021384	0.229235	-0.101438
CHKA	0.371485	-11.3669	456.757	0.000179792	0.250643	-0.0746853
CHKB	0.0153127	111.979	15.0267	0.229623	0.0356483	0.39951
CHKB_AS1	3.78948e-05	375.922	1.74155	0.570412	2.07059e-06	0.810391
CHPF	0.000132813	29374.6	305.668	0.509083	1.69048e-06	0.815964
CHPF2	0.16337	-1056.17	2793.46	0.0377255	0.194829	-0.163416
CHPT1	0.00971705	3714.27	520.769	0.260292	0.00372331	0.555123
CHST1	0.00170359	-2601.04	1174.07	0.369535	0.0229329	-0.438971
CHST10	0.00353931	-704.963	539.741	0.324681	0.0441766	-0.380783
CHST11	0.0263	5558.37	1208.36	0.18829	0.0126865	0.483782
CHST12	4.07328e-07	-2395.75	1805.63	0.761972	9.7376e-08	-0.874598
CHST13	0.00101578	4612.33	-2.04029	0.398375	5.41518e-06	0.785644
CHST14	0.273073	165.315	1487.62	0.00307239	0.22569	0.107458
CHST15	0.0298947	3525.42	2685.85	0.179845	0.0219595	0.442315
CHST2	0.0334695	-1597.62	1417.25	0.171516	0.0797985	-0.315685
CHST3	0.0177746	-5629.84	3481.06	0.219359	0.000792449	-0.62914
CHST4	0.148878	-43.8666	37.2874	0.0444771	0.0887351	-0.301416
CHST6	0.202961	6.33485	3.91558	0.0221149	0.173001	0.191273
CHST7	1.06899e-05	-1242.64	705.027	0.625468	4.30936e-07	-0.847176
CHST8	0.0197501	16.5864	0.899409	0.211283	0.0252174	0.430101
CHST9	0.0301736	-1131	570.694	0.179074	0.000313916	-0.66481
CHSY1	0.00760095	-3278.53	3162.98	0.276032	0.0423867	-0.384573
CHSY3	0.00190285	-774.265	488.897	0.363123	0.000298676	-0.666817
CKB	0.00313491	-14196.3	7057.07	0.333536	0.000277748	-0.669715
CKM	0.0813536	20.8823	4.15149	0.100154	0.140805	0.229852
CKMT1A	0.147694	-9.30998	6.23256	0.0455232	0.250643	-0.0797153
CKMT1B	0.216565	-6.18488	5.74074	0.0163347	0.259908	0.0609895
CKMT2	0.00806865	1289.77	-153.957	0.272078	0.0127533	0.483336
CKMT2_AS1	0.0106774	-528.341	398.262	0.253151	0.051075	-0.365846
CMAS	0.000881247	4075.84	1100.03	0.406544	7.88869e-06	0.776727
CMPK1	0.0281192	3829.32	3518.48	0.183218	0.0200962	0.450787
CMPK2	0.132015	196.006	305.931	0.0572541	0.0703126	0.331513
CNDP1	0.00371462	257.789	10.3689	0.32157	0.000444383	0.651211
CNDP2	0.206536	9786.89	21704.4	0.0198844	0.1225	0.254376
COASY	0.00313909	3202.01	2538.45	0.333371	0.000393724	0.655893
COLGALT1	0.0235527	8725.43	5086.85	0.196835	0.00779605	0.514771
COLGALT2	0.229194	117.232	155.387	0.0124222	0.150434	0.216922
COMT	0.117128	1669.68	3234.33	0.0691524	0.149749	0.218036
COMTD1	0.145225	-541.762	1140.32	0.0467698	0.209912	-0.135994
COQ2	0.385457	-17.6533	421.456	8.90387e-05	0.262607	0.0160518
COQ3	4.56067e-05	-302.784	221.912	0.562168	1.07916e-05	-0.770039
COQ5	0.0464911	687.891	800.613	0.144868	0.0278292	0.421805
COQ6	0.0668267	85.833	105.333	0.116418	0.0353079	0.400625
COQ7	4.29743e-05	2289.75	471.91	0.565952	1.92546e-06	0.812843
COX10	0.00748206	-968.373	692.82	0.276974	0.000173845	-0.686213
COX10_AS1	0.00296058	-227.415	222.046	0.337903	0.00190356	-0.58901
COX11	7.65437e-05	-1772.05	2032.55	0.536334	3.184e-05	-0.739719
COX14	0.146838	430.814	683.196	0.045967	0.144491	0.223387
COX15	0.529007	4.03828	1558.13	6.4727e-06	0.262607	0.0296512
COX16	0.0337049	-323.361	366.896	0.171075	0.0167132	-0.464609
COX17	0.0026058	2509.09	648.892	0.344845	8.66022e-05	0.710067
COX17P1	0.0572606	11.9501	4.9796	0.127302	0.0349941	0.401294
COX18	0.10109	-166.761	667.176	0.0821701	0.0330637	-0.407759
COX19	0.206536	-200.607	817.083	0.0209026	0.174863	-0.188831
COX20	0.133152	57.4691	61.8892	0.0564421	0.221116	0.120165
COX20P1	0.0017825	373.299	-25.9806	0.366392	0.000372254	0.658122
COX4I1	0.0726834	8129	12239	0.108584	0.0341768	0.404192
COX4I2	0.00199165	-1482.46	706.235	0.360593	0.0755838	-0.321927
COX5A	0.198153	-1610.28	3973.03	0.0237844	0.250643	-0.0820423
COX5B	0.140448	-5936.93	10297.7	0.0509528	0.154944	-0.212686
COX5BP2	0.202961	-1.51581	1.39491	0.0226783	0.180386	-0.177278
COX5BP3	0.273073	-0.932201	2.06662	0.00329495	0.197933	0.160444
COX5BP6	0.288507	-1.93699	12.4449	0.00212885	0.219706	-0.124401
COX6A1	0.0708949	1880.94	1469.11	0.110647	0.111854	0.268867
COX6A1P2	0.0397251	47.3969	37.8625	0.158351	0.0495694	0.368967
COX6A2	0.227461	23.1236	29.847	0.0127619	0.222508	0.115261
COX6B1	0.0541157	-7054.45	8320.36	0.132184	0.0165097	-0.465724
COX6B1P3	0.316897	0.342336	1.15102	0.000954381	0.202236	-0.153891
COX6B1P5	0.123658	6.86161	2.76594	0.0638412	0.111854	0.268867
COX6B2	0.184606	-6.88201	7.52424	0.0275095	0.219706	-0.124651
COX6C	0.00874128	9390.94	2686.57	0.267077	0.000764407	0.630477
COX6CP1	0.0508808	20.7133	7.77514	0.13762	0.0272218	0.423811
COX6CP10	0.340799	0.373926	2.26008	0.000358992	0.250643	0.0764357
COX6CP17	0.134505	3.65758	0.955839	0.0559744	0.168421	0.197197
COX6CP2	0.00113319	20.9286	-0.858622	0.391916	0.000430814	0.652389
COX7A1	0.000581056	-2513.42	1302.57	0.430288	3.13348e-05	-0.740164
COX7A2	0.0419153	-2733.28	3671.47	0.153355	0.0215931	-0.443653
COX7A2L	0.184606	-1031.38	3660.95	0.0277368	0.250643	-0.0771376
COX7A2P1	0.0995632	18.7393	2.18244	0.0833714	0.0789887	0.317041
COX7B	0.113006	-1603.99	3746.66	0.071986	0.108806	-0.272434
COX7BP1	0.0562746	6.70434	0.861636	0.128645	0.0382686	0.393732
COX7BP2	0.0777266	5.51853	0.689804	0.103642	0.174863	0.186549
COX7C	4.7454e-05	-17114.7	11856.5	0.559555	5.61116e-05	-0.723444
COX7CP1	0.00277051	-28.3401	17.9321	0.341323	0.000747421	-0.631369
COX8A	0.171174	-909.491	1811.56	0.0331402	0.250643	-0.0782523
COX8C	0.174573	2.36127	0.784445	0.0315496	0.22569	0.111102
CP	0.0271904	79284.7	-2302.53	0.185678	0.00825254	0.510981
CPA2	0.0126603	9.11669	-0.0603387	0.242078	0.0169474	0.463492
CPA3	0.000384636	-1134.47	578.315	0.455666	6.742e-05	-0.718316
CPA4	0.0230787	940.024	-69.9765	0.198289	0.00189625	0.589233
CPA5	0.0175962	51.5522	-1.56514	0.220101	0.0117615	0.489133
CPA6	0.00331186	-108.503	51.929	0.329706	0.00503459	-0.53974
CPAMD8	0.316897	-24.8098	292.963	0.000629375	0.262607	-0.0354476
CPB1	0.22458	-2.202	3.20438	0.0137888	0.262607	-0.0542749
CPB2	0.131251	-6.18362	5.87375	0.0581429	0.174106	-0.189699
CPB2_AS1	0.000135622	-51.6735	27.125	0.50816	0.000197574	-0.681754
CPD	0.0564714	-8251.51	7392.06	0.128313	0.102005	-0.280906
CPE	0.0226632	92997.2	-1807.71	0.200312	0.0019223	0.588564
CPEB1	0.00392463	69.0119	1.92919	0.318012	0.00475021	0.542922
CPEB2	0.000117092	7519.31	875.152	0.515941	0.000141365	0.692678
CPEB2_AS1	0.00803168	78.2133	3.6106	0.272797	0.0094222	0.502732
CPEB3	0.229194	79.8915	275.986	0.0124201	0.262607	0.0345559
CPEB3_ribozyme	0.273073	1.33447	1.36559	0.00455695	0.207398	0.140492
CPEB4	0.0621797	3237.11	1307.7	0.121618	0.113276	0.267306
CPED1	0.255006	-92.7933	330.448	0.00839661	0.27276	0.00936353
CPHL1P	0.0129421	325.154	-17.3241	0.240366	0.000900284	0.622452
CPLX1	0.0107044	-562.135	448.117	0.252661	0.00822857	-0.511204
CPLX2	0.0148915	-13.7499	6.9587	0.231631	0.180625	-0.176489
CPM	0.00045539	-7153.78	5072.44	0.444308	0.000287753	-0.668377
CPN1	0.0151018	131.659	-18.7196	0.230667	2.04375e-06	0.811263
CPN2	0.168103	19.2044	4.29729	0.034679	0.00684918	0.522137
CPNE1	0.0171374	2554.79	3410.88	0.221713	0.0168362	0.46394
CPNE2	4.56067e-05	-3483.09	2754.36	0.561643	6.17318e-06	-0.782523
CPNE3	0.0496824	2845.09	2419.33	0.139881	0.11869	0.260172
CPNE4	0.047518	28.3662	1.8923	0.143518	0.0214001	0.444817
CPNE5	0.103946	-433.799	402.009	0.0797507	0.0946009	-0.292276
CPNE7	0.0953486	5624.51	553.698	0.0870548	0.0621279	0.345113
CPNE8	0.0396525	-633.971	1480.7	0.158608	0.0308645	-0.413333
CPNE9	0.0086845	31.5309	1.48404	0.267485	0.00231196	0.579488
CPO	0.098473	36.658	9.1356	0.0841133	0.107898	0.273549
CPOX	0.00990085	2535.45	361.105	0.259105	4.91711e-06	0.787874
CPPED1	0.0541741	834.774	991.343	0.131756	0.0254422	0.429385
CPQ	0.00877207	5451.49	1180.4	0.266723	0.00138428	0.603724
CPS1	0.126807	333.009	103.258	0.0617722	0.253018	0.0648759
CPSF1	6.29799e-06	12416.3	1804.91	0.645747	5.16042e-06	0.786759
CPSF1P1	0.136409	-85.7918	82.6391	0.0547391	0.113522	-0.266192
CPSF2	0.216646	231.299	1021.29	0.016216	0.250643	0.0807047
CPSF3	0.255006	-210.434	1351.28	0.00874312	0.266321	0.0111471
CPSF3L	0.0189493	2970.83	3156.22	0.214751	0.0410764	0.387472
CPSF4	0.0997269	-1619.47	1669.15	0.0831212	0.0232033	-0.437633
CPSF4L	0.138863	-3.12734	3.06903	0.0526058	0.12257	-0.253732
CPSF6	0.000186307	-2650.32	2958.47	0.49178	3.39154e-05	-0.738158
CPSF7	0.000817189	-3054.11	3856.44	0.411129	0.000187281	-0.683537
CPT1A	0.0487565	5089.5	3723.88	0.141495	0.0410764	0.387472
CPT1B	0.0527371	68.6736	21.7444	0.13459	0.0461815	0.376547
CPT1C	0.316897	-11.297	166.654	0.000857641	0.249816	-0.0860553
CPT2	0.292982	-68.874	520.482	0.00189943	0.250643	0.0697806
CPVL	0.141125	2652.69	1507.1	0.0501329	0.256717	0.0628694
CPXM1	0.0252967	-867.082	528.716	0.19144	0.0142989	-0.475087
CPXM2	0.175644	-532.369	586.719	0.0304134	0.181054	-0.176123
CPZ	0.174573	-10.5723	8.2669	0.031453	0.108775	-0.272589
CRLS1	0.218602	-801.223	2442.88	0.0151537	0.134206	-0.240999
CRYL1	0.186675	3059.18	3791.09	0.0266368	0.250643	0.0758
CS	0.170747	-898.327	3921.05	0.0333184	0.167407	-0.201093
CSAD	0.00209689	2874.24	420.518	0.357688	0.00378185	0.554232
CSAG1	0.288507	-0.480522	1.33085	0.00212106	0.22569	-0.107673
CSDC2	0.216646	-31.8928	32.2972	0.0160777	0.166433	-0.202208
CSDE1	0.126807	7243.78	12982.2	0.0616628	0.143992	0.22517
CSE1L	0.136409	-1221.75	2645.29	0.0547287	0.138906	-0.232305
CSF1	0.0188436	9782.8	853.816	0.215587	0.00789222	0.513433
CSF1R	0.0184162	20280.5	1231.64	0.217142	0.00192969	0.588342
CSF2	0.529007	-0.2297	8.91733	5.08521e-06	0.205978	0.148066
CSF2RA	0.00410336	2988.48	268.928	0.315271	4.83153e-06	0.78832
CSF2RB	0.141125	1094.69	563.069	0.0503644	0.0561041	0.356037
CSF3	0.121297	-2.9752	2.57444	0.0661897	0.130439	-0.246104
CSF3R	0.135577	3963.52	1381.91	0.0554568	0.0192578	0.453908
CSGALNACT1	0.0213944	-823.965	908.609	0.205113	0.0280487	-0.421136
CSGALNACT2	0.0465695	1633.38	1018.07	0.144702	0.00635932	0.526364
CSK	0.273073	594.431	3291.37	0.00396754	0.262607	0.0535059
CSMD1	0.0215759	59.5705	5.57579	0.204085	0.0198636	0.451902
CSMD2	0.295314	-17.1946	80.7596	0.00162557	0.220271	-0.121949
CSMD3	0.142726	-239.455	140.628	0.0489444	0.120605	-0.256485
CSNK1A1	0.0541741	-1639.49	2563.74	0.131621	0.067456	-0.336864
CSNK1A1L	0.16565	-1.88392	1.9827	0.0363627	0.140805	-0.22982
CSNK1A1P1	0.0707186	-7.92579	6.56984	0.110846	0.110932	-0.270205
CSNK1D	1.94774e-05	7413.9	3588.25	0.599187	2.76352e-06	0.803703
CSNK1E	0.273073	962.7	6016.93	0.00469006	0.250643	-0.0771376
CSNK1G1	0.227461	145.576	688.586	0.013103	0.179553	0.179468
CSNK1G2	0.000160981	6302.32	2697.58	0.499568	7.1728e-05	0.716087
CSNK1G2_AS1	0.00689322	59.591	-1.94468	0.282863	0.012675	0.484005
CSNK1G3	0.0309644	-962.855	1190.69	0.176829	0.172772	-0.193067
CSNK2A1	0.340799	-180.966	3043.09	0.000412543	0.222508	-0.114815
CSNK2A2	0.0115373	-2654.94	2990.61	0.247997	0.0308645	-0.413333
CSNK2A3	0.248684	-2.89551	8.63499	0.00973959	0.205856	-0.148479
CSNK2B	0.00693755	-1041.13	828.827	0.282464	0.000197574	-0.681754
CSPG4	0.000512827	-20540.4	9381.34	0.437692	0.0401525	-0.389478
CSPG4P11	0.229194	12.5763	25.3598	0.0123263	0.262607	0.0176123
CSPG4P12	0.0340586	-37.1622	25.1253	0.170295	0.16179	-0.205998
CSPG4P13	0.0545781	-125.807	75.6674	0.131127	0.132186	-0.243898
CSPG4P8	0.0140456	33.1889	0.486913	0.235691	0.00607862	0.52932
CSPG5	0.529007	-0.245853	10.3823	1.93264e-05	0.262607	0.0499388
CSPP1	0.00297522	4518.88	682.807	0.337469	0.000501673	0.646306
CSRNP1	0.221373	-1021.68	2000.64	0.0147344	0.27276	-0.00958647
CSRNP2	0.10109	-413.111	960.292	0.0822374	0.130439	-0.245904
CSRNP3	0.221928	-51.5848	129.393	0.014425	0.262607	0.0118159
CSRP1	0.000632266	-8041.84	6791.6	0.424513	1.50966e-05	-0.761121
CSRP2	0.169171	-884.831	1166.45	0.0343292	0.22569	-0.109687
CSRP2BP	0.00575859	-857.76	749.903	0.294042	0.00980928	-0.500503
CSRP3	0.212296	-18.439	12.7238	0.0177426	0.0319631	-0.410672
CST2	0.0259684	-35.1897	16.6326	0.189103	0.00980928	-0.500418
CST3	0.144631	-16151.6	27105.9	0.0472533	0.152793	-0.214469
CST6	0.120256	46.1091	8.01363	0.0668241	0.126465	0.250363
CST7	0.294909	-90.3883	525.61	0.00167002	0.21073	-0.134433
CSTA	0.00339212	1436.31	18.4965	0.328107	0.000328007	0.662804
CSTB	0.0103372	20404.7	3225.69	0.255726	0.000811857	0.627802
CSTF1	0.141125	188.434	747.017	0.0502419	0.11869	0.260395
CSTF2	0.251158	-85.1909	395.909	0.009367	0.262607	-0.0546206
CSTF2T	3.45528e-05	-950.388	1265.18	0.575242	7.97536e-05	-0.71252
CSTF3	0.0195129	424.39	720.405	0.21241	0.0488925	0.371197
CSTF3_AS1	0.0936598	5.2788	0.67771	0.0881802	0.207398	0.143224
CTH	0.00210687	325.392	61.6733	0.357259	0.00058482	0.640733
CTHRC1	0.22458	-543.994	1407.62	0.0137069	0.185852	-0.172111
CTPS1	0.0584024	-1593.47	1283.28	0.126234	0.0118042	-0.488687
CTPS2	0.000186307	-759.451	872.178	0.491389	7.84787e-05	-0.713189
CYB5R1	0.385457	33.8929	2177.95	0.000101963	0.250643	0.0778064
CYB5R2	0.273073	-77.9088	220.132	0.00370188	0.206412	0.145803
CYB5R3	0.0175962	64544.4	7991.39	0.220127	0.000381299	0.657007
CYB5R4	0.161986	-637.815	1081.44	0.0389102	0.13825	-0.233865
CYB5RL	0.0215759	174.352	93.2513	0.204002	0.0266663	0.425817
CYC1	0.0228606	7392.21	4826.79	0.199362	0.00603763	0.529708
CYCS	0.0245553	-6585.53	6204.82	0.193456	0.00684918	-0.522128
CYCSP10	0.132015	8.68821	3.43018	0.0573509	0.198396	0.159421
CYCSP2	0.316897	0.257936	0.919282	0.000959715	0.22569	0.106786
CYCSP24	0.0297437	11.8601	0.441302	0.180186	0.034755	0.40223
CYCSP28	0.385457	-0.370389	7.81116	0.000108802	0.262607	0.0412441
CYCSP34	0.0721169	-29.8228	28.2744	0.109272	0.105816	-0.276001
CYCSP38	0.143457	3.82256	0.884419	0.0483041	0.150434	0.217144
CYCSP40	0.211494	7.9572	6.5988	0.0182072	0.207398	0.14273
CYCSP45	0.221373	-1.45771	1.46645	0.0146441	0.140601	-0.230414
CYCSP52	0.051064	10.6186	-0.677148	0.136852	0.0348408	0.401974
CYCSP55	0.0508808	-4.81617	3.40377	0.13766	0.0475334	-0.373434
CYP11A1	0.000581056	287.795	-38.1626	0.430125	2.04375e-06	0.811517
CYP17A1	0.011393	-147.602	95.671	0.248795	0.0263421	-0.426932
CYP17A1_AS1	0.0506483	-6.06144	3.09013	0.138294	0.0723322	-0.328136
CYP19A1	0.205575	-27.246	28.4099	0.0215349	0.206412	-0.146377
CYP1A2	0.311024	-0.345381	1.10499	0.00131817	0.262607	-0.0278784
CYP1B1	0.0773419	-2349.91	1744.8	0.104186	0.0275394	-0.422919
CYP1B1_AS1	0.126524	141.751	9.0978	0.0622181	0.172051	0.193736
CYP21A2.2	0.25559	-42.2787	75.9025	0.00710685	0.152409	0.215138
CYP24A1	0.000117092	34152	-5077.21	0.515523	3.67611e-05	0.735483
CYP26A1	0.0508808	8.95908	1.83154	0.137548	0.0377416	0.394934
CYP26B1	0.000186307	-1221.01	580.412	0.491105	2.51319e-05	-0.746184
CYP26C1	0.0502182	-9.63259	5.35366	0.138964	0.0199628	-0.451345
CYP27A1	0.0403723	-3305.44	2892.1	0.156717	0.0906163	-0.298741
CYP27B1	0.206536	-381.428	327.753	0.0202565	0.231592	-0.100546
CYP27C1	0.123286	-76.0828	45.0508	0.0641586	0.0261044	-0.42776
CYP2A6	0.296202	2.28063	9.695	0.0015829	0.235533	0.094527
CYP2A7	0.0701666	3.83369	0.73759	0.111691	0.0334413	0.406558
CYP2B6	0.0997269	-8.1872	5.95134	0.0831579	0.105816	-0.275963
CYP2C18	1.71281e-05	1373	-198.47	0.60638	4.29309e-05	0.731315
CYP2C19	3.45528e-05	625.782	-94.8224	0.574943	1.35524e-05	0.764325
CYP2C8	1.06899e-05	1533.43	-74.7237	0.626463	6.38711e-07	0.837813
CYP2C9	3.82318e-06	4039.09	-581.493	0.676176	7.69184e-05	0.713857
CYP2D6	0.273073	14.6345	59.1555	0.00344746	0.262607	0.0278676
CYP2D7P	0.00400692	255.383	56.6883	0.316562	0.0213075	0.445436
CYP2E1	6.04067e-05	757.838	-49.5661	0.54655	0.000108301	0.702264
CYP2F1	0.0427555	5.86494	0.578986	0.151615	0.0269618	0.424677
CYP2J2	0.0309291	2389.74	-69.6153	0.17728	0.126465	0.250363
CYP2R1	0.146838	-161.891	510.741	0.0458773	0.143992	-0.224725
CYP2S1	0.248684	-265.024	405.674	0.00980474	0.179511	0.180805
CYP2U1	0.216565	-69.3992	348.72	0.0164059	0.250643	-0.0813735
CYP2W1	0.0227647	-31.2731	21.9416	0.199744	0.0120154	-0.487349
CYP39A1	0.000109658	-121.9	65.8711	0.51995	2.06371e-05	-0.751534
CYP3A4	0.159499	-9.01445	9.87576	0.0399579	0.220271	-0.121557
CYP3A43	0.0377899	-19.156	11.5646	0.162629	0.0965698	-0.290046
CYP3A5	0.0860444	3933.28	1468.92	0.0954448	0.0952535	0.291607
CYP3A7	0.0825235	-102.238	65.9396	0.0989413	0.22569	-0.103891
CYP46A1	0.141125	-138.641	170.029	0.0502385	0.209912	-0.137778
CYP4F2	0.000976152	864.46	-137.692	0.400872	4.62931e-06	0.78934
CYP4F22	0.184606	-5.63167	8.10071	0.027676	0.179553	-0.180359
CYP4F23P	0.331339	-0.749749	3.56358	0.000481261	0.181054	0.175812
CYP4F24P	0.0106774	-13.0473	6.49005	0.253298	0.00120601	-0.610009
CYP4F25P	0.000593327	-51.0306	20.69	0.428313	0.00760484	-0.516274
CYP4F29P	0.01465	61.8374	-5.49658	0.232798	0.014869	0.472399
CYP4F3	1.84108e-05	29485.6	-4274.64	0.601193	1.38322e-06	0.821538
CYP4F32P	0.00353931	260.344	-38.6285	0.324718	0.0014135	0.602585
CYP4F35P	0.000264263	-184.276	107.459	0.4754	0.000425639	-0.652994
CYP51A1	0.0125433	-91.5481	55.152	0.242715	0.00514935	-0.53818
CYP51A1P2	0.219293	10.0717	12.9586	0.0150267	0.220271	0.123063
CYP51A1P3	0.0090443	102.184	6.35918	0.264783	0.0144328	0.474419
CYP7A1	0.140121	-3.48567	3.41956	0.0514304	0.10075	-0.28332
CYP7B1	0.136684	365.895	224.678	0.0541497	0.11869	0.259949
CYP8B1	0.000186307	5966.12	-742.456	0.491776	0.000446482	0.650988
DAD1	0.10987	-1863.06	3425.31	0.0747275	0.0495694	-0.36919
DAO	6.89299e-05	1095.63	-138.263	0.540981	0.000122928	0.69766
DBH	0.186675	29.459	33.5148	0.0267882	0.202236	0.154944
DBH_AS1	0.259153	45.9165	150.144	0.00667369	0.286075	0.0049047
DBT	0.371485	34.9483	1165.84	0.000183682	0.262607	0.0521682
DCK	0.248684	-142.759	812.082	0.00961062	0.22569	-0.104113
DCT	0.00301062	-160.076	85.4213	0.33662	0.175216	-0.18571
DCTD	0.0205783	-2922.5	3754.09	0.207958	0.00442438	-0.546874
DCTN1	0.0479305	-2244.51	3851.66	0.142681	0.0179647	-0.459036
DCTN1_AS1	0.131251	5.61614	1.71121	0.0581858	0.11869	0.260239
DCTN2	0.206536	824.071	3692.56	0.0205355	0.262607	-0.0477094
DCTN3	0.000953718	-1877.55	2010.13	0.40211	0.00303454	-0.565824
DCTN4	0.0073303	-2485.39	2968.17	0.278047	0.0186402	-0.45636
DCTN5	0.00990085	1624.08	1255.68	0.259015	0.000377656	0.657453
DCTN6	0.0546425	-502.147	830.257	0.130753	0.00218695	-0.582099
DCTPP1	0.0496824	1234.35	726.234	0.140222	0.024722	0.43206
DCXR	0.0782067	1251.52	1074.67	0.102675	0.0880025	0.302308
DDC	0.0215759	7929.95	322.654	0.204184	0.012765	0.483113
DDC8	0.142186	50.137	6.72312	0.049494	0.0180078	0.458813
DDO	0.0127874	-221.256	299.529	0.241317	0.0191991	-0.454354
DDOST	0.0397554	13876.5	6730.71	0.157918	0.047449	0.373872
DEGS1	0.00714922	11404.6	3525.19	0.279899	0.00126194	0.608183
DEGS2	0.0528191	128.4	15.5417	0.13436	0.00295395	0.567385
DERA	0.00235516	5144.43	932.38	0.349973	1.35524e-05	0.764242
DGAT1	0.00209473	3032.22	954.432	0.357844	0.000235477	0.675511
DGAT2	0.340799	29.1948	230.076	0.000409789	0.137256	0.234757
DGAT2L6	0.190197	2.57093	0.756327	0.0258391	0.231592	0.0995904
DGAT2L7P	0.00495523	93.3287	-7.84877	0.303591	0.0248725	0.431168
DGKA	0.108408	972.315	547.43	0.0758765	0.0713623	0.329953
DGKB	0.00614233	-94.89	48.4312	0.289947	0.0132614	-0.480429
DGKD	0.00636936	-3683.14	2805.43	0.287603	0.0431927	-0.383013
DGKE	0.0107376	-608.691	531.857	0.252419	0.0434931	-0.382344
DGKG	0.193034	144.8	239.936	0.0251727	0.145497	0.221603
DGKH	0.000875453	-3847.09	2126.46	0.407394	0.0263983	-0.426709
DGKI	3.82318e-06	6418.15	-761.824	0.676967	8.67309e-05	0.709844
DGKK	0.00234973	-18.9762	9.12933	0.350292	0.0014998	-0.599669
DGKQ	0.0446273	900.36	697.424	0.147908	0.0408626	0.387917
DGKZ	0.000576795	12170.9	2721.27	0.430871	1.07916e-05	0.769816
DGKZP1	0.00133839	96.3911	12.6911	0.382631	0.000372254	0.658122
DGUOK	0.316897	49.584	1082.67	0.00104326	0.250643	0.07201
DGUOK_AS1	0.0233775	44.7249	11.5009	0.197383	0.0401525	0.389478
DHCR24	0.000442081	29189.5	968.189	0.44643	0.00128803	0.607069
DHCR7	0.16337	396.162	700.904	0.0377615	0.0980192	0.287817
DHDDS	4.56067e-05	2154.76	792.026	0.562191	3.429e-05	0.737712
DHDH	0.00564523	551.826	-28.321	0.295168	0.000764407	0.630477
DHFR	0.000402123	-1947.98	1159.74	0.452555	0.000890815	-0.62312
DHFRL1	0.0700856	384.938	335.445	0.112132	0.0374724	0.395497
DHFRP1	4.29743e-05	-37.9542	20.714	0.565758	7.56154e-06	-0.777841
DHFRP2	0.157383	-3.82705	2.99956	0.0409106	0.198396	-0.1592
DHODH	0.00410602	2418.3	373.452	0.315142	0.000216371	0.678633
DHRS11	0.112917	-553.027	515.677	0.072335	0.0924037	-0.296512
DHRS3	0.000490604	17190.1	1775.7	0.441009	3.55899e-05	0.736597
DHRS4	0.0154248	-566.681	472.103	0.229171	2.04375e-06	-0.811728
DHRS4_AS1.1	0.0400946	-300.792	276.432	0.157232	0.00192969	-0.588342
DHRS4L2	0.0106784	-638.312	669.433	0.252871	0.000101415	-0.704271
DHRS9	0.255006	38.3847	44.5491	0.0079423	0.250643	0.0749082
DHTKD1	0.321847	-350.292	3475.46	0.000566346	0.262607	0.0390147
DLAT	0.00319803	-1755.05	1712.11	0.331906	0.00298102	-0.566939
DLD	0.0235684	-5127.15	4359.6	0.196633	0.000889081	-0.623343
DLST	0.119678	-743.556	2127.69	0.0672698	0.0474568	-0.373649
DMGDH	0.132015	1757.87	863.943	0.057609	0.193361	0.164753
DNMT1	0.273073	-584.072	2535.93	0.00402738	0.262277	-0.0559582
DNMT3A	0.273073	72.0183	782.644	0.00417548	0.262277	0.05685
DNMT3B	0.00168686	967.135	69.3277	0.370235	2.92254e-05	0.742171
DOLK	1.94774e-05	-751.991	627.255	0.599034	1.22028e-05	-0.766694
DOLPP1	0.202961	-83.0833	390.491	0.0220102	0.262607	-0.0316576
DOT1L	0.198153	-323.798	1474.64	0.0237226	0.199205	-0.157396
DPAGT1	0.315252	72.7614	1200.61	0.00119528	0.250643	0.0758
DPM1	0.10393	510.668	1148.62	0.079887	0.0205331	0.448557
DPM2	0.273073	170.167	1426.83	0.00432047	0.262607	0.0251923
DPM3	0.371485	-37.1491	1115.64	0.000154639	0.262607	0.0468176
DPYD	0.110606	1522.97	1104.67	0.0740736	0.051658	0.364955
DPYD_AS1	0.104239	5.65036	0.54317	0.0793898	0.0680808	0.335272
DPYD_AS2	0.208178	-2.19913	2.83667	0.0194848	0.191845	-0.168482
DPYD_IT1	0.00824047	11.1306	-0.409639	0.270663	0.000991035	0.618346
DPYS	0.000114301	13272.8	391.756	0.516973	1.50198e-05	0.761344
DPYSL2	0.103946	-2913.99	4741.27	0.0796602	0.134206	-0.241222
DPYSL3	0.00722166	-13557.1	7766.02	0.279136	0.00050401	-0.646083
DPYSL4	0.0689086	-45.9932	39.2172	0.113581	0.0619672	-0.346673
DPYSL5	0.0213944	40.1848	-3.37504	0.205023	0.0024518	0.576498
DSE	0.151105	1826.57	1273.55	0.0433006	0.10255	0.279568
DSEL	0.00156724	-3130.14	1425.34	0.373708	0.101221	-0.282689
DTYMK	0.0779037	985.024	964.312	0.103409	0.0645455	0.340877
DUT	0.108408	-719.721	2199.02	0.0757762	0.018596	-0.456583
DUTP1	0.000995561	12.7061	-0.607341	0.399817	0.000467518	0.649397
DUTP2	0.10446	5.8535	1.48691	0.0792216	0.102005	0.280884
DUTP6	0.183786	-8.2851	19.139	0.0280684	0.16179	-0.206221
DUTP7	0.0536761	7.74009	1.11193	0.132792	0.0495694	0.369121
EARS2	0.000717308	2525.07	602.282	0.41818	3.52006e-05	0.737043
EBP	0.120189	-526.32	1147.71	0.0669185	0.13617	-0.238993
EBPL	0.00137102	-2217.31	1544.24	0.380738	0.000321671	-0.663696
ECHDC1	0.000340689	-5338.48	3147.59	0.462164	0.000556718	-0.642516
ECHS1	0.198153	1516.63	4544.23	0.0235265	0.22569	0.108349
ECI1	0.0541741	4422.96	3217.97	0.131833	0.0336674	0.405753
ECI2	0.2811	-70.0292	915.218	0.00229126	0.262607	0.0445882
EHHADH	0.206536	1804.23	1929.35	0.021067	0.179553	0.179913
EHMT1	0.0450393	-844.896	1770.6	0.147216	0.0238124	-0.435181
EHMT2	0.0253286	-3705.07	3238.67	0.191125	0.000158874	-0.689111
EHMT2_AS1	0.0199021	9.1017	-0.474515	0.210466	0.0304184	0.415112
ELOVL1	0.0349821	2987.92	2097.33	0.168354	0.0222583	0.440977
ELOVL2	0.00079288	-411.49	189.076	0.413254	3.39154e-05	-0.738158
ELOVL2_AS1	0.0541741	-7.58173	3.75983	0.131892	0.0602253	-0.349684
ELOVL3	0.296202	1.23286	4.38385	0.00155833	0.205625	0.150931
ELOVL4	0.00339212	-75.1261	43.0481	0.328098	0.0120154	-0.487349
ELOVL5	0.0610504	-2512.42	3506.81	0.122844	0.0336461	-0.405976
ELOVL6	0.273073	-80.7971	605.464	0.0028795	0.262607	-0.037677
ELOVL7	0.00176979	-3233.34	2250.74	0.367266	0.00320248	-0.562926
ENGASE	0.206536	844.779	2203.44	0.020118	0.197778	0.161855
ENO1	0.000318906	197809	27691.2	0.46661	1.63742e-05	0.758446
ENO1_AS1	0.922991	0.00961588	3.95138	2.16978e-07	0.250643	0.0751395
ENO1_IT1	7.86156e-06	260.826	-25.8107	0.638804	2.49936e-05	0.746407
ENO1P3	0.206536	1.8274	1.02904	0.0197731	0.158191	0.209413
ENO2	0.000364878	48047.9	-2262.45	0.45829	8.86114e-05	0.708953
ENO3	0.292982	44.6607	325.928	0.00196497	0.297918	0.00379
ENO4	0.273073	-7.56455	66.1093	0.00319816	0.262607	-0.02274
ENOPH1	0.0202117	-1687.13	2167.22	0.209257	0.0139028	-0.477094
ENOSF1	0.122825	-3558.18	4650.14	0.0646807	0.0980192	-0.287817
ENPP1	0.110319	-1347.3	906.556	0.0743319	0.049533	-0.369413
ENPP2	0.273073	-6342.25	13669.9	0.00477039	0.262607	0.0483782
ENPP3	0.000508788	-18042.3	10479.3	0.438725	0.00216607	-0.582545
ENPP4	4.7454e-05	-2529.85	1809.85	0.559396	6.77824e-05	-0.718093
ENPP6	0.0649003	28.1378	9.88472	0.118555	0.0727891	0.327055
ENPP7	0.00452224	1927.78	-247.16	0.309801	3.81712e-05	0.734561
ENPP7P1	0.0444703	17.1952	0.740963	0.148993	0.0612499	0.348255
ENPP7P10	0.255006	4.83389	5.24428	0.0084554	0.261208	0.0591988
ENPP7P11	0.273073	1.85407	5.24917	0.00452199	0.262607	0.0470406
ENPP7P12	0.000875453	141.722	-18.48	0.407316	0.00280255	0.570124
ENPP7P4	0.00486145	115.846	3.13701	0.305265	0.0237601	0.435404
ENPP7P5	0.0213096	24.2642	-2.12586	0.205471	0.000308737	0.665372
ENPP7P6	0.0444703	7.26313	-0.297872	0.148974	0.101221	0.282573
ENPP7P8	0.0154717	-208.759	90.284	0.228932	0.176883	-0.184114
ENTPD1	0.00305568	-4346.47	3449.61	0.335479	0.0140101	-0.476425
ENTPD1_AS1	0.103731	103.04	89.6324	0.0800721	0.111854	0.268867
ENTPD2	0.183447	-462.947	592.336	0.0282628	0.206412	-0.146026
ENTPD3	0.00554777	29.7587	0.336903	0.296282	0.0021088	0.583883
ENTPD3_AS1	0.011043	97.2163	63.5968	0.250505	0.00674338	0.52302
ENTPD4	0.273073	255.358	1528.02	0.00364872	0.141195	0.228738
ENTPD5	0.000773407	2866.57	271.28	0.414513	0.000109121	0.701819
ENTPD6	0.168331	1749.79	2658.64	0.0345448	0.297918	0.00245235
ENTPD8	0.213666	-58.3067	64.3235	0.0170213	0.262607	-0.0289823
EOGT	7.48239e-05	-1275.54	1032.49	0.53732	2.52712e-05	-0.745961
EPHX1	0.0349336	-3210.87	3916.25	0.168507	0.0165097	-0.465724
EPHX2	0.316897	-253.701	1286.5	0.000811097	0.22569	0.109018
ETHE1	0.0849346	-904.165	943.505	0.0968125	0.0153723	-0.470183
ETNK1	1.26721e-05	9598.35	794.868	0.618592	0.000122651	0.697806
ETNK2	0.107016	1561.32	420.07	0.0774909	0.262607	0.0552894
ETNPPL	0.0197501	-32.3747	17.8092	0.211116	0.0305728	-0.414409
EXT1	0.128744	968.307	1480.81	0.0600097	0.21003	0.134879
EXT2	0.126524	-1053.75	3101.06	0.0620872	0.0780999	-0.318137
EXTL1	0.00371462	86.9036	4.68865	0.321632	0.00864909	0.507637
EXTL2	0.0570365	-333.805	446.282	0.127656	0.10953	-0.271765
EXTL3	5.42825e-05	-1622.13	1554.97	0.552607	1.47937e-05	-0.762013
EXTL3_AS1	0.0155184	37.0226	7.64484	0.228502	0.0276551	0.422473
EZH1	0.00472062	2790.55	1039.71	0.306924	0.00487569	0.541301
EZH2	0.0323989	-821.156	802.515	0.173753	0.0179514	-0.459259
FADS1	0.0248274	3418.08	823.233	0.192572	0.00372889	0.5549
FADS2	0.144028	2032.96	1286.43	0.0478804	0.197933	0.160741
FAH	0.00822499	5517.25	2457.49	0.270847	0.0245362	0.432952
FAHD1	0.041392	5419.26	2021.12	0.155121	0.032471	0.409097
FAHD2A	0.148811	-382.776	921.139	0.0447304	0.11869	-0.258835
FAHD2B	0.0878912	-412.934	363.993	0.0936154	0.221298	-0.119496
FAHD2CP	0.212296	-40.5046	109.83	0.0179606	0.22569	-0.108126
FASN	0.371485	166.953	2765.23	0.00022596	0.140601	0.230298
FBP1	0.196552	-1469.81	1410.99	0.0242018	0.231592	-0.098317
FBP2	0.000765405	24.3292	-2.52618	0.415061	0.00103434	0.616496
FDFT1	0.0597089	-1342.25	1701.45	0.124544	0.0319631	-0.410657
FDPS	0.00491725	1078.48	776.129	0.304341	0.0131017	0.48133
FDPSP1	0.316897	-0.210227	0.751848	0.000853119	0.297918	-0.00381244
FDPSP2	0.255006	1.82183	2.70785	0.00838482	0.179429	0.181717
FDPSP3	0.210845	2.39555	1.18284	0.0184037	0.27276	-0.00630151
FDPSP4	0.126524	-3.40283	2.2565	0.0622442	0.141577	-0.227793
FDPSP5	0.0190512	-3.7214	1.84858	0.214135	0.0112851	-0.491566
FECH	0.000318906	-1368.49	1070.98	0.466811	0.000316996	-0.664364
FGGY	0.0107641	2282.95	448.637	0.252209	0.0221086	0.441646
FH	0.132015	-753.491	2015.09	0.0574265	0.101577	-0.281798
FHAD1	0.0450393	538.603	116.664	0.14728	0.0213213	0.445213
FHDC1	0.0813934	-317.001	256.107	0.100055	0.0120154	-0.487349
FHIT	0.112917	-169.938	303.83	0.0726698	0.112224	-0.268198
FHL1	0.0218607	29753.5	-1669.94	0.203032	0.0939063	0.293613
FHL2	0.010337	3507.18	1210.3	0.255838	0.00487377	0.541524
FHL3	0.000148282	-1563.48	1016.95	0.503906	6.43941e-05	-0.719877
FHL5	0.0206361	-672.868	378.211	0.207581	0.107898	-0.273772
FHOD1	0.000177291	-2293.06	2035.28	0.494477	8.67309e-05	-0.709844
FHOD3	0.273073	-153.942	979.429	0.00364359	0.191845	0.166983
FIG4	0.0937958	-326.915	752.887	0.0879647	0.0559152	-0.356706
FKRP	0.269737	-76.4243	647.73	0.00523375	0.259908	-0.06064
FKTN	0.00358715	-704.319	821.535	0.323625	0.00504138	-0.539517
FLAD1	0.15515	361.331	1146	0.041799	0.127321	0.249025
FMO1	0.316897	141.915	493.624	0.000958176	0.138522	0.232973
FMO2	0.529007	19.2437	833.588	1.53649e-05	0.250643	0.0700035
FMO3	0.0414739	802.379	154.049	0.154749	0.0231894	0.437856
FMO4	4.3234e-06	723.006	166.958	0.660551	1.03933e-06	0.826666
FMO5	0.210845	-81.0245	153.772	0.0184075	0.262607	0.0162747
FNTA	0.000175344	-2360.96	2109.9	0.495446	0.000328007	-0.662804
FNTAP2	0.161696	2.99058	1.81815	0.0390548	0.171993	0.194398
FNTB	0.273073	31.4299	261.314	0.00293818	0.231592	0.100546
FOLH1	0.0390545	-4111.19	2502.06	0.15993	0.216757	-0.128414
FOLH1B	0.0756656	-9.48769	5.43084	0.105554	0.11869	-0.260327
FPGS	0.255006	235.364	1650.44	0.00790855	0.179553	0.17813
FPGT	0.00597864	481.446	417.898	0.291604	0.0016606	0.595253
FPGT_TNNI3K	0.529007	0.781598	42.582	8.1127e-06	0.262607	-0.0494929
FTCD	0.0245678	4436.55	-399.452	0.193346	0.00023857	0.675066
FTCDNL1	0.000795097	160.407	32.0434	0.41288	0.000113272	0.700704
FTH1	0.0139054	55169.3	12297.7	0.236277	0.000990641	0.618439
FTH1P1	0.0152531	17.4233	0.581943	0.229906	0.0072716	0.518784
FTH1P10	0.137602	10.8665	10.1371	0.0531061	0.191459	0.168989
FTH1P11	0.0147592	28.0721	5.43701	0.232341	0.0121439	0.486457
FTH1P12	0.00528448	23.7361	3.26053	0.299312	0.000924164	0.621337
FTH1P15	0.0516375	7.05503	1.80494	0.135815	0.0559152	0.35708
FTH1P16	0.012339	99.3006	27.6199	0.243784	0.00231196	0.579424
FTH1P19	0.0118849	-9.11503	5.04159	0.245909	0.00345214	-0.559127
FTH1P2	0.0597089	57.6718	33.8125	0.124657	0.0981735	0.286925
FTH1P20	0.0120098	617.551	59.0881	0.245305	0.0107387	0.494483
FTH1P22	0.184606	22.2872	17.0676	0.0276838	0.262607	0.0472635
FTH1P23	0.00507606	50.7127	12.4528	0.302176	0.00196363	0.58745
FTH1P24	0.174573	2.23315	0.624623	0.0317887	0.22569	0.10688
FTH1P3	0.000112655	48.3257	10.8643	0.518133	4.88501e-05	0.72768
FTH1P4	0.162897	8.0913	10.9506	0.0383651	0.205515	0.151154
FTH1P5	0.0216614	18.4256	4.20191	0.203619	0.00775025	0.515217
FTH1P7	0.00583993	163.463	13.4936	0.293017	0.000430814	0.652326
FTH1P8	0.0487953	67.2759	35.817	0.141375	0.0495694	0.368745
FTL	0.0280676	292617	56124.5	0.183504	0.00219519	0.581876
FTLP12	0.00281889	-9.63453	4.77775	0.340221	0.00138959	-0.603509
FTLP14	0.0925313	60.1425	18.2282	0.0895897	0.0965698	0.289823
FTLP15	4.18628e-06	340.968	-44.8062	0.666853	0.000107392	0.702577
FTLP17	0.322719	-0.340624	1.73697	0.000520512	0.262607	-0.0457211
FTLP2	0.102234	28.2628	15.9364	0.0813605	0.0382075	0.393937
FTLP3	0.0205783	495.668	93.5965	0.207943	0.00144128	0.601495
FTLP5	0.183447	-3.38806	3.22441	0.0282514	0.198396	-0.159676
FTLP6	0.0266461	6.44677	-0.467977	0.187478	0.0688381	0.333575
FUCA1	0.174573	2018.78	2602.77	0.0308881	0.206412	0.146695
FUCA1P1	0.000442081	37.7152	1.1778	0.446534	3.03465e-05	0.741056
FUCA2	0.0390685	-2717.58	2890.51	0.159641	0.0183589	-0.457475
FUT1	0.000156821	-253.51	151.522	0.500917	8.09327e-05	-0.712074
FUT10	0.0969449	-146.369	204.333	0.0859919	0.0694764	-0.332628
FUT11	0.273073	624.135	2480.41	0.004809	0.262607	0.05306
FUT2	0.208903	-78.9075	129.214	0.0193575	0.250643	-0.0753541
FUT3	0.0564057	139.652	3.19876	0.128449	0.00516592	0.537957
FUT4	0.10364	-228.037	431.004	0.0802317	0.0996689	-0.284696
FUT6	0.0039042	5106.9	-408.668	0.318535	0.0030399	0.565602
FUT7	0.0494799	85.0173	18.1445	0.140509	0.0335801	0.406199
FUT8	0.261724	120.792	541.038	0.00600148	0.262607	0.0222941
FUT9	0.00525995	-200.998	90.5743	0.300126	0.000108301	-0.702276
FXN	0.000123441	-380.066	312.096	0.513063	1.68272e-05	-0.757554
G6PC2	0.00323886	-46.6214	20.8754	0.331022	0.13617	-0.239232
G6PC3	0.216277	696.027	2297.11	0.0165461	0.209912	0.138001
G6PD	0.139899	-3911.21	3574.19	0.0515901	0.22569	-0.105005
GAA	0.00847173	11845.8	5202.5	0.269052	0.00610541	0.529039
GAD1	0.000696025	1802.66	-193.185	0.420042	3.48372e-06	0.796569
GAD2	0.0975282	3.72461	1.05392	0.0853061	0.075727	0.321061
GADL1	0.102025	-3.32538	2.0596	0.0815761	0.0619672	-0.346973
GAL3ST1	0.00235516	20838.8	2523.37	0.349893	0.00100993	0.617547
GALC	0.108483	1445.2	1146.64	0.0755782	0.0344312	0.403523
GALE	2.85364e-06	18044.1	-939.012	0.694003	1.20947e-06	0.82399
GALK1	0.193034	836.818	1614.05	0.0251397	0.132056	0.24412
GALK2	0.0452677	601.498	403.445	0.146703	0.0581833	0.352693
GALM	0.00305568	3811.96	1189.4	0.335264	0.000704619	0.633599
GALNS	4.3234e-06	3393.37	700.672	0.660247	1.51848e-06	0.819086
GALNT1	9.04996e-05	-4228.32	3364.04	0.527703	2.36722e-05	-0.747744
GALNT10	0.273073	-349.676	2069.08	0.00357027	0.172901	0.192175
GALNT11	0.0746204	-1922.94	3379.78	0.106612	0.0738574	-0.324825
GALNT12	0.000417558	-1452.38	769.082	0.450037	2.52712e-05	-0.745961
GALNT13	0.0110371	-54.048	23.7513	0.250622	0.0965698	-0.289956
GALNT14	0.229194	2299.28	5549.52	0.0124722	0.201333	0.155836
GALNT15	0.0496824	-926.897	551.806	0.13977	0.163444	-0.20466
GALNT16	0.0205783	-325.382	160.954	0.208007	0.0929812	-0.295397
GALNT18	0.248684	801.403	2231.47	0.00971302	0.235533	0.09475
GALNT2	0.0398471	7848.6	3131.28	0.157698	0.0291509	0.418015
GALNT3	0.0112799	-141.475	114.408	0.249375	0.000280499	-0.669269
GALNT4	0.273073	5.04908	18.4118	0.00363114	0.262607	0.0325494
GALNT5	0.208903	55.8868	18.6234	0.0190838	0.251303	-0.0662135
GALNT6	0.162513	260.154	276.385	0.038506	0.27276	-0.00824882
GALNT7	0.0858159	-2579.29	1838.43	0.0957524	0.0103857	-0.49649
GALNT8	0.13293	-5.57261	5.16421	0.0566302	0.140295	-0.231036
GALNT9	0.000164461	-7813.31	3052.6	0.498465	0.0930635	-0.294951
GALNTL6	0.0688532	-20.2823	14.0584	0.113898	0.0359099	-0.398842
GALT	0.184928	-185.187	480.365	0.0271595	0.207398	-0.139784
GAMT	0.25559	-1122.26	3060.03	0.00708599	0.193361	0.164976
GANAB	0.208903	3178.88	12158.3	0.0190909	0.206412	0.146249
GANC	0.00100895	754.655	409.319	0.399022	0.000269919	0.670607
GAPDH	0.00101103	169109	23834.7	0.398786	5.73401e-06	0.784084
GAPDHP1	3.02044e-05	611.058	53.127	0.580658	2.29826e-07	0.856763
GAPDHP14	0.00177971	187.73	-24.08	0.366644	6.99354e-07	0.834914
GAPDHP2	0.0512877	13.7427	2.87196	0.136314	0.0275972	0.422696
GAPDHP21	0.000186147	68.171	-8.04411	0.492162	2.86872e-06	0.80215
GAPDHP27	0.193171	2.4864	1.08142	0.0249263	0.191845	0.168025
GAPDHP32	0.11344	-8.62062	6.75811	0.0714301	0.22569	-0.11105
GAPDHP33	0.285522	-1.60222	4.96686	0.00218885	0.262607	-0.0537827
GAPDHP38	0.184606	5.19677	6.64411	0.0274366	0.209912	0.135994
GAPDHP39	0.0657793	35.4083	8.16205	0.117578	0.067456	0.336641
GAPDHP40	0.121297	12.0743	10.2281	0.066208	0.0835729	0.308996
GAPDHP42	0.171588	-4.96999	5.92839	0.0325337	0.243886	-0.0887178
GAPDHP44	0.269724	1.64021	3.54205	0.00531775	0.243886	0.0890749
GAPDHP45	0.0870322	3.52368	0.204312	0.0946405	0.132704	0.243008
GAPDHP46	0.139876	2.90781	0.767779	0.0518977	0.132672	0.243412
GAPDHP47	0.00341094	18.2042	-1.75037	0.32765	0.000828081	0.626814
GAPDHP49	0.112917	13.6336	2.37061	0.0725499	0.101653	0.281442
GAPDHP52	0.152417	-3.84328	3.57993	0.0428687	0.249816	-0.0839303
GAPDHP59	0.140448	6.25077	2.44131	0.0509395	0.113276	0.266898
GAPDHP60	0.0397554	32.3482	12.164	0.157989	0.00584362	0.531492
GAPDHP61	0.0533953	16.7239	5.3278	0.13349	0.0387707	0.392376
GAPDHP62	0.108408	4.66623	1.32291	0.0758971	0.11489	0.264303
GAPDHP63	0.167782	12.1881	16.8844	0.0353651	0.0939871	0.293168
GAPDHP65	0.00143704	103.139	14.8738	0.378085	1.84403e-06	0.813958
GAPDHP69	0.00400692	7.78378	-0.69322	0.316465	0.0198636	0.45173
GAPDHP70	0.0182215	16.3785	1.56457	0.217855	0.030851	0.413556
GAPDHP71	0.0559697	6.47318	1.71461	0.128996	0.0390546	0.391698
GAPDHP72	0.00635632	14.3716	2.71028	0.287947	0.00319122	0.563149
GAPDHP73	0.112982	3.26825	0.510054	0.0720665	0.0743898	0.323699
GAPDHS	0.184606	1.7898	0.614319	0.0277358	0.220822	0.120464
GART	0.109312	-1614.37	2290.37	0.0751686	0.0538051	-0.360719
GATM	0.175644	-5753.94	8223.99	0.0305316	0.206412	-0.145135
GBA2	0.259153	-602.778	2441.89	0.00666282	0.262607	-0.0436965
GBA3	0.0648714	-3082.06	1631.31	0.118655	0.0709428	-0.330622
GBE1	0.0254122	2906.97	1533	0.190874	0.0165631	0.465278
GBGT1	0.0590018	662.123	203.668	0.125409	0.00869323	0.506968
GCAT	0.129835	-658.775	763.561	0.0588291	0.145622	-0.22138
GCDH	0.0385907	564.237	695.827	0.160899	0.0225683	0.440086
GCH1	0.161986	210.106	310.414	0.0389319	0.14145	0.228292
GCK	0.291051	-1.96458	9.25827	0.00203101	0.262607	-0.0457029
GCKR	0.164637	-140.524	90.0742	0.0370199	0.164537	-0.203322
GCLC	0.000105303	-1648.32	1538.05	0.521997	3.01797e-05	-0.741279
GCLM	0.0237487	1570.01	1180.93	0.195993	0.00466447	0.544199
GCNT1	0.261724	-151.613	357.79	0.00599181	0.207398	-0.141345
GCNT1P1	0.010337	20.3958	-1.28932	0.255909	0.0176937	0.460507
GCNT1P3	0.273073	1.53739	2.40312	0.00428084	0.250643	0.0726871
GCNT2	0.202961	-197.919	775.771	0.0222014	0.22569	-0.107903
GCNT3	0.00182632	3751.35	-135.333	0.365122	5.16581e-05	0.726119
GCNT4	0.0365329	-147.021	76.5203	0.165602	0.000369708	-0.658418
GCSH	0.019968	307.706	136.127	0.210213	0.00787415	0.513879
GCSHP4	0.137567	3.00067	0.589033	0.0532667	0.220271	0.121638
GCSHP5	0.115558	7.39144	5.22273	0.0698756	0.179553	0.178799
GDA	0.0414739	1435.37	1037.22	0.154778	0.0468854	0.37521
GDAP1	0.000109658	670.002	82.1002	0.519537	1.1031e-06	0.825551
GDAP1L1	0.000919864	115.46	-5.86236	0.404491	0.000849475	0.625573
GDAP2	0.0161179	475.982	319.737	0.22557	0.000742714	0.631815
GDPD1	0.000875453	-312.477	247.675	0.407027	0.000582165	-0.640956
GDPD3	0.037628	354.581	136.169	0.163074	0.059477	0.350686
GFPT1	0.000367586	11562.3	1247.24	0.45785	1.76503e-07	0.861667
GFPT2	0.174573	1334.77	1229.8	0.0313491	0.143992	0.224725
GGCT	0.00694423	-2074.86	1775.65	0.282228	0.00364748	-0.556461
GGCX	0.14023	936.097	1704.27	0.0512974	0.164143	0.203991
GGH	0.0402623	1871.25	220.087	0.156938	0.0166038	0.465055
GGPS1	4.3234e-06	-1605.07	1570.15	0.661094	2.85869e-06	-0.802588
GGT1	0.25559	1537.98	3847.67	0.00742176	0.0980967	0.287371
GGT2	0.000991263	2833.46	-378.229	0.400119	0.000124096	0.697244
GGT5	0.00145922	-3733.31	1827.65	0.377206	0.00128803	-0.607069
GGT6	0.210845	9.93854	3.30426	0.0184268	0.205978	-0.147693
GGT7	0.141125	-587.451	1329.07	0.0504487	0.191845	-0.16676
GK	0.186675	624.651	675.293	0.0266201	0.0774281	0.319029
GK_AS1	0.174573	57.5765	15.8967	0.0315868	0.0342434	0.403969
GK_IT1	0.0133263	93.9395	0.13126	0.238652	0.00202456	0.585666
GK3P	0.194218	3.84669	2.86938	0.0247332	0.174863	0.187291
GK5	0.00171368	-732.117	503.778	0.369102	0.0345653	-0.403077
GKAP1	0.000552602	-931.528	523.448	0.433509	0.0272079	-0.424034
GLA	0.259312	285.601	1002.37	0.00647544	0.250643	-0.0822653
GLB1	0.0549658	1710.5	1302.35	0.130377	0.0281072	0.420913
GLB1L	0.206536	990.351	2544.09	0.0207141	0.143992	0.224948
GLB1L2	0.011615	5230.87	122.713	0.247488	0.00148285	0.600157
GLB1L3	0.156641	-7.74087	7.82297	0.0412779	0.21073	-0.133542
GLCE	0.136991	789.675	769.509	0.0538194	0.13617	0.237878
GLDC	0.155277	374.228	688.391	0.0417059	0.146136	0.220935
GLDCP1	0.136409	-2.93829	2.78242	0.0545043	0.262607	-0.0415596
GLO1	3.15539e-05	-4613.2	3357.73	0.578645	4.14387e-06	-0.79211
GLS	0.123658	-13933.9	14508.2	0.063893	0.118634	-0.260841
GLS2	0.269737	75.505	187.903	0.0052844	0.203235	0.152938
GLUD1	0.00389097	-7937.48	8122.3	0.318815	0.045851	-0.377662
GLUD1P2	0.118677	-17.1571	24.9726	0.068235	0.18606	-0.171665
GLUD1P3	0.140448	75.085	79.0696	0.0510088	0.16783	0.199309
GLUD1P6	0.11344	8.49029	3.72598	0.0714615	0.207398	0.142459
GLUD1P8	0.0030796	52.2692	-5.11066	0.334651	0.0148454	0.472573
GLUD2	0.000556091	-168.379	123.522	0.433123	0.000313916	-0.66481
GLUL	0.529007	-811.751	26492.4	2.38205e-05	0.262607	-0.0503847
GLULP4	0.0315154	13.0432	1.82662	0.175495	0.00630084	0.527033
GLYCTK	0.00197536	1546.1	393.039	0.361173	0.00213727	0.583214
GLYCTK_AS1	0.108408	8.813	2.26847	0.0758376	0.0873272	0.303558
GM2A	0.175644	2174.06	3376.44	0.0305618	0.217281	0.126853
GM2AP2	0.0102491	5.07434	-0.338521	0.256872	0.0028273	0.569559
GMDS	0.0909217	-294.355	699.905	0.0909013	0.0554649	-0.358266
GMDS_AS1	0.227461	-73.3232	306.837	0.0129825	0.209102	-0.138669
GMPPA	4.80671e-05	5481.02	1175.81	0.557241	6.42375e-07	0.837144
GMPPB	0.0156159	7.92074	0.11977	0.227589	0.0084902	0.509034
GMPR	0.160514	-410.908	368.708	0.0396648	0.250643	0.0764688
GMPR2	0.000444804	-2963.6	2595.15	0.445654	6.43941e-05	-0.719877
GMPS	0.0509966	-1949.79	2194.76	0.137156	0.0229329	-0.438971
GMPSP1	0.0316312	-10.8881	8.29579	0.175225	0.0169881	-0.463272
GNE	0.000953718	-2034.35	1526.7	0.402572	0.000814977	-0.627579
GNMT	0.0925313	17.9847	15.4455	0.0891391	0.113276	0.267083
GNPAT	0.0541157	-838.997	2328.45	0.13215	0.0432701	-0.38279
GNPDA1	0.174573	774.271	2034.59	0.0319617	0.15603	0.211794
GNPDA2	0.000670776	-745.916	758.895	0.421908	0.000192367	-0.682646
GNPNAT1	0.000436846	-632.405	434.844	0.447307	0.000140621	-0.692901
GNS	0.0776023	13390.4	8835.4	0.103818	0.0559152	0.357152
GOT1	0.171174	-989.769	2253.96	0.0330067	0.0878041	-0.302977
GOT2	0.0541741	-2639.84	2965.71	0.131894	0.0797985	-0.315908
GOT2P3	0.0673737	4.99263	-0.108025	0.115643	0.0346555	0.402712
GPAA1	0.000497087	20668.5	1587.62	0.440061	0.00066527	0.635605
GPAM	0.210332	-56.0939	354.72	0.0185294	0.207398	-0.14402
GPAT2	0.130264	-124.45	108.447	0.0585582	0.250643	-0.0702264
GPCPD1	0.273073	-419.924	1821.19	0.0041076	0.253018	-0.0646529
GPD1	0.015795	6723.67	423.794	0.226757	0.00240433	0.577417
GPD1L	0.129414	-180.492	492	0.0595376	0.0970008	-0.289155
GPD2	0.127385	-2192.49	2115.45	0.0606184	0.0484908	-0.371866
GPHN	0.00305568	-437.772	378.599	0.335343	0.000383133	-0.656784
GPI	0.240573	-2522.74	12976.4	0.0109044	0.250643	-0.0715641
GPIHBP1	0.00773574	-1864.11	892.618	0.27491	0.133945	-0.241668
GPLD1	3.14e-06	-271.119	136.966	0.687939	1.02924e-06	-0.827111
GPT	0.00924915	5195.52	-170.598	0.26322	0.00712467	0.519899
GPT2	4.56067e-05	9174.96	-772.07	0.561968	1.38322e-06	0.821092
GPX1	0.00353931	27780.9	6865.95	0.324744	0.000889081	0.623343
GPX1P1	0.000948389	2448.37	179.427	0.402927	3.05676e-06	0.79969
GPX1P2	0.371485	-0.207091	2.46108	0.000229363	0.251303	0.0663989
GPX2	0.212296	7.49081	13.2693	0.0177959	0.197933	0.160741
GPX3	0.00050942	545158	-40910.2	0.43853	0.0001325	0.69513
GPX4	0.0244244	31078.6	11228.2	0.193832	0.0232968	0.436742
GPX7	0.0957959	279.229	170.887	0.0867643	0.106645	0.275109
GPX8	0.0126603	-3230.61	2407.71	0.242052	0.00471047	-0.54353
GRHPR	0.00445175	-3328.34	2974.63	0.310626	2.16867e-05	-0.749974
GSR	0.0870322	-3383.08	3549.07	0.094828	0.0628864	-0.343329
GSS	8.27545e-05	7190.8	892.087	0.531102	5.68186e-06	0.78453
GSTA1	0.000805534	-14137.4	6077.61	0.411966	1.85791e-05	-0.754433
GSTA2	0.261724	-638.552	1182.17	0.00610277	0.262607	0.0280906
GSTA4	4.07328e-07	-2847.83	1470.44	0.758125	4.12219e-06	-0.793001
GSTK1	0.236832	-3103.09	9844.17	0.0112582	0.22569	-0.110802
GSTM2	0.121781	418.331	542.782	0.0657279	0.101221	0.282689
GSTM3	0.00453971	-1185.03	699.381	0.309424	0.0714652	-0.32973
GSTM3P1	0.170698	-2.4923	1.74487	0.0334332	0.251303	-0.0669031
GSTM4	0.167782	-771.29	1270.15	0.0355271	0.13617	-0.23877
GSTM5	0.00348128	-122.583	52.5116	0.326005	0.0030399	-0.565674
GSTO1	0.169171	-1800.81	4654.14	0.0343239	0.16796	-0.199086
GSTO2	0.0252967	695.324	146.098	0.191351	0.00461003	0.544868
GSTP1	0.922991	-4.83615	10544.3	4.21171e-08	0.262607	0.0552894
GSTT1	1.7136e-05	-4899.22	2136.87	0.605893	1.38322e-06	-0.820945
GSTT2	0.000400492	-93.5565	60.198	0.453504	0.000616607	-0.638503
GSTT2B	0.00379806	-20.8795	14.5127	0.320316	0.00324279	-0.562257
GSTZ1	0.0337811	-211.518	343.456	0.170878	0.0231894	-0.437856
GUCY1A2	0.00011137	-3526.67	1895.58	0.518744	2.1567e-05	-0.750197
GUCY2C	0.0782067	55.8141	50.7736	0.102604	0.102005	0.280906
GUCY2D	0.00173052	174.703	-7.80876	0.368456	0.00055023	0.642962
GUK1	0.00806408	24964.1	6052.9	0.272448	2.86872e-06	0.802142
GUSB	0.0105672	-6785.9	6092.18	0.254288	0.00291663	-0.568054
GUSBP1	0.0279634	-471.089	457.41	0.183988	0.11869	-0.260395
GUSBP2	0.273073	-9.73149	73.4131	0.00292174	0.262607	-0.0298741
GUSBP3	0.00896214	-116.715	77.8145	0.265317	0.154275	-0.213355
GUSBP4	0.223685	-10.1552	19.8976	0.0139803	0.222508	-0.117267
GUSBP5	0.0533987	58.5152	15.1224	0.13333	0.0621279	0.345782
GUSBP8	0.164637	2.09271	0.81718	0.0371317	0.193361	0.165137
GUSBP9	0.0281015	47.8053	20.268	0.183333	0.0371323	0.396389
GXYLT1	0.321847	-16.4838	1025.04	0.000551961	0.27276	0.00691117
GXYLT2	0.255006	83.6856	310.828	0.00844988	0.21073	0.134433
GYG1	0.0266461	-1328.12	1667.73	0.187541	0.0353202	-0.400402
GYG2	0.25559	-60.6349	96.4172	0.00743734	0.217354	0.126631
GYS1	0.000348265	11839	497.713	0.461098	0.000659342	0.636051
GYS2	2.93927e-05	227.874	-21.9166	0.581825	1.74002e-06	0.815073
H6PD	0.00012505	35838.8	1677.95	0.512192	1.51848e-06	0.818863
HAAO	0.111344	2159.58	752.87	0.0737093	0.130865	0.245012
HADH	0.14549	523.71	1029.64	0.0466369	0.11869	0.259058
HADHA	0.06598	4390.96	6070.22	0.117349	0.0755838	0.32215
HADHAP1	0.00118048	452.976	-58.8879	0.389668	0.000220533	0.677741
HADHB	0.198153	-995.534	4607.46	0.0236775	0.182621	-0.174563
HAGH	0.00109449	10228.7	816.669	0.394079	0.000216371	0.678856
HAGHL	0.149586	-847.721	984.806	0.0441166	0.0706271	-0.331068
HAL	0.0970675	74.9182	19.5781	0.0857128	0.0178655	0.459705
HAO2	0.102515	397.421	66.855	0.0811628	0.0986429	0.286033
HCCS	0.129691	-375.008	697.137	0.0590092	0.13617	-0.238101
HDC	0.00264447	-138.196	81.5736	0.343675	0.0010767	-0.614649
HDDC2	3.52768e-06	-5155.15	2855.02	0.680365	6.70543e-06	-0.780517
HDDC3	0.273073	45.3252	298.755	0.00391652	0.219706	0.123955
HEPH	0.001102	-1956.66	981.137	0.393554	0.0464961	-0.375879
HEPHL1	0.00304126	72.6223	17.2765	0.335954	0.00157923	0.597482
HEXA	0.265423	-347.198	1657.7	0.00551216	0.211252	0.131535
HEXA_AS1	2.76152e-05	101.224	-1.08979	0.584392	2.85913e-05	0.743063
HEXB	0.00504966	-8609.6	7905.58	0.302517	0.00808974	-0.512096
HEXDC	0.112917	1046.46	1373.09	0.0727357	0.113276	0.266638
HGD	0.0397251	2580.09	1385.71	0.158364	0.102005	0.280906
HGSNAT	4.7454e-05	-4073.97	4108.79	0.558254	5.24534e-05	-0.725673
HIBADH	7.7209e-05	-6992.05	4712.8	0.535182	0.000818527	-0.627356
HIBCH	0.00917063	-2172.55	1924.04	0.263753	0.00342302	-0.559805
HK1	0.322719	181.874	4764.23	0.000528061	0.262607	0.0423588
HK2	0.175644	1665.56	2244.08	0.0302967	0.174268	0.189277
HK2P1	0.529007	0.0461813	1.24254	1.55052e-05	0.262607	0.0214889
HK3	0.129414	1884.01	435.01	0.059692	0.0109242	0.493369
HKDC1	0.000125094	12141.2	-831.112	0.511965	2.29826e-07	0.857877
HLCS	0.0915557	-310.673	920.042	0.0905011	0.0625992	-0.343998
HLCS_IT1	0.259957	1.69708	2.25691	0.00622388	0.249816	0.0857455
HMBS	0.248684	-339.561	877.247	0.00996585	0.168421	0.196857
HMGCL	0.00127601	4684.93	986.517	0.385302	2.229e-05	0.749305
HMGCLL1	0.0266461	-16.7966	7.68988	0.187498	0.0577658	-0.353424
HMGCR	1.72111e-05	-1447.04	1090.47	0.605305	1.30108e-05	-0.765357
HMGCS1	0.0269002	649.209	553.272	0.186641	0.0115957	0.490025
HMGCS2	0.143457	20.6458	1.11469	0.048271	0.0135608	0.478748
HMOX1	0.0461779	53781.9	2415.59	0.145451	0.00183404	0.590794
HMOX2	0.00627385	4232.66	1934.02	0.28866	0.00503459	0.53974
HNMT	0.0077522	-8718.31	6393.17	0.274715	0.000894661	-0.622897
HOGA1	0.161986	915.288	840.777	0.0388371	0.138265	0.233419
HPD	0.00609205	5173.55	-464.906	0.290431	1.40734e-05	0.76335
HPDL	0.315252	3.21992	18.671	0.00118875	0.249816	0.0844947
HPGD	0.112917	-9883.89	5601.13	0.0726649	0.000832872	-0.626464
HPGDS	0.0239652	-162.637	130.215	0.195112	0.0179514	-0.459259
HPRT1	0.171485	-307.792	1055.79	0.0326753	0.158191	-0.209565
HPSE	0.125636	645.266	271.421	0.0626262	0.205646	0.148925
HPSE2	0.0309644	-8.05286	4.40879	0.177126	0.0118774	-0.488199
HS2ST1	0.0252967	1340.53	1182.08	0.191437	0.00309496	0.56471
HS3ST1	0.0133668	937.803	240.764	0.238413	0.0214001	0.444767
HS3ST2	0.332556	-30.3574	177.589	0.000445959	0.256717	-0.0628694
HS3ST3A1	0.142726	-644.682	434.189	0.0488091	0.130477	-0.245681
HS3ST3B1	0.199122	81.4826	105.454	0.0233306	0.218967	0.125293
HS3ST5	0.206406	1.44557	0.54677	0.0212265	0.209102	0.138677
HS6ST1	0.0655457	-1170.84	1588.45	0.117909	0.0241917	-0.434066
HS6ST1P1	0.140121	-7.41387	9.80867	0.0514624	0.105284	-0.27667
HS6ST2	0.162897	10.0609	2.38754	0.0380544	0.185852	0.172271
HSD11B1	0.255006	-25.8803	59.3444	0.00798533	0.250643	-0.0715641
HSD11B1L	0.00305568	715.676	111.101	0.335263	8.67309e-05	0.709844
HSD11B2	0.00914696	-2610.13	1185.62	0.264129	0.0405118	-0.388586
HSD17B1	0.0506637	72.5569	52.6938	0.138121	0.0835729	0.308996
HSD17B10	0.138863	-1244.31	2859.93	0.0526657	0.130309	-0.24635
HSD17B11	0.212296	-539.245	1925.86	0.0174254	0.16179	-0.205998
HSD17B12	0.146838	866.872	1760.63	0.0460373	0.172901	0.192175
HSD17B13	0.010302	-43.7197	26.8977	0.256347	0.00301304	-0.56627
HSD17B14	0.017051	4954.11	755.116	0.222221	0.0013787	0.603947
HSD17B1P1	0.248684	13.6035	35.7459	0.00957025	0.21073	0.134211
HSD17B2	0.113442	72.0433	30.5001	0.071246	0.0916495	0.297403
HSD17B3	0.0545781	120.554	21.3857	0.131114	0.018051	0.45859
HSD17B4	0.203536	964.533	3683.53	0.0218188	0.262607	-0.0383459
HSD17B6	0.206536	-20.8697	32.4021	0.0206807	0.161229	-0.206889
HSD17B7	0.014337	1071.82	380.404	0.234315	0.00687967	0.521682
HSD17B7P2	0.212296	82.5524	143.86	0.0176695	0.197933	0.160518
HSD17B8.1	0.316897	-41.5054	603.216	0.000829626	0.262607	-0.0334412
HSD3B2	0.371485	-1.2854	13.9269	0.000190632	0.262607	0.0417085
HSD3B7	0.000186147	39069.8	-1242.71	0.492576	1.02283e-07	0.871254
HYAL1	0.135784	1197.42	338.707	0.0551427	0.179433	0.181251
HYAL2	0.0013708	-6179.25	3659.56	0.38112	0.00839747	-0.509643
HYAL3	0.422449	1.23819	46.163	4.8097e-05	0.21073	-0.134211
HYAL4	3.59927e-05	510.753	-73.7024	0.572632	3.24286e-08	0.89499
HYI	0.000281825	2426.19	172.29	0.472045	0.000696664	0.634044
HYI_AS1	0.126524	16.7839	14.3962	0.0621292	0.138778	0.232528
HYKK	0.00832311	-80.3849	92.8441	0.27009	0.00239544	-0.57764
ICMT	0.206536	-1057	3456.85	0.0209446	0.202236	-0.154052
IDH1	0.143202	3900.36	3243.58	0.0485569	0.050661	0.366515
IDH1_AS1	0.916246	0.0473717	16.1126	5.05616e-07	0.262607	0.0354476
IDH2	0.00332757	16262.2	3830.41	0.32933	0.00419264	0.549327
IDH3A	0.121705	-442.485	644.485	0.0658246	0.0929812	-0.295397
IDH3B	0.0072563	-3256.02	3572.37	0.278664	0.0138315	-0.47754
IDH3G	0.00806865	-1266.67	2179.5	0.272172	0.0018817	-0.589679
IDI1	0.000679809	-724.361	1002.55	0.421244	0.000429686	-0.652549
IDNK	0.0341588	-653.879	466.726	0.170063	0.128091	-0.24791
IDO1	0.184464	786.348	493.852	0.0278167	0.262607	0.052837
IDO2	0.292982	1.72431	9.01673	0.00182729	0.262607	-0.0448112
IDS	0.158817	-1996.31	5154.71	0.0401656	0.198396	-0.159849
IDS.1	0.00986619	71.0464	1.86316	0.259368	0.0204721	0.449003
IDSP1	0.0260614	14.5776	1.88116	0.188838	0.0626949	0.343775
IDUA	0.149845	890.214	1219.83	0.0437251	0.204825	0.1516
IL4I1	0.29723	-152.645	669.968	0.00150916	0.207398	-0.143797
IMPA1	0.206536	218.038	1116.65	0.0201395	0.250643	0.0802588
IMPA1P	0.00347038	14.3567	-0.86915	0.32625	0.00468666	0.543913
IMPA2	0.0880231	-4011.59	4688.33	0.0934699	0.080936	-0.312786
IMPDH1	0.167782	1415.43	1751.42	0.0353232	0.138265	0.233419
IMPDH1P10	0.00172444	44.6513	-0.112415	0.36872	0.00248237	0.575857
IMPDH1P11	0.272949	0.673379	0.828033	0.00503149	0.262607	-0.0555242
IMPDH1P6	0.0445956	12.101	-0.801742	0.148024	0.0523872	0.363552
IMPDH2	0.251158	-479.414	2937.2	0.00926238	0.262277	-0.0564041
INMT	0.162044	-363.883	255.048	0.0386713	0.032291	-0.409543
INPP1	0.000325164	-3047.93	1796.36	0.465071	0.000792449	-0.62914
INPP4A	0.200727	442.607	988.261	0.0230262	0.143992	0.224056
INPP4B	0.00313909	-2288.62	1463.6	0.333208	0.0103285	-0.496936
INPP5A	7.7209e-05	-1203.48	961.842	0.535292	4.07787e-05	-0.732807
INPP5B	9.46356e-06	1021.82	379.752	0.63209	1.62125e-06	0.817079
INPP5D	0.00122172	5858.37	713.74	0.387593	2.94657e-06	0.800804
INPP5E	0.0030796	-974.842	1098.07	0.334603	0.0028273	-0.569614
INPP5F	0.0857622	-416.141	754.029	0.096019	0.0337379	-0.405307
INPP5J	0.273073	30.592	86.6073	0.00451478	0.158191	0.209565
INPP5K	4.10761e-06	-2685.91	2192.1	0.670276	7.91781e-07	-0.832239
INPPL1	3.45528e-05	8059.12	3508.31	0.575245	1.75955e-05	0.756216
IPMK	2.17482e-05	1616.76	309.967	0.593189	9.7376e-08	0.874375
IPMKP1	0.000953718	10.0467	-0.0223882	0.402545	0.00031933	0.663989
IPPK	0.0384997	69.162	62.2815	0.161171	0.0215441	0.443876
ISYNA1	0.0747096	-3306.54	2985.02	0.10627	0.0333298	-0.406867
ITPA	0.273073	-221.98	1886.65	0.00309352	0.201333	-0.155836
ITPK1	0.00914696	3555.08	2456.6	0.264145	0.000477593	0.648536
ITPK1_AS1	0.121691	11.3519	4.91449	0.0658996	0.0906163	0.298964
ITPKA	0.0191682	1419.27	175.439	0.21374	0.00552108	0.534613
ITPKB	0.0254538	-1218.59	1172.01	0.19067	0.0737873	-0.325494
ITPKB_IT1	0.110071	4.36723	1.20836	0.074503	0.0899349	0.300247
ITPKC	0.0922023	2054.23	2199.04	0.0900232	0.180386	0.177015
IVD	0.371485	-72.8376	3412.09	0.000220663	0.262607	-0.0256382
JMJD7_PLA2G4B	0.10806	187.145	92.4541	0.0761337	0.182967	0.173894
KDSR	0.00452339	-3748.08	3751.88	0.30969	0.0218605	-0.442761
KHK	0.0326824	7961.99	447.034	0.173143	0.0418845	0.385465
KL	0.0444703	-2907.27	1908.58	0.148645	0.08054	-0.313901
KLB	0.255006	3.4997	7.271	0.00878107	0.136852	0.235872
KLC1	0.255006	180.858	658.144	0.00769514	0.249816	0.0858323
KLC2	0.0213944	843.698	823.403	0.205185	0.0681521	0.33508
KLC3	0.251158	-45.2814	63.0614	0.00929633	0.191906	0.166556
KLC4	0.13604	1190.63	1155.99	0.0549812	0.0382906	0.393491
KLF1	0.292982	1.7249	4.3649	0.00196358	0.223979	0.113507
KLF10	0.0189895	5884.32	661.46	0.214413	0.0119834	0.487572
KLF11	0.0196341	1211.41	556.27	0.211925	0.00487569	0.541301
KLF12	0.000953718	-1656.16	1326.99	0.402505	0.00109991	-0.613757
KLF13	0.0597089	-1665.45	4499.09	0.124614	0.0906163	-0.29941
KLF15	0.292982	260.144	1216.53	0.00192107	0.250643	0.0789211
KLF16	0.000795097	3269.22	616.459	0.412866	0.000244618	0.673951
KLF17	0.202961	-11.2677	9.58642	0.0226746	0.234123	-0.0965384
KLF17P1	0.000919864	45.9497	-3.23371	0.404549	0.000239046	0.674843
KLF2	0.0109762	-7772.11	4348	0.250983	0.0344312	-0.403523
KLF2P2	0.0765177	-7.13136	5.80195	0.104782	0.0594757	-0.350799
KLF3	0.168103	474.894	1151.36	0.0348179	0.0905016	0.299633
KLF3P1	0.0881855	10.7679	1.14208	0.0931992	0.13617	0.239303
KLF4	0.31077	271.506	1426.02	0.00138068	0.130477	0.245681
KLF5	0.216646	-314.328	550.139	0.0162474	0.167407	-0.20087
KLF6	0.208903	12565.5	18517.8	0.0192569	0.205625	0.149816
KLF7	0.0188436	-4900.46	3896.58	0.215562	0.13617	-0.236986
KLF7_IT1	0.136684	21.5242	9.30162	0.0541176	0.0867398	0.304538
KLF8	0.273073	-192.467	871.871	0.00359839	0.262607	-0.0294282
KLF9	0.000416008	-17836.2	8776.64	0.450333	0.152409	-0.214915
KLHDC1	0.0528191	-272.425	260.88	0.134432	0.126465	-0.25014
KLHDC10	0.174573	1130.48	3377.04	0.0314846	0.164405	0.203545
KLHDC2	0.922991	-2.00896	2035.18	1.16469e-07	0.249816	0.0847176
KLHDC3	0.000264263	-3178.39	3207.66	0.475443	6.67388e-06	-0.78074
KLHDC4	0.000406798	3342.67	801.428	0.451699	3.41326e-06	0.797237
KLHDC7A	0.000201163	3756.41	136.716	0.487025	2.92254e-05	0.742171
KLHDC7B	0.000458852	19101.3	-2260.22	0.44387	2.86872e-06	0.801473
KLHDC8A	0.00070075	-679.975	286.017	0.419374	0.0555582	-0.35782
KLHDC8B	0.0230787	-971.136	1109.39	0.19823	0.0939063	-0.29339
KLHDC9	0.000259513	762.51	126.562	0.476813	0.000113472	0.700481
KLHL10	0.0920382	-28.5897	13.5482	0.0901808	0.11869	-0.259636
KLHL11	0.385457	0.750241	32.7862	7.46237e-05	0.262607	0.0167206
KLHL12	0.130009	531.812	1417.65	0.0587059	0.133194	0.24256
KLHL13	0.0197867	-633.933	455.827	0.210845	0.00471047	-0.54353
KLHL14	0.107333	-336.426	187.592	0.0772078	0.00256769	-0.574296
KLHL15	0.00151695	-278.675	354.758	0.375217	0.000182198	-0.684875
KLHL17	0.00231026	952.501	418.01	0.351362	0.00260652	0.573627
KLHL18	0.216646	87.8196	350.996	0.0160276	0.243886	0.0889535
KLHL2	0.0550564	-1394.01	1374.22	0.130169	0.045851	-0.377662
KLHL20	0.144028	-211.628	744.091	0.0479425	0.169323	-0.196188
KLHL21	7.84011e-05	6291.27	725.695	0.533821	3.29873e-06	0.798129
KLHL22	0.031393	-590.673	1008.36	0.175932	0.0241388	-0.434289
KLHL22_IT1	0.174573	-11.7514	16.2743	0.0313585	0.167276	-0.201316
KLHL23	0.00273041	-1385.18	772.667	0.342149	0.0561942	-0.355814
KLHL24	0.198153	-494.431	2029.37	0.0237038	0.193361	-0.165422
KLHL25	0.0257533	250.709	146.073	0.18961	0.0145431	0.47375
KLHL26	0.273073	-23.5559	370.834	0.00263828	0.221589	0.118382
KLHL28	0.0235527	-451.89	531.401	0.196816	0.157093	-0.210456
KLHL29	0.25559	-97.1052	624.497	0.00736076	0.499932	-0.000222941
KLHL2P1	0.000442081	301.263	-27.3562	0.446342	0.000414561	0.654109
KLHL3	0.00413032	488.847	59.1811	0.314671	0.00382809	0.553563
KLHL30	0.145533	-27.5304	33.9271	0.0464256	0.179511	-0.180805
KLHL31	0.000715499	-197.593	127.405	0.418413	0.00281715	-0.569837
KLHL32	1.07282e-05	-404.43	186.175	0.624644	4.71559e-05	-0.728571
KLHL33	0.273073	1.42084	2.51737	0.0042747	0.262607	0.0230142
KLHL34	0.0876756	4.15842	0.336855	0.0938362	0.108461	0.272955
KLHL35	0.01027	336.589	-6.94319	0.256591	0.00306704	0.565156
KLHL36	0.273073	-282.986	3072.73	0.00471963	0.262607	-0.0249694
KLHL38	0.0725449	-9.94216	7.25749	0.108774	0.0836509	-0.308559
KLHL4	0.0933738	-2541.47	1403.51	0.0883965	0.000216371	-0.67882
KLHL41	0.122862	-6.77303	9.03371	0.0644495	0.111484	-0.269313
KLHL42	0.0188824	763.368	661.294	0.215016	0.101577	0.28202
KLHL5	0.00106185	-1669.13	1556.08	0.395571	0.00507399	-0.539072
KLHL6	0.0305715	1534.34	238.475	0.178122	0.00028833	0.668154
KLHL6_AS1	0.000109292	356.077	-48.5914	0.520294	1.52526e-05	0.760675
KLHL7	0.000148282	-1383	1059.15	0.503739	0.0015918	-0.597036
KLHL7_AS1	0.00141205	-105.065	63.8476	0.378942	0.00784206	-0.514325
KLHL8	0.216646	-177.632	1191.45	0.0161512	0.220133	-0.123509
KLHL9	4.18628e-06	-2790.98	1903.03	0.667316	8.68989e-07	-0.83001
KLK1	0.216646	-13.5981	12.0311	0.0159058	0.250643	-0.0714384
KLK10	0.261724	-1.79034	3.19155	0.00611358	0.259908	-0.0612132
KLK11	0.184825	-24.1417	12.058	0.0272921	0.176883	-0.184188
KLK13	0.292572	2.05436	3.82123	0.0019915	0.219706	0.12474
KLK14	0.0709136	11.505	6.02409	0.11048	0.0621279	0.346005
KLKB1	0.0997269	-286.6	240.558	0.083223	0.0939063	-0.293613
KLLN	0.24117	-21.5032	72.5204	0.0108264	0.251303	-0.0664364
KLRAP1	0.063633	490.508	122.707	0.119923	0.0789887	0.317022
KLRB1	0.229194	-49.4677	206.474	0.0121048	0.143992	-0.223833
KLRC1	0.129414	54.1365	36.3872	0.0596421	0.102005	0.280683
KLRC2	0.273073	-9.7251	24.9478	0.00276444	0.174863	0.187716
KLRC3	0.175143	3.99622	2.31572	0.0307049	0.235843	0.0936208
KLRC4	0.255006	4.33502	4.94277	0.00845098	0.203934	0.152306
KLRC4_KLRK1	0.340799	-1.27508	11.6386	0.000416355	0.262607	-0.042475
KLRD1	0.00764164	-222.309	195.358	0.275683	0.001802	-0.591686
KLRF1	0.142726	-42.4103	51.1894	0.0490434	0.262607	-0.0510535
KLRF2	0.0232027	35.9869	0.658048	0.197848	0.0699991	0.331959
KLRG1	0.114439	54.8559	62.4721	0.0705095	0.063369	0.342438
KLRG2	0.00720633	158.572	-22.1768	0.279331	1.80196e-05	0.755385
KLRK1	0.232254	18.3888	23.371	0.0116908	0.234148	0.0960876
KMO	0.148878	938.691	466.158	0.04461	0.141577	0.228069
KMT2A	0.206406	-423.528	3020.15	0.0212179	0.11489	-0.264408
KMT2B	0.099158	34.8567	19.3609	0.0836314	0.13617	0.239216
KMT2C	0.345832	-60.54	3077.14	0.000330826	0.253018	-0.0646529
KMT2D	0.0224576	2565.98	2386.26	0.201111	0.00182695	0.591017
KMT2E	0.000259513	-5330.03	6408.51	0.477057	0.000324824	-0.66325
KMT2E_AS1	0.160514	399.334	377.827	0.0396821	0.22569	0.110802
KYNU	0.0270705	1391.79	104.456	0.185986	0.00049472	0.646975
L2HGDH	0.0085884	-494.143	378.412	0.268207	0.0133078	-0.479992
L3HYPDH	0.00708633	-460.125	552.481	0.280508	0.00252936	-0.574965
LACC1	0.15493	-393.286	723.281	0.0419842	0.207398	-0.140899
LANCL1	0.00101103	-1870.28	2287.2	0.398814	0.000542703	-0.643631
LAP3	0.922991	3.84394	3378.12	1.4633e-07	0.262607	-0.0425817
LAP3P2	0.371485	0.189733	1.94816	0.000209036	0.262607	0.0302149
LBR	0.0536761	-2537.67	2902.2	0.132832	0.0157093	-0.468845
LCAT	0.109401	802.775	459.87	0.0750605	0.0999048	0.28425
LCLAT1	0.0779037	-228.589	460.968	0.103456	0.110078	-0.271096
LCT	0.168103	-3.20373	3.58656	0.0347602	0.22569	-0.111049
LCTL	0.119678	-12.8294	13.4021	0.0673246	0.15107	-0.21603
LDHA	0.031393	117025	28176.5	0.175941	0.0107976	0.494037
LDHAL6A	0.200406	-10.3174	18.8765	0.0231201	0.190815	-0.169435
LDHAL6B	0.22458	9.17414	12.1306	0.0136786	0.176883	0.183926
LDHAL6EP	0.00642389	28.6884	-2.00077	0.286969	0.024722	0.432318
LDHAL6FP	0.255006	1.45828	1.14316	0.00864862	0.218703	0.12558
LDHAP2	0.119444	4.70815	1.98221	0.0676067	0.149749	0.218133
LDHAP3	0.0438567	-21.0281	16.1748	0.149917	0.016146	-0.467285
LDHAP4	0.0051773	-198.112	134.678	0.301061	0.00350036	-0.558244
LDHAP5	0.112917	10.6211	4.82916	0.0722215	0.173001	0.191506
LDHAP7	0.000497087	-29.5523	17.2218	0.439935	0.000417393	-0.653663
LDHB	0.13538	13381.3	14818.7	0.0555821	0.0654364	0.339539
LDHBP1	0.208903	1.21595	0.679261	0.0188765	0.222508	0.116976
LDHBP2	0.185529	-3.4448	4.57119	0.0270143	0.179553	-0.178998
LDHC	2.56363e-05	189.217	-21.0082	0.587308	5.0139e-08	0.882125
LDHD	0.00748206	964.292	103.009	0.276958	0.000300753	0.666371
LFNG	0.184091	238.798	410.95	0.0279305	0.21073	0.132873
LHPP	0.000186307	1989.77	463.613	0.491515	0.00012953	0.695799
LIAS	0.00576701	-658.861	622.356	0.293781	0.0972352	-0.288709
LIPA	0.292982	1101.68	5552.5	0.00183963	0.191906	-0.166537
LIPC	0.149786	-2229.85	1803.9	0.0438751	0.262607	-0.0477094
LIPG	0.012339	-570.642	306.145	0.243794	0.000864693	-0.624904
LIPT1	0.000541216	-318.395	290.595	0.43446	0.000348191	-0.660574
LIPT1P1	0.154744	-4.37758	3.58423	0.0421496	0.235533	-0.0948059
LIPT2	0.0301736	65.0532	41.2164	0.178959	0.0141419	0.475756
LPCAT1	0.000125094	60135.4	-694.23	0.511607	4.29309e-05	0.73147
LPCAT2	0.273073	-182.053	1005	0.0035855	0.238311	-0.0927435
LPCAT3	1.77646e-05	15382.2	-928.061	0.602624	1.02283e-07	0.871477
LPCAT4	0.273073	-206.827	1162.98	0.00397833	0.262607	0.0200647
LPGAT1	0.00297522	5700.4	1890.44	0.337267	0.000299281	0.666594
LPIN1	0.12301	-683.366	1150.2	0.0643226	0.12257	-0.253707
LPIN2	0.371485	-84.4319	2600.07	0.000160899	0.250643	0.0827111
LPIN3	4.41617e-05	17774.3	-1166.39	0.564136	8.53495e-05	0.710513
LPL	0.0925313	-729.021	665.922	0.0896954	0.218159	-0.125962
LRAT	0.000148282	628.963	50.5216	0.504228	3.87234e-05	0.734145
LRTOMT	5.49207e-05	700.163	160.83	0.551957	3.35544e-06	0.797683
LSS	0.0541157	844.391	902.555	0.132089	0.0737873	0.325717
LTA4H	0.0779037	-1676.34	3379.06	0.103208	0.0621279	-0.345559
LTC4S	0.273073	0.93285	1.57992	0.00342077	0.262607	-0.0542886
LYPLA1	0.00885289	3598.41	1626.79	0.266187	0.00298102	0.566939
LYPLA1P3	0.255006	1.46833	2.39712	0.0085357	0.23919	0.0918425
LYPLA2	0.000825561	3870.36	1871.32	0.410349	0.00233228	0.578755
LYPLA2P1.2	0.261724	0.94537	2.29783	0.00606936	0.297918	-0.00401473
MAGT1	0.0175716	6425.49	3928.11	0.220284	0.00644174	0.525695
MAN1A1	0.075957	3315.29	1989.08	0.105215	0.0621279	0.345782
MAN1A2	0.194218	1037.14	3362.55	0.0247332	0.127193	0.249471
MAN1B1	0.00819185	4404.72	3423.48	0.271134	0.00687967	0.521682
MAN1C1	0.0464195	827.679	179.847	0.145026	0.0322778	0.409766
MAN2A1	0.000795667	-5187.38	3902.4	0.412591	0.000279121	-0.669492
MAN2A2	0.195769	942.056	2617.21	0.024421	0.155901	0.212017
MAN2B1	0.273073	797.267	3670.95	0.00294098	0.22569	0.111471
MAN2B2	0.00494124	2677.43	1653.75	0.303885	0.000932128	0.620891
MAN2C1	0.273073	780.601	5356.7	0.00444303	0.262607	0.0479323
MANBA	0.316897	-160.274	2342.98	0.000902505	0.253018	0.0653217
MANBAL	0.00313909	3390.33	1177.99	0.333262	0.000243396	0.674174
MAOA	0.00373397	28377.9	214.893	0.321193	0.000136245	0.694239
MAOB	0.273073	-1364.41	4447.41	0.00487676	0.262607	-0.0309888
MARS2	0.0444703	-343.583	290.074	0.148784	0.00166657	-0.594807
MAT1A	0.529007	23.4777	575.909	2.19457e-05	0.113276	0.267306
MAT2A	0.11154	6102.1	4350.62	0.0735603	0.0939871	0.292945
MAT2B	0.241727	-587.013	3495.4	0.0106216	0.499932	0.00111471
MBOAT1	0.255006	-72.4827	380.941	0.00759184	0.261208	-0.0588564
MBOAT2	0.000123337	1601.15	106.045	0.513309	7.88869e-06	0.77695
MBOAT7	0.00118403	5889.21	1661.26	0.389017	0.000616607	0.638503
MCAT	0.206536	-290.248	977.505	0.0203474	0.262607	-0.0477094
MCCC1	0.316897	54.2698	993.794	0.000882018	0.243886	0.0880617
MCCC1_AS1	0.00118048	102.394	-5.39616	0.389384	0.000864693	0.624904
MCCC2	5.77573e-05	-4598.7	3388.36	0.549135	4.32043e-05	-0.731024
MCEE	0.088774	152.931	369.349	0.0926211	0.134075	0.241445
MDH1	0.141125	-1282.78	3922.83	0.0499717	0.149749	-0.218036
MDH1B	0.248684	41.8583	103.96	0.00980622	0.199205	0.157173
MDH2	0.107355	-6256.04	7557.57	0.0771262	0.0841008	-0.307659
ME1	0.273073	-209.869	658.059	0.0047638	0.191845	-0.167875
ME2	0.26403	-508.964	1789.16	0.00571423	0.174863	-0.187939
ME3	0.00657781	1557.95	655.629	0.285562	0.0143961	0.474642
MECOM	0.000112763	-2617.06	1716.36	0.517787	0.000116734	-0.699589
MECR	0.00555233	1060.65	511.384	0.29614	0.00864909	0.507637
MFNG	0.273073	-72.26	816.234	0.00415946	0.176883	-0.184372
MGAM	0.0205431	-3248.61	1611.92	0.208179	0.13617	-0.237432
MGAT1	0.0052003	14871.6	6318.19	0.300756	0.000480817	0.64809
MGAT2	0.184606	-14.8316	27.1988	0.0276581	0.209912	-0.136886
MGAT3	0.0228457	11494.2	861.605	0.199479	0.00342302	0.559805
MGAT4A	0.259153	558.681	2314.37	0.00674987	0.262607	0.0307659
MGAT4B	0.0116799	14456.6	4597.42	0.247124	0.0048375	0.54197
MGAT5	0.216646	261.032	1744.75	0.015958	0.191845	0.167206
MGAT5B	0.129414	-120.583	72.1158	0.0593272	0.000597057	-0.639841
MGLL	0.00305568	34748.6	4581.63	0.335529	0.00150402	0.599489
MGST1	0.000207805	39196	691.969	0.48569	5.755e-07	0.840488
MGST2	0.115352	-1024.14	1630.14	0.0700278	0.250643	-0.0758
MGST3	4.7454e-05	-5769.81	5396.25	0.558722	9.14648e-06	-0.773606
MIF	0.0148572	40.9923	20.8505	0.231834	0.0242447	0.433843
MIF4GD	0.164637	212.462	700.812	0.0370808	0.14158	0.227623
MINPP1	0.10799	560.742	769.7	0.0767218	0.136594	0.236318
MIOX	0.0779037	6930.61	621.723	0.103318	0.0737873	0.325048
MLYCD	0.000349608	3709.02	-35.3187	0.460539	0.000479827	0.648313
MMAB	0.0072531	1918.95	705.831	0.278834	0.0067025	0.523466
MOCOS	0.273073	-213.525	784.348	0.00268979	0.174863	0.187271
MOCS1	0.000318906	-4024.04	2072.73	0.466822	6.22277e-05	-0.720769
MOCS2	0.000348265	-3258.05	2512.31	0.460908	0.00192969	-0.588342
MOGAT1	0.26403	5.56235	10.2229	0.00571784	0.262607	0.0434104
MOGAT2	0.280314	-4.37684	8.12369	0.0023282	0.171772	0.194672
MOGAT3	0.0104076	3757.3	-311.488	0.255122	0.0200962	0.450787
MOGS	0.0452194	1692.93	2885.13	0.146837	0.127835	0.248356
MPI	0.0333661	2361.47	1443.11	0.171756	0.00994839	0.499388
MPO	0.105017	36.7437	7.47565	0.0788369	0.0248725	0.431391
MPPE1	0.0144626	-608.145	918.513	0.233616	0.0183589	-0.457475
MPST	8.4214e-05	11917.3	1588.65	0.530295	7.15584e-06	0.778956
MRI1	0.178292	-148.113	726.961	0.0294103	0.180386	-0.177238
MSMO1	0.00353931	2957.95	745.111	0.324591	0.000379473	0.65723
MTAP	0.0823614	-517.86	785.62	0.0992864	0.0118358	-0.488464
MTAPP1	0.248684	1.34597	1.27324	0.00998742	0.249816	0.0859759
MTAPP2	0.0116932	-66.1681	33.2648	0.246978	0.068353	-0.334635
MTHFD1	0.126706	-803.804	1596.72	0.0619063	0.118634	-0.260618
MTHFD1L	0.0444703	-1351.68	1683.9	0.148851	0.0337379	-0.405307
MTHFD1P1	0.0203768	15.4246	0.840697	0.208675	0.0107681	0.49426
MTHFD2	0.0026058	-2082.91	1463.36	0.344715	0.00277125	-0.570729
MTHFD2L	0.0106774	-323.915	408.265	0.253086	0.00784206	-0.514325
MTHFD2P1	0.00112085	-913.042	504.237	0.39261	0.00120973	-0.609744
MTHFR	0.131428	783.134	1280.2	0.057856	0.181054	0.176123
MTHFS	0.223685	-56.4184	154.54	0.0139829	0.262607	-0.0521682
MTHFSD	2.14395e-05	1353.48	443.323	0.595407	3.05145e-05	0.740833
MTM1	0.047518	352.357	414.805	0.143408	0.0211483	0.446328
MTMR1	0.255006	162.801	989.664	0.0085869	0.138906	0.232305
MTMR10	0.017051	1308.59	1436.48	0.222229	0.0136203	0.478432
MTMR11	0.273073	526.033	1858.96	0.00356125	0.231592	0.100546
MTMR12	0.00234973	-1730.2	1772.04	0.350286	0.00301304	-0.56627
MTMR14	0.112917	637.773	1261.71	0.0723203	0.0965698	0.290269
MTMR2	0.00832311	-1474.09	1730.71	0.270026	0.0248725	-0.431168
MTMR3	0.315252	62.039	1548.77	0.00122888	0.262607	-0.0503847
MTMR4	0.010135	1759.34	990.572	0.257601	0.0121439	0.486457
MTMR6	0.0701666	-654.82	1485.51	0.111476	0.0525118	-0.363171
MTMR7	0.0026058	70.4593	42.3672	0.344933	0.00369789	0.555569
MTMR8	0.273073	-4.59088	32.551	0.00321584	0.286075	-0.00468176
MTR	0.14549	2157.82	2508.77	0.0465512	0.21073	0.132873
MTRF1	0.000682694	-416.743	498.425	0.420943	0.00188897	-0.589456
MTRF1L	4.17766e-06	-720.327	547.255	0.668741	1.07916e-05	-0.769816
MTRNR2L1	0.000593327	-64.2497	34.0018	0.427976	8.66022e-05	-0.710067
MTRNR2L10	0.0700898	-56.8606	33.4369	0.111822	0.000128457	-0.6961
MTRNR2L12	0.127106	-362.165	274.485	0.0611439	0.153328	-0.214023
MTRNR2L2	0.16565	-138.63	134.235	0.036493	0.27276	-0.0102553
MTRNR2L3	0.121297	-21.3928	15.328	0.0662477	0.0684157	-0.334337
MTRNR2L4	0.0315058	-19.0494	13.0433	0.175593	0.0965698	-0.290046
MTRNR2L6.1	0.0685353	-6.70143	4.65724	0.114465	0.0349261	-0.401518
MTRNR2L8	0.171485	-114.627	125.142	0.0326576	0.262277	-0.0564041
MTRNR2L9	0.112917	-10.2143	8.69626	0.0725816	0.0425396	-0.384127
MTRR	0.139876	-755.021	1926.82	0.0518181	0.22569	-0.106343
MVD	0.00301062	2016.17	858.878	0.336547	0.00140117	0.603056
MVK	0.00026151	23993	-2513.86	0.476001	6.70598e-05	0.718539
NADK	0.00011809	4589.82	1154.26	0.514993	0.000158874	0.689111
NADK2	0.259153	-258.77	1222.18	0.00672636	0.261502	-0.0577417
NADK2_AS1	0.196552	19.8112	12.8546	0.0242089	0.207398	0.14402
NADSYN1	0.00082995	4729.1	1728.29	0.40999	0.00144128	0.601495
NAGA	0.00864109	2457.62	1390.23	0.267819	0.00556648	0.534167
NAGK	0.18701	1208.56	2631.07	0.0264531	0.154275	0.213355
NAGLU	0.0196759	-1286.99	2289.63	0.211731	0.0046951	-0.543753
NAGS	0.0668648	-375.449	287.685	0.116303	0.182621	-0.174563
NAMPT	0.261724	-5924.95	14210.4	0.00608422	0.262607	0.0287594
NAMPTL	0.0218607	-269.472	139.638	0.20307	0.0192126	-0.454131
NANP	0.114243	-115.331	202.043	0.0706552	0.0930635	-0.294951
NANS	0.169171	-314.923	985.834	0.0342849	0.172901	-0.192621
NAPRT1	0.022873	1798.62	1007.65	0.199165	0.0346555	0.402632
NAT1	0.0857622	-154.448	209.306	0.0961235	0.0479342	-0.372757
NAT10	0.0064797	-1633.08	2491.93	0.286369	0.0152699	-0.470629
NAT14	0.206536	683.312	1062.61	0.0199178	0.250643	0.0729017
NAT16	0.216646	-34.2675	26.7546	0.0160182	0.250643	-0.068785
NAT2	0.206536	-3.30193	4.33605	0.0203169	0.140493	-0.230625
NAT8	0.0779037	-9709.09	6304.49	0.103335	0.231592	-0.0998776
NAT8L	0.232418	7.12069	14.1863	0.0116208	0.222508	0.117267
NDST1	0.221373	-966.57	4285.33	0.0146314	0.205625	-0.150262
NDST2	0.212296	16.778	20.4308	0.0178919	0.199205	0.157396
NDST3	0.000318906	-71.9537	36.4627	0.466635	0.000605239	-0.639172
NDUFA1	0.0586249	-1858.35	3580.56	0.125887	0.0525168	-0.362948
NDUFA10	0.0476686	-1267.79	3416.25	0.143118	0.049234	-0.370082
NDUFA11	0.0545781	512.823	511.63	0.130926	0.067456	0.336864
NDUFA12	0.0410842	-1452.23	2155.81	0.155663	0.0382686	-0.393714
NDUFA13	0.0872393	66.8631	46.0621	0.0941919	0.11489	0.264185
NDUFA2	0.371485	-36.6906	1281.21	0.000174955	0.262607	-0.0292053
NDUFA3	0.0288135	2239.11	1333.24	0.18189	0.00858992	0.508306
NDUFA3P1	0.273073	-0.928858	3.94198	0.00284081	0.499932	0.000780381
NDUFA3P2	0.224886	3.11097	2.7142	0.0134184	0.250643	0.0740825
NDUFA3P4	0.255006	1.58833	1.74608	0.00790121	0.261502	0.0574826
NDUFA4	0.019968	-6723.01	6569.34	0.210192	0.00795287	-0.512987
NDUFA4L2	0.0432355	172511	23012.8	0.150885	0.0127533	0.483336
NDUFA5	0.000186307	-6899.8	5997.1	0.491243	0.000587486	-0.64051
NDUFA5P11	0.524125	0.0691059	2.23662	2.6003e-05	0.250643	-0.0813317
NDUFA6	0.0565604	-3439.66	3883.98	0.128155	0.0232453	-0.436965
NDUFA6_AS1	0.132015	105.669	165.137	0.0575481	0.171993	0.194405
NDUFA7.1	0.098473	14.7151	13.576	0.0842427	0.150434	0.217145
NDUFA8	1.35587e-05	-2025.24	1876.7	0.614435	2.70797e-06	-0.80504
NDUFA9	0.0268235	584.501	332.449	0.18687	0.00550361	0.534836
NDUFA9P1	0.212296	-16.1001	32.2412	0.0179742	0.168221	-0.198641
NDUFAB1	0.00492762	3621.22	1493.88	0.304145	2.75415e-05	0.743954
NDUFB1	0.0379334	-584.162	1552.03	0.162335	0.0285504	-0.419575
NDUFB10	0.0143886	7572.79	3767.55	0.233999	0.0033377	0.56092
NDUFB11	0.0416322	-1746.54	3094.02	0.154099	0.0748094	-0.323042
NDUFB1P1	0.0124069	-6.85292	3.92024	0.243344	0.0113779	-0.491067
NDUFB1P2	0.113006	9.61793	5.08302	0.0718919	0.0937906	0.293836
NDUFB2	0.0338859	-1101.7	1867.61	0.170637	0.0213075	-0.445436
NDUFB2_AS1	0.255006	-7.89608	20.8584	0.00863328	0.262607	-0.0254153
NDUFB3	0.214242	-503.766	1798.73	0.0168666	0.174863	-0.188385
NDUFB4	0.316897	-228.483	4029.8	0.00072454	0.262607	0.0196188
NDUFB4P2	0.00990085	-14.9728	7.21352	0.25908	0.202957	-0.153226
NDUFB5	0.000105984	-4448.12	3704.03	0.521549	9.59358e-05	-0.7065
NDUFB6	4.18628e-06	-1968.69	1530.36	0.664274	1.07916e-05	-0.770039
NDUFB7	0.129414	1942.7	3772.31	0.0592628	0.11869	0.260172
NDUFB8	0.00380509	-454.453	491.427	0.32013	0.00140684	-0.602833
NDUFB8P2	0.256037	-4.27514	10.7967	0.00700655	0.262607	0.0238547
NDUFB9	0.0175962	5614.35	2654.9	0.220055	0.0132614	0.480438
NDUFC1	0.269737	396.844	2776.03	0.0052771	0.232509	0.0976482
NDUFC2	0.00437123	-334.734	461.192	0.311567	0.000920206	-0.62156
NDUFS1	0.122515	-3032.33	4223.8	0.0651237	0.0577658	-0.353362
NDUFS2	0.147694	-705.764	3745.82	0.0455559	0.176883	-0.184595
NDUFS3	0.000397407	-2770.19	2994.62	0.453956	0.000597057	-0.639841
NDUFS4	0.00313909	-3870.74	2680.23	0.33308	0.0198636	-0.451902
NDUFS5	0.315252	-781.105	6158.85	0.00118716	0.220271	0.121726
NDUFS5P3	0.13668	-2.65565	1.79541	0.0542521	0.134206	-0.241137
NDUFS5P5	0.0655457	5.93196	0.0401615	0.117852	0.0924037	0.296276
NDUFS6	0.0593446	-2151.35	3691.76	0.125041	0.0621279	-0.346005
NDUFS7	0.316897	68.652	1232.68	0.000960169	0.262607	0.0358935
NDUFS8	0.259153	-773.845	3378.36	0.00661494	0.262607	0.0494929
NDUFV1	0.273073	-324.378	6756.83	0.00288786	0.286075	-0.00512764
NDUFV2	0.152434	39.9423	28.7205	0.0427336	0.176883	0.183926
NDUFV2P1	0.00179759	-62.6821	34.8123	0.365917	0.000242181	-0.674397
NDUFV3	0.00214167	-935.02	1860.09	0.356102	0.000499345	-0.646529
NEU1.1	0.273073	-466.688	3962.38	0.00353236	0.250643	-0.0827111
NEU3	0.255006	67.8882	155.613	0.00797618	0.167407	0.200201
NEU4	0.10799	-25.1831	23.474	0.076791	0.193361	-0.165422
NFS1	0.0490863	326.152	738.205	0.140994	0.0396708	0.39037
NIT2	0.000429595	6995.39	1509.83	0.448343	0.000232419	0.675957
NME1	0.219293	-447.541	1177.3	0.0150158	0.261208	-0.0584106
NME1_NME2	0.170747	-30.859	67.1689	0.0333625	0.168421	-0.197749
NME2P1	0.311024	2.77082	31.7874	0.0013113	0.262607	0.0463717
NME3	0.000139878	15373.3	1242.85	0.506895	1.69172e-05	0.757331
NME4	0.00221889	15557.5	2177.56	0.353895	2.8906e-05	0.742617
NME6	0.0330028	118.51	336.732	0.172398	0.0126865	0.483782
NME7	0.162897	-249.28	513.626	0.038277	0.144491	-0.222495
NMNAT1	0.000186147	412.095	266.753	0.492312	3.53946e-05	0.73682
NMNAT1P3	0.00933677	17.7177	-0.480556	0.262414	0.0330637	0.407767
NMNAT2	0.0831075	88.3138	34.0983	0.0985281	0.0985669	0.286256
NMNAT3	0.0305715	330.486	187.218	0.178076	0.0139385	0.476871
NMRK1	0.0188436	-1598.32	1488.92	0.215306	0.104462	-0.277562
NMRK2	0.16565	-2.00342	1.58888	0.036387	0.221416	-0.118874
NNMT	0.0214593	88547.5	28199.8	0.204775	0.00827656	0.510758
NNT	0.000953718	-2536.36	2068.22	0.402118	0.00577998	-0.53216
NNT_AS1	0.000158469	-2679.05	1440.23	0.50035	0.0117615	-0.489133
NOS1	0.00552988	-37.0424	18.2172	0.29662	0.00263047	-0.573188
NOS1AP	0.0444703	-168.675	94.7476	0.148707	0.000139147	-0.693347
NOS2	0.000199751	-301.986	144.738	0.487699	0.000133202	-0.694907
NOS2P3	0.0397251	47.0523	-6.03098	0.158433	0.0503308	0.367073
NOS3	0.0280676	-689.377	639.969	0.18356	0.0621279	-0.34489
NPL	0.0630777	5762.1	582.829	0.120669	7.93261e-05	0.712743
NPLOC4	0.000112763	8072.14	3311.72	0.517875	2.14482e-05	0.75042
NPR1	0.103946	-2524.67	2614.51	0.0798074	0.144491	-0.223387
NPR2	0.0975282	263.906	224.741	0.0853473	0.191845	0.167429
NQO1	0.340799	114.256	1421.9	0.000351481	0.209912	0.137332
NSD1	0.126807	-539.855	2819.07	0.0618038	0.0988777	-0.285588
NSDHL	0.0797119	-339.333	724.796	0.101438	0.0850553	-0.306544
NT5C	0.196385	-453.939	2035.92	0.0242863	0.205961	-0.148256
NT5C1B	0.273073	-2.18911	4.36191	0.00458923	0.207398	-0.143448
NT5C2	0.144028	525.055	667.75	0.0476456	0.0922883	0.296735
NT5C3A	4.50611e-05	-2845.32	2270.71	0.563199	4.32043e-05	-0.731024
NT5C3AP1	1.07282e-05	-62.8009	32.0974	0.624392	4.4262e-06	-0.790326
NT5C3B	0.00351921	-4741.37	3317.91	0.325207	0.000122928	-0.697583
NT5CP1	0.0925313	4.5563	1.73728	0.0891809	0.0825416	0.310249
NT5CP2	0.126807	3.07502	0.340909	0.0617827	0.0709573	0.330491
NT5DC4	0.174573	9.08793	5.15453	0.0310236	0.137341	0.23456
NT5E	0.00576491	-8784.79	4300.55	0.293894	0.000102507	-0.703825
NT5M	0.0610504	-279.71	228.615	0.12284	0.00644174	-0.525695
NTPCR	0.255006	-271.694	1870.37	0.00855065	0.250643	-0.07201
NUDT12	0.000156598	-1713.82	1043.46	0.501366	3.87234e-05	-0.734145
NUDT13	0.102025	140.902	204.931	0.0815992	0.164274	0.203768
NUDT16	0.174573	-807.943	3022.81	0.0318081	0.209912	-0.136217
NUDT16L1	0.00134107	3821.74	393.885	0.382393	4.13709e-06	0.792779
NUDT16P1	0.292982	-33.9464	427.27	0.00187255	0.249816	-0.0860553
NUDT2	0.00204232	-602.824	578.831	0.35928	0.0144695	-0.474196
NUDT21	0.0103808	-3176.49	3063.22	0.255429	0.018051	-0.45859
NUDT22	0.0165211	940.199	732.152	0.224159	0.00364748	0.556461
NUDT5	6.45809e-05	3453.17	853.548	0.543843	6.17318e-06	0.782523
NUDT9	8.11281e-05	-1388.75	1480.07	0.532227	0.000138882	-0.69357
NUS1	0.00132018	-1895.66	1840.37	0.383523	0.00133173	-0.605731
NUS1P1	0.296202	2.65411	17.7699	0.0015973	0.297918	-0.00334412
NUS1P2	0.00697858	1463.9	-54.1227	0.281804	0.0458683	0.377216
NUS1P3	0.142212	2.21448	0.646668	0.0494197	0.211487	0.130838
OAT	0.138863	-1081.93	2209.9	0.05254	0.0773215	-0.319252
OCRL	0.0555299	352.314	987.814	0.12957	0.0278874	0.421582
ODC1	0.0906923	-2598.1	4399.64	0.0913172	0.136465	-0.23654
OGDH	0.000319809	-10069	8499.21	0.465854	7.02923e-05	-0.716756
OGDHL	0.0979627	962.86	361.327	0.0845548	0.029856	0.416454
OGT	0.10806	7557.31	4336.35	0.0764219	0.250643	0.071787
OLAH	0.164992	-12.9091	10.3568	0.0368094	0.0737873	-0.325416
OPLAH	3.14e-06	6049.4	238.757	0.687202	4.4262e-06	0.790549
OSTC	0.0508808	3091.26	2868.93	0.137384	0.00787415	0.513879
OSTCP1	0.529007	0.0468425	1.38459	1.50614e-05	0.220271	0.122304
OSTCP5	0.036709	6.90627	0.0119917	0.164909	0.0742736	0.323934
OSTCP8	0.4096	-0.218193	3.89431	5.42535e-05	0.231592	0.0994303
OXCT1	0.0010517	-1029.14	735.802	0.396333	0.00205634	-0.584997
OXCT1_AS1	0.00322247	-28.0532	12.3381	0.331459	0.0214001	-0.444481
OXCT2	0.0238534	21.4895	5.70901	0.195578	0.0167541	0.464386
OXCT2P1	0.106579	-7.05933	6.04612	0.0779569	0.118634	-0.260753
OXSM	0.16337	83.1308	271.471	0.0376631	0.141195	0.228738
P4HA1	0.0256321	7839.16	2572.82	0.19008	0.0088246	0.506076
P4HA2	0.0533987	4643.49	2541.73	0.133279	0.0128657	0.482445
P4HA2_AS1	0.129414	12.2684	4.17692	0.0594745	0.0866277	0.30476
P4HA3	0.0927796	1379.43	592.399	0.0887679	0.0519974	0.364286
PAFAH1B1	9.71062e-05	-4385.08	4613.4	0.525149	0.000253061	-0.672836
PAFAH1B2	0.221928	467.017	3123.68	0.0143971	0.225506	0.112808
PAFAH1B3	0.340799	-70.4242	698.294	0.000381382	0.197778	0.161632
PAFAH2	0.00190285	1748.24	679.872	0.363127	0.0186402	0.45636
PAH	0.126807	-504.604	290.066	0.0615008	0.0989951	-0.285365
PAICS	0.385457	-69.3694	3658.39	7.83763e-05	0.27276	-0.00713411
PAICSP1	0.132015	-7.51771	8.96391	0.0574972	0.158967	-0.208227
PAICSP4	0.149586	-2.77845	3.21081	0.0440989	0.13617	-0.23757
PANK1	0.140963	620.494	228.384	0.0506271	0.137128	0.23498
PANK2	0.027029	-1130.41	1442.1	0.186148	0.0737873	-0.325717
PANK3	0.0188436	-1180.6	2000.02	0.215308	0.0165225	-0.465501
PAPSS1	0.171174	-560.817	1779.77	0.0328457	0.168221	-0.198641
PAPSS2	0.273073	364.601	2516.59	0.0026283	0.205978	0.14781
PC	2.81393e-05	14179.4	-1304.88	0.583469	0.000108541	0.702041
PCA3	0.161081	-73.6676	87.1632	0.0393087	0.234149	-0.0958647
PCAT1	0.0170976	65.6415	24.6067	0.221917	0.0252174	0.430053
PCAT2	0.0309644	9.37591	0.645986	0.177139	0.0305728	0.414702
PCAT6	0.000586912	1466.99	-146.183	0.429203	0.000220533	0.677741
PCAT7	0.197138	35.2648	37.0658	0.0239666	0.173382	0.190838
PCBD1	0.186675	1528.47	3298.79	0.0267342	0.167407	0.201093
PCBD2	0.229194	-154.964	675.168	0.0120858	0.121209	-0.255713
PCBP1	0.00554777	-5980.06	6385.38	0.296371	0.00137061	-0.604393
PCBP1_AS1	0.00391369	3050.09	611.844	0.318241	0.00747878	0.517223
PCBP2	0.0106774	-6230.62	10060.9	0.253508	0.00864909	-0.507414
PCBP2P1	0.868205	0.0155461	2.13443	7.35175e-07	0.262607	0.0394969
PCBP3	0.00223028	751.213	-70.2822	0.353233	8.3994e-07	0.831124
PCBP4	0.167782	246.753	447.761	0.0354227	0.16179	0.206443
PCCA	1.06899e-05	-3790.47	2310.66	0.626376	2.76791e-06	-0.80348
PCCA_AS1	0.273073	3.38796	8.66312	0.00287411	0.27276	-0.00713411
PCCB	0.0226632	-1080.33	1366.67	0.200394	0.0797985	-0.315462
PCDH1	0.00417193	10389.4	-238.66	0.314111	0.00113553	0.612419
PCDH10	0.0184681	-5368.23	2637.55	0.216914	5.56206e-05	-0.723941
PCDH11X	0.069357	22.8121	-2.31617	0.113107	0.000263533	0.671448
PCDH11Y	0.118382	10.1882	1.87876	0.0684992	0.22569	0.107878
PCDH12	0.00100002	-4323.56	2165.04	0.39951	0.08054	-0.313901
PCDH15	0.206536	-91.8611	59.392	0.0203429	0.213835	-0.129619
PCDH17	1.26721e-05	-6305.56	3494.1	0.618542	1.11138e-05	-0.768701
PCDH18	0.000720739	-693.796	342.634	0.417858	0.00630084	-0.527033
PCDH19	5.82042e-06	-77.6307	33.7004	0.648408	1.44043e-07	-0.864566
PCDH20	0.00101578	-272.47	118.869	0.398147	2.0022e-05	-0.752595
PCDH7	0.0254538	-528.631	263	0.190707	0.000118827	-0.698697
PCDH9	0.000402123	-239.045	100.421	0.452499	0.00231196	-0.579265
PCDHA1	0.041433	-16.8593	9.98201	0.154961	0.00955147	-0.501983
PCDHA10	0.000556091	-190.146	73.4538	0.433047	0.010573	-0.495344
PCDHA11	0.0328782	-14.3746	7.01726	0.172673	0.0348408	-0.401889
PCDHA12	0.0154717	-12.7509	6.81233	0.228919	0.000225772	-0.676843
PCDHA13	0.000593327	-11.8981	5.39849	0.428449	0.000792449	-0.629089
PCDHA2	0.11154	-46.167	28.945	0.0734917	0.0468854	-0.37493
PCDHA3	0.0194811	-49.3245	25.874	0.212616	0.000328007	-0.662719
PCDHA4	0.103175	-149.902	88.5077	0.0805807	0.00316258	-0.563595
PCDHA5	0.0881855	-69.0576	40.138	0.0932335	0.00119678	-0.610435
PCDHA6	0.0613421	-17.0266	11.3942	0.122373	0.0248725	-0.431314
PCDHA7	0.00225936	-46.4498	22.5482	0.352447	0.000138882	-0.693561
PCDHA8	0.000817189	-9.99087	4.13676	0.411013	0.000321802	-0.663602
PCDHA9	0.000401502	-22.572	9.88534	0.452772	0.00101719	-0.617146
PCDHAC1	0.00252814	-31.0433	15.8242	0.346528	0.000124096	-0.697224
PCDHAC2	0.00079288	-92.6116	47.917	0.413197	0.000116944	-0.699366
PCDHB10	4.18628e-06	-1067.17	504.828	0.666745	5.755e-07	-0.841157
PCDHB11	0.00118048	-151.881	68.5806	0.389738	0.0139385	-0.476871
PCDHB12	0.00012373	-327.487	144.531	0.512767	0.00220346	-0.581653
PCDHB13	0.00992559	-696.907	365.183	0.258709	0.000659342	-0.636051
PCDHB14	0.00173052	-958.978	516.438	0.368422	4.29309e-05	-0.73147
PCDHB15	0.000306931	-1046.15	438.505	0.468751	0.0738574	-0.324825
PCDHB16	4.7454e-05	-1837.8	858.955	0.559727	2.95461e-06	-0.800581
PCDHB17	0.279894	-7.06802	25.9028	0.00235822	0.261208	0.0588564
PCDHB18	0.00924915	-41.4616	26.2814	0.263238	0.0201098	-0.450564
PCDHB19P	0.0870322	-10.7989	9.8194	0.0945408	0.0813896	-0.312118
PCDHB2	0.000875453	-1330.81	623.098	0.407448	6.91687e-05	-0.717424
PCDHB3	2.14395e-05	-380.389	159.556	0.594971	1.80196e-05	-0.755324
PCDHB4	0.00589777	-1321.77	561.697	0.292438	1.65486e-05	-0.758
PCDHB5	0.00050942	-159.518	83.3569	0.438191	0.000184072	-0.684429
PCDHB6	0.121948	949.892	174.382	0.065528	0.101577	0.281798
PCDHB7	0.0737026	-575.661	272.185	0.107445	0.0924869	-0.296066
PCDHB8	0.0049047	-277.303	137.106	0.304657	0.00040954	-0.654555
PCDHB9	4.18628e-06	-1023.6	507.355	0.663371	3.00518e-06	-0.800136
PCDHGA1	7.65735e-05	-745.832	294.055	0.535826	3.70606e-08	-0.89065
PCDHGA10	0.0479092	-66.0649	53.2809	0.142783	0.0860183	-0.305429
PCDHGA11	0.00137102	-816.092	326.8	0.380784	0.0101867	-0.49805
PCDHGA12	0.0906923	-258.875	141.771	0.0912381	0.0808276	-0.313009
PCDHGA2	3.74795e-05	-229.322	93.4514	0.571081	4.29847e-06	-0.791347
PCDHGA3	0.00017367	-132.986	54.3966	0.495977	0.00163453	-0.595911
PCDHGA4	0.00803168	83.0673	-1.43448	0.272922	0.0212105	0.445882
PCDHGA5	0.0520065	101.102	13.7172	0.135374	0.0491503	0.370305
PCDHGA6	0.152417	94.5896	41.8476	0.0428594	0.198396	0.158957
PCDHGA7	0.0838024	63.8373	13.9351	0.0978618	0.143992	0.22517
PCDHGA8	0.109866	15.1777	5.72864	0.0748013	0.115262	0.263739
PCDHGA9	0.0741531	-56.964	44.8902	0.107071	0.198396	-0.159849
PCDHGB1	0.0218623	223.842	-18.6882	0.202812	0.0140101	0.476425
PCDHGB2	0.0158949	539.799	-2.17853	0.226354	0.00265013	0.572736
PCDHGB3	0.019598	105.8	1.05011	0.212104	0.0346324	0.402855
PCDHGB4	0.162897	-84.1637	70.0697	0.0380529	0.207398	-0.141791
PCDHGB6	0.16565	-38.8462	55.9953	0.0363994	0.206412	-0.146472
PCDHGB7	0.0322237	-1308.31	977.769	0.174112	0.0289849	-0.41846
PCDHGB8P	0.0700557	-54.9283	39.3238	0.11223	0.262607	-0.0465947
PCDHGC3	0.00335469	-1022.01	869.491	0.328815	0.00176291	-0.592577
PCDHGC4	0.118952	24.7904	7.51525	0.0679921	0.172901	0.192398
PCDHGC5	0.340799	1.97957	18.0682	0.00038961	0.21073	-0.133542
PCDP1	0.0823614	639.772	371.058	0.0992749	0.111484	0.269536
PCED1A	0.105335	1633.58	2107.14	0.0786286	0.13617	0.237655
PCED1B	0.221373	205.607	397.774	0.0147456	0.256717	0.0626464
PCED1B_AS1	0.0419153	797.633	289.908	0.153363	0.0267229	0.425595
PCF11	0.0700856	861.479	1136.15	0.112113	0.0727246	0.3275
PCGEM1	0.0688532	-34.5853	17.8656	0.11386	0.192713	-0.165868
PCGF1	0.127106	271.848	842.85	0.061148	0.101653	0.281352
PCGF2	0.0032921	-1882.41	2162.51	0.33008	0.00023857	-0.675066
PCGF3	0.0398471	-2788.41	2833.71	0.15771	0.080611	-0.313455
PCGF5	0.144028	1439.52	2118.6	0.0479023	0.191845	0.168321
PCGF6	0.0216291	-342.001	402.103	0.20378	0.0128321	-0.482667
PCGF7P.1	0.136409	-2.80613	2.08864	0.0546394	0.0628864	-0.343283
PCID2	8.18516e-05	-2180.97	1785.38	0.531698	3.86256e-06	-0.794562
PCIF1	0.0414761	1378.95	1348	0.154372	0.00788317	0.513656
PCK1	0.296202	-1266.6	1653.32	0.00157756	0.0829799	0.309665
PCK2	0.316897	138.015	1364.03	0.000809793	0.124515	0.251923
PCLO	0.0665925	-777	869.684	0.116736	0.0980967	-0.287371
PCM1	0.0301437	-2825.68	3426.18	0.179255	0.00443904	-0.546652
PCMT1	0.00502274	-2214.27	2128.58	0.302864	0.00612437	-0.528816
PCMTD1	0.000700017	3875.7	740.582	0.419681	0.000490135	0.647421
PCMTD2	0.224805	-601.574	2435.12	0.0134952	0.250643	-0.0784753
PCNA	0.132677	-2122.35	2567.22	0.0568019	0.067456	-0.336864
PCNP	0.242576	-670.799	3875.75	0.0105307	0.221116	-0.119942
PCNPP1	0.142726	13.1849	11.3078	0.0491938	0.167011	0.201762
PCNPP5	0.175644	-3.2513	5.88839	0.0303803	0.217427	-0.126408
PCNT	0.0673737	656.145	1114.14	0.115696	0.0538051	0.360719
PCNX	0.216646	-327.577	1400.56	0.0157179	0.158416	-0.208673
PCNXL2	0.0550564	496.539	562.564	0.130216	0.0455389	0.378331
PCNXL3	0.00225604	3221.33	1682.46	0.352621	0.0363558	0.39795
PCNXL4	0.259312	-128.845	1331.71	0.00643539	0.231592	-0.0987629
PCOLCE	0.000388665	-4610.5	2540.78	0.455114	6.01262e-05	-0.72166
PCOLCE_AS1	0.118382	-13.0232	12.3439	0.0685541	0.22569	-0.110133
PCOLCE2	0.331339	183.072	2012.71	0.000477663	0.262607	-0.0499388
PCP2	0.0368902	133.894	7.93574	0.164576	0.01997	0.451233
PCP4	0.650156	0.117495	16.3037	1.65456e-06	0.222508	0.116598
PCP4L1	0.041433	13.4514	2.68757	0.15499	0.0211967	0.446043
PCSK1	0.0309644	120.391	28.6367	0.176928	0.0554649	0.358266
PCSK1N	0.00296982	7639.19	-676.921	0.337657	0.000415416	0.653886
PCSK4	0.00044411	939.127	212.796	0.445864	0.000289751	0.667931
PCSK5	0.0418267	-2589.94	1480.82	0.15362	0.000162741	-0.688219
PCSK6	0.0688001	-2220.35	2890.4	0.114092	0.0804497	-0.31457
PCSK7	0.100237	1816.86	2264.22	0.0827701	0.114766	0.264631
PCSK9	0.190897	-14.0048	8.91703	0.0255715	0.207398	-0.141298
PCTP	0.000331914	1615.25	507.836	0.463972	7.88869e-06	0.77695
PCYOX1	0.00509508	-5348.13	4812.57	0.301904	0.00187447	-0.589902
PCYOX1L	0.0498094	-707.759	658.068	0.139537	0.00546882	-0.535282
PCYT1A	0.0039373	1196.33	2080.39	0.317705	0.00487377	0.541524
PCYT1B	0.25559	-4.86227	10.1343	0.00742966	0.262607	-0.0260841
PCYT2	0.215758	-802.551	1614.51	0.0166798	0.22569	-0.111916
PDE10A	0.385457	142.217	2465.07	8.09724e-05	0.262607	-0.026307
PDE11A	0.000593327	1098.77	165.722	0.428503	8.86114e-05	0.708953
PDE1A	0.00105373	-856.043	428.949	0.396088	0.00342302	-0.559582
PDE1B	0.169171	-254.193	410.893	0.0342892	0.207398	-0.142236
PDE1C	0.345832	27.9054	248.439	0.000316118	0.262607	0.0457029
PDE2A	0.0194811	-1624.7	855.412	0.212665	0.0929812	-0.295397
PDE3A	0.00343826	-2290.46	1199.06	0.326979	0.0722063	-0.328615
PDE3B	0.118952	290.805	135.935	0.0680353	0.0535412	0.361388
PDE4A	0.123658	-513.04	1435.67	0.0638264	0.148745	-0.219151
PDE4B	0.0505243	1652.8	367.827	0.138577	0.0021088	0.583883
PDE4C	0.311024	16.8729	89.0607	0.00135842	0.243494	0.0902911
PDE4D	0.0106774	-2310.14	1831.6	0.253461	0.0153723	-0.470183
PDE4DIP	7.7209e-05	12291.9	2882.5	0.534669	2.8906e-05	0.742617
PDE5A	0.000528987	-1926.06	1084.76	0.435731	0.000647293	-0.63672
PDE6A	0.371485	-0.564991	9.46831	0.000208383	0.262607	-0.0350018
PDE6B	0.0622307	1399.4	538.529	0.1215	0.0723098	0.328392
PDE6C	0.196552	24.8858	31.6903	0.0241592	0.220271	0.122841
PDE6D	0.112005	-209.609	697.648	0.0732344	0.0559152	-0.357152
PDE6G	0.216277	19.9931	27.9464	0.016513	0.262607	0.0222941
PDE7A	0.164992	1975.08	1864.67	0.0367772	0.146652	0.220489
PDE7B	0.00281488	-758.055	369.104	0.340473	0.0611725	-0.348457
PDE8A	0.315252	-175.826	1722.93	0.00123951	0.226132	-0.102999
PDE8B	0.00214239	-765.111	479.511	0.355715	0.0117726	-0.48891
PDE9A	0.385457	30.258	783.332	0.000109283	0.216757	-0.128191
PDHA1	0.00389097	-2236.07	2994.2	0.31891	0.00207633	-0.584552
PDHB	0.000125094	-1327.96	1271.85	0.511808	8.7331e-05	-0.709399
PDSS1	0.0072563	-339.127	302.435	0.278719	0.000745984	-0.631592
PDSS2	0.00111976	-589.432	749.299	0.392771	0.000864693	-0.624904
PDXK	4.48372e-06	17799.9	2530.85	0.656966	1.30406e-06	0.822653
PDXP	0.0035098	638.718	8.76557	0.325533	2.86872e-06	0.801696
PEMT	0.00638435	-495.953	610.432	0.287357	0.00779605	-0.514771
PFAS	0.011545	-1179.68	1219.29	0.247875	0.00220346	-0.581653
PFKFB1	1.35587e-05	56.9886	-2.36292	0.614707	8.40984e-07	0.830771
PFKFB2	0.0197501	1124.96	333.636	0.211265	0.00471695	0.543307
PFKFB3	0.00277051	23946	1284.41	0.341394	0.000139882	0.693124
PFKFB4	7.4688e-05	6683	-290.214	0.53784	0.000467518	0.649427
PFKL	0.0224576	12480.6	10179.5	0.201031	0.0186536	0.456137
PFKM	0.140448	-681.54	1872.02	0.0510636	0.0906163	-0.299187
PFKP	0.0196759	22942.2	11154.5	0.211585	0.0123694	0.485343
PGAM1	0.011848	5591.01	2875.24	0.246152	0.00142972	0.601941
PGAM1P11	0.0228606	10.7127	-0.333614	0.199298	0.11913	0.25777
PGAM1P5	0.193034	-4.87851	6.04211	0.025069	0.179262	-0.182163
PGAM1P6	0.148811	4.25788	1.84916	0.0447634	0.243886	0.0881009
PGAM1P7	0.156641	-4.55237	4.85338	0.0412491	0.143692	-0.225494
PGAM4	0.0533953	10.3542	6.50726	0.133569	0.0440982	0.381006
PGAM4P1	0.0555299	-7.0383	3.4451	0.129628	0.1225	-0.254242
PGAP1	0.000593327	-1248.44	848.772	0.428339	0.0088246	-0.506076
PGAP2	0.126807	416.67	644.728	0.0614883	0.219706	0.124847
PGAP3	0.171174	754.819	1177.86	0.0331067	0.144599	0.222272
PGD	0.255504	-1693.05	3576.56	0.00747876	0.250643	-0.0786982
PGDP1	0.127106	-1.84401	1.34345	0.0610247	0.127321	-0.249238
PGK1	0.0209603	46796.4	14183.4	0.206478	0.00674338	0.52302
PGK1P2	4.7954e-05	64.7182	-0.388322	0.557605	1.47937e-05	0.76179
PGK2	0.272949	-1.09727	1.86096	0.00501988	0.250643	-0.0820922
PGLS	0.0630777	1848.6	2131.68	0.120564	0.0311012	0.412664
PGM1	0.000130139	12236.9	943.115	0.509986	2.71994e-06	0.804148
PGM2	0.0422199	-500.967	899.663	0.15266	0.0559152	-0.357152
PGM2L1	0.00467518	-1729.45	1240.78	0.307471	0.0906163	-0.29941
PGM3	0.00494124	-1326.36	1487.24	0.303918	0.00479704	-0.542416
PGP	0.00124833	1702.43	500.825	0.386343	0.000865986	0.624458
PGPEP1	0.00411583	11287.7	1288.53	0.314932	0.00348825	0.558467
PGPEP1L	0.206536	3.65049	2.60541	0.0206867	0.156947	0.210996
PGS1	0.00210131	1991.38	848.615	0.357485	1.6461e-05	0.758223
PHGDH	0.273073	-371.356	1020.56	0.00386361	0.262607	-0.0147141
PHOSPHO1	0.0925313	155.607	55.2967	0.0897083	0.0178655	0.459705
PHOSPHO2	0.0128124	-87.7817	87.9006	0.241131	0.00672292	-0.523243
PHYKPL	0.0674167	6385.44	3109.42	0.11551	0.0878041	0.302754
PI4K2A	0.00701752	1513.24	454.657	0.28135	5.49064e-05	0.724336
PI4K2B	0.385457	-14.0297	962.154	0.000111896	0.297918	-0.00379
PI4KA	0.00806408	2128.35	2012.82	0.272412	0.00134259	0.605285
PI4KAP1	0.0106508	-777.358	674.948	0.253721	0.02137	-0.44499
PI4KAP2	0.000574192	1021.66	84.6034	0.431311	0.000524927	0.644746
PI4KB	0.168103	528.854	2664.47	0.0349338	0.167407	0.200201
PIGA	0.0498094	402.991	310.574	0.139505	0.0205331	0.448557
PIGB	0.0588471	152.989	342.623	0.125619	0.0545005	0.359604
PIGC	0.00924915	-765.2	1193.58	0.263193	0.0099207	-0.499611
PIGCP1	0.039552	245.075	99.8473	0.158818	0.056014	0.35626
PIGF	0.0871166	91.5848	163.272	0.0943333	0.0825416	0.310557
PIGFP1	0.00436595	8.7092	0.119347	0.311722	0.00312936	0.564183
[truncated: 568 more rows]

## Sheet: SNRlactate
	Pearson correlations				Spearman Correlations
Gene name	Corrected p-value	Slope	Intercept	r2	corrected_spearman_P	spearman_coef
A3GALT2	0.00170542	1.40257	-2.04381	0.430012	0.00143314	0.679372
A4GALT	0.0323873	-174.688	4679.67	0.223248	0.18321	-0.242256
AACS	0.201324	26.7938	659.414	0.0671882	0.164266	0.268331
AACSP1	0.0692	-14.2459	232.726	0.162296	0.064022	-0.404057
AADAT	0.543801	0.827841	215.37	0.00115335	0.412506	0.00512593
AANAT	0.103796	1.36588	12.3694	0.12555	0.148299	0.289281
AASDHPPT	0.561807	-1.45434	963.027	0.000489128	0.320674	0.038333
AASS	0.186644	-22.5318	676.29	0.0745911	0.105528	-0.342323
ABAT	0.33263	37.8032	620.512	0.0218083	0.278508	-0.106084
ABHD14A_ACY1	0.391942	0.380264	5.99474	0.0110242	0.318149	-0.0548862
ABHD16A	0.398473	0.830549	42.8159	0.00945179	0.214563	0.193002
ABO	0.00215087	-24.8809	255.465	0.416009	0.0231118	-0.496992
ACAA1	0.484444	6.47414	1330.74	0.00349626	0.294351	-0.071763
ACAA2	0.246666	-111.356	3408.25	0.0469098	0.168109	-0.263874
ACACA	0.00213747	94.8559	663.033	0.417133	0.00208579	0.658793
ACACB	0.157194	-69.9465	2112.87	0.0894496	0.0822962	-0.376644
ACAD8	0.24603	-11.2659	1020.73	0.0476024	0.104109	-0.345443
ACADL	0.0127582	-240.586	3043.23	0.295505	0.0279022	-0.481169
ACADM	0.402431	26.7273	1511.01	0.00868447	0.241981	-0.150658
ACADS	0.0113985	105.638	1111.55	0.304743	0.000926943	0.713173
ACADSB	0.486083	-6.90797	1127.24	0.00332452	0.237608	-0.16091
ACADVL	0.291736	229.305	13200.1	0.0335099	0.396198	0.00579453
ACAT1	0.461264	24.0483	2330.97	0.00421686	0.346227	0.0189436
ACAT2	0.173359	9.80741	177.991	0.0799271	0.15243	0.28304
ACER1	0.726719	-0.00286826	1.95407	2.62244e-05	0.346227	0.0195113
ACER2	0.00514486	-6.3084	92.4294	0.359775	0.00472962	-0.606197
ACER3	0.442526	-8.36179	1792.3	0.00491805	0.300831	0.0652999
ACHE	0.211021	76.2023	897.524	0.0620889	0.205316	0.205037
ACLY	0.583316	18.2651	11029.5	0.000243038	0.294351	-0.0704258
ACMSD	0.495964	-14.3284	1275.57	0.00240865	0.255949	-0.135057
ACO1	0.439595	19.8424	2169.1	0.00524341	0.232521	0.175396
ACO2	0.0517007	174.495	1933.35	0.184656	0.00477721	0.604859
ACOT1	0.559928	-0.745485	160.349	0.000980891	0.143539	-0.296635
ACOT11	0.0458759	20.2843	139.875	0.194575	0.18834	0.235347
ACOT12	0.402431	-0.212594	6.78826	0.00879757	0.0467278	-0.432151
ACOT13	0.050307	29.1515	421.41	0.186362	0.0343943	0.461779
ACOT2	0.134182	20.107	481.26	0.102552	0.106159	0.341654
ACOT4	0.495964	2.62647	235.85	0.00189728	0.173898	-0.256742
ACOT7	0.00507629	365.567	184.885	0.361153	0.00546909	0.596391
ACOT8	0.00741476	22.0971	398.213	0.334167	0.0410222	0.444841
ACOX1	0.128981	67.3744	1513.55	0.105488	0.178996	0.247605
ACOX2	0.398289	6.063	203.619	0.0098762	0.281384	-0.0913752
ACOX3	0.293002	22.9194	723.496	0.0330151	0.277863	0.108982
ACP1	0.225477	44.2618	2499.68	0.0560147	0.138113	0.303544
ACP2	0.245302	51.8394	1787.37	0.048469	0.0679843	0.397371
ACP5	0.495964	-30.2406	1773.78	0.00251228	0.280436	0.0980612
ACSBG1	0.442526	-0.285967	21.3822	0.00510167	0.168109	-0.263874
ACSBG2	0.391854	0.430328	15.7506	0.0118016	0.189701	0.230444
ACSF3	0.186644	68.3462	965.198	0.0745713	0.19943	0.215735
ACSL1	0.196088	493.976	5614.05	0.0706007	0.123914	0.32115
ACSL3	0.288347	-27.1492	1909.12	0.0345571	0.179878	-0.246713
ACSL4	0.294477	-42.1588	2871.12	0.0327353	0.280436	-0.101404
ACSL5	0.00205715	205.498	728.185	0.420276	0.00219766	0.655896
ACSL6	0.428291	1.23589	45.8459	0.00670326	0.374846	-0.0113662
ACSM1	0.391854	2.8186	93.0409	0.0121622	0.255151	-0.136171
ACSM2A	0.391854	603.511	11712.8	0.0121426	0.241981	-0.151326
ACSM2B	0.335357	633.153	7845.01	0.0200201	0.269161	-0.118119
ACSM3	0.272401	12.9882	519.544	0.0382708	0.218452	0.189436
ACSM4	0.561807	0.108441	12.5616	0.000556611	0.323661	-0.0340986
ACSM5	0.431114	77.0959	2687.42	0.00633804	0.211846	-0.195454
ACSS1	0.245903	-77.1414	2800.24	0.0479781	0.280436	-0.0998442
ACSS2	0.298915	79.1817	1856.01	0.0316846	0.327088	0.030087
ACSS3	0.0228287	-102.078	1654.45	0.253403	0.00939931	-0.560955
ACY1	0.434393	3.98585	143.072	0.00588134	0.223783	-0.184979
ACYP1	0.323862	-6.39795	344.037	0.0246439	0.2814	-0.0840206
ACYP2	0.0962245	-7.92595	465.933	0.132629	0.0693687	-0.394251
ADA	0.235148	16.0973	565.395	0.0520867	0.106466	0.341208
ADAD2	0.738455	-0.00963399	8.53276	6.5832e-06	0.0965491	-0.354566
ADAL	0.0161262	-8.93201	427.594	0.277915	0.0310657	-0.471362
ADAM10	0.561807	10.054	4814.88	0.000696535	0.260298	0.128148
ADAM11	0.0290394	3.74467	24.0147	0.231223	0.0288772	0.478271
ADAM12	0.208383	77.7071	440.679	0.0633572	0.264951	0.123914
ADAM15	0.0327409	286.288	2145.22	0.222467	0.0210995	0.503901
ADAM17	0.109676	24.6083	549.117	0.117879	0.0522757	0.422778
ADAM18	0.495964	-0.679476	30.0351	0.00259762	0.233433	0.165513
ADAM19	0.371079	14.6911	622.412	0.0144169	0.299183	0.0664142
ADAM1A	0.391854	2.78066	230.431	0.0118768	0.285976	-0.0780032
ADAM1B	0.000945771	-1.95037	28.7075	0.469404	0.000404105	-0.755071
ADAM20	0.213583	-0.394474	8.35674	0.0604926	0.0891119	-0.36617
ADAM20P1	0.431114	-0.11427	5.84982	0.00655588	0.199952	-0.214843
ADAM21	0.04459	-0.867913	12.5726	0.197479	0.00864055	-0.567002
ADAM22	0.313359	44.2382	756.83	0.027374	0.320674	0.0421218
ADAM23	0.00285752	-10.641	114.652	0.396834	0.00713414	-0.579406
ADAM28	0.581935	-6.14435	1314.93	0.000290736	0.204351	-0.210386
ADAM29	0.196088	-0.154008	3.08576	0.0707815	0.0987748	-0.351718
ADAM32	0.402431	-0.721598	50.1286	0.00908405	0.316776	-0.0557166
ADAM33	0.726719	-0.0732997	21.7225	3.46501e-05	0.233118	-0.174059
ADAM7	0.10476	1.03263	-2.88369	0.124289	0.013033	0.539279
ADAM8	0.0272071	384.186	-415.206	0.237808	0.00795144	0.572544
ADAM9	0.0731592	423.059	3299.17	0.156542	0.026728	0.485626
ADAMDEC1	0.507298	-10.7219	538.991	0.00171136	0.374846	-0.010029
ADAMTS1	0.00303982	-485.289	7183.63	0.392934	0.00122214	-0.698909
ADAMTS10	0.0559956	-204.318	4248.63	0.177988	0.00867523	-0.566526
ADAMTS12	0.727756	0.333809	263.363	1.53953e-05	0.346227	0.023401
ADAMTS13	0.14041	-14.5042	399.093	0.0987192	0.0522757	-0.422778
ADAMTS14	0.126428	58.3077	332.319	0.107252	0.23905	0.158235
ADAMTS15	0.0951218	94.0905	-121.646	0.134343	0.253067	0.139514
ADAMTS16	0.191628	-3.37553	67.7784	0.0723414	0.0957738	-0.357032
ADAMTS17	0.142901	4.76891	51.2428	0.0969848	0.107548	0.340094
ADAMTS18	0.00126511	-11.5934	121.43	0.451224	0.0539673	-0.420147
ADAMTS19	0.169743	0.230326	0.0525087	0.0817931	0.15963	0.273169
ADAMTS2	0.00254037	-138.408	1807.31	0.405893	0.0957738	-0.357032
ADAMTS20	0.36612	-0.0847101	2.3467	0.0153201	0.266896	-0.121375
ADAMTS3	0.115696	45.8205	-34.725	0.114254	0.260298	0.130154
ADAMTS4	0.000162849	-629.232	7123.57	0.588198	0.000133848	-0.801205
ADAMTS5	0.000162849	-128.219	1547.3	0.571252	0.00375742	-0.621352
ADAMTS6	0.010696	-8.18412	122.52	0.30997	0.0280762	-0.480723
ADAMTS7	0.00195495	-97.1864	1210.6	0.423253	0.0149367	-0.528416
ADAMTS7P2	0.184511	-0.148377	2.22548	0.075514	0.0276072	-0.482588
ADAMTS7P3	0.22938	0.376814	2.60435	0.054543	0.199952	0.214175
ADAMTS7P4	0.0127881	6.41916	-7.25733	0.295233	0.0297675	0.47582
ADAMTS8	0.273423	-1.05069	38.7258	0.0380186	0.195846	-0.220415
ADAMTS9	0.0087155	-81.2216	1875.82	0.32365	0.0569303	-0.414309
ADAMTS9_AS1	0.192721	-60.5649	1306.65	0.0718851	0.157036	-0.276354
ADAMTS9_AS2	0.0969653	-27.4478	559.453	0.131945	0.0277568	-0.48206
ADAMTSL1	0.0543273	-9.53808	137.839	0.180791	0.0474113	-0.430132
ADAMTSL2	0.0177576	-18.9027	261.43	0.270155	0.0192985	-0.510141
ADAMTSL3	0.246666	38.6678	606.816	0.0470582	0.204351	0.211054
ADAMTSL4	0.191085	64.4895	1140.66	0.0726362	0.278508	0.105416
ADAMTSL4_AS1	0.206699	-1.05392	28.7457	0.064403	0.0321225	-0.468242
ADAMTSL5	0.0233964	31.7764	-88.0452	0.251352	0.035384	0.458436
ADAP1	0.196088	22.5313	204.956	0.0708553	0.167092	0.265434
ADAP2	0.42436	20.2401	1321.71	0.00689442	0.262377	0.124805
ADAR	0.00884637	216.498	6241.44	0.322142	0.0125641	0.541788
ADARB1	0.00208646	-88.5989	1506.22	0.418415	0.00335565	-0.630712
ADARB2	0.157373	1.09868	6.04728	0.0888361	0.122165	0.322711
ADAT1	0.347054	-7.96969	955.15	0.0178381	0.204351	-0.207266
ADAT2	0.105587	-12.8718	385.627	0.122885	0.17606	-0.253399
ADAT3	0.00267963	11.9883	124.865	0.401821	0.00335565	0.629598
ADCY1	0.00016763	-28.6149	309.986	0.563313	0.0149655	-0.528193
ADCY10	0.000238895	-8.1677	105.034	0.538023	0.032564	-0.466905
ADCY10P1	0.0225337	-14.7265	263.75	0.254587	0.0336756	-0.464008
ADCY2	0.210099	13.7061	3.95694	0.0625913	0.209886	0.198797
ADCY3	0.0673247	53.4968	615.357	0.165305	0.0374987	0.453087
ADCY4	0.017365	-77.7253	1149.62	0.271898	0.0149944	-0.527971
ADCY5	0.345143	-35.7323	909.328	0.0183743	0.0385133	-0.450413
ADCY6	0.296618	-47.7719	2271.05	0.0322096	0.167717	-0.26432
ADCY7	0.10856	65.4336	258.016	0.119622	0.0343943	0.461779
ADCY8	0.410588	2.79446	36.5131	0.00795943	0.191838	-0.226533
ADCY9	0.486083	12.9645	1628.18	0.0033265	0.211846	-0.196122
ADH1B	0.336093	-12.653	199.143	0.0198315	0.146362	-0.292401
ADH1C	0.0812788	10.8893	-35.3641	0.147447	0.121497	0.323602
ADH4	0.226185	-0.230092	4.24665	0.0558294	0.175369	-0.25523
ADH5	0.327984	-56.414	4319.9	0.0235919	0.280436	-0.103856
ADH5P4	0.154771	0.237037	4.47798	0.0906072	0.0680014	0.396702
ADH6	0.040578	15.6808	30.022	0.204338	0.00968895	0.558949
ADI1	0.396942	72.7368	4303.74	0.0101551	0.300912	-0.0621797
ADK	0.0838215	-22.1731	714.538	0.144358	0.251083	-0.140629
ADO	0.161765	19.74	647.855	0.0863818	0.0825394	0.375753
ADORA1	0.0159944	182.379	-528.939	0.279649	0.00788226	0.573212
ADORA2A	0.561807	-0.291159	67.8043	0.000778021	0.195846	-0.220415
ADORA2A_AS1	0.317757	11.4638	343.015	0.0261474	0.290788	-0.0764432
ADORA2B	0.0397417	25.1518	-34.8866	0.206057	0.0574417	0.41364
ADORA2BP	0.31123	0.245605	1.74392	0.0295663	0.255949	0.13465
ADORA3	0.245903	30.5453	511.448	0.0480931	0.175369	0.255182
ADPGK	0.0281168	149.281	2140.68	0.234549	0.0058204	0.592825
ADPGK_AS1	0.583316	0.0366069	10.0173	0.000188866	0.323661	0.0347672
ADPRM	0.00360196	-24.2051	383.491	0.382484	0.189464	-0.231781
ADSL	0.0559339	78.0739	1149.2	0.178184	0.0374987	0.453087
AFMID	0.486083	-12.1311	1455.13	0.00333116	0.280436	-0.102964
AGA	0.106722	23.5934	588.275	0.121732	0.0957738	0.356809
AGAP1	0.442526	25.0295	2292.13	0.0048942	0.269161	-0.117228
AGAP1_IT1	0.581935	-0.139299	30.1763	0.00035995	0.19131	-0.228438
AGAP10	0.010696	-0.258238	3.26344	0.309736	0.00453848	-0.609258
AGAP11	0.365529	-0.295996	8.17592	0.0155404	0.129562	-0.312116
AGAP2	0.292154	4.67993	142.642	0.0332139	0.172779	0.258079
AGAP2_AS1	0.338717	0.861869	25.8036	0.0193758	0.260757	0.127034
AGAP3	0.00161461	193.776	2677.98	0.435986	0.00206503	0.660353
AGAP4	0.00161461	-7.70044	95.3145	0.436804	0.14409	-0.295744
AGAP5	0.396942	-0.380978	17.2656	0.0103139	0.0645589	-0.40272
AGAP6	0.0357099	-29.1437	673.168	0.215418	0.00883758	-0.564075
AGAP7	0.232828	1.25773	7.36514	0.052811	0.320674	0.0499221
AGAP8	0.0587337	-9.30285	181.375	0.175285	0.00523797	-0.600402
AGAP9	0.0486151	-2.43253	40.8611	0.189458	0.00876588	-0.564966
AGK	0.0262347	60.3739	797.371	0.241395	0.0318793	0.469134
AGL	0.232486	12.8958	782.684	0.0531567	0.281384	0.0938268
AGMAT	0.10476	89.3167	333.765	0.124331	0.120333	0.324939
AGPAT1	0.331783	9.77134	810.243	0.0220073	0.162278	0.270783
AGPAT2	0.514849	11.8444	2804.43	0.00157794	0.281384	0.0929353
AGPAT3	0.0248374	177.128	3045.18	0.246311	0.0692549	0.394474
AGPAT4	0.158981	-13.1617	448.385	0.0877728	0.18834	-0.235347
AGPAT5	0.136406	31.132	851.083	0.101217	0.0685752	0.395811
AGPS	0.134339	90.3131	1758.74	0.102356	0.0793029	0.380656
AGXT	0.290503	11.3042	68.0975	0.0338252	0.277863	-0.109205
AGXT2	0.583316	-6.75413	1881.55	0.00015644	0.226362	-0.182305
AHCY	0.00474753	245.554	2602.28	0.365422	0.00108777	0.704035
AHCYL1	0.000530208	414.55	2535.07	0.500089	0.00356824	0.62514
AHCYL2	0.561807	-5.42068	1137.16	0.000870169	0.368555	-0.0127034
AHCYP2	0.582983	-0.0104648	2.7109	0.000255922	0.300912	0.0610926
AK1	0.078061	-5.2104	182.356	0.151541	0.112187	-0.3343
AK2	0.0396837	297.586	3794.35	0.206242	0.0457931	0.433921
AK3	0.0070919	-115.338	2502.13	0.337148	0.0497604	-0.426789
AK3P2	0.313359	-0.218553	4.58331	0.0283728	0.0477174	-0.429635
AK3P3	0.10115	-0.782451	16.0952	0.127612	0.0407111	-0.44551
AK3P5	0.489787	-0.0842377	5.85972	0.00307533	0.223783	-0.185144
AK4	0.0727812	310.577	2674.09	0.156901	0.0752978	0.386673
AK4P1	0.280017	0.780898	10.0483	0.0366116	0.258074	0.133051
AK4P3	0.310714	0.140697	1.79217	0.0297908	0.252572	0.140004
AK4P4	0.495964	0.0312644	1.07544	0.00239715	0.277863	-0.109809
AK5	0.251433	2.59879	27.2862	0.0444718	0.300912	0.0646313
AK7	0.00113951	-12.2402	170.097	0.460027	0.0960257	-0.355472
AK8	8.28762e-05	-24.6112	317.247	0.61519	0.00227594	-0.653444
AK9	5.68002e-05	-57.5502	797.329	0.653095	0.000790024	-0.725207
AKR1A1	0.0601613	537.58	3260.43	0.173054	0.114849	0.330734
AKR1B1	0.0161262	1427.39	-1995.25	0.278503	0.00456762	0.608425
AKR1B10	0.360785	5.01986	60.4505	0.0165335	0.18834	0.236016
AKR1B10P1	0.157906	0.132084	0.127448	0.0884555	0.147806	0.290886
AKR1B15	0.391854	0.421055	4.32978	0.012249	0.178416	0.249777
AKR1B1P1	0.0559956	0.221341	-0.379706	0.178027	0.0272047	0.483787
AKR1B1P7	0.0433562	0.508311	-1.32122	0.199556	0.0111661	0.549744
AKR1C1	0.420242	14.4046	925.116	0.00731105	0.281384	-0.0909295
AKR1C2	0.172215	28.4477	61.4463	0.0806387	0.0838514	0.37397
AKR1C3	0.402431	72.9369	4510.85	0.00891942	0.266092	0.122577
AKR1C4	0.495964	-0.632464	37.1355	0.00265376	0.152882	-0.28116
AKR1D1	0.213583	0.417626	0.872277	0.0607623	0.189464	0.231165
AKR7A2	0.0168484	265.012	596.438	0.27439	0.00530424	0.598619
AKR7A2P1	0.168473	-0.864236	16.6855	0.0825646	0.0142185	-0.531996
AKR7A3	0.297885	28.5246	159.48	0.031968	0.320674	-0.0499221
AKR7L	0.313359	7.21688	36.7924	0.028235	0.232156	-0.176287
ALAD	0.232486	-29.338	1762.82	0.0535793	0.230931	-0.177179
ALAS1	0.0839168	37.9596	541.291	0.144091	0.02394	0.493872
ALAS2	0.523171	-0.323634	24.5394	0.00128867	0.233433	0.165144
ALDH18A1	0.10115	127.542	2283.06	0.127568	0.0625966	0.406063
ALDH1A1	0.232828	675.423	5618.99	0.0526634	0.181473	0.244039
ALDH1A2	0.0207474	12.4187	45.0058	0.259997	0.0117969	0.5458
ALDH1A3	0.495964	-3.58382	308.595	0.00238418	0.320674	-0.0514821
ALDH1B1	0.712538	0.527317	488.217	5.26273e-05	0.299183	0.0664142
ALDH1L1	0.495964	-21.1895	2135.59	0.00196712	0.18783	-0.237576
ALDH1L1_AS1	0.202278	-0.307761	5.04666	0.0664986	0.126049	-0.317562
ALDH1L1_AS2	0.391854	1.40886	9.61389	0.011794	0.0820391	-0.37709
ALDH1L2	0.165734	-27.1435	442.689	0.0840332	0.0309012	-0.472031
ALDH2	0.00479335	493.159	2516.66	0.364776	0.00463465	0.607311
ALDH3A1	0.0342251	9.37516	16.6366	0.219065	0.0240173	0.493426
ALDH3A2	0.334012	129.012	2682.45	0.0202751	0.156223	0.277023
ALDH3B1	0.0122541	242.016	1883.4	0.298421	0.0744299	0.387788
ALDH3B2	0.0330191	0.222516	-0.678358	0.221688	0.0560331	0.415655
ALDH4A1	0.152892	160.788	744.915	0.0920927	0.150745	0.286606
ALDH5A1	0.22083	52.1481	661.613	0.0575235	0.155709	0.277914
ALDH6A1	0.258116	37.7964	543.303	0.0431144	0.270205	-0.116113
ALDH7A1	0.561807	10.1399	3101.17	0.00074268	0.318842	0.0532651
ALDH7A1P1	0.328412	0.235543	6.58625	0.0234561	0.230561	0.177625
ALDH8A1	0.332742	29.7712	380.592	0.0216295	0.249697	-0.142412
ALDH9A1	0.0450302	184.368	992.181	0.196203	0.0844911	0.372633
ALDOA	0.200211	4046.53	58944.4	0.0682878	0.186104	0.239804
ALDOAP1	0.313359	0.124655	1.32923	0.0277691	0.11563	0.329685
ALDOAP2	0.00185611	0.801962	-1.71347	0.42601	0.000645682	0.733089
ALDOB	0.484444	36.7275	693.57	0.00350459	0.227117	-0.180522
ALDOC	0.100981	-186.523	3379.06	0.127903	0.0738331	-0.388902
ALG1	0.280133	24.5787	781.228	0.0363029	0.160474	0.272343
ALG10	0.437072	0.807623	83.7395	0.00543032	0.346227	-0.0229552
ALG10B	0.514849	-0.380892	117.578	0.00156381	0.323661	0.03343
ALG11	0.201892	-3.2384	180.225	0.0668702	0.233433	-0.171161
ALG12	0.179539	23.6296	506.325	0.0774958	0.173375	0.257411
ALG13	0.24802	-24.3163	1508.57	0.046128	0.0400287	-0.447293
ALG13_AS1	0.166319	-1.45457	30.1411	0.0837997	0.0252371	-0.490083
ALG14	0.00959956	21.0414	218.101	0.317162	0.00593998	0.59171
ALG1L	0.309175	-0.255022	10.7121	0.0300277	0.294351	-0.0713173
ALG1L10P	0.204659	0.486827	8.86876	0.0653688	0.254632	0.137509
ALG1L11P	0.0028278	-0.623862	6.92145	0.397537	0.01123	-0.549063
ALG1L12P	0.213583	-0.231051	4.89143	0.0605214	0.277166	-0.111685
ALG1L13P	0.738455	0.0339584	37.5533	1.01197e-05	0.178451	-0.249165
ALG1L15P	0.327073	0.0869909	1.50953	0.0237763	0.19131	0.228469
ALG1L2	0.738455	0.00576691	15.3825	5.7857e-06	0.279357	-0.104301
ALG1L3P	0.0150401	-0.14468	1.8108	0.283567	0.0264295	-0.486576
ALG1L6P	0.378072	1.71486	33.1427	0.013794	0.320674	-0.0519279
ALG1L7P	0.266652	-0.51053	10.0763	0.0402639	0.18834	-0.235944
ALG1L8P	0.391942	0.118191	3.87649	0.0113594	0.358583	0.0142698
ALG1L9P	0.726719	-0.00774816	8.11993	3.89749e-05	0.283385	-0.0829063
ALG2	0.00665157	-53.0243	1491.18	0.340997	0.0873081	-0.368398
ALG3	0.0782502	86.125	898.575	0.15101	0.0376935	0.451973
ALG3P1	0.0189696	-0.189348	2.24164	0.265328	0.00722478	-0.578418
ALG5	0.00205715	-116.993	2338.55	0.419617	0.0965491	-0.35458
ALG6	0.00127453	36.7604	336.634	0.450171	0.00122214	0.698463
ALG8	0.10476	30.7462	847.404	0.124373	0.0252371	0.490306
ALG9	0.398473	-3.57436	316.256	0.00964961	0.178451	-0.248942
ALG9_IT1	0.495964	-0.0278825	2.59353	0.00259878	0.278508	-0.106355
ALLC	0.0809861	0.518874	1.58558	0.147907	0.12194	0.322969
ALOX12	0.328412	-3.11975	230.915	0.023359	0.111531	-0.334968
ALOX12B	0.0159944	18.0679	-46.9354	0.279426	0.0168981	0.520616
ALOX12P1	0.495964	-0.0181294	0.968719	0.00254011	0.280436	-0.10179
ALOX12P2	0.109592	8.15203	92.9922	0.118336	0.191356	0.227769
ALOX15	0.334012	0.134021	1.35694	0.0202175	0.204351	0.207398
ALOX15B	0.333921	-8.76809	276.36	0.0210594	0.0920523	-0.361266
ALOX5	0.0048306	298.596	672.195	0.363982	0.0296682	0.476488
ALOX5AP	0.0499919	236.272	-274.723	0.186991	0.0139045	0.533319
ALOXE3	0.0781241	2.78346	-7.46742	0.15122	0.0545382	0.419274
ALPI	0.867506	0.00964455	42.049	1.03611e-07	0.18834	-0.235705
ALPL	0.153551	65.0975	50.8055	0.0914316	0.0862237	0.369958
AMACR	0.200092	-6.11075	249.946	0.0691818	0.204351	-0.211054
AMD1	0.295799	-63.0306	2782.19	0.0323912	0.457289	-0.00423446
AMD1P1	0.0970855	-0.297017	5.73199	0.131224	0.195846	-0.219398
AMDHD1	0.378072	4.00021	81.5595	0.0136919	0.244103	-0.147092
AMDHD2	0.201299	46.3503	733.324	0.0677904	0.13417	0.306664
AMPD1	0.431114	0.714887	12.798	0.00652189	0.24827	0.143193
AMPD2	0.0129932	130.027	1268.78	0.293367	0.0370695	0.454202
AMPD3	0.31123	43.6272	690.107	0.0295575	0.233433	0.17183
AMT	0.618831	1.70818	776.943	0.000109164	0.233118	-0.174504
AMY2B	0.310714	16.7142	291.243	0.0297568	0.280436	-0.0949411
ANPEP	0.0182183	3154.53	2286.9	0.268015	0.0435466	0.438601
AOC1	0.0283377	-1109.65	15407.2	0.233665	0.052746	-0.421886
AOC2	0.317757	-1.14934	55.3983	0.026213	0.129671	-0.311567
AOC3	0.00602198	-97.5751	1374.2	0.349306	0.00356824	-0.625586
AOX1	0.0715965	-229.593	3860.2	0.158499	0.0643553	-0.403611
APIP	0.0456485	36.3295	542.77	0.195101	0.0275463	0.482952
APRT	0.177758	268.332	3348.1	0.0783494	0.171672	0.260754
ARG1	0.402431	0.131502	4.41054	0.00903277	0.320674	0.0369958
ARG2	0.431114	-7.13827	306.309	0.00618765	0.101166	-0.348786
ARSA	0.119019	131.112	2045.49	0.112534	0.178451	0.249165
ARSB	0.0875578	-58.3768	1803.24	0.140853	0.0300966	-0.47426
ASAH1	0.239004	221.577	4786.66	0.0499905	0.0355764	0.457545
ASAH2	0.0694918	-0.873671	13.7309	0.161418	0.189464	-0.231852
ASAH2B	0.0236695	3.96769	103.279	0.249979	0.0232606	0.496546
ASH1L	0.495964	-5.2854	2316.23	0.00190841	0.178451	-0.248719
ASH1L_AS1	0.0722096	-5.11869	126.056	0.157639	0.00356824	-0.624695
ASH1L_IT1	0.111691	-0.326497	5.62656	0.116322	0.0297675	-0.475569
ASL	0.476708	-5.24618	1212.69	0.00379854	0.230561	-0.17807
ASLP1	0.00300801	-10.2876	148.107	0.393904	0.00738735	-0.577001
ASMT	0.0418046	0.475961	1.28122	0.202499	0.11108	0.33586
ASMTL	0.727756	0.27049	734.821	1.55869e-05	0.280436	-0.0989527
ASMTL_AS1	0.313359	18.0157	256.517	0.0281337	0.204351	0.206374
ASNS	0.327984	-40.3102	2304.75	0.0236199	0.233433	-0.169156
ASNSD1	0.561807	3.2929	1169.82	0.000496398	0.204351	0.208157
ASNSP3	0.0681793	0.353148	-0.797364	0.16388	0.167092	0.265897
ASNSP5	0.490311	0.042832	1.71147	0.00294274	0.273016	-0.113614
ASPA	0.139632	-174.855	2518.12	0.0990871	0.0145036	-0.530422
ASPDH	0.333921	18.6641	207.557	0.0207853	0.240564	-0.153332
ASRGL1	0.0343163	-116.633	1926.93	0.218759	0.1857	-0.240473
ASS1	0.0777224	-265.342	4885.13	0.151856	0.117569	-0.327614
ASS1P1	8.1063e-05	-10.6089	109.24	0.620575	0.000404105	-0.753957
ASS1P10	0.246666	-0.324975	8.16393	0.0472507	0.0679843	-0.397771
ASS1P12	0.238023	-0.411016	15.3669	0.0508708	0.249697	-0.142412
ASS1P2	0.522143	-0.144883	21.3642	0.00133835	0.18834	-0.23401
ATIC	0.0312154	143.127	1419.96	0.226003	0.0164653	0.522622
ATP6AP1	0.419982	-34.718	6436.54	0.00739257	0.320674	-0.0390016
ATP6AP1L	0.00215087	-26.2512	493.276	0.416498	0.00265918	-0.643861
ATP6AP2	0.169495	-156.18	7404.35	0.0820487	0.190298	-0.229998
ATP6V0A1	0.328412	61.7232	3154.8	0.0231659	0.457289	-0.00423446
ATP6V0A2	0.00137319	-29.7393	849.6	0.444943	0.00156931	-0.673057
ATP6V0A4	0.0358293	0.684276	-1.31227	0.214574	0.0239783	0.493634
ATP6V0B	0.10476	242.166	3325.23	0.124453	0.0853103	0.371741
ATP6V0C	0.376757	1.11284	39.9722	0.0140287	0.320674	0.0418989
ATP6V0CP1	0.495964	-0.141648	10.2409	0.00246248	0.18115	-0.245039
ATP6V0CP3	0.561807	0.0153504	1.28527	0.000839984	0.244786	0.145933
ATP6V0D1	0.211941	103.37	2889.45	0.0615252	0.140476	0.300647
ATP6V0D2	0.0932706	3.72929	-2.80427	0.135772	0.0977213	0.35302
ATP6V0E1	0.280536	-108.051	6579.29	0.0359532	0.16246	-0.270337
ATP6V0E1P1	0.320333	-0.320709	9.42173	0.0258137	0.0798699	-0.37971
ATP6V0E1P2	0.153551	-0.487096	9.97821	0.0913875	0.0693687	-0.394251
ATP6V0E2	0.00741476	92.9803	484.968	0.333855	0.00825556	0.570092
ATP6V0E2_AS1	0.0790375	3.00905	28.1393	0.150014	0.0679843	0.397371
ATP6V1A	0.0980637	110.87	2080.05	0.130373	0.0548788	0.418097
ATP6V1B1	0.232486	-2.13144	49.6829	0.0533788	0.0638082	-0.404503
ATP6V1B2	0.0343163	274.768	2710.73	0.218814	0.00143485	0.678182
ATP6V1C1	0.398473	41.98	2679.09	0.00968043	0.280436	0.0982841
ATP6V1C2	0.04006	5.10454	26.6438	0.205431	0.0318189	0.469357
ATP6V1D	0.157906	33.3285	1117.21	0.0884177	0.0372091	0.453756
ATP6V1E1	0.396942	31.9735	4519.79	0.0102672	0.255151	0.135949
ATP6V1E1P1	0.0832999	0.178238	0.334687	0.145249	0.0861332	0.370147
ATP6V1E2	0.0261192	14.8543	207.923	0.242	0.066788	0.399377
ATP6V1F	0.0293129	194.073	1235.4	0.230512	0.016434	0.522845
ATP6V1G1	0.038366	-119.003	3641.93	0.208842	0.17606	-0.253176
ATP6V1G1P2	0.36612	0.181494	2.04049	0.0153749	0.0679843	0.396913
ATP6V1G1P4	0.391854	-0.209332	10.0684	0.0117304	0.226759	-0.181859
ATP6V1G2.1	0.00628824	-2.78569	37.559	0.345104	0.0041755	-0.614443
ATP6V1H	0.495964	-18.5859	2109.46	0.00266659	0.277863	-0.108982
ATP8A1	0.561807	2.3357	554.509	0.000726299	0.233433	-0.170716
ATP8A2	0.0851739	72.0646	-173.538	0.142794	0.252892	0.139737
ATP8A2P2	0.00516421	-1.40335	15.6624	0.359283	0.044413	-0.436874
ATP8B1	0.245595	54.0828	523.911	0.0482498	0.243929	0.148429
ATP8B2	0.561807	2.77486	810.174	0.000928825	0.346227	0.0184979
ATP8B3	0.365529	49.1544	1084.58	0.0155344	0.233433	0.172053
ATP8B4	0.295329	17.0637	239.225	0.0324885	0.195846	0.220861
ATP8B5P	0.33263	0.750657	20.2056	0.0217855	0.374846	0.0106976
AUH	0.154283	-22.2963	824.994	0.0909469	0.152882	-0.280812
B3GALNT1	0.0419456	73.5584	542.317	0.202219	0.0336756	0.464008
B3GALNT2	0.305073	3.49099	185.913	0.030786	0.255151	0.13684
B3GALT1	0.0931995	0.973377	2.68254	0.135998	0.152882	0.281035
B3GALT2	0.00507629	-2.01113	34.7113	0.361072	0.00127185	-0.688211
B3GALT4.3	0.333921	-5.20399	330.946	0.0203705	0.374846	0.0115891
B3GALT5	0.0353541	92.1969	-248.281	0.216443	0.300912	0.0644084
B3GALT6	0.0211925	67.7106	928.81	0.258317	0.0327612	0.466237
B3GAT1	0.495964	0.8076	87.2683	0.00214548	0.2814	0.0849121
B3GAT2	0.0525496	-2.06097	33.2679	0.183619	0.00939931	-0.560732
B3GAT3	0.156494	145.475	2275.46	0.0898843	0.174969	0.255851
B3GNT2	0.00274603	-66.8336	1749.1	0.399848	0.0325136	-0.467128
B3GNT3	0.0116766	170.356	45.2622	0.301939	0.00738735	0.577224
B3GNT4	0.273423	-30.2235	870.359	0.0378474	0.130743	-0.310453
B3GNT5	0.149946	28.1466	300.761	0.0935626	0.137947	0.303767
B3GNT7	0.120185	14.6796	104.172	0.111731	0.104715	0.344106
B4GALNT1	0.0468777	43.1966	-66.7627	0.192895	0.19131	0.228215
B4GALNT2	0.288347	-0.414141	7.71257	0.0346237	0.151995	-0.284372
B4GALNT3	0.226804	6.24007	39.8763	0.0553524	0.244103	0.147983
B4GALNT4	0.0547937	133.337	225.456	0.179967	0.148299	0.289726
B4GALT1	0.0694217	-391.194	9404.55	0.16163	0.0752978	-0.386227
B4GALT2	0.00044338	231.001	377.402	0.508067	0.00143485	0.678405
B4GALT3	0.345385	-9.1742	1483.12	0.0180981	0.280436	-0.0976155
B4GALT4	0.0520023	94.3118	701.493	0.184256	0.17606	0.253399
B4GALT5	0.191085	134.964	2861.93	0.072666	0.164266	0.268554
B4GALT6	0.040089	-43.2353	601.595	0.205173	0.190298	-0.229998
B4GALT7	0.313359	97.1349	2010.66	0.0280345	0.281384	-0.0927124
BAAT	0.0437292	18.851	-52.7601	0.198686	0.0090494	0.562961
BBOX1	0.157194	-225.513	3797.64	0.089478	0.129107	-0.313127
BCAT1	0.0969653	158.496	689.815	0.131604	0.152882	0.281035
BCAT2	0.258116	52.1989	1533.12	0.0425556	0.457289	0.003343
BCKDHA	0.0245074	0.928113	4.53009	0.247632	0.0310066	0.471585
BCKDHB	0.208383	-16.4907	718.318	0.0633832	0.19943	-0.215735
BDH1	0.396942	3.12992	126.425	0.0101598	0.293579	-0.0746602
BHMT	0.529012	36.2764	2741.99	0.00125328	0.269161	-0.118119
BHMT2	0.140783	-390.038	8429.74	0.0982332	0.0825394	-0.375976
BLVRA	0.0163763	-127.813	3128.32	0.276723	0.130743	-0.310453
BLVRB	0.00638184	409.306	1187.32	0.343985	0.00246536	0.648541
BPGM	0.0259703	-43.6768	1151.16	0.242467	0.221008	-0.187431
BPNT1	0.0802529	-27.1746	1170.72	0.148923	0.0385133	-0.450413
BST1	0.0088317	28.5921	141.817	0.322492	0.0200931	0.50769
BTD	0.391942	-3.91572	458.174	0.0109605	0.299183	-0.0664142
C1GALT1	0.00274603	-121.327	2621.35	0.399754	0.00275456	-0.64141
C1GALT1C1	0.238023	-15.5256	970.064	0.0506612	0.233433	-0.166258
CA1	0.130174	-5.2214	61.7786	0.104804	0.191838	-0.226878
CA10	0.276779	0.0856473	0.595068	0.0373285	0.205316	0.205046
CA11	0.443472	-3.59198	322.044	0.00463907	0.320674	0.0390016
CA12	0.248212	1699.42	32549.3	0.0458276	0.195846	0.219746
CA13	0.100325	18.6631	241.321	0.128749	0.150837	0.285938
CA14	0.232828	3.03207	49.7858	0.0527921	0.23898	0.158681
CA15P1	0.100325	-1.48704	29.7708	0.128905	0.0372791	-0.453533
CA2	0.583316	-8.17702	3074.79	0.000174515	0.241658	0.151995
CA3	0.204659	2.03005	32.5634	0.0652496	0.293579	0.0744374
CA4	0.497374	-1.98425	75.8242	0.00181681	0.191838	-0.226878
CA5A	0.326487	0.101817	1.22663	0.0239254	0.266092	0.123123
CA5B	0.0045935	-21.5231	424.24	0.368249	0.00487167	-0.603968
CA5BP1	0.156624	10.0035	387.313	0.0897219	0.187935	0.237353
CA6	0.0322964	0.953931	0.418978	0.223746	0.0114097	0.547806
CA7	0.105142	0.163857	-0.0625201	0.123309	0.0410899	0.444391
CA8	0.166538	-2.951	53.7843	0.0833034	0.0545382	-0.419212
CA9	0.0478721	-411.232	7755.17	0.191721	0.0964222	-0.355026
CAD	0.0126025	96.982	1280.26	0.296404	0.0268811	0.484957
CADM1	0.119558	-78.1008	2084.38	0.112112	0.104715	-0.344551
CADM3	0.0103191	-17.6515	224.618	0.312296	0.00219766	-0.656119
CADM4	0.0596706	52.3538	172.183	0.174074	0.0548788	0.418543
CADPS	0.264159	-0.762415	14.51	0.0409176	0.241658	-0.152012
CADPS2	0.0696511	110.604	868.166	0.161131	0.118793	0.326722
CAMKMT	0.738455	0.110966	282.704	6.61704e-06	0.320674	0.0405617
CANT1	0.013281	111.159	1562.78	0.291256	0.0102028	0.555606
CARNS1	0.0261192	25.7833	-29.5497	0.241977	0.0305258	0.473145
CAT	0.233296	90.4539	2816.27	0.0524926	0.233433	0.166481
CATSPER1	0.240632	3.29742	29.3586	0.0495258	0.0491186	0.427681
CATSPER2	0.460727	-6.32339	479.069	0.00426601	0.0752978	-0.38645
CATSPER2P1	0.488204	2.27036	147.329	0.0031803	0.194854	-0.222421
CATSPER3	0.0122541	-6.18431	83.1681	0.298563	0.0803245	-0.379096
CATSPERB	0.376452	-0.601345	32.0189	0.0140778	0.260298	-0.129485
CATSPERD	0.0807536	0.412691	1.38996	0.148145	0.0587866	0.411857
CATSPERG	0.24802	6.26531	128.438	0.0460497	0.255151	0.13684
CBR1	0.0998037	113.122	1671.17	0.129357	0.0144481	0.530868
CBR3	0.0122541	-23.4527	295.718	0.298671	0.191838	-0.226432
CBR3_AS1	0.095345	-1.94586	55.581	0.134055	0.127619	-0.315802
CBR4	0.402431	5.17099	831.663	0.00916534	0.294351	0.0719859
CBS	0.00857003	233.819	-379.806	0.324601	0.00255753	0.645644
CD38	0.200566	32.1627	215.926	0.0681318	0.12097	0.324048
CDA	0.583316	7.02127	1522.38	0.000177889	0.338176	-0.0278583
CDADC1	0.00265729	-37.5185	642.649	0.403185	0.0267789	-0.485403
CDAN1	0.442526	-1.88479	709.467	0.00480788	0.233118	-0.174504
CDIPT	0.19686	232.739	4566.05	0.0701517	0.168109	0.263651
CDIPT_AS1	0.484444	0.313695	11.3167	0.0035521	0.280436	0.0960661
CDO1	0.391942	-0.379224	14.3729	0.0110664	0.206522	-0.20214
CDS1	0.391942	11.0488	424.549	0.0113518	0.374846	0.00690886
CDS2	0.0543235	-94.6049	2379.45	0.181011	0.0619675	-0.4074
CEL	0.00405851	-3.31203	47.5127	0.376199	0.00382832	-0.619569
CELA1	0.208146	0.350198	0.393423	0.0636248	0.0513357	0.424244
CELA2A	0.726719	0.00687563	4.54467	2.97184e-05	0.190298	-0.229466
CELA2B	0.495964	0.290952	17.4548	0.00231847	0.214175	-0.193448
CELF1	0.726719	1.20288	4310.08	4.47881e-05	0.23905	-0.156675
CELF2	0.398289	26.2664	1279.82	0.00984513	0.233433	0.172944
CELF2_AS1	0.495964	0.485389	15.1402	0.00197322	0.374846	0.0109205
CELF3	0.442526	0.0658466	3.70722	0.00478085	0.293579	-0.0732198
CELF4	0.583316	-0.490091	112.224	0.000189569	0.144517	-0.294629
CELF5	0.00339826	12.9719	-17.6713	0.385434	0.00547495	0.596168
CELSR1	0.360785	64.7463	6155.96	0.0165023	0.320674	0.0512593
CELSR2	0.026862	160.05	810.904	0.239585	0.00620085	0.589036
CELSR3	0.108616	15.9494	134.178	0.119431	0.285976	0.0780032
CEPT1	0.128019	36.0824	622.077	0.106009	0.14409	0.295521
CERK	0.213799	51.2195	1709.26	0.0600851	0.133993	0.30711
CERKL	0.495964	-4.01937	758.16	0.00216358	0.278508	0.10653
CERS1	0.213081	0.698255	1.56029	0.0609222	0.139163	0.301988
CERS2	0.31123	96.7787	3538.71	0.0296395	0.209837	0.199465
CERS3	0.201299	-0.585724	15.3283	0.0676811	0.0794284	-0.380433
CERS4	0.296458	39.0036	1990.05	0.0322754	0.233433	0.169601
CERS5	0.000162849	-110.334	2779.01	0.579145	0.00200595	-0.661913
CERS6	0.0235681	37.7417	279.705	0.250622	0.00680688	0.583241
CERS6_AS1	0.31123	0.121788	2.42482	0.0294026	0.266092	0.122144
CES1	0.0109784	-6.98597	81.0205	0.30775	0.00408998	-0.61578
CES2	0.271971	989.647	8054.6	0.0384903	0.2814	-0.0880322
CH25H	0.581935	-0.702903	87.8596	0.000356823	0.220613	-0.188322
CHAC1	0.166538	9.80469	81.2092	0.0836561	0.280436	0.103187
CHAC2	0.305073	1.52112	41.4802	0.0308035	0.18341	0.242033
CHDH	0.330809	84.5736	1769.64	0.0222371	0.285515	-0.0795633
CHIAP3	0.213583	0.203066	0.821793	0.0604843	0.222866	0.185692
CHIT1	0.36612	-2.78466	104.127	0.0154101	0.299183	-0.0670828
CHKA	0.36612	4.55789	419.786	0.0151836	0.280436	0.0973926
CHKB	0.442526	-0.721598	52.2885	0.00500831	0.155844	-0.277469
CHKB_AS1	0.226442	5.12106	71.0052	0.0555998	0.233433	0.17339
CHPF	0.246666	389.269	5798.56	0.0469573	0.175369	0.255182
CHPF2	0.208373	59.7657	2050.08	0.0634498	0.1408	0.299978
CHPT1	0.391942	33.6604	1330.47	0.0112283	0.269161	-0.117673
CHST1	0.000458878	-132.791	1415.34	0.505897	0.000790024	-0.724762
CHST10	0.000162849	-41.4949	645.869	0.590847	0.00615657	-0.589482
CHST11	0.558928	17.6189	2662.48	0.000993691	0.152882	0.280589
CHST12	0.0970855	-43.369	1443.64	0.131152	0.205316	-0.20526
CHST13	0.0921939	118.054	439.109	0.137079	0.176302	0.252508
CHST14	0.291736	23.7729	1358.81	0.0333716	0.273484	0.112993
CHST15	0.313359	60.4487	3243.47	0.0277721	0.249523	0.142635
CHST2	0.000168147	-126.196	1895.75	0.562098	0.00375742	-0.621352
CHST3	0.0782502	-203.841	3384.74	0.151045	0.155709	-0.277914
CHST4	0.0361657	4.19712	-6.2789	0.21386	0.0920523	0.361489
CHST6	0.0480685	0.811887	-0.287054	0.190794	0.045349	0.435074
CHST7	0.18608	-18.7743	489.733	0.0749895	0.280436	-0.101627
CHST8	0.402431	0.146884	4.54061	0.008703	0.320674	-0.0494818
CHST9	0.140634	36.5743	-22.3895	0.0983606	0.175662	0.253845
CHSY1	0.000934987	-186.899	3611.56	0.471169	0.0129612	-0.540005
CHSY3	0.726719	-0.257821	270.088	2.11481e-05	0.320674	0.0436818
CKB	0.232486	247.281	1180.12	0.0531536	0.233433	0.170716
CKM	0.0245489	1.43211	-0.494203	0.247416	0.00685589	0.582796
CKMT1A	0.0541506	0.810833	-2.42209	0.181367	0.044474	0.436445
CKMT1B	0.0841349	0.800396	-1.94581	0.143688	0.0111787	0.549403
CKMT2	0.385836	12.1931	123.476	0.0127721	0.130743	-0.309784
CKMT2_AS1	0.000311668	-33.1962	493.322	0.524912	0.00123701	-0.689994
CMAS	0.0383565	127.504	1318.31	0.208967	0.0799316	0.379541
CMPK1	0.0692	157.521	3444.34	0.16284	0.0123204	0.542903
CMPK2	0.200092	9.37257	292.443	0.0687615	0.087562	0.36773
CNDP1	0.195342	-5.28889	122.997	0.0710943	0.162278	-0.27056
CNDP2	0.269702	600.327	20051.5	0.0392969	0.320674	0.0481391
COASY	0.0693417	97.3903	2730.49	0.161985	0.104715	0.344106
COLGALT1	0.0692	346.137	5012.55	0.162699	0.035384	0.45799
COLGALT2	0.561807	-0.980183	196.06	0.000456124	0.457289	0.00245153
COMT	0.364874	34.8026	3452.74	0.0157806	0.140476	0.300647
COMTD1	0.00546294	65.1738	503.556	0.355512	0.00275456	0.640964
COQ2	0.0613183	33.8136	166.181	0.171581	0.0965491	0.354135
COQ3	0.258116	-3.65669	162.66	0.0430663	0.374846	0.00958326
COQ5	0.618831	0.788817	990.87	0.000100056	0.346227	-0.0176064
COQ6	0.128292	3.57077	103.375	0.105827	0.204351	0.210609
COQ7	0.279104	25.5301	935.703	0.0369545	0.320674	0.0423446
COX10	0.157257	23.9936	239.201	0.0893114	0.166996	0.266325
COX10_AS1	0.431114	1.35323	147.203	0.00628428	0.255949	0.134611
COX11	0.205854	-26.9027	1726.5	0.0649287	0.261731	-0.125697
COX14	0.0274525	42.6709	490.215	0.236859	0.00955132	0.55984
COX15	0.0579275	29.0632	1344.19	0.176092	0.0108755	0.551594
COX16	0.0481717	14.8787	164.604	0.19024	0.0277568	0.48206
COX17	0.237712	42.1739	1052.04	0.051173	0.0693687	0.394028
COX17P1	0.0828725	0.557994	4.25667	0.145784	0.0680014	0.396702
COX18	0.232486	-5.85703	662.984	0.0532404	0.211791	-0.196791
COX19	0.0147548	32.3047	520.821	0.284708	0.0257536	0.488523
COX20	0.370505	-1.27665	87.7197	0.0146297	0.112958	-0.332962
COX20P1	0.230827	6.26338	34.0815	0.0541763	0.266092	0.123022
COX4I1	0.0747861	423.707	11420.6	0.154947	0.0513357	0.424338
COX4I2	0.00630525	-63.2506	751.731	0.34478	0.00956788	-0.559618
COX5A	0.021361	231.297	1802.25	0.257746	0.00665872	0.58547
COX5B	0.0248461	569.388	4391.39	0.246162	0.0104412	0.554046
COX5BP2	0.142927	-0.136717	1.97459	0.0968996	0.044474	-0.436378
COX5BP3	0.115215	-0.23982	3.5757	0.114541	0.122537	-0.322362
COX5BP6	0.495964	0.0854688	11.2602	0.00217704	0.346227	-0.0260754
COX6A1	0.028555	119.059	1124.19	0.232848	0.0108764	0.551149
COX6A1P2	0.182742	1.43546	40.7505	0.0762887	0.0370695	0.454202
COX6A2	0.161765	-2.62259	55.8476	0.0862231	0.0410222	-0.444841
COX6B1	0.0936703	311.445	4004.48	0.135325	0.107548	0.340317
COX6B1P3	0.238484	-0.108487	2.05149	0.0503423	0.0410222	-0.444801
COX6B1P5	0.168929	-0.340078	7.23875	0.0823695	0.0841127	-0.373524
COX6B2	0.0874749	0.680026	0.529787	0.141079	0.155567	0.278113
COX6C	0.561807	16.5629	5241.04	0.000436367	0.223783	0.184979
COX6CP1	0.118763	-0.81796	19.7332	0.112721	0.0192771	-0.510364
COX6CP10	0.127628	-0.281195	4.4477	0.106633	0.0908676	-0.363998
COX6CP17	0.31123	-0.115524	2.85344	0.0293296	0.228921	-0.178966
COX6CP2	0.265916	0.293862	2.93267	0.0405842	0.317667	0.0551699
COX7A1	0.402431	15.9104	468.329	0.00905635	0.280436	0.101404
COX7A2	0.0910275	113.18	2054.7	0.13811	0.0846223	0.37241
COX7A2L	0.245302	-59.4737	3807.08	0.048443	0.320674	-0.0472477
COX7A2P1	0.582983	0.0474696	7.17309	0.000280997	0.223906	-0.183958
COX7B	0.161491	76.796	2721.08	0.0866724	0.0718715	0.391131
COX7BP1	0.137736	0.257983	0.863577	0.100051	0.110379	0.33668
COX7BP2	0.323559	-0.117968	3.136	0.024876	0.078875	-0.381252
COX7C	0.153046	-302.675	9217.69	0.0919213	0.233433	-0.167596
COX7CP1	0.343833	0.290758	7.70146	0.0188706	0.22081	0.188099
COX8A	0.00607744	128.454	601.651	0.347227	0.00195375	0.664142
COX8C	0.412436	-0.0510484	1.83536	0.00774506	0.162843	-0.269893
CP	0.280017	-1535	31658.9	0.0365559	0.0951853	-0.357701
CPA2	0.351605	0.106628	1.74941	0.0173934	0.294351	-0.0697473
CPA3	0.437112	-5.39188	294.82	0.00540637	0.457289	0.00423446
CPA4	0.522143	-3.3338	222.665	0.00130996	0.114902	-0.330511
CPA5	0.726719	0.0301231	12.9077	3.94718e-05	0.2814	0.0875865
CPA6	0.00324379	-5.14004	59.0381	0.388631	0.0175765	-0.518387
CPAMD8	0.0380685	-19.754	432.084	0.209572	0.0104412	-0.554046
CPB1	0.321888	0.129996	1.61461	0.025241	0.181473	0.244547
CPB2	0.203056	-0.287741	6.24047	0.0661262	0.211846	-0.196113
CPB2_AS1	0.006423	-1.85335	26.1106	0.343352	0.140476	-0.300424
CPD	0.583316	-14.1842	5144.8	0.000199145	0.232356	0.176064
CPE	0.18948	-2453.65	42861.3	0.0732404	0.101166	-0.348786
CPEB1	0.0181664	2.76713	1.12362	0.268545	0.0264824	0.486349
CPEB2	0.495964	-20.1969	3168.13	0.00195512	0.181473	-0.244262
CPEB2_AS1	0.250315	-1.38468	36.1541	0.0449092	0.065606	-0.400714
CPEB3	0.130526	-10.1123	373.598	0.104516	0.0297675	-0.475374
CPEB3_ribozyme	0.238023	-0.194361	3.1844	0.0507728	0.00665872	-0.585394
CPEB4	0.484444	-24.3438	2410.65	0.00361261	0.179878	-0.246713
CPED1	0.036172	-20.4279	455.176	0.213737	0.0296682	-0.476488
CPHL1P	0.333855	-4.22898	106.664	0.0213563	0.150745	-0.286606
CPLX1	0.561807	1.25284	278.599	0.000659183	0.277863	0.10809
CPLX2	0.000238895	-0.91455	9.80732	0.538236	0.00979347	-0.558204
CPM	0.0680551	-189.69	4436.96	0.164083	0.147806	-0.290395
CPN1	0.561807	-0.309445	21.102	0.000669288	0.278508	0.10593
CPN2	0.183496	-1.23978	18.947	0.0759123	0.145381	-0.293423
CPNE1	0.330809	-35.2779	4400.24	0.0222048	0.129562	-0.312236
CPNE2	0.280017	-38.7132	2047.95	0.0364428	0.320674	0.0412303
CPNE3	0.431114	-26.9589	3429.88	0.00659677	0.245449	-0.144417
CPNE4	0.345143	0.445456	6.68192	0.0185897	0.148299	0.289759
CPNE5	0.015837	-35.4839	540.951	0.280272	0.00524711	-0.599956
CPNE7	0.144271	258.224	246.036	0.0963776	0.141124	0.299087
CPNE8	0.280133	-13.2058	1397.7	0.036147	0.177219	-0.25117
CPNE9	0.391854	0.294606	8.29218	0.012265	0.217252	0.190572
CPO	0.342244	-0.760379	25.2129	0.0190084	0.150745	-0.286606
CPOX	0.558517	-6.95214	1135.33	0.00102321	0.244786	0.145532
CPPED1	0.0722096	39.859	934.327	0.157778	0.0172095	0.519502
CPQ	0.306308	-80.2911	3328.65	0.0303896	0.190674	-0.228884
CPS1	0.409291	5.24537	159.368	0.00804994	0.280436	0.102964
CPSF1	0.292728	122.666	4436.57	0.0331044	0.267016	0.119234
CPSF1P1	0.0110729	-8.86185	123.766	0.306771	0.00530424	-0.598619
CPSF2	0.172586	22.4677	920.951	0.0803662	0.119452	0.325831
CPSF3	0.0384851	44.8468	959.395	0.208574	0.0288772	0.478271
CPSF3L	0.0130749	151.269	2883.62	0.292441	0.0644512	0.403165
CPSF4	0.0273282	119.404	323.833	0.237336	0.109667	0.337865
CPSF4L	0.786211	-0.000405223	2.18053	4.63908e-07	0.346227	-0.0242209
CPSF6	0.0353541	-76.6972	2770.56	0.216319	0.14409	-0.295744
CPSF7	0.402431	19.2768	2843.15	0.00860282	0.233433	0.166035
CPT1A	0.238484	-132.406	6154.61	0.0502994	0.191356	-0.227547
CPT1B	0.173359	-2.31016	58.4176	0.0799978	0.0468226	-0.431915
CPT1C	0.561807	0.416204	160.354	0.000611441	0.346227	0.0213952
CPT2	0.00166569	45.3259	165.408	0.432082	0.000417128	0.750391
CPVL	0.338717	-72.1389	2797.17	0.0194737	0.233433	-0.170716
CPXM1	0.0105625	-48.2116	638.337	0.310868	0.0343943	-0.461556
CPXM2	0.0261638	-65.4786	919.543	0.241658	0.0032466	-0.633163
CPZ	0.0785062	1.00942	-2.2173	0.1506	0.0920523	0.361346
CRLS1	0.495964	12.2505	2123.82	0.00186073	0.199952	0.21462
CRYL1	0.482244	49.5833	4296.22	0.00367538	0.233433	-0.166704
CS	0.0630704	88.421	3010.6	0.169545	0.00991606	0.557389
CSAD	0.495964	-9.16328	1307.68	0.0019095	0.211846	-0.1959
CSAG1	0.582983	-0.0075556	1.24978	0.000275438	0.346227	-0.0258051
CSDC2	0.149907	-3.35993	48.0713	0.0937253	0.00824253	-0.570315
CSDE1	0.0420957	571.968	10814.3	0.201928	0.0180517	0.515936
CSE1L	0.120185	76.162	1733.36	0.111708	0.0551468	0.417429
CSF1	0.338717	128.284	2693.18	0.0194717	0.198835	0.216849
CSF1R	0.279307	364.682	4314.06	0.0368786	0.0468226	0.431915
CSF2	0.0923	1.64333	-3.30983	0.136708	0.0679843	0.397627
CSF2RA	0.391942	24.4232	940.097	0.0110598	0.255151	0.13684
CSF2RB	0.161491	62.6463	411.505	0.0866353	0.0404854	0.446179
CSF3	0.271257	0.0993378	0.991146	0.0387568	0.11907	0.32631
CSF3R	0.0480685	320.848	137.293	0.190876	0.00701464	0.581236
CSGALNACT1	0.113671	-26.9638	873.274	0.115371	0.213981	-0.193671
CSGALNACT2	0.583316	2.50763	1465.14	0.000179138	0.2814	-0.0837978
CSK	0.0083471	235.186	1720.29	0.326212	0.0025378	0.646758
CSMD1	0.391942	-0.602785	27.0184	0.0109757	0.179878	-0.246936
CSMD2	0.431114	-1.46726	86.7166	0.00621719	0.457289	0.00378873
CSMD3	0.028555	22.7925	-96.3126	0.232916	0.0841127	0.373416
CSNK1A1	0.495964	9.34207	2027.23	0.00224466	0.241981	0.150881
CSNK1A1L	0.311517	-0.07329	1.98805	0.0289055	0.233118	-0.173719
CSNK1A1P1	0.0654413	-0.42507	7.45625	0.167461	0.0917904	-0.362827
CSNK1D	0.0805198	160.983	4510.32	0.148385	0.233118	0.174727
CSNK1E	0.583316	8.81922	6226.09	0.000206737	0.278508	-0.10497
CSNK1G1	0.00205715	35.9615	463.947	0.419975	0.00335565	0.630489
CSNK1G2	0.0397589	176.554	3187.55	0.205924	0.159438	0.274126
CSNK1G2_AS1	0.389466	-0.546158	19.0847	0.0124799	0.0679843	-0.397148
CSNK1G3	0.000945771	-68.4764	1422.98	0.469759	0.00390532	-0.618454
CSNK2A1	1	-0.0480507	2991.86	1.52769e-08	0.204351	0.208157
CSNK2A2	0.396942	-23.4964	2407.66	0.0102023	0.293579	0.0735459
CSNK2A3	0.271971	0.251311	5.94972	0.0385367	0.157416	0.275909
CSNK2B	0.103058	30.3703	307.276	0.126244	0.125909	0.317808
CSPG4	0.000206873	-1004.86	10962.5	0.550198	0.0070949	-0.580121
CSPG4P11	0.201299	-1.28464	38.4521	0.0675532	0.0716383	-0.391576
CSPG4P12	0.000206873	-2.91348	36.0933	0.549777	0.00156931	-0.671942
CSPG4P13	0.00252556	-9.66488	111.33	0.406475	0.00341055	-0.628706
CSPG4P8	0.325747	-0.462664	13.372	0.0240574	0.123914	-0.321401
CSPG5	0.108103	0.845441	4.0554	0.12004	0.150557	0.286829
CSPP1	0.313359	-55.9206	2384.84	0.0271442	0.151995	-0.284155
CSRNP1	0.00602198	-217.042	3315.65	0.349265	0.00443831	-0.610654
CSRNP2	0.00543778	-37.5119	1120.14	0.356152	0.0327612	-0.466014
CSRNP3	0.0458759	-8.26779	175.875	0.19463	0.0858057	-0.371073
CSRP1	0.201904	-139.126	5528.76	0.0667354	0.226362	-0.182305
CSRP2	0.0281114	-100.973	1661.48	0.234807	0.013773	-0.534657
CSRP2BP	0.391854	-7.59134	561.565	0.0120969	0.310341	0.058391
CSRP3	0.177758	1.69084	-5.04586	0.0783628	0.266896	0.120339
CST2	0.0332766	-1.66014	18.8872	0.221063	0.0351715	-0.458886
CST3	0.439595	235.099	20761.7	0.00525852	0.192317	0.225987
CST6	0.237712	1.7607	8.12749	0.0511789	0.0964222	0.355026
CST7	0.391942	10.0905	425.167	0.0109316	0.244103	0.147315
CSTA	0.327073	16.8756	303.05	0.0237902	0.148299	0.289058
CSTB	0.313359	289.796	6897.71	0.0270932	0.0822962	0.376421
CSTF1	0.0380685	16.7886	676.487	0.209476	0.00665872	0.584801
CSTF2	0.0969653	13.9576	268.329	0.132068	0.0283591	0.479609
CSTF2T	0.187172	-14.8662	1104.28	0.0739282	0.346227	-0.0247382
CSTF3	0.166538	11.6162	755.417	0.0835862	0.235458	0.162024
CSTF3_AS1	0.370505	0.0936572	1.4894	0.0145795	0.272776	0.114362
CTH	0.0236695	11.8835	66.486	0.250277	0.0327612	0.466237
CTHRC1	0.693895	1.61584	1240.58	6.35196e-05	0.556272	-0.000668599
CTPS1	0.0643861	80.304	234.732	0.168391	0.129671	0.311567
CTPS2	0.18948	-12.7896	750.336	0.0731986	0.2814	-0.086695
CYB5R1	0.398473	14.3948	2081.08	0.00966048	0.206522	0.203031
CYB5R2	0.0135353	30.0734	-24.6394	0.289717	0.0143929	0.531314
CYB5R3	0.385131	680.992	21351.1	0.0128706	0.233433	-0.172276
CYB5R4	0.370505	17.0732	773.263	0.0146441	0.211791	0.197237
CYB5RL	0.0712708	6.71665	93.2457	0.159018	0.105396	0.342769
CYC1	0.330432	108.432	6131.6	0.0225305	0.173375	0.257411
CYCS	0.232486	151.134	3209.02	0.0535165	0.204351	0.20994
CYCSP10	0.420117	-0.13583	6.91213	0.00736258	0.15963	-0.273488
CYCSP2	0.042399	-0.162971	2.1989	0.201234	0.0145913	-0.529607
CYCSP24	0.280017	-0.232825	5.54528	0.0364724	0.10236	-0.34771
CYCSP28	0.266652	-0.310317	10.0021	0.0401137	0.190298	-0.229775
CYCSP34	0.0104348	-2.19743	36.0353	0.311605	0.00984552	-0.557835
CYCSP38	0.0498869	-0.328442	4.40479	0.187306	0.00939931	-0.560929
CYCSP40	0.0509613	-1.10852	17.0709	0.185597	0.0090494	-0.562918
CYCSP45	0.126304	0.172298	-0.224209	0.107458	0.0858057	0.371112
CYCSP52	0.618831	-0.0130867	2.44672	0.000109178	0.244103	-0.148159
CYCSP55	0.635374	0.00523831	1.99208	8.55357e-05	0.420848	0.00481039
CYP11A1	0.581935	-0.35822	46.5292	0.000350017	0.293579	0.0742972
CYP17A1	0.0141019	-6.9217	104.82	0.287372	0.0289876	-0.477826
CYP17A1_AS1	0.0308576	-0.338837	3.86982	0.226984	0.0114097	-0.547951
CYP19A1	0.354618	1.05447	12.8392	0.0169421	0.244786	0.145659
CYP1A2	0.689379	-0.00341341	1.0318	6.76257e-05	0.281096	0.094088
CYP1B1	0.738455	-1.018	1082.45	1.02698e-05	0.294351	-0.0695343
CYP1B1_AS1	0.601004	0.271636	47.496	0.000120005	0.358583	-0.0142635
CYP21A2.2	0.0969653	7.94543	5.04898	0.131835	0.0281298	0.4805
CYP24A1	0.398289	205.114	3140.42	0.00976708	0.170809	-0.261422
CYP26A1	0.412436	-0.092446	5.06964	0.00769244	0.230561	-0.177934
CYP26B1	0.379954	-8.8111	297.55	0.0134325	0.320674	-0.0421218
CYP26C1	0.408035	0.101548	1.85621	0.00811194	0.346227	-0.0183357
CYP27A1	0.0166242	-191.249	3365.2	0.275561	0.0435466	-0.438378
CYP27B1	0.0256365	57.736	-208.263	0.243777	0.0987748	0.351906
CYP27C1	0.0921939	4.85456	-12.5647	0.137196	0.0701917	0.393069
CYP2A6	0.108852	-0.863695	16.737	0.119241	0.0214826	-0.502118
CYP2A7	0.323862	0.0785412	1.24919	0.0246229	0.280436	-0.0996758
CYP2B6	0.488204	0.0700226	3.09923	0.00319499	0.221038	0.186822
CYP2C18	0.456229	5.08606	155.286	0.00437046	0.255151	-0.136475
CYP2C19	0.495964	1.73805	70.7044	0.00232951	0.233433	-0.170154
CYP2C8	0.305073	14.8413	252.571	0.0308227	0.280436	0.0980612
CYP2C9	0.495964	10.8641	489.515	0.00256946	0.0900845	-0.364832
CYP2D6	0.119558	-3.64337	90.2906	0.112231	0.0472021	-0.430578
CYP2D7P	0.320333	3.17721	105.976	0.0257351	0.346227	0.0254068
CYP2E1	0.424082	3.74597	138.746	0.00701401	0.240528	-0.153778
CYP2F1	0.103796	0.23285	0.527645	0.125524	0.179878	0.246689
CYP2J2	0.31123	42.6234	296.179	0.0296221	0.318842	0.0530422
CYP2R1	0.0035285	-20.4261	615.758	0.383605	0.00156931	-0.671942
CYP2S1	0.0154031	62.0397	-129.009	0.282205	0.0070849	0.580344
CYP2U1	0.262631	-4.8033	364.484	0.0412792	0.233433	-0.167596
CYP2W1	0.333921	0.440015	9.7703	0.0207695	0.237608	0.160687
CYP39A1	0.246666	-1.6001	42.9633	0.0470557	0.223783	-0.185202
CYP3A4	0.0430098	-0.880378	13.8214	0.200181	0.0281886	-0.480268
CYP3A43	0.0070919	-1.20312	15.0078	0.336952	0.0138686	-0.534211
CYP3A5	0.314661	-90.7855	3262.04	0.0267077	0.0871889	-0.368844
CYP3A7	0.157906	-4.21329	67.9761	0.0882586	0.0252702	-0.48986
CYP46A1	0.0113985	-14.8985	240.766	0.304718	0.0129612	-0.540005
CYP4F2	0.402431	5.62528	67.1064	0.00891588	0.346227	-0.0238573
CYP4F22	0.238804	0.330859	4.04674	0.0501735	0.206522	0.203031
CYP4F23P	0.105587	0.52269	-0.518397	0.122857	0.0545382	0.41939
CYP4F24P	0.437112	-0.0831581	3.38613	0.00540458	0.338176	0.0282706
CYP4F25P	0.00488532	-2.05038	21.317	0.363185	0.0440479	-0.437471
CYP4F29P	0.434393	0.428918	8.95694	0.00588283	0.281384	-0.0934226
CYP4F3	0.313359	278.321	2070.95	0.028135	0.266896	0.120571
CYP4F32P	0.328412	3.02458	13.203	0.0230197	0.145489	0.293118
CYP4F35P	0.00678948	-6.7987	105.243	0.339884	0.0598396	-0.41052
CYP51A1	0.0774074	3.16408	5.63841	0.152284	0.0429751	0.439715
CYP51A1P2	0.100807	-1.28393	25.3317	0.128262	0.0210995	-0.503678
CYP51A1P3	0.326487	-1.34103	45.4129	0.0239529	0.0996716	-0.350792
CYP7A1	0.100418	-0.240479	4.20562	0.128577	0.083256	-0.374805
CYP7B1	0.228558	16.0675	210.073	0.0548453	0.126049	0.317585
CYP8B1	0.583316	5.82645	915.168	0.000246349	0.172779	-0.258302
DAD1	0.10118	-106.145	3679.75	0.127405	0.204351	-0.210832
DAO	0.317284	10.5579	95.9305	0.0263855	0.266896	-0.120361
DBH	0.497545	0.332583	39.4512	0.00179337	0.323661	-0.03343
DBH_AS1	0.240632	5.45043	122.897	0.0493914	0.23898	0.158904
DBT	0.00136107	75.147	619.667	0.446066	0.00197392	0.663473
DCK	0.0271446	31.0096	541.895	0.238175	0.00594688	0.591487
DCT	8.1063e-05	-9.49839	110.083	0.62251	0.00254615	-0.646313
DCTD	0.200092	73.2969	2378.54	0.0687068	0.178416	0.249833
DCTN1	0.206699	65.9145	2724.01	0.0646313	0.172525	0.258971
DCTN1_AS1	0.581935	-0.0177341	3.44343	0.000304733	0.278508	-0.106649
DCTN2	0.439595	18.215	3792.67	0.00526978	0.143172	0.297081
DCTN3	0.0344331	-60.3613	1921.61	0.218293	0.223906	-0.183865
DCTN4	0.0547937	-87.267	2905.5	0.180048	0.150977	-0.285492
DCTN5	0.114977	47.1623	1369.62	0.114725	0.1424	0.29775
DCTN6	0.476848	3.72431	659.549	0.00377783	0.320674	-0.0488077
DCTPP1	0.0162068	75.7693	517.363	0.277518	0.00577242	0.593493
DCXR	0.000458878	121.26	534.028	0.506276	0.00247713	0.648096
DDC	0.267922	152.395	1455.4	0.0396078	0.285515	0.0793404
DDC8	0.402659	-0.901404	27.6865	0.00840303	0.0404854	-0.446179
DDO	0.0457402	-8.67595	300.664	0.194892	0.155709	-0.277692
DDOST	0.0027542	962.302	3564.77	0.398895	0.00197392	0.663473
DEGS1	0.402431	-89.385	7437.76	0.0090309	0.177019	-0.251393
DEGS2	0.236841	3.4685	26.4751	0.0514974	0.233433	0.172944
DERA	0.171927	107.847	1600.75	0.0807856	0.104715	0.343883
DGAT1	0.305504	38.6656	1532.67	0.030562	0.125909	0.31803
DGAT2	0.00303015	39.4661	-53.6764	0.393333	0.00206503	0.66013
DGAT2L6	0.215716	-0.170094	2.74802	0.0594067	0.152882	-0.280335
DGAT2L7P	0.551744	0.24259	16.9608	0.00107737	0.176302	-0.252508
DGKA	0.488204	-8.69693	888.967	0.00318849	0.258074	-0.133051
DGKB	0.130934	-2.48137	39.745	0.104141	0.320674	-0.0445931
DGKD	0.00161872	-197.613	3217.95	0.434858	0.0133711	-0.536662
DGKE	0.00245668	-33.7973	608.461	0.408745	0.00524711	-0.599956
DGKG	0.0280521	19.3248	138.198	0.235494	0.0138686	0.534211
DGKH	0.000311668	-190.659	2440.78	0.525561	0.00665054	-0.585693
DGKI	0.495964	17.1039	941.196	0.00252522	0.173898	-0.256742
DGKK	0.225449	-0.331526	6.17336	0.0561575	0.280436	-0.0950895
DGKQ	0.224583	-24.2809	1133.78	0.0565003	0.0753798	-0.385559
DGKZ	0.109592	278.195	4131.98	0.118238	0.15243	0.281926
DGKZP1	0.490311	0.361932	37.4905	0.00283348	0.253067	-0.138846
DGUOK	0.0962245	24.3926	916.287	0.132613	0.0286992	0.478717
DGUOK_AS1	0.398289	-0.435388	27.4726	0.00982482	0.0650884	-0.401605
DHCR24	0.0478721	834.403	3114.02	0.191607	0.109177	0.338311
DHCR7	0.0145944	47.5203	462.156	0.28538	0.00444048	0.610431
DHDDS	0.022286	63.3708	937.291	0.255402	0.143723	0.296412
DHDH	0.232828	10.1765	53.6737	0.0527255	0.293509	0.0748831
DHFR	0.391854	13.9718	501.033	0.0122283	0.15243	0.282372
DHFRL1	0.561807	1.11495	436.927	0.000494103	0.293579	-0.0746602
DHFRP1	0.200092	-0.578957	14.1792	0.0691455	0.281384	-0.0931582
DHFRP2	0.333921	-0.120189	2.79807	0.0211932	0.231758	-0.176651
DHODH	0.36612	23.2192	890.991	0.0152595	0.233433	-0.166481
DHRS11	0.0330191	42.2328	45.4776	0.221573	0.0684624	0.396034
DHRS3	0.107013	392.886	3768.41	0.121	0.085825	0.370627
DHRS4	0.345143	7.04132	258.451	0.0185845	0.310237	0.0590596
DHRS4_AS1.1	0.364874	4.16655	159.851	0.0158461	0.278508	0.106307
DHRS4L2	0.443472	-3.77604	515.417	0.00464798	0.197515	-0.217963
DHRS9	0.213583	4.62266	21.2806	0.0605026	0.0873081	0.368398
DHTKD1	0.0527626	-274.98	5410.63	0.183309	0.0283591	-0.479831
DLAT	0.43672	10.0359	1137.53	0.00570041	0.18834	0.234455
DLD	0.0930695	186.16	1520.31	0.136157	0.1408	0.299755
DLST	0.298796	22.2878	1750.79	0.0317457	0.294351	0.0706487
DMGDH	0.561807	-7.49539	1420.52	0.000550134	0.15243	-0.282817
DNMT1	0.0230915	201.821	875.828	0.25257	0.0203194	0.507021
DNMT3A	0.583316	-0.585974	807.51	0.00014519	0.300912	-0.0648541
DNMT3B	0.558928	2.19627	328.772	0.00100285	0.320674	0.0381102
DOLK	0.0773787	-16.557	535.419	0.152527	0.277166	-0.111879
DOLPP1	0.412436	2.14907	350.902	0.00773498	0.159055	0.274571
DOT1L	0.582983	1.49979	1371.23	0.000267322	0.475768	0.00156006
DPAGT1	0.0156613	48.6881	861.029	0.281108	0.00864055	0.566972
DPM1	0.539815	-2.70734	1314.23	0.00117935	0.237608	0.160018
DPM2	0.19847	29.8153	1254.69	0.0696661	0.0946336	0.358815
DPM3	0.0012266	87.8008	455.266	0.453711	0.00122214	0.696235
DPYD	0.0923	90.2921	870.597	0.136754	0.0325136	0.467351
DPYD_AS1	0.514849	0.0344518	1.89893	0.00155023	0.323661	-0.0348557
DPYD_AS2	0.258116	-0.142539	3.26465	0.0429953	0.14167	-0.2985
DPYD_IT1	0.483605	-0.0563279	3.18018	0.00364083	0.128737	-0.313811
DPYS	0.302546	142.127	3123.55	0.0311357	0.255949	0.135057
DPYSL2	0.166538	-130.215	4874.26	0.0835499	0.162653	-0.270114
DPYSL3	0.211021	278.749	1838.44	0.0619828	0.232356	0.176064
DPYSL4	0.0602357	-2.47597	44.4298	0.172891	0.079554	-0.38021
DPYSL5	0.490311	-0.208142	9.6207	0.00288906	0.346227	-0.0253235
DSE	0.0921939	141.883	744.22	0.137228	0.0340065	0.463116
DSEL	0.00163663	-147.197	1622.39	0.43407	0.00206503	-0.659907
DTYMK	0.0156002	70.9063	720.357	0.281447	0.0108755	0.551372
DUT	0.290503	-20.9866	2149.16	0.0338414	0.346227	-0.023401
DUTP1	0.786211	0.00116985	3.00609	1.78015e-06	0.266092	-0.122273
DUTP2	0.42436	-0.0752135	3.71218	0.00687011	0.233433	-0.167671
DUTP6	0.313359	-0.358951	19.4337	0.0276727	0.180789	-0.245599
DUTP7	0.364874	-0.116325	4.17926	0.0157537	0.151995	-0.284566
EARS2	0.0358293	79.0042	737.413	0.215019	0.066788	0.399377
EBP	0.100325	31.8668	761.842	0.12885	0.0221072	0.500335
EBPL	0.0333729	-73.6575	1457.27	0.220682	0.237608	-0.160687
ECHDC1	0.43672	25.4762	1437.22	0.00552825	0.192361	0.224872
ECHS1	0.00514486	258.842	3060.97	0.359939	0.00426155	0.613105
ECI1	0.017365	277.231	2427.11	0.272046	0.0139045	0.533542
ECI2	0.0258598	31.4685	662.368	0.243012	0.00828189	0.569647
EHHADH	0.391942	57.7212	2016.5	0.0113253	0.179878	-0.246936
EHMT1	0.164369	-27.9755	1736.78	0.0847745	0.165044	-0.267663
EHMT2	0.0480125	161.64	986.238	0.191065	0.143907	0.296189
EHMT2_AS1	0.245903	0.189769	0.715666	0.0480559	0.320674	0.0376839
ELOVL1	0.040089	143.901	1884.12	0.205105	0.0222507	0.499889
ELOVL2	0.169495	-7.99775	130.962	0.0819962	0.374846	-0.010029
ELOVL2_AS1	0.345385	-0.122803	2.50735	0.0181745	0.318149	-0.0545389
ELOVL3	0.10476	-0.480979	8.29485	0.124578	0.152695	-0.28148
ELOVL4	0.00126084	-3.84854	50.1139	0.452247	0.0138686	-0.534211
ELOVL5	0.239004	69.9556	2272.89	0.0500236	0.13417	0.306887
ELOVL6	0.146251	20.3192	432.056	0.095653	0.14167	0.298641
ELOVL7	0.061819	-96.258	2041.4	0.170967	0.19131	-0.228438
ENGASE	0.142097	-81.0764	3044.27	0.0973302	0.0431336	-0.43927
ENO1	0.0183146	6536.11	35708.6	0.267584	0.0268811	0.484734
ENO1_AS1	0.106427	0.314804	1.62437	0.122146	0.107548	0.340355
ENO1_IT1	0.490311	0.760851	42.9113	0.00285514	0.204351	-0.211054
ENO1P3	0.309229	-0.0981731	2.27652	0.0299745	0.180789	-0.245564
ENO2	0.424777	255.999	9539.85	0.00683326	0.320674	-0.0443504
ENO3	0.0770673	17.1923	211.426	0.152943	0.125598	0.318699
ENO4	0.333921	-0.837852	70.1536	0.0206077	0.192361	-0.224872
ENOPH1	0.20184	41.6384	1378.13	0.0669471	0.0761206	0.384667
ENOSF1	0.0107841	-339.362	6147.31	0.309032	0.0207858	-0.505015
ENPP1	0.0259092	106.245	-263.795	0.242788	0.159841	0.272788
ENPP2	0.213583	-987.032	19166.7	0.060686	0.0674773	-0.398485
ENPP3	0.0109784	-659.151	10214.2	0.307567	0.171871	-0.260531
ENPP4	0.0342056	-69.1012	1600.06	0.219211	0.233433	-0.172499
ENPP6	0.2626	0.724979	12.5405	0.0413383	0.186104	0.239804
ENPP7	0.271257	29.8178	81.715	0.0389297	0.346227	0.0239608
ENPP7P1	0.398473	-0.191226	7.05793	0.00967851	0.112187	-0.334266
ENPP7P10	0.0673247	-0.931849	13.5185	0.165041	0.0141734	-0.532276
ENPP7P11	0.110702	-0.411375	8.82214	0.116926	0.0297985	-0.475151
ENPP7P12	0.400534	0.933228	15.0138	0.00927666	0.257053	-0.133735
ENPP7P4	0.442526	0.633672	31.4712	0.00479739	0.190298	-0.229552
ENPP7P5	0.442526	0.162966	3.58502	0.00486825	0.320674	-0.0424084
ENPP7P6	0.561807	0.0206809	1.61955	0.000634394	0.166996	-0.26613
ENPP7P8	0.122231	-6.31916	77.5398	0.110178	0.0214826	-0.502122
ENTPD1	0.000206873	-242.954	4008.6	0.550555	0.00606183	-0.590596
ENTPD1_AS1	0.130162	-5.14575	157.088	0.104887	0.0465693	-0.432584
ENTPD2	0.201892	31.0564	230.528	0.0668058	0.204351	0.206597
ENTPD3	0.495964	-0.107739	9.61745	0.00203978	0.15243	-0.281926
ENTPD3_AS1	0.420242	0.723437	85.956	0.0072862	0.260298	0.129708
ENTPD4	0.0208731	93.977	905.327	0.259564	0.0255916	0.488969
ENTPD5	0.330809	28.9471	874.217	0.0222016	0.260298	0.131045
ENTPD6	0.581935	7.82611	3099.53	0.000362964	0.232521	0.175396
ENTPD8	0.0673247	7.9304	-10.9879	0.165389	0.045627	0.434367
EOGT	0.017365	-39.6136	962.042	0.272204	0.128073	-0.314687
EPHX1	0.136991	108.346	2199.11	0.100776	0.0835907	0.374416
EPHX2	0.136406	123.737	298.45	0.101341	0.105396	0.342769
ETHE1	0.04459	56.3346	268.845	0.1974	0.123914	0.321373
ETNK1	0.618831	-5.32084	3570.42	9.9846e-05	0.17606	-0.253399
ETNK2	0.238023	55.1139	457.273	0.0507162	0.285446	0.0797862
ETNPPL	0.186644	-0.839539	14.7934	0.0745678	0.18834	-0.236567
EXT1	0.333921	24.9876	1571.92	0.0209897	0.148935	0.287943
EXT2	0.395017	-18.8801	2940.4	0.0104688	0.280436	0.100736
EXTL1	0.149102	2.05055	14.2865	0.0940559	0.109667	0.337865
EXTL2	0.00252556	-26.0077	543.599	0.407023	0.00453848	-0.609094
EXTL3	0.0712708	-37.959	1373.47	0.15894	0.233433	-0.171161
EXTL3_AS1	0.726719	-0.0222011	18.363	4.31582e-05	0.280436	-0.0998442
EZH1	0.402431	20.9623	1680.06	0.00909683	0.281384	-0.0889237
EZH2	0.371079	10.3299	491.983	0.0144422	0.278358	0.106976
FADS1	0.360828	43.5598	1475.24	0.016427	0.0424171	0.441053
FADS2	0.0606896	-168.276	3111.31	0.172307	0.02394	-0.494095
FAH	0.00816864	264.805	2070.54	0.327711	0.00835515	0.568978
FAHD1	0.561807	-17.0342	3692.04	0.000804998	0.19943	-0.21618
FAHD2A	0.182171	21.8616	650.233	0.0766368	0.206522	0.20214
FAHD2B	0.000349179	-42.4109	560.147	0.518681	0.000879603	-0.720081
FAHD2CP	0.0240854	-6.57906	146.972	0.248886	0.0102028	-0.555606
FASN	0.00421473	295.926	622.782	0.372883	0.00143314	0.679743
FBP1	0.0275009	200.542	-492.149	0.236646	0.0114097	0.547806
FBP2	0.693895	0.0131134	4.31222	6.33351e-05	0.114849	-0.331022
FDFT1	0.0357099	77.0246	748.787	0.215415	0.0268299	0.48518
FDPS	0.514849	-3.39763	1108.71	0.00158653	0.198438	-0.217295
FDPSP1	0.211892	0.0779451	0.115076	0.0615988	0.15243	0.282502
FDPSP2	0.109592	-0.29825	5.43444	0.118032	0.0421432	-0.441659
FDPSP3	0.317757	-0.124873	2.78987	0.026266	0.139635	-0.301359
FDPSP4	0.561807	-0.0143606	1.39275	0.000582265	0.281384	0.0924206
FDPSP5	0.561807	0.00889829	0.721884	0.000643054	0.280436	0.103378
FECH	0.431114	7.07318	628.525	0.00655007	0.160474	0.27212
FGGY	0.00177629	129.777	139	0.428076	0.00238946	0.650101
FH	0.0970855	49.6865	1432.59	0.131157	0.0423389	0.441275
FHAD1	0.0114815	33.7395	20.5086	0.303559	0.0320615	0.468465
FHDC1	0.203056	11.2497	82.4855	0.0661854	0.253067	0.139514
FHIT	0.364874	3.47281	229.685	0.0159402	0.283616	0.0815691
FHL1	0.558517	-91.9254	7492.09	0.00101794	0.0648717	-0.402051
FHL2	0.139372	95.3166	1504.67	0.0992533	0.192361	0.224872
FHL3	0.561807	2.85555	550.125	0.000882886	0.240171	0.154446
FHL5	0.0358293	-29.8792	407.524	0.214994	0.0144481	-0.530868
FHOD1	0.138468	-44.9144	1714	0.0996427	0.233433	-0.167596
FHOD3	0.365529	-13.8879	1038.32	0.0155757	0.320674	0.0452419
FIG4	0.495964	-2.18309	675.851	0.00206036	0.2814	0.0862493
FKRP	0.330432	-6.93273	677.25	0.0226213	0.167092	-0.265657
FKTN	0.38505	-6.14505	666.234	0.0129394	0.323661	-0.03499
FLAD1	0.0781019	30.0016	1026.98	0.151357	0.0378355	0.451527
FMO1	0.530946	7.02874	482.062	0.00123454	0.195846	-0.221083
FMO2	0.014062	-114.91	1689.48	0.287758	0.0238942	-0.494318
FMO3	0.225091	-21.123	539.104	0.0563297	0.153718	-0.279697
FMO4	0.288347	7.22944	319.56	0.034689	0.320674	0.0481391
FMO5	0.00324379	-16.2392	250.855	0.388377	0.00139838	-0.680857
FNTA	0.402431	14.0076	1333.21	0.00916022	0.206522	0.202586
FNTAP2	0.323559	0.104176	1.89969	0.0248919	0.310341	0.0583445
FNTB	0.461264	-1.63167	282.349	0.00415926	0.195846	-0.221083
FOLH1	0.00161461	-296.385	3523.54	0.436585	0.00876588	-0.565412
FOLH1B	0.333921	-0.18491	4.09467	0.0210588	0.260161	-0.131927
FPGS	0.00739207	66.7907	1223.24	0.334509	0.00665872	0.584801
FPGT	0.0552433	16.4644	433.295	0.179123	0.0633707	0.405171
FPGT_TNNI3K	0.0328162	-5.64299	84.5666	0.222115	0.0270352	-0.484289
FTCD	0.582983	7.31281	811.14	0.000275915	0.127276	0.316247
FTCDNL1	0.0489513	4.73493	42.7286	0.188958	0.0716383	0.391576
FTH1	0.391942	517.996	24191.2	0.0109406	0.320674	0.0390016
FTH1P1	0.486083	0.0912516	4.87344	0.00331229	0.240528	-0.154001
FTH1P10	0.391854	0.225294	11.5675	0.0119901	0.266896	0.121239
FTH1P11	0.313359	0.424391	10.2987	0.0278913	0.280436	0.0980612
FTH1P12	0.377112	0.223529	8.37266	0.0139422	0.281384	0.0911524
FTH1P15	0.245903	0.182585	2.46485	0.047779	0.206522	0.20272
FTH1P16	0.583316	-0.120185	56.8166	0.000187569	0.280436	-0.0971698
FTH1P19	0.289884	0.148396	1.34498	0.0342343	0.173375	0.257614
FTH1P2	0.0969653	2.58914	31.0915	0.131966	0.0718715	0.391131
FTH1P20	0.313999	-8.9158	301.114	0.0268561	0.124749	-0.319813
FTH1P22	0.442526	0.411948	20.3723	0.00496776	0.285376	0.080009
FTH1P23	0.367145	0.490881	23.2765	0.014871	0.323661	0.03499
FTH1P24	0.245903	-0.119761	2.14753	0.0480205	0.0548788	-0.418093
FTH1P3	0.200092	0.770249	18.94	0.0691366	0.206522	0.201471
FTH1P4	0.253409	0.378183	10.4584	0.0440214	0.230362	0.178293
FTH1P5	0.561807	0.0533613	9.05953	0.00089699	0.346227	-0.0231781
FTH1P7	0.786211	-0.00927178	60.16	4.95157e-07	0.283616	-0.081792
FTH1P8	0.323559	1.23156	45.8807	0.0248843	0.260298	0.131268
FTL	0.391854	3263.13	115391	0.011986	0.192317	0.225987
FTLP12	0.618831	0.00737559	1.97668	0.000104726	0.244103	0.146595
FTLP14	0.738455	-0.0275023	35.5763	9.83998e-06	0.178416	-0.249388
FTLP15	0.561807	0.507932	48.6335	0.000777272	0.129671	-0.311483
FTLP17	0.0480685	0.284541	-0.465915	0.190779	0.0343945	0.460943
FTLP2	0.0998037	1.55524	12.4834	0.129402	0.0327612	0.466459
FTLP3	0.43672	3.55954	208.552	0.00563263	0.266896	0.120794
FTLP5	0.04459	0.390707	-0.632895	0.197333	0.00876588	0.565483
FTLP6	0.618831	0.00682616	1.31926	0.000110403	0.293579	-0.0733455
FUCA1	0.391854	54.9891	2771.3	0.0120373	0.129562	0.312236
FUCA1P1	0.258116	0.511365	8.14472	0.0431165	0.320674	0.0499221
FUCA2	0.137736	93.8577	1421.21	0.100019	0.0645589	0.402942
FUT1	0.0318101	-7.40731	134.074	0.224625	0.164266	-0.268554
FUT10	0.0289093	10.4805	85.0453	0.231568	0.0179146	0.516827
FUT11	0.148087	-120.838	3552.61	0.0946817	0.0902218	-0.364609
FUT2	0.0832999	9.43383	36.9035	0.145328	0.132103	0.308447
FUT3	0.198788	4.4832	9.83046	0.0695299	0.320674	-0.0405617
FUT4	0.246446	7.65455	309.349	0.0474826	0.130743	0.31023
FUT6	0.294879	71.269	519.703	0.0325839	0.253067	-0.139514
FUT7	0.424082	0.826811	36.2612	0.00698011	0.260298	0.130377
FUT8	0.522143	-2.48631	593.872	0.00133553	0.320674	0.0461333
FUT9	0.561807	-0.421281	36.3943	0.000692511	0.374846	0.0109694
FXN	0.402431	-2.17464	219.846	0.00882243	0.374846	0.00980612
G6PC2	5.95895e-05	-2.81649	28.4291	0.634546	0.000547605	-0.738717
G6PC3	0.0227043	118.969	1615.08	0.253906	0.0115325	0.546914
G6PD	0.0168484	393.669	-454.169	0.274517	0.00738735	0.577001
GAA	0.451658	-66.6945	9072.94	0.00447965	0.19943	-0.21618
GAD1	0.204647	31.0779	90.6981	0.0655732	0.199952	0.214397
GAD2	0.0368447	0.256413	0.218064	0.212352	0.0426599	0.440542
GADL1	0.205854	0.129453	0.15361	0.0649334	0.258074	0.132977
GAL3ST1	0.291736	280.74	6386.15	0.033355	0.283616	0.0820148
GALC	0.561807	-5.16814	1596.87	0.000507653	0.242027	-0.149543
GALE	0.200566	246.662	2379.31	0.0681168	0.187725	0.238244
GALK1	0.00166569	151.464	731.67	0.432593	0.00341055	0.628483
GALK2	0.194313	-18.3087	710.408	0.0713914	0.139028	-0.30243
GALM	0.0126847	156.27	1119.56	0.295937	0.0560331	0.415869
GALNS	0.0802529	70.301	1147.74	0.148843	0.15963	0.273903
GALNT1	0.402431	-24.0586	2336.74	0.00897339	0.316776	0.0561623
GALNT10	0.0960888	93.1957	1279.69	0.133205	0.0210995	0.503901
GALNT11	0.328412	-39.1252	3121.16	0.0231818	0.457289	0.0026744
GALNT12	0.581935	-1.6752	367.453	0.000314471	0.346227	-0.0156006
GALNT13	0.000762977	-3.2764	32.5915	0.483744	0.00568699	-0.594591
GALNT14	0.0544391	-381.75	9030.17	0.180584	0.0853103	-0.371741
GALNT15	0.0694217	-43.5066	609.555	0.161741	0.00341055	-0.628483
GALNT16	0.0177576	-16.1845	187.974	0.270301	0.0401031	-0.44707
GALNT18	0.201299	-92.1776	3142.09	0.0674938	0.113095	-0.332517
GALNT2	0.333855	126.446	4432.88	0.0214986	0.147563	0.291286
GALNT3	0.378072	1.44206	63.4062	0.0136089	0.280436	0.0987298
GALNT4	0.0177576	1.90103	5.78232	0.270368	0.0192771	0.510587
GALNT5	0.391942	-1.8897	48.5398	0.0114602	0.0946336	-0.358592
GALNT6	0.582983	0.96297	343.42	0.000277111	0.2814	0.0878094
GALNT7	0.0498465	157.542	-62.7523	0.187631	0.253717	0.137954
GALNT8	0.126031	-0.335481	6.05842	0.107802	0.0987748	-0.351798
GALNT9	0.00141911	-321.363	3203.58	0.442912	0.00640331	-0.587476
GALNTL6	0.10476	0.924329	1.43593	0.12425	0.114849	0.330957
GALT	0.258116	-10.1252	502.507	0.0426452	0.1408	-0.299978
GAMT	0.330432	87.14	2095.22	0.0224393	0.244786	-0.145309
GANAB	0.154771	302.249	10827.7	0.0906502	0.039021	0.448853
GANC	0.290503	-9.58626	695.39	0.0338187	0.0921273	-0.361044
GAPDH	0.396942	1171.48	63372.3	0.0100516	0.374846	-0.0106976
GAPDHP1	0.238023	7.89797	168.869	0.0509502	0.205316	0.204146
GAPDHP14	0.581935	0.247218	27.6059	0.000333963	0.261731	0.125474
GAPDHP2	0.24931	-0.345384	9.34561	0.0452234	0.18834	-0.236016
GAPDHP21	0.313359	0.715009	6.09764	0.0284376	0.228127	0.179774
GAPDHP27	0.122743	-0.227715	3.47545	0.109814	0.0436681	-0.43809
GAPDHP32	0.00205715	-0.912013	11.0501	0.41992	0.00236433	-0.650825
GAPDHP33	0.101464	-0.532761	8.4529	0.127115	0.0197144	-0.508732
GAPDHP38	0.246446	0.298249	5.9183	0.0474658	0.204351	0.208826
GAPDHP39	0.200126	-1.17816	26.9749	0.0683727	0.0316505	-0.470025
GAPDHP40	0.0110729	1.13394	5.27826	0.306705	0.00804664	0.571429
GAPDHP42	0.00260127	-0.764511	10.1695	0.404344	0.00270624	-0.642682
GAPDHP44	0.00741476	0.567228	-0.188235	0.334046	0.00375742	0.621309
GAPDHP45	0.514849	0.0199193	1.06138	0.00158852	0.316776	0.0559896
GAPDHP46	0.258116	-0.115018	2.44791	0.0426488	0.14908	-0.287736
GAPDHP47	0.31123	0.237758	1.67948	0.0293559	0.226759	0.181657
GAPDHP49	0.109965	-0.756539	11.856	0.117339	0.00825556	-0.570058
GAPDHP52	0.0489513	-0.352116	5.09022	0.189002	0.0180518	-0.515271
GAPDHP59	0.157373	-0.360775	6.89317	0.0891292	0.062583	-0.40631
GAPDHP60	0.248428	0.758595	15.7713	0.045636	0.272776	0.114776
GAPDHP61	0.119558	-0.668935	15.0458	0.112176	0.0259659	-0.487855
GAPDHP62	0.320333	0.11858	1.77552	0.0257442	0.280436	0.100558
GAPDHP63	0.0169043	1.48031	9.40356	0.274014	0.0166719	0.521507
GAPDHP65	0.152359	2.22518	27.8076	0.0924336	0.15243	0.282817
GAPDHP69	0.484444	0.0357824	1.26086	0.00351273	0.214757	-0.192243
GAPDHP70	0.495964	0.0668049	5.73913	0.0019037	0.374846	-0.0102519
GAPDHP71	0.173742	0.222073	1.91641	0.0797435	0.192317	0.225346
GAPDHP72	0.103058	0.415206	3.73436	0.126238	0.151995	0.283932
GAPDHP73	0.581935	-0.0101208	1.51662	0.000362989	0.253067	0.138649
GAPDHS	0.226442	-0.110553	1.9427	0.0555819	0.129107	-0.313148
GART	0.0768195	100.574	1085.85	0.153236	0.18834	0.234678
GATM	0.271971	-281.814	8669.34	0.0384684	0.128073	-0.314687
GBA2	0.0480685	-140.741	3311.63	0.190785	0.0343943	-0.461556
GBA3	0.43672	-29.1624	968.542	0.0055797	0.0417799	-0.44239
GBE1	0.336093	40.9762	2058.43	0.01992	0.172525	0.259194
GBGT1	0.561807	-2.4184	410.315	0.000878754	0.343177	-0.0269668
GCAT	0.0701647	47.42	224.827	0.160104	0.0992136	0.351237
GCDH	0.0150401	32.6883	614.758	0.283645	0.0242032	0.492535
GCH1	0.200566	12.129	280.546	0.0681456	0.130819	0.309561
GCK	0.245903	-0.417361	11.787	0.0481453	0.200663	-0.213283
GCKR	0.0242259	15.885	-67.5437	0.248466	0.181631	0.24337
GCLC	0.171822	-28.3325	1277.85	0.081005	0.24142	-0.152886
GCLM	0.177129	43.3803	1307.45	0.0785924	0.162843	0.269891
GCNT1	0.053934	36.4372	44.9112	0.181777	0.127619	0.315579
GCNT1P1	0.333921	-0.254005	6.40465	0.0208472	0.138113	-0.303328
GCNT1P3	0.246712	0.221268	1.20386	0.0465753	0.269161	0.117741
GCNT2	0.0440636	25.8023	528.398	0.19819	0.0118801	0.545354
GCNT3	0.272401	52.9785	541.977	0.0382491	0.150745	0.286383
GCNT4	0.12297	5.21603	-3.99247	0.109483	0.204351	0.208403
GCSH	0.0262347	14.387	117.37	0.241373	0.020922	0.50457
GCSHP4	0.104648	0.20041	-0.0387387	0.124801	0.102577	0.346968
GCSHP5	0.391208	0.135453	6.32735	0.0123255	0.242018	0.150212
GDA	0.0159944	84.1639	823.531	0.279507	0.0260154	0.487632
GDAP1	0.323559	6.39902	225.739	0.0248915	0.171871	0.260308
GDAP1L1	0.377013	-0.936655	33.9832	0.0139819	0.0998186	-0.350569
GDAP2	0.146681	13.5021	355.499	0.0953379	0.115224	0.330065
GDPD1	0.000188278	-15.9276	276.473	0.555457	0.0228759	-0.497884
GDPD3	0.581935	0.715897	231.95	0.000349153	0.277863	-0.10809
GFPT1	0.161765	219.063	2922.07	0.0863241	0.175369	0.255405
GFPT2	0.136991	104.406	837.632	0.100744	0.0960257	0.355695
GGCT	0.345914	22.8787	1014.85	0.0180237	0.249697	0.142189
GGCX	0.495964	8.06635	1911.43	0.00200063	0.237608	0.161132
GGH	0.377408	24.265	573.941	0.0138606	0.0132535	0.537331
GGPS1	0.13632	-27.4435	1315.7	0.101511	0.217282	-0.190105
GGT1	0.291736	142.574	3230.96	0.0334999	0.254805	0.137286
GGT2	0.495964	9.21049	361.332	0.00222066	0.294351	-0.0718429
GGT5	0.00269846	-167.929	2006.19	0.40087	0.0121326	-0.544017
GGT6	0.490311	-0.173453	7.42107	0.002948	0.23905	-0.155908
GGT7	0.0960888	41.6477	853.386	0.133183	0.0564224	0.414977
GK	0.561807	4.21915	822.136	0.000637888	0.323661	0.0343214
GK_AS1	0.402431	-1.34129	42.2362	0.0090037	0.0785396	-0.38177
GK_IT1	0.442526	-0.595947	31.3207	0.0050448	0.204351	-0.207934
GK3P	0.232486	-0.247027	5.79411	0.0535744	0.104715	-0.34459
GK5	0.000836532	-36.365	564.2	0.478313	0.0145596	-0.529976
GKAP1	0.00468843	-37.357	534.366	0.366193	0.0150976	-0.527525
GLA	0.279488	29.7099	863.916	0.0368053	0.0738331	0.388902
GLB1	0.109592	71.1752	1263.21	0.11857	0.0468226	0.431692
GLB1L	0.00607427	177.062	1516.04	0.347776	0.00122214	0.693783
GLB1L2	0.786211	0.685516	1608.79	2.23255e-06	0.195846	-0.221306
GLB1L3	0.582983	-0.0267434	5.81423	0.00025878	0.260298	0.128594
GLCE	0.398289	-14.79	1104.07	0.00991599	0.147988	-0.290172
GLDC	0.495964	-3.81825	823.328	0.00228041	0.293579	0.0728773
GLDCP1	0.313359	-0.0926996	2.63085	0.0284943	0.300912	0.0634353
GLO1	0.336093	-37.3576	2319.13	0.0199308	0.346227	0.0265211
GLS	0.0322964	1137.39	2118.73	0.223607	0.0920523	0.362158
GLS2	0.00638184	-26.583	406.158	0.344043	0.00137587	-0.681748
GLUD1	0.00785776	-352.277	8466.67	0.32984	0.0980116	-0.352575
GLUD1P2	0.0434748	-1.27945	29.5504	0.199308	0.0180517	-0.515713
GLUD1P3	0.0673247	-5.89988	144.137	0.165419	0.00453848	-0.609094
GLUD1P6	0.431114	0.11272	5.31207	0.00661595	0.300912	-0.0635169
GLUD1P8	0.727756	0.0155265	9.67463	1.55099e-05	0.138113	-0.303552
GLUD2	0.495964	-0.575245	79.7804	0.00265522	0.346227	-0.0256296
GLUL	0.738455	-23.1942	26432.7	1.02147e-05	0.244786	0.145977
GLULP4	0.0369673	0.625439	0.916163	0.211945	0.0253186	0.489638
GLYCTK	0.161283	33.0832	588.944	0.086859	0.299183	0.0670828
GLYCTK_AS1	0.100817	-0.499817	8.47972	0.12812	0.035384	-0.458194
GM2A	0.484444	-31.9974	4232.99	0.00347716	0.338176	0.0280812
GM2AP2	0.366151	-0.0534247	1.50338	0.0149555	0.195846	-0.221212
GMDS	0.226185	-10.0637	690.472	0.0558087	0.154711	-0.278806
GMDS_AS1	0.0189696	-14.4678	393.006	0.265486	0.00314815	-0.634946
GMPPA	0.152892	97.2377	2018.65	0.0921192	0.18783	0.237798
GMPPB	0.0790375	0.280645	0.300753	0.150071	0.129596	0.311732
GMPR	0.0673247	36.5595	-18.9922	0.164922	0.013033	0.539337
GMPR2	0.0873347	-72.8244	2289.28	0.141343	0.242018	-0.150212
GMPS	0.136598	73.0317	1098.46	0.10107	0.169092	0.262759
GMPSP1	0.201299	0.295247	3.00693	0.0676737	0.0718715	0.391131
GNE	0.0548078	-59.3181	1385.77	0.179775	0.214757	-0.192779
GNMT	0.738455	0.00709926	20.5198	7.29539e-06	0.283616	-0.0815691
GNPAT	0.18608	27.5918	1885.08	0.0750699	0.0809873	0.378427
GNPDA1	0.00238092	121.093	1359.15	0.41062	0.00135609	0.683531
GNPDA2	0.364557	-6.34508	593.217	0.0160351	0.293438	-0.075106
GNPNAT1	0.561807	-1.09317	262.656	0.000702024	0.277863	0.109205
GNS	0.0837188	689.48	7549.97	0.144574	0.0228759	0.497884
GOT1	0.3206	37.9839	1690.7	0.0255326	0.233433	0.165367
GOT2	0.396942	31.8818	1977.24	0.0101046	0.150977	0.285492
GOT2P3	0.370505	-0.077384	1.8879	0.0145922	0.234147	-0.162794
GPAA1	0.495964	65.5955	6994.08	0.00232811	0.172199	-0.259639
GPAM	0.0316433	8.53137	275.592	0.225127	0.0181076	0.514599
GPAT2	0.0070919	-13.0217	169.339	0.336738	0.00122214	-0.697795
GPCPD1	0.0845868	-108.233	2502.48	0.143326	0.00803396	-0.571652
GPD1	0.24802	132.358	1360.95	0.0461542	0.266896	0.121239
GPD1L	0.217347	7.81882	382.683	0.0586839	0.128214	0.314242
GPD2	0.0186388	200.623	5.70229	0.266596	0.0335485	0.464454
GPHN	0.559928	-1.01944	261.35	0.000955168	0.346227	-0.0229552
GPI	0.00311197	659.505	7376.44	0.391431	0.00100467	0.708492
GPIHBP1	0.00887165	-87.9924	1012.42	0.321736	0.00326521	-0.632718
GPLD1	0.107819	-4.94684	96.2888	0.120294	0.175369	-0.255405
GPT	0.360828	56.6816	890.993	0.0164553	0.2814	-0.0844664
GPT2	0.279488	102.383	1085.71	0.036755	0.232356	0.175619
GPX1	0.280133	404.852	11789.2	0.0362244	0.107548	0.340094
GPX1P1	0.360828	21.5514	717.883	0.0163976	0.233433	0.172499
GPX1P2	1	-1.17317e-05	2.40213	3.86615e-10	0.201932	0.212517
GPX2	0.267063	-0.489381	19.0264	0.0398947	0.204351	-0.208157
GPX3	0.391942	3822.15	86209.8	0.0113222	0.260298	-0.128817
GPX4	0.00488532	1856.44	6348.83	0.363267	0.0114072	0.548251
GPX7	0.273423	-8.05261	310.081	0.0379011	0.148782	-0.288389
GPX8	0.297885	51.281	1107.25	0.032034	0.2814	0.0880322
GRHPR	0.488204	-14.7034	2134.65	0.00318403	0.267016	-0.119234
GSR	0.00816864	274.361	554.217	0.32758	0.00524711	0.599956
GSS	0.0246273	214.026	1358.01	0.247126	0.137767	0.30399
GSTA1	0.333921	-140.242	3085.38	0.021293	0.346227	-0.0260754
GSTA2	0.398473	34.8695	742.086	0.00955841	0.211846	-0.195677
GSTA4	0.0832999	-54.4137	1061.31	0.145375	0.201932	-0.212615
GSTK1	0.0066419	745.458	3442.72	0.341261	0.00236433	0.651439
GSTM2	0.161765	20.9005	507.357	0.0861759	0.260298	0.129485
GSTM3	0.000238895	-68.1734	866.096	0.537882	0.00296905	-0.637398
GSTM3P1	0.343833	0.0813786	0.432141	0.0187223	0.292385	-0.0759314
GSTM4	0.0129099	96.8302	333.672	0.294108	0.0125872	0.541565
GSTM5	0.00741476	-5.41466	57.6393	0.334095	0.0154931	-0.526216
GSTO1	0.108117	146.864	3053.9	0.119908	0.0178806	0.51705
GSTO2	0.214195	-16.9814	469.985	0.0599466	0.318947	-0.0523736
GSTP1	0.0101253	576.066	6279.64	0.313881	0.00665872	0.58547
GSTT1	0.726719	-1.78738	753.488	4.23581e-05	0.307345	0.0597107
GSTT2	0.00526989	-3.62789	60.3769	0.35818	0.124269	-0.320705
GSTT2B	0.0630568	-0.663117	13.4681	0.169698	0.0650884	-0.401605
GSTZ1	0.232486	5.15286	245.024	0.0532658	0.14409	0.295967
GUCY1A2	0.490311	-11.7911	977.504	0.00304572	0.396198	0.00601739
GUCY2C	0.361215	-0.971311	73.8727	0.0163212	0.169486	-0.262314
GUCY2D	0.514849	0.499234	38.2985	0.00158035	0.192317	-0.225987
GUK1	0.246666	454.025	9809.24	0.047334	0.233433	0.166481
GUSB	0.246666	127.11	3217.06	0.0468627	0.18834	0.233564
GUSBP1	0.000162849	-36.5852	593.872	0.58285	0.00111369	-0.702252
GUSBP2	0.103796	-2.78318	91.2363	0.125523	0.0203194	-0.506575
GUSBP3	3.5539e-06	-8.48133	107.31	0.735871	0.000126635	-0.812571
GUSBP4	0.0280521	-1.81852	30.4609	0.23547	0.0139045	-0.533542
GUSBP5	0.0530651	-2.98969	53.9287	0.182811	0.0127404	-0.540897
GUSBP8	0.391942	-0.0506634	1.78868	0.0114308	0.241658	-0.15248
GUSBP9	0.391942	-0.515578	37.7113	0.0112005	0.15963	-0.273903
GXYLT1	0.712538	0.221399	1018.7	5.23006e-05	0.556272	-0.000222866
GXYLT2	0.258116	-8.23177	395.604	0.0429432	0.285515	-0.078449
GYG1	0.495964	-6.7243	1338.9	0.00252508	0.253067	0.139069
GYG2	0.0325466	14.4835	-28.0549	0.222884	0.0920523	0.362158
GYS1	0.442526	-54.5963	4276.66	0.00515052	0.19943	-0.21618
GYS2	0.431114	1.02995	35.4204	0.00624298	0.244786	0.145755
H6PD	0.0327409	1030.55	4267.62	0.222449	0.167092	0.265434
HAAO	0.559928	-10.8436	1448.75	0.000976089	0.18834	-0.236016
HADH	0.411301	9.41223	1109.28	0.00791212	0.272776	-0.114999
HADHA	0.583316	-8.30441	7383.39	0.000220465	0.224342	-0.183196
HADHAP1	0.431114	-2.53214	88.9799	0.00639556	0.124579	-0.320036
HADHB	0.495964	-14.6798	4432.31	0.00270412	0.23905	-0.155115
HAGH	0.306993	123.711	2816.99	0.0302773	0.346227	-0.0173836
HAGHL	0.0823659	67.4039	244.316	0.146496	0.0960257	0.356141
HAL	0.149946	3.41395	15.6694	0.0934856	0.0743103	0.38801
HAO2	0.590843	0.686982	175.062	0.000127381	0.205316	-0.205037
HCCS	0.206699	17.1222	463.519	0.064613	0.0548788	0.41832
HDC	0.431114	-0.832724	48.3411	0.00655416	0.296392	-0.0681971
HDDC2	0.266652	-54.711	1790.36	0.0402503	0.300912	-0.0630712
HDDC3	0.019962	16.1802	191.932	0.26215	0.0101304	0.556052
HEPH	0.000162849	-103.787	1191.45	0.581595	0.000888948	-0.718744
HEPHL1	0.328412	-0.830184	44.1226	0.0230594	0.178416	-0.24961
HEXA	0.0101902	114.233	713.328	0.313408	0.00156931	0.672834
HEXA_AS1	0.738455	-0.0188711	27.9054	1.06682e-05	0.199033	-0.216626
HEXB	0.289884	-126.428	6386.91	0.0342632	0.340216	-0.0274126
HEXDC	0.313359	-28.6752	1883.62	0.0286866	0.121497	-0.323602
HGD	0.000162849	216.897	516.031	0.587834	0.00122214	0.694897
HGSNAT	0.0825544	-90.9685	3620.67	0.146197	0.169092	-0.262759
HIBADH	0.514849	16.7097	2595.94	0.00160542	0.189225	0.232227
HIBCH	0.166538	53.3508	909.885	0.0835409	0.0838514	0.37397
HK1	0.559928	-10.7523	4895.65	0.000969402	0.1857	0.240473
HK2	0.217347	101.157	1970.25	0.0586983	0.15243	0.283486
HK2P1	0.250109	0.108614	0.451885	0.0450483	0.21082	0.198135
HK3	0.161491	99.0614	238.96	0.0866802	0.013033	0.538445
HKDC1	0.130934	239.008	861.131	0.104208	0.217282	0.190328
HLCS	0.460727	-2.93824	853.225	0.00425189	0.323661	-0.0361044
HLCS_IT1	0.0693417	-0.377854	5.53705	0.162055	0.0123204	-0.542986
HMBS	0.00751304	85.5472	147.345	0.332239	0.00218136	0.65701
HMGCL	0.0801279	127.161	1380.96	0.149095	0.091374	0.363495
HMGCLL1	0.288347	-0.314325	5.22795	0.0344884	0.23905	-0.157914
HMGCR	0.208935	-20.3615	828.655	0.0629501	0.300912	-0.0615111
HMGCS1	0.514849	-2.62716	757.782	0.00160535	0.266092	-0.123245
HMGCS2	0.251433	0.865174	0.597268	0.0445238	0.374846	-0.0107649
HMOX1	0.583316	-86.1223	18384.4	0.000195901	0.278508	-0.106753
HMOX2	0.0169043	179.944	1808.91	0.274027	0.038948	0.449076
HNMT	0.161765	213.033	2331.29	0.0861534	0.139028	0.302207
HOGA1	0.00363206	125.192	175.19	0.381635	0.00472962	0.606197
HPD	0.561807	-12.212	1100.28	0.000849963	0.299135	0.0673057
HPDL	0.125692	1.33973	9.67401	0.108093	0.121831	0.323156
HPGD	0.0450302	708.698	-2461.25	0.196224	0.214175	0.193448
HPGDS	0.213583	3.95172	54.6078	0.0605031	0.0753798	0.385782
HPRT1	0.726719	0.366296	965.334	2.43068e-05	0.2814	0.085135
HPSE	0.389466	12.5825	362.247	0.0125075	0.233433	0.166481
HPSE2	0.402431	0.0780078	1.53588	0.00873006	0.204351	0.208204
HS2ST1	0.289884	24.6611	1381.71	0.0340298	0.223783	0.184979
HS3ST1	0.391942	-8.88708	573.87	0.0112457	0.181473	-0.244262
HS3ST2	0.202067	-16.1916	288.763	0.0666353	0.162843	-0.269891
HS3ST3A1	0.0362967	58.8251	-184.932	0.213449	0.112187	0.3343
HS3ST3B1	0.453909	1.54842	117.223	0.00442521	0.260298	0.131045
HS3ST5	0.391854	-0.0472319	1.3084	0.0119023	0.195749	-0.221762
HS6ST1	0.0122541	81.335	652.748	0.29886	0.0316505	0.470248
HS6ST1P1	0.431114	0.11117	6.8725	0.0060776	0.318842	0.0530422
HS6ST2	0.110702	0.769356	-0.438169	0.116882	0.260298	0.131561
HSD11B1	0.287333	-2.36058	69.4366	0.0348943	0.223783	-0.185202
HSD11B1L	0.246666	11.7123	228.438	0.0471627	0.346227	0.0162692
HSD11B2	0.14041	-69.5937	956.598	0.0986257	0.0412344	-0.443727
HSD17B1	0.473167	-0.529369	77.2951	0.0038617	0.294351	-0.0704258
HSD17B10	0.100325	84.9619	1876.44	0.128968	0.0825394	0.375976
HSD17B11	0.391942	-18.7543	1910.94	0.0110705	0.244103	-0.148206
HSD17B12	0.141509	-55.1182	2415.66	0.0977576	0.15243	-0.28304
HSD17B13	0.236122	-0.856969	20.7768	0.0517325	0.114902	-0.330511
HSD17B14	0.0353541	213.287	588.907	0.216343	0.0100585	0.556497
HSD17B1P1	0.0409655	-2.73877	59.8924	0.203747	0.0234552	-0.495878
HSD17B2	0.200092	-3.09301	73.9275	0.0689758	0.0958824	-0.356363
HSD17B3	0.267063	2.9003	34.2874	0.03986	0.346227	0.0173836
HSD17B4	0.561807	-7.60185	4014.75	0.000711862	0.318149	-0.0539337
HSD17B6	0.406279	0.574966	22.1977	0.00824475	0.23905	0.158235
HSD17B7	0.3003	-17.1313	812.726	0.0314415	0.277863	-0.109427
HSD17B7P2	0.0255244	-13.3982	266.548	0.244465	0.00529911	-0.598842
HSD17B8.1	0.255822	13.1253	494.248	0.0435765	0.294351	0.0708715
HSD3B2	0.0832999	-1.54738	25.0121	0.145102	0.0462256	-0.433222
HSD3B7	0.213583	598.524	5465.33	0.0607174	0.15963	0.273457
HYAL1	0.157758	-66.2172	1170.1	0.0885728	0.0490308	-0.427904
HYAL2	0.023272	-219.262	3520.74	0.252044	0.0226421	-0.498775
HYAL3	0.246666	1.69246	33.9907	0.0471998	0.18834	0.232895
HYAL4	0.315743	4.8006	36.3687	0.0265709	0.233433	0.167782
HYI	0.0281114	74.647	311.478	0.234704	0.0821676	0.376867
HYI_AS1	0.211941	0.728052	13.7927	0.0614034	0.233433	0.171607
HYKK	0.297885	-1.20712	78.8625	0.0319903	0.280436	-0.0998442
ICMT	0.0322964	150.706	2040.21	0.223639	0.013009	0.53956
IDH1	0.00839372	440.786	1093.34	0.32573	0.00524711	0.599956
IDH1_AS1	0.003049	1.82126	2.6476	0.392543	0.00223301	0.654336
IDH2	0.0499287	534.922	4507.46	0.18716	0.0325136	0.467351
IDH3A	0.10476	26.5119	322.142	0.124117	0.0866385	0.369513
IDH3B	0.320333	-43.1435	2963.47	0.0256979	0.294351	0.0715401
IDH3G	0.126428	34.6828	1561.74	0.107179	0.0752978	0.38645
IDI1	0.345914	-6.53695	844.435	0.0180192	0.346227	-0.0205037
IDNK	0.127628	-22.5587	447.276	0.106317	0.007075	-0.580567
IDO1	0.726719	0.884729	711.466	1.84951e-05	0.261731	-0.125697
IDO2	0.495964	0.0827332	8.89599	0.00220951	0.475768	-0.00111433
IDS	0.187172	-118.339	5461.42	0.074134	0.19824	-0.217518
IDS.1	0.484444	-0.365508	24.8211	0.00360567	0.0946336	-0.358369
IDSP1	0.726719	0.0100482	5.96238	4.7125e-05	0.217282	-0.190328
IDUA	0.343833	-25.4983	1662.3	0.0188419	0.177219	-0.25117
IL4I1	0.495964	7.87633	568.164	0.00211047	0.23905	0.156898
IMPA1	0.313359	-11.0936	1260.91	0.0273836	0.310237	-0.0588367
IMPA1P	0.561807	0.0304831	2.99786	0.000772541	0.199952	-0.213744
IMPA2	0.337824	80.0961	2952	0.0195714	0.277166	0.11121
IMPDH1	0.0308889	156.499	996.715	0.226813	0.0165598	0.521953
IMPDH1P10	0.551744	0.106013	11.8316	0.00109171	0.22692	-0.180745
IMPDH1P11	0.286218	0.0775671	0.445945	0.0350665	0.457289	-0.00287892
IMPDH1P6	0.522143	-0.0501244	3.0188	0.00133399	0.210076	0.198575
IMPDH2	0.36612	26.6983	2602.95	0.0150879	0.156412	0.2768
INMT	0.166538	-23.3374	324.029	0.0835468	0.00665872	-0.585247
INPP1	0.354038	25.465	739.037	0.0170513	0.205316	0.204814
INPP4A	0.391208	14.1475	1009.73	0.0123568	0.233433	0.164921
INPP4B	0.0673247	-70.3414	1331.76	0.165329	0.0240173	-0.493203
INPP5A	0.726719	0.440341	615.511	3.76402e-05	0.281384	0.0913752
INPP5B	0.0898276	20.9228	516.196	0.139197	0.18783	0.237798
INPP5D	0.345289	55.4222	1973.6	0.0182201	0.277863	0.109427
INPP5E	0.381773	-8.4867	882.978	0.0133198	0.346227	-0.0205037
INPP5F	0.331783	-8.67686	699.615	0.0219262	0.277863	-0.107644
INPP5J	0.00405851	12.1826	5.16915	0.376063	0.00520129	0.600848
INPP5K	0.391942	-15.1511	1538.57	0.0112027	0.334957	0.0287498
INPPL1	0.182742	128.027	4858.22	0.0762498	0.260298	0.129931
IPMK	0.169495	26.2519	576.569	0.0821457	0.204351	0.207934
IPMKP1	0.0701277	0.276653	0.794192	0.160323	0.131721	0.308791
IPPK	0.324634	1.1708	73.3326	0.0242591	0.237608	0.160464
ISYNA1	0.130934	142.791	985.694	0.104093	0.0946336	0.358815
ITPA	0.559928	5.44853	1783.04	0.000978909	0.194061	0.223089
ITPK1	0.105521	105.869	2686.54	0.123037	0.115812	0.329397
ITPK1_AS1	0.231526	-0.447612	11.4632	0.0538154	0.127619	-0.315579
ITPKA	0.3003	23.755	404.222	0.0314507	0.23905	0.156452
ITPKB	0.0031439	-76.1173	1387.94	0.390744	0.00846256	-0.568309
ITPKB_IT1	0.352035	-0.0916663	3.1317	0.0172401	0.23905	-0.157736
ITPKC	0.215716	72.8047	2245.84	0.0593928	0.141812	0.298195
IVD	0.0596896	89.2025	2731.17	0.173833	0.0679843	0.397594
JMJD7_PLA2G4B	0.266652	-5.9196	189.612	0.0400099	0.0581659	-0.412749
KDSR	0.00683856	-171.198	3950.4	0.339365	0.116032	-0.328951
KHK	0.396942	83.8894	2095.9	0.0100957	0.233433	-0.166927
KL	0.0549597	-139.395	2111.43	0.179487	0.0078944	-0.57299
KLB	0.738455	0.00313884	8.24542	3.71009e-06	0.293579	-0.0744374
KLC1	0.174874	-25.3345	897.192	0.0793097	0.0412344	-0.443504
KLC2	0.00269846	51.4724	682.985	0.401125	0.00802137	0.571875
KLC3	0.0378543	9.39245	-19.357	0.210083	0.0057148	0.594228
KLC4	0.514849	8.65538	1431.35	0.00152614	0.240171	-0.154446
KLF1	0.351605	-0.223987	6.51426	0.017391	0.323661	0.0350681
KLF10	0.561807	-16.8003	2463.22	0.00091802	0.15965	-0.273011
KLF11	0.171822	32.6983	659.615	0.0810978	0.199754	0.215066
KLF12	0.171822	-32.4194	1094.8	0.0810102	0.18834	-0.236907
KLF13	0.10476	-72.5863	4561.51	0.124328	0.14167	-0.298641
KLF15	0.246666	-56.0065	1705.17	0.0467685	0.150837	-0.285938
KLF16	0.0696511	89.1204	888.858	0.161152	0.129107	0.31335
KLF17	0.0264032	1.60226	-5.48335	0.240821	0.0342044	0.462321
KLF17P1	0.495964	0.140005	8.8289	0.00197265	0.211791	-0.197014
KLF2	0.136991	-214.838	3722.37	0.100728	0.0210995	-0.503455
KLF2P2	0.509955	0.0393725	3.47765	0.0016776	0.346227	0.0198794
KLF3	0.402431	-10.4652	1364.19	0.00888111	0.261569	-0.12592
KLF3P1	0.333855	-0.225718	5.88211	0.0215102	0.0649764	-0.401832
KLF4	0.0921939	-118.118	2377.56	0.137256	0.104109	-0.345666
KLF5	0.0461897	-47.3756	811.145	0.19386	0.00431842	-0.612437
KLF6	0.0256365	-1950.97	36538.2	0.243832	0.0168659	-0.520839
KLF7	0.00267963	-292.097	4661.33	0.402266	0.00426001	-0.613328
KLF7_IT1	0.0773511	-1.5774	27.1112	0.152662	0.0297675	-0.475597
KLF8	0.01736	-73.0755	1357.81	0.272458	0.00519699	-0.601071
KLF9	0.00152853	-768.992	9383.18	0.439678	0.0169305	-0.520393
KLHDC1	0.000883407	-22.3429	348.573	0.474953	0.00122214	-0.691332
KLHDC10	0.313359	-46.3969	4042.67	0.0278557	0.204351	-0.209272
KLHDC2	0.224583	-61.0768	2486.61	0.0565429	0.104109	-0.345666
KLHDC3	0.561807	-5.50259	2342.33	0.000748477	0.320674	0.0510364
KLHDC4	0.215716	52.8582	1363.13	0.0593263	0.241981	0.151103
KLHDC7A	0.201299	61.048	755.75	0.067563	0.233433	0.17183
KLHDC7B	0.351605	164.921	1964.41	0.0173796	0.277166	0.11121
KLHDC8A	0.000162849	-34.9218	350.623	0.580992	0.00785825	-0.573658
KLHDC8B	0.00251504	-60.754	1282.17	0.407493	0.00846256	-0.568309
KLHDC9	0.0823659	18.4377	207.478	0.14643	0.140294	0.30087
KLHL10	0.140783	-1.30172	15.0318	0.0981944	0.211839	-0.196337
KLHL11	0.13632	1.20763	24.0628	0.101556	0.112187	0.3343
KLHL12	0.04006	43.4001	1248.06	0.205356	0.0283591	0.479831
KLHL13	0.149907	18.4421	138.63	0.0937255	0.175369	0.254291
KLHL14	0.0622375	21.8157	-69.7626	0.170522	0.209837	0.199465
KLHL15	0.170204	-5.67047	317.282	0.0815986	0.19131	-0.227992
KLHL17	0.0828725	26.7741	491.391	0.145819	0.18834	0.234901
KLHL18	0.561807	-0.79761	381.933	0.000694429	0.285515	0.0791176
KLHL2	0.141661	52.6774	586.992	0.0976298	0.205316	0.204814
KLHL20	0.000203911	-31.3324	915.643	0.551979	0.00129332	-0.685314
KLHL21	0.017365	196.058	1068.17	0.272299	0.105091	0.343214
KLHL22	0.267063	-12.2597	930.709	0.039808	0.0873081	-0.368398
KLHL22_IT1	0.236122	-0.658252	17.7959	0.0516802	0.195846	-0.220861
KLHL23	0.00252556	-65.918	865.633	0.406977	0.00722478	-0.578338
KLHL24	0.0592164	-58.5457	2321.7	0.174565	0.0305258	-0.473145
KLHL25	0.333921	-3.65731	244.609	0.0211936	0.147563	-0.291509
KLHL26	0.398473	1.95783	349.63	0.00957263	0.15533	0.27836
KLHL28	0.000219685	-32.7604	645.031	0.543318	0.00222384	-0.654782
KLHL29	0.495964	-2.4027	614.597	0.00236698	0.277863	-0.109205
KLHL2P1	0.561807	0.510143	54.7483	0.000672236	0.160474	-0.27212
KLHL3	0.258116	-7.80838	256.322	0.0421689	0.0377645	-0.45175
KLHL30	0.0480125	-2.43814	44.1229	0.191253	0.0180725	-0.514821
KLHL31	0.0332766	-6.26537	117.445	0.22096	0.0454614	-0.434812
KLHL32	0.00324379	-13.9221	173.918	0.388789	0.180789	-0.245599
KLHL33	0.248497	-0.202161	4.41853	0.0454542	0.171871	-0.260442
KLHL34	0.313359	0.0980134	0.79692	0.0273807	0.151995	0.284519
KLHL35	0.495964	-1.36627	99.1184	0.00222062	0.0785396	-0.38177
KLHL36	0.280133	-34.2498	3245.53	0.0363122	0.189701	-0.230667
KLHL38	0.166538	-0.380466	7.239	0.0836674	0.138264	-0.303101
KLHL4	0.0303221	178.229	-639.989	0.22834	0.181522	0.243732
KLHL41	0.10982	-0.399128	10.0567	0.117554	0.186104	-0.240027
KLHL42	0.490311	-3.8977	907.75	0.00294429	0.112799	-0.333185
KLHL5	0.0121079	-63.4334	1549.71	0.300082	0.0832008	-0.375084
KLHL6	0.561807	-3.63639	702.777	0.000525502	0.260298	-0.129708
KLHL6_AS1	0.305073	3.77385	24.9854	0.0306966	0.457289	-0.00356586
KLHL7	0.00237587	-54.5088	1068.3	0.411013	0.147705	-0.291064
KLHL7_AS1	0.0055089	-4.43588	66.7253	0.354791	0.1848	-0.241141
KLHL8	0.0493418	26.4707	944.908	0.188388	0.0771383	0.383553
KLHL9	0.030126	-71.3176	1635.22	0.228862	0.25091	-0.140852
KLK1	0.0375758	2.1594	-7.82627	0.210681	0.0690068	0.394994
KLK10	0.0951218	0.366204	-0.0289609	0.134349	0.115812	0.329344
KLK11	0.330432	0.959706	-1.92639	0.0226536	0.11108	0.335858
KLK13	0.0838215	0.763345	-1.24238	0.144421	0.0893692	0.365736
KLK14	0.0970855	0.546897	5.2564	0.131124	0.0784151	0.381993
KLKB1	0.385836	4.90579	122.552	0.0128077	0.346227	-0.0218409
KLLN	0.0255244	4.45644	33.41	0.244239	0.0196088	0.50925
KLRAP1	0.0969653	-22.4147	428.418	0.131533	0.00686512	-0.582573
KLRB1	0.0896185	-7.32488	246.582	0.139404	0.0277568	-0.481837
KLRC1	0.126304	-3.1701	75.2805	0.107418	0.0387301	-0.449744
KLRC2	0.0160589	4.26185	-9.36495	0.278853	0.0319399	0.468911
KLRC3	0.43672	-0.0754061	4.01296	0.00574225	0.280436	-0.0949296
KLRC4	0.20155	0.532889	2.23483	0.0670744	0.1737	0.256964
KLRC4_KLRK1	0.251433	0.574775	7.02139	0.0444373	0.266896	0.120696
KLRD1	0.340913	-2.55531	150.897	0.0191314	0.300912	-0.0637398
KLRF1	0.0391114	-3.80697	67.2736	0.207567	0.0342044	-0.462225
KLRF2	0.726719	0.0230226	10.7463	4.25317e-05	0.175369	-0.255182
KLRG1	0.321888	-1.43161	88.7045	0.0252238	0.199952	-0.214843
KLRG2	0.402431	1.23702	13.8719	0.00892859	0.281384	0.0898037
KLRK1	0.215438	1.81046	15.2145	0.059522	0.181522	0.243816
KMO	0.010864	-107.713	1530.89	0.308517	0.00523797	-0.600402
KMT2A	0.206699	32.2143	2661.01	0.064476	0.233433	0.172499
KMT2B	0.345143	0.713385	24.0179	0.0183995	0.300912	0.0641855
KMT2C	0.127628	-47.4085	3410.74	0.106558	0.00775782	-0.574327
KMT2D	0.460727	16.3439	2996.78	0.00428551	0.2814	-0.0880322
KMT2E	0.0363946	-155.474	6039.71	0.2132	0.151995	-0.2846
KMT2E_AS1	0.36612	-10.8477	571.944	0.01538	0.178599	-0.24805
KYNU	0.333921	20.293	351.029	0.0207675	0.147806	0.290841
L2HGDH	0.0600299	-17.3348	365.837	0.173366	0.171871	-0.260308
L3HYPDH	0.313359	6.25488	375.024	0.0272265	0.177337	0.250725
LACC1	0.0011413	-56.691	1030.72	0.458203	0.00287083	-0.638958
LANCL1	0.232486	-29.8417	1974.9	0.0533292	0.285515	-0.0788947
LAP3	0.176615	123.076	2468.38	0.0787934	0.0842289	0.373078
LAP3P2	0.0208921	0.291623	-0.15595	0.25938	0.0180312	0.51639
LBR	0.0960888	110.912	1357.97	0.133274	0.175369	0.255405
LCAT	0.245903	-28.0398	896.227	0.0480986	0.0753798	-0.385782
LCLAT1	0.0781019	-12.0668	485.107	0.151421	0.129389	-0.312459
LCT	0.43672	0.0561158	2.25799	0.00560147	0.226759	0.181818
LCTL	0.2194	0.518889	5.90473	0.0578455	0.18834	0.236907
LDHA	0.333921	-1741.1	74421.8	0.0204559	0.144517	-0.294407
LDHAL6A	0.0447079	-1.31313	25.6534	0.196708	0.0340601	-0.462671
LDHAL6B	0.0133302	-1.84504	28.4003	0.290592	0.00135609	-0.683531
LDHAL6EP	0.6515	0.0207707	6.02362	7.90106e-05	0.18834	-0.236279
LDHAL6FP	0.157373	-0.204258	3.07051	0.0891214	0.0678631	-0.398002
LDHAP2	0.328412	0.120916	2.42949	0.0234215	0.212607	0.194649
LDHAP3	0.217347	0.574252	5.93061	0.0587244	0.112958	0.332962
LDHAP4	0.494869	-0.827749	84.3289	0.00276051	0.250737	0.141074
LDHAP5	0.726719	-0.0113656	7.941	4.34383e-05	0.329418	-0.0294184
LDHAP7	0.410106	-0.173887	10.0843	0.00800014	0.323661	0.0312013
LDHB	0.0192528	1273.6	9207.82	0.264464	0.0210995	0.503678
LDHBP1	0.284537	0.0726088	0.488537	0.0353531	0.228921	0.179241
LDHBP2	0.0916493	0.339286	1.07826	0.137645	0.0809873	0.378403
LDHC	0.313359	1.81966	19.4646	0.0285291	0.18834	0.23679
LDHD	0.0142033	42.818	61.0152	0.286821	0.0548788	0.41832
LFNG	0.398289	6.22236	432.974	0.00996066	0.23905	0.157789
LHPP	0.0543235	52.6811	640.956	0.180968	0.152882	0.280812
LIAS	0.000859507	-36.6245	705.581	0.476802	0.0266773	-0.485849
LIPA	0.231295	-260.464	7794.16	0.0540098	0.204351	-0.207489
LIPC	0.0267044	227.62	-516.291	0.240132	0.0369999	0.454425
LIPG	0.583316	0.786864	137.651	0.000243475	0.247034	-0.143749
LIPT1	0.495964	-1.07493	207.787	0.002601	0.300912	0.0615111
LIPT1P1	0.00236286	-0.596851	6.75341	0.411543	0.000926943	-0.7157
LIPT2	0.258116	1.38059	49.5437	0.0423354	0.2814	0.0878094
LPCAT1	0.331783	543.9	12423.2	0.0219824	0.320674	0.0414532
LPCAT2	0.391942	13.8924	850.285	0.0109666	0.233433	0.167373
LPCAT3	0.228558	202.448	1958.65	0.054827	0.136048	0.305327
LPCAT4	0.023508	71.6655	573.647	0.250882	0.0177616	0.517496
LPGAT1	0.495964	21.6505	3355.21	0.00255541	0.244614	-0.1462
LPIN1	0.0899105	43.8424	630.933	0.139061	0.233433	0.166704
LPIN2	0.00607427	171.308	1308.22	0.347901	0.00323235	0.633832
LPIN3	0.561807	29.0322	3685.62	0.00079053	0.205316	-0.20526
LPL	0.00166569	-69.8304	974.892	0.432255	0.00275456	-0.64141
LRAT	0.0317822	18.3239	94.2093	0.224788	0.148299	0.289058
LRTOMT	0.283785	7.74649	303.094	0.0354877	0.300872	0.065077
LSS	0.188612	-27.4855	1346.67	0.0735104	0.0532288	-0.421218
LTA4H	0.431114	-18.0107	3034.48	0.0062576	0.327088	-0.030087
LTC4S	0.417666	-0.0602251	2.29155	0.00748887	0.175662	-0.253754
LYPLA1	0.258116	63.0072	2186.28	0.0428653	0.0745498	0.387565
LYPLA1P3	0.581935	0.0126413	2.72213	0.000332303	0.178451	0.248661
LYPLA2	0.00514486	158.204	1803.82	0.360119	0.0135579	0.535771
LYPLA2P1.2	0.333921	0.0771529	1.99634	0.0212326	0.186104	0.239911
MAGT1	0.495964	-30.6086	5986.33	0.00262554	0.281384	-0.0922667
MAN1A1	0.207099	-112.962	3770.15	0.0641597	0.0842289	-0.373078
MAN1A2	0.514849	-11.3417	3742.14	0.00155352	0.241658	-0.152441
MAN1B1	0.381773	42.5952	4363.89	0.0133177	0.323661	0.0318699
MAN1C1	0.266652	19.0312	274.948	0.0402729	0.1424	0.29775
MAN2A1	0.0369673	-162.256	3624.45	0.212025	0.209837	-0.199688
MAN2A2	0.0177576	136.804	1873.32	0.270501	0.0228759	0.497884
MAN2B1	0.030126	306.907	1626.91	0.228906	0.0162924	0.523513
MAN2B2	0.0129099	115	1565.92	0.294461	0.0252371	0.490306
MAN2C1	0.245903	-111.699	6405.87	0.047784	0.147806	-0.290618
MANBA	0.0283377	112.511	1464.64	0.2336	0.0135579	0.535771
MANBAL	0.271257	50.5224	1770.56	0.0388715	0.221008	0.186985
MAOA	0.442526	-151.097	9422.72	0.00478275	0.192317	-0.225764
MAOB	0.726719	-4.43486	4091.29	2.70619e-05	0.178451	-0.248719
MARS2	0.106907	13.5317	91.9871	0.121216	0.233433	0.169156
MAT1A	0.0195866	112.249	-248.113	0.263491	0.00640331	0.587476
MAT2A	0.583316	15.3193	5976.75	0.000243513	0.347806	-0.0151549
MAT2B	0.424082	20.8388	3173.85	0.00703074	0.457289	-0.00222866
MBOAT1	0.0285105	17.5254	230.58	0.233117	0.0203194	0.506798
MBOAT2	0.258116	20.2561	412.571	0.0431508	0.280436	0.0944954
MBOAT7	0.109592	141.786	2290.77	0.118435	0.0645589	0.402942
MCAT	0.0372657	40.8032	592.795	0.211212	0.0224967	0.499221
MCCC1	0.00697287	46.368	666.111	0.338187	0.00880725	0.564521
MCCC1_AS1	0.412194	0.632352	19.1132	0.00780019	0.281384	-0.0898152
MCCC2	0.200092	-71.0868	2603.51	0.0689203	0.266896	-0.119902
MCEE	0.331783	-3.25504	437.034	0.0220392	0.0957738	-0.356809
MDH1	0.100981	89.5644	2894.31	0.127953	0.0275463	0.482952
MDH1B	0.00405851	-11.311	199.601	0.376099	0.00443625	-0.610877
MDH2	0.0270894	479.926	2222.42	0.238403	0.0145316	0.530199
ME1	0.189885	35.8495	332.923	0.0730101	0.18115	0.24493
ME2	0.152151	89.3862	982.553	0.092573	0.14409	0.295967
ME3	0.581935	2.29918	1082.73	0.000326662	0.23905	-0.158012
MECOM	0.313359	-26.882	1169.26	0.028695	0.358583	0.0138177
MECR	0.00482697	51.3263	433.893	0.364244	0.0309012	0.472254
MFNG	0.561807	-1.22975	804.736	0.000632755	0.320674	0.0396702
MGAM	0.140446	-97.5036	1407.43	0.0985012	0.0300393	-0.474483
MGAT1	0.431114	95.0779	9853.94	0.00645686	0.281384	-0.0909295
MGAT2	0.0116334	2.13944	7.13762	0.302278	0.00341055	0.628706
MGAT3	0.511889	-45.4956	4474.92	0.00164149	0.166343	-0.266771
MGAT4A	0.420971	-25.1467	2659.74	0.00718273	0.206522	-0.201248
MGAT4B	0.0345692	592.428	4334.17	0.217978	0.0619675	0.4074
MGAT5	0.391854	9.75875	1746.94	0.011715	0.221008	0.187876
MGAT5B	0.0969653	7.84184	-20.2929	0.131789	0.211829	0.196568
MGLL	0.434393	-200.069	15967.9	0.0058422	0.233433	-0.164475
MGST1	0.290972	450.101	8534.4	0.03364	0.157036	0.276354
MGST2	0.0768195	-66.1218	1827.54	0.153322	0.0374987	-0.453087
MGST3	0.235148	-76.9003	4320.58	0.0521302	0.260757	-0.127034
MIF	0.333921	0.535142	28.5756	0.0207525	0.320674	0.051705
MIF4GD	0.561807	1.05441	753.575	0.000479699	0.281384	0.0931582
MINPP1	0.200092	-23.2322	1101.48	0.0691723	0.211846	-0.195454
MIOX	0.420242	80.0018	2005.34	0.00723089	0.201932	-0.212392
MLYCD	0.25648	49.6985	654.198	0.0434306	0.294351	-0.0715401
MMAB	0.520318	5.90534	1209.16	0.00138697	0.320674	-0.0476934
MOCOS	0.0109784	99.6748	-14.1788	0.307859	0.0180312	0.516159
MOCS1	0.013004	-139.144	1955.37	0.29317	0.17606	-0.253399
MOCS2	0.0130688	-113.272	2421.83	0.29262	0.102546	-0.347226
MOGAT1	0.172272	-0.910966	18.5503	0.0805526	0.0470427	-0.431058
MOGAT2	0.106907	1.37782	-3.32079	0.121185	0.0428939	0.440058
MOGAT3	0.375119	38.6423	473.614	0.0141737	0.195846	-0.221083
MOGS	0.000238895	141.371	2321.49	0.53782	0.00135609	0.683086
MPI	0.364874	31.2503	1885.02	0.0157984	0.320674	-0.0508135
MPO	0.165386	1.65691	5.68786	0.0842018	0.0277568	0.481614
MPPE1	0.396942	5.56918	703.936	0.0102904	0.206522	0.203031
MPST	0.0498176	309.444	2695.81	0.187795	0.144517	0.294407
MRI1	0.323965	-5.88797	728.314	0.024412	0.233433	-0.16403
MSMO1	0.402431	-20.8833	1742.87	0.00849793	0.199952	-0.21462
MTAP	0.228558	16.7974	513.684	0.0548668	0.195572	0.221975
MTAPP1	0.258116	-0.122077	2.56038	0.0431531	0.158711	-0.274872
MTAPP2	0.000915621	-3.9931	43.954	0.472435	0.000177713	-0.790061
MTHFD1	0.0452059	62.3594	906.084	0.195703	0.0181076	0.514599
MTHFD1L	0.786211	0.185478	1297.21	1.47214e-06	0.300912	0.0639627
MTHFD1P1	0.108103	0.510546	1.45937	0.12008	0.0960257	0.355695
MTHFD2	0.411301	-13.7697	971.502	0.00791278	0.280436	0.0996213
MTHFD2L	0.106722	-9.80494	388.491	0.121802	0.124749	-0.31959
MTHFD2P1	0.561807	-1.40193	254.334	0.000486177	0.285233	-0.0804548
MTHFR	0.000219589	104.879	727.271	0.545027	0.00335565	0.631158
MTHFS	0.0369673	9.58161	67.5471	0.211833	0.00390491	0.618677
MTHFSD	0.265741	15.4331	714.939	0.0406612	0.374846	-0.00846892
MTM1	0.313359	6.79076	464.995	0.0279772	0.318149	0.0548251
MTMR1	0.0011413	51.9573	651.556	0.459382	0.00146263	0.676177
MTMR10	0.313359	20.4059	1658.5	0.0283834	0.346227	0.0207266
MTMR11	0.211021	-95.7511	2717.53	0.0619762	0.0376226	-0.452196
MTMR12	0.153046	-38.6427	1564.79	0.091775	0.189464	-0.231781
MTMR14	0.0430098	46.2895	1100.95	0.200103	0.013033	0.539114
MTMR2	0.0029008	-77.8855	1886.9	0.395943	0.0309012	-0.472031
MTMR3	0.258116	-16.039	1685.15	0.0431418	0.0301541	-0.474037
MTMR4	0.0422881	67.8913	989.662	0.201482	0.0892482	0.365947
MTMR6	0.495964	-4.42495	1331.59	0.00267372	0.2814	0.0835749
MTMR7	0.0803045	2.01862	47.5137	0.148706	0.0738331	0.388902
MTMR8	0.203056	0.909073	24.5145	0.0662309	0.104715	0.343883
MTR	0.442526	-30.7339	3351.35	0.00496015	0.144517	-0.294407
MTRF1	0.00257062	-17.8389	511.645	0.405119	0.0188615	-0.512147
MTRF1L	0.0282386	-18.6005	479.569	0.234211	0.266896	-0.120794
MTRNR2L1	0.149946	-1.31036	25.3839	0.0935023	0.318811	0.0534879
MTRNR2L10	0.048094	3.23767	-6.73299	0.190427	0.124351	0.320295
MTRNR2L12	0.0259703	31.4734	-61.6801	0.242542	0.00476626	0.605305
MTRNR2L2	0.0156613	16.7851	-29.5042	0.280996	0.000177713	0.774461
MTRNR2L3	0.0467808	1.59368	-2.56456	0.193107	0.0522395	0.422936
MTRNR2L4	0.00318643	-1.23862	16.7795	0.389923	0.0417027	-0.442613
MTRNR2L6.1	0.486083	0.0497946	2.37837	0.00331942	0.257053	0.133869
MTRNR2L8	0.011511	15.2416	-20.3318	0.303272	0.00159941	0.670382
MTRNR2L9	0.192499	0.443905	2.49933	0.0720034	0.243063	0.148875
MTRR	0.00122464	-97.5604	2433.6	0.454434	0.0106849	-0.552486
MVD	0.561807	-4.56058	1467.37	0.000904463	0.22793	-0.180076
MVK	0.394274	155.708	3173.41	0.0105298	0.346227	0.0169378
NADK	0.0182183	144.543	1392.95	0.268264	0.120831	0.324493
NADK2	0.0356044	-63.9368	1621.58	0.215682	0.0235002	-0.495655
NADK2_AS1	0.0555489	-2.34885	35.8851	0.17874	0.00665872	-0.585024
NADSYN1	0.495964	14.8195	2966.72	0.00211468	0.23905	-0.157121
NAGA	0.026862	101.408	1340.33	0.239507	0.0176944	0.517942
NAGK	0.442526	22.2557	2810.88	0.00471178	0.148299	0.289281
NAGLU	0.280017	23.3603	1749.87	0.0366399	0.106312	0.341431
NAGS	0.215155	-11.7311	267.475	0.0596385	0.191356	0.227769
NAMPT	0.134052	1062.04	4661.62	0.102677	0.104715	0.344774
NAMPTL	0.161765	-7.66873	119.574	0.0863828	0.273016	0.113662
NANP	0.200092	4.96838	132.396	0.068872	0.0752978	0.386673
NANS	0.122743	24.5917	714.066	0.109807	0.0374987	0.453087
NAPRT1	0.00126511	118.134	646.11	0.451278	0.0110699	0.550257
NAT1	0.0116019	11.9564	76.793	0.302571	0.018061	0.515044
NAT10	0.0655395	-54.462	2429.44	0.167286	0.233433	-0.163807
NAT14	0.152359	64.2281	782.068	0.0924304	0.189464	0.231558
NAT16	0.0293089	5.67366	-25.0027	0.230641	0.0213694	0.502508
NAT2	0.148682	-0.310462	5.6924	0.0943403	0.115812	-0.329449
NAT8	0.0603504	-547.662	7589.81	0.172694	0.0407111	-0.44551
NAT8L	0.36612	0.35707	13.5736	0.0153483	0.228127	0.179853
NDST1	0.210894	-86.9868	4653.55	0.0622422	0.172199	-0.259639
NDST2	0.00468752	3.31308	0.694763	0.366435	0.00127185	0.687989
NDST3	0.354038	-0.599817	20.3902	0.0170322	0.285515	-0.0786718
NDUFA1	0.313359	38.246	2767.76	0.0280062	0.167521	0.264542
NDUFA10	0.561807	-4.2311	3086.15	0.000837267	0.300912	0.0628483
NDUFA11	0.169495	17.7242	526.649	0.0821454	0.223783	0.184756
NDUFA12	0.313359	27.168	1540.76	0.0286149	0.109667	0.337643
NDUFA13	0.561807	0.271917	63.1102	0.000818223	0.283385	-0.0826834
NDUFA2	0.0875692	45.4093	934.693	0.140757	0.063915	0.40428
NDUFA3	0.561807	-4.94163	2008.1	0.00046533	0.211846	-0.1959
NDUFA3P1	0.0114111	-0.419455	6.78143	0.30428	0.00375742	-0.621978
NDUFA3P2	0.136991	-0.371592	6.35106	0.100555	0.0429751	-0.439647
NDUFA3P4	0.0839168	0.295943	0.00868545	0.144076	0.0896612	0.365393
NDUFA4	0.200092	167.892	3410.33	0.0688506	0.175169	0.255628
NDUFA4L2	0.431114	-1547.34	83641.4	0.00637593	0.233433	-0.17339
NDUFA5	0.583316	6.303	3983.56	0.000215317	0.238612	0.159349
NDUFA5P11	0.258116	0.121786	1.35503	0.0424177	0.19943	0.215993
NDUFA6	0.105142	147.315	1813.22	0.123469	0.15243	0.282817
NDUFA6_AS1	0.289884	-3.54378	221.486	0.033996	0.148299	-0.289726
NDUFA7.1	0.343833	-0.303432	20.0164	0.0188142	0.144616	-0.293961
NDUFA8	0.126031	-37.0013	1573.21	0.107725	0.24142	-0.152886
NDUFA9	0.211941	14.6333	390.775	0.0615198	0.166147	0.266994
NDUFA9P1	0.103796	-1.85665	41.3921	0.125549	0.0604742	-0.409628
NDUFAB1	0.204416	73.4297	1982.74	0.0656863	0.103958	0.345889
NDUFB1	0.336093	-8.90355	1451.4	0.0198076	0.283616	-0.0822377
NDUFB10	0.0223903	344.961	3373.37	0.255037	0.0362917	0.456208
NDUFB11	0.313359	32.1467	2358.23	0.0274205	0.130743	0.310453
NDUFB1P1	0.442526	-0.0422496	2.27937	0.00485819	0.346227	0.0164234
NDUFB1P2	0.299129	-0.278293	9.88432	0.0316141	0.178451	-0.249165
NDUFB2	0.208383	29.2865	1336.81	0.0633348	0.0867721	0.36929
NDUFB2_AS1	0.0955411	1.35622	8.57061	0.133775	0.124749	0.319813
NDUFB3	0.0726156	67.0871	1158.63	0.157112	0.0454614	0.434812
NDUFB4	0.0074217	213.785	2382.52	0.33317	0.00252549	0.647204
NDUFB4P2	5.68002e-05	-1.02795	10.5528	0.641403	0.00100467	-0.708238
NDUFB5	0.258116	-55.4109	2846.09	0.0425101	0.299183	-0.0668599
NDUFB6	0.0960888	-38.482	1253.95	0.133311	0.260298	-0.131268
NDUFB7	0.0358293	161.35	3132.02	0.214718	0.0235453	0.495432
NDUFB8	0.306179	6.11562	316.619	0.0304502	0.192317	0.225764
NDUFB8P2	0.0102327	-1.24686	18.8055	0.313038	0.0070949	-0.580121
NDUFB9	0.157373	155.787	3102.44	0.0889924	0.05049	0.425452
NDUFC1	0.210877	59.5004	2448.82	0.0623098	0.15243	0.283486
NDUFC2	0.520318	0.972473	358.574	0.00138123	0.277863	0.10809
NDUFS1	0.0255244	256.408	1461.8	0.244572	0.0401031	0.44707
NDUFS2	0.12175	48.0203	3189.25	0.110774	0.035384	0.458436
NDUFS3	0.398473	17.553	2075.03	0.00957328	0.18652	0.238913
NDUFS4	0.00546048	-174.547	2868.57	0.35575	0.1123	-0.333631
NDUFS5	0.0010008	675.426	937.595	0.466237	0.00043571	0.747717
NDUFS5P3	0.104648	0.175737	-0.262193	0.124785	0.0503116	0.425897
NDUFS5P5	0.155739	0.226452	0.0552765	0.0902095	0.0752978	0.386378
NDUFS6	0.495964	-13.8562	3181.03	0.00272444	0.323661	0.0307556
NDUFS7	0.0045935	58.6491	818.204	0.368065	0.00408998	0.616226
NDUFS8	0.00555745	246.998	1329.82	0.353968	0.00420393	0.613997
NDUFV1	0.361215	33.6411	6415.39	0.0163145	0.280436	0.0962783
NDUFV2	0.14041	-2.64925	59.7129	0.0987438	0.022866	-0.498106
NDUFV2P1	0.227084	1.0627	9.07909	0.0552425	0.127619	0.315579
NDUFV3	0.561807	-2.08319	1608.96	0.000928431	0.320674	0.040116
NEU1.1	0.0543235	145.806	2750.28	0.181102	0.0145877	0.529753
NEU3	0.406836	-3.00367	197.195	0.00820109	0.112958	-0.33274
NEU4	0.0045935	-2.4061	34.1018	0.368197	0.00129332	-0.68576
NFS1	0.431114	2.97986	809.127	0.00618175	0.320674	-0.0505907
NIT2	0.18608	124.772	2580.58	0.0749178	0.241981	0.151549
NME1	0.0547166	67.6523	549.054	0.180222	0.0319399	0.468911
NME1_NME2	0.10856	2.54923	39.5061	0.119584	0.14409	0.295521
NME2P1	0.237712	-0.754599	38.1618	0.0510833	0.206522	-0.201917
NME3	0.109592	324.184	3226.1	0.118393	0.176621	0.251839
NME4	0.0673029	464.265	3176.63	0.165534	0.138449	0.302875
NME6	0.100981	4.45207	337.567	0.127791	0.114849	0.330957
NME7	0.0272071	27.1042	241.976	0.237683	0.0164653	0.522399
NMNAT1	0.246666	5.57438	342.974	0.0473151	0.23905	0.155338
NMNAT1P3	0.495964	0.0789183	3.98612	0.00273457	0.233433	-0.173137
NMNAT2	0.381773	-1.41452	69.742	0.0132764	0.198636	-0.217072
NMNAT3	0.245903	7.49802	225.939	0.0481452	0.296392	0.06842
NMRK1	0.122231	-49.8749	1402.4	0.110117	0.0522757	-0.422555
NMRK2	0.398473	0.0444626	0.688718	0.00941357	0.283385	0.0827488
NNMT	0.561807	-205.616	54963.4	0.000579959	0.362358	-0.0131491
NNT	0.0226133	-88.0051	1996.48	0.254277	0.120831	-0.324493
NNT_AS1	0.000162849	-125.843	1607.84	0.579866	0.00870393	-0.566081
NOS1	0.519051	-0.111908	8.48578	0.00142196	0.260757	0.126636
NOS1AP	0.0529637	8.16481	-13.761	0.183012	0.224145	0.183419
NOS2	0.0113028	-10.4284	135.829	0.305476	0.0601563	-0.410074
NOS2P3	0.727756	-0.0193746	7.52544	1.41094e-05	0.300912	0.0641481
NOS3	0.0182183	-36.3577	712.521	0.268175	0.0316505	-0.470248
NPL	0.461646	46.4374	1881.74	0.00411654	0.233118	0.174727
NPLOC4	0.0936703	180.09	4280.03	0.13539	0.204351	0.209494
NPR1	1.399e-05	-324.965	4299.76	0.694494	0.000177713	-0.788947
NPR2	0.313999	-6.45646	347.754	0.0268312	0.233433	-0.166704
NQO1	0.0161262	140.285	416.272	0.278308	0.00868953	0.566304
NSD1	0.127628	30.9008	2436.49	0.106356	0.11108	0.33586
NSDHL	0.364874	5.87698	584.57	0.0159815	0.148299	0.289503
NT5C	0.00536245	75.938	1344.53	0.35698	0.00279519	0.640072
NT5C1B	0.201299	0.365954	1.02958	0.0673626	0.144517	0.294617
NT5C2	0.120925	34.9979	558.419	0.111188	0.0558393	0.416314
NT5C3A	0.153551	-50.0329	1829.88	0.0914683	0.280436	-0.102741
NT5C3AP1	0.0672374	-1.41155	24.6413	0.165682	0.237608	-0.161132
NT5C3B	0.327073	55.991	1551.93	0.0238203	0.18834	0.235124
NT5CP1	0.33263	0.0982118	2.3093	0.0217638	0.311932	0.0575251
NT5CP2	0.395596	-0.0550244	1.62471	0.0103906	0.186104	-0.239388
NT5DC4	0.136991	0.71366	2.46365	0.100486	0.0205866	0.50574
NT5E	0.561807	18.3785	1660.29	0.00067563	0.320674	0.0410074
NT5M	0.0696788	13.9656	45.525	0.160843	0.233433	0.169156
NTPCR	0.0379207	-58.7338	2227.59	0.209881	0.0410899	-0.444396
NUDT12	0.117623	-35.5451	817.961	0.113277	0.202527	-0.211946
NUDT13	0.333921	-3.13954	268.332	0.0212787	0.127448	-0.316025
NUDT16	0.236081	-44.9876	3125.43	0.0517991	0.18834	-0.233341
NUDT16L1	0.128981	87.5579	835.352	0.105424	0.105396	0.342769
NUDT16P1	0.123911	11.3024	333.948	0.10903	0.0690068	0.395142
NUDT2	0.016515	-23.0562	577.616	0.276049	0.0917904	-0.362827
NUDT21	0.424082	-22.9282	2327.39	0.00698997	0.255151	0.13684
NUDT22	0.0070919	50.3027	627.899	0.337024	0.0135324	0.535994
NUDT5	0.0813753	78.4142	1257.61	0.147295	0.110294	0.336974
NUDT9	0.105587	-29.1033	1299.57	0.12277	0.244103	-0.147983
NUS1	0.561807	-2.75465	1320.36	0.000425366	0.23905	0.157121
NUS1P1	0.364874	0.363177	15.8387	0.0157089	0.233433	0.16403
NUS1P2	0.480523	7.33345	308.914	0.00371452	0.281384	-0.093381
NUS1P3	0.237634	0.0983995	0.549722	0.0512511	0.195846	0.220715
OAT	0.162542	60.2747	1455.41	0.0856495	0.10074	0.349677
OCRL	0.363944	5.4196	1048.14	0.0161042	0.320674	0.0505907
ODC1	0.313359	62.9752	3192.96	0.02818	0.194061	0.223312
OGDH	0.561807	-17.9582	5761.79	0.000778332	0.320674	0.0505907
OGDHL	0.0159944	76.367	70.6414	0.279372	0.00928141	0.561623
OGT	0.398289	-118.086	7364.6	0.0098004	0.125598	-0.318476
OLAH	0.280133	0.559439	2.5366	0.0363103	0.323661	0.0318841
OPLAH	0.333921	46.4272	1619.65	0.0212601	0.320674	0.0463562
OSTC	0.398473	35.7143	3485.84	0.0096318	0.204351	0.208603
OSTCP1	0.0273502	0.256482	-0.50019	0.23717	0.0181636	0.51419
OSTCP5	0.490311	0.0407105	1.67945	0.00300976	0.233433	-0.170026
OSTCP8	0.0376345	-0.593011	8.22077	0.210489	0.0102028	-0.555493
OXCT1	0.172586	-20.225	592.108	0.0803992	0.204381	-0.205929
OXCT1_AS1	0.0045996	-1.28886	13.8795	0.367483	0.0605233	-0.409461
OXCT2	0.738455	-0.0051197	11.8728	5.83068e-06	0.18834	-0.235793
OXCT2P1	0.207942	-0.278504	6.09485	0.0637312	0.128049	-0.314943
OXSM	0.12559	-6.14839	340.67	0.108212	0.148935	-0.288166
P4HA1	0.432443	-60.617	5256.1	0.00596963	0.242018	-0.149989
P4HA2	0.196088	-147.537	4957.3	0.0706701	0.10074	-0.349677
P4HA2_AS1	0.0932706	-0.809106	13.6621	0.135871	0.0180517	-0.515936
P4HA3	0.22628	47.6736	632.813	0.0556895	0.0822962	0.376644
PAFAH1B1	0.561807	-7.45987	3418.57	0.000798273	0.266896	0.121462
PAFAH1B2	0.231295	39.4784	2964.65	0.0540367	0.120831	0.324271
PAFAH1B3	0.00215087	101.556	-73.358	0.416566	0.00122214	0.69824
PAFAH2	0.000162849	96.1195	466.891	0.576554	0.00500288	0.602631
PAH	0.164369	25.8445	-45.0456	0.0847374	0.0317585	0.46958
PAICS	0.10476	120.663	2745.63	0.124554	0.0737142	0.389125
PAICSP1	0.0701647	-0.547238	10.8708	0.160025	0.091374	-0.363495
PAICSP4	0.146317	0.178458	1.09806	0.0955556	0.0679843	0.397749
PANK1	0.266652	24.1225	226.745	0.0401894	0.233433	-0.170493
PANK2	0.467447	-7.22438	1173.32	0.00399346	0.269161	0.118119
PANK3	0.193733	-29.7041	1883.3	0.0715893	0.153718	-0.279474
PAPSS1	0.228017	31.6712	1385.52	0.0550208	0.15243	0.283263
PAPSS2	0.210099	77.5968	2046.26	0.0625296	0.0920523	0.361712
PC	0.43672	60.1601	2291.98	0.00551666	0.233433	-0.169824
PCA3	0.00747656	-9.35072	135.364	0.332649	0.00882237	-0.564298
PCAT1	0.168366	1.74809	30.3819	0.082665	0.18834	0.236461
PCAT2	0.442526	-0.0687863	3.82781	0.00500785	0.285515	-0.0795175
PCAT6	0.343833	13.3908	172.905	0.0187838	0.184598	-0.241364
PCAT7	0.0189696	-5.12243	85.0279	0.265604	0.0082952	-0.569424
PCBD1	0.00899759	231.066	2024.47	0.320911	0.00335244	0.631603
PCBD2	0.431114	-4.87813	667.094	0.00629043	0.205316	-0.204368
PCBP1	0.250109	101.734	3927.77	0.0450524	0.143172	0.297081
PCBP1_AS1	0.345143	-32.0708	1718.67	0.0184803	0.107717	-0.339648
PCBP2	0.158434	-160.182	9470.16	0.0880064	0.253067	-0.139292
PCBP2P1	0.0434748	-0.353102	4.75204	0.19921	0.00254615	-0.646363
PCBP3	0.387427	6.20087	97.9732	0.0126415	0.195749	0.221752
PCBP4	0.313359	-9.40469	587.703	0.0270276	0.189464	-0.231781
PCCA	0.201299	-54.387	1632.62	0.0677329	0.277166	-0.110987
PCCA_AS1	0.0437154	-1.22949	18.7279	0.19881	0.00696444	-0.581681
PCCB	0.490311	-5.8042	1101.66	0.00303821	0.264951	0.123914
PCDH1	0.43269	62.3418	2261.63	0.00594051	0.232919	-0.17495
PCDH10	0.187172	137.052	92.9722	0.0742597	0.233433	0.164843
PCDH11X	0.318156	0.477684	0.651639	0.0260496	0.266896	0.121601
PCDH11Y	0.573548	-0.0330556	5.02771	0.000378742	0.15243	-0.282694
PCDH12	0.0055089	-177.815	2248.48	0.354928	0.0180312	-0.516381
PCDH15	0.162542	8.22456	-27.6616	0.0856518	0.0232857	0.496365
PCDH17	0.173359	-98.9816	2429.12	0.0800554	0.255778	-0.13528
PCDH18	0.000988714	-32.0089	381.742	0.467162	0.00581384	-0.593048
PCDH19	0.0256365	-2.07625	26.936	0.243613	0.18834	-0.234901
PCDH20	0.265916	-3.79519	69.2834	0.0405726	0.320674	-0.0504239
PCDH7	0.0509613	-22.7509	280.676	0.185533	0.118958	-0.326499
PCDH9	0.000162849	-11.8801	120.198	0.58703	0.022866	-0.498162
PCDHA1	0.157257	0.558466	1.04298	0.0893098	0.212607	0.194494
PCDHA10	0.000187962	-9.40558	88.8568	0.556535	0.0123204	-0.54321
PCDHA11	0.0271446	-0.736562	8.37056	0.238128	0.0176944	-0.517847
PCDHA12	0.0391114	-0.529884	7.09896	0.207646	0.0561934	-0.415344
PCDHA13	0.00741476	-0.458498	5.39991	0.334177	0.0351568	-0.459028
PCDHA2	0.0255244	3.67295	-11.3979	0.244323	0.107548	0.340183
PCDHA3	0.10982	1.60096	-0.0348821	0.11765	0.191356	0.227608
PCDHA4	0.0249139	11.4258	-38.783	0.245896	0.15963	0.273903
PCDHA5	0.026862	4.82997	-15.2929	0.239551	0.172199	0.259772
PCDHA6	0.0427399	0.951482	-0.501089	0.200719	0.123914	0.321174
PCDHA7	0.36612	-0.421498	12.4262	0.0152433	0.388938	0.00635877
PCDHA8	0.00998953	-0.381443	4.11162	0.31468	0.0878102	-0.3673
PCDHA9	0.00440549	-0.890947	10.0444	0.370514	0.10074	-0.349471
PCDHAC1	0.402431	-0.212597	8.54817	0.00853644	0.320674	0.0394649
PCDHAC2	0.495964	0.279593	19.4474	0.00197806	0.281384	0.0904838
PCDHB10	0.010696	-31.7565	435.633	0.310113	0.182519	-0.242702
PCDHB11	0.00100144	-7.2445	78.8985	0.465742	0.00341055	-0.628038
PCDHB12	0.000781869	-13.8516	153.686	0.481826	0.0340065	-0.463116
PCDHB13	0.127628	19.5101	22.1305	0.106498	0.195846	0.220415
PCDHB14	0.392153	7.1093	190.452	0.0106351	0.320674	0.0508135
PCDHB15	0.000162849	-50.6355	515.018	0.5768	0.0026456	-0.644307
PCDHB16	0.0122541	-58.524	768.175	0.298132	0.238612	-0.159349
PCDHB17	0.00872309	-3.61171	50.6169	0.323425	0.00219766	-0.656119
PCDHB18	0.00774115	-2.02773	29.4686	0.330704	0.0343943	-0.461779
PCDHB19P	0.028555	-0.739186	12.2114	0.232661	0.0218648	-0.501004
PCDHB2	0.391942	9.61961	172.537	0.0111819	0.266896	0.120348
PCDHB3	0.00872309	-12.2366	141.678	0.323386	0.206522	-0.203031
PCDHB4	0.253409	-22.3707	350.46	0.0439984	0.178416	-0.249833
PCDHB5	0.012171	-5.75602	80.4817	0.299673	0.0619675	-0.407177
PCDHB6	0.3239	-25.3698	632.918	0.0245513	0.0327612	-0.466459
PCDHB7	0.495964	-3.77432	136.015	0.00242599	0.00531482	-0.598173
PCDHB8	0.200092	5.76477	15.3928	0.0691553	0.19943	0.215958
PCDHB9	0.121789	-18.2321	350.49	0.110542	0.191356	-0.227547
PCDHGA1	0.000401835	-31.8322	317.022	0.512668	0.146177	-0.292624
PCDHGA10	0.00918453	-4.31406	66.3748	0.319791	0.0260651	-0.487409
PCDHGA11	0.000324307	-41.6843	402.649	0.521801	0.00876588	-0.565412
PCDHGA12	0.514849	-1.47922	78.921	0.00156467	0.00853744	-0.567641
PCDHGA2	0.00197066	-8.60463	91.759	0.422309	0.124824	-0.319287
PCDHGA3	0.000396119	-5.90597	60.1946	0.513796	0.167092	-0.265803
PCDHGA4	0.43672	0.524743	18.3618	0.00572047	0.195749	-0.221529
PCDHGA5	0.786211	0.016403	42.4166	1.87164e-06	0.223783	-0.184533
PCDHGA6	0.122766	-6.60136	117.666	0.109644	0.013878	-0.533765
PCDHGA7	0.340125	-1.23446	41.2688	0.0192212	0.109802	-0.33742
PCDHGA8	0.378072	0.282851	7.962	0.013645	0.457289	0.00289726
PCDHGA9	0.00122464	-5.12228	66.5598	0.454735	0.00159941	-0.670605
PCDHGB1	0.266199	4.3613	12.8452	0.0404392	0.346227	0.0209494
PCDHGB2	0.484444	2.96105	129.786	0.00357748	0.277166	-0.110542
PCDHGB3	0.495964	-0.492633	34.856	0.00241536	0.164266	-0.268554
PCDHGB4	0.016515	9.89328	-27.1392	0.276172	0.0470427	0.431024
PCDHGB6	0.00371283	-5.47993	85.4766	0.380459	0.00122214	-0.698909
PCDHGB7	0.583316	-1.76283	617.86	0.000166031	0.280436	0.103856
PCDHGB8P	0.00122464	-4.82619	59.3824	0.455075	0.00122214	-0.694897
PCDHGC3	0.33263	-11.4533	662.912	0.0216901	0.281384	-0.0889237
PCDHGC4	0.109592	-1.42783	25.149	0.118469	0.00356824	-0.625586
PCDHGC5	0.311514	-0.744603	24.143	0.0289534	0.226759	-0.180968
PCDP1	0.219112	21.33	395.579	0.0579606	0.209837	0.199688
PCED1A	0.289884	-46.9928	2920.6	0.0341762	0.204351	-0.207043
PCED1B	0.347902	9.84279	383.543	0.0177494	0.192361	0.224872
PCED1B_AS1	0.248212	19.0337	376.425	0.0458691	0.173375	0.257634
PCF11	0.130934	-36.2139	1649.74	0.104058	0.02394	-0.494095
PCGEM1	0.122085	-1.48542	18.9995	0.110318	0.196053	-0.219125
PCGF1	0.320333	7.70893	863.294	0.0258273	0.280436	0.103856
PCGF2	0.38505	-16.2686	1746.3	0.0129494	0.23905	-0.157121
PCGF3	0.00605805	-180.839	3377.15	0.348409	0.00460241	-0.607757
PCGF5	0.561807	6.32056	2482.18	0.000485054	0.222454	-0.186093
PCGF6	0.398473	3.20534	280.888	0.00940188	0.23905	0.156675
PCGF7P.1	0.261611	0.106879	0.497738	0.0416326	0.273016	0.113314
PCID2	0.0451889	-57.7532	1591.07	0.19583	0.179678	-0.247159
PCIF1	0.133715	49.1185	1377.58	0.102877	0.194061	0.223312
PCK1	0.224554	331.064	-1157.84	0.05661	0.211791	-0.19746
PCK2	0.248212	45.3366	1067.85	0.0458965	0.320674	0.0519279
PCLO	0.0113198	-54.822	1053.9	0.305235	0.0203194	-0.507021
PCM1	0.0481797	126.978	1680.96	0.190126	0.0555404	0.41676
PCMT1	0.219108	-42.296	1810.39	0.0580425	0.320674	-0.0430132
PCMTD1	0.328412	-39.8524	2140.35	0.0233071	0.181522	-0.243593
PCMTD2	0.013281	-121.971	3166.3	0.291391	0.00691461	-0.582127
PCNA	0.248212	83.1391	1346.93	0.0457826	0.151995	0.284378
PCNP	0.0774074	111.326	2860.65	0.152344	0.0410899	0.444173
PCNPP1	0.107215	-0.901604	21.7388	0.120823	0.033612	-0.464231
PCNPP5	0.364874	-0.102564	5.72059	0.015879	0.18834	-0.236684
PCNT	0.106722	29.3469	1084	0.121563	0.129107	0.31335
PCNX	0.391854	12.3705	1215.63	0.0117733	0.232356	0.176064
PCNXL2	0.470712	-3.75954	731.933	0.00392092	0.192361	-0.224649
PCNXL3	0.00267239	150.201	1489.17	0.402664	0.0334851	0.464676
PCNXL4	0.561807	2.12429	1279.26	0.000918817	0.396198	0.00579453
PCOLCE	0.0121723	-163.195	2434.24	0.299502	0.0690068	-0.395142
PCOLCE_AS1	0.00884637	-1.23198	17.7489	0.322233	0.00456762	-0.608425
PCOLCE2	0.726719	2.21638	2048.5	3.67729e-05	0.277863	0.10809
PCP2	0.238314	3.23588	22.1569	0.050488	0.556272	0.000445733
PCP4	0.0696511	1.59991	4.49679	0.161138	0.0780291	0.382439
PCP4L1	0.317757	-0.241408	8.30868	0.0262201	0.187725	-0.238159
PCSK1	0.247452	-2.68707	82.8422	0.0462943	0.0554441	-0.416983
PCSK1N	0.210941	143.026	442.272	0.0621687	0.281384	0.0922667
PCSK4	0.378167	7.14216	427.653	0.0135448	0.280436	-0.0971698
PCSK5	0.0596706	120.295	-147.742	0.174069	0.206522	0.202808
PCSK6	0.0847309	-108.519	3060.57	0.143149	0.211791	-0.19746
PCSK7	0.238023	-62.1961	3242.44	0.0509467	0.0858057	-0.37085
PCSK9	0.288347	0.711504	-0.340855	0.0346674	0.196053	0.219142
PCTP	0.202278	26.6874	770.785	0.0665252	0.199952	0.214175
PCYOX1	0.328412	64.8956	2807.73	0.0233483	0.189502	0.23089
PCYOX1L	0.0834039	31.4651	223.448	0.144856	0.214757	0.192779
PCYT1A	0.201299	24.0609	2243.36	0.067501	0.15963	0.273903
PCYT1B	0.050307	1.06285	0.882456	0.186463	0.0186486	0.512816
PCYT2	0.00329716	168.665	137.497	0.386951	0.0030024	0.636729
PDE10A	0.0133023	371.992	-247.374	0.290979	0.0363602	0.455985
PDE11A	0.726719	-0.312816	481.259	1.82423e-05	0.311932	-0.0577224
PDE1A	0.00377373	-36.5628	455.508	0.379524	0.01915	-0.511033
PDE1B	0.00274603	-37.8736	618.719	0.399819	0.00721859	-0.578784
PDE1C	0.0714601	-27.281	458.291	0.158692	0.0297985	-0.475151
PDE2A	0.164369	-44.721	723.229	0.0846321	0.00679787	-0.583464
PDE3A	0.00166569	-114.964	1396.93	0.432671	0.0034985	-0.626477
PDE3B	0.208383	12.2426	128.231	0.0633343	0.0789137	0.381102
PDE4A	0.0600855	36.878	1016.5	0.173218	0.0360778	0.456653
PDE4B	0.431114	-15.5759	954.256	0.00646429	0.160474	-0.272343
PDE4C	0.0029008	-12.5685	186.886	0.3959	0.00122214	-0.695566
PDE4D	0.000219242	-147.938	2267.89	0.545956	0.0105906	-0.553154
PDE4DIP	0.0969653	266.524	4414.06	0.132032	0.215345	0.191665
PDE5A	0.0287563	-61.3333	989.611	0.232076	0.0858057	-0.371073
PDE6A	0.171822	0.486298	5.70833	0.0810859	0.141124	0.29931
PDE6B	0.000762977	121.972	34.7818	0.484809	0.00706518	0.58079
PDE6C	0.0655395	-2.85717	59.9293	0.167268	0.0119637	-0.544908
PDE6D	0.0899105	-12.6002	731.144	0.138998	0.168109	-0.263874
PDE6G	0.520318	-0.251586	35.5077	0.00137342	0.310237	-0.0590596
PDE7A	0.0083471	-256.721	4327.6	0.326357	0.00236433	-0.651661
PDE7B	0.0174995	-29.5286	371.539	0.271349	0.00375742	-0.622243
PDE8A	0.0282386	-105.436	2453.1	0.234112	0.0159475	-0.524628
PDE8B	0.000744749	-39.0854	550.66	0.487575	0.0258028	-0.4883
PDE9A	0.0236695	-63.1805	1259.53	0.250264	0.0206504	-0.505461
PDHA1	0.391942	18.5074	2219.8	0.0114749	0.172525	0.258971
PDHB	0.442526	-5.76454	935.952	0.00506558	0.280436	0.0965012
PDSS1	0.488204	1.56342	194.191	0.00311141	0.294351	0.0715401
PDSS2	0.156494	-12.3051	672.337	0.0899089	0.226759	-0.181413
PDXK	0.333921	139.512	6572.53	0.0211979	0.320674	-0.040116
PDXP	0.211021	12.1607	100.846	0.0619804	0.18834	0.23557
PEMT	0.431114	3.27712	444.799	0.00659002	0.233433	0.170493
PFAS	0.222836	24.6919	700.263	0.0570389	0.244103	0.14776
PFKFB1	0.248428	0.677244	8.87059	0.0455976	0.204351	0.208403
PFKFB2	0.0947497	39.1853	364.329	0.134635	0.0896612	0.365278
PFKFB3	0.726719	-7.97404	8169.63	1.98842e-05	0.253067	-0.139292
PFKFB4	0.431114	31.4412	1382.2	0.00625272	0.278508	-0.105193
PFKL	0.313359	205.367	12217.5	0.0285898	0.2814	-0.0849121
PFKM	0.351605	-17.3694	1806.28	0.0174204	0.323661	0.0358815
PFKP	0.570332	-42.9052	18012.1	0.000388684	0.318149	-0.0543794
PGAM1	0.109592	169.407	3215.34	0.118698	0.0277568	0.48206
PGAM1P11	0.462081	-0.0669184	3.21545	0.00408468	0.0747053	-0.38731
PGAM1P5	0.0122541	-0.734715	10.0888	0.298648	0.00609461	-0.590216
PGAM1P6	0.162064	-0.257305	4.96716	0.0858604	0.0111661	-0.54961
PGAM1P7	0.0267044	-0.479175	7.10185	0.240042	0.0123204	-0.543144
PGAM4	0.337042	0.173342	8.17606	0.0196626	0.223906	0.183865
PGAM4P1	0.0447079	-0.37847	4.23963	0.196873	0.181473	-0.244629
PGAP1	0.0013137	-55.7234	905.271	0.448212	0.0605233	-0.409406
PGAP2	5.68002e-05	59.1237	325.954	0.650265	0.000177713	0.785158
PGAP3	0.10118	-64.6151	1871.22	0.127426	0.044413	-0.436818
PGD	0.0242259	425.711	-56.6004	0.24836	0.0180517	0.515713
PGDP1	0.115725	0.110049	0.00334867	0.11416	0.11036	0.336811
PGK1	0.364874	-565.14	31705.9	0.0158169	0.192833	-0.223981
PGK1P2	0.321888	0.599295	13.6255	0.0251139	0.323661	0.0327614
PGK2	0.0393855	0.307252	-0.725702	0.206735	0.0322084	0.467978
PGLS	0.0427399	104.062	1888.53	0.200666	0.044413	0.436818
PGM1	0.0293129	358.957	1774.93	0.230495	0.10236	0.347672
PGM2	0.345914	-7.5062	812.404	0.0180014	0.374846	0.0113662
PGM2L1	0.000120068	-105.603	1529.3	0.602143	0.00122214	-0.694229
PGM3	0.442526	7.44037	1054.07	0.00502326	0.323661	0.0338757
PGP	0.0692	48.1739	629.612	0.162488	0.0679843	0.397371
PGPEP1	0.371079	105.562	3725.04	0.0144671	0.244786	-0.145086
PGPEP1L	0.107565	-0.384433	6.4911	0.120501	0.104715	-0.344482
PGS1	0.495964	6.55248	1367.8	0.00203293	0.320674	0.0508135
PHGDH	0.00588548	154.338	-227.501	0.350526	0.00738735	0.577224
PHOSPHO1	0.583316	0.296484	97.461	0.000171055	0.320674	0.0519279
PHOSPHO2	0.211021	-1.94269	77.2542	0.0620317	0.240528	-0.154001
PHYKPL	0.321888	-130.263	5893.72	0.0252488	0.110765	-0.336305
PI4K2A	0.389466	13.9319	782.926	0.012526	0.172199	0.259862
PI4K2B	0.495964	-2.83776	979.155	0.00240453	0.320674	-0.0439047
PI4KA	0.247216	38.3452	2335.76	0.0464431	0.17477	0.256074
PI4KAP1	0.384944	7.68207	396.497	0.0130146	0.249697	0.141743
PI4KAP2	0.427643	5.57395	334.594	0.00674317	0.280436	-0.0971698
PI4KB	0.689379	-1.02288	2822.8	6.86417e-05	0.260757	-0.126588
PIGA	0.191628	-12.6679	519.205	0.0724056	0.130743	-0.310453
PIGB	0.484444	-1.13194	394.612	0.00361193	0.323661	-0.0361044
PIGC	0.273423	12.6622	881.738	0.0378532	0.0931547	0.360152
PIGCP1	0.243819	-5.92592	213.566	0.0487725	0.129107	-0.31335
PIGF	0.150595	-3.97066	218.765	0.093133	0.148174	-0.289949
PIGFP1	0.490311	0.0375075	2.32447	0.00303675	0.374846	0.0080411
[truncated: 568 more rows]

## Sheet: SNRpyruvate
	Pearson correlations				Spearman Correlations
Gene name	Corrected p-value	Slope	Intercept	r2	corrected_spearman_P	spearman_coef
A3GALT2	0.241599	0.0991686	6.32753	0.0826388	0.0396015	0.379361
A4GALT	0.421526	5.31637	3279.19	0.00794866	0.152765	0.177179
AACS	0.272442	-4.15877	941.937	0.0622236	0.0518804	-0.345443
AACSP1	0.232698	-1.70255	161.781	0.0891114	0.0173644	-0.457099
AADAT	0.437749	-0.196052	225.467	0.00248665	0.223918	0.0969469
AANAT	0.356324	-0.0899956	24.3005	0.0209526	0.171133	0.159572
AASDHPPT	0.211089	3.5208	880.954	0.110199	0.0348986	0.394028
AASS	0.437749	-1.04197	530.644	0.00613207	0.19921	0.119011
ABAT	0.275836	-10.1786	1106.44	0.0607778	0.00401156	-0.561178
ABHD14A_ACY1	0.192523	-0.204828	12.9575	0.122958	0.00028836	-0.690094
ABHD16A	0.388042	0.150206	45.9202	0.0118839	0.0331384	0.400268
ABO	0.349438	0.982736	51.4262	0.0249486	0.3028	0.0303098
ACAA1	0.203031	6.03289	1256.46	0.116706	0.00398455	-0.562069
ACAA2	0.00290137	54.4069	1482.19	0.430477	0.101789	0.24025
ACACA	0.466959	0.0819652	1363.37	1.19732e-05	0.0817255	0.280366
ACACB	0.24919	-10.3411	1804.67	0.0751598	0.00118244	-0.627592
ACAD8	0.326369	-1.57703	969.296	0.0358575	0.0560886	-0.335637
ACADL	0.272442	17.8286	901.639	0.0623824	0.248797	-0.0630712
ACADM	0.218693	14.7592	1409.87	0.101803	0.0552567	-0.33742
ACADS	4.27808e-06	25.2734	1381.45	0.670532	0.00324887	0.57455
ACADSB	0.0824485	9.25381	888.691	0.229336	0.0989676	0.245153
ACADVL	0.212042	66.2131	13556	0.107408	0.102381	-0.239359
ACAT1	9.75371e-06	48.012	1536.51	0.646138	0.00227527	0.595276
ACAT2	0.337427	0.945639	231.42	0.0285653	0.0149505	0.467574
ACER1	0.37836	-0.0111135	2.15794	0.0151347	0.255504	0.0567397
ACER2	0.437749	0.106624	43.5837	0.00395099	0.075791	-0.291509
ACER3	0.153769	-7.77588	1887.91	0.163492	0.348475	-0.0202808
ACHE	0.0788298	-23.8746	1945.03	0.234289	0.000402548	-0.67796
ACLY	0.437749	-11.499	11397.5	0.00370301	0.00525309	-0.543348
ACMSD	0.384816	5.55799	1056.96	0.0139321	0.0041471	-0.558503
ACO1	0.267806	11.2667	2087.75	0.0649863	0.00229716	0.59483
ACO2	0.212956	21.3523	2792.25	0.106289	0.239811	0.0797862
ACOT1	0.0952961	1.79029	118.571	0.217466	0.196617	-0.127702
ACOT11	0.316211	-1.51098	320.595	0.0415039	0.00244693	-0.591933
ACOT12	0.207711	-0.12273	7.70071	0.112712	0.00742835	-0.520253
ACOT13	0.000263044	7.94495	476.232	0.532134	1.88823e-05	0.778695
ACOT2	4.36583e-08	8.96168	448.554	0.783129	0.00708941	0.523513
ACOT4	0.0589567	4.90547	155.932	0.254419	0.0431905	-0.36773
ACOT7	0.446488	2.7898	2833.81	0.00080855	0.3028	0.0298641
ACOT8	0.294259	-1.41692	590.444	0.052818	0.0370884	-0.386896
ACOX1	0.338097	-5.61092	2125.81	0.0281244	0.0112537	-0.489192
ACOX2	0.316211	-1.98717	288.737	0.0407839	0.000405164	-0.677514
ACOX3	0.212528	-6.65023	1027.81	0.106852	0.0173644	-0.457099
ACP1	0.336243	5.1868	2722.19	0.0295696	0.0773021	0.289281
ACP2	0.293562	-8.82481	2349.75	0.0539956	0.180995	-0.14776
ACP5	0.316211	-19.87	1952.42	0.0416951	0.256707	-0.0552709
ACSBG1	0.218728	-0.205438	23.4268	0.101215	0.00616174	-0.533096
ACSBG2	0.43516	-0.0510666	19.9696	0.0063888	0.0573194	-0.332071
ACSF3	0.19729	-13.9177	1752.89	0.118872	0.013327	-0.476488
ACSL1	0.316211	-60.8793	10502.8	0.0412229	0.0969881	-0.248942
ACSL3	0.30612	-5.10143	1811.52	0.0469041	0.0294806	-0.411189
ACSL4	0.221298	-11.7997	2798.11	0.0985788	0.160735	-0.166927
ACSL5	0.446488	1.78742	2212.8	0.00122229	0.0714427	0.301093
ACSL6	0.163399	-0.952821	74.2907	0.153162	0.0010078	-0.634946
ACSM1	0.246998	-1.13773	136.944	0.0761772	0.00338328	-0.571652
ACSM2A	0.387378	-99.7225	18199	0.0127447	0.00181033	-0.608202
ACSM2B	0.327301	-135.102	15267.1	0.0350411	0.000710734	-0.651216
ACSM3	0.30612	2.33945	568.281	0.0477311	0.0317496	0.40428
ACSM4	0.311796	-0.156918	16.5423	0.0448037	0.0740753	-0.295298
ACSM5	0.223143	-48.8576	4247.54	0.0978497	5.38382e-05	-0.746825
ACSS1	0.168838	21.8944	1785.9	0.148572	0.00401156	0.561178
ACSS2	0.338097	-12.0149	2685.35	0.0280442	0.053148	-0.3421
ACSS3	0.279872	7.89572	739.086	0.0582819	0.0732633	-0.297081
ACY1	0.209185	-2.79959	229.273	0.111539	0.000128475	-0.719413
ACYP1	0.00410973	4.21595	211.298	0.411358	0.0135921	0.474928
ACYP2	0.192523	-1.23716	432.333	0.124219	0.0170038	-0.458436
ADA	0.32971	-2.04397	725.924	0.0322831	0.239811	-0.0666371
ADAD2	0.263132	-0.156978	11.6409	0.0671898	0.0101595	-0.496977
ADAL	0.171759	-1.03309	382.416	0.14292	0.176906	-0.154001
ADAM10	0.434333	5.04282	4787.15	0.00673622	0.0942025	0.257411
ADAM11	0.149097	0.513649	41.3242	0.167239	0.00308697	0.57767
ADAM12	0.371628	6.34014	887.348	0.0162134	0.0396015	0.379319
ADAM15	0.336243	16.8116	3923.44	0.0294903	0.0487646	0.353243
ADAM17	0.384816	1.36494	703.588	0.0139414	0.0933357	0.260085
ADAM18	0.241599	-0.627403	37.714	0.0851378	0.00115148	-0.628769
ADAM19	0.437749	1.49739	700.807	0.00575754	0.0290076	0.412749
ADAM1A	0.149097	-1.68339	285.105	0.167332	0.015404	-0.464899
ADAM1B	0.151967	-0.186635	18.0536	0.165236	0.00839829	-0.511256
ADAM20	0.408772	-0.0249962	5.94366	0.00933721	0.13985	-0.192779
ADAM20P1	0.359508	-0.0325783	5.66399	0.0204844	0.0888788	-0.266548
ADAM21	0.269259	-0.0795178	7.76004	0.0637236	0.0526364	-0.343144
ADAM22	0.292083	10.0559	880.548	0.0543735	0.00247251	0.591265
ADAM23	0.446488	0.0448569	34.9931	0.000271086	0.106094	0.233033
ADAM28	0.241711	-16.459	1602.82	0.0801972	0.000162803	-0.710944
ADAM29	0.338097	-0.0154375	2.25867	0.0273395	0.156947	-0.172279
ADAM32	0.380603	0.148444	41.7817	0.0147781	0.00206977	0.601294
ADAM33	0.326369	-0.379662	28.8698	0.0357352	0.224607	-0.0911524
ADAM7	0.301881	0.105436	2.6229	0.0498112	0.00354527	0.568816
ADAM8	0.382396	15.3287	2117.55	0.0145532	0.101629	0.240919
ADAM9	0.30612	37.6874	5666.75	0.0477555	0.0365588	0.388456
ADAMDEC1	0.292707	-9.73466	656.808	0.0542299	0.053148	-0.3421
ADAMTS1	0.154397	-50.4003	4612.99	0.162925	0.002097	-0.599511
ADAMTS10	0.24919	-21.4141	3170.27	0.0751595	0.00921418	-0.505015
ADAMTS12	0.369955	1.76563	230.072	0.0165574	0.00415203	0.55828
ADAMTS13	0.146805	-3.06938	353.919	0.169948	0.00262632	-0.587699
ADAMTS14	0.437749	-1.8903	802.12	0.00433329	0.323698	0.0240696
ADAMTS15	0.267806	10.506	361.896	0.064387	0.00469204	0.550926
ADAMTS16	0.181909	0.744947	27.7091	0.135443	0.3028	-0.031647
ADAMTS17	0.0461093	1.28456	60.5182	0.270507	0.00880353	0.508581
ADAMTS18	0.446488	-0.0809983	37.2723	0.000846692	0.0647628	0.317847
ADAMTS19	0.466959	0.0008414	1.74003	4.19604e-05	0.110491	0.227527
ADAMTS2	0.446488	0.341316	776.086	9.4887e-05	0.0671779	0.310676
ADAMTS20	0.356324	-0.0159679	2.04321	0.0209263	0.223918	-0.0978834
ADAMTS3	0.24919	5.98046	183.247	0.0748212	0.000235972	0.697126
ADAMTS4	0.190603	-47.153	3421.89	0.126977	0.00201736	-0.602408
ADAMTS5	0.350815	-4.13911	682.23	0.0228844	0.0660193	-0.313796
ADAMTS6	0.437749	-0.109247	64.1652	0.00212322	0.117807	0.218186
ADAMTS7	0.437749	1.77966	455.318	0.00545593	0.37275	0.0131491
ADAMTS7P2	0.241599	-0.0250833	1.63543	0.082959	0.0507057	-0.347768
ADAMTS7P3	0.218728	0.0828848	3.71426	0.101447	0.0748892	0.293069
ADAMTS7P4	0.327301	0.355506	33.0481	0.0348102	0.0560886	0.335414
ADAMTS8	0.387378	0.0970604	28.9841	0.012472	0.239811	0.0813462
ADAMTS9	0.233798	-6.85603	1413.59	0.0886505	0.175167	-0.155784
ADAMTS9_AS1	0.437749	2.86869	800.332	0.00619963	0.0433357	-0.367284
ADAMTS9_AS2	0.357592	-1.75586	391.885	0.0207569	0.0114938	-0.487409
ADAMTSL1	0.438051	-0.162421	70.541	0.0020153	0.37275	0.0164921
ADAMTSL2	0.466959	-0.0328741	122.204	3.14106e-05	0.1536	-0.175396
ADAMTSL3	0.254343	7.70119	737.002	0.0717554	0.030949	0.407177
ADAMTSL4	0.322163	-7.53965	1770.63	0.0381664	0.0128514	-0.479386
ADAMTSL4_AS1	0.146435	-0.27765	26.5696	0.171827	0.000194747	-0.703589
ADAMTSL5	0.254343	2.73571	91.7115	0.0716168	0.0211263	0.439715
ADAP1	0.394732	-1.42353	400.534	0.0108727	0.0313901	-0.405394
ADAP2	0.241599	-11.3531	1701.44	0.0833881	0.0212695	-0.439047
ADAR	0.437749	-4.23847	7929.51	0.00474637	0.3028	0.0287498
ADARB1	0.446488	-0.226544	855.122	0.000105162	0.1536	-0.175619
ADARB2	0.00277083	0.391429	6.25017	0.433469	3.54037e-05	0.759974
ADAT1	3.34387e-05	-7.47092	1047.49	0.602581	0.000279349	-0.691332
ADAT2	0.394732	-0.613719	302.797	0.0107389	0.0942025	0.257856
ADAT3	0.437749	0.230882	208.91	0.00572928	0.0950452	0.253845
ADCY1	0.446488	-0.222509	102.725	0.00130937	0.37275	-0.0142635
ADCY10	0.437749	-0.135675	47.3355	0.00570696	0.445367	-0.00289726
ADCY10P1	0.446488	-0.0991169	156.772	0.000443339	0.223918	-0.0971698
ADCY2	1.6771e-09	8.09212	-58.5069	0.838708	4.21297e-05	0.755517
ADCY3	0.369955	-2.77058	1067.38	0.0170441	0.26486	0.0465791
ADCY4	0.322574	4.63453	480.531	0.0371617	0.192307	-0.130823
ADCY5	0.0059233	26.5855	106.422	0.391005	0.185689	-0.141074
ADCY6	0.136906	-18.1188	2284.49	0.178115	3.36379e-06	-0.824606
ADCY7	0.394732	-3.16116	806.293	0.0107326	0.263426	-0.0472477
ADCY8	0.298404	-1.13795	80.2421	0.0507387	0.00122771	-0.625642
ADCY9	0.367213	4.94543	1623.96	0.0186074	0.0448616	-0.363272
ADH1B	0.415125	-1.36562	133.162	0.0088804	0.112798	0.224649
ADH1C	0.314282	0.952381	25.9337	0.0433577	0.0137904	0.473814
ADH4	0.19729	-0.0542091	3.64178	0.119127	0.000895353	-0.641027
ADH5	0.0175802	34.3207	3207.27	0.335664	0.0209225	0.44083
ADH5P4	0.142705	0.0529575	5.1596	0.173856	0.0478458	0.356141
ADH6	0.173069	2.10478	103.44	0.141524	0.00763412	0.518387
ADI1	0.252485	-31.3679	5477.37	0.0726025	0.000790578	-0.64609
ADK	0.214095	3.06222	488.421	0.105843	0.00924032	0.504792
ADO	0.231983	3.24837	728.151	0.0899212	0.00180393	0.608425
ADORA1	0.255289	14.8548	519.91	0.0713184	0.0563153	0.334745
ADORA2A	0.446488	-0.0175033	66.004	0.000108087	0.0146166	-0.46958
ADORA2A_AS1	0.118889	5.07724	325.02	0.197164	0.188348	-0.135726
ADORA2B	0.241599	2.60839	98.4226	0.0851914	0.00429471	0.556275
ADORA2BP	0.437749	-0.0178053	3.92218	0.00597343	0.0188822	-0.450069
ADORA3	0.350083	-3.51054	808.606	0.0244198	0.256707	0.0532651
ADPGK	0.444106	1.98856	3205.17	0.00159996	0.152765	0.177847
ADPGK_AS1	0.241599	-0.124297	12.8057	0.0837043	0.0511662	-0.34678
ADPRM	0.437749	0.348018	197.31	0.00303953	0.00488695	0.548251
ADSL	0.163196	11.7664	1488.68	0.155578	0.000303945	0.687989
AFMID	0.335245	-5.95679	1486	0.0308758	0.00346419	-0.570092
AGA	0.0824485	5.22336	657.087	0.229365	0.000627615	0.657679
AGAP1	0.187653	-20.7007	2896.64	0.128691	8.67599e-05	-0.732339
AGAP1_IT1	0.123209	-0.522376	39.7256	0.194587	1.46601e-05	-0.787387
AGAP10	0.190981	-0.0265874	1.89082	0.126214	0.0384704	-0.382101
AGAP11	0.32971	-0.0698063	7.39922	0.0332264	0.0936338	-0.25909
AGAP2	0.391959	-0.440559	186.2	0.011315	0.152765	0.177847
AGAP2_AS1	0.446488	0.0365922	31.4408	0.00134263	0.117104	0.218855
AGAP3	0.410358	4.53622	4020.17	0.00918462	0.0210173	0.440161
AGAP4	0.422842	0.166889	34.9461	0.007887	0.00561079	0.539114
AGAP5	0.181909	-0.221783	18.9381	0.134363	0.000650684	-0.65545
AGAP6	0.226028	-3.11289	520.535	0.0944766	0.0310947	-0.406285
AGAP7	0.0414526	0.46472	7.26067	0.277164	0.0182604	-0.45331
AGAP8	0.0342481	-1.93137	151.646	0.290435	0.000449499	-0.673057
AGAP9	0.136906	-0.379886	30.5531	0.177626	0.00322002	-0.575664
AGK	0.243059	5.55635	1131.64	0.0785982	0.0102589	0.496323
AGL	0.444106	0.357274	870.885	0.00156844	0.0106	-0.494095
AGMAT	0.350083	6.28188	867.532	0.0236427	0.0327806	-0.40116
AGPAT1	0.170676	4.08129	799.894	0.147589	0.00324887	0.574772
AGPAT2	0.386844	5.56338	2779.41	0.0133827	0.109622	-0.22933
AGPAT3	0.226028	17.7972	3995.57	0.0955912	0.0969881	-0.248273
AGPAT4	0.446488	0.252363	345.869	0.00124049	0.0675057	0.309339
AGPAT5	0.000188096	11.6444	845.632	0.544354	0.0575007	0.330734
AGPS	0.113945	20.4157	2013.61	0.201068	3.3889e-05	0.762649
AGXT	0.243059	-2.77904	208.042	0.0785879	0.000140136	-0.715847
AGXT2	0.422842	7.70125	1675.59	0.00781869	0.0184638	-0.451973
AHCY	0.21843	20.9918	3994.37	0.102661	0.0190632	0.449076
AHCYL1	0.471713	0.259659	5597.75	7.54228e-06	0.375792	-0.0127034
AHCYL2	0.231268	-8.94194	1278.16	0.0910254	0.0128514	-0.479386
AHCYP2	0.30612	0.0228096	2.17147	0.0467397	0.37275	0.0147157
AK1	0.422842	0.19134	139.92	0.00785602	0.120921	0.212615
AK2	0.338097	-17.7561	6356.31	0.0282262	0.0734354	-0.296635
AK3	0.350083	5.00255	1547.23	0.0243818	0.213143	0.107644
AK3P2	0.218558	-0.0669713	4.32232	0.102416	0.0108157	-0.492252
AK3P3	0.352341	-0.052735	11.3726	0.0222833	0.147813	-0.183865
AK3P5	0.315563	-0.0504267	6.25765	0.0423646	0.00985437	-0.499945
AK4	0.437749	7.35077	4823.67	0.00337875	0.0274849	-0.41832
AK4P1	0.338097	-0.110504	18.0656	0.0281831	0.00281473	-0.583687
AK4P3	0.318671	-0.0259434	3.35888	0.0389378	0.0356691	-0.391678
AK4P4	0.437749	0.00667473	1.17162	0.00420018	0.080498	-0.282264
AK5	0.308273	0.425726	37.8962	0.0458782	0.00645691	0.529976
AK7	0.350083	-0.457292	88.7733	0.0246828	0.177347	0.152663
AK8	0.293755	-1.1665	158.734	0.0531268	0.0377686	-0.384667
AK9	0.316211	-2.3271	418.554	0.0410503	0.0327806	-0.40116
AKR1A1	0.408761	-20.4098	7652.25	0.00958905	0.0366261	-0.388233
AKR1B1	0.315563	89.7874	6749.79	0.0423622	0.0708711	0.302653
AKR1B10	0.354005	-0.920904	116.253	0.0213902	0.277022	-0.0407846
AKR1B10P1	0.437749	-0.00532404	1.21279	0.00552475	0.197178	-0.122527
AKR1B15	0.308905	-0.130561	10.0903	0.0452746	0.145716	-0.186859
AKR1B1P1	0.363519	0.0117572	1.02023	0.0193095	0.0659901	0.314078
AKR1B1P7	0.23639	0.0542871	1.34107	0.0874986	0.00446964	0.553831
AKR1C1	0.352341	4.04841	949.722	0.0221999	0.0647628	-0.317808
AKR1C2	0.437749	-0.996278	292.156	0.00380202	0.151076	-0.180968
AKR1C3	0.446488	-3.42405	5119.98	0.000755658	0.172766	-0.158235
AKR1C4	0.209816	-0.659734	45.8171	0.111002	2.4892e-05	-0.770346
AKR1D1	0.441132	0.0119356	3.72123	0.00190788	0.0870523	0.269412
AKR7A2	0.218728	25.9738	2031.62	0.101324	0.1916	0.131937
AKR7A2P1	0.211089	-0.160419	13.5387	0.109356	0.00151201	-0.615831
AKR7A3	4.41745e-05	19.8046	-30.5437	0.592398	0.204996	0.114999
AKR7L	0.00182082	4.68262	-4.64012	0.456951	0.0969881	-0.248942
ALAD	0.00862527	12.4691	1293.16	0.372055	0.0135921	0.474928
ALAS1	0.190981	5.71716	706.421	0.125649	0.002097	0.599956
ALAS2	0.384816	-0.171604	25.62	0.0139281	0.348475	-0.0207266
ALDH18A1	0.446488	1.18455	3202.96	0.000423007	0.0655347	0.316025
ALDH1A1	0.0792191	229.262	5974.06	0.233253	4.90331e-06	0.817697
ALDH1A2	0.376778	-0.487779	146.791	0.0154195	0.239811	-0.0697572
ALDH1A3	0.350083	1.80432	245.528	0.0232316	0.00172279	0.610431
ALDH1B1	0.100524	5.4043	382.661	0.212495	0.000128475	0.719413
ALDH1L1	0.0866394	36.5336	1238.82	0.224792	0.253434	-0.0592825
ALDH1L1_AS1	0.419224	0.0172851	2.41893	0.00806364	0.3153	0.0266811
ALDH1L1_AS2	2.34282e-05	1.64675	-13.313	0.619418	0.0278142	-0.417206
ALDH1L2	0.226028	-4.65014	335.993	0.0948101	0.00985437	-0.499666
ALDH2	0.173069	49.5056	5163.66	0.141308	0.00182829	0.607757
ALDH3A1	0.276013	0.793152	69.9542	0.0602743	0.0176867	0.455539
ALDH3A2	2.18101e-07	126.111	1082.96	0.74476	1.44666e-06	0.851573
ALDH3B1	0.219084	-22.5731	4131.67	0.0997988	0.12417	-0.208157
ALDH3B2	0.241599	0.0217421	0.528037	0.0813632	0.0655347	0.316088
ALDH4A1	0.351306	-12.8036	2194.18	0.0224484	0.018784	-0.450636
ALDH5A1	0.0768716	17.0875	701.452	0.237425	1.73198e-06	0.838201
ALDH6A1	0.000574187	20.7831	402.078	0.501125	0.213143	-0.10809
ALDH7A1	0.0263946	33.3003	2501.75	0.307919	0.00398911	0.561846
ALDH7A1P1	0.0213076	0.141306	5.4674	0.324519	0.00392506	0.563183
ALDH8A1	0.437749	-2.0434	642.305	0.0039171	9.87403e-05	-0.727213
ALDH9A1	0.00290137	44.0487	1464.46	0.43053	3.41907e-05	0.762203
ALDOA	0.315785	-511.369	99248.6	0.0419227	0.0037701	-0.565635
ALDOAP1	0.340583	-0.0197473	2.65172	0.0267893	0.180046	-0.150101
ALDOAP2	0.186824	0.071392	2.77558	0.129782	0.0290076	0.412795
ALDOB	0.123812	43.9722	74.7618	0.193114	0.0823557	-0.279474
ALDOC	0.43516	-6.77082	2135.81	0.00647891	0.0448501	-0.363495
ALG1	0.20973	-6.94162	1103.72	0.111314	0.0129425	-0.478717
ALG10	0.146805	-0.726355	104.428	0.168853	0.000337291	-0.683977
ALG10B	0.315563	-0.32082	121.257	0.0426486	0.155271	-0.174282
ALG11	0.437749	-0.105574	158.397	0.00273207	0.187291	0.138623
ALG12	0.255289	-3.64574	755.04	0.0709154	0.00556475	-0.53956
ALG13	0.317849	-3.62668	1402.06	0.0394449	0.0108157	-0.492312
ALG13_AS1	0.130337	-0.349509	26.4553	0.185991	0.000525083	-0.666148
ALG14	0.0208847	3.43978	304.151	0.325835	0.00090405	0.640295
ALG1L	0.415331	-0.0222718	9.27584	0.00880403	0.182156	0.144417
ALG1L10P	0.332625	-0.0543275	13.5719	0.0312942	0.277022	0.0394474
ALG1L11P	0.446488	-0.00362453	2.37789	0.00051583	0.180995	0.148506
ALG1L12P	0.336243	0.0258829	2.65727	0.0291958	0.00290512	0.580854
ALG1L13P	0.0986438	-0.797725	53.9618	0.214676	1.59062e-05	-0.784044
ALG1L15P	0.446488	0.00259174	2.10083	0.000811304	0.3028	-0.0325748
ALG1L2	0.446488	-0.0141668	15.7121	0.0013422	0.018784	-0.450636
ALG1L3P	0.28214	-0.0105383	0.953518	0.0578336	0.151195	-0.18017
ALG1L6P	0.160966	-0.938801	64.8483	0.158921	0.000119132	-0.721864
ALG1L7P	0.187653	-0.147124	9.27795	0.128542	0.000320609	-0.685743
ALG1L8P	0.153769	-0.0723646	6.21685	0.163699	0.012531	-0.481606
ALG1L9P	0.246171	-0.0555122	9.18694	0.0769075	0.180995	-0.148429
ALG2	0.255289	3.90549	1019.66	0.071114	0.445367	0.00111433
ALG3	0.437749	2.20635	1491.27	0.00380975	0.0998451	0.243816
ALG3P1	0.258403	-0.0155561	1.15542	0.068844	0.0534524	-0.341456
ALG5	0.387378	-3.2675	1538.91	0.0125826	0.151923	0.179407
ALG6	0.348646	1.39864	580.357	0.0250513	0.088205	0.267885
ALG8	0.437749	1.00262	1054.64	0.00508422	0.100955	0.242033
ALG9	0.212042	-1.92214	328.735	0.107272	0.000748228	-0.648764
ALG9_IT1	0.32971	-0.0159981	2.71121	0.0328886	0.445367	0.00289855
ALLC	0.350083	0.0334288	4.74852	0.0235998	0.256707	-0.0537168
ALOX12	0.32241	-0.639671	220.783	0.0377511	0.0406182	-0.37553
ALOX12B	0.241599	1.60743	54.2215	0.08502	0.00161676	0.613328
ALOX12P1	0.0821138	0.0278315	0.27085	0.230124	0.224107	0.0928573
ALOX12P2	0.312215	-0.805047	169.628	0.044364	0.273835	0.0418989
ALOX15	0.437749	0.00927383	2.16096	0.00372134	0.0655347	0.315875
ALOX15B	0.226093	-2.96959	271.617	0.0928606	0.00679667	-0.526633
ALOX5	0.276013	-19.5856	3278.69	0.0601988	0.145158	-0.188545
ALOX5AP	0.4339	7.35668	1324.84	0.00696886	0.127514	0.204368
ALOXE3	0.287553	0.272653	7.60967	0.0557779	0.0067872	0.526804
ALPI	0.367973	-0.649334	55.272	0.0180543	0.0130842	-0.477915
ALPL	1.10149e-07	30.2427	-79.9684	0.758599	0.118737	0.21618
AMACR	0.318418	0.740941	189.716	0.0390997	0.256707	0.0523736
AMD1	0.031975	30.6803	1694.32	0.295016	0.00918499	0.505684
AMD1P1	0.437749	-0.00975061	3.73137	0.00543648	0.239811	0.0691193
AMDHD1	0.0597338	2.77607	54.9369	0.253491	0.0825297	-0.279029
AMDHD2	0.204764	-9.7105	1273.02	0.11438	0.0106107	-0.493872
AMPD1	0.293562	-0.32951	24.7625	0.0532648	0.185689	-0.140732
AMPD2	0.434333	-3.16755	2295.22	0.00669264	0.239811	-0.0815691
AMPD3	0.193664	-14.3053	1302.72	0.122167	0.000627615	-0.657679
AMT	0.305827	-5.79507	906.959	0.0482983	0.000469704	-0.671051
AMY2B	0.276013	3.83745	337.215	0.0602977	0.158647	-0.17027
ANPEP	0.316917	196.346	21655.7	0.0399149	0.00597418	0.535325
AOC1	0.441132	15.9091	6872.86	0.00184638	0.0671779	-0.310899
AOC2	0.131616	-0.49127	56.8426	0.184103	5.10125e-05	-0.749277
AOC3	0.433558	-2.25549	697.769	0.00717485	0.109622	-0.22933
AOX1	0.373212	11.7408	1923.27	0.0159333	0.0448501	-0.363941
APIP	0.165747	5.1564	707.193	0.151091	0.00124262	0.62514
APRT	0.241599	-44.4755	6234.73	0.082744	0.00937192	-0.503678
ARG1	0.446488	0.0034652	5.31356	0.00024111	0.256707	0.0530422
ARG2	0.217945	-4.70758	348.828	0.103452	0.00428962	-0.556497
ARSA	0.272053	-15.7898	3335.61	0.0627408	0.00699681	-0.524628
ARSB	0.292079	-5.85321	1489.77	0.0544348	0.00214311	-0.598173
ASAH1	0.303105	35.4672	5708.11	0.0492374	0.0946626	0.255628
ASAH2	0.4339	0.0292466	6.67279	0.00695363	0.00741236	0.520438
ASAH2B	0.243059	0.359608	125.359	0.0789389	0.2272	0.0873636
ASH1L	0.446488	0.283967	2271.36	0.000211766	0.0450095	-0.362827
ASH1L_AS1	0.125535	-0.909719	106.6	0.19141	0.00036686	-0.681303
ASH1L_IT1	0.207711	-0.0518503	4.26045	0.112774	0.0149251	-0.467983
ASL	0.102998	-6.27313	1300.92	0.208787	0.000456131	-0.672388
ASLP1	0.441132	-0.115499	74.3119	0.00190864	0.0848369	-0.273457
ASMT	0.446488	-0.00327834	4.87003	0.000369311	0.138507	0.194117
ASMTL	5.96757e-06	8.97188	555.106	0.659213	0.000504243	0.668154
ASMTL_AS1	0.243059	-4.86339	488.348	0.0788146	0.0343985	-0.395365
ASNS	0.183065	-15.4273	2318.9	0.132994	0.26486	-0.0461333
ASNSD1	0.163196	9.38896	1004.02	0.155136	0.000641159	0.656119
ASNSP3	0.415331	0.0131465	1.54989	0.0087304	0.808354	-0.000115157
ASNSP5	0.20973	-0.0424635	2.88851	0.111186	0.00281473	-0.583594
ASPA	0.0501907	46.1488	289.386	0.26533	0.0698943	-0.304881
ASPDH	0.258347	-5.48896	456.857	0.0691079	0.000986098	-0.636061
ASRGL1	0.314755	8.33896	894.875	0.0429881	0.158844	0.169601
ASS1	0.315563	22.6591	2462.48	0.0425702	0.256707	-0.0548251
ASS1P1	0.28982	-0.509915	41.0549	0.0551126	0.0333021	-0.399154
ASS1P10	0.247269	0.0663536	4.41498	0.0757252	0.117902	-0.217614
ASS1P12	0.446488	-0.00765649	12.4802	0.000678599	0.152765	0.177625
ASS1P2	0.226028	-0.197753	24.2973	0.0958481	0.00719638	-0.522399
ATIC	0.267806	12.3347	2229.37	0.0645252	0.0127511	0.480277
ATP6AP1	0.446488	-1.17585	6203.42	0.000325981	0.117807	-0.218186
ATP6AP1L	0.231983	-1.96482	338.796	0.0896939	0.0537945	-0.340763
ATP6AP2	0.316211	-17.7812	6608.66	0.0408834	0.197178	-0.122577
ATP6V0A1	0.173069	-24.5972	4109.79	0.141426	0.000893869	-0.641187
ATP6V0A2	0.0263946	-3.99189	710.362	0.308178	0.00409274	-0.559395
ATP6V0A4	0.178979	0.0882214	1.96497	0.137108	0.00611829	0.53384
ATP6V0B	0.255289	-29.4779	5714.46	0.0708886	0.0290076	-0.412749
ATP6V0C	0.129935	-0.655775	61.4901	0.187267	0.000229161	-0.698018
ATP6V0CP1	0.160966	-0.183339	12.906	0.158587	0.0067872	-0.526868
ATP6V0CP3	0.437749	-0.00642806	1.52906	0.00566231	0.37275	0.0158132
ATP6V0D1	0.193664	-23.4839	4130.1	0.12207	0.0218069	-0.437041
ATP6V0D2	0.336243	0.27781	19.1681	0.0289638	0.0107863	0.492535
ATP6V0E1	0.226028	-28.249	6351.8	0.0944688	0.00761159	-0.51861
ATP6V0E1P1	0.134495	-0.137226	9.82766	0.181679	0.00214311	-0.598217
ATP6V0E1P2	0.170676	-0.0995734	8.39015	0.146808	0.0168401	-0.459328
ATP6V0E2	0.350083	-3.95677	1253.22	0.0232413	0.185689	0.141297
ATP6V0E2_AS1	0.338436	0.206348	46.2288	0.0271193	0.0107569	0.492758
ATP6V1A	0.391959	-5.28995	3007.7	0.0114095	0.0949711	-0.254959
ATP6V1B1	0.446488	0.0550239	32.7944	0.0013675	0.0364711	-0.388902
ATP6V1B2	0.254343	25.3908	4229.93	0.0718289	0.104601	0.236461
ATP6V1C1	0.24692	-19.0112	3374.82	0.0763192	0.000413117	-0.676845
ATP6V1C2	0.437749	0.103216	62.3302	0.00322887	0.135354	0.196568
ATP6V1D	0.0107039	10.8608	1143.89	0.360941	0.0450869	0.362381
ATP6V1E1	0.391959	-5.42933	4866.38	0.0113806	0.0776905	-0.287943
ATP6V1E1P1	0.369955	0.00988636	1.45352	0.0171787	0.0520378	0.344935
ATP6V1E2	0.279289	-1.18655	341.887	0.0593595	0.398111	-0.00713173
ATP6V1F	0.241599	19.0417	2285.99	0.0853059	0.00281191	0.58391
ATP6V1G1	0.268594	10.6206	2546.12	0.063945	0.218057	0.102519
ATP6V1G1P2	0.389287	-0.0253621	3.89735	0.0115415	0.145158	-0.188612
ATP6V1G1P4	0.238753	-0.0917484	10.3775	0.0866245	0.0154805	-0.464454
ATP6V1G2.1	0.350083	-0.120288	19.3795	0.0247362	0.204312	-0.115668
ATP6V1H	0.241599	-16.8466	2313.13	0.0842202	5.32563e-05	-0.747271
ATP8A1	0.0362977	7.45919	420.716	0.284753	0.0364711	0.389125
ATP8A2	0.267806	7.8199	201.401	0.0646355	0.00107512	0.631826
ATP8A2P2	0.294221	-0.0868394	7.03555	0.0528861	0.176439	-0.154745
ATP8B1	0.190603	14.1365	637.837	0.126726	3.10457e-05	0.764878
ATP8B2	0.376208	1.83455	793.553	0.0156067	0.00731818	0.521285
ATP8B3	0.247052	-17.5466	1803.75	0.0760951	0.0725393	-0.298641
ATP8B4	0.293562	-3.5279	436.962	0.0533847	0.00988843	-0.498998
ATP8B5P	0.326442	-0.154633	28.8929	0.0355379	0.145158	-0.187654
AUH	0.0483656	6.16843	535.051	0.267593	0.239811	0.0726545
B3GALNT1	0.0251823	14.7149	788.66	0.311081	0.000310446	0.686874
B3GALNT2	0.32241	0.624538	199.099	0.0378771	0.00652383	0.529085
B3GALT1	0.103951	0.193699	5.96297	0.207027	0.0115409	0.486963
B3GALT2	0.266478	-0.13877	22.6384	0.0660863	0.0608725	-0.324939
B3GALT4.3	0.201887	2.01569	251.607	0.117484	0.000625373	0.657902
B3GALT5	0.24919	8.72189	257.381	0.074462	0.0333021	0.399154
B3GALT6	0.437749	-1.28713	1455.98	0.00358828	0.216663	0.103856
B3GAT1	0.359419	-0.403566	101.419	0.0205951	0.146873	0.184756
B3GAT2	0.30612	-0.169916	21.4569	0.0479786	0.0382574	-0.382884
B3GAT3	0.241222	-22.899	3815.87	0.0856134	0.0127845	-0.480054
B3GNT2	0.437749	-1.11878	1277.15	0.00430725	0.145158	-0.188099
B3GNT3	0.446488	-1.50182	1336.42	0.000902073	0.209705	0.110096
B3GNT4	0.0233669	-14.1094	932.457	0.317076	7.16051e-06	-0.807891
B3GNT5	0.32971	2.66588	455.069	0.0322652	0.0231778	0.431692
B3GNT7	0.394732	-0.738447	227.767	0.0108689	0.262708	-0.0476934
B4GALNT1	0.243599	4.42295	163.337	0.0777409	0.00102236	0.634278
B4GALNT2	0.350083	-0.0557361	5.77654	0.0241076	0.0322753	-0.402785
B4GALNT3	0.376835	0.528784	75.3468	0.0152798	0.00960234	0.501895
B4GALNT4	0.24919	-13.785	1491.44	0.0739441	0.0606082	-0.325385
B4GALT1	0.11785	-69.9232	7925.69	0.198511	0.00111792	-0.630043
B4GALT2	0.437749	4.11687	2003.58	0.00620339	0.0453121	0.361489
B4GALT3	0.437749	0.684363	1401.37	0.00387143	0.120865	0.21306
B4GALT4	0.295837	-8.06248	1562.76	0.0517641	0.0106107	-0.493649
B4GALT5	0.243059	-22.6409	4319.32	0.0786116	0.00260574	-0.588144
B4GALT6	0.3353	2.69539	227.033	0.0306542	0.00201572	0.602631
B4GALT7	0.205642	-31.5586	3368.71	0.113757	0.000448611	-0.673502
BAAT	0.241222	1.99545	46.3333	0.085582	0.00512112	0.545131
BBOX1	0.0986438	56.3599	987.179	0.21484	0.219474	0.100958
BCAT1	0.329897	12.5802	1607.99	0.0318721	0.00996101	0.498552
BCAT2	0.369955	-5.27426	2026.25	0.0167016	0.00934549	-0.503901
BCKDHA	0.123812	0.132158	8.72198	0.193018	0.000787655	0.646313
BCKDHB	0.446488	-0.263456	601.612	0.00062189	0.0356691	0.391799
BDH1	0.146805	-2.06307	191.374	0.169687	0.00324887	-0.574772
BHMT	0.446488	5.39213	2901.25	0.00106445	0.00109056	-0.631158
BHMT2	0.446488	-3.67871	5617.71	0.000335922	0.201742	-0.117451
BLVRA	0.426004	3.37238	2114.12	0.00740582	0.0481505	0.355472
BLVRB	0.316211	22.9411	3751.79	0.0415407	0.0356691	0.391799
BPGM	0.350083	2.18238	783.726	0.023271	0.0149378	0.467797
BPNT1	0.446488	-0.357313	976.845	0.000989771	0.3028	-0.0291955
BST1	0.437749	0.48276	343.639	0.00353422	0.176906	-0.154224
BTD	0.185238	2.19051	384.828	0.131856	0.239811	0.0739916
C1GALT1	0.241599	-8.80878	1901.87	0.0810056	0.0714932	-0.300424
[truncated: 2,150 more rows]

## Sheet: SNR total carbon
	Pearson correlations				Spearman Correlations
[truncated: 2,567 more rows]
