# Supplementary material for: Deconvolving metabolic intratumoral heterogeneity in clear cell renal carcinoma with hyperpolarized 13C-pyruvate MRI
Source: Research Square preprint supplement (doi:10.21203/rs.3.rs-7989219/v1), 2026-01-29
Supplement: Supplementary file 4 [file 8f50438421f4f252773d44ec.xlsx]

## Sheet: Sheet1
		Patient ID	TB18.5780	TB18.5780	TB18.5780	TB18.5780	TB18.5780	TB18.5780	TB18.5780	TB18.5780	TB18.5780	TB18.5780	TB19.03264	TB19.03264	TB19.03264	TB19.03264	TB19.03264	TB19.03264	TB19.03264	TB19.03264	TB19.03488	TB19.03488	TB19.03488	TB19.03488	TB19.03488	TB19.03488	TB19.03488	TB19.03488	TB19.03488	TB19.03488	TB19.03529	TB19.03529	TB19.03529	TB19.03529	TB19.03529	TB19.03529	TB19.03529	TB19.03529	TB19.03529	TB19.03529	TB19.03529	TB20.00210	TB20.00210	TB20.00210	TB20.00210	TB20.00210	TB20.00210	TB20.00210	TB20.00210
		Biopsy ID	n1	n2a	n3b	n4	t1	t2	t3	t4	t5	t6	n1 site 1	n1 site 3	n1 site2	t1 sit 3	t1 site 4	t1 site5	t2 site 1	t2 site 2	NL1	NL2	TL1	TL2	TL3	TL5	TL6	TL7	TL8	TL9	nl1	nl2	tl1	tl2	tl3	tl4	tl5	tl6	tl7	tl8	tl9	n1a	n2a	n3b	t1	t2	t3	t4	t5
Metabolite name	KEGG ID
2-aminobutyrate	C02356		1.33	2.099	2.187	0.974	2.669	1.912	2.008	3.238	2.318	1.575	5.353	6.591	6.607	6.887	6.527	4.716	8.826	6.862	4.071	3.513	9.087	8.036	8.1	6.511	9.311	7.647	4.874	3.222	2.058	5.104	6.527	6.139	6.165	7.92	5.982	6.88	3.144	8.262	8.216	2.788	4.533	2.462	9.294	9.415	6.627	5.448	5.311
2-hydroxyphenylpuruvate	C01179		0.022	0.016	0.019	0.009	0.019	0.055	0.047	0.017	0.029	0.025	0.015	0.03	0.019	0.041	0.047	0.082	0.054	0.037	0.018	0.006	0.162	0.116	0.251	0.064	0.129	0.109	0.081	0.055	0.018	0.019	0.03	0.014	0.008	0.035	0.017	0.01	0.131	0.021	0.03	0.004	0.013	0.004	0.02	0.022	0.008	0.012	0.018
3-aminobutyrate	NA		2.781	6.852	7.363	3.804	49.791	4.496	4.251	46.339	40.001	47.384	0.634	0.394	0.231	15.384	2.954	0.656	9.86	4.664	0.317	0.175	0.017	0.129	0.372	0.197	0.157	0	0	22.864	6.383	12.998	3.888	6.519	8.56	0.448	0.044	0.301	0.119	0	0	0.387	0.472	1.54	15.938	16.761	5.694	10.546	8.806
5-deoxyribose	C00673		4.863	6.984	4.749	3.752	3.155	1.444	1.334	7.168	5.206	1.761	1.492	0.653	0.64	3.2	4.408	1.068	7.295	6.208	3.557	1.435	8.23	5.527	10.725	11.483	13.76	3.57	4.521	9.755	3.861	3.428	0.449	0.273	0.362	0.438	0.841	0.995	0.185	0.822	1.533	0.652	0.847	2.116	8.561	9.685	14.606	2.956	0.558
6-PG	C00345		35.652	25.118	24.265	8.026	10.384	2.464	2.916	10.168	11.834	19.414	21.433	25.625	17.044	34.31	42.383	13.961	33.144	52.84	84.137	64.075	16.849	19.01	23.808	25.662	28.672	20.35	10.956	32.971	52.648	44.145	11.987	13.435	5.954	5	8.452	4.232	7.983	5.362	3.29	61.79	54.877	83.898	80.996	97.526	58.206	54.574	43.322
acetyl asparagine	NA		0.238	0.254	0.224	0.2	5.623	0.544	0.476	3.553	3.787	1.349	0.405	0.45	0.452	8.242	9.203	1.347	11.294	8.732	0.397	0.536	0.297	0.787	0.364	0.451	0.341	0.249	0.226	5.797	0.369	0.628	0.261	0.478	0.752	0.507	0.133	0.333	0.103	0.163	0.076	0.553	0.759	0.606	5.897	6.962	4.945	4.167	2.442
acetyl aspartate	C01042		53.064	60.961	62.187	35.388	2.553	0.867	1.387	2.288	2.535	1.418	53.199	46.919	52.497	2.941	2.43	0.535	2.511	2.471	92.643	116.641	16.77	24.592	13.608	5.144	7.249	20.1	28.164	5.656	62.258	76.288	42.881	16.992	41.117	2.509	7.076	1.588	1.631	1.323	1.275	68.406	93.363	96.147	3.232	3.872	1.297	2.554	1.441
acetyl cysteine	C06809		0.303	0.229	0.053	0.043	0.025	0.019	0.027	0.168	0.048	0.029	0.032	0.045	0.056	0	0.021	0	1.233	0	0	0.035	0.431	0	1.009	0.756	1.245	0.045	0.04	3.776	0.111	0.054	0.013	0.016	1.668	0	0	0	0	0	0	0.185	0.408	0.288	0.063	1.592	3.526	0.045	0
acetyl glycine	NA		0.065	0.092	0.12	0.075	0.413	0.482	0.637	0.454	0.479	0.21	0.129	0.391	0.192	0.239	0.259	0.493	0.291	0.234	0.135	0.186	0.424	0.414	0.343	0.252	0.301	0.315	0	0.407	0.152	0.211	0.429	0.379	0.303	0.639	0.52	0.61	0.563	0.611	0.519	0.177	0.095	0.228	0.244	0.234	0.174	0.307	0.392
acetyl-carnitine	C02571		20.011	21.184	18.663	13.205	44.739	15.983	19.606	42.793	42.292	62.006	22.097	9.955	9.21	57.411	41.403	23.726	59.325	52.437	14.02	22.48	27.416	48.388	51.491	41.719	40.551	25.339	17.617	74.869	19.033	40.111	15.115	5.686	28.837	24.168	19.607	32.887	15.226	11.265	13.225	6.818	11.634	9.445	60.262	66.796	41.168	52.938	53.775
acetyl-choline	C01996		0.025	0.015	0.015	0.009	0.008	0.002	0.003	0.003	0.005	0.006	0.029	0.061	0.031	0.03	0.075	0.008	0.015	0.046	0.048	0.062	0.034	0.052	0.025	0.01	0.04	0.064	0.09	0.009	0.014	0.019	0.011	0.004	0.011	0.006	0.013	0.009	0.008	0.019	0.004	0.032	0.032	0.038	0.015	0.017	0.015	0.038	0.047
acetyl-CoA	C00024		8.182	4.986	3.738	1.834	0	0.557	0.513	2.206	1.358	1.586	6.432	3.875	2.082	0	3.894	0.424	4.39	3.997	12.138	11.099	0.534	0.972	0.403	1.732	0.958	0.548	1.289	3.067	8.56	4.236	0	0.274	0.477	0.493	0	1.163	0	0.279	0.353	8.04	6.48	7.769	4.777	3.503	3.94	4.148	1.547
acetyl-glucosamine	C03878		13.67	16.764	14.876	9.566	3.727	1.012	1.034	4.292	3.7	2.772	17.652	12.726	13.806	3.562	3.203	1.442	5.939	2.662	30.165	26.121	10.096	10.638	8.967	5.876	10.408	13.746	8.985	9.406	20.813	18.96	8.658	7.528	10.196	3.76	7.257	3.829	10.499	12.728	2.019	15.244	20.387	19.32	3.939	5.846	4.68	2.727	1.945
adenine	C00147		2.986	4.059	5.306	2.103	1.795	0.213	0.41	1.23	1.902	0.95	1.471	1.143	1.3	3.133	3.46	0.965	2.688	5.108	2.633	2.842	2.549	2.89	2.777	3.94	2.637	2.226	2.356	1.488	1.322	1.199	2.729	3.569	3.623	3.24	5.981	3.701	2.965	2.168	1.905	2.345	2.59	2.744	7.92	7.843	6.746	4.096	1.523
adenosine	C00212		13.673	16.026	10.863	4.438	2.027	1.408	1.817	0.949	5.205	1.053	8.774	12.262	9.24	6.292	6.233	5.613	3.843	4.35	27.694	12.197	6.749	8.166	5.6	5.106	8.458	8.971	5.66	2.935	5.464	3.52	3.209	3.975	4.607	4.656	24.788	10.828	4.415	16.988	8.026	12.661	24.452	14.081	4.333	11.106	5.378	3.615	10.145
adipic acid	C06104		0.569	0.313	0.368	0.23	0.057	0.068	0.075	0.058	0.066	0.083	0.172	0.21	0.135	0.01	0.037	0.046	0.054	0.076	0.446	0.41	0.107	0.078	0.28	0.108	0.285	0.051	0.047	0.14	1.134	0.649	0.01	0.025	0.043	0.106	0.066	0.287	0.067	0.072	0.069	0.304	0.425	0.655	0.083	0.049	0.071	0.071	0.041
ADP	C00008		296.476	105.507	104.852	61.417	291.941	31.771	30.029	403.04	164.491	133.402	125.035	315.136	280.116	452.011	707.99	14.878	465.482	441.818	1161.84	1148.47	781.593	328.247	613.188	2569.97	1720.82	769.47	628.236	200.309	455.919	135.025	545.471	420.473	179.446	56.275	983.558	168.026	33.872	247.424	221.814	601.456	580.402	730.682	288.766	1368.55	1477.4	178.334	59.097
AKG	C00026		2.968	1.295	2.422	1.177	2.796	2.061	1.359	3.941	2.97	3.806	2.373	1.895	1.641	12.378	13.355	8.246	11.447	10.111	5.048	3.77	4.475	4.46	5.795	4.015	3.777	2.659	5.376	44.009	2.054	1.539	5.871	3.962	3.46	2.474	2.88	2.608	2.897	1.578	1.596	7.82	5.241	1.753	38.956	23.687	24.083	13.431	4.887
alanine	C00041		209.418	189.959	192.855	113.223	224.784	75.839	92.885	251.301	218.857	169.112	266.281	258.682	248.162	354.15	353.276	119.473	439.355	366.385	200.238	237.715	115.968	131.527	131.164	108.169	134.611	91.603	83.431	263.962	161.208	176.892	267.264	245.551	421.672	104.917	120.479	82.598	73.698	99.705	75.925	218.424	288.071	230.818	391.049	478.432	414.069	271.427	179.388
alpha acetyl lysine	C12989		0.42	0.431	0.443	0.288	0.615	0.036	0.031	0.251	0.35	0.073	0.896	0.866	0.89	9.121	4.77	0.443	9.435	4.393	0.364	0.474	0.036	0.035	0.034	0.015	0.027	0.035	0.037	0.469	0.261	0.309	0.014	0.009	0.016	0.018	0.006	0.021	0.012	0.01	0.011	0.925	1.322	1.049	7.947	11.574	9.331	4.99	2.493
alpha-hydroybutyrate	C05984		76.368	81.037	96.869	51.655	177.049	25.225	26.794	149.126	143.528	41.504	66.128	41.049	46.779	65.078	99.755	18.412	352.382	144.39	28.519	42.412	13.936	16.04	18.794	19.626	17.484	21.261	20.156	170.693	62.098	60.019	59.142	191.349	42.015	76.232	77.264	77.31	20.614	18.867	13.515	14.317	20.222	31.005	179.395	252.314	446.745	75.556	21.127
aminoadipic acid	C00956		1.338	1.902	1.77	1.231	11.832	1.409	2.207	5.919	7.231	2.563	1.948	1.755	1.658	21.277	10.515	2.355	23.855	11.007	2.765	3.226	1.815	3.489	3.021	3.11	2.533	2.235	1.401	16.934	3.578	6.014	2.87	4.589	4.316	7.319	6.711	3.27	12.007	9.236	2.164	1.178	1.646	1.485	18.973	25.801	20.443	15.74	8.515
AMP	C00020		598.217	260.623	236.366	175.852	446.665	46.879	41.145	366.475	258.042	156.819	185.94	255.88	366.968	339.858	1101.73	22.186	623.273	895.849	697.928	757.299	478.372	231.357	402.438	1183.72	872.789	341.951	353.06	98.496	664.84	383.107	989.171	2029.02	610.074	234.77	2185.07	303.468	80.889	510.577	339.226	400.823	312.817	568.853	109.765	1071.72	2039.06	81.172	32.563
arginine	C00062		50.636	44.895	45.748	27.43	60.446	33.133	42.699	69.655	70.232	26.983	89.132	91.268	89.568	117.522	83.547	40.597	132.005	75.796	59.47	63.275	143.124	116.85	118.573	80.576	111.369	120.299	99.218	85.304	86.527	98.08	119.739	114.367	117.953	93.574	107.435	77.649	58.497	67.466	62.721	56.495	78.382	72.483	225.38	320.851	287.245	167.622	108.78
Arginosuccinate	C03406		5.541	6.475	5.047	3.092	3.728	0.647	0.816	5.39	5.474	2.49	10.578	8.44	9.413	22.98	11.789	1.82	38.285	11.398	6.525	7.032	1.855	3.772	3.592	1.401	3.185	3.469	1.682	22.741	6.526	10.143	14.728	15.384	37.645	2.794	2.875	3.406	1.902	1.347	0.616	7.649	19.502	8.617	48.723	79.578	39.926	37.328	15.399
asparagine	C00152		21.833	18.605	17.97	11.284	19.859	14.463	14.917	23.698	24.544	20.827	26.667	25.892	25.611	22.278	22.867	14.05	27.496	20.778	28.519	31.003	90.853	79.455	77.764	65.627	78.038	71.106	60.662	40.381	42.235	44.605	120.454	112.209	119.935	50.996	77.085	43.889	34.85	49.198	37.051	23.121	34.223	31.47	29.124	35.735	26.989	23.846	17.801
aspartate	C00049		125.916	89.85	88.727	55.609	73.756	19.051	23.604	104.122	111.929	46.169	128.858	104.692	119.479	75.848	74.618	18.007	111.694	84.044	187.363	192.709	265.302	281.42	345.901	514.82	422.724	231.438	179.702	253.675	192.874	212.459	366.497	469.672	397.719	137.766	241.045	284.142	48.236	72.942	51.921	113.529	161.991	151.243	93.024	101.685	71.976	81.803	49.298
assymetric dimethylarginine	C03626		1.376	1.903	1.569	1.282	0.852	0.699	1.004	1.265	1.809	0.617	1.198	0.954	1.188	0.443	0.453	0.482	0.513	0.384	0.632	0.566	1.451	1.549	1.376	0.502	1.083	1.416	0.878	0.307	1.603	2.325	1.378	1.685	2.989	2.435	1.615	1.878	1.485	1.106	1.184	0.677	1.38	1.104	0.641	0.808	0.494	0.589	0.498
ATP	C00002		102.248	108.269	83.286	79.575	563.164	215.495	249.222	1213.62	331.453	1428.57	203.371	224.13	107.164	2000.92	1220.95	54.51	1160.19	1052.11	131.493	199.349	411.49	532.322	842.4	993.328	661.68	350.581	409.12	2194.58	114.222	90.666	184.533	94.255	513.111	75.297	623.388	473.023	86.014	231.243	297.996	142.988	195.515	124.406	1502.75	1225.21	194.483	1502.96	722.212
beta-alanine	C00099		21.717	20.257	20.729	11.038	66.625	7.004	8.082	84.324	61.922	67.516	24.048	23.768	20.947	159.619	85.045	9.154	158.328	85.283	46.332	44.388	74.147	74.122	113.246	105.41	90.777	48.058	46.695	464.604	23.628	29.226	61.835	61.965	32.981	6.264	18.284	5.683	3.408	5.109	7.697	27.455	34.312	29.182	106.62	136.927	79.186	70.69	39.014
beta-hydroybutyrate	C01089		277.098	258.684	277.114	162.627	290.931	185.6	249.916	313.654	287.856	125.962	104.047	104.811	77.586	73.507	61.075	65.126	87.005	49.623	64.929	75.452	74.088	79.376	84.137	56.789	75.031	59.436	59.629	72.758	400.471	362.479	542.28	1494.98	326.035	1048.94	427.488	958.338	512.217	449.204	339.623	40.344	50.972	48.125	39.732	47.673	44.07	35.53	35.664
betaine	C00719		26.204	24.202	21.477	13.91	21.583	8.598	10.051	15.91	14.718	15.853	25.156	28.307	24.047	42.854	35.025	11.25	42.163	40.408	48.407	47.369	34.031	38.199	36.116	60.471	47.419	33.482	34.225	162.697	26.112	29.819	29.123	23.595	26.166	15.166	34.26	15.152	4.51	6.987	11.739	28.094	33.473	28.788	57.038	72.736	50.89	49.053	42.936
BPG	C00236		2.992	0.673	0.176	0.212	2.582	0.971	0.263	51.99	5.951	20.732	9.278	16.738	5.046	11.836	6.998	0.377	11.821	5.566	5.638	6.969	9.762	4.135	5.369	4.764	6.495	4.302	2.005	6.428	20.488	3.364	4.142	10.392	5.421	0.788	2.796	1.285	0.317	0.874	1.518	21.729	8.63	11.938	9.64	13.536	23.296	32.091	2.173
butyryl-carnitine	C02862		1.883	2.178	2.426	1.482	3.765	0.706	1.084	2.781	2.523	3.203	1.597	1.495	1.937	2.052	1.965	0.273	1.474	2	5.316	6.569	4.69	4.243	5.134	0.038	4.252	3.555	4.447	2.147	2.691	3.125	2.197	0.659	1.234	1.412	2.012	1.527	1.033	0.952	0.887	0.489	3.119	3.329	0.057	0.032	0.013	3.604	0.043
carnitine	C00318		22.078	22.671	22.789	12.598	25.033	10.719	16.646	32.002	20.487	37.8	17.336	15.875	16.5	46.471	40.029	17.843	46.118	40.71	41.234	42.847	39.781	44.213	61.457	87.871	73.725	36.13	32.865	71.339	33.576	35.855	56.805	56.762	55.104	21.363	64.037	20.139	14.667	17.409	13.896	22.588	29.552	28.927	43.476	51.99	30.805	34.567	26.22
cdp	C00112		135.206	132.432	103.532	79.493	251.744	60.879	131.167	530.261	272.047	617.303	259.698	251.844	141.99	504.67	472.008	46.525	351.024	395.25	134.944	188.607	207.723	370.487	544.651	285.549	550.415	242.472	219.9	276.501	146.952	140.019	297.486	159.888	807.432	137.969	226.735	409.67	163.214	359.224	360.661	158.666	177.508	143.284	34.093	108.208	45.255	104.92	84.761
choline	C00114		39.726	37.479	32.191	19.514	16.466	10.892	14.561	24.554	23.225	22.198	43.328	41.246	41.682	26.635	24.37	19.372	25.997	24.033	95.106	85.704	69.919	72.403	47.186	33.73	44.58	48.513	78.791	36.385	34.336	33.956	73.747	78.18	68.185	26.701	54.971	23.47	39.976	46.492	20.587	66.962	82.524	73.351	24.392	31.139	22.508	23.626	25.748
citrate	C00158		28.676	39.15	4.142	27.053	33.422	42.233	51.282	53.956	67.568	69.393	35.315	57.055	43.853	70.051	135.619	25.091	77.883	131.379	13.178	25.402	6.096	15.706	9.732	4.413	6.718	10.998	3.182	42.956	41.105	49.736	12.973	17.667	15.022	54.457	18.884	40.67	28.153	44.218	31.934	16.205	15.333	18.874	43.473	66.713	16.646	63.988	67.771
citruline	C00327		1.836	1.489	1.593	1.018	5.242	6.122	6.196	5.544	7.375	2.637	1.444	1.874	1.68	3.805	3.094	4.631	3.255	2.237	2.221	1.676	15.372	7.678	8.439	4.134	7.724	7.462	5.811	2.2	1.855	1.869	1.87	1.884	1.453	4.39	2.118	4.139	9.847	4.193	4.117	2.115	2.75	2.203	7.008	9.986	8.062	8.247	5.342
CMP	C00055		11.235	9.432	8.173	3.774	6.767	1.568	2.47	11.56	6.758	12.751	7.185	7.281	6.549	7.672	11.933	0.796	7.298	13.759	6.66	6.97	4.461	6.547	8.844	4.355	9.068	3.162	4.055	6.232	11.218	14.31	17.462	21.532	24.409	7.58	9.427	12.879	5.547	9.422	6.945	5.49	7.103	6.486	2.925	6.244	2.677	2.446	1.839
Creatine	C00300		140.11	100.08	95.86	59.81	65.39	39.94	48.92	73.57	66.92	40.42	107.24	132.4	130.96	104.21	67.95	73.38	49.62	59.48	407.09	270	869.72	185.77	302.81	558.16	622.93	478.15	280.3	146.09	148.67	109.69	490.3	444.4	566.74	111.1	246.95	87.59	76.36	335.77	6661.39	309.76	166.97	184.5	108.31	116.91	98.41	52.99	50.4
CTP	C00063		2.098	2.388	1.347	1.388	5.699	2.106	7.66	20.812	4.382	42.077	7.776	9.792	3.474	41.961	32.212	1.614	25.416	23.649	3.283	3.221	17.155	19.369	35.781	12.043	23.847	13.728	10.849	50.474	1.805	1.17	2.945	0.24	11.357	0.263	3.319	9.004	2.609	11.594	16.941	2.521	5.689	2.333	9.548	4.473	0.908	25.257	14.356
cysteine	C00097		45.908	22.906	3.154	1.604	1.483	1.333	1.774	9.305	2.066	0.408	1.316	0.857	0.716	0.909	0	0.889	23.636	0.771	0.356	0	10.28	0.707	10.814	17.412	20.608	1.615	3.266	27.702	2.963	1.456	0.748	0.793	54.152	0	0	0.502	0.432	0.391	0.425	0.953	1.652	0.328	0.756	13.979	116.975	0.331	0.652
cystine	C00491		20.481	16.438	15.401	1.324	5.843	2.264	5.594	1.293	5.806	2.932	6.872	19.321	13.45	5.338	13.67	16.597	15.479	15.654	169.961	88.074	6.529	2.756	6.776	9.269	26.265	2.534	3.927	1.17	35.128	62.074	6.42	0.388	0	0.801	4.411	1.355	2.817	2.125	2.22	127.408	241.947	235.748	65.323	88.071	95.992	36.772	49.262
cytidine	C00475		0.14	0.059	0.302	0.211	0.069	0.009	0.062	0.045	0.1	0.025	0.091	0.026	0.148	0.077	0.057	0.129	0.026	0.125	0.074	0.266	0.159	0.144	0.189	0.226	0.049	0.293	0.313	0.077	0.108	0.104	0.282	0.181	0.12	0.75	0.323	0.484	0.614	0.505	0.679	0.224	0.044	0.132	0.396	0.058	0.071	0.189	0.112
cytosine	C00380		2.15	1.894	1.934	1.34	0.895	0.836	2.939	2.808	3.009	1.491	3.452	4.136	3.09	3.708	3.749	0.983	1.973	1.465	5.557	3.133	0.837	2.309	0.098	0.851	1.019	1.618	2.417	0.692	4.345	1.537	1.72	1.409	1.485	10.587	3.593	2.982	1.957	9.04	8.368	5.058	7.739	5.502	0.15	0.197	0.413	0.503	0.682
DHAP	C00111		1.18	0.848	2.025	1.833	2.527	1.894	4.457	2.035	6.998	2.814	6.648	4.572	5.871	3.974	4.029	4.121	1.239	3.798	2.581	7.139	14.891	25.275	21.995	13.945	7.093	29.051	23.394	11.311	2.299	3.13	0.673	0.534	0.896	8.352	1.349	14.051	0.929	0.351	3.39	2.414	0.713	2.463	14.329	1.307	0.975	9.063	8.662
dimethylglycine	C01026		1.056	0.818	0.836	0.519	0.748	0.386	0.433	0.874	0.645	0.69	0.269	0.382	0.359	0.593	0.755	0.246	0.56	0.758	0.926	0.712	0.482	0.425	0.425	0.305	0.34	0.372	0.32	0.717	1.137	1.313	1.022	0.767	0.592	1.108	1.059	0.884	0.767	0.853	0.711	0.397	0.428	0.451	1.962	2.401	1.63	1.723	1.579
epsilon acetyl lysine	C02727		0.238	0.269	0.237	0.196	0.131	0.113	0.139	0.21	0.24	0.105	0.163	0.161	0.168	0.195	0.127	0.087	0.19	0.137	0.016	0.059	0.389	0.423	0.283	0.148	0.248	0.279	0.222	0.003	0.231	0.332	0.205	0.212	0.233	0.283	0.22	0.243	0.239	0.183	0.192	0.176	0.245	0.226	0.2	0.39	0.248	0.18	0.129
Erythrose-5-p	C00279		9.688	12.833	5.079	3.953	6.023	0.656	1.044	7.315	7.607	3.773	12.386	7.349	9.125	9.698	8.142	0	12.969	9.923	8.799	11.448	13.443	13.763	15.697	9.676	10.592	12.789	12.867	15.36	9.706	8.28	13.599	13.251	44.367	8.856	5.405	16.315	9.591	5.704	3.215	7.947	10.511	10.613	8.065	20.766	6.76	6.114	3.08
ethanolamine	C00189		31.85	35.935	31.385	17.219	10.645	4.657	5.376	11.909	12.463	7.296	38.802	45.713	37.117	29.337	24.274	7.008	29.333	18.624	66.243	42.113	28.546	33.484	37.041	34.432	41.054	32.401	36.564	26.26	45.453	43.675	46.76	48.797	29.795	39.287	64.383	37.266	44.178	51.553	17.618	37.093	62.666	44.702	15.735	27.541	22.912	14.576	12.029
FAD	C00016		2.211	1.451	1.421	0.756	0.481	0.045	0.053	0.456	0.294	0.342	1.359	2.097	1.478	0.451	0.849	0.046	0.765	0.617	3.526	3.117	0.875	0.38	0.666	1.386	1.138	0.76	0.671	0.551	1.804	1.22	0.652	0.728	0.573	0.197	1.261	0.189	0.13	0.329	0.254	2.226	3.189	3.19	0.62	0.956	1.207	0.282	0.135
FBP	C00354		29.8	13.794	5.848	7.962	129.401	17.78	17.241	189.544	112.557	166.716	96.553	77.561	75.475	319.842	141.848	6.267	302.868	212.048	19.802	55.791	598.377	550.223	705.385	886.338	885.922	752.618	360.136	356.38	45.27	23.304	54.064	46.001	52.528	108.955	92.338	202.452	4.186	3.482	45.679	20.976	18.161	25.266	449.123	405.834	324.115	354.378	131.132
Fumarate	C00122		25.172	35.919	26.833	13.647	16.882	18.597	7.157	13.993	18.653	13.672	30.547	36.654	35.98	23.579	37.103	7.742	64.332	48.496	29.184	19.941	6.49	10.493	11.16	7.303	11.423	5.881	4.747	35.967	18.229	24.752	24.472	27.35	20.926	15.838	13.386	17.454	8.636	6.41	4.809	20.582	38.793	23.184	31.409	40.457	18.975	23.749	13.332
g1p+f6p	C00103		11.932	9.982	5.644	5.021	104.699	6.091	6.338	63.106	79.119	37.976	33.723	34.895	24.994	167.18	111.066	7.306	264.503	107.212	19.827	12.152	188.875	112.578	209.257	293.806	315.706	274.483	185.123	192.71	11.21	6.302	11.145	13.486	10.098	29.501	51.866	66.878	14.124	9.804	13.825	6.866	9.385	12.24	152.419	209.481	273.502	93.271	35.024
g1p+f6p	C05345		11.932	9.982	5.644	5.021	104.699	6.091	6.338	63.106	79.119	37.976	33.723	34.895	24.994	167.18	111.066	7.306	264.503	107.212	19.827	12.152	188.875	112.578	209.257	293.806	315.706	274.483	185.123	192.71	11.21	6.302	11.145	13.486	10.098	29.501	51.866	66.878	14.124	9.804	13.825	6.866	9.385	12.24	152.419	209.481	273.502	93.271	35.024
GABA	C00334		33.986	43.333	38.072	26.016	19.875	2.871	8.117	17.856	14.91	11.045	45.648	32.224	35.77	34.443	17.67	15.125	30.809	29.374	28.945	36.44	1.275	3.469	2.627	1.48	1.485	0.971	2.013	29.299	28.144	29.623	9.196	10.529	6.766	2.566	2.732	1.232	2.979	1.874	1.484	18.888	28.441	34.422	27.263	32.606	14.476	24.211	16.404
gamma-hydroybutyrate	C01991		34.584	32.41	34.753	19.433	35.954	29.616	39.081	41.584	37.714	20.47	49.61	56.111	42.784	89.815	60.532	52.752	58.301	51.19	24.71	32.092	24.681	28.048	30.28	20.339	25.57	19.292	21.169	25.65	124.875	94.734	84.16	270.182	35.338	300.93	125.893	252.376	76.79	97.736	87.14	14.706	18.386	18.337	16.594	18.026	12.84	16.837	19.28
GAP	C00118		19.561	10.26	10.045	8.541	22.26	6.946	12.86	55.765	20.007	58.181	46.78	69.519	45.994	71.398	76.401	12.296	83.419	62.913	42.522	56.707	84.541	50.722	53.494	57.484	74.922	133.07	77.294	50.636	44.971	35.525	70.179	62.832	36.509	13.978	227.624	13.526	7.128	21.65	24.174	42.499	45.674	45.37	76.201	82.886	63.885	70.598	39.905
GDP	C00035		44.65	48.868	31.096	25.661	65.031	7.904	12.49	76.565	54.588	77.04	42.559	40.41	25.658	81.041	92.603	2.417	63.976	97.65	29.161	44.791	22.01	47.19	47.627	49.982	38.274	14.626	30.799	44.622	47.977	40.75	91.492	87.837	302.78	40.21	102.8	96.652	29.584	33.483	36.65	26.244	34.309	28.036	26.549	57.631	21.724	35.391	18.622
gluconic acid	C00257		9.098	9.33	6.302	5.509	18.656	11.526	13.514	41.379	18.735	36.423	8.701	7.129	8.876	10.994	11.365	5.17	14.113	7.843	8.917	13.159	23.094	19.486	43.027	57.722	55.8	23.476	15.255	64.872	10.738	10.036	4.488	2.903	3.677	2.682	6.545	3.606	2.402	2.384	1.774	9.545	14.138	12.998	11.698	16.633	16.607	8.034	3.349
glucose-6-p	C01172		6.347	5.208	5.137	3.563	23.377	4.722	3.883	24.032	28.264	20.612	8.365	8.985	8.238	31.79	15.051	2.799	35.509	14.441	18.535	12.263	61.169	37.579	62.003	71.843	52.369	90.15	102.855	39.505	7.588	6.791	4.162	4.627	6.156	10.877	16.448	17.18	2.334	2.741	5.933	6.543	10.349	10.364	19.907	16.226	12.952	17.657	5.673
glucuronic acid	C00191		42.477	11.128	6.662	5.737	1.179	2.236	4.889	4.471	7.891	5.218	6.535	7.208	7.97	2.4	3.265	4.096	2.086	2.182	18.097	12.374	7.816	6.737	8.516	3.917	7.597	17.496	5.041	1.745	16.204	16.199	1.267	1.043	2.737	13.378	2.766	19.492	9.3	10.866	4.624	14.829	23.443	13.813	2.895	2.554	1.272	1.925	1.995
glutamate	C00025		740.605	666.272	663.341	342.817	469.718	116.169	215.113	547.643	674.453	498.545	478.295	548.339	522.602	1113.99	1003.42	228.149	1295.04	949.139	1230.31	1176.17	1204.77	1179.46	1290.58	1539.56	1335.23	1101.81	939.768	1822.62	757.223	840.431	1582.58	1565.46	1368.21	743.832	1311.33	804.795	514.379	601.526	431.997	946.087	1268.29	1301.1	1480.63	1846.56	1645.54	1107.28	638.796
glutamine	C00064		32.441	31.33	31.017	20.127	130.9	92.305	112.533	138.976	152.57	109.187	25.512	27.109	26.767	202.969	152.366	97.39	204.728	147.387	31.612	32.538	157.672	188.054	141.345	182.049	138.607	182.541	167.807	227.236	37.439	53.669	259.744	282.461	266.339	273.031	369.409	244.499	153.632	284.633	195.353	26.303	36.942	32.967	222.539	253.74	246.88	178.611	152.241
glyceric acid	C00258		2.875	2.61	3.015	1.326	1.597	1.005	2.774	1.509	1.495	2.281	5.18	7.201	8.428	2.536	3.025	1.25	2.677	2.402	20.787	47.794	14.431	18.132	14.782	12.652	15.187	21.862	15.411	6.839	4.462	7.834	11.273	7.722	1.967	10.334	6.994	7.426	15.597	20.215	14.256	34.873	35.846	34.871	13.788	6.214	6.187	15.571	20.652
glycerol	C00116		1.734	1.196	1.475	0.669	0.507	0.125	0.133	0.316	0.357	0.127	1.333	1.223	1.31	0.409	0.321	0.152	0.736	0.34	2.54	1.972	0.851	0.439	0.659	1.782	1.279	0.661	0.418	0.762	0.771	0.612	0.694	0.709	0.196	0.294	0.817	0.246	0.22	0.338	0.198	1.566	1.679	1.754	0.411	0.534	1.43	0.278	0.144
glycerol_phosphocholine	C00670		70.381	64.705	63.996	40.67	206.403	56.993	84.16	260.21	171.841	158.035	76.192	66.738	73.956	263.226	285.254	58.162	293.064	274.271	52.378	56.562	133.243	119.707	124.847	117.15	103.837	125.434	96.139	143.819	78.525	87.622	102.176	138.778	93.702	98.956	273.793	115.826	47.394	105.164	118.433	41.588	61.379	57.67	129.717	197.187	167.169	106.111	62.941
glycerol-3-phosphate 1	C00093		140.213	102.731	141.783	65.698	462.841	107.147	179.053	790.143	423.346	688.654	199.598	186.383	180.446	406.463	516.495	119.345	481.302	495.015	186.569	199.712	354.888	289.242	421.602	326.713	369.646	275.959	320.754	483.283	187.896	145.359	139.922	225.117	255.074	268.343	382.276	434.977	79.059	253.322	265.15	179.207	243.694	250.98	397.907	415.064	307.221	327.255	160.555
glycerol-3-phosphate 2	C00093		586.982	467.006	393.735	269.886	274.17	29	32.125	272.276	175.579	110.08	765.175	878.582	840.297	438.573	499.555	47.096	535.91	497.229	791.932	1105.18	69.969	68.075	67.086	276.58	86.464	90.98	112.443	345.581	810.546	717.542	163.755	154.297	182.875	32.484	109.424	31.878	29.627	42.953	31.202	761.533	871.294	888.825	466.388	601.06	533.36	353.246	202.069
glycine	C00037		271.541	222.83	223.211	97.187	139.41	74.897	77.043	199.871	206.755	133.626	191.709	225.117	233.341	320.828	297.258	75.026	300.269	200.936	337.076	315.352	452.133	374.572	389.95	329.734	377.919	308.016	381.233	229.383	294.828	282.658	384.009	419.081	392.518	189.016	307.606	145.026	156.945	182.175	131.024	257.691	334.893	321.865	335.446	462.818	309.607	258.58	152.632
GMP	C00144		77.918	66.936	81.051	52.904	47.645	6.254	7.038	40.787	37.878	60.109	54.428	47.715	40.388	33.775	74.558	2.46	32.824	99.365	65.14	99.197	41.374	41.202	64.303	38.002	61.966	25.841	27.369	16.188	104.574	124.247	160.829	282.537	412.807	64.565	181.421	73.142	50.585	48.257	21.296	68.951	58.925	77.472	13.993	76.045	35.646	11.798	4.627
GSH	C00051		56.934	76	2.085	8.352	185.005	0	0	322.221	110.163	187.523	10.088	0.717	0.797	407.652	15.055	0.589	681.242	44.113	4.523	1.044	749.921	618.808	612.944	944.017	704.272	471.03	584.718	1100.9	13.621	4.096	408.232	721.228	710.933	2.264	405.876	1.266	0	0	0	0.142	0	0.1	144.57	590.983	656.598	2.809	0.704
GSSG	C00127		357.1	190.467	287.388	390.3	1217.9	451.839	189.53	1170.8	974.256	1818.86	418.416	223.347	232.218	2618.59	2720.87	138.615	1531.82	1718.93	73.509	406.418	1415.93	1320.82	1600.87	1625.14	1290.2	1044.45	1300.59	1256.54	310.192	80.521	1768.79	1625.97	1098.15	818.115	2961.53	1197.28	360.306	960.139	769.079	98.465	19.984	105.466	1750.72	1603.52	1244.11	1661.49	663.747
GTP	C00044		18.034	20.643	10.832	11.558	71.332	10.037	23.338	123.981	46.853	171.332	37.768	38.158	13.86	260.44	207.199	3.053	128.782	155.042	20.752	23.315	45.803	61.743	69.396	77.73	54.346	42.271	38.851	172.451	19.733	11.557	44.757	16.054	130.071	16.263	80.401	67.469	17.924	32.239	46.585	17.837	26.928	13.12	135.525	88.058	18.778	161.435	73.573
Guanine	C00242		0.179	0.049	0.195	0.113	0.007	0.01	0.07	0.089	0.047	0.004	0.131	0.16	0.248	0.117	0.105	0.205	0.079	0.215	0.197	0.07	0.582	1.26	0.331	0.25	0.311	2.183	0.179	0.008	0.144	0.146	16.243	13.053	22.725	6.594	11.294	6.461	6.318	4.425	4.825	0.369	0.402	0.368	0.145	0.164	0.064	0.152	0.025
Guanosine	C00387		6.423	7.415	5.519	2.185	3.863	1.165	3.869	4.032	11.136	1.898	5.346	7.936	5.18	6.999	4.462	4.066	3.626	3.932	17.963	6.823	16.092	19.438	10.674	6.578	9.767	16.693	12.519	3.1	4.673	3.982	28.009	20.269	39.421	30.475	27.755	28.253	17.465	19.675	11.981	7.309	14.939	8.351	4.481	5.394	1.444	4.56	6.039
hippurate	C01586		31.398	37.603	29.225	26.724	5.005	6.31	8.028	12.983	19.714	3.529	50.68	40.821	44.395	3.515	3.92	2.404	3.162	2.185	19.345	15.777	1.08	0.547	0.668	0.184	0.684	0.601	0.511	0.947	8.617	7.232	0.071	0.06	0.056	0.19	0.109	0.135	0.134	0.167	0.143	17.567	23.73	33.451	1.537	1.317	0.963	1	0.801
histamine	C00388		0.515	0.186	0.33	0.159	1.789	0.489	1.858	1.724	3.016	2.068	0.632	0.53	0.883	1.936	1.973	1.528	2.242	1.734	6.019	4.754	28.894	31.019	8.079	8.261	23.051	36.053	32.641	10.406	1.173	1.448	0.044	0.036	0.038	0.211	0.094	0.033	0.069	0.067	0.038	2.456	1.401	2.683	25.568	36.486	19.087	25.173	14.162
histidine	C00135		71.219	64.635	61.724	39.876	51.175	34.366	37.311	56.544	53.574	36.778	94.289	97.58	94.171	65.45	79.298	29.818	84.48	77.905	63.447	64.291	84.506	72.771	63.941	50.727	62.535	61.976	56.105	49.811	73.78	72.807	72.801	66.764	73.016	53.16	65.779	44.19	37.711	42.51	35.443	67.678	93.396	79.219	82.311	99.92	94.597	63.195	52.072
homocitrulline	C02427		0.786	0.76	0.704	0.478	0.134	0.13	0.157	0.16	0.26	0.063	0.198	0.172	0.197	0.033	0.04	0.011	0.063	0.038	0.559	0.418	0.095	0.086	0.097	0.077	0.084	0.065	0.066	0.009	0.164	0.191	0.095	0.059	0.098	0.11	0.091	0.087	0.074	0.08	0.056	0.289	0.345	0.402	0.078	0.051	0.045	0.068	0.074
homocysteine	NA		1.806	1.705	1.563	0.88	1.352	1.262	1.445	1.684	1.352	0.936	1.769	2.119	1.802	1.745	1.524	1.19	2.003	1.229	2.077	1.694	1.602	1.245	1.252	0.825	1.764	1.293	1.119	1.144	2.862	3.627	2.827	2.127	4.286	3.151	3.219	2.47	2.52	2.822	2.335	2.81	4.02	3.725	3.354	4.251	3.433	2.573	2.158
hydroxyhypurate	NA		89.244	56.175	228.929	118.26	173.818	22.704	73.056	31.567	223.017	99.849	259.161	478.818	157.97	276.713	644.233	25.809	39.65	316.665	386.549	183.837	194.42	154.731	106.863	85.616	68.434	181.747	93.653	2.981	222.239	713.628	538.252	129.562	120.093	1350.56	799.655	1883.28	783.821	892.88	1135.09	185.264	179.163	168.513	238.222	83.641	1.977	448.642	428.494
hydroxyproline	C01015		4.677	3.294	3.408	1.852	2.981	2.109	3.031	4.008	3.776	3.147	5.409	6.328	5.95	5.583	5.619	5.617	4.883	4.91	20.566	15.162	31.923	23.802	21.304	18.748	24.535	19.304	27.63	33.01	7.942	7.556	29.146	23.99	19.034	17.008	32.693	16.047	8.628	14.214	9.137	7.35	8.218	10.198	5.36	5.465	4.609	5.915	5.767
hypotaurine	C00519		1.846	13.808	12.335	6.52	92.561	9.186	11.586	114.533	68.879	61.437	8.298	0.974	0.904	29.779	5.535	2.175	24.826	8.739	3.053	1.799	5.94	53.595	58.463	34.875	12.431	6.375	6.747	217.434	4.486	18.473	82.312	180.868	107.159	10.967	5.558	14.7	3.893	0.42	0.862	1.303	2.486	2.096	137.195	165.585	15.113	108.312	65.564
IDP	C00104		0.623	1.171	0.841	0.7	4.174	2.307	2.009	7.303	10.068	10.24	3.083	2.49	1.726	12.535	5.056	2.871	12.218	4.083	0.542	0.738	1.485	2.728	7.772	2.739	2.296	1.078	4.782	41.102	1.137	1.567	0.61	0.716	0.609	4.789	0.936	7.988	2.683	0.501	0.731	0.628	0.747	0.766	13.541	4.953	1.788	8.562	3.995
IMP	C00130		12.326	9.567	11.288	7.699	17.086	5.151	2.53	30.459	15.075	27.233	11.776	14.014	8.569	17.17	36.777	4.513	11.233	34.957	28.217	45.146	11.903	20.631	12.564	15.523	13.12	19.79	14.875	39.019	30.149	29.602	10.935	12.575	23.545	7.925	40.838	17.088	6.686	14.024	15.007	17.859	16.658	21.233	14.053	24.276	11.043	13.003	4.655
indole-3-acetate	C00954		0.777	0.755	0.637	0.431	0.206	0.285	0.313	0.223	0.296	0.174	1.114	1.166	0.936	0.317	0.323	0.466	0.282	0.238	0.533	0.538	0.131	0.174	0.146	0.083	0.133	0.108	0.091	0.228	0.601	0.546	0.092	0.093	0.071	0.154	0.114	0.179	0.115	0.142	0.139	0.311	0.496	0.502	0.2	0.197	0.131	0.192	0.292
isoleucine	C00407		27.663	24.739	25.134	15.451	22.403	14.498	17.083	23.544	23.296	14.356	34.542	33.426	35.193	22.829	21.847	16.297	31.001	20.139	31.673	38.136	70.645	58.026	61.932	47.916	61.33	52.469	47.705	33.528	45.96	51.655	65.656	58.393	65.732	49.69	55.3	42.614	34.894	34.934	30.169	29.705	41.329	35.87	27.142	33.835	30.651	21.66	16.866
ITP	C00081		0.074	0.142	0.098	0.086	0.136	4.55	0.129	0.178	0.213	0.195	0.148	0.092	0.089	0.13	0.102	0.362	0.118	0.096	0.071	0.092	0.061	0.16	0.126	0.089	0.112	0.061	0.056	0.213	0.093	0.177	0.08	0.094	0.061	0.109	0.061	0.152	0.059	0.052	0.038	0.07	0.091	0.087	0.119	0.15	0.078	0.118	0.213
kynurenine	C00328		0.862	0.756	0.724	0.411	2.664	0.906	1.076	2.67	1.716	1.252	0.807	0.931	0.842	1.872	2.029	1.198	2.4	3.043	0.505	0.496	7.584	3.963	3.881	1.121	2.963	6.969	5.484	1.519	3.34	3.668	6.025	5.483	4.169	15.842	5.154	14.241	4.791	6.914	8.808	0.484	0.61	0.55	3.033	2.43	8.094	3.487	4.677
lactate	C00186		1927.95	2028.34	2140.54	1206.99	3553.18	1820.03	2044.18	3954.6	3624.95	2162.26	2505.95	2519.42	2192.37	3394.01	2809.32	1379.94	4903.9	2976.53	2264.21	3048.01	5550.66	6238.52	7483.1	6276.6	6481.25	5300.94	4450.84	5730.81	3011.99	3665.97	3741.22	3398.79	1889.25	3903.02	4460.57	3665	2454.83	2350.18	2196.47	2026.81	2889.54	2716.75	5065.25	7717.41	5508.51	3260.22	2395.07
leucine	C00123		71.804	63.492	63.773	38.037	61.508	42.677	44.17	66.901	60.771	42.279	95.4	97.723	91.532	57.574	58.633	41.636	79.156	52.649	81.201	93.332	169.709	152.69	153.876	114.152	149.543	133.746	346.968	90.853	118.958	129.667	155.516	144.197	148.441	116.462	134.308	99.654	80.091	88.516	72.228	78.442	112.358	95.82	69.454	86.32	78.311	54.949	43.806
lysine	C00047		115.586	102.53	161.906	68.552	115.979	77.802	80.729	122.12	117.135	74.515	282.024	205.615	189.939	289.239	157.064	85.94	252.483	195.63	153.432	162.503	229.694	193.565	186.153	129.744	175.973	183.217	159.215	143.55	188.025	189.829	132.171	122.897	186.907	137.547	267.305	114.817	122.662	103.811	155.017	148.703	198.771	171.762	438.95	567.882	488.895	306.291	185.995
malate	C00149		69.64	60.818	42.488	35.482	48.158	14.766	15.052	63.215	64.065	35.976	74.218	56.65	64.939	99.343	67.709	36.163	132.308	76.864	58.543	54.8	28.222	37.959	43.053	36.686	42.47	23.073	21.096	76.802	53.652	66.873	82.423	64.06	159.839	40.785	51.058	38.863	28.263	28.803	19.683	43.644	56.874	39.946	65.801	87.51	68.393	56.275	41.902
maltose	C00897		1.07	1.737	0.955	0.615	10.11	8.813	7.67	16.277	15.074	14.19	2.019	2.57	1.914	20.126	22.106	22.714	39.019	21.207	0.928	0.784	6.989	9.247	9.475	8.001	13.007	10.326	6.071	17.656	3.942	1.697	6.689	5.325	34.542	2.667	3.159	7.828	2.428	2.172	1.907	2.008	3.167	2.344	23.596	28.71	40.092	22.534	16.922
meso-erythritol	C00503		14.606	13.614	11.156	9.067	4.318	2.023	2.908	5.22	6.63	1.916	7.989	6.846	7.82	6.496	6.335	2.058	16.91	6.084	13.139	8.651	43.463	17.287	37.563	59.587	61.678	24.083	18.522	16.28	8.595	8.217	5.19	6.506	1.742	3.89	15.374	4.333	2.051	4.015	4.276	8.05	9.042	13.958	8.72	10.865	24.25	5.997	2.54
methionine	C00073		120.905	106.769	101.446	57.117	42.523	46.076	47.341	60.303	54.552	46.094	161.362	167.208	159.128	68.428	69.715	41.221	63.664	59.603	151.183	153.848	194.339	168.057	143.057	79.123	138.533	171.038	130.525	75.292	189.749	215.268	189.369	193.754	200.681	161.294	142.417	127.003	111.315	121.432	102.32	146.49	229.301	180.064	56.364	51.588	19.234	67.323	58.192
myo-inositol	C00137		645645	473544	444024	218847	80209	54527.7	151936	187909	232980	302787	418886	459393	518207	170126	134164	156820	191088	115048	1.25064e+06	1.04579e+06	771404	572076	682923	1.32496e+06	1.07358e+06	928012	468953	177857	528047	550702	1.02874e+06	2.22727e+06	1.408e+06	823950	2.28092e+06	1.41334e+06	220156	625431	526141	911643	1.07413e+06	1.12591e+06	473993	406460	302836	264163	153313
NAD	C00003		46.62	92.813	23.613	8.715	22.985	3.207	5.975	22.348	11.356	20.505	36.792	42.009	28.362	52.283	89.676	1.086	43.526	37.462	143.158	74.872	36.937	7.7	17.868	26.761	25.31	12.296	15.73	33.032	52.085	37.968	22.869	32.983	15.832	3.589	50.367	8.926	6.298	10.701	8.729	59.765	85.187	91.199	38.62	108.52	58.62	23.089	15.673
NADH	C00004		106.793	142.187	131.994	82.699	153.832	20.047	44.909	154.004	82.927	130.032	122.228	93.933	91.636	167.766	106.94	21.951	180.015	152.315	164.96	180.501	69.599	28.074	65.933	160.633	88.031	22.098	60.375	234.39	106.557	139.712	56.985	56.137	104.983	25.423	103.365	37.681	28.264	44.996	15.553	130.252	128.765	113.618	100.368	158.026	119.547	73.411	57.265
NADP	C00006		31.169	22.16	20.195	14.018	12.201	3.779	1.98	16.462	8.867	13.481	19.059	29.591	23.533	14.359	17.899	3.407	16.546	15.517	37.56	40.641	10.28	5.19	12.533	30.013	18.338	2.175	5.137	14.817	26.576	21.114	6.104	7.597	10.776	2.586	14.826	4.888	1.052	2.846	3.427	28.508	34.974	37.792	16.449	25.502	19.618	10.718	4.035
NADPH	C00005		4.127	4.319	1.187	0.909	2.341	1.413	0.28	2.906	1.289	2.132	3.658	5.302	3.794	5.923	13.793	0.753	4.712	2.833	7.032	4.635	1.125	0.786	2.046	1.486	1.514	0.614	1.138	1.478	2.747	3.261	2.469	3.349	1.519	0.389	1.94	0.889	0.188	0.562	0.803	4.334	5.413	5.2	0.544	0.988	0.484	1.365	0.529
octanoyl-carnitine	C02838		0.027	0.025	0.023	0.018	0.109	0.045	0.063	0.081	0.051	0.082	0.039	0.031	0.042	0.1	0.065	0.033	0.042	0.081	0.255	0.26	0.14	0.11	0.155	0.147	0.208	0.169	0.138	0.146	0.049	0.047	0.136	0.031	0.091	0.093	0.036	0.09	0.033	0.067	0.084	0.151	0.172	0.158	0.27	0.146	0.094	0.426	0.643
ornithine	C00077		39.639	24.698	35.841	14.923	26.932	18.639	16.428	24.064	23.33	21.575	37.398	38.15	36.345	46.935	41.42	15.53	53.673	49.717	36.418	42.392	18.255	15.976	15.687	11.65	15.165	13.158	11.095	20.509	36.257	34.997	19.793	17.525	19.046	17.178	16.447	10.585	25.068	9.318	12.28	36.168	46.354	39.593	47.111	61.492	70.346	38.121	27.805
palmytoyl-carnitine	C02990		2.903	7.197	7.367	3.872	11.197	4.995	12.138	14.672	7.702	9.091	8.03	0.513	3.884	12.318	6.812	2.128	10.458	9.822	9.418	12.728	12.744	28.377	20.525	4.33	5.863	7.894	9.586	11.098	2.594	7.259	3.606	1.284	16.211	13.264	1.32	13.291	9.271	1.008	2.674	4.159	6.62	5.673	39.197	19.142	2.226	20.847	14.035
PEP	C00074		0.997	0.919	0.959	0.88	1.354	1.871	2.382	3.283	3.898	3.653	3.801	4.299	3.689	3.218	1.767	2.299	2.568	1.696	0.472	1.62	1.956	1.949	3.311	2.742	1.65	1.537	2.394	6.886	5.412	5.136	0.713	0.855	0.733	5.478	1.656	4.793	5.505	0.659	1.95	2.035	1.147	2.042	8.673	2.034	1.273	4.526	2.787
phenylalanine	C00079		37.803	33.972	33.336	19.764	28.715	22.191	21.19	31.992	29.776	20.365	48.95	47.236	44.65	29.151	29.629	21.045	39.604	26.239	45.901	50.201	88.391	77.55	76.924	55.162	74.368	71.356	59.859	45.471	63.779	68.142	73.469	66.795	69.667	53.303	66.558	46.972	40.235	43.152	34.427	40.344	58.558	50.243	34.652	44.281	39.785	27.09	20.569
phosphocholine	C00588		117.538	126.56	135.607	82.724	237.794	56.201	80.456	252.813	166.142	88.999	135.227	128.659	132.867	370.752	236.013	55.343	393.424	281.058	122.155	179.771	121.181	152.286	190.671	303.807	230.278	121.145	113.956	302.891	138.818	173.63	95.289	82.273	73.89	73.253	62.47	51.225	32.206	17.63	65.615	92.485	122.521	113.68	319.693	349.01	228.674	241.29	184.523
phosphorylethanolamine	C00346		130.587	156.538	119.864	100.071	99.84	13.682	25.667	56.978	126.302	90.405	140.115	106.546	102.799	141.482	121.468	45.866	118.393	107.309	259.586	376.223	277.074	392.876	384.358	380.622	358.519	271.728	357.572	308.2	175.05	228.167	128.201	140.979	190.16	88.809	88.797	122.982	23.204	10.185	42.321	197.19	208.821	258.089	375.96	404.96	280.529	296.1	218.818
phosphoserine	C01005		3.414	2.534	3.263	1.517	0.957	0.617	0.549	1.831	1.387	0.923	1.6	2.254	2.146	1.575	1.454	0.313	2.224	1.914	1.006	0.975	1.45	0.927	0.966	0.969	1.32	0.888	0.717	0.728	2.467	2.396	12.048	6.692	1.669	4.807	11.01	3.748	3.032	5.48	3.948	0.567	0.925	1.064	0.98	1.277	0.967	0.635	0.38
proline	C00148		54.373	47.698	48.409	29.094	58.474	43.213	49.984	63.654	59.34	43.838	72.234	72.621	69.589	63.173	56.891	48.316	71.543	52.175	53.317	57.227	215.982	166.762	195.04	167.985	208.223	153.806	150.902	70.322	70.691	73.566	311.983	235.979	305.914	132.407	251.518	142.218	94.845	110.056	75.831	51.776	72.115	63.261	62.189	73.143	59.935	55.837	48.943
propionyl_carnitine	C03017		3.586	3.306	3.116	1.903	2.137	0.301	0.333	2.127	1.477	0.942	2.554	2.086	2.121	3.535	4.47	1.155	5.275	4.576	6.033	6.447	3.234	2.993	4.406	7.296	5.612	3.587	3.904	9.651	3.719	4.644	3.064	2.113	2.15	0.787	2.102	0.941	0.409	0.508	0.4	1.854	2.828	2.657	3.998	5.44	4.147	3.549	1.221
pyridoxal-5-p	C00018		1.922	2.089	1.033	0.67	1.072	0.032	0.043	0.588	0.791	0.591	1.867	1.597	1.217	1.147	1.9	0.07	1.973	1.82	1.226	1.365	0.129	0.298	0.302	0.469	0.477	0.129	0.105	0.89	1.698	1.183	0.169	0.106	0.281	0.252	0.185	0.276	0.14	0.052	0.13	1.297	1.995	1.956	0.748	1.406	0.774	0.754	0.837
pyroglutamate	C01879		14.474	15.79	19.342	10.554	5.595	5.725	6.018	5.929	7.04	7.886	16.751	21.198	22.851	9.091	9.464	8.866	8.631	9.608	21.763	25.816	23.238	26.986	32.626	38.346	29.177	20.894	13.151	10.158	17.562	21.578	20.968	21.079	13.224	18.132	18.288	15.817	19.247	18.929	11.469	32.941	45.338	33.766	15.283	16.443	9.513	13.844	13.04
pyruvate	C00022		1.656	1.181	2.095	0.999	1.432	6.704	5.072	3.991	2.116	3.72	1.755	1.293	2.255	4.759	2.391	18.48	3.594	5.742	1.707	1.577	42.33	22.506	24.801	16.018	15.987	28.289	25.218	13.947	2.182	1.763	4.083	3.895	1.573	4.033	3.779	1.787	4.289	3.426	3.568	2.41	2.092	1.473	10.888	7.176	3.989	4.882	2.547
quinolinic acid	C03722		0.6	0.693	0.515	0.468	0.146	0.314	0.359	0.251	0.41	0.765	0.481	0.226	0.266	0.434	0.421	0.13	0.385	0.555	0.093	0.109	5.168	5.511	5.561	1.395	3.069	4.288	7.353	0.143	2.723	3.963	1.861	0.676	1.702	17.837	0.765	17.177	6.679	6.134	7.388	0.075	0.131	0.111	0.619	0.832	0.108	0.234	0.112
ribose-5-p	C00117		5.382	4.265	4.014	3.091	5.989	3.488	5.211	12.269	14.28	8.755	7.536	4.107	5.39	6.354	7.331	8.016	8.814	8.055	2.627	6.817	37.862	38.855	36.704	24.842	23.517	42.673	48.756	43.427	3.564	5.109	4.56	5.729	9.317	10.103	7.355	15.948	2.449	2.172	2.876	4.316	1.95	4.437	16.137	9.771	12.588	8.246	7.223
ribulose-5-p	C00199		8.138	6.114	4.529	3.041	9.422	3.43	4.702	14.114	15.653	10.933	9.062	8.078	8.42	13.502	10.273	8.264	17.15	12.296	12.517	13.315	61.394	43.336	51.372	50.325	46.132	80.253	50.115	40.445	5.614	5.986	5.911	8.711	12.267	9.93	6.673	13.887	2.099	0.951	3.114	11.861	11.356	14.018	21.428	23.982	22.411	14.158	7.632
S-(2-Succinyl)cysteine	NA		0.993	1.066	0.58	0.416	0.508	0.115	0.14	0.694	0.488	0.331	0.713	0.55	0.68	1.529	0.547	0.143	3.774	0.982	0.567	0.462	0.984	1.13	1.664	1.033	2.275	1.033	0.406	0.961	0.745	0.965	2.47	2.699	3.26	0.602	0.989	0.5	0.416	0.266	0.245	0.392	0.965	0.569	1.013	3.727	4.401	0.712	0.236
sedoheptulose-7-p	C05382		7.072	4.66	5.066	2.814	6.033	2.498	1.927	8.995	6.857	2.52	7.694	6.774	6.971	21.818	9.745	2.592	22.848	9.33	7.979	12.322	27.001	17.417	23.423	40.835	35.815	40.412	27.273	13.583	9.737	8.525	9.03	11.131	4.732	6.485	10.949	8.579	3.558	1.393	3.1	8.214	9.432	13.096	21.058	24.844	24.754	16.484	7.631
serine	C00716		75.139	70.643	64.476	38.722	65.222	27.435	34.387	73.606	58.965	37.125	67.552	71.64	70.572	51.689	59.473	24.43	73.783	54.119	75.809	81.529	135.263	114.066	111.107	104.126	112.778	113.097	99.922	140.912	115.701	124.116	114.884	103.752	117.275	76.882	78.142	84.027	72.147	68.427	50.353	80.058	122.627	88.573	88.894	107.903	101.269	66.467	46.18
sorbitol	C00794		6.927	10.318	9.098	6.285	5.099	3.98	4.039	4.997	6.045	3.876	11.254	9.629	9.509	45.342	86.382	43.632	64.522	42.652	3.262	4.813	14.706	21.851	41.027	33.78	29.596	6.94	11.252	58.105	238.717	278.899	17.663	9.608	52.318	73.504	24.979	59.436	47.707	45.085	42.089	4.896	8.298	5.607	13.605	18.898	14.705	11.537	8.53
spermidine	C00315		40.254	12.81	14.249	14.633	12.173	10.668	8.845	71.992	9.806	12.721	13.548	13.021	29.979	33.833	31.952	1.893	57.161	48.902	2.903	6.016	20.978	17.16	26.776	14.459	18.058	46.303	25.012	9.538	21.343	28.129	30.389	33.122	1.399	37.787	97.993	33.497	9.581	20.916	60.251	5.576	4.779	5.921	10.469	20.193	27.046	7.479	1.973
taurine	C00245		90.408	98.031	95.289	62.827	88.311	57.02	66.086	99.725	123.33	99.174	94.927	83.554	77.733	177.29	203.29	155.658	189.181	190.233	66.768	104.438	81.272	147.339	165.628	139.153	150.786	77.65	106.22	147.205	110.633	136.485	150.638	146.786	230.427	69.144	74.345	99.249	72.576	18.408	25.632	78.976	106.87	100.738	164.979	206.288	167.85	139.653	125.344
threonate	C01620		23.255	21.255	20.55	12.503	12.162	4.787	7.389	13.727	11.337	13.831	30.254	47.346	50.318	26.036	33.613	5.028	27.388	33.964	41.616	61.406	27.404	19.341	20.273	17.092	20.704	18.909	18.932	12.762	29.594	38.249	39.552	22.006	7.401	42.849	72.316	45.577	23.7	88.118	66.465	52.27	67.391	75.093	22.715	24.937	18.633	21.23	27.33
threonine	C00188		69.857	55.691	66.923	36.502	67.848	37.976	44.335	74.805	67.76	43.49	81.676	76.469	74.131	66.766	70.962	36.293	85.527	68.064	76.676	79.922	145.76	127.342	126.32	110.303	127.107	108.92	99.958	82.037	81.141	84.671	154.921	152.52	156.558	87.158	109.242	65.039	58.919	66.603	55.625	68.196	96.314	80.536	79.999	93.049	83.162	64.145	46.856
Thymine	C00178		1.128	0.677	0.779	0.555	0.423	0.249	0.281	0.542	0.891	0.335	0.86	1.329	1.389	0.268	0.486	0.435	0.396	0.393	1.052	0.797	0.162	0.196	0.106	0.096	0.116	0.179	0.183	0.705	0.503	0.607	0.061	0.046	0.054	0.13	0.051	0.164	0.111	0.224	0.218	3.243	3.981	2.463	1.349	2.278	0.654	1.538	1.118
trimethyl lysine	C03793		1.665	1.55	1.516	1.278	0.681	1.142	1.233	1.276	1.121	0.36	2.078	1.955	2.503	0.501	0.499	0.632	0.633	0.484	0.406	0.379	0.477	0.25	0.349	0.306	0.368	0.264	0.216	0.17	2.012	2.448	1.538	1.333	0.73	1.909	3.061	1.129	1.436	2.228	2.173	0.227	0.334	0.372	0.177	0.202	0.148	0.155	0.101
tryptamine	C00398		0.004	0.003	0.002	0.001	0.002	0.003	0.001	0	0.001	0.003	0.006	0.014	0.009	0.001	0.002	0.002	0.005	0.001	0.006	0.001	0.001	0.016	0.001	0.001	0.006	0.002	0.002	0.004	0.004	0.005	0	0	0.01	0.002	0	0.001	0	0	0	0.002	0.001	0.01	0.001	0.007	0.001	0.001	0.024
tryptophan	C00078		23.617	21.274	19.993	12.188	13.643	13.609	12.203	15.45	15.134	7.881	27.744	27.379	25.893	16.839	15.022	10.515	20.649	12.519	24.792	28.079	33.966	30.706	30.231	24.768	29.818	24.937	23.445	22.693	30.842	30.724	27.24	23.914	27.689	6.595	25.88	8.562	14.793	12.025	7.46	23.766	34.211	29.577	18.707	24.42	16.26	14.68	11.305
tyrosine	C00082		44.393	38.84	38.174	22.996	31.872	22.09	22.217	33.577	31.197	19.798	61.894	62.198	50.315	39.34	37.481	25.666	50.907	32.067	57.705	65.918	92.728	79.135	78.972	59.608	75.737	70.966	62.82	50.925	63.3	65.906	68.01	62.364	65.965	47.951	63.65	42.677	40.098	37.934	32.745	58.589	83.907	67.864	48.765	59.44	53.589	35.661	28.759
UDP	C00015		29.448	21.56	19.626	16.992	113.144	18.657	40.083	160.498	88.247	215.396	32.95	34.332	16.89	110.905	153.594	8.151	90.231	180.263	39.801	59.365	74.789	121.01	190.809	237.334	199.711	101.572	118.974	112.088	27.58	25.999	156.408	114.968	444.656	36.089	353.743	210.118	16.392	75.679	76.276	31.402	36.918	31.926	49.08	113.027	34.425	54.947	23.959
UMP	C00105		40.932	33.376	38.745	17.969	58.096	9.208	14.067	73.356	56.098	90.024	20.258	23.328	20.447	27.206	70.681	4.022	36.647	99.161	36.322	40.699	41.368	43.802	62.884	43.377	84.852	43.493	25.435	14.431	50.498	63.325	113.046	137.563	257.48	41.896	199.844	82.22	11.596	30.518	23.039	18.554	23.029	23.186	6.265	53.737	24.397	7.267	3.611
Uracil	C00106		47.585	34.876	36.791	21.877	13.558	4.118	5.991	19.516	18.769	10.5	36.066	33.939	40.571	9.855	9.676	2.451	18.52	9.286	17.382	16.266	30.399	36.466	10.818	6.141	14.099	27.49	16.208	7.292	53.687	53.181	65.267	56.154	44.723	11.163	32.525	10.348	14.649	10.189	4.948	37.405	48.485	48.595	7.551	25.19	32.995	6.05	2.248
Urea	C00086		4468.91	3439.55	3563.62	2157.11	1231.2	1437.04	1782.25	1657.76	1979.5	761.679	1767.89	2197.22	1992.97	1708.8	1674.05	1514.45	1556.49	1497.81	3171.6	2061.19	1878.52	938.195	1004.22	1072.24	1274.2	1539.47	1135.2	892.683	2192.94	2267.18	2577.29	1959	707.321	2428.14	3999.77	2057.47	2152.84	3702.98	3791.89	1208.52	1666.32	1595.98	750.207	992.54	951.744	716.598	593.717
Uridine	C00299		2.003	1.608	1.427	0.786	1.08	0.617	1.12	1.365	2.501	1.231	2.69	2.629	2.104	2.584	1.852	1.845	1.938	1.614	3.695	3.185	5.716	6.303	3.053	1.985	3.35	6.662	4.769	1.363	2.118	2.299	2.978	3.464	4.491	4.231	5.491	6.039	1.69	3.78	1.549	3.413	5.023	4.615	1.536	1.782	1.303	1.413	1.02
urocanic acid	C00785		0.149	0.243	0.11	0.145	0.066	0.136	0.071	0.135	0.122	0.067	0.092	0.088	0.063	0.026	0.034	0.148	0.04	0.03	0.053	0.013	0.043	0.022	0.048	0.028	0.012	0.011	0.004	0.031	0.1	0.164	0.034	0.015	0.028	0.067	0.039	0.063	0.019	0.024	0.009	0.101	0.152	0.226	0.006	0.046	0.034	0.052	0.018
UTP	C00075		5.517	6.412	4.544	6.199	58.224	13.544	52.52	140.916	36.424	281.806	14.829	19.325	7.173	268.964	189.486	6.32	128.464	148.73	10.167	12.513	78.546	88.32	203.354	83.054	92.19	56.204	43.136	326.642	5.185	3.571	16.567	3.043	45.165	5.109	71.955	65.955	4.7	33.246	32.925	7.636	11.674	5.932	184.013	124.454	11.332	171.283	86.953
valine	C00183		59.536	52.109	53.243	33.688	55.358	43.435	44.279	61.043	55.614	37.734	83.061	83.754	85.177	62.713	59.936	53.218	79.088	54.851	67.127	82.46	130.311	120.933	117.47	86.286	113.358	104.588	94.017	82.613	95.059	110.732	120.373	111.348	120.96	96.525	106.936	81.876	68.15	72.475	59.325	67.357	94.692	80.909	66.29	80.381	71.317	55.487	49.884
xanthine	C00385		6.213	4.139	4.714	2.571	1.8	0.447	0.61	1.955	1.802	0.799	6.445	6.587	6.246	1.846	2.669	0.389	3.377	2.166	5.343	7.728	2.599	1.788	2.126	1.982	2.982	2.261	1.446	2.596	5.276	4.795	5.808	6.48	9.822	4.684	3.799	4.527	4.337	3.888	3.563	6.335	7.222	6.72	2.678	3.887	4.379	1.577	0.646
xanthosine	C01762		5.026	5.308	5.049	3.394	2.108	0.439	0.569	2.165	1.917	0.734	7.703	7.445	6.574	2.346	2.958	0.417	4.845	2.951	6.126	8.04	2.141	1.973	2.383	2.017	2.431	2.041	1.249	3.985	5.271	4.98	5.04	6.727	5.861	4.647	3.381	4.903	4.727	3.399	3.559	5.634	7.924	6.615	3.105	4.619	4.22	1.864	0.616
Xpg	C00197		10.624	9.195	2.695	3.615	10.327	12.278	12.175	21.773	26.368	30.038	31.142	38.43	16.187	20.711	9.812	5.984	23.929	11.271	8.382	11.488	35.667	35.288	44.414	33.698	29.814	28.612	34.719	47.041	31.067	33.511	4.838	3.642	12.275	28.198	14.388	37.715	29.615	13.215	18.939	19.709	17.199	21.365	33.529	24.504	9.556	26.735	20.767
Xpg	C00631		10.624	9.195	2.695	3.615	10.327	12.278	12.175	21.773	26.368	30.038	31.142	38.43	16.187	20.711	9.812	5.984	23.929	11.271	8.382	11.488	35.667	35.288	44.414	33.698	29.814	28.612	34.719	47.041	31.067	33.511	4.838	3.642	12.275	28.198	14.388	37.715	29.615	13.215	18.939	19.709	17.199	21.365	33.529	24.504	9.556	26.735	20.767
xylonic acid	NA		10.134	9.736	8.133	6.098	6.33	3.272	5.432	6.682	6.294	5.309	12.274	11.536	12.789	21.284	14.135	5.324	16.013	14.072	13.592	14.826	12.871	13.458	12.102	21.827	14.937	11.374	10.944	26.307	9.495	15.98	24.682	21.039	15.246	20.999	28.713	18.271	10.747	15.849	20.012	12.931	13.981	15.953	19.241	16.901	11.107	20.489	12.61
xylulose-5-p	C00231		8.138	6.114	4.529	3.041	9.422	3.43	4.702	14.114	15.653	10.933	9.062	8.078	8.42	13.502	10.273	8.264	17.15	12.296	12.517	13.315	61.394	43.336	51.372	50.325	46.132	80.253	50.115	40.445	5.614	5.986	5.911	8.711	12.267	9.93	6.673	13.887	2.099	0.951	3.114	11.861	11.356	14.018	21.428	23.982	22.411	14.158	7.632
[truncated: 6 more columns]
