# Supplementary material for: Deconvolving metabolic intratumoral heterogeneity in clear cell renal carcinoma with hyperpolarized 13C-pyruvate MRI
Source: Research Square preprint supplement (doi:10.21203/rs.3.rs-7989219/v1), 2026-01-29
Supplement: Supplementary file 5 [file aa16c15c775f87787f049921.xlsx]

## Sheet: Kpl
		total genes	significant spearman	% spearman	average spearman rho	Standard Deviation spearman rho	significant pearson	% pearson	average pearson r2	Standard Deviation pearson r2	average pearson slope	Standard Deviation pearson slope
hsa00010	Glycolysis / Gluconeogenesis	62	32	51.61	0.191233	0.602766	30	48.39	0.317954	0.0969623	523023	946144
hsa00020	Citrate cycle (TCA cycle)	29	17	58.62	-0.178253	0.497124	11	37.93	0.29619	0.0913291	2721.51	106849
hsa00030	Pentose phosphate pathway	29	14	48.28	0.337564	0.505813	12	41.38	0.307453	0.0969334	345098	864979
hsa00040	Pentose and glucuronate interconversions	26	9	34.62	0.363743	0.479901	11	42.31	0.238934	0.0789468	18197.1	86296.5
hsa00051	Fructose and mannose metabolism	30	17	56.67	0.612335	0.157043	14	46.67	0.333366	0.124715	441284	926612
hsa00052	Galactose metabolism	28	10	35.71	0.566786	0.15689	10	35.71	0.29991	0.119569	108337	122520
hsa00053	Ascorbate and aldarate metabolism	22	9	40.91	-0.149958	0.612106	10	45.45	0.270137	0.108307	-19643.4	115144
hsa00500	Starch and sucrose metabolism	29	12	41.38	0.412676	0.42603	14	48.28	0.292668	0.0880522	31560.4	109834
hsa00520	Amino sugar and nucleotide sugar metabolism	46	23	50	0.338908	0.548742	19	41.3	0.328249	0.129028	90413.6	222662
hsa00620	Pyruvate metabolism	44	24	54.55	-0.120947	0.604871	23	52.27	0.301107	0.0975757	138766	471840
hsa00630	Glyoxylate and dicarboxylate metabolism	28	17	60.71	0.070473	0.604345	15	53.57	0.30223	0.094873	25817.4	149634
hsa00640	Propanoate metabolism	31	14	45.16	0.00511853	0.63262	13	41.94	0.325065	0.108517	131893	490210
hsa00650	Butanoate metabolism	26	17	65.38	0.292867	0.490446	15	57.69	0.286578	0.0775482	138075	318218
hsa00562	Inositol phosphate metabolism	72	33	45.83	0.139972	0.58875	30	41.67	0.299947	0.118492	79346	382300
hsa00190	Oxidative phosphorylation	97	46	47.42	-0.021744	0.564168	33	34.02	0.311771	0.10286	8479.36	73082.9
hsa00910	Nitrogen metabolism	17	6	35.29	-0.134698	0.608818	4	23.53	0.356116	0.0809667	386506	936817
hsa00920	Sulfur metabolism	8	3	37.5	0.301923	0.631571	2	25	0.342979	0.103252	91160.7	98721.5
hsa00061	Fatty acid biosynthesis	16	7	43.75	0.435796	0.384916	5	31.25	0.302013	0.135307	85016.7	146719
hsa00062	Fatty acid elongation	22	9	40.91	-0.0939334	0.551534	8	36.36	0.256658	0.0556574	-7199.46	49666.1
hsa00071	Fatty acid degradation	41	17	41.46	0.0134315	0.577476	14	34.15	0.269754	0.082249	-14977.6	119720
hsa00100	Steroid biosynthesis	20	10	50	0.397639	0.439942	7	35	0.352564	0.158328	150911	221249
hsa00120	Primary bile acid biosynthesis	17	10	58.82	0.379573	0.497364	9	52.94	0.325436	0.133927	73736.2	180319
hsa00140	Steroid hormone biosynthesis	47	17	36.17	0.405235	0.40154	15	31.91	0.292549	0.0932309	8660.66	17950.1
hsa00561	Glycerolipid metabolism	50	22	44	0.0899212	0.596766	24	48	0.293912	0.0952928	44786.6	133096
hsa00564	Glycerophospholipid metabolism	87	45	51.72	0.328761	0.512092	40	45.98	0.320028	0.118632	66079.1	141656
hsa00565	Ether lipid metabolism	39	24	61.54	0.229365	0.532376	17	43.59	0.294097	0.0944393	65733.5	210147
hsa00600	Sphingolipid metabolism	48	22	45.83	0.071251	0.579647	16	33.33	0.326714	0.132623	45416.5	96300.4
hsa00590	Arachidonic acid metabolism	54	29	53.7	0.322712	0.517915	20	37.04	0.327723	0.109074	64625.6	132238
hsa00591	Linoleic acid metabolism	25	17	68	0.448999	0.388717	11	44	0.33862	0.123025	13315.4	16679.3
hsa00592	alpha-Linolenic acid metabolism	21	16	76.19	0.416349	0.390671	9	42.86	0.277594	0.0838394	13459.6	16444.8
hsa01040	Biosynthesis of unsaturated fatty acids	23	11	47.83	0.244598	0.539776	9	39.13	0.2687	0.0888542	58450.6	103049
hsa00230	Purine metabolism	113	53	46.9	-0.0295411	0.58912	43	38.05	0.32356	0.0860514	20558.6	99007.3
hsa00240	Pyrimidine metabolism	54	28	51.85	-0.0278777	0.599487	24	44.44	0.316806	0.0878551	31363.2	133762
hsa00250	Alanine, aspartate and glutamate metabolism	34	16	47.06	0.284498	0.546907	15	44.12	0.310103	0.0859177	34352.1	70440
hsa00260	Glycine, serine and threonine metabolism	38	23	60.53	0.246935	0.573381	21	55.26	0.301438	0.0905216	60331.5	148945
hsa00270	Cysteine and methionine metabolism	48	20	41.67	0.319066	0.530629	15	31.25	0.316118	0.0993279	162648	445707
hsa00280	Valine, leucine and isoleucine degradation	47	23	48.94	-0.139454	0.56309	19	40.43	0.303641	0.114163	-27965.5	63787.7
hsa00290	Valine, leucine and isoleucine biosynthesis	4	2	50	0.550234	0.0248882	1	25	0.256367	NA	44778.6	NA
hsa00310	Lysine degradation	57	30	52.63	-0.102125	0.598825	23	40.35	0.30899	0.0961978	5545.28	116430
hsa00220	Arginine biosynthesis	20	8	40	0.0228197	0.6267	9	45	0.305157	0.10648	11028.2	62499.4
hsa00330	Arginine and proline metabolism	47	21	44.68	-0.094922	0.585444	20	42.55	0.291915	0.0944671	2422.53	122725
hsa00340	Histidine metabolism	21	11	52.38	-0.0582232	0.607212	9	42.86	0.286727	0.0875914	5868.67	170066
hsa00350	Tyrosine metabolism	32	12	37.5	0.310905	0.481113	11	34.38	0.28436	0.0806594	47340.7	126458
hsa00360	Phenylalanine metabolism	15	7	46.67	0.559463	0.108804	5	33.33	0.280726	0.0805278	100428	174652
hsa00380	Tryptophan metabolism	39	15	38.46	-0.115453	0.544627	9	23.08	0.278487	0.0916212	9814.97	164469
hsa00400	Phenylalanine, tyrosine and tryptophan biosynthesis	5	1	20	0.651593	NA	1	20	0.315747	NA	420.944	NA
hsa00410	beta-Alanine metabolism	31	17	54.84	0.186977	0.586239	17	54.84	0.295334	0.0874273	5638.09	78132.1
hsa00430	Taurine and hypotaurine metabolism	17	7	41.18	0.281349	0.59607	6	35.29	0.310984	0.107045	9498.92	33363.1
hsa00440	Phosphonate and phosphinate metabolism	5	3	60	0.579862	0.162318	3	60	0.305431	0.149999	31265.9	18731.8
hsa00450	Selenocompound metabolism	14	5	35.71	0.171976	0.618779	3	21.43	0.285758	0.0516746	97325.9	161265
hsa00470	D-Amino acid metabolism	5	3	60	-0.0942077	0.613539	2	40	0.321432	0.133315	6426.25	11625.5
hsa00480	Glutathione metabolism	53	26	49.06	-0.0125135	0.617149	25	47.17	0.317788	0.12325	348099	1.46362e+06
hsa00510	N-Glycan biosynthesis	51	21	41.18	0.246295	0.537884	15	29.41	0.296328	0.0837531	118864	202183
hsa00513	Various types of N-glycan biosynthesis	39	19	48.72	0.267217	0.498404	13	33.33	0.27062	0.0655328	79904.1	172521
hsa00512	Mucin type O-glycan biosynthesis	31	14	45.16	-0.0988812	0.611298	11	35.48	0.319705	0.109934	-824.496	58895.3
hsa00515	Mannose type O-glycan biosynthesis	18	8	44.44	-0.149218	0.498002	5	27.78	0.22566	0.0287358	12552	46052.9
hsa00514	Other types of O-glycan biosynthesis	42	14	33.33	-0.00210037	0.608876	12	28.57	0.287625	0.110015	48613.2	175703
hsa00532	Glycosaminoglycan biosynthesis - chondroitin sulfate / dermatan sulfate	21	14	66.67	0.0189034	0.641913	13	61.9	0.303414	0.136214	37344.7	123759
hsa00534	Glycosaminoglycan biosynthesis - heparan sulfate / heparin	22	7	31.82	0.0877702	0.665829	9	40.91	0.264311	0.107349	21638.1	44841.7
hsa00533	Glycosaminoglycan biosynthesis - keratan sulfate	14	5	35.71	0.155046	0.568316	3	21.43	0.320375	0.142001	-2967.34	48405.8
hsa00531	Glycosaminoglycan degradation	19	10	52.63	-0.0292593	0.656684	8	42.11	0.351801	0.144498	-38526.4	55857.3
hsa00563	Glycosylphosphatidylinositol (GPI)-anchor biosynthesis	27	15	55.56	0.0697706	0.543798	11	40.74	0.29941	0.137382	51606	96573.5
hsa00601	Glycosphingolipid biosynthesis - lacto and neolacto series	27	10	37.04	0.111479	0.553509	7	25.93	0.308334	0.100198	11276.5	41876.7
hsa00603	Glycosphingolipid biosynthesis - globo and isoglobo series	16	8	50	-0.147715	0.507434	6	37.5	0.268033	0.0808915	-23875.4	51053.6
hsa00604	Glycosphingolipid biosynthesis - ganglio series	14	8	57.14	-0.0430219	0.594424	5	35.71	0.310329	0.080892	331.317	87154.7
hsa00511	Other glycan degradation	14	4	28.57	0.0364224	0.569776	2	14.29	0.242642	0.0485807	-34982.4	104603
hsa00730	Thiamine metabolism	13	6	46.15	-0.132546	0.679124	5	38.46	0.360964	0.0891091	52143.1	88102.1
hsa00740	Riboflavin metabolism	8	3	37.5	-0.246826	0.627196	3	37.5	0.310043	0.127713	-80242.7	136406
hsa00750	Vitamin B6 metabolism	6	4	66.67	0.439631	0.601176	3	50	0.403755	0.123878	100023	126000
hsa00760	Nicotinate and nicotinamide metabolism	35	15	42.86	0.117443	0.592268	16	45.71	0.294264	0.111756	63828.2	331549
hsa00770	Pantothenate and CoA biosynthesis	21	12	57.14	0.112813	0.588898	11	52.38	0.285634	0.0973269	-5247.78	116687
hsa00780	Biotin metabolism	3	0	0	NaN	NA	0	0	NaN	NA	NaN	NA
hsa00785	Lipoic acid metabolism	18	13	72.22	-0.144387	0.537131	10	55.56	0.29739	0.081952	-18681.2	44981.6
hsa00790	Folate biosynthesis	23	6	26.09	-0.236319	0.564663	5	21.74	0.316212	0.0729146	-26187.4	23790.7
hsa00670	One carbon pool by folate	35	17	48.57	0.115708	0.571313	14	40	0.280754	0.0769533	51251.5	154854
hsa00830	Retinol metabolism	53	24	45.28	0.122871	0.598006	21	39.62	0.318532	0.11316	-6327.05	142050
hsa00860	Porphyrin metabolism	36	19	52.78	0.112949	0.587724	18	50	0.275685	0.101928	341244	1.01533e+06
hsa00130	Ubiquinone and other terpenoid-quinone biosynthesis	11	7	63.64	0.283391	0.617998	5	45.45	0.337391	0.117771	11019	31186.1
hsa00900	Terpenoid backbone biosynthesis	21	18	85.71	-0.0457442	0.594525	16	76.19	0.312148	0.103361	15780.7	88428.5
hsa00232	Caffeine metabolism	6	2	33.33	0.592942	0.240631	1	16.67	0.439778	NA	15959.5	NA
hsa00524	Neomycin, kanamycin and gentamicin biosynthesis	5	2	40	0.658054	0.23754	1	20	0.431056	NA	169896	NA
hsa00980	Metabolism of xenobiotics by cytochrome P450	59	23	38.98	0.0115298	0.622193	20	33.9	0.346469	0.124198	12440.3	139678
hsa00982	Drug metabolism - cytochrome P450	56	20	35.71	0.122739	0.654899	20	35.71	0.378114	0.119581	34064.1	164502
hsa00983	Drug metabolism - other enzymes	67	30	44.78	0.120765	0.611769	27	40.3	0.337042	0.114837	82420.1	221155

## Sheet: Lpr
		total genes	significant spearman	% spearman	average spearman rho	Standard Deviation spearman rho	significant pearson	% pearson	average pearson r2	Standard Deviation pearson r2	average pearson slope	Standard Deviation pearson slope
hsa00010	Glycolysis / Gluconeogenesis	62	34	54.84	0.213296	0.628752	34	54.84	0.359569	0.128553	32161.5	62473.3
hsa00020	Citrate cycle (TCA cycle)	29	17	58.62	-0.249143	0.515204	15	51.72	0.324884	0.126887	-114.225	7649.54
hsa00030	Pentose phosphate pathway	29	14	48.28	0.3462	0.553622	15	51.72	0.328942	0.137186	20042.2	54267.9
hsa00040	Pentose and glucuronate interconversions	26	9	34.62	0.475452	0.420457	12	46.15	0.278765	0.106269	1211.94	6031.02
hsa00051	Fructose and mannose metabolism	30	18	60	0.632917	0.169273	17	56.67	0.352814	0.161823	26758.1	58978
hsa00052	Galactose metabolism	28	10	35.71	0.617502	0.16456	12	42.86	0.331627	0.168896	7541.31	8467.19
hsa00053	Ascorbate and aldarate metabolism	22	9	40.91	-0.0718681	0.69127	11	50	0.323645	0.128901	-1251.3	7919.4
hsa00500	Starch and sucrose metabolism	29	14	48.28	0.337963	0.524392	16	55.17	0.345527	0.129991	1788.21	7653.22
hsa00520	Amino sugar and nucleotide sugar metabolism	46	23	50	0.347219	0.59153	22	47.83	0.368647	0.1677	5564.07	14472.1
hsa00620	Pyruvate metabolism	44	26	59.09	-0.0871979	0.650989	27	61.36	0.347138	0.130802	7990.23	29764.7
hsa00630	Glyoxylate and dicarboxylate metabolism	28	18	64.29	0.0881484	0.639909	17	60.71	0.35228	0.119695	1332.54	10199.8
hsa00640	Propanoate metabolism	31	16	51.61	-0.00387693	0.656542	17	54.84	0.35287	0.148934	6378.4	28713.5
hsa00650	Butanoate metabolism	26	16	61.54	0.309727	0.556609	16	61.54	0.349918	0.113755	9630.24	22882.7
hsa00562	Inositol phosphate metabolism	72	37	51.39	0.149069	0.606145	36	50	0.336782	0.158912	4894.02	24343
hsa00190	Oxidative phosphorylation	97	48	49.48	-0.0754888	0.600616	49	50.52	0.316519	0.14779	3470.19	25171.4
hsa00910	Nitrogen metabolism	17	7	41.18	-0.194213	0.597282	7	41.18	0.334901	0.150713	13615.6	48863.1
hsa00920	Sulfur metabolism	8	4	50	0.351021	0.575262	3	37.5	0.392539	0.171339	5270.53	5758.16
hsa00061	Fatty acid biosynthesis	16	8	50	0.444489	0.379326	8	50	0.307067	0.169067	3971.8	8268.91
hsa00062	Fatty acid elongation	22	10	45.45	-0.131179	0.554165	9	40.91	0.302299	0.0860229	-128.552	3431.19
hsa00071	Fatty acid degradation	41	20	48.78	0.0672611	0.588278	17	41.46	0.302468	0.114896	-606.733	7735.36
hsa00100	Steroid biosynthesis	20	11	55	0.346005	0.536253	9	45	0.35252	0.155613	8441.04	13301
hsa00120	Primary bile acid biosynthesis	17	9	52.94	0.507075	0.490167	9	52.94	0.414967	0.166159	5402.61	12919
hsa00140	Steroid hormone biosynthesis	47	19	40.43	0.412972	0.450819	17	36.17	0.341459	0.128242	543.841	1209.34
hsa00561	Glycerolipid metabolism	50	26	52	0.0835081	0.609797	27	54	0.342158	0.134199	3000.86	9258.82
hsa00564	Glycerophospholipid metabolism	87	53	60.92	0.298575	0.551012	45	51.72	0.380479	0.152748	4352.8	9792.88
hsa00565	Ether lipid metabolism	39	25	64.1	0.25451	0.568929	22	56.41	0.344299	0.12954	3784.5	13456.4
hsa00600	Sphingolipid metabolism	48	24	50	0.102489	0.605924	18	37.5	0.384108	0.181623	2820.05	6813.06
hsa00590	Arachidonic acid metabolism	54	33	61.11	0.329848	0.541795	25	46.3	0.377987	0.1548	3895.38	8631.76
hsa00591	Linoleic acid metabolism	25	18	72	0.489906	0.41398	15	60	0.384909	0.177324	1014.58	1203.27
hsa00592	alpha-Linolenic acid metabolism	21	17	80.95	0.454932	0.412181	12	57.14	0.329681	0.126933	897.75	1141.29
hsa01040	Biosynthesis of unsaturated fatty acids	23	12	52.17	0.212166	0.574486	10	43.48	0.309546	0.123215	4114.27	7131.57
hsa00230	Purine metabolism	113	53	46.9	-0.0306458	0.626907	52	46.02	0.360719	0.134063	1127.24	6617.65
hsa00240	Pyrimidine metabolism	54	31	57.41	-0.0401078	0.638817	27	50	0.383976	0.139978	1931.32	9406.94
hsa00250	Alanine, aspartate and glutamate metabolism	34	16	47.06	0.248844	0.615117	19	55.88	0.33751	0.124724	1384.85	5490.65
hsa00260	Glycine, serine and threonine metabolism	38	24	63.16	0.268313	0.613854	24	63.16	0.344073	0.125339	4031.54	10132.1
hsa00270	Cysteine and methionine metabolism	48	22	45.83	0.312906	0.562878	20	41.67	0.338869	0.142163	8973.06	25835.4
hsa00280	Valine, leucine and isoleucine degradation	47	24	51.06	-0.160922	0.607402	24	51.06	0.337733	0.149523	-1623.57	4366.28
hsa00290	Valine, leucine and isoleucine biosynthesis	4	2	50	0.640398	0.0193901	2	50	0.238613	0.110594	4109.22	1195.15
hsa00310	Lysine degradation	57	31	54.39	-0.130916	0.629227	29	50.88	0.333475	0.133588	1447.3	10665.3
hsa00220	Arginine biosynthesis	20	8	40	0.038568	0.670746	10	50	0.351907	0.135419	72.6968	4921.23
hsa00330	Arginine and proline metabolism	47	22	46.81	-0.0688248	0.645293	21	44.68	0.349066	0.130026	2206.54	12739.1
hsa00340	Histidine metabolism	21	11	52.38	-0.0728004	0.66625	11	52.38	0.322089	0.114347	170.514	10991.9
hsa00350	Tyrosine metabolism	32	14	43.75	0.35232	0.478817	16	50	0.301085	0.115186	3584.78	7430.98
hsa00360	Phenylalanine metabolism	15	7	46.67	0.614585	0.119482	7	46.67	0.324639	0.095197	6929.44	10048.8
hsa00380	Tryptophan metabolism	39	17	43.59	-0.049152	0.590478	13	33.33	0.296177	0.132608	999.261	9857.14
hsa00400	Phenylalanine, tyrosine and tryptophan biosynthesis	5	1	20	0.699589	NA	1	20	0.437466	NA	32.4901	NA
hsa00410	beta-Alanine metabolism	31	16	51.61	0.175301	0.657804	16	51.61	0.374081	0.0994091	473.333	5873.41
hsa00430	Taurine and hypotaurine metabolism	17	8	47.06	0.221923	0.623467	6	35.29	0.395059	0.161617	883.74	2447.75
hsa00440	Phosphonate and phosphinate metabolism	5	3	60	0.644374	0.166503	3	60	0.388033	0.173919	2285	1293.06
hsa00450	Selenocompound metabolism	14	7	50	0.245331	0.530226	6	42.86	0.255559	0.102778	3534.25	8407.6
hsa00470	D-Amino acid metabolism	5	3	60	-0.120362	0.712389	3	60	0.370327	0.154111	244.286	738.365
hsa00480	Glutathione metabolism	53	28	52.83	-0.0433794	0.646237	27	50.94	0.383756	0.156004	23903.1	104835
hsa00510	N-Glycan biosynthesis	51	21	41.18	0.268761	0.565883	19	37.25	0.320399	0.130676	7587.68	13237.4
hsa00513	Various types of N-glycan biosynthesis	39	19	48.72	0.285649	0.519945	17	43.59	0.297624	0.098528	5262.68	11273.4
hsa00512	Mucin type O-glycan biosynthesis	31	14	45.16	-0.119518	0.655555	15	48.39	0.323207	0.152779	713.433	4316.41
hsa00515	Mannose type O-glycan biosynthesis	18	9	50	-0.200401	0.510189	7	38.89	0.259926	0.054233	855.75	2584.43
hsa00514	Other types of O-glycan biosynthesis	42	14	33.33	-0.0185519	0.639997	17	40.48	0.300127	0.146127	2987.51	10611.3
hsa00532	Glycosaminoglycan biosynthesis - chondroitin sulfate / dermatan sulfate	21	15	71.43	-0.00677741	0.664285	15	71.43	0.34015	0.177049	2735.52	8350.07
hsa00534	Glycosaminoglycan biosynthesis - heparan sulfate / heparin	22	9	40.91	0.0810267	0.64121	8	36.36	0.328488	0.128111	1784.36	3322.8
hsa00533	Glycosaminoglycan biosynthesis - keratan sulfate	14	4	28.57	0.346952	0.544533	6	42.86	0.289742	0.167362	867.157	3144.92
hsa00531	Glycosaminoglycan degradation	19	10	52.63	-0.0377818	0.686104	9	47.37	0.394854	0.173142	-2547.19	4031.22
hsa00563	Glycosylphosphatidylinositol (GPI)-anchor biosynthesis	27	13	48.15	0.0714097	0.618794	12	44.44	0.354226	0.178229	3471.74	6896.13
hsa00601	Glycosphingolipid biosynthesis - lacto and neolacto series	27	13	48.15	0.0575693	0.573283	10	37.04	0.34113	0.143732	611.84	2716.62
hsa00603	Glycosphingolipid biosynthesis - globo and isoglobo series	16	9	56.25	-0.185092	0.537231	7	43.75	0.326476	0.111596	-939.412	4497.11
hsa00604	Glycosphingolipid biosynthesis - ganglio series	14	8	57.14	-0.0304036	0.637316	6	42.86	0.350365	0.117633	815.452	6340.89
hsa00511	Other glycan degradation	14	5	35.71	-0.0705386	0.545409	3	21.43	0.255348	0.082887	-2883.25	5645.34
hsa00730	Thiamine metabolism	13	8	61.54	-0.0171003	0.646846	8	61.54	0.339862	0.175914	2359.82	5154.68
hsa00740	Riboflavin metabolism	8	4	50	-0.300302	0.561113	3	37.5	0.410799	0.156661	-6236.8	10651.8
hsa00750	Vitamin B6 metabolism	6	4	66.67	0.457642	0.655141	4	66.67	0.415291	0.180083	5397.52	8390.71
hsa00760	Nicotinate and nicotinamide metabolism	35	16	45.71	0.0973835	0.625539	16	45.71	0.363456	0.147014	4269.98	23115.8
hsa00770	Pantothenate and CoA biosynthesis	21	13	61.9	0.071324	0.619866	13	61.9	0.323381	0.135964	-401.05	7961.78
hsa00780	Biotin metabolism	3	0	0	NaN	NA	0	0	NaN	NA	NaN	NA
hsa00785	Lipoic acid metabolism	18	13	72.22	-0.160586	0.588858	12	66.67	0.361447	0.126796	-1580.95	3248.51
hsa00790	Folate biosynthesis	23	7	30.43	-0.159391	0.612551	8	34.78	0.296711	0.147597	-523.586	2481.04
hsa00670	One carbon pool by folate	35	18	51.43	0.0853121	0.619798	18	51.43	0.318243	0.10956	2946.77	10071.6
hsa00830	Retinol metabolism	53	27	50.94	0.168761	0.619043	24	45.28	0.372733	0.147578	-386.283	9666.26
hsa00860	Porphyrin metabolism	36	20	55.56	0.15921	0.617546	20	55.56	0.326492	0.122717	23782.2	67529.3
hsa00130	Ubiquinone and other terpenoid-quinone biosynthesis	11	8	72.73	0.318945	0.620584	7	63.64	0.371179	0.156937	1397.3	2517.3
hsa00900	Terpenoid backbone biosynthesis	21	18	85.71	-0.0411522	0.655024	17	80.95	0.38678	0.137186	1203.01	6511.8
hsa00232	Caffeine metabolism	6	3	50	0.275421	0.593576	1	16.67	0.494921	NA	1110.18	NA
hsa00524	Neomycin, kanamycin and gentamicin biosynthesis	5	2	40	0.675623	0.257747	1	20	0.511965	NA	12141.2	NA
hsa00980	Metabolism of xenobiotics by cytochrome P450	59	26	44.07	0.024108	0.642499	25	42.37	0.380288	0.165674	632.041	8884.83
hsa00982	Drug metabolism - cytochrome P450	56	24	42.86	0.153597	0.664669	25	44.64	0.418571	0.176139	2017.85	10409.2
hsa00983	Drug metabolism - other enzymes	67	34	50.75	0.122573	0.637609	30	44.78	0.400154	0.148763	5429.66	15164.3

## Sheet: SNR lac
		total genes	significant spearman	% spearman	average spearman rho	Standard Deviation spearman rho	significant pearson	% pearson	average pearson r2	Standard Deviation pearson r2	average pearson slope	Standard Deviation pearson slope
hsa00010	Glycolysis / Gluconeogenesis	62	16	25.81	0.329344	0.48204	20	32.26	0.27534	0.0992575	755.572	1726.14
hsa00020	Citrate cycle (TCA cycle)	29	12	41.38	0.466051	0.307613	8	27.59	0.308225	0.106874	143.8	344.542
hsa00030	Pentose phosphate pathway	29	9	31.03	0.429048	0.389197	9	31.03	0.256673	0.054814	406.113	300.213
hsa00040	Pentose and glucuronate interconversions	26	6	23.08	0.433735	0.494987	5	19.23	0.351883	0.110404	384.031	585.669
hsa00051	Fructose and mannose metabolism	30	4	13.33	0.297415	0.535852	3	10	0.274727	0.0363404	429.523	905.36
hsa00052	Galactose metabolism	28	8	28.57	0.277396	0.554984	7	25	0.376292	0.152471	348.748	488.16
hsa00053	Ascorbate and aldarate metabolism	22	3	13.64	0.243667	0.708656	3	13.64	0.286817	0.0849963	291.108	175.075
hsa00500	Starch and sucrose metabolism	29	8	27.59	-0.145883	0.625949	9	31.03	0.369268	0.159519	52.5452	355.414
hsa00520	Amino sugar and nucleotide sugar metabolism	46	8	17.39	0.584551	0.101829	8	17.39	0.31128	0.0911279	202.878	209.066
hsa00620	Pyruvate metabolism	44	11	25	0.256964	0.510525	10	22.73	0.271569	0.0727709	734.398	1469.35
hsa00630	Glyoxylate and dicarboxylate metabolism	28	6	21.43	0.547694	0.0512676	4	14.29	0.274029	0.0717893	173.538	209.22
hsa00640	Propanoate metabolism	31	10	32.26	0.238645	0.565877	10	32.26	0.304378	0.0794251	161.296	404.609
hsa00650	Butanoate metabolism	26	3	11.54	0.58894	0.137912	3	11.54	0.292345	0.0745706	121.579	130.028
hsa00562	Inositol phosphate metabolism	72	15	20.83	0.161395	0.548424	14	19.44	0.322938	0.0939769	25.1673	95.2729
hsa00190	Oxidative phosphorylation	97	31	31.96	0.38256	0.417082	26	26.8	0.305246	0.0872894	120.2	226.847
hsa00910	Nitrogen metabolism	17	3	17.65	0.129409	0.637225	4	23.53	0.278389	0.0841014	-196.02	216.01
hsa00920	Sulfur metabolism	8	2	25	0.0628483	0.725861	3	37.5	0.265063	0.125606	165.442	130.113
hsa00061	Fatty acid biosynthesis	16	5	31.25	0.593181	0.0989733	5	31.25	0.35715	0.0854087	137.682	109.906
hsa00062	Fatty acid elongation	22	6	27.27	0.373598	0.44843	6	27.27	0.329125	0.0929195	185.157	145.198
hsa00071	Fatty acid degradation	41	11	26.83	0.416497	0.438259	11	26.83	0.306961	0.0796443	128.12	188.712
hsa00100	Steroid biosynthesis	20	6	30	0.124025	0.599131	6	30	0.282664	0.0815735	165.491	329.805
hsa00120	Primary bile acid biosynthesis	17	5	29.41	0.109026	0.548889	5	29.41	0.261503	0.0628418	8.00069	140.917
hsa00140	Steroid hormone biosynthesis	47	7	14.89	-0.156733	0.528989	5	10.64	0.247294	0.0435527	53.5348	82.5241
hsa00561	Glycerolipid metabolism	50	17	34	0.0774577	0.578835	18	36	0.321947	0.093278	148.811	363.495
hsa00564	Glycerophospholipid metabolism	87	21	24.14	0.16282	0.532946	18	20.69	0.321822	0.0842448	36.7058	120.688
hsa00565	Ether lipid metabolism	39	5	12.82	0.374728	0.492511	5	12.82	0.415003	0.15183	36.2818	76.7217
hsa00600	Sphingolipid metabolism	48	13	27.08	0.205637	0.570317	14	29.17	0.311199	0.10971	25.2264	131.056
hsa00590	Arachidonic acid metabolism	54	6	11.11	0.372484	0.455578	7	12.96	0.327337	0.0731907	399.119	702.671
hsa00591	Linoleic acid metabolism	25	1	4	-0.480268	NA	1	4	0.200181	NA	-0.880378	NA
hsa00592	alpha-Linolenic acid metabolism	21	1	4.76	-0.494095	NA	0	0	NaN	NA	NaN	NA
hsa01040	Biosynthesis of unsaturated fatty acids	23	7	30.43	0.226814	0.508655	5	21.74	0.282315	0.118089	145.935	150.283
hsa00230	Purine metabolism	113	47	41.59	-0.0411437	0.548311	43	38.05	0.352826	0.134201	-7.20688	174.157
hsa00240	Pyrimidine metabolism	54	18	33.33	0.416503	0.398494	17	31.48	0.324417	0.116825	10.3705	197.488
hsa00250	Alanine, aspartate and glutamate metabolism	34	7	20.59	-0.145668	0.568196	9	26.47	0.275144	0.0818033	39.4016	436.137
hsa00260	Glycine, serine and threonine metabolism	38	8	21.05	0.374276	0.409123	6	15.79	0.293092	0.053893	45.5293	124.764
hsa00270	Cysteine and methionine metabolism	48	17	35.42	0.356691	0.462519	17	35.42	0.307571	0.0967169	245.565	309.018
hsa00280	Valine, leucine and isoleucine degradation	47	6	12.77	0.605528	0.08322	7	14.89	0.322507	0.0822346	166.35	168.051
hsa00290	Valine, leucine and isoleucine biosynthesis	4	1	25	0.45019	NA	0	0	NaN	NA	NaN	NA
hsa00310	Lysine degradation	57	10	17.54	0.214888	0.530738	12	21.05	0.280831	0.0820051	194.181	314.05
hsa00220	Arginine biosynthesis	20	3	15	-0.222346	0.621604	6	30	0.294591	0.043695	134.787	513.865
hsa00330	Arginine and proline metabolism	47	11	23.4	0.379936	0.42321	11	23.4	0.302727	0.0733326	24.3507	413.482
hsa00340	Histidine metabolism	21	5	23.81	0.106307	0.575124	8	38.1	0.265329	0.0632445	-19.4492	472.805
hsa00350	Tyrosine metabolism	32	7	21.88	0.0863277	0.620896	10	31.25	0.352539	0.157697	64.1868	126.704
hsa00360	Phenylalanine metabolism	15	3	20	0.112473	0.639289	4	26.67	0.27212	0.0632655	38.5097	144.047
hsa00380	Tryptophan metabolism	39	7	17.95	-0.0979657	0.631268	9	23.08	0.294102	0.0876972	-19.6709	445.961
hsa00400	Phenylalanine, tyrosine and tryptophan biosynthesis	5	1	20	0.46958	NA	0	0	NaN	NA	NaN	NA
hsa00410	beta-Alanine metabolism	31	8	25.81	0.397808	0.424014	10	32.26	0.276847	0.0661563	122.209	174.754
hsa00430	Taurine and hypotaurine metabolism	17	5	29.41	-0.143138	0.594229	5	29.41	0.297609	0.0949385	-55.9941	81.1586
hsa00440	Phosphonate and phosphinate metabolism	5	2	40	0.574772	0.0876202	1	20	0.386951	NA	168.665	NA
hsa00450	Selenocompound metabolism	14	4	28.57	0.220136	0.537168	3	21.43	0.240312	0.0196945	132.948	211.782
hsa00470	D-Amino acid metabolism	5	1	20	-0.681748	NA	3	60	0.25418	0.0791362	367.376	666.909
hsa00480	Glutathione metabolism	53	20	37.74	0.295475	0.488617	19	35.85	0.317108	0.0824624	506.867	775.891
hsa00510	N-Glycan biosynthesis	51	16	31.37	0.435453	0.401775	15	29.41	0.354713	0.105186	129.921	289.365
hsa00513	Various types of N-glycan biosynthesis	39	10	25.64	0.467774	0.334093	9	23.08	0.320146	0.0914584	204.963	355.953
hsa00512	Mucin type O-glycan biosynthesis	31	8	25.81	-0.163415	0.578064	7	22.58	0.336664	0.107329	-18.9074	168.131
hsa00515	Mannose type O-glycan biosynthesis	18	5	27.78	0.132204	0.650511	3	16.67	0.562754	0.0473661	218.124	253.426
hsa00514	Other types of O-glycan biosynthesis	42	12	28.57	-0.115128	0.572279	10	23.81	0.343627	0.113994	92.5609	368.593
hsa00532	Glycosaminoglycan biosynthesis - chondroitin sulfate / dermatan sulfate	21	6	28.57	-0.0168636	0.594701	5	23.81	0.379828	0.0908359	-29.6748	137.548
hsa00534	Glycosaminoglycan biosynthesis - heparan sulfate / heparin	22	6	27.27	0.19746	0.576195	7	31.82	0.325667	0.0778268	43.3125	59.3209
hsa00533	Glycosaminoglycan biosynthesis - keratan sulfate	14	6	42.86	-0.0372494	0.632075	6	42.86	0.396761	0.1597	-14.9685	134.21
hsa00531	Glycosaminoglycan degradation	19	7	36.84	0.116591	0.551726	3	15.79	0.317839	0.0681188	2.49313	192.048
hsa00563	Glycosylphosphatidylinositol (GPI)-anchor biosynthesis	27	8	29.63	0.335748	0.492071	8	29.63	0.353622	0.156601	24.3334	66.8509
hsa00601	Glycosphingolipid biosynthesis - lacto and neolacto series	27	9	33.33	0.177847	0.553283	11	40.74	0.295335	0.109224	35.1688	111.302
hsa00603	Glycosphingolipid biosynthesis - globo and isoglobo series	16	5	31.25	0.367433	0.492389	8	50	0.283184	0.092623	21.9778	96.0444
hsa00604	Glycosphingolipid biosynthesis - ganglio series	14	3	21.43	0.216478	0.593964	3	21.43	0.317437	0.126605	24.914	99.7252
hsa00511	Other glycan degradation	14	8	57.14	0.133441	0.557339	6	42.86	0.271559	0.0654205	84.2506	148.559
hsa00730	Thiamine metabolism	13	4	30.77	-0.284935	0.487995	4	30.77	0.372835	0.200537	50.5002	165.893
hsa00740	Riboflavin metabolism	8	2	25	0.550034	0.13931	3	37.5	0.298114	0.0512567	-47.8668	550.648
hsa00750	Vitamin B6 metabolism	6	1	16.67	0.715624	NA	1	16.67	0.569157	NA	54.775	NA
hsa00760	Nicotinate and nicotinamide metabolism	35	9	25.71	0.319894	0.493249	13	37.14	0.302743	0.0789821	24.4012	254.336
hsa00770	Pantothenate and CoA biosynthesis	21	5	23.81	0.549589	0.0655716	6	28.57	0.310328	0.0881112	28.3192	377.702
hsa00780	Biotin metabolism	3	0	0	NaN	NA	0	0	NaN	NA	NaN	NA
hsa00785	Lipoic acid metabolism	18	6	33.33	0.205929	0.537485	5	27.78	0.338249	0.113891	26.0409	49.0855
hsa00790	Folate biosynthesis	23	9	39.13	0.421688	0.437015	8	34.78	0.329328	0.0572668	220.048	505.494
hsa00670	One carbon pool by folate	35	11	31.43	0.486193	0.325895	10	28.57	0.312382	0.122382	135.239	130.101
hsa00830	Retinol metabolism	53	12	22.64	0.0486389	0.565859	9	16.98	0.273835	0.057288	66.2062	151.518
hsa00860	Porphyrin metabolism	36	9	25	0.444346	0.447116	9	25	0.343472	0.130563	121.906	168.869
hsa00130	Ubiquinone and other terpenoid-quinone biosynthesis	11	1	9.09	0.566304	NA	1	9.09	0.278308	NA	140.285	NA
hsa00900	Terpenoid backbone biosynthesis	21	2	9.52	0.507913	0.0447557	2	9.52	0.239521	0.02246	107.039	61.7554
hsa00232	Caffeine metabolism	6	2	33.33	0.00646313	0.719242	1	16.67	0.302571	NA	11.9564	NA
hsa00524	Neomycin, kanamycin and gentamicin biosynthesis	5	1	20	0.538445	NA	0	0	NaN	NA	NaN	NA
hsa00980	Metabolism of xenobiotics by cytochrome P450	59	16	27.12	0.170297	0.543975	15	25.42	0.298523	0.082725	140.463	235.668
hsa00982	Drug metabolism - cytochrome P450	56	15	26.79	-0.010684	0.575195	14	25	0.307051	0.0886352	119.443	250.016
hsa00983	Drug metabolism - other enzymes	67	20	29.85	0.230565	0.520618	15	22.39	0.310575	0.0855968	96.6059	155.397

## Sheet: SNR pyr
		total genes	significant spearman	% spearman	average spearman rho	Standard Deviation spearman rho	significant pearson	% pearson	average pearson r2	Standard Deviation pearson r2	average pearson slope	Standard Deviation pearson slope
hsa00010	Glycolysis / Gluconeogenesis	62	40	64.52	-0.0188732	0.590538	8	12.9	0.457035	0.172134	74.5278	60.2322
hsa00020	Citrate cycle (TCA cycle)	29	19	65.52	0.420467	0.467859	5	17.24	0.548737	0.169044	52.0748	75.5233
hsa00030	Pentose phosphate pathway	29	19	65.52	-0.0021268	0.534146	4	13.79	0.339894	0.0742843	39.4226	51.9543
hsa00040	Pentose and glucuronate interconversions	26	12	46.15	-0.172872	0.517358	1	3.85	0.398692	NA	62.7024	NA
hsa00051	Fructose and mannose metabolism	30	16	53.33	-0.495886	0.262865	1	3.33	0.289964	NA	35.8036	NA
hsa00052	Galactose metabolism	28	10	35.71	-0.46731	0.314636	1	3.57	0.285988	NA	26.7961	NA
hsa00053	Ascorbate and aldarate metabolism	22	16	72.73	0.118173	0.598482	4	18.18	0.470475	0.190092	66.5407	41.5298
hsa00500	Starch and sucrose metabolism	29	12	41.38	-0.309082	0.517427	3	10.34	0.429674	0.134883	62.5426	45.6627
hsa00520	Amino sugar and nucleotide sugar metabolism	46	24	52.17	-0.0975505	0.529105	1	2.17	0.449467	NA	113.982	NA
hsa00620	Pyruvate metabolism	44	34	77.27	0.149603	0.598991	10	22.73	0.491624	0.178692	55.5272	56.4951
hsa00630	Glyoxylate and dicarboxylate metabolism	28	20	71.43	0.12826	0.566246	4	14.29	0.552736	0.180712	42.7859	22.2776
hsa00640	Propanoate metabolism	31	22	70.97	0.0579939	0.595385	5	16.13	0.476336	0.172431	19.4967	5.8757
hsa00650	Butanoate metabolism	26	19	73.08	-0.154025	0.547241	4	15.38	0.499384	0.186531	18.4542	22.9625
hsa00562	Inositol phosphate metabolism	72	33	45.83	0.0758134	0.560204	6	8.33	0.400828	0.120649	22.5789	25.4381
hsa00190	Oxidative phosphorylation	97	65	67.01	0.263358	0.495519	7	7.22	0.343925	0.0546788	10.3638	12.3159
hsa00910	Nitrogen metabolism	17	7	41.18	0.237997	0.504895	2	11.76	0.493579	0.199009	3.52468	3.47208
hsa00920	Sulfur metabolism	8	5	62.5	-0.113394	0.579489	0	0	NaN	NA	NaN	NA
hsa00061	Fatty acid biosynthesis	16	8	50	-0.291342	0.454189	1	6.25	0.315323	NA	4.89188	NA
hsa00062	Fatty acid elongation	22	10	45.45	0.0326499	0.574003	3	13.64	0.510359	0.24289	20.5213	29.8354
hsa00071	Fatty acid degradation	41	23	56.1	0.0928744	0.573264	9	21.95	0.550587	0.172044	42.5919	35.1216
hsa00100	Steroid biosynthesis	20	13	65	-0.0649398	0.624604	2	10	0.3871	0.00926358	8.80019	11.3045
hsa00120	Primary bile acid biosynthesis	17	9	52.94	-0.346694	0.516216	1	5.88	0.288703	NA	0.639243	NA
hsa00140	Steroid hormone biosynthesis	47	28	59.57	-0.28778	0.473109	3	6.38	0.522954	0.27425	27.9283	31.757
hsa00561	Glycerolipid metabolism	50	30	60	0.0517685	0.558645	4	8	0.506891	0.185657	53.7762	50.071
hsa00564	Glycerophospholipid metabolism	87	50	57.47	-0.150371	0.545219	3	3.45	0.428556	0.127008	7.25841	4.41425
hsa00565	Ether lipid metabolism	39	21	53.85	-0.118185	0.553781	0	0	NaN	NA	NaN	NA
hsa00600	Sphingolipid metabolism	48	25	52.08	-0.0313622	0.549566	2	4.17	0.410517	0.0538498	9.77058	3.47367
hsa00590	Arachidonic acid metabolism	54	28	51.85	-0.209304	0.583625	3	5.56	0.614947	0.14579	48.3428	38.4947
hsa00591	Linoleic acid metabolism	25	13	52	-0.494506	0.41094	0	0	NaN	NA	NaN	NA
hsa00592	alpha-Linolenic acid metabolism	21	13	61.9	-0.429656	0.378575	0	0	NaN	NA	NaN	NA
hsa01040	Biosynthesis of unsaturated fatty acids	23	12	52.17	-0.14386	0.533406	1	4.35	0.783129	NA	8.96168	NA
hsa00230	Purine metabolism	113	59	52.21	0.036336	0.548696	8	7.08	0.520021	0.219372	10.3677	9.69949
hsa00240	Pyrimidine metabolism	54	36	66.67	0.112421	0.571986	5	9.26	0.518261	0.21518	4.87813	9.54495
hsa00250	Alanine, aspartate and glutamate metabolism	34	20	58.82	-0.199722	0.539361	1	2.94	0.352859	NA	1.06955	NA
hsa00260	Glycine, serine and threonine metabolism	38	26	68.42	-0.0864582	0.622363	5	13.16	0.500036	0.182508	57.3842	21.5057
hsa00270	Cysteine and methionine metabolism	48	32	66.67	0.0150839	0.550815	1	2.08	0.295016	NA	30.6803	NA
hsa00280	Valine, leucine and isoleucine degradation	47	35	74.47	0.208023	0.520721	14	29.79	0.442266	0.164115	29.7948	32.7192
hsa00290	Valine, leucine and isoleucine biosynthesis	4	3	75	-0.262759	0.673915	0	0	NaN	NA	NaN	NA
hsa00310	Lysine degradation	57	39	68.42	0.21222	0.535681	7	12.28	0.494026	0.219254	40.2364	41.545
hsa00220	Arginine biosynthesis	20	11	55	-0.105673	0.584662	1	5	0.352859	NA	1.06955	NA
hsa00330	Arginine and proline metabolism	47	32	68.09	0.139401	0.601447	8	17.02	0.408296	0.177827	59.3846	40.6609
hsa00340	Histidine metabolism	21	12	57.14	0.297935	0.601802	6	28.57	0.396966	0.178568	46.2586	48.4129
hsa00350	Tyrosine metabolism	32	18	56.25	-0.0980975	0.545074	4	12.5	0.385498	0.0924281	27.8954	34.9844
hsa00360	Phenylalanine metabolism	15	9	60	-0.119209	0.602416	1	6.67	0.296266	NA	74.841	NA
hsa00380	Tryptophan metabolism	39	26	66.67	0.0310869	0.570226	6	15.38	0.531819	0.213917	57.3272	38.6074
hsa00400	Phenylalanine, tyrosine and tryptophan biosynthesis	5	4	80	0.260252	0.517657	0	0	NaN	NA	NaN	NA
hsa00410	beta-Alanine metabolism	31	23	74.19	0.0372639	0.611041	7	22.58	0.506392	0.178456	38.7256	40.9671
hsa00430	Taurine and hypotaurine metabolism	17	13	76.47	-0.161249	0.545325	2	11.76	0.389724	0.0834152	51.3568	46.3884
hsa00440	Phosphonate and phosphinate metabolism	5	4	80	0.0288612	0.64086	0	0	NaN	NA	NaN	NA
hsa00450	Selenocompound metabolism	14	7	50	-0.0206629	0.520354	0	0	NaN	NA	NaN	NA
hsa00470	D-Amino acid metabolism	5	4	80	-0.014674	0.783233	0	0	NaN	NA	NaN	NA
hsa00480	Glutathione metabolism	53	32	60.38	0.231343	0.530645	5	9.43	0.403303	0.0739369	56.1818	34.3041
hsa00510	N-Glycan biosynthesis	51	25	49.02	-0.131375	0.538683	2	3.92	0.360936	0.0496408	1.91737	2.15301
hsa00513	Various types of N-glycan biosynthesis	39	21	53.85	-0.0928949	0.538445	2	5.13	0.360936	0.0496408	1.91737	2.15301
hsa00512	Mucin type O-glycan biosynthesis	31	15	48.39	0.17613	0.562819	4	12.9	0.444556	0.1026	2.64009	1.24446
hsa00515	Mannose type O-glycan biosynthesis	18	10	55.56	0.0951059	0.537975	2	11.11	0.342478	0.0416685	5.69608	1.1616
hsa00514	Other types of O-glycan biosynthesis	42	18	42.86	0.0949039	0.52624	2	4.76	0.466172	0.133262	4.00499	3.55316
hsa00532	Glycosaminoglycan biosynthesis - chondroitin sulfate / dermatan sulfate	21	11	52.38	0.0433779	0.568715	1	4.76	0.275851	NA	5.80762	NA
hsa00534	Glycosaminoglycan biosynthesis - heparan sulfate / heparin	22	10	45.45	0.0147983	0.571365	1	4.55	0.423679	NA	15.6193	NA
hsa00533	Glycosaminoglycan biosynthesis - keratan sulfate	14	5	35.71	-0.147181	0.570687	0	0	NaN	NA	NaN	NA
hsa00531	Glycosaminoglycan degradation	19	11	57.89	0.0361532	0.584851	0	0	NaN	NA	NaN	NA
hsa00563	Glycosylphosphatidylinositol (GPI)-anchor biosynthesis	27	18	66.67	-0.11256	0.56891	1	3.7	0.340072	NA	6.12128	NA
hsa00601	Glycosphingolipid biosynthesis - lacto and neolacto series	27	18	66.67	0.144134	0.538645	2	7.41	0.314079	0.0042386	0.302777	20.3818
hsa00603	Glycosphingolipid biosynthesis - globo and isoglobo series	16	11	68.75	0.284653	0.416424	1	6.25	0.311081	NA	14.7149	NA
hsa00604	Glycosphingolipid biosynthesis - ganglio series	14	8	57.14	0.0753846	0.555765	1	7.14	0.318714	NA	4.16358	NA
hsa00511	Other glycan degradation	14	7	50	0.130727	0.507102	0	0	NaN	NA	NaN	NA
hsa00730	Thiamine metabolism	13	6	46.15	-0.0856327	0.526168	2	15.38	0.527916	0.326235	15.646	20.6428
hsa00740	Riboflavin metabolism	8	3	37.5	0.517496	0.115116	0	0	NaN	NA	NaN	NA
hsa00750	Vitamin B6 metabolism	6	5	83.33	-0.333542	0.410053	0	0	NaN	NA	NaN	NA
hsa00760	Nicotinate and nicotinamide metabolism	35	16	45.71	-0.0396344	0.521208	4	11.43	0.347416	0.071958	8.95083	4.0613
hsa00770	Pantothenate and CoA biosynthesis	21	13	61.9	0.0959812	0.576479	1	4.76	0.74476	NA	126.111	NA
hsa00780	Biotin metabolism	3	2	66.67	-0.0647427	0.639344	0	0	NaN	NA	NaN	NA
hsa00785	Lipoic acid metabolism	18	13	72.22	0.332002	0.516348	2	11.11	0.540222	0.318312	13.9186	5.27669
hsa00790	Folate biosynthesis	23	9	39.13	0.199001	0.514511	2	8.7	0.59926	0.22534	16.8857	18.8897
hsa00670	One carbon pool by folate	35	22	62.86	0.112548	0.553431	4	11.43	0.535747	0.198898	31.5511	29.0108
hsa00830	Retinol metabolism	53	36	67.92	-0.0885735	0.564728	6	11.32	0.545392	0.200353	20.2706	23.738
hsa00860	Porphyrin metabolism	36	27	75	0.0235733	0.575195	3	8.33	0.387674	0.0139017	28	30.1083
hsa00130	Ubiquinone and other terpenoid-quinone biosynthesis	11	7	63.64	-0.258111	0.563807	0	0	NaN	NA	NaN	NA
hsa00900	Terpenoid backbone biosynthesis	21	19	90.48	0.089157	0.576728	4	19.05	0.43235	0.177773	27.4015	24.8173
hsa00232	Caffeine metabolism	6	3	50	-0.0638151	0.669114	1	16.67	0.550538	NA	2.60123	NA
hsa00524	Neomycin, kanamycin and gentamicin biosynthesis	5	1	20	-0.550926	NA	0	0	NaN	NA	NaN	NA
hsa00980	Metabolism of xenobiotics by cytochrome P450	59	33	55.93	0.0685296	0.572496	9	15.25	0.412583	0.0894353	39.0409	28.0812
hsa00982	Drug metabolism - cytochrome P450	56	37	66.07	-0.0980043	0.578369	8	14.29	0.366146	0.0655512	48.3962	28.5953
hsa00983	Drug metabolism - other enzymes	67	42	62.69	-0.011528	0.572971	9	13.43	0.419402	0.0912832	31.5955	33.6638

## Sheet: SNR total carbon
		total genes	significant spearman	% spearman	average spearman rho	Standard Deviation spearman rho	significant pearson	% pearson	average pearson r2	Standard Deviation pearson r2	average pearson slope	Standard Deviation pearson slope
hsa00010	Glycolysis / Gluconeogenesis	62	32	51.61	0.0316677	0.55498	9	14.52	0.429653	0.161535	88.4488	79.6557
hsa00020	Citrate cycle (TCA cycle)	29	19	65.52	0.372835	0.403282	6	20.69	0.471877	0.143246	58.0832	85.8656
hsa00030	Pentose phosphate pathway	29	14	48.28	0.159982	0.493984	3	10.34	0.403808	0.0875622	72.8725	82.2455
hsa00040	Pentose and glucuronate interconversions	26	10	38.46	0.00560951	0.533743	1	3.85	0.409303	NA	85.9603	NA
hsa00051	Fructose and mannose metabolism	30	11	36.67	-0.31327	0.382888	1	3.33	0.34286	NA	52.6773	NA
hsa00052	Galactose metabolism	28	7	25	-0.280527	0.499142	1	3.57	0.263338	NA	-5.83762	NA
hsa00053	Ascorbate and aldarate metabolism	22	13	59.09	0.169333	0.553573	4	18.18	0.484337	0.189061	90.947	55.3378
hsa00500	Starch and sucrose metabolism	29	9	31.03	-0.292113	0.485468	3	10.34	0.403836	0.125334	71.4228	85.5325
hsa00520	Amino sugar and nucleotide sugar metabolism	46	14	30.43	0.134679	0.476568	1	2.17	0.504147	NA	163.335	NA
hsa00620	Pyruvate metabolism	44	30	68.18	0.135212	0.534099	10	22.73	0.45719	0.163932	69.1239	74.3422
hsa00630	Glyoxylate and dicarboxylate metabolism	28	17	60.71	0.130592	0.487993	3	10.71	0.589152	0.00843364	66.6776	25.735
hsa00640	Propanoate metabolism	31	20	64.52	0.0750864	0.549134	6	19.35	0.44767	0.171073	20.8962	12.821
hsa00650	Butanoate metabolism	26	15	57.69	-0.148131	0.505417	4	15.38	0.471867	0.194077	30.7958	25.64
hsa00562	Inositol phosphate metabolism	72	25	34.72	0.28012	0.44672	7	9.72	0.377965	0.0743854	27.3845	29.5862
hsa00190	Oxidative phosphorylation	97	52	53.61	0.31148	0.435703	7	7.22	0.356337	0.0553886	14.5674	18.3091
hsa00910	Nitrogen metabolism	17	4	23.53	0.281273	0.494449	2	11.76	0.432162	0.149207	4.42077	4.28279
hsa00920	Sulfur metabolism	8	3	37.5	0.123399	0.583258	0	0	NaN	NA	NaN	NA
hsa00061	Fatty acid biosynthesis	16	9	56.25	-0.0663277	0.474447	1	6.25	0.321389	NA	6.68226	NA
hsa00062	Fatty acid elongation	22	11	50	0.0537213	0.51647	3	13.64	0.474086	0.217488	24.5015	35.3447
hsa00071	Fatty acid degradation	41	23	56.1	0.142394	0.501093	9	21.95	0.537914	0.191883	56.2652	47.1191
hsa00100	Steroid biosynthesis	20	11	55	-0.0351123	0.592918	2	10	0.453248	0.0125944	12.8999	16.5752
hsa00120	Primary bile acid biosynthesis	17	6	35.29	-0.365495	0.473301	0	0	NaN	NA	NaN	NA
hsa00140	Steroid hormone biosynthesis	47	19	40.43	-0.234826	0.479414	2	4.26	0.573181	0.231758	43.2738	60.3678
hsa00561	Glycerolipid metabolism	50	23	46	0.0834491	0.539223	5	10	0.459998	0.188528	56.2309	69.7081
hsa00564	Glycerophospholipid metabolism	87	33	37.93	-0.102109	0.530043	5	5.75	0.350643	0.0970085	-8.70553	30.4372
hsa00565	Ether lipid metabolism	39	14	35.9	-0.0654044	0.528262	0	0	NaN	NA	NaN	NA
hsa00600	Sphingolipid metabolism	48	17	35.42	-0.0254322	0.530538	2	4.17	0.385047	0.0235305	12.9092	5.01252
hsa00590	Arachidonic acid metabolism	54	19	35.19	-0.229184	0.514987	3	5.56	0.535568	0.149625	60.1052	46.932
hsa00591	Linoleic acid metabolism	25	8	32	-0.562672	0.0874272	0	0	NaN	NA	NaN	NA
hsa00592	alpha-Linolenic acid metabolism	21	8	38.1	-0.508461	0.0734436	0	0	NaN	NA	NaN	NA
hsa01040	Biosynthesis of unsaturated fatty acids	23	11	47.83	-0.0970346	0.499261	1	4.35	0.724279	NA	11.661	NA
hsa00230	Purine metabolism	113	45	39.82	0.0359695	0.524456	8	7.08	0.492594	0.21044	4.71415	25.2515
hsa00240	Pyrimidine metabolism	54	30	55.56	0.154286	0.507127	5	9.26	0.500725	0.176956	6.47524	13.0941
hsa00250	Alanine, aspartate and glutamate metabolism	34	14	41.18	-0.194438	0.515853	3	8.82	0.302013	0.025498	7.44833	16.5241
hsa00260	Glycine, serine and threonine metabolism	38	19	50	-0.0303435	0.586669	4	10.53	0.494837	0.139208	68.1859	28.4319
hsa00270	Cysteine and methionine metabolism	48	22	45.83	0.130203	0.539526	1	2.08	0.280913	NA	-0.395876	NA
hsa00280	Valine, leucine and isoleucine degradation	47	29	61.7	0.225887	0.470482	12	25.53	0.458202	0.165378	47.46	44.0186
hsa00290	Valine, leucine and isoleucine biosynthesis	4	2	50	-0.136652	0.780425	0	0	NaN	NA	NaN	NA
hsa00310	Lysine degradation	57	29	50.88	0.249064	0.46211	8	14.04	0.454706	0.192327	52.8695	52.1425
hsa00220	Arginine biosynthesis	20	9	45	-0.199685	0.524406	2	10	0.301198	0.0360043	-1.90053	4.65688
hsa00330	Arginine and proline metabolism	47	29	61.7	0.162816	0.542733	6	12.77	0.454116	0.166776	83.8348	62.7072
hsa00340	Histidine metabolism	21	10	47.62	0.324179	0.534799	6	28.57	0.404661	0.183358	59.7768	63.5596
hsa00350	Tyrosine metabolism	32	14	43.75	-0.0699353	0.529678	3	9.38	0.370939	0.0746377	15.3741	23.7972
hsa00360	Phenylalanine metabolism	15	6	40	-0.0373464	0.614316	0	0	NaN	NA	NaN	NA
hsa00380	Tryptophan metabolism	39	19	48.72	0.0299061	0.550902	6	15.38	0.523491	0.174815	56.2063	64.7405
hsa00400	Phenylalanine, tyrosine and tryptophan biosynthesis	5	2	40	0.507295	0.13372	0	0	NaN	NA	NaN	NA
hsa00410	beta-Alanine metabolism	31	20	64.52	0.0914356	0.54389	7	22.58	0.514027	0.173857	52.4927	55.4864
hsa00430	Taurine and hypotaurine metabolism	17	9	52.94	-0.178145	0.537387	1	5.88	0.364436	NA	102.621	NA
hsa00440	Phosphonate and phosphinate metabolism	5	3	60	0.274864	0.59307	0	0	NaN	NA	NaN	NA
hsa00450	Selenocompound metabolism	14	5	35.71	0.281858	0.385975	0	0	NaN	NA	NaN	NA
hsa00470	D-Amino acid metabolism	5	4	80	-0.0253544	0.737613	1	20	0.275739	NA	-5.19344	NA
hsa00480	Glutathione metabolism	53	24	45.28	0.276999	0.476925	6	11.32	0.365678	0.0603146	66.6979	41.4105
hsa00510	N-Glycan biosynthesis	51	20	39.22	-0.010558	0.552728	2	3.92	0.424456	0.0304842	2.87124	3.25852
hsa00513	Various types of N-glycan biosynthesis	39	13	33.33	-0.0317151	0.582262	2	5.13	0.424456	0.0304842	2.87124	3.25852
hsa00512	Mucin type O-glycan biosynthesis	31	13	41.94	0.153098	0.486631	3	9.68	0.476195	0.0973421	2.81489	1.03368
hsa00515	Mannose type O-glycan biosynthesis	18	9	50	0.0418398	0.516426	2	11.11	0.292736	0.0199995	7.11624	1.26398
hsa00514	Other types of O-glycan biosynthesis	42	17	40.48	0.0474965	0.496333	3	7.14	0.372509	0.149535	1.83987	6.24604
hsa00532	Glycosaminoglycan biosynthesis - chondroitin sulfate / dermatan sulfate	21	6	28.57	-0.00178194	0.518188	0	0	NaN	NA	NaN	NA
hsa00534	Glycosaminoglycan biosynthesis - heparan sulfate / heparin	22	7	31.82	0.101316	0.566139	1	4.55	0.50129	NA	22.9878	NA
hsa00533	Glycosaminoglycan biosynthesis - keratan sulfate	14	5	35.71	-0.0939526	0.57037	0	0	NaN	NA	NaN	NA
hsa00531	Glycosaminoglycan degradation	19	8	42.11	0.132447	0.546614	0	0	NaN	NA	NaN	NA
hsa00563	Glycosylphosphatidylinositol (GPI)-anchor biosynthesis	27	16	59.26	-0.00892361	0.541533	1	3.7	0.359159	NA	8.51157	NA
hsa00601	Glycosphingolipid biosynthesis - lacto and neolacto series	27	16	59.26	0.114083	0.523357	2	7.41	0.374838	0.00925984	0.735281	30.1367
hsa00603	Glycosphingolipid biosynthesis - globo and isoglobo series	16	7	43.75	0.360773	0.376087	1	6.25	0.381386	NA	22.0451	NA
hsa00604	Glycosphingolipid biosynthesis - ganglio series	14	5	35.71	0.0663326	0.583005	0	0	NaN	NA	NaN	NA
hsa00511	Other glycan degradation	14	6	42.86	0.213684	0.525554	1	7.14	0.269663	NA	7.66314	NA
hsa00730	Thiamine metabolism	13	3	23.08	-0.135609	0.540925	1	7.69	0.675674	NA	38.6183	NA
hsa00740	Riboflavin metabolism	8	2	25	0.472547	0.0285079	0	0	NaN	NA	NaN	NA
hsa00750	Vitamin B6 metabolism	6	3	50	-0.190593	0.53901	0	0	NaN	NA	NaN	NA
hsa00760	Nicotinate and nicotinamide metabolism	35	12	34.29	0.0165943	0.499983	3	8.57	0.355737	0.0269065	10.391	5.77985
hsa00770	Pantothenate and CoA biosynthesis	21	8	38.1	0.187605	0.517491	1	4.76	0.737898	NA	169.845	NA
hsa00780	Biotin metabolism	3	1	33.33	-0.471991	NA	0	0	NaN	NA	NaN	NA
hsa00785	Lipoic acid metabolism	18	11	61.11	0.271887	0.475189	2	11.11	0.52338	0.193884	18.7229	4.8963
hsa00790	Folate biosynthesis	23	8	34.78	0.246034	0.468836	3	13.04	0.449094	0.20629	19.184	17.5343
hsa00670	One carbon pool by folate	35	19	54.29	0.239928	0.464776	5	14.29	0.47862	0.204972	36.4874	35.6598
hsa00830	Retinol metabolism	53	27	50.94	-0.0438189	0.543972	7	13.21	0.455491	0.166205	73.1969	126.599
hsa00860	Porphyrin metabolism	36	24	66.67	0.0139384	0.537117	3	8.33	0.375263	0.046334	37.8797	41.6809
hsa00130	Ubiquinone and other terpenoid-quinone biosynthesis	11	6	54.55	-0.144671	0.489874	0	0	NaN	NA	NaN	NA
hsa00900	Terpenoid backbone biosynthesis	21	15	71.43	0.0322452	0.492769	3	14.29	0.46582	0.147987	48.4337	26.6931
hsa00232	Caffeine metabolism	6	2	33.33	0.153024	0.828463	1	16.67	0.624529	NA	3.74863	NA
hsa00524	Neomycin, kanamycin and gentamicin biosynthesis	5	0	0	NaN	NA	0	0	NaN	NA	NaN	NA
hsa00980	Metabolism of xenobiotics by cytochrome P450	59	24	40.68	0.111615	0.548426	9	15.25	0.387162	0.0734746	49.3769	37.6148
hsa00982	Drug metabolism - cytochrome P450	56	29	51.79	-0.0803463	0.551302	6	10.71	0.365804	0.0710665	61.0502	39.975
hsa00983	Drug metabolism - other enzymes	67	33	49.25	0.0610312	0.532042	9	13.43	0.418485	0.100257	39.6214	44.3036
