# Supplementary material for: Deconvolving metabolic intratumoral heterogeneity in clear cell renal carcinoma with hyperpolarized 13C-pyruvate MRI
Source: Research Square preprint supplement (doi:10.21203/rs.3.rs-7989219/v1), 2026-01-29
Supplement: Supplementary file 6 [file d53e81314fbdbfe5fcc4a633.xlsx]

## Sheet: Sheet1
Patient ID	Biopsy ID	kPL_mean_final	SNRPyr	SNRLac	totalC-SNR_mean_final	corrected-normalized_LPratio_mean_final			legend:
TB19.03488	NL1	0.003754	31.1755	2.57369	35.42	0.118			normal tissue
TB19.03488	NL2	0.003754	31.1755	2.57369	35.42	0.118			Tumor
TB19.03488	TL1	0.012471	28.6218	9.63624	37.56	0.231
TB19.03488	TL2	0.012471	28.6218	9.63624	37.56	0.231
TB19.03488	TL3	0.014925	24.2345	9.82603	33.41	0.26
TB19.03488	TL5	0.008588	33.257	8.73323	41.43	0.193
TB19.03488	TL6	0.008588	33.257	8.73323	41.43	0.193
TB19.03488	TL7	0.017209	27.6713	13.1136	39.18	0.284
TB19.03488	TL8	0.009625	35.376	9.28116	43.9	0.193
TB19.03488	TL9	0.012296	29.2554	9.66073	38.19	0.228
TB20.00210	n1a	0.009082	33.4429	7.45493	32.29	0.097
TB20.00210	n2a	0.009082	33.4429	7.45493	32.29	0.097
TB20.00210	n3b	0.009082	33.4429	7.45493	32.29	0.097
TB20.00210	t1	0.008447	66.3713	7.62885	56.56	0.245
TB20.00210	t2	0.008447	66.3713	7.62885	56.56	0.245
TB20.00210	t3	0.007388	107.093	10.9931	89.23	0.186
TB20.00210	t4	0.007388	107.093	10.9931	89.23	0.186
TB20.00210	t5	0.007388	107.093	10.9931	89.23	0.186
TB20.00210	t6	0.008827	132.757	12.2272	109.26	0.211
TB20.00210	t7	0.008827	132.757	12.2272	109.26	0.211
TB20.00914	t1	0.005133	39.2313	2.84656	31.13	0.091
TB20.00914	t2	0.005133	39.2313	2.84656	31.13	0.091
TB20.00914	t3	0.006616	48.7006	3.88365	38.31	0.104
TB20.00914	t4	0.006616	48.7006	3.88365	38.31	0.104
TB19.03264	n1 site 1	0.007297	32.3357	5.35625	26.48	0.133
TB19.03264	n1 site2	0.007297	32.3357	5.35625	26.48	0.133
TB19.03264	n1 site 3	0.007297	32.3357	5.35625	26.48	0.133
TB19.03264	t2 site 1	0.002782	40.2346	4.79603	31.58	0.104
TB19.03264	t2 site 2	0.001783	15.4607	1.17851	12.88	0.091
TB19.03264	t1 sit 3	0.002858	13.0098	1.73532	11.49	0.13
TB19.03264	t1 site 4	0.002858	13.0098	1.73532	11.49	0.13
TB19.03264	t1 site5	0.001783	15.4607	1.17851	12.88	0.091
TB19.03529	nl1	0.00136	8.89466	0.167473	9.38	0.137
TB19.03529	nl2	0.00136	8.89466	0.167473	9.38	0.137
TB19.03529	tl1	0.040028	15.4184	21.4089	31.59	0.487
TB19.03529	tl2	0.040028	15.4184	21.4089	31.59	0.487
TB19.03529	tl3	0.03373	10.1151	16.6549	23.33	0.515
TB19.03529	tl4	0.007552	25.6542	7.63297	32.39	0.202
TB19.03529	tl5	0.012798	45.5998	18.2206	58.62	0.235
TB19.03529	tl6	0.012798	45.5998	18.2206	58.62	0.235
TB19.03529	tl7	0.006903	17.9407	8.28325	25.37	0.283
TB19.03529	tl8	0.006903	17.9407	8.28325	25.37	0.283
TB19.03529	tl9	0.006903	17.9407	8.28325	25.37	0.283
TB18.5780	n1	0.004364	11.6888	2.64573	20.12	0.121
TB18.5780	n2a	0.004364	11.6888	2.64573	20.13	0.121
TB18.5780	n3b	0.004364	11.6888	2.64573	20.14	0.121
TB18.5780	n4	0.004364	11.6888	2.64573	20.15	0.121
TB18.5780	t1	0.005474	12.153	2.52731	20.66	0.113
TB18.5780	t2	0.005475	12.153	2.52731	20.66	0.113
TB18.5780	t3	0.005476	12.153	2.52731	20.66	0.113
TB18.5780	t4	0.004409	16.8671	2.93669	27.1	0.097
TB18.5780	t5	0.004409	16.8671	2.93669	27.12	0.097
TB18.5780	t6	0.004409	16.8671	2.93669	27.11	0.097
TB18-2087 N1	N1	0.004916	9.64297	3.38933	15.47	0.252
TB18-2087 T1	T1	0.024607	8.69452	7.50844	20.33	0.468
TB18-2087 T2	T2	0.024607	8.69452	7.50844	20.33	0.468
TB18-2087 T3	T3	0.027315	10.9768	8.96457	24.26	0.45
TB18-2087 T4	T4	0.027315	10.9768	8.96457	24.26	0.45
TB18-2087 T5	T5	0.022236	11.3953	7.2688	23	0.394
TB18-2087 T6	T6	0.022236	11.3953	7.2688	23	0.394
TB18-2087 T7	T7	0.015227	15.7961	7.639	25.39	0.297
TB18-2087 T8	T8	0.015227	15.7961	7.639	25.39	0.297
TB18-2087 T9	T9	0.017916	16.0114	9.00261	26.74	0.327
TB18-2087 T10	T10	0.017916	16.0114	9.00261	26.74	0.327
TB18-2087 T11	T11	0.022153	9.82868	7.37626	21.42	0.438
TB18-2087 T12	T12	0.007898	11.276	4.02685	18.75	0.289
TB18-2087 T13	T13	0.027552	10.9231	9.07095	24.43	0.457
TB18-2087 T14	T14	0.035199	11.9564	10.7022	27.31	0.478
TB18-2087 T15	T15	0.015938	8.46168	3.90521	16.18	0.357
