# Supplementary material for: Deconvolving metabolic intratumoral heterogeneity in clear cell renal carcinoma with hyperpolarized 13C-pyruvate MRI
Source: Research Square preprint supplement (doi:10.21203/rs.3.rs-7989219/v1), 2026-01-29
Supplement: Supplementary file 7 [file e3e4635402add24364945276.xlsx]

## Sheet: countsddsNormalised - Copy
Patient ID	TB18-2087 T7	TB18-2087 T7	TB18-2087 T7	TB18-2087 T7	TB18-2087 T7	TB18-2087 T7	TB18-2087 T7	TB18-2087 T7	TB18-2087 T7	TB18-2087 T7	TB18-2087 T7	TB18-2087 T7	TB18-2087 T7	TB18-2087 T7	TB18-2087 T7	TB18-2087 T7	TB18.5780	TB18.5780	TB18.5780	TB18.5780	TB18.5780	TB18.5780	TB18.5780	TB19.03488	TB19.03488	TB19.03488	TB19.03488	TB19.03488	TB19.03488	TB19.03488	TB19.03488	TB19.03488	TB19.03488	TB20.00210	TB20.00210	TB20.00210	TB20.00210
SampleID	T1	N1	T2	T3	T4	T5	T6	T7	T8	T9	T10	T11	T12	T13	T14	T15	T1	N1	T2	T3	T4	T5	T6	N1	NL2	TL1	TL2	TL3	TL4	TL5	TL6	T7	T8	N1B	N2B	N3A	T3B
TSPAN6	1019.87	3268.1	1251.07	986.872	870.146	848.622	1010.97	575.19	832.636	1101.01	1730.74	1965.29	1866.39	1684.56	1910.7	2599.59	1488.91	2778.43	1347.31	1121.6	1111.03	1119.6	1125.2	2982	3477.65	1011.3	882.626	1057.77	999.773	1348	971.154	849.155	986.838	3497.63	3633.01	3453.92	1678.25
TNMD	4.38842	87.1623	4.22089	0.834211	1.00595	2.09795	0	1.00734	5.30342	4.32899	2.45843	0	3.51706	1.17228	7.07014	3.4925	15.8154	85.4396	0	0	3.7233	7.60486	4.85837	24.6957	25.2516	0	0	0.874912	1.47568	0	0	0	0	42.5929	54.5438	29.2606	25.1084
DPM1	1389.37	1191.87	1410.62	1241.31	1213.17	1147.58	1131.07	1164.48	1180.54	1220.77	1686.48	1355.85	1242.7	1201.59	1603.15	2146.73	1070.93	1381.82	1602.71	1332.6	1111.03	1110.31	1091.19	1529.37	1625.2	1515.72	1288.78	1341.24	1201.2	1075.39	1103.69	1311.8	1296.28	1441.9	1437.62	1549.64	1037.48
SCYL3	374.771	548.437	347.801	282.798	313.856	315.742	345.692	479.493	289.567	324.674	328.201	313.424	338.81	286.036	281.038	261.938	389.737	504.422	359.037	379.131	368.607	409.818	441.14	438.348	445.439	347.25	327.923	311.469	313.582	342.348	272.685	349.263	374.998	407.138	455.831	459.976	430.861
C1orf112	105.322	57.7817	110.587	119.292	76.4521	116.436	132.637	203.482	68.9444	46.1759	92.1912	105.636	112.546	113.711	160.846	161.819	101.67	64.0797	122.147	120.735	104.253	102.243	87.4506	69.6771	70.7046	219.706	159.615	166.233	154.209	114.116	163.001	193.667	199.482	57.6257	36.0379	58.5211	108.468
FGR	379.159	273.239	550.404	826.703	695.111	665.051	650.653	3751.33	792.33	505.049	307.304	1072.61	1381.03	1099.6	2258.91	1656.61	363.754	184.024	235.657	171.512	478.072	414.887	518.874	196.683	219.184	2124.64	1226.35	973.777	930.416	687.867	687.805	1541.06	1724.15	300.656	274.667	256.323	1069.62
CFH	1830.85	431.894	2215.12	2812.13	1973.67	3542.39	6461.62	2278.6	2716.41	1447.32	3468.85	3664.74	3301.35	2895.53	4630.94	7936.13	3053.5	1240.52	3427.51	1656.44	1533.26	2133.59	3180.29	1453.52	1879.73	16792.3	16079.3	17241	15602.4	13806.5	12215.2	20796.9	21127.5	1232.69	1057.76	999.541	657.841
FUCA2	1123.43	2072.31	1228.28	1149.54	1157.85	1071	1038.12	1806.16	1454.2	1225.1	1804.49	1904.92	1723.36	1616.57	2161.69	2741.62	2414.11	2515.54	1677.97	1735.43	1875.06	1896.15	1632.41	3331.27	3253.42	3247.86	3219.17	3455.9	3383	3613.68	3181.58	3256.75	3771.84	3081.72	2919.07	3142.58	1907.24
GCLC	760.074	772.708	950.544	818.361	666.944	791.977	857.442	1530.15	620.5	611.83	1105.07	818.385	759.685	682.266	1138.29	932.499	1196.32	911.903	1677.97	1259.26	1398.47	1229.45	1570.22	1745.46	1723.17	1134.73	1221.61	1153.13	1139.96	1325.01	1091.5	979.922	1146.14	2003.12	1909.03	1890.23	1477.38
NFYA	554.696	876.52	476.116	481.34	458.713	583.231	607.833	874.37	523.978	526.693	657.631	602.471	592.039	649.442	645.15	660.083	602.115	542.213	811.843	784.215	732.746	588.109	652.964	603.28	639.371	841.794	726.961	764.673	770.305	691.037	671.81	704.319	712.638	559.972	513.296	640.221	623.694
STPG1	410.756	595.446	463.454	397.085	376.225	317.84	293.473	206.504	425.334	525.25	534.709	511.926	392.739	486.496	399.463	441.22	231.583	529.068	204.811	234.7	260.631	243.356	230.287	447.168	426.248	418.017	349.258	347.34	376.298	446.955	411.312	397.266	419.406	542.434	498.686	498.6	331.431
NIPAL3	2764.7	2645.23	3158.07	2868.02	2968.56	2424.18	1682.51	1518.06	3322.06	3432.89	3553.66	2602.58	2162.99	2418.41	1698.6	2001.2	1459.54	3092.26	1281.92	1164.47	1361.98	1346.06	1338.97	2173.22	2039.32	1728.02	1811.08	1758.57	2007.66	2585.05	2338.39	2401.8	2291.58	2120.88	2406.75	2319.78	2085.01
LAS1L	1737.81	1395.58	1570.17	1509.92	1397.26	1252.48	1242.82	1215.86	1437.23	1461.75	1789.74	1214.23	1322.42	1209.79	1355.7	1210.73	1542	1406.47	2041.95	2136	1642.72	1665.46	1596.46	1461.45	1468.63	1660.55	1815.82	1710.45	1691.13	1680.84	1898.89	1702.45	1632.51	1502.03	1592.49	1574.22	2247.71
ENPP4	782.894	1215.38	1091.52	787.495	634.754	564.349	618.277	961.001	617.318	730.156	1385.33	853.21	634.244	621.308	917.35	917.364	1779.23	1500.12	1954.35	1976.9	1684.42	1595.33	1481.8	2000.35	2000.94	956.995	984.559	1052.52	1015.27	1146.71	878.989	1010.54	1066.49	1634.82	1644.11	1769.68	1959.46
SEMA3F	3574.8	2781.36	2534.22	4478.88	3074.18	2512.3	2582.77	738.379	3982.87	3056.27	5991.2	1793.48	1844.11	2192.16	961.539	1444.73	8804.67	2711.06	5796.41	4261.84	7197.89	6911.97	6397.5	1789.55	1653.48	1307.54	1446.02	1529.35	1900.68	1634.08	1885.18	870.674	781.012	1970.55	2116.5	2255.4	6732.08
CFTR	32.4743	49.9469	28.702	27.529	19.113	29.3713	45.953	9.06605	12.7282	17.3159	7.3753	5.80415	3.51706	3.51684	7.07014	11.6417	167.191	144.59	34.5465	76.7289	233.079	164.772	250.692	263.715	212.114	18.1031	14.2232	26.2474	21.3974	38.8312	41.1312	18.208	12.6879	130.284	181.163	255.152	29.1258
ANKIB1	2005.51	1567.94	2424.48	1595.01	1346.97	1433.95	1789.04	1928.05	1244.18	1279.94	2087.21	1669.27	1485.37	1504.03	1827.63	1521.57	3091.91	1445.9	2108.57	2257.86	2530.36	2881.4	2992.75	3292.46	3297.86	2361.63	2273.33	2093.66	1822.47	1791.78	1844.81	2275.17	2326.82	3728.14	3359.32	3287.72	2650.45
CYP51A1	6.14378	26.4425	10.1301	13.3474	7.04164	4.1959	7.31071	21.1541	5.30342	1.443	25.8135	3.48249	3.51706	7.03367	30.0481	11.6417	19.2044	57.5074	29.6113	49.6481	35.7437	21.9696	14.5751	206.385	166.661	65.8294	42.6695	71.7428	61.2407	53.0957	56.365	71.1768	52.8663	120.262	117.854	106.508	68.295
KRIT1	1605.28	1107.65	1642.77	1169.56	1127.67	1084.64	1086.16	1285.36	767.935	769.117	838.326	868.301	967.192	1016.37	906.745	761.366	1527.32	918.475	1418.87	1905.81	1744	1786.3	1926.83	1283.29	1289.85	1491.04	1553.48	1528.47	1373.12	1452.6	1367.99	1650.31	1696.66	1435.63	1402.56	1298	1375.94
RAD52	1369.19	478.903	1029.05	1052.77	1015	959.813	952.481	679.954	777.481	681.094	540.855	383.074	512.319	568.555	362.345	356.235	401.034	233.316	393.583	477.299	429.669	529.805	612.154	170.224	167.671	208.186	243.374	214.353	216.187	263.894	284.11	230.083	228.383	180.394	187.007	201.313	415.796
MYH16	21.9421	0.979352	18.5719	20.8553	18.1071	34.6162	22.9765	17.1248	20.153	23.0879	4.91687	23.2166	25.7918	30.4792	10.6052	27.94	4.51869	6.57227	3.70141	14.6688	12.6592	8.44985	7.77339	6.17392	0	21.3946	15.8035	14.8735	4.42704	14.2645	6.8552	26.4844	16.9172	1.25273	3.89599	0	8.0347
BAD	562.595	439.729	447.414	571.435	714.224	481.48	338.381	317.312	939.765	1122.65	769.489	644.261	577.971	657.648	461.326	500.592	443.961	443.629	350.4	415.239	382.011	463.052	340.086	678.249	651.492	921.612	1099.92	1105.89	1138.49	1134.03	1408.36	960.886	821.895	851.859	855.169	859.09	791.418
LAP3	1712.36	2751.98	2521.56	2113.06	1944.5	2357.05	2892.95	6713.91	2186.07	2310.24	3643.4	3682.15	3446.72	2799.4	5695	4668.31	2180.27	3080.75	3555.82	2572.68	2968.96	2060.07	2649.75	6711.93	6694.71	4963.54	5533.6	4973	5210.63	3435.37	2889.85	3585.32	3707.69	5390.51	5338.48	5559.51	2403.38
CD99	5564.51	2763.73	4636.22	7211.76	6313.34	5621.46	5875.72	6221.32	7426.9	7825.37	11351.8	4189.44	3887.53	3393.75	5923.01	5450.63	13434.1	5114.87	11428.7	8963.74	9924.84	9936.17	10789.5	4342.91	4458.43	8640.93	8018.7	8656.38	10244.2	8322.55	7982.5	8572.66	8128.02	4258.04	3661.25	3912.72	12538.2
HS3ST1	366.872	1730.51	391.698	547.243	384.273	557.006	556.658	794.79	546.252	458.873	580.19	963.489	668.242	824.112	1208.99	1061.72	424.757	280.965	425.662	373.489	496.689	394.608	450.856	229.317	254.536	510.178	333.454	391.961	327.601	226.647	235.362	185.391	204.416	274.349	195.773	202.483	351.518
AOC1	8802.29	2026.28	12158.7	8480.59	7876.58	4475.98	2008.36	2761.12	7878.75	10580	15146.4	8061.97	3107.91	4998.6	6644.16	4373.78	25078.7	4589.09	5619.98	9056.27	16494.2	20555.9	13643.3	3771.38	3544.32	114.379	96.4014	49.87	94.4435	42.7935	19.8039	98.4888	64.1445	29682.3	26821	28332.4	17468.4
WNT16	0	0	6.75342	3.33685	2.0119	9.44079	13.577	8.05871	4.24273	4.32899	0	12.7691	5.86177	16.4119	7.07014	5.82084	3.38902	4.92921	16.0395	6.7702	6.70195	6.75988	9.71673	2.64597	2.02013	7.40581	11.8526	5.24947	6.64056	2.37742	6.8552	4.96582	11.983	0	2.92199	1.17042	3.01301
HECW1	117.61	209.581	108.055	86.758	76.4521	57.6937	102.35	70.5137	99.7042	92.3517	108.171	119.566	158.268	175.842	118.425	124.566	5.64836	456.773	23.4423	9.02693	4.46796	9.29483	6.80171	1433.23	1252.48	226.289	282.883	623.812	644.134	431.105	313.054	263.189	266.446	1241.46	1282.75	1431.43	1.00434
MAD1L1	1308.63	752.142	1200.42	1419.83	1510.94	1439.2	1255.35	1277.31	1810.59	1783.54	1674.19	1930.46	1696.4	1641.19	1765.77	1444.73	1401.92	765.67	1842.07	1508.63	1416.34	1388.31	1275.81	814.957	833.304	1263.92	1363.05	1324.62	1379.76	1603.97	1625.44	1349.88	1184.91	1083.61	1017.83	881.328	1267.47
LASP1	5637.36	4189.67	5916	6647	6921.94	6996.67	6123.24	7586.27	6872.17	7569.96	9096.2	8238.41	7772.71	6693.71	8203.13	8957.11	7225.38	4534.87	6001.22	5431.96	6108.45	6237.68	5944.7	5117.3	5114.97	8289.57	7641.79	7619.61	8040.24	7945.33	8028.97	7807.1	7575.39	6752.23	6504.35	6185.68	9724
SNX11	802.203	980.331	835.736	971.022	1023.05	863.307	646.476	1057.71	1174.18	1406.92	1119.82	1185.21	1173.53	1072.64	1129.45	902.23	698.137	1204.37	814.311	698.459	740.937	637.963	631.588	1176.57	1184.81	1061.5	924.505	786.546	796.867	701.339	617.73	830.12	803.568	1233.94	1208.73	1246.5	702.032
TMEM176A	19606.6	4297.39	19337.6	21727	21845.2	15370.6	9470.5	10476.3	23967.2	29375.1	35563.7	17651.6	12122.1	13500	16740.3	16514.9	33543.4	3356.79	27579.2	30922.9	32336.9	30487	23641.8	18992.7	19426.6	2297.45	3707.5	8565.39	14720.6	6682.93	9520.35	3011.77	2440.31	14338.8	13434.3	12854.8	22733.2
M6PR	2984.12	1108.63	4193.88	2964.79	2478.66	2320.34	2097.13	5043.75	2214.71	2461.75	4588.66	3010.03	2677.66	2499.3	4814.76	4305.09	1443.72	1488.62	2048.11	1981.41	1853.46	1334.23	1502.21	2779.15	2818.08	4017.24	2928.39	2902.08	2819.29	2152.36	1898.89	2923.21	3110.65	2286.24	2364.86	2297.54	1804.79
KLHL13	111.466	1079.25	166.303	149.324	159.946	247.558	303.917	59.433	93.3401	129.87	245.843	87.0623	112.546	101.988	125.495	97.7901	282.418	727.879	301.048	248.241	229.356	250.96	228.343	1293	1426.21	435.297	485.168	524.947	517.226	765.529	532.421	466.787	521.614	1385.52	1406.45	1290.98	272.176
CYP26B1	112.343	301.64	141.822	150.158	16.0952	38.8121	40.7311	157.145	60.4589	15.873	27.0428	39.4682	26.9641	15.2396	33.5832	64.0292	549.021	594.791	78.9635	449.09	456.477	738.517	332.312	717.939	622.2	361.239	425.905	246.725	282.593	143.438	348.092	371.609	396.85	348.26	381.807	424.863	849.67
ICA1	502.035	1215.38	520.858	485.511	583.451	589.525	562.925	367.679	669.291	506.492	381.057	167.16	239.16	235.628	183.824	128.058	385.218	1252.02	287.476	169.255	334.353	435.167	445.026	893.454	798.962	171.979	286.043	331.592	329.077	891.532	404.457	213.53	245.3	801.75	943.803	921.123	443.917
DBNDD1	803.958	652.248	828.983	1395.64	1565.26	955.617	380.157	480.501	1692.85	1848.48	2283.88	1074.93	1092.63	1194.55	1074.66	925.514	76.8177	364.761	67.8592	100.425	93.0826	67.5988	64.1304	550.361	530.284	1037.64	882.626	813.668	667.007	1597.63	1214.13	1843.97	2275.37	764.168	667.188	613.301	672.906
ALS2	1038.3	888.272	1181.85	1065.29	900.325	883.238	929.505	1062.74	795.512	975.465	989.519	696.498	662.38	724.468	749.435	712.471	1004.28	788.673	1111.66	1159.96	1106.57	1085.81	1132	1346.8	1246.42	1167.65	1062	1098.89	1056.59	845.569	1090.74	929.436	900.137	1129.97	1222.37	1267.57	960.147
CASP10	579.271	920.591	637.354	805.014	1075.36	1077.3	1164.49	1567.42	878.246	616.159	483.082	1247.89	1253.25	1103.11	1025.17	905.723	1148.88	543.856	857.494	793.242	974.016	992.857	1089.25	452.46	430.288	598.225	571.297	685.931	786.538	687.867	700.754	713.423	675.279	437.204	420.767	404.966	747.227
CFLAR	15422.7	7078.75	14665.9	13800.4	13032.1	12987.4	11961.4	11950.1	12290.1	11353.5	8978.2	9116	8988.44	10015.9	9606.55	8230.67	7775.53	5385.98	7026.51	7133.53	9894.31	8862.2	9379.56	6276.23	6127.06	7799.96	9377.8	9222.45	9045.18	8167.23	10239.4	10372.8	9854.28	6227.34	6191.7	5817	8506.74
TFPI	4632.41	1933.24	4622.72	4203.59	3594.26	2933.99	2896.09	2751.04	3814.22	5050.49	6570.16	6685.22	3881.66	5452.27	8390.49	11375.1	6692.18	1736.72	13479.3	10179	5363.79	4962.59	5137.24	2720.93	2896.87	21030	22120.2	19129.1	19740.9	12602.7	19844.3	18760	16902.4	2219.84	2165.2	2296.37	8466.57
NDUFAF7	689.859	603.281	660.991	543.906	518.064	589.525	550.392	591.308	493.218	484.847	451.122	376.109	417.358	365.751	408.3	408.623	578.392	483.062	619.37	590.136	559.985	572.9	615.069	678.249	704.016	481.378	535.739	488.201	472.218	507.183	496.621	435.337	509.631	655.18	634.072	711.617	571.468
RBM5	2885.82	3770.5	2475.97	2555.19	2459.55	2857.41	3248.04	4485.68	2020.6	1564.21	996.895	1786.52	2103.2	2072.59	1688	1641.48	2089.89	2669.99	1591.61	1842.62	2213.13	2712.4	2695.42	1909.5	1738.32	1333.05	1366.21	1302.74	1317.04	1377.32	1337.53	1412.78	1559.91	1599.74	1674.3	1701.79	2251.73
MTMR7	82.5022	73.4514	78.5085	61.7316	64.3807	71.3304	67.8852	64.4697	53.0342	72.1498	55.3147	61.524	64.4795	60.9585	68.9338	98.9543	30.5011	70.652	45.6508	33.851	43.1903	52.389	52.4704	111.131	114.137	74.881	73.4863	79.617	67.8813	64.9828	66.267	76.1426	54.981	95.2078	136.36	118.213	31.1345
SLC7A2	3228.12	2750.02	3803.02	5645.11	3655.62	4630.18	6458.49	3238.59	2180.76	4064.92	8421.36	4952.1	3956.69	5148.65	11031.2	24246.1	1767.94	931.62	3907.46	3306.11	1641.98	2154.71	2732.35	1225.96	1412.07	5186.54	2943.4	5687.8	4843.18	1876.58	2384.85	6157.62	2992.23	874.408	822.054	752.582	420.818
ARF5	2690.1	2669.71	2307.14	2901.39	3289.45	2502.86	2293.47	2158.73	3889.53	4401.14	4147.38	2982.17	2831.23	2918.97	2923.5	3285.28	3276.05	2908.23	3634.79	3285.8	2930.98	2793.52	2538.01	2984.65	3107.97	5208.75	5078.46	5147.11	4738.41	5294.51	5713.43	4465.93	4302.61	3072.96	2979.46	3074.7	2906.55
SARM1	373.015	125.357	370.594	391.245	412.439	375.533	322.716	286.084	383.967	385.28	459.727	364.501	388.049	373.957	330.529	258.445	119.745	113.372	85.1325	94.7828	131.805	145.337	119.516	224.025	198.983	232.049	268.66	264.223	256.768	301.932	263.544	349.263	280.544	197.932	224.993	208.335	223.967
POLDIP2	4193.57	5445.2	4462.32	4866.79	5423.07	4015.48	2951.44	2904.16	5794.51	7096.65	7407.26	4736.19	4481.91	4399.56	5276.09	5184.04	3603.65	5731.02	3236.27	3523.89	3454.48	3303.04	3059.8	9829.76	10359.2	7079.13	7932.57	7923.2	7505.31	6821.61	8159.22	6536.68	6460.97	9753.78	9884.12	9433.61	3901.85
PLXND1	5661.94	2324	5172.28	6150.64	4985.48	7576.76	8771.81	13191.1	7059.91	4606.04	5779.78	7475.75	7932.15	8227.05	8613.19	8542.66	15873	3144.83	11406.5	8568.82	11790.2	13779.2	13436.3	2308.16	2343.35	6333.61	6987.52	6495.35	7901.53	4996.54	7514.06	6296.66	6544.85	2761.02	2472	2485.98	12742
AK2	8393.29	6249.24	9904.74	7973.39	7884.63	6484.77	5878.85	5227.08	7828.9	8829.69	10844.1	5294.55	4816.03	4845.03	7393.6	7056.02	3341.57	6741.51	4885.86	4211.06	3565.44	2995.47	3080.2	9483.14	9701.68	5359.34	5528.86	5856.66	5554.46	5120.17	5026.39	5637.86	5770.18	9610.97	9730.23	9469.89	5311.94
CD38	145.695	26.4425	152.796	173.516	459.719	593.721	467.885	1810.19	228.047	202.019	207.738	853.21	805.407	450.155	620.405	798.619	101.67	52.5782	117.211	56.4183	174.995	77.7386	164.213	53.8013	77.775	720.832	711.948	471.578	705.375	643.488	536.991	548.723	551.924	45.0984	26.2979	33.9423	66.2863
FKBP4	3725.77	4441.36	4317.97	3963.34	3930.24	2794.47	2184.86	2616.06	3966.96	4621.92	5967.85	2863.77	2771.44	2548.53	4553.17	4000.08	1836.85	4130.67	2982.1	2582.83	1839.31	1695.88	1671.28	5350.14	5294.76	3522.7	2881.77	2886.33	2663.6	2460.63	2777.12	2625.26	2625.69	6571.84	6847.2	6556.71	2302.95
KDM1A	1500.84	1898.96	1502.64	1516.6	1426.44	1495.84	1686.69	1751.76	1343.89	1434.34	1760.24	1575.25	1799.56	1485.28	1751.63	1981.41	1373.68	2229.64	1460.82	1298.75	1321.03	1297.9	1385.61	2116.77	2158.51	2509.75	1998.35	2134.79	2071.86	2252.21	2007.81	2207.31	2348.67	2292.5	2464.21	2482.47	2121.16
RBM6	3573.93	6704.64	2758.77	3686.38	3951.37	4375.28	5139.43	5563.53	3439.8	2551.22	1124.73	2509.72	4234.54	3514.49	2170.53	2147.89	2340.68	4189.82	1813.69	2151.8	2656.2	3456.83	3620.45	2518.08	2309.01	1885.19	2519.08	2049.04	2084.4	2293.42	2538.71	2218.89	2062.49	2206.06	2376.55	2319.78	3819.5
CAMKK1	406.367	500.449	360.464	441.298	373.207	393.366	426.11	749.46	434.88	281.384	245.843	257.704	365.774	315.343	517.888	415.608	499.315	220.171	773.595	847.403	836.254	629.514	710.293	132.298	127.268	1041.75	822.573	817.168	812.362	744.132	810.437	1089.17	1084.82	162.855	152.918	177.904	1057.57
RECQL	1190.14	542.561	1615.76	1182.91	930.503	1161.22	1382.77	1481.8	920.673	930.732	1782.36	1433.63	1228.63	1226.2	1829.4	2245.68	767.047	512.637	1001.85	911.72	830.297	709.787	815.234	733.814	745.428	1421.92	1337.77	1371.86	1219.65	1095.99	848.522	1115.65	1091.87	665.202	694.46	747.9	932.025
CCDC132	617.011	642.455	704.888	603.969	547.236	589.525	563.969	837.099	518.674	480.518	646.568	607.114	622.52	614.274	645.15	655.427	944.406	900.402	930.288	988.449	980.718	910.048	976.532	897.864	992.894	840.148	772.001	750.675	652.251	642.696	647.436	873.157	931.857	927.023	1005.16	989.007	752.249
HSPB6	42.1288	281.074	19.4161	41.7106	14.0833	73.4283	366.58	43.3156	29.6991	25.9739	17.209	110.279	144.2	94.9546	137.868	278.236	65.521	80.5104	33.3127	31.5943	46.169	228.146	211.825	262.833	429.278	7.40581	37.9284	19.2481	42.0569	126.796	47.2247	12.4146	11.2781	264.327	69.1538	62.0324	70.3036
ARHGAP33	781.138	639.517	521.702	566.429	674.992	757.361	724.805	618.506	599.286	425.684	298.7	359.857	500.595	555.66	360.577	379.519	544.502	427.198	366.44	662.351	780.404	1088.34	999.852	276.062	272.718	852.491	1016.96	923.032	972.473	790.096	1265.93	1208.35	1210.29	350.765	312.653	307.821	1516.55
NDUFAB1	2773.48	2813.68	3274.57	3187.52	3184.84	2504.96	2158.75	1698.37	3204.32	4268.38	5144.27	2448.19	2273.19	2142.93	3299.99	4081.57	1957.72	2944.38	1824.8	1786.2	1744	1740.67	1663.5	4084.49	4189.75	2561.59	2176.14	2285.27	2059.31	2025.56	2032.95	2192.41	2215.45	3564.03	3508.34	3642.36	1874.09
PDK4	25089.5	11640.6	25773.6	17576.8	14617.4	11325.8	11094.5	10363.5	12134.2	10012.9	16957	17385.8	12585.2	18126.9	22207.3	22264.7	76171.5	20425	72104.7	91616.6	102274	82676.7	80516.7	24252	24389	2505.63	2425.05	5101.61	4700.04	12731.1	4504.63	5274.53	4649.42	20875.6	21560.4	24255.8	92436.2
SLC22A16	0.877683	0	6.75342	5.00527	11.0654	3.14693	1.04439	14.1027	4.24273	5.77198	4.91687	11.6083	5.86177	8.20595	10.6052	9.31334	3.38902	13.1445	18.5071	11.2837	1.48932	7.60486	11.6601	2.64597	6.06039	13.1659	4.74105	5.24947	5.90272	0	1.52338	8.27637	8.45861	0	0.973997	5.85211	10.0434
ZMYND10	147.451	126.336	124.094	146.821	147.875	133.22	133.682	134.983	199.408	233.765	200.362	467.815	349.361	364.579	229.779	351.579	57.6133	49.2921	37.0141	44.0063	68.5088	75.2036	76.7622	100.547	123.228	125.899	118.526	89.241	77.4732	30.114	111.968	137.388	136.748	120.262	112.984	100.656	34.1475
ABCB5	14.9206	0	7.5976	12.5132	5.02975	17.8326	30.2872	10.0734	13.7889	2.88599	2.45843	5.80415	14.0682	9.37823	3.53507	2.32834	2.25934	8.21534	13.5718	3.3851	2.97864	3.37994	6.80171	3.52795	3.0302	16.4574	17.3839	6.12438	8.11624	4.75484	13.7104	9.93164	11.983	3.7582	1.94799	2.34085	0
ARX	4.38842	0	1.68836	8.34211	34.2023	8.39181	5.22194	2.01468	20.153	8.65797	8.60451	2.32166	1.17235	3.51684	3.53507	2.32834	1.12967	6.57227	3.70141	1.12837	0	0	0	6.17392	7.07046	4.11434	2.37053	29.747	22.873	7.13226	1.52338	4.13818	0.704884	7.5164	1.94799	2.34085	0
SLC25A13	1028.64	1403.41	1300.03	1034.42	994.884	863.307	798.956	1079.87	846.425	891.771	1210.78	747.575	773.754	732.674	1041.08	924.349	1503.59	1252.02	1466.99	1491.7	1500.49	1364.65	1404.07	2595.69	2707.99	2671.03	2568.86	2799.72	2574.32	2216.55	2365.05	2556.57	2711.69	2623.22	2634.66	2503.53	1500.48
ST7	811.857	731.576	722.616	782.49	801.742	646.169	536.815	495.611	743.539	939.39	1012.87	633.813	619.003	642.409	692.873	695.008	1055.11	877.399	821.714	865.457	780.404	945.538	893.939	1222.44	1222.18	1226.9	1393.08	1354.36	1404.85	1671.33	1587.36	1300.22	1358.31	1471.96	1407.43	1345.99	1406.07
CDC27	1158.54	1137.03	1387.83	1032.75	1026.07	1150.73	1471.54	1644.98	986.435	972.579	1445.56	1393	1460.75	1364.53	1700.37	1678.73	1900.11	1186.3	1983.96	1764.77	1714.21	1631.67	1673.22	1254.19	1276.72	2272.76	1986.5	2018.42	1979.63	1552.45	1644.49	1932.53	1948.3	1290.32	1397.69	1340.13	1519.56
SLC4A1	10.5322	1337.79	30.3904	0.834211	0	1.04898	3.13316	18.1321	2.12137	5.77198	1.22922	6.96498	3.51706	5.86139	14.1403	54.7159	2.25934	6895.96	1.2338	0	8.19127	6.75988	133.119	5949.89	4377.62	5.76007	6.3214	2.62474	0.73784	3.96237	0.761689	3.31055	2.81954	3631.67	5626.78	7771.61	4.01735
CALCR	398.468	230.148	386.633	120.126	100.595	84.9671	54.3081	93.6825	65.7624	64.9348	105.713	52.2374	17.5853	51.5803	72.4689	40.7459	101.67	103.513	199.876	192.951	157.123	430.097	187.533	279.59	256.557	16.4574	18.9642	124.238	126.171	64.9828	210.226	22.3462	17.6221	103.977	210.383	173.223	7.03036
HCCS	346.685	945.074	536.897	369.556	255.511	348.26	421.932	634.623	331.994	327.56	591.253	575.772	488.872	519.319	767.11	952.289	545.632	1123.86	644.046	504.38	515.305	500.231	465.432	1250.66	1227.23	1041.75	776.742	841.665	768.092	724.32	648.959	797.014	878.286	1156.27	1138.6	1136.48	587.538
DVL2	1047.95	1087.08	997.818	1086.14	1167.91	1064.71	930.549	1142.32	1051.14	1064.93	1015.33	816.064	991.811	827.629	956.236	776.5	1023.48	1153.43	1259.71	1433.03	1153.48	1268.32	1163.09	1069.85	1039.36	1936.21	1747.87	1850.44	1732.45	1573.06	1794.54	1963.98	2046.28	999.681	1112.3	1107.22	1737.5
PRSS22	4.38842	1334.86	1.68836	2.50263	0	1.04898	4.17755	10.0734	1.06068	1.443	0	0	0	0	0	1.16417	0	507.708	2.46761	2.25673	0	0	0	153.466	168.681	8.22868	5.53123	3.49965	7.3784	14.2645	5.33182	4.13818	10.5733	171.625	194.799	191.949	4.01735
UPF1	4051.39	5457.93	4161.8	4629.04	4964.36	4150.8	3678.33	4433.3	5200.53	5214.99	5312.67	4916.12	4976.64	4760.62	4712.25	4619.42	4048.75	5724.45	4203.57	4133.21	3868.51	3917.35	3411.54	6658.13	6691.68	4382.59	4052.81	4124.34	4323.74	4300.75	4059.04	3794.71	3679.5	6942.65	7147.19	6472.44	4891.12
SKAP2	3658.18	2734.35	4269.85	3872.41	3864.86	3085.04	3006.79	4006.19	4384.86	4265.5	5814.19	4290.43	3440.86	3610.62	5138.22	3885.99	4907.3	2937.81	5364.58	5085.55	4470.94	4435.32	4072.28	3462.69	3470.58	4069.08	3971.42	4139.21	3930.47	4464	3675.15	4368.27	4463.33	3218.27	3202.5	3075.87	4866.02
SLC25A5	3329.05	14391.6	4754.41	2819.63	3010.81	2778.74	2476.24	4830.19	2690.95	3839.81	4746	4435.53	4206.41	3747.78	6647.7	6264.39	4810.14	16532.6	4974.7	4160.29	4915.51	3999.31	4392.93	23004.9	23998.1	7235.48	6196.56	6779.69	6394.86	6239.93	6013.54	5664.35	6303.08	23587.7	24015.8	24144.6	3827.53
CCDC109B	373.015	171.387	433.063	405.427	376.225	698.618	920.105	1162.47	542.009	549.781	668.694	989.028	873.404	814.734	1647.34	1513.42	491.407	193.882	852.559	630.757	475.094	450.377	502.355	124.36	131.308	827.805	623.448	776.922	827.119	884.4	414.359	671.213	785.946	86.4386	104.218	150.985	226.98
HOXA11	32.4743	44.0708	24.4812	24.1921	22.1309	20.9795	64.752	19.1394	26.5171	15.873	25.8135	6.96498	11.7235	14.0673	12.3727	26.7759	82.4661	144.59	38.2479	47.3914	46.169	63.3738	58.3004	63.5032	97.9763	419.663	564.975	444.455	363.755	240.912	457.014	566.931	508.222	121.515	112.984	95.9747	44.1909
POLR2J	1636	1094.92	1505.17	1675.93	1898.23	1490.6	1109.14	1102.03	2297.44	2747.46	2545.71	1902.6	1501.79	1716.22	1877.12	2033.8	2072.95	1523.12	1606.41	1726.4	1484.85	1729.68	1523.58	1599.93	1626.21	2812.56	3374.05	3087.56	2728.53	2683.31	3441.31	2863.62	2571.42	1631.06	1570.08	1624.55	1616.98
DHX33	373.015	874.561	405.205	437.127	429.54	463.647	493.995	539.934	443.366	541.123	448.664	564.164	545.145	528.698	523.19	438.891	850.643	1020.35	950.029	964.753	834.765	812.03	895.883	745.28	723.207	1202.21	1245.32	1300.12	1184.97	1076.18	1233.94	1136.35	1123.59	797.991	825.95	814.614	663.867
MEOX1	0	4.89676	3.37671	4.17106	7.04164	32.5183	38.6423	17.1248	7.42478	5.77198	6.14608	23.2166	14.0682	8.20595	15.9078	5.82084	2.25934	0	0	9.02693	32.7651	34.6444	32.0652	0.881988	0	6.58294	11.0625	5.24947	13.2811	14.2645	6.8552	19.8633	8.45861	13.7801	2.92199	1.17042	21.0911
THSD7A	1241.04	3158.41	1404.71	1560.81	1187.02	1033.24	919.061	503.669	1648.3	1109.66	988.29	764.987	702.24	729.157	438.348	296.863	1215.53	4580.88	666.254	696.202	753.597	697.957	823.007	2266.71	1984.78	458.337	730.122	603.689	682.502	735.415	662.67	671.213	623.118	2031.93	2495.38	2684.95	466.013
LIG3	932.977	507.304	834.892	886.767	766.533	751.067	797.912	882.429	696.869	852.811	1021.48	898.483	978.916	950.718	940.328	965.095	594.208	588.219	618.136	605.933	574.878	562.76	540.25	415.417	426.248	692.032	693.774	713.053	613.145	656.96	613.922	603.347	603.381	636.389	693.486	634.369	657.841
RPAP3	279.103	564.107	394.231	352.037	264.565	388.121	418.799	621.528	288.506	282.827	507.666	594.345	506.457	505.252	735.294	740.411	361.495	621.08	428.13	402.827	416.265	334.614	400.329	621.802	677.754	873.886	837.586	832.041	734.151	681.527	625.347	716.733	833.878	643.905	742.186	756.093	487.104
ACSM3	716.19	1472.94	620.471	686.556	635.76	453.158	472.063	304.216	511.249	627.703	969.852	430.668	377.498	420.848	489.607	389.996	614.542	1137	441.702	715.384	639.664	619.374	673.37	3071.08	3306.95	640.191	591.051	940.53	682.502	1265.58	804.344	585.139	523.024	3295.94	3246.33	3120.35	627.711
AC004381.6	165.004	142.985	124.938	148.49	123.732	177.277	202.611	153.116	114.554	121.212	120.463	162.516	195.783	199.287	205.034	162.984	85.8551	42.7198	70.3268	71.0871	89.3593	94.6383	119.516	43.2174	48.4831	389.216	402.199	348.215	258.982	346.311	299.344	331.055	360.196	57.6257	49.6739	56.1803	151.655
CIAPIN1	682.838	1860.77	726.837	807.516	826.89	645.12	734.204	1009.35	820.969	963.921	1012.87	2368.09	2100.86	1907.3	2386.17	2732.3	1152.27	1744.94	1239.97	999.733	974.761	864.419	935.721	1918.32	1970.64	1630.1	1502.12	1531.1	1530.28	1344.83	1306.3	1305.18	1423.87	1917.94	1962.6	1960.46	1168.04
SPPL2B	7965.85	3749.94	6815.89	6616.96	7341.42	6953.66	6112.8	4107.93	7020.66	6356.4	5490.91	4582.96	4474.88	5352.62	4113.05	4186.35	3199.23	2374.23	1901.29	2660.69	3578.84	4404.9	4000.38	2448.4	2323.15	3247.86	3797.58	3582.76	3730.52	3813.38	4493.97	3681.33	3668.92	2290	2060.98	2097.4	4033.42
FAM214B	688.981	971.517	549.56	666.535	683.04	748.969	807.311	1272.27	721.265	691.195	649.026	864.819	973.054	931.962	873.162	980.229	1182.77	851.11	978.407	798.884	1347.84	1259.03	1303.99	919.914	991.884	808.879	690.613	566.943	543.05	484.201	498.906	767.219	776.078	914.496	922.375	929.316	1040.49
COPZ2	817.123	559.21	868.659	935.151	1173.94	1097.23	1466.32	616.491	1429.8	1468.97	1218.15	1113.24	1087.94	995.265	1079.96	1373.72	502.704	665.443	719.308	426.523	309.779	518.821	543.165	663.255	682.804	483.023	391.927	587.066	712.016	824.172	525.566	533.826	482.141	711.553	708.096	676.504	390.687
PRKAR2B	165.882	360.401	114.808	263.611	148.88	125.877	101.306	261.908	112.432	196.247	398.266	188.055	203.99	240.317	235.082	221.192	204.471	1137	278.84	217.775	127.337	107.313	126.318	635.032	625.23	373.582	431.436	269.473	253.079	187.024	251.357	277.258	253.053	736.607	734.394	876.647	107.464
MSL3	965.452	774.667	911.712	915.13	947.604	1184.29	1302.35	2008.63	899.459	812.407	628.13	910.091	1325.93	1023.4	1028.7	1025.63	1026.87	767.313	958.666	795.498	1055.93	984.407	1102.85	680.013	674.724	915.852	830.474	665.808	852.943	748.887	692.376	960.886	969.921	658.938	590.242	709.276	787.401
CREBBP	4916.78	2616.83	5298.9	5345.63	5307.39	4951.17	4667.37	4069.65	5607.83	5251.06	6597.2	3707.69	3588.58	3758.33	3368.92	2807.97	3382.24	2448.17	3669.33	3090.6	3210.98	3308.96	3184.17	2907.92	2759.5	3110.44	2892.04	2954.58	3237.64	3555.83	3139.68	3218.68	2985.89	3010.32	3243.41	2848.81	4037.44
BZRAP1	836.432	1951.85	526.767	529.724	746.414	687.079	649.609	1300.47	728.689	388.166	222.488	1002.96	1166.49	1307.09	675.198	565.786	410.071	1140.29	328.192	572.082	913.699	1295.36	1065.93	1052.21	975.723	846.731	1152.87	1002.65	911.97	1619.81	1534.04	1021.3	1185.62	1049.79	1123.02	1056.89	564.438
MPO	7.02147	2.93805	5.90924	9.17632	17.1011	8.39181	11.4883	69.5064	10.6068	11.544	2.45843	23.2166	42.2047	43.3743	35.3507	33.7609	1.12967	0	4.93522	1.12837	0.744661	5.06991	6.80171	4.40994	7.07046	44.4349	21.3347	16.6233	23.6109	6.33978	9.14027	28.1397	35.9491	1.25273	0.973997	2.34085	2.00868
PON1	0.877683	5.87611	2.53253	1.66842	4.0238	4.1959	4.17755	6.04403	0	1.443	1.22922	2.32166	4.68942	0	1.76753	1.16417	12.4264	1.64307	0	3.3851	1.48932	1.68997	5.83004	2.64597	1.01007	5.76007	9.4821	8.74912	6.64056	12.6796	6.09351	25.6567	14.0977	1.25273	4.86999	1.17042	0
GCFC2	638.076	1097.85	672.81	622.322	686.057	565.398	584.857	533.89	761.571	734.485	727.696	630.331	585.005	654.132	505.515	519.219	1267.49	1514.91	1078.34	1225.41	1022.42	1164.39	1141.72	849.355	861.586	757.038	692.984	742.8	751.859	856.663	810.437	718.389	732.375	997.176	1017.83	1019.44	944.077
WDR54	1989.71	592.508	1698.49	2171.45	2337.83	1839.9	1600	930.781	2391.84	2340.54	2439.99	1431.3	1112.56	1259.03	1746.32	1532.05	720.731	662.157	1237.51	1130.62	940.507	724.152	775.395	646.498	592.908	905.154	876.305	731.426	703.162	797.228	615.445	783.772	772.553	681.487	670.11	620.324	1471.35
CROT	428.309	1550.31	549.56	430.453	409.421	508.753	435.509	406.965	422.152	447.329	618.296	467.815	460.735	492.357	424.208	520.383	747.843	1348.96	766.192	795.498	773.703	805.27	775.395	1299.17	1460.55	404.851	474.105	497.825	471.48	607.827	457.775	682.8	687.262	1424.36	1503.85	1361.2	557.407
ABCB4	500.279	38.1947	404.361	327.845	387.29	439.521	411.489	213.556	400.938	261.182	373.682	221.719	178.198	220.388	245.687	358.564	50.8352	21.3599	19.7409	20.3106	29.7864	40.5593	36.9236	52.9193	58.5838	27.1546	30.0267	41.9958	54.6002	57.0581	38.8462	27.312	28.1954	28.8129	35.0639	24.5789	23.0998
KMT2E	4540.26	7313.8	3719.45	4547.29	4833.59	3911.63	4189.04	4201.61	5626.92	4845.58	4439.93	4956.75	4166.55	4664.5	3102.02	3230.57	7447.93	6015.27	6619.36	6707.01	5491.13	5953.76	5616.27	2988.18	2857.47	4058.38	5189.08	4810.27	4784.89	4758.8	5702.77	4901.27	3955.81	3126.82	3252.18	3312.3	5700.62
RHBDD2	2169.63	4508.93	2232.01	2513.48	2983.65	2328.73	1706.53	1928.05	3325.24	3691.18	3419.68	2590.97	2345.88	2198.02	2568.23	2835.91	2837.74	4942.35	2377.54	2357.16	2416.42	2365.11	2165.86	5528.3	5412.94	6053.84	5480.66	5546.94	5240.14	5074.2	5931.27	5540.2	5261.96	4889.42	4874.86	4817.46	1993.61
SOX8	8.77683	78.3481	4.22089	9.17632	5.02975	19.9305	13.577	28.2055	2.12137	1.443	7.3753	9.28664	5.86177	9.37823	3.53507	2.32834	27.1121	27.9322	23.4423	20.3106	22.3398	42.2492	43.7253	11.4658	13.1308	1.64574	5.53123	14.8735	19.9217	11.8871	8.37858	4.13818	2.81954	23.8019	9.73997	24.5789	36.1562
IBTK	1580.71	1742.27	1973.69	1700.96	1655.79	1513.67	1652.22	1939.13	1592.09	1754.68	2495.31	1810.9	1692.88	1822.89	1986.71	2053.59	1827.81	1889.53	2083.9	2040.09	1845.27	1734.75	1714.03	2608.92	2794.85	3707.84	3391.43	3369.29	2853.23	2516.1	2685.72	3497.59	3675.27	2199.8	2260.65	2391.17	1527.6
ZNF195	1346.37	895.127	1271.33	998.551	1082.4	1235.69	977.546	926.752	987.496	829.723	784.24	884.553	1005.88	1282.47	904.978	784.649	544.502	543.856	535.471	573.21	598.707	583.039	711.265	771.74	838.354	772.673	893.688	724.427	802.032	749.68	870.611	852.466	857.844	657.685	605.826	671.823	1018.4
MYCBP2	2824.38	2906.72	2695.46	2453.42	2500.79	2654.96	2421.93	3683.84	2741.87	2533.9	2283.88	3123.79	2570.97	2562.6	2699.02	3130.45	2570	3179.34	2735.34	2829.94	2473.76	2393.84	2375.74	2451.93	2308	1951.84	2220.39	2837.34	3116.64	2902.04	2692.57	2180.82	1819.31	2306.28	2474.93	2343.19	2385.3
FBXL3	1033.91	1979.27	1458.74	1181.24	986.836	962.96	963.969	1293.42	854.911	800.863	1715.99	831.155	852.301	722.124	1049.92	1076.86	2633.27	2686.42	3314	2636.99	2636.1	2302.58	2312.58	3143.41	3499.88	1447.42	1307.74	1480.35	1517	1630.12	1220.23	1435.95	1347.03	3105.53	3326.2	3376.67	3124.49
ITGAL	500.279	103.811	477.805	817.527	927.485	1470.66	1269.97	3347.39	1009.77	790.762	575.273	2737.24	2492.42	1807.65	1861.21	1491.3	661.988	118.301	518.198	338.51	994.122	681.903	962.928	104.075	141.409	1174.23	1555.07	1117.26	1764.91	1573.06	1520.33	1455.81	1444.31	97.7132	94.4777	113.531	1021.41
PDK2	755.685	963.682	811.255	774.982	753.456	612.602	549.348	465.391	674.595	851.368	1150.55	632.653	568.592	579.106	592.124	565.786	615.671	1081.14	539.172	609.318	646.366	588.109	473.205	3383.31	3509.98	627.848	516.775	656.184	717.181	1237.05	726.652	613.279	649.903	4102.7	3945.66	4005.19	2538.97
ITGA3	29419.9	9795.48	33422.7	24404.9	25624.5	27162.2	20339.4	10594.2	31559.6	31113.9	32432.9	22414.5	17314.5	17143.4	21954.5	29948.2	14737.7	19271.6	29325.1	27751	18846.6	12537.9	11297.6	9722.16	8282.54	24456.5	28780.6	27567.6	23439	16590.4	23851.5	22568	23061	10505.4	11193.2	11188.1	8324.96
ZFX	774.994	785.44	824.762	695.732	644.813	770.998	989.035	1201.76	610.954	520.921	705.57	805.616	807.752	658.821	784.785	734.59	870.977	795.245	909.314	798.884	839.233	830.62	847.299	844.945	847.445	679.689	655.846	698.18	679.551	665.677	639.819	732.459	766.914	818.035	830.819	924.634	820.544
LAMP2	5303.84	4220.03	8154.76	6747.1	5518.64	4969	4911.75	7524.82	6249.55	6699.83	12690.4	6505.29	6042.31	5189.68	8381.65	8287.71	6581.47	5484.56	8441.69	6901.09	6586.52	5400.3	5412.22	8982.17	9270.38	12328.2	9618.81	10217.2	9574.95	11929.1	9038.97	11946.1	13792.5	7864.66	7787.11	7497.73	8077.89
GGNBP2	5099.34	4660.73	4646.35	4405.47	4869.8	4105.69	4041.78	3672.76	4690.34	5109.65	4053.96	4961.39	4364.67	5047.83	3943.37	4659	3957.24	4559.52	4185.06	4154.65	3581.07	3860.73	3863.37	3788.14	3718.05	3024.04	3396.96	3266.92	3434.65	3425.07	3381.9	3164.06	2995.76	3760.71	3814.17	3965.39	4939.33
ITGA2B	32.4743	78.3481	24.4812	44.2132	49.2915	72.3794	103.394	35.2569	47.7307	34.6319	11.0629	62.6848	82.0648	109.022	40.6533	45.4026	31.6308	65.7227	29.6113	85.7559	65.5301	78.5836	74.8188	44.9814	25.2516	65.0065	78.2274	39.371	40.5812	37.2462	70.8371	91.0401	85.291	16.2855	35.0639	25.7493	36.1562
ASB4	778.505	18.6077	1573.55	926.809	797.718	662.953	474.152	243.776	732.932	776.332	1144.4	240.292	369.292	72.6813	235.082	73.3426	7.90771	6.57227	2.46761	7.89857	2.23398	9.29483	1.94335	34.3975	29.2919	5.76007	3.95088	7.87421	5.16488	2.37742	0.761689	5.79346	5.63907	6.26367	10.714	9.36338	6.02603
GDE1	2414.51	2109.52	3132.74	3334.34	3654.61	2935.04	2259.01	2846.74	3859.83	4219.32	5653.17	3477.85	2794.89	2926.01	3865.6	3192.15	1661.75	2494.18	1486.73	1389.02	1377.62	1142.42	1450.71	3116.95	3078.68	3624.73	3624.53	7058.79	6171.3	3545.52	3803.11	3305.58	3305.2	2519.25	2823.62	2886.26	844.648
C19orf60	2713.8	2161.43	2607.67	3194.19	3704.91	3618.97	3030.81	3026.05	4394.41	4412.68	3418.45	3234.07	3895.73	3655.17	3929.23	3977.96	1736.31	2719.28	1701.42	1924.99	2327.06	2453.84	2418.49	2223.49	2369.61	2557.47	2539.62	2538.99	2722.63	2829.92	2594.31	2399.32	2121.7	2553.07	2407.72	2421.6	2293.91
CRLF1	1.75537	109.687	1.68836	4.17106	2.0119	11.5387	123.238	54.3963	3.18205	4.32899	4.91687	5.80415	42.2047	12.8951	3.53507	9.31334	124.264	1.64307	46.8846	90.2693	48.4029	194.346	148.666	14.1118	30.302	13.1659	19.7544	17.4982	13.2811	15.8495	22.089	11.5869	14.0977	33.8238	6.81798	14.0451	75.3253
OSBPL7	1066.39	664	937.037	1047.77	1191.04	1262.97	1109.14	1064.76	1238.88	919.188	476.936	659.352	962.503	842.868	549.703	621.666	316.308	432.127	177.668	238.085	472.115	584.729	599.522	321.926	306.05	697.792	913.443	786.546	737.84	743.34	948.303	722.527	783.127	343.249	346.743	324.207	398.722
TMEM98	2532.99	759.977	2368.76	3413.59	3680.77	2250.05	1451.7	1243.06	3382.52	5161.6	4947.6	3550.98	2882.82	2929.52	2499.29	2500.63	1778.1	1817.23	1392.96	1521.04	1723.15	1658.7	1377.83	1893.63	1825.19	1689.35	3180.46	2336.89	2132.36	3971.08	3435.98	2308.28	2718.74	1835.25	1773.65	1843.42	929.012
YBX2	1163.81	205.664	1183.54	1420.66	1423.42	1053.17	584.857	294.143	1252.67	1324.67	700.653	44.1116	44.5495	73.8536	107.82	19.7909	422.497	98.5841	134.485	264.038	507.114	727.532	535.392	121.714	89.8958	103.681	83.7586	48.9951	33.9406	19.8118	130.249	75.315	69.7836	82.6804	86.6857	93.6338	99.4294
KRT33A	11.4099	0	8.44178	20.8553	21.1249	5.24488	0	7.05137	54.0948	4.32899	18.4382	0	2.34471	3.51684	1.76753	0	0	0	0	0	0	0	0	0	0	4.93721	0	0.874912	0	0	0	0	0.704884	1.25273	0	0	2.00868
MAP3K14	2680.44	1167.39	2447.27	2736.21	2867.96	1916.48	1261.62	1975.39	2427.9	3844.14	3538.91	1689.01	1980.11	1899.09	1983.17	1484.31	1042.69	622.723	1647.13	1831.34	1722.4	1148.33	1026.09	473.628	507.053	1612.82	1666.48	1498.72	1497.82	1466.08	1331.43	1422.71	1358.31	388.347	341.873	388.58	1465.33
ABCC8	4.38842	22.5251	5.90924	6.67369	6.0357	2.09795	1.04439	1.00734	4.24273	4.32899	0	2.32166	1.17235	3.51684	1.76753	2.32834	2.25934	14.7876	0	3.3851	12.6592	10.9848	21.3768	22.9317	5.05033	10.6973	4.74105	13.9986	5.16488	0.792473	2.28507	6.62109	4.93419	5.01093	1.94799	4.68169	26.1128
CCL18	43.8842	0	248.188	32.5342	38.2261	188.816	126.371	2854.8	146.374	171.716	65.1485	320.389	810.097	77.3704	979.214	3034.99	168.321	6.57227	1383.09	256.139	349.991	122.523	790.942	1.76398	3.0302	3051.19	1306.95	544.195	687.667	229.025	322.195	8382.31	4680.43	2.50547	2.92199	1.17042	106.46
CCL3	122.876	0	27.0137	10.0105	12.0714	9.44079	25.0653	229.673	22.2743	12.987	11.0629	45.2724	37.5153	87.9209	60.0962	19.7909	9.03738	8.21534	17.2733	9.02693	19.3612	16.0547	23.3202	5.29193	13.1308	76.5267	97.9818	70.8679	73.784	69.7376	52.5566	61.2451	63.4396	1.25273	2.92199	4.68169	8.0347
SYNRG	2760.31	2515.95	2690.39	2698.67	2893.11	2755.66	2651.7	3408.83	2800.2	2613.27	2669.86	2747.69	2634.28	2630.59	2350.82	2096.67	2390.39	2702.85	2085.13	2222.88	2346.43	2389.62	2451.53	2925.56	2646.37	2284.28	2244.1	2273.9	2310.92	2394.06	2179.95	2253.66	2241.53	2305.03	2397.01	2511.73	1992.61
CACNG3	0	0.979352	0	0	0	0	0	0	1.06068	0	0	0	4.68942	0	3.53507	0	0	0	0	0	0	0	0	0	0	0	2.37053	0	0	0	0.761689	2.48291	2.11465	0	0	0	0
TMEM132A	704.78	723.741	568.132	1344.75	1234.3	2220.68	2703.92	1485.82	1350.25	1200.57	1921.27	3282.83	2748	3118.26	6060.87	9117.76	1718.23	510.994	2384.94	1445.44	2035.16	1557.31	1942.37	300.758	314.13	10234	13264.7	14728.3	12850.2	10771.3	13462.9	9465.68	7625.44	487.313	408.105	356.979	1109.79
AP2B1	4699.12	7806.41	5520.08	5469.92	5076.02	4475.98	4643.34	4885.59	5653.44	6386.7	7599.02	6006.14	5117.33	4950.53	6002.55	5191.02	5484.56	9447.64	6107.33	5751.28	5702.61	4566.3	4971.08	8916.9	8824.94	6412.61	5173.28	5867.16	5862.14	6296.2	5210.72	4331.02	4746.69	9874.05	10377	10221.3	6989.19
TAC1	0.877683	58.7611	0	0	0	0	5.22194	2.01468	0	0	0	1.16083	0	1.17228	0	0	0	59.1505	0	0	0	0	0	77.615	68.6844	0	0.790175	0	0	0	0	0	0	13.7801	9.73997	4.68169	0
ZNF263	1851.03	1347.59	1917.97	1992.93	2159.77	1933.26	1903.92	1590.59	2288.95	2197.68	2567.83	1569.44	1418.55	1430.18	1661.48	1596.07	1330.75	1344.03	1544.72	1563.92	1361.24	1207.48	1287.47	1151.88	1191.88	1186.58	1040.66	992.15	976.9	1032.59	1040.47	1218.28	1147.55	1221.42	1223.34	1221.92	1590.87
CX3CL1	2552.3	3227.94	2375.52	3205.04	2504.81	2326.63	2466.84	1172.54	3710.27	3034.62	3881.87	4968.35	3840.63	4452.31	4979.14	4539.09	7042.38	4764.9	4213.44	4414.17	6607.37	6822.41	5598.78	2997.88	3193.83	2159.2	1717.05	1399.86	1451.33	2524.03	2096.93	1296.91	1158.13	3988.7	3952.48	4074.24	14767.8
SPATA20	3781.94	2293.64	3564.12	3649.67	4609.26	5210.26	4594.26	2419.63	5020.21	4538.22	3199.65	3920.12	4574.53	4272.96	3835.55	3847.58	2133.95	2540.18	1892.66	2172.11	2410.47	2938.01	2860.61	3826.95	3737.24	8431.1	9395.19	9172.58	8735.29	8761.58	10110.7	8005.73	8123.09	2932.65	2849.92	2915.52	4481.35
CACNA1G	4.38842	3.91741	2.53253	4.17106	2.0119	7.34283	7.31071	32.2348	3.18205	2.88599	0	2.32166	5.86177	2.34456	17.6753	22.1192	2.25934	0	1.2338	4.51347	2.97864	4.22492	0.971673	0.881988	0	40.3205	15.0133	20.123	15.4946	7.13226	13.7104	14.8975	11.2781	5.01093	0.973997	2.34085	5.02169
TNFRSF12A	8883.03	10546.6	10568.3	10255.8	11261.6	10353.4	8708.1	4552.16	12069.5	15168.8	12807.2	9742.85	8459.71	7194.27	9500.5	16606.9	2853.55	3931.86	3199.25	3033.05	2849.82	2211.32	1670.31	1508.2	1832.26	6362.41	5154.31	3794.49	3264.2	2421.8	4045.33	4766.36	5534.05	477.292	481.155	411.989	1664.19
DLX6	9.65452	0	7.5976	7.5079	6.0357	4.1959	15.6658	5.03669	7.42478	8.65797	11.0629	0	0	2.34456	0	0	28.2418	3.28614	20.9747	18.0539	24.5738	35.4894	48.5837	0.881988	0	9.87441	3.1607	14.8735	3.6892	1.58495	6.09351	7.44873	2.11465	0	0	0	17.0737
MAP3K9	133.408	699.257	102.146	96.7685	213.261	146.857	201.567	111.815	106.068	115.44	98.3373	196.18	165.302	134.812	111.355	138.536	25.9825	537.283	33.3127	53.0332	37.233	53.234	57.3287	426.882	408.066	123.43	158.035	168.858	149.782	210.005	240.694	143.181	135.338	448.479	475.311	392.092	35.1518
RALA	1106.76	1149.76	1105.03	1096.99	1004.94	1017.51	1092.43	1941.14	1349.19	1158.73	1550.04	1683.2	1505.3	1378.6	2032.66	2441.26	2253.7	1853.38	2125.84	1676.75	1637.51	1541.25	1628.52	1554.95	1533.28	2299.09	1758.93	1873.19	1660.14	1596.83	1483.01	1614.72	1482.37	1657.37	1654.82	1794.26	2065.92
BAIAP2L1	1374.45	962.703	1360.81	1662.58	2087.34	1604.93	1340.99	856.238	2275.17	2235.2	2217.51	1259.5	1341.17	1321.16	1387.51	1279.42	255.306	823.177	322.023	327.226	343.289	290.675	211.825	581.23	532.304	1408.75	1313.27	1325.49	1156.2	687.867	1294.87	1202.56	1181.39	521.137	634.072	651.925	160.694
KDM7A	874.173	939.198	964.895	1043.6	948.61	932.54	1142.56	2533.46	920.673	786.433	854.305	1047.07	935.539	1137.11	1253.18	927.842	1100.3	726.236	2302.28	2066.04	1161.67	957.368	925.033	736.46	746.438	688.74	550.752	590.566	582.894	647.45	527.089	698.525	785.241	694.014	724.654	661.289	706.049
ETV1	147.451	132.212	130.003	135.976	126.75	265.391	430.287	248.813	88.0367	124.098	192.987	441.116	314.191	273.141	212.104	224.684	946.665	179.094	1452.19	1053.89	975.506	908.358	938.636	328.1	288.879	2035.77	2207.75	1998.3	1990.69	2100.85	2004.77	2420.01	2061.08	172.877	214.279	263.345	188.815
AGK	1576.32	1153.68	1414	1211.27	1402.29	1170.66	1067.36	1334.72	1161.45	1064.93	805.137	792.847	838.233	944.857	839.579	869.633	1119.51	888.9	635.409	775.188	1014.23	1300.43	1291.35	1254.19	1257.53	1677	1856.91	1615.09	1353.2	1486.68	1755.69	1786.87	2026.54	1112.43	1130.81	1081.47	1137.91
ALDH3B1	4728.96	933.322	4630.32	4829.25	4884.89	3788.9	3526.9	3203.34	5272.66	6171.69	5404.86	4277.66	3756.22	3861.49	3883.27	4032.68	1465.18	1307.88	2706.97	2246.58	1595.06	1330.01	1232.08	2959.07	2698.89	4466.53	3875.81	4101.59	3549.75	3897.38	4450.55	4082.73	3916.34	3587.83	3288.21	3093.43	1064.6
TTC22	983.883	483.8	1131.2	1183.75	1290.63	1051.07	814.622	608.433	1373.58	1457.43	1550.04	978.58	940.228	862.797	947.398	956.946	215.767	353.26	166.564	227.93	216.696	240.821	227.372	1373.26	1236.32	425.423	500.181	384.086	386.628	670.432	687.044	567.759	613.954	968.363	874.649	827.489	1410.09
PHTF2	697.758	733.534	601.055	661.53	613.629	868.552	970.236	1757.81	587.618	666.664	656.402	1080.73	1089.12	1067.95	1088.8	1166.5	1259.58	1227.37	1130.16	1226.53	1252.52	1276.77	1310.79	690.597	629.271	986.618	896.849	1042.02	1037.4	1041.31	923.929	1017.17	1037.59	583.774	588.294	644.903	726.136
CCL26	5.2661	5.87611	0.844178	4.17106	1.00595	12.5877	17.7546	13.0954	1.06068	0	0	4.64332	7.03412	3.51684	7.07014	19.7909	13.5561	0	13.5718	2.25673	9.68059	17.7447	13.6034	7.05591	7.07046	23.0403	15.0133	5.24947	10.3298	8.7172	8.37858	12.4146	14.0977	5.01093	3.89599	3.51127	6.02603
FARP2	1057.61	1424.96	1040.87	1047.77	1084.41	825.544	869.974	1080.87	827.333	1037.51	971.081	963.489	1002.36	1017.54	876.697	796.291	759.14	1058.14	666.254	749.235	767.745	742.741	720.01	1135.12	1151.47	1088.65	971.126	984.276	949.6	620.506	883.56	786.255	828.944	1061.07	1122.04	1108.39	805.479
USH1C	5488.15	1786.34	5789.37	5588.38	5935.1	4328.08	3118.54	2153.69	5582.38	7354.95	7747.75	4192.92	3837.11	3869.69	3842.62	3755.61	4492.71	1779.44	1605.18	2571.55	4676.47	5221.16	4303.54	5276.05	4991.74	3948.94	3620.58	3975.6	3268.63	3217.44	4014.1	4607.45	4302.61	6269.93	5656	5709.32	8708.61
GGCT	723.211	1704.07	823.918	659.861	645.819	674.492	695.562	801.842	648.077	793.648	964.935	823.029	842.923	764.326	1159.5	969.752	1265.23	1744.94	1917.33	1524.42	1149.76	1098.48	1036.78	2032.1	2089.83	2201.99	1951.73	1886.31	1694.08	1578.61	1702.38	1911.01	1934.2	1725.01	1790.21	2001.42	681.945
DBF4	208.011	183.139	203.447	182.692	227.345	269.587	298.695	297.165	189.862	177.488	164.715	275.117	274.331	216.872	305.783	323.639	244.009	73.9381	292.412	250.497	255.419	198.571	261.38	119.95	111.107	789.953	937.148	895.91	770.305	447.747	763.213	808.601	840.927	117.757	95.4517	122.894	163.707
TBXA2R	102.689	285.971	82.7294	107.613	59.351	93.3589	193.212	69.5064	107.129	33.1889	140.131	71.9715	57.4453	83.2318	30.0481	53.5517	675.544	933.263	408.389	252.754	458.711	541.635	627.701	402.187	412.107	145.648	157.245	142.611	202.168	143.438	143.959	208.564	156.484	476.039	496.739	505.623	745.219
IFRD1	2154.71	2117.36	2071.61	1420.66	1369.1	1422.41	1864.23	3042.16	1178.42	1223.66	1042.38	958.846	1206.35	1315.3	1410.49	1661.27	1325.11	1077.85	1547.19	1603.41	1516.13	1560.69	1599.37	701.181	723.207	1147.08	1318.01	1273	1161.36	1268.75	1168.43	1055.24	1322.36	710.3	743.16	790.035	1316.69
LGALS14	0	0	0	0	0	0	0	0	0	0	0	0	0	0	0	0	0	3.28614	0	2.25673	1.48932	0	1.94335	0	0	0	1.58035	0.874912	0.73784	1.58495	3.80845	0	0	0	0	0	1.00434
COX10	149.206	595.446	211.889	189.366	210.243	225.53	197.389	251.835	214.258	196.247	261.823	241.453	252.056	211.01	263.363	323.639	403.293	596.434	409.623	442.32	434.137	370.103	383.811	899.628	958.552	812.993	766.47	901.159	771.781	649.035	805.106	729.976	754.931	903.221	903.869	821.637	469.026
GTF2IRD1	1701.83	1632.58	1598.87	1410.65	1350.99	1406.68	1452.74	836.091	1406.47	1421.35	1242.74	1035.46	975.399	964.785	811.298	1066.38	1240.38	1153.43	1840.84	2086.35	1501.24	1356.2	1359.37	924.324	860.576	1874.49	1730.48	2101.54	1732.45	1960.58	2296.49	1996.26	2263.38	1155.02	1154.19	1070.94	835.609
PAF1	2128.38	3601.08	2055.57	1972.91	2111.49	1937.46	1949.87	1803.14	2094.85	2264.06	2719.03	1903.76	1929.69	1889.71	2474.55	2334.16	2530.47	4012.37	2801.97	2898.77	2427.59	2448.77	2270.8	3455.63	3329.18	4041.1	3944.56	4049.97	3928.26	4257.96	4154.25	3918.86	3552.62	3403.68	3320.36	3231.54	3525.23
VPS41	1932.66	2277.97	2297.85	2129.74	2048.11	1736.06	2002.09	2621.1	1960.14	2204.9	2703.05	2119.68	1889.83	1994.05	2432.13	2007.03	2454.78	1993.04	3315.23	2867.18	2627.91	2272.16	2500.12	2781.79	3003.93	2945.87	2952.89	3409.53	3295.93	3171.48	2980.49	3016.74	3257.98	2802.37	2887.9	2633.45	2139.24
ARHGAP44	243.118	626.785	177.277	313.663	298.767	351.407	445.953	111.815	230.168	217.892	335.576	195.02	247.367	257.901	190.894	494.771	700.397	487.991	310.919	354.307	542.113	731.757	650.049	442.758	424.227	134.127	286.834	300.095	250.866	225.855	397.602	153.94	145.911	477.292	574.658	456.465	294.271
ELAC2	1210.33	2145.76	1196.2	1287.19	1346.97	1362.62	1374.41	1616.78	1416.01	1493.5	1459.08	1423.18	1674.12	1515.76	1558.97	1657.78	2327.12	2387.38	2220.85	2233.04	2191.54	2213.86	2174.6	3010.23	3200.9	4477.22	4557.73	4518.05	4204.21	3801.49	4588.42	3877.48	3740.12	3034.12	3006.73	2952.98	2134.22
SCIN	371.26	10634.8	279.423	639.006	858.075	716.451	816.711	1002.3	991.739	587.299	771.948	884.553	576.798	867.486	827.206	313.161	735.417	14077.8	1553.36	815.809	285.95	163.927	445.998	5717.05	5834.14	6224.99	7860.66	10250.5	9244.4	11944.2	9220.25	7186.37	7730.47	5271.5	6186.83	6801.33	88.3817
ARSD	1566.66	5431.48	1721.28	1804.4	1808.7	1460.17	1242.82	1267.23	2086.36	2292.92	2469.5	1432.46	1270.83	1339.91	1451.15	1480.82	2328.25	5295.61	2167.79	2115.69	2056.75	2007.68	1800.51	5643.84	5955.35	2358.34	2684.23	2811.09	2689.43	3849.04	3035.33	2728.72	2717.33	4088.92	4347.92	4204.16	2328.05
PNPLA4	546.797	890.231	812.099	568.932	538.183	410.15	414.622	445.244	583.376	636.361	1041.15	631.492	525.215	554.488	760.04	705.486	447.35	1140.29	486.119	525.819	530.943	467.276	362.434	1727.82	1861.55	635.254	611.596	761.173	728.986	941.458	666.478	442.786	423.636	1647.34	1780.47	1852.78	753.253
MYH13	0	0	3.37671	0.834211	0	3.14693	4.17755	0	3.18205	4.32899	0	1.16083	9.37883	1.17228	0	6.98501	56.4836	0	12.338	6.7702	6.70195	18.5897	37.8953	0	0	0.822868	0	1.74982	0.73784	0.792473	0.761689	1.65527	0.704884	2.50547	1.94799	1.17042	0
ADIPOR2	2926.2	2609.97	3532.88	3778.14	3294.48	2707.41	2472.06	2756.08	3589.35	4080.79	5173.77	3382.66	2974.26	3179.22	3946.9	3982.62	3062.54	3506.31	2648.98	2430.5	2767.16	2398.07	2525.38	3415.06	3472.6	2708.06	2363.41	2408.63	2387.65	2661.92	2318.58	2069.09	1963.81	3139.35	3393.41	3604.9	3585.49
CDKL3	119.365	78.3481	98.7688	65.0685	66.3926	65.0365	53.2637	46.3376	58.3376	79.3648	28.272	32.5033	39.86	36.3406	17.6753	23.2834	59.8726	24.646	60.4564	62.0602	72.2321	70.9787	84.5356	20.2857	28.2818	32.9147	33.1874	26.2474	29.5136	22.9817	25.1357	31.4502	26.7856	22.5492	14.61	19.8972	47.2039
UPP2	409.878	568.024	408.582	230.242	182.077	196.159	106.527	277.018	110.311	227.993	143.818	481.745	582.66	696.334	212.104	351.579	39.5385	662.157	40.7155	32.7226	46.9136	49.0091	74.8188	5932.25	5372.54	21.3946	40.2989	34.1216	33.2028	29.3215	17.5189	19.0356	23.9661	2523.01	2658.04	2773.9	23.0998
PRSS21	0.877683	3.91741	0.844178	5.00527	7.04164	7.34283	10.4439	11.0807	2.12137	12.987	0	25.5383	15.2406	2.34456	17.6753	9.31334	0	0	3.70141	1.12837	3.7233	0	2.91502	2.64597	5.05033	562.019	610.806	512.698	398.434	453.295	587.262	597.554	618.184	0	0.973997	0	2.00868
MARK4	1872.98	1202.64	1923.88	2280.73	2455.52	1765.43	1586.42	1506.98	2444.87	2571.42	3327.49	1987.34	1854.66	1979.98	1746.32	1683.39	1691.12	1482.05	1777.91	1606.79	1678.47	1723.77	1547.88	1431.47	1447.42	3672.46	3268.96	3404.28	3467.11	3725.42	4046.85	3531.53	3539.22	1702.46	1679.17	1561.34	1938.37
PROM1	3079.79	4232.76	2686.17	3566.25	3347.8	1047.93	512.794	1023.46	4418.81	2562.76	4090.83	70.8107	33.9983	38.6852	570.914	136.208	192.044	1846.81	639.111	741.337	68.5088	99.7082	56.3571	958.721	1106.02	18.1031	8.69193	10.4989	23.6109	191.778	13.7104	19.0356	9.86838	1376.75	1421.06	1101.37	10.0434
CCDC124	3789.84	3034.03	3849.45	4426.32	4717.9	3496.24	2946.22	2708.73	5190.98	6190.45	6599.66	4283.46	4045.79	4330.4	5564.2	5565.89	3087.39	3981.16	3260.94	2932.62	2621.21	2785.07	2549.67	3460.04	3628.15	4463.23	4872.22	4521.55	4435.89	4194.56	4919.75	3947.83	3755.62	3823.34	3903.78	3865.91	4328.7
CEACAM21	87.7683	13.7109	57.4041	99.2711	122.726	134.269	154.569	295.15	118.797	124.098	121.692	234.488	225.092	208.666	194.429	172.297	109.578	4.92921	130.783	55.29	101.274	66.7538	106.884	38.8075	44.4429	198.311	195.173	145.235	185.198	157.702	129.487	143.181	115.601	8.76914	10.714	4.68169	36.1562
PAFAH1B1	2380.28	3616.75	2779.03	2576.88	2357.94	2429.43	3044.39	3635.49	2168.04	2233.76	3033.71	2476.05	2634.28	2410.21	3132.07	2962.81	3756.16	4493.79	4393.58	4290.05	3971.28	3507.53	3604.91	5450.69	5357.39	4575.97	4165.8	4373.69	4238.89	3898.97	3812.25	4206.05	4185.6	5329.13	5567.37	5694.11	3665.83
NOS2	23.6974	32.3186	14.351	37.5395	32.1904	22.0285	46.9974	39.2862	45.6094	25.9739	27.0428	23.2166	25.7918	19.9287	14.1403	26.7759	126.523	198.811	209.747	83.4991	78.1894	166.462	198.221	133.18	116.158	17.2802	37.1382	42.8707	98.8706	53.8882	32.7526	23.1738	19.7368	61.3839	72.0758	83.1	146.633
DNAH9	28.9635	134.171	24.4812	10.0105	8.04759	32.5183	55.3525	22.1615	19.0923	10.101	20.8967	8.12581	12.8959	21.101	12.3727	18.6267	31.6308	131.445	53.0536	41.7496	54.3602	46.4742	57.3287	87.3169	82.8254	163.751	124.848	170.608	140.19	199.703	118.062	133.25	105.028	110.241	103.244	126.406	32.1388
KIAA0100	3386.98	2608.01	3727.04	3592.11	3362.89	2987.48	2401.05	3873.22	3067.5	3946.59	4073.62	2752.33	3064.53	2772.44	2967.69	2835.91	2152.03	2735.71	2724.24	2287.2	2178.88	2191.05	2218.33	7067.37	7018.94	4232.01	4435.25	4588.91	4394.58	4353.05	4729.33	4439.44	4470.38	5876.57	5826.45	5783.06	1991.6
SLC13A2	24.5751	459.316	9.28596	10.0105	3.01785	3.14693	3.13316	11.0807	2.12137	10.101	2.45843	2.32166	3.51706	1.17228	10.6052	0	6.77803	494.564	12.338	1.12837	0.744661	5.91489	0.971673	5845.82	6163.42	0.822868	2.37053	5.24947	1.47568	0.792473	0	0	0	5017.2	4043.06	3965.39	41.1778
GAS7	367.749	111.646	469.363	474.666	492.915	590.574	520.105	3012.95	621.56	665.221	467.102	1381.39	1297.8	1305.92	1806.42	1292.23	282.418	126.516	526.834	332.868	367.862	193.501	308.02	179.044	239.385	836.856	708.787	725.302	917.135	744.132	579.646	641.419	668.935	227.998	195.773	224.721	236.019
TRAPPC6A	1018.99	1268.26	931.972	1437.35	1464.66	1033.24	712.272	884.444	1663.15	2184.7	1794.66	1242.09	1092.63	1077.32	1389.28	1335.3	934.239	2058.76	1033.93	1075.33	896.572	756.261	705.435	1922.73	1977.71	3108.79	2859.64	3107.69	2816.34	3886.29	3769.6	3568.77	3437.02	2495.45	2400.9	2353.72	1076.65
MATK	254.528	71.4927	231.305	179.355	192.136	366.093	356.136	555.044	221.683	193.361	118.005	291.368	441.977	286.036	392.393	320.146	280.159	271.106	181.369	179.41	361.16	330.389	341.057	113.777	112.117	308.575	356.369	368.338	380.726	208.42	395.317	417.957	364.425	66.3949	87.6597	129.917	241.041
CEACAM7	0	2.93805	0.844178	0	0	0	0	0	0	0	0	0	0	0	1.76753	0	0	1.64307	0	0	0	0	0	7.05591	2.02013	0	0	0	0	0	1.52338	0.827637	0	1.25273	4.86999	4.68169	0
CD79B	77.2361	67.5753	61.625	123.463	231.368	391.268	419.844	172.255	162.285	145.743	148.735	201.985	267.297	82.0595	106.052	128.058	163.802	106.799	145.589	117.35	154.145	178.292	182.675	82.9069	88.8857	79.8182	93.2407	69.993	286.282	221.892	194.992	78.6255	62.7347	92.7023	90.5817	104.168	445.926
SCN4A	60.5601	58.7611	37.988	14.1816	10.0595	46.155	18.799	4.02936	26.5171	17.3159	22.1259	18.5733	7.03412	8.20595	3.53507	4.65667	80.2067	67.3658	24.6761	55.29	244.993	489.246	349.802	41.4535	54.5435	16.4574	20.5446	7.87421	9.59192	9.50968	19.8039	22.3462	31.7198	35.0765	40.9079	33.9423	519.243
ST7L	402.857	466.171	371.438	352.037	342.023	334.623	353.003	330.407	285.324	255.41	276.574	239.131	263.78	322.377	305.783	314.325	266.603	502.779	293.645	459.245	455.732	414.887	314.822	373.081	376.754	462.452	410.101	389.336	384.415	424.766	409.789	512.307	512.451	350.765	334.081	328.889	375.622
TKTL1	4.38842	9.79352	1.68836	4.17106	2.0119	1.04898	1.04439	154.123	3.18205	0	0	4.64332	3.51706	2.34456	79.539	94.2976	2.25934	6.57227	2.46761	1.12837	2.97864	1.68997	0.971673	14.1118	11.1107	48.5492	16.5937	23.6226	8.11624	1.58495	1.52338	5.79346	8.45861	0	7.79198	3.51127	6.02603
PAX6	64.0709	134.171	70.0668	65.0685	52.3094	100.702	137.859	69.5064	65.7624	67.8208	102.025	147.425	86.7542	85.5763	169.683	165.312	152.506	119.944	162.862	133.147	89.3593	102.243	110.771	200.211	190.902	134.95	120.107	50.7449	64.1921	130.758	93.6878	167.183	236.136	199.185	211.357	250.47	149.646
RPUSD1	1494.69	500.449	1524.59	1893.66	2315.7	1925.92	1345.17	1119.15	2527.61	2962.47	2673.55	1874.74	2311.88	1936.6	1951.36	1966.28	847.254	663.8	679.826	689.432	715.619	743.586	682.115	793.79	775.73	1656.43	1852.96	1619.46	1590.78	1425.66	1709.99	1543.54	1533.12	818.035	848.351	778.331	1119.84
RHBDF1	2073.09	952.909	1699.33	1880.31	2024.98	2284.67	2477.29	772.629	1899.68	1551.22	1681.57	906.609	1141.87	999.954	761.807	1157.18	1225.69	686.803	650.215	769.546	1035.82	1511.68	1362.29	497.441	443.419	1757.65	1995.19	1871.44	1697.03	1807.63	1952.21	1779.42	1757.28	466.017	433.429	399.114	1014.38
LUC7L	4711.4	3325.88	3251.77	4013.39	4917.08	4320.73	4797.91	3247.66	3817.4	3339.09	1520.54	1956	2940.26	2916.63	1617.29	1944.16	2581.3	2435.03	2366.44	2992.43	2993.54	4012.83	4155.85	1301.81	1210.06	1199.74	1777.89	1400.73	1470.52	1972.47	2089.31	1449.19	1257.51	1286.56	1258.4	1319.07	2830.22
CACNA2D2	77.2361	693.381	41.3647	52.5553	52.3094	73.4283	78.329	53.389	41.3666	24.5309	18.4382	30.1816	31.6536	22.2733	33.5832	27.94	40.6682	312.183	18.5071	30.4659	42.4457	44.7842	46.6403	277.826	239.385	41.1434	51.3614	44.6205	36.892	38.8312	50.2715	45.52	41.5882	181.646	187.981	209.506	76.3297
BAIAP3	819.756	1352.48	834.892	959.343	947.604	2673.84	2268.41	415.024	971.586	838.381	674.84	415.577	527.559	444.294	445.419	586.741	328.735	1051.56	326.958	289.99	265.844	387.003	313.85	1085.73	1011.08	74.881	64.7944	37.6212	45.0082	80.0398	73.1222	51.3135	87.4057	805.508	900.947	959.747	617.668
TSR3	3861.81	1625.72	4132.25	5102.87	5510.59	3545.54	2612.01	2242.34	6107.41	8007.18	8681.96	2991.46	2976.61	2724.38	4164.31	3604.26	1801.83	2430.1	2225.78	1966.74	1768.57	1602.94	1493.46	2905.27	2945.35	3086.58	3001.88	3014.07	2623.76	2581.88	2975.16	2398.49	2590.45	3104.27	3003.81	3026.71	2716.73
PIGQ	6850.32	9447.81	6311.07	7372.76	8538.5	6448.06	5232.38	3793.64	9243.85	10847	8313.19	8384.68	6874.68	7915.23	6432.06	5643.89	2762.05	10717.7	1769.28	2435.02	2972.69	3138.27	2802.31	5947.25	6578.56	3188.61	3118.03	2918.71	3029.57	3452.01	3639.35	2878.52	2776.54	6690.85	6718.63	6964.01	3006.99
CRAMP1L	1273.52	639.517	980.935	1218.78	1306.73	1168.56	1085.12	840.121	1071.29	1031.74	816.2	813.742	957.813	1076.15	731.759	817.246	733.157	510.994	666.254	793.242	804.234	998.772	1027.06	462.162	478.771	398.268	430.646	475.952	577.729	674.395	578.122	336.021	339.049	453.49	457.779	463.487	521.251
TEAD3	473.071	1230.07	399.296	486.345	485.873	576.937	688.251	315.297	434.88	435.785	368.765	283.243	325.914	273.141	197.964	278.236	1075.45	980.912	985.809	1096.77	812.425	1226.92	1108.68	939.318	930.27	942.184	1089.65	1211.75	1134.8	908.174	1254.5	1029.58	876.171	932.034	901.921	826.318	901.895
SELE	7.02147	272.26	21.1044	6.67369	4.0238	68.1835	107.572	10.0734	11.6675	7.21498	4.91687	13.93	51.5836	15.2396	7.07014	60.5367	57.6133	32.8614	23.4423	10.1553	37.233	76.8936	60.2437	15.8758	31.312	1.64574	6.3214	6.12438	25.8244	35.6613	19.0422	5.79346	4.93419	26.3074	20.4539	10.5338	25.1084
DNAJC11	1959.87	1901.9	2530.84	1707.63	1450.58	1512.62	1371.28	1267.23	1297.22	1471.86	1976.58	1148.06	1076.22	1105.46	1159.5	1020.98	619.06	1252.02	552.744	613.831	628.494	663.313	681.143	2616.86	2654.45	1074.67	993.25	985.151	931.892	906.589	903.363	1123.93	1114.42	2253.67	2254.8	1924.17	931.021
FMO3	263.305	194.891	166.303	583.948	382.261	255.95	527.415	768.6	398.817	258.296	428.997	839.28	970.709	829.973	622.172	767.187	367.143	193.882	551.51	516.792	97.5506	119.143	260.408	200.211	313.12	21.3946	214.138	148.735	319.485	353.443	163.001	73.6597	31.0149	240.525	134.412	148.644	182.789
MYLIP	897.87	1180.12	658.459	690.727	673.986	581.133	695.562	994.243	766.874	623.374	794.074	1043.59	905.057	874.52	724.689	550.651	1819.9	2504.04	811.843	1166.73	1660.59	1876.71	1579.94	1892.75	1713.07	1393.94	1654.63	1511.85	1734.66	2051.71	1587.36	1841.49	1783.36	2365.16	2297.66	2425.12	2787.04
NOX1	36.8627	25.4631	17.7277	41.7106	29.1725	32.5183	16.7102	10.0734	47.7307	47.6189	38.1057	35.9857	29.3089	29.307	47.7234	44.2384	44.0572	59.1505	30.8451	33.851	24.5738	27.8845	30.1219	44.9814	37.3724	24.686	33.1874	28.8721	19.9217	21.3968	33.5143	26.4844	31.0149	36.3293	52.5958	28.0901	42.1822
E2F2	48.2726	52.885	43.8972	60.8974	63.3748	150.004	142.037	140.02	79.5512	106.782	50.3979	116.083	123.097	140.673	152.008	130.387	42.9275	6.57227	48.1184	19.1822	50.6369	53.234	68.0171	4.40994	3.0302	605.631	671.649	499.575	399.172	205.251	505	652.178	566.727	0	1.94799	1.17042	55.2386
PSMB1	2734.86	3528.6	2556.17	2848.83	2622.51	2555.31	2857.44	2888.04	2868.09	2992.77	4158.44	2982.17	2682.35	2767.75	3674.7	4179.36	5612.21	4796.12	6573.71	5466.94	5227.52	4848.52	4613.5	4542.24	4644.28	6351.72	6278.73	6306.37	5967.65	5651.13	5775.89	5513.72	5569.29	4434.68	4495.97	4761.28	2852.32
SYN1	154.472	25.4631	148.575	165.174	146.869	210.844	339.426	193.409	183.498	151.515	222.488	402.808	253.228	350.511	494.91	710.142	50.8352	64.0797	41.9493	30.4659	55.1049	40.5593	41.782	45.8634	34.3422	29.6232	32.3972	27.9972	49.4353	25.3591	26.6591	22.3462	11.983	65.1421	53.5698	66.7141	31.1345
JARID2	571.372	760.956	497.221	551.414	606.587	698.618	645.431	1596.63	676.716	506.492	431.455	878.749	1011.74	897.965	904.978	779.993	1339.79	768.956	879.702	825.964	1083.48	1275.08	1290.38	532.721	543.415	920.789	790.175	717.428	720.132	721.15	703.039	837.568	780.307	533.665	525.958	541.906	796.44
CDKL5	85.1353	63.6579	55.7157	52.5553	51.3034	53.4978	79.3734	74.5431	47.7307	37.5179	65.1485	52.2374	37.5153	75.0258	58.3286	33.7609	110.708	62.4366	54.2874	75.6006	119.89	104.778	83.5639	173.752	114.137	26.3318	18.9642	50.7449	54.6002	37.2462	11.4253	36.416	23.2612	97.7132	129.542	110.02	166.72
CAMK1G	35.985	49.9469	19.4161	41.7106	27.1606	41.959	54.3081	38.2789	26.5171	27.4169	33.1888	25.5383	24.6194	31.6515	37.1182	23.2834	221.416	331.9	74.0282	115.093	159.357	245.891	245.833	200.211	170.701	13.1659	18.9642	20.123	46.4839	36.4538	34.276	11.5869	24.671	180.394	169.475	172.052	66.2863
CDK11A	78.9915	49.9469	57.4041	52.5553	61.3629	76.5753	78.329	93.6825	68.9444	41.8469	17.209	20.8949	48.0665	46.8911	42.4208	33.7609	25.9825	16.4307	9.87043	21.439	24.5738	49.8541	29.1502	22.9317	17.1711	37.8519	28.4463	44.6205	42.0569	42.7935	67.7903	48.0029	39.4735	17.5383	19.4799	12.8746	50.2169
NADK	2428.55	1586.55	2901.44	2728.71	2604.4	2745.17	2639.17	4305.37	2741.87	2826.83	2809.99	3075.04	3291.97	3122.95	3798.43	3160.72	1137.58	1628.28	1070.94	1006.5	1352.3	1228.61	1317.59	1920.97	1974.68	3160.63	2572.81	2230.15	2128.67	2266.47	2290.4	2659.2	2825.18	1887.87	1819.43	1807.13	1452.27
TFAP2B	5.2661	2506.16	0.844178	1.66842	3.01785	0	2.08877	7.05137	2.12137	0	0	0	0	0	5.3026	0	4.51869	1194.51	1.2338	0	0.744661	0	0	1388.25	1632.27	9.05154	0.790175	8.74912	2.21352	8.7172	0	7.44873	2.81954	1498.27	1708.39	1357.69	4.01735
TFAP2D	0	0	0	0	0	0	0	0	0	0	3.68765	0	0	0	0	0	0	6.57227	0	0	0	0	0	0	0	8.22868	0	6.9993	2.21352	0	0	0	2.11465	1.25273	0.973997	0	0
DLEC1	62.3155	98.9145	43.8972	58.3948	56.3332	74.4773	82.5066	135.991	43.488	23.0879	13.5214	37.1466	62.1348	57.4417	40.6533	43.0742	9.03738	42.7198	12.338	3.3851	12.6592	16.0547	17.4901	45.8634	34.3422	20.5717	14.2232	21.8728	25.0866	20.6043	16.7572	18.208	18.327	31.3183	25.3239	59.6916	22.0954
CYTH3	719.7	904.921	640.731	649.016	616.647	1017.51	1327.42	550.007	666.109	692.638	876.431	516.57	561.558	574.417	434.813	407.459	1741.95	1164.94	1310.3	992.963	1596.55	1907.98	1983.19	1343.27	1395.91	695.323	684.292	597.565	695.045	830.512	661.146	561.965	618.888	1474.47	1456.13	1300.34	1228.31
ADAM22	981.25	530.809	1028.21	809.185	665.938	719.598	855.353	315.297	480.489	544.009	658.86	261.187	226.264	211.01	212.104	125.73	982.815	791.959	1438.62	1369.84	1087.2	1240.44	1194.19	606.808	683.814	722.478	2139.8	3187.3	2613.43	2494.71	2413.03	1579.96	1165.88	445.973	474.337	625.006	802.466
SYPL1	3197.4	4810.58	4422.65	3763.13	3620.41	2615.1	2118.02	2473.02	3662.54	4509.36	6214.92	3448.83	3354.1	3051.44	4197.89	4724.19	6160.1	6248.59	7033.92	6422.66	6497.17	5249.89	5130.44	6420.88	7060.36	4166.18	3475.98	3977.35	3651.57	4493.32	3074.94	3504.21	3452.52	6971.46	6767.33	7106.81	4650.08
CYB561	4596.43	2670.69	4721.49	5977.12	7001.41	5292.08	3528.98	3045.19	7282.65	9936.47	9474.8	6406.62	6460.84	6616.34	5832.86	6363.34	2661.51	2370.95	1721.16	1829.08	2201.96	2268.78	1967.64	3107.25	3196.86	5074.63	4187.93	4338.69	4169.53	3702.43	4108.55	4187.84	4120.75	3166.91	3080.75	2872.22	1659.17
SPAG9	5396	3233.82	6087.37	5242.18	4845.66	3956.74	4453.27	5827.46	3500.25	4800.85	5596.62	3914.32	3636.64	4127.59	4586.75	4266.68	4764.96	3779.06	4657.61	4956.91	5396.56	4802.89	4770.92	5653.55	5433.14	3493.9	2764.82	3074.44	2838.47	2787.92	2443.5	2660.02	2717.33	5329.13	5371.59	5249.35	6439.81
CELSR3	509.934	78.3481	477.805	335.353	268.588	448.962	487.729	340.481	266.231	265.511	196.675	367.983	352.879	344.65	192.661	317.818	35.0198	55.8643	69.093	56.4183	70.7428	72.6687	76.7622	39.6895	39.3925	265.786	267.869	285.221	196.265	168.797	258.974	261.533	260.807	45.0984	26.2979	37.4535	47.2039
AASS	950.531	486.738	853.464	648.182	584.456	554.908	418.799	377.752	316.084	402.596	315.909	148.586	140.682	152.396	160.846	82.6559	666.507	580.003	618.136	854.173	714.874	786.681	813.291	1280.65	1336.32	243.569	452.771	713.928	562.972	696.584	611.636	539.619	582.234	888.188	894.129	897.714	321.388
PLEKHG6	238.73	159.634	243.123	552.248	646.825	603.161	681.985	220.607	1508.29	660.892	813.741	292.529	120.752	138.329	228.012	138.536	30.5011	62.4366	43.1831	23.6957	30.5311	67.5988	29.1502	80.2609	89.8958	259.203	137.491	139.111	87.0651	114.909	127.202	314.502	437.733	111.493	93.5037	111.19	296.28
SS18L2	319.477	417.204	299.683	282.798	233.38	323.085	272.585	412.002	345.783	281.384	437.601	535.143	430.254	383.335	475.467	660.083	438.313	443.629	403.454	359.949	374.564	368.413	396.443	545.069	568.667	448.463	493.069	396.335	450.82	420.803	395.317	432.854	450.421	590.038	555.178	617.983	319.379
MPND	569.616	367.257	557.157	654.856	751.444	496.166	318.538	509.713	830.515	796.534	856.764	528.178	484.182	481.807	701.711	522.711	273.381	371.334	250.462	339.638	269.567	261.1	241.947	889.926	799.972	431.183	406.94	423.457	442.704	540.467	524.804	424.578	465.224	974.627	861.013	868.454	861.722
MGST1	19108	2560.03	24919.3	16946.2	16072.1	14108.7	12988	6634.33	17641.3	20344.8	30933.2	11445.8	11222.9	10174.2	21429.6	25830.6	4952.48	2870.44	6924.11	5786.26	5228.26	4847.68	4816.58	6188.03	6462.4	7662.54	7126.59	7837.46	6979.23	5226.36	6660.97	7029.95	7514.07	6568.08	5908.27	5792.42	7571.7
CRY1	392.324	1183.06	390.01	372.892	298.767	365.044	507.572	541.948	268.353	223.664	481.853	369.144	429.082	366.923	397.695	477.309	744.454	920.118	508.327	532.589	793.808	710.632	703.491	896.1	916.129	665.7	554.703	526.697	501.731	487.371	476.056	522.239	534.302	806.76	1001.27	833.341	704.041
PGLYRP1	3.51073	3.91741	1.68836	8.34211	5.02975	1.04898	6.26632	8.05871	2.12137	10.101	0	4.64332	7.03412	14.0673	5.3026	5.82084	2.25934	0	8.63663	7.89857	8.93593	5.06991	7.77339	9.70187	8.08052	7.40581	2.37053	4.37456	0	1.58495	2.28507	2.48291	1.40977	6.26367	1.94799	4.68169	8.0347
NFIX	2855.1	1282.95	3257.68	3788.99	4408.07	4413.04	4554.57	1609.73	5366	4771.99	6041.6	3746	2826.55	2532.12	2638.93	2589.11	2863.72	1733.44	3949.41	2990.17	2277.17	2921.96	2362.14	1787.79	1711.05	3569.6	3231.82	2434.01	2747.72	4675.59	4168.73	3863.41	4062.95	2320.06	2052.21	1835.22	6595.49
ST3GAL1	2570.73	2908.67	2621.17	2416.71	2321.73	2765.1	2891.91	5690.46	2652.77	3073.58	3545.06	4723.42	4317.78	4773.52	7487.28	8345.92	3033.17	5643.94	2425.66	2099.89	2353.13	2556.08	2435.01	9607.5	9251.19	2165.79	2755.34	2579.24	3023.67	1802.08	2400.08	2269.38	1902.48	5626.03	5629.7	6269.95	2014.7
MMP25	176.414	80.3068	116.497	197.708	219.297	361.897	314.361	285.077	266.231	187.589	104.483	235.649	362.257	246.179	178.521	136.208	85.8551	27.9322	150.524	115.093	112.444	109.003	113.686	46.7454	61.614	176.917	148.553	118.113	145.355	95.0968	129.487	189.529	152.255	38.8347	29.2199	22.238	102.442
IL32	19265.1	3823.39	14995.1	21449.2	24240.4	28596.1	21296.1	10552.9	29718.2	33950.8	33578.5	28550.6	27961.8	24643.6	20945.3	31688.7	7698.72	2668.34	5584.2	4635.33	6337.06	7692.74	5973.85	8529.71	7989.62	1878.61	2670	2038.55	3299.62	4189.81	3302.68	2277.66	1882.75	2793.6	2459.34	2051.75	15227.8
PKD1	8862.85	2296.58	7855.07	7507.9	7370.59	7527.45	7099.74	4271.12	7399.33	7836.91	7444.13	4028.08	3939.11	4496.86	3338.87	3523.94	3950.46	2490.89	4019.73	4370.16	4249.03	5027.66	4497.88	2292.29	2112.05	2050.59	2347.61	2464.63	2356.66	2539.08	3138.92	2541.67	2449.47	2025.67	2208.05	2083.35	3636.71
MAPK8IP2	35.985	112.625	41.3647	32.5342	24.1428	44.057	40.7311	69.5064	30.7598	23.0879	31.9596	128.852	208.679	205.149	203.266	244.475	16.9451	115.015	33.3127	44.0063	41.701	56.614	51.4987	244.311	335.342	102.858	116.946	64.7435	71.5705	142.645	92.9261	100.144	110.667	328.216	273.693	228.232	55.2386
MED24	2554.94	2170.24	2630.46	2816.3	2797.54	2712.65	2715.41	2272.56	2858.54	2806.63	3009.12	2413.37	2660.07	2718.51	2425.06	2509.95	2153.16	2242.79	2103.64	2488.05	2207.17	2392.15	2519.55	2826.77	2807.98	2632.35	2558.59	2532	2571.37	2413.08	2630.87	2595.47	2566.48	2718.43	2693.1	2673.25	2498.79
RHOBTB2	519.589	684.567	506.507	555.585	628.718	519.243	429.243	501.655	677.777	728.713	689.59	478.262	521.698	459.533	349.972	357.4	614.542	1503.41	368.907	343.023	465.413	548.395	521.789	1304.46	1157.53	553.79	549.962	499.575	636.756	809.907	709.133	480.857	527.254	1221.42	1176.59	1349.5	612.646
HEATR5B	1298.09	834.408	1321.14	1144.54	1104.53	1194.78	1178.07	1583.54	930.219	883.113	1165.3	1182.89	1044.57	1139.45	1216.06	1007.01	1255.07	757.455	1222.7	1337.11	1239.12	1321.56	1244.71	1013.4	1074.71	972.63	837.586	1011.4	1066.92	1216.45	982.579	1014.68	1036.18	975.879	1059.71	997.2	1538.65
SEC62	9863.41	16248.4	9160.17	10151.5	11183.1	8797.76	8024.03	7227.66	13557.7	13650.7	13066.6	13618.9	9793.85	10932.7	10661.8	13986.3	17880.5	19302.8	14291.2	13605.8	13391.2	14418	13829.8	14917.1	15246.9	6970.51	7840.12	7663.35	8691.02	9985.95	10615.7	7065.54	6658.34	15467.5	15224.5	15721.1	16047.3
RPS20	54777.1	19544.9	55167.9	63518.5	66059.7	51931.7	41970.8	41559.8	71211.1	91331.5	97731.3	89572	67880.5	79284.7	103494	115777	42627.1	25953.9	80583.4	69950.8	40455.9	32351.1	33457.6	20454.2	22503.2	32109.1	30350.6	34205.6	34071.2	43321.3	35877.1	32400.3	32774.3	24627.5	23520.1	24692.4	32237.2
CSDE1	14098.2	14587.4	21373.7	14080.7	12232.3	10882.1	11135.3	16833.6	12085.4	13923.5	25490.3	15226.6	12683.7	13083.8	22265.6	16847.8	11051.6	21502.8	17946.9	13388.1	9903.24	10152.5	10383.3	22621.2	22675	17123.1	14677.5	15028.4	15339	17297.3	13120.1	16548.6	18593.4	25991.7	26423.6	25881.6	18620.4
UBE3C	1784.33	2290.7	2167.85	1954.56	1861.01	1885.01	1792.17	2230.25	1822.25	1946.6	2957.49	2406.4	2476.01	2002.25	2396.78	2615.89	2381.35	2264.15	2830.35	2612.17	2423.13	2153.02	2230.96	3142.52	3318.06	5623.48	5021.56	4927.5	4375.39	3773.76	4170.25	5454.13	5617.22	3072.96	3199.58	2967.02	1792.74
REV3L	662.651	642.455	682.096	652.353	516.052	635.68	643.342	916.678	561.101	470.417	505.208	445.759	532.249	614.274	581.519	403.966	1038.17	655.584	905.612	1055.02	1099.86	911.738	903.656	753.218	829.264	1032.7	911.862	1140.01	1162.84	1529.47	1053.42	1040.34	1163.06	881.924	829.846	766.627	675.919
TENM1	2138.04	258.549	1947.52	1681.77	1637.69	1818.92	1806.79	664.844	1210.24	1142.85	618.296	326.193	184.06	526.353	201.499	74.5067	1544.26	220.171	788.401	1507.5	1627.83	2189.36	1917.11	321.044	224.234	754.57	1065.95	1009.65	937.795	1309.96	1234.7	1186.83	1322.36	176.635	145.126	209.506	1692.31
PAX7	2.63305	0	1.68836	8.34211	7.04164	2.09795	4.17755	4.02936	4.24273	5.77198	3.68765	9.28664	25.7918	16.4119	26.513	18.6267	0	0	0	0	0	0	0	0	0	5.76007	0.790175	0.874912	2.21352	0	3.80845	3.31055	2.81954	1.25273	0	0	0
MASP2	107.077	77.3688	112.276	94.2659	81.4819	93.3589	66.8408	74.5431	41.3666	46.1759	18.4382	20.8949	32.8259	31.6515	17.6753	26.7759	25.9825	37.7906	16.0395	33.851	29.7864	30.4194	34.9802	34.3975	18.1812	19.7488	27.6561	20.9979	14.019	26.9441	26.6591	36.416	54.2761	26.3074	12.662	21.0676	26.1128
IYD	263.305	373.133	412.803	150.158	163.97	60.8406	68.9295	46.3376	181.377	292.928	216.342	54.559	65.6518	43.3743	70.7014	16.2984	91.5034	895.472	24.6761	19.1822	22.3398	56.614	46.6403	4571.35	4368.53	12.343	1.58035	2.62474	3.6892	25.3591	3.04676	5.79346	2.11465	3780.75	3635.93	4008.7	69.2993
FAM76A	644.22	715.906	552.936	598.964	635.76	455.256	480.418	536.912	574.89	649.348	566.669	478.262	505.285	546.282	463.094	461.011	538.854	683.517	424.429	425.394	496.689	550.93	602.437	601.516	569.677	514.292	447.239	406.834	351.95	484.994	445.588	494.927	576.595	626.367	634.072	681.186	659.85
TRAF3IP3	457.273	125.357	475.272	664.866	889.259	1176.95	939.948	2413.58	649.138	572.869	351.556	1209.59	1358.76	1067.95	1053.45	725.277	301.622	233.316	289.944	204.234	568.176	395.453	628.673	379.255	365.644	534.864	628.189	570.443	763.665	696.584	669.525	607.485	616.069	360.787	395.443	451.783	381.648
POMT2	681.082	1019.51	708.265	654.856	640.79	661.904	649.609	622.535	654.442	832.609	695.736	575.772	831.199	696.334	592.124	628.651	549.021	902.045	534.237	643.169	624.026	633.738	700.576	874.933	877.747	536.51	514.404	461.954	469.266	573.75	575.075	528.032	422.226	841.837	828.872	745.559	750.24
VTA1	578.393	1198.73	688.849	588.953	542.207	545.468	629.765	809.9	544.13	487.733	908.391	836.959	724.515	631.858	917.35	990.707	1154.52	1339.1	1136.33	1092.26	1087.2	981.027	1066.9	1845.12	1911.04	1764.23	1453.13	1562.59	1397.47	1523.13	1249.93	1517.89	1570.48	1850.29	1953.84	1934.71	938.051
MLXIPL	720.578	1926.38	708.265	482.174	644.813	245.46	181.723	372.715	596.104	812.407	287.637	111.44	146.544	216.872	213.872	71.0142	1579.28	1153.43	355.336	1115.95	1035.82	2946.46	2821.74	1789.55	1900.94	369.468	274.191	377.962	274.477	740.962	759.404	348.435	426.455	2430.3	2067.8	2029.51	4979.51
BAZ1B	3570.42	5562.72	3295.67	3689.72	3891.01	3571.76	3831.86	3264.79	4524.87	4821.05	4256.78	4941.66	3900.42	4289.37	3740.1	4239.9	5272.18	5152.66	5400.36	5469.19	4736.04	4479.26	4440.55	3136.35	3087.77	7684.76	10122.9	11433.4	9184.63	7457.17	9471.61	8056.22	7313.18	3235.81	3424.57	3422.32	4732.44
RANBP9	840.821	1286.87	816.32	780.822	752.45	802.467	812.533	1349.83	711.718	725.827	998.124	911.252	869.887	829.973	982.749	993.035	1413.22	1539.56	1396.67	1192.68	1245.82	1226.92	1278.72	1894.51	1950.44	1663.84	1551.11	1582.72	1619.56	1564.34	1424.36	1621.34	1652.25	1777.63	1863.26	1941.73	1257.43
ETV7	287.002	49.9469	252.409	357.877	302.791	309.448	241.253	238.739	540.948	454.544	447.435	322.711	335.293	266.107	321.691	254.953	403.293	52.5782	440.468	451.347	576.367	431.787	407.131	32.6336	29.2919	885.406	1080.17	1087.52	1089.79	958.1	1003.14	905.435	816.961	37.582	40.9079	25.7493	679.937
SPRTN	251.895	332	227.928	202.713	183.083	228.677	252.742	269.967	179.255	227.993	211.425	278.599	247.367	291.897	259.828	307.34	320.827	284.251	267.735	233.572	285.205	341.374	274.984	455.106	470.69	356.302	335.825	241.476	326.125	286.083	260.498	355.056	355.262	399.622	332.133	367.513	254.097
METTL13	1133.09	971.517	1161.59	1099.49	1078.38	881.14	838.643	1130.23	1010.83	861.468	1043.6	940.273	1043.4	921.411	1099.41	1190.94	918.424	982.555	1299.2	1050.51	1021.67	829.775	838.554	1442.93	1509.04	1769.99	1617.49	1535.47	1517	1284.6	1270.5	1658.58	1645.2	1549.63	1606.12	1479.41	1027.44
DYRK4	645.097	538.643	620.471	652.353	771.563	740.577	751.959	966.038	750.964	790.762	693.278	682.568	724.515	655.304	623.94	754.381	602.115	455.13	613.201	444.576	527.22	570.365	587.862	355.441	427.258	408.142	401.409	432.207	465.577	448.54	380.083	319.468	312.969	413.402	377.911	442.42	402.739
ZNF207	6435.17	4590.22	5912.62	5573.37	5614.2	5441.04	5795.3	6704.85	4393.35	4252.51	3364.37	3779.66	4484.25	4737.18	3989.32	4243.39	4858.72	3723.19	4587.28	5288.65	5167.2	5429.87	5490.93	2862.93	2895.86	4120.1	4043.33	3711.38	3751.18	3291.14	3655.35	4334.33	4504.21	2829.93	2805.11	2846.47	3792.38
UQCRC1	3211.44	12666	3583.53	3211.71	3052.05	2738.88	2524.28	3183.19	3314.64	3834.04	4292.42	3725.1	3578.02	3001.03	5171.81	5004.76	4316.48	12204.7	3697.71	3714.58	3906.49	3861.58	3587.42	17963.5	18297.3	5732.1	5510.68	5944.15	5536.75	4904.62	5820.83	5216.59	5065.3	17615.9	17434.5	16746.4	4771.61
STARD3NL	1293.71	1063.58	1529.65	1425.67	1252.41	1086.74	1073.63	1720.53	1397.98	1467.53	2272.82	1836.43	1463.1	1591.95	2382.64	2167.68	2407.33	1855.02	2760.02	2572.68	2488.66	2072.75	2055.09	1689.01	1698.93	1826.77	1514.77	1783.95	1721.38	1956.62	1466.25	1569.2	1638.86	1723.76	1619.76	1853.95	2004.66
CD9	7419.93	8092.38	8467.95	6190.68	5775.15	5279.5	5345.17	5378.18	6316.37	7233.74	10120.1	7904.09	4937.96	4856.75	7787.76	5497.2	6375.87	10923.1	6276.36	4581.17	5110.61	5515.21	5130.44	9522.83	9548.15	5993.77	4278.8	4687.78	4384.98	8584.07	5346.3	5490.54	6270.65	9082.32	9507.19	10441.3	7973.44
HHATL	0.877683	4.89676	2.53253	0.834211	0	2.09795	0	2.01468	0	0	0	0	1.17235	3.51684	3.53507	0	0	9.85841	0	3.3851	5.21263	1.68997	4.85837	8.81988	3.0302	0	0	0	0	0	0.761689	0	0	7.5164	1.94799	7.02254	0
NCAPD2	2348.68	819.717	2123.95	2245.7	2213.09	2497.61	2560.84	1897.83	2032.27	2304.46	2298.63	1998.95	1873.42	1899.09	2403.85	2306.22	1390.63	856.039	1429.98	1284.08	1455.81	1389.15	1471.11	1019.58	1033.3	4582.55	4212.43	4039.47	3911.29	3022.49	3827.49	4030.59	3943.12	1111.17	1190.22	1060.4	1075.65
IFFO1	3830.21	483.8	3317.62	3356.03	3725.03	3599.04	3775.46	4965.17	2942.34	2953.81	1803.26	2546.86	3613.2	3523.87	2577.06	2653.14	1787.14	591.505	1376.93	1516.52	2091.01	2747.04	2899.47	545.069	551.496	1073.84	1420.74	1221.38	1203.42	1317.88	1331.43	1242.28	1282.89	598.807	518.166	539.565	1572.79
GIPR	102.689	154.738	51.4948	117.624	192.136	161.542	169.191	191.394	109.25	106.782	33.1888	75.454	128.959	82.0595	65.3988	48.8951	67.7803	49.2921	12.338	42.8779	61.8068	52.389	68.9888	15.8758	21.2114	197.488	253.646	321.968	299.563	232.987	295.535	359.194	322.837	21.2965	15.584	24.5789	40.1735
PHF7	230.831	263.446	219.486	144.319	189.118	187.767	219.321	239.747	133.646	142.857	109.4	164.838	223.92	175.842	174.986	140.864	144.598	262.891	134.485	135.404	148.187	159.702	192.391	276.062	258.577	116.847	120.897	120.738	115.103	129.173	118.062	115.869	116.306	230.503	230.837	257.493	150.651
SEMA3G	53.5387	1953.81	341.892	437.961	224.327	726.941	708.094	153.116	485.793	128.427	250.76	119.566	315.363	140.673	42.4208	301.52	563.706	6710.29	166.564	48.5198	472.86	914.273	935.721	5558.29	4302.88	49.3721	357.159	293.97	459.674	304.31	361.041	196.978	125.469	5897.87	6105.99	6408.06	1135.91
NISCH	3438.76	4874.23	2973.19	3114.94	3287.44	3697.64	3860.05	4496.76	2967.79	2818.17	2082.29	2387.83	3029.36	2588.39	2432.13	2313.2	2408.46	4221.04	2122.14	2506.1	2701.63	3177.14	3151.14	4509.61	4376.61	1791.38	2071.05	1970.3	2251.89	2390.1	2486.92	2083.99	1975.09	3853.41	4025.53	3743.01	2924.63
STAB1	10404.1	1902.88	11471.5	10800.5	8625.01	12397.8	17158.2	70272	10548.5	7131.29	4610.79	14113.4	20979.3	24005.9	26548.4	25154.2	5570.41	1025.27	6710.66	4859.87	5258.05	5144.27	5536.59	1793.08	1745.39	4808.84	4583.02	5222.35	6096.77	3134.23	3191.48	5593.17	5761.02	715.311	655.5	573.507	4466.29
FUZ	760.951	807.965	642.419	781.656	990.86	654.561	576.502	488.559	888.853	1194.8	977.227	558.359	400.945	502.908	503.747	365.549	666.507	897.115	646.513	780.83	723.81	726.687	628.673	1072.5	1088.85	392.508	421.954	433.081	461.15	453.295	476.056	418.784	406.013	1241.46	1291.52	1377.59	1131.89
SLC6A13	10254.9	1857.83	12566.4	6943.14	6708.68	4802.21	2724.81	2073.1	6358.8	9343.4	5504.43	2729.11	2913.3	3128.81	1947.82	1327.15	5212.31	2043.98	766.192	2479.02	4170.84	6207.26	7643.18	6633.44	6334.12	7.40581	10.2723	13.1237	25.8244	44.3785	27.4208	11.5869	3.52442	6391.45	6020.28	6075.66	6558.33
IDS	4592.92	3075.16	6419.13	4916.01	4511.68	3874.92	3734.73	4824.15	4794.29	4728.7	7522.8	4010.67	2844.13	3142.88	4367.58	3293.43	4578.56	4135.6	8927.81	6435.07	4584.88	4583.2	4805.9	3639.97	3709.97	4534	4063.87	3637.88	3889.89	3940.18	3373.52	3865.89	3795.8	3424.97	3761.58	4004.02	4974.48
PRSS3	0	19.587	3.37671	4.17106	2.0119	2.09795	5.22194	1.00734	4.24273	0	9.83373	1.16083	2.34471	0	0	0	4.51869	26.2891	1.2338	0	2.23398	1.68997	0	98.7827	94.9461	3.29147	0	0	1.47568	3.16989	5.33182	2.48291	2.81954	13.7801	15.584	19.8972	3.01301
ZNF200	179.047	334.938	167.147	222.734	226.339	266.44	313.316	413.009	230.168	184.703	173.32	268.152	321.225	318.86	212.104	271.251	263.214	241.531	288.71	295.632	241.27	324.474	310.935	220.497	206.053	326.678	321.601	256.349	276.69	265.478	250.596	308.709	362.311	194.174	197.721	225.892	179.776
CD4	1471	325.145	1834.4	2326.62	2406.23	2701.11	2841.78	12131.4	2956.12	2722.93	2555.54	7197.15	6534.7	6864.86	8443.51	6787.1	2211.9	767.313	2629.24	1752.35	2318.87	1383.24	2076.47	1045.16	1150.46	3838.68	3693.28	3191.68	4173.22	3265.78	2834.25	3701.19	3898.72	557.466	488.947	429.545	1830.91
LRRC23	1496.45	561.168	1443.54	1740.16	1747.33	1235.69	1072.59	730.321	1720.43	2189.02	2079.83	944.916	788.994	901.482	1085.27	1008.17	708.304	724.593	1070.94	992.963	688.811	659.088	549.967	543.305	621.19	394.154	345.307	359.589	366.707	567.411	452.443	438.648	407.423	794.233	666.214	709.276	455.969
BTK	270.326	16.649	335.983	382.069	423.505	469.941	436.554	1800.11	395.635	379.508	265.511	755.701	865.197	763.153	995.122	767.187	213.508	29.5752	251.696	176.025	276.269	177.447	225.428	70.5591	93.9361	649.243	596.582	425.207	486.974	458.842	340.475	592.588	688.672	26.3074	13.636	22.238	234.011
HFE	559.084	587.611	627.224	636.503	700.141	656.659	654.831	951.935	724.447	733.042	806.366	763.826	718.653	695.161	719.386	949.961	1956.59	601.363	2380.01	2334.59	1686.66	1697.57	1486.66	633.268	681.794	1714.03	1933.56	1726.2	1590.05	1390.79	1828.05	2042.61	2003.28	481.05	452.909	478.703	914.952
SCMH1	3136.84	1384.8	2828.84	3200.03	3460.47	2631.88	2116.97	1629.87	3487.53	3943.71	4094.52	2178.88	2268.51	2611.84	1954.89	1814.94	1536.35	1294.74	1679.21	1796.36	1423.05	1548.01	1371.03	1577	1627.22	1642.44	1880.62	2114.66	2122.77	2241.11	2243.17	2289.24	2051.21	1532.09	1575.93	1584.75	2742.85
FYN	1101.49	715.906	1133.73	1965.4	1301.7	1666.82	1916.45	1674.2	1812.71	1203.46	1707.38	1499.79	1464.27	1125.39	814.833	1043.09	3950.46	2829.36	2251.69	1660.96	3165.55	3452.61	3661.26	2089.43	1999.93	848.377	1372.53	1091.02	1660.88	1088.86	1243.08	1008.89	790.175	2469.14	2425.25	2677.93	4449.22
HIVEP2	973.351	1157.59	961.518	712.416	700.141	1000.72	1019.32	1112.1	793.391	691.195	838.326	825.35	787.822	807.7	890.837	813.753	1697.9	1271.74	2001.23	1728.66	1477.41	1527.73	1487.63	1270.95	1225.21	1394.76	1464.2	1539.85	1607.75	1574.64	1493.67	1586.58	1497.17	1261.5	1409.37	1362.37	1055.56
FMO1	874.173	1117.44	956.453	784.993	873.164	421.688	232.898	308.246	470.943	999.996	1073.11	417.899	513.491	412.642	480.769	288.714	742.195	1979.9	130.783	320.456	732.002	855.969	658.794	8555.29	8122.95	21.3946	41.8793	41.9958	67.8813	141.06	32.7526	17.3804	11.2781	7458.78	6986.48	6752.17	3097.38
TCEB3	1028.64	1530.73	979.246	925.14	917.426	932.54	1063.19	1293.42	916.43	880.227	925.6	1227	1151.25	1125.39	1318.58	1319	1144.36	1574.06	1027.76	885.768	988.909	897.374	995.965	1709.29	1616.1	2490.82	2579.13	2485.63	2399.46	2222.09	2207.38	2570.64	2567.19	1537.1	1775.6	1811.81	1270.49
LYPLA2	2954.28	4318.94	3120.08	3144.98	3275.37	3093.43	2508.62	2457.91	3912.86	3914.85	4277.67	3624.11	3518.23	3231.97	3877.97	3820.8	1913.66	4562.8	2075.26	1839.24	1767.82	1473.65	1417.67	4031.57	4219.04	3944.83	3223.92	3140.93	3131.39	2868.75	3071.89	3277.44	3160	4538.65	4396.62	4123.4	2199.5
CLCN6	1525.41	753.121	1511.92	1397.3	1384.19	1154.92	1004.7	1809.18	1030.98	984.123	889.953	716.232	912.091	960.096	892.605	646.113	682.322	683.517	629.24	751.492	724.555	878.784	823.007	976.361	952.492	612.214	724.591	676.307	665.532	811.492	715.988	727.493	767.619	1170.05	1211.65	1198.51	1661.17
MRC2	1084.82	1548.35	643.263	1100.32	1136.72	2190.26	3496.61	2878.97	1180.54	659.449	775.636	1614.72	2154.79	2033.9	1115.31	3452.92	4793.2	2237.86	7502.76	4331.8	2385.15	2572.13	2767.33	1265.65	1566.61	1152.84	1630.92	1693.83	2658.44	1691.93	1562.99	1368.91	869.122	3288.43	3193.74	3364.97	1196.17
NME2	0	0	0	0	0	0	0	0	0	0	0	0	0	0	0	0	0	0	0	0	0	0	0	0	0	0	0	0	0	0	0	0	0	0	0	0	0
SLC6A7	4.38842	10.7729	7.5976	2.50263	0	9.44079	14.6214	30.2202	2.12137	1.443	0	0	18.7577	5.86139	7.07014	1.16417	3.38902	1.64307	1.2338	2.25673	2.23398	5.06991	1.94335	0.881988	1.01007	8.22868	11.8526	6.9993	9.59192	0.792473	9.14027	4.96582	13.3928	0	0	0	0
TSPAN9	16629.5	4582.39	15842.7	24440.7	26681.8	17231.5	11275.2	6510.43	21680.4	36324.5	36211.5	6913.91	8678.94	8159.06	9599.48	8063.03	6877.44	7416.81	9526.2	9384.62	7783.19	6290.07	6750.21	6852.17	7134.09	1596.36	2029.96	2675.48	3025.14	3402.09	2927.17	2120.41	1946.89	7161.88	7304	7347.91	6471.95
BTBD7	1329.69	2056.64	1359.13	1444.85	1503.89	1254.58	1029.77	1230.97	1441.47	1549.78	1403.77	1250.21	1475.99	1452.45	919.118	820.738	1328.49	1744.94	901.911	953.47	1201.88	1311.42	1271.92	1830.13	1769.63	896.926	828.104	916.033	888.36	1215.65	994.766	804.463	697.131	1520.82	1650.93	1559	1725.45
APBA3	899.625	562.148	811.255	943.493	1079.38	913.658	855.353	830.047	953.554	953.82	942.809	759.183	822.993	681.094	783.018	736.918	985.074	558.643	1104.25	1114.83	1053.69	1063.84	964.872	687.069	698.965	868.125	961.643	1044.65	1080.2	1092.03	1125.01	854.121	946.66	653.927	749.004	738.537	1405.07
MKS1	675.816	547.458	613.717	733.272	672.98	707.01	767.625	491.581	680.959	610.387	496.603	564.164	701.068	684.611	583.286	549.487	602.115	471.561	566.316	797.755	625.515	670.918	686.973	515.963	596.949	537.333	572.877	547.695	543.788	587.223	578.122	549.551	558.268	539.928	562.97	531.372	656.837
ABHD5	271.204	468.13	303.904	229.408	171.011	168.885	187.99	563.102	187.741	186.146	318.367	413.256	323.57	324.721	551.471	590.233	221.416	418.982	265.268	199.721	199.569	182.517	186.561	612.982	736.338	509.355	286.834	341.216	354.163	217.93	182.805	265.671	281.954	621.356	673.032	602.768	248.071
KAL1	114.099	50.9263	234.681	181.858	172.017	286.371	346.737	1321.63	240.775	232.322	191.758	628.009	490.044	493.529	735.294	562.293	344.55	95.298	192.473	135.404	314.247	304.194	366.321	75.851	76.765	373.582	302.637	290.471	289.971	198.118	161.478	235.049	272.79	103.977	86.6857	101.827	287.241
AKAP8L	2898.99	2150.66	2733.45	2633.6	2877.01	3371.41	2875.2	2764.14	2591.25	2046.17	1273.47	1593.82	2371.67	2152.3	1799.35	1729.95	2373.44	1445.9	1917.33	3093.98	3426.18	3892.84	3796.33	1207.44	1188.85	1212.91	1465.78	1580.97	1550.94	1911.45	1781.59	1330.01	1334.35	1336.67	1209.7	1262.89	2347.14
MBTD1	1024.26	578.797	953.921	1006.06	1020.03	943.03	1059.01	1198.73	780.663	746.029	749.822	617.562	725.687	750.258	595.659	592.561	748.973	624.366	763.725	883.511	735.725	861.039	924.061	697.653	727.247	588.35	586.31	611.564	632.329	913.721	645.912	639.763	733.08	779.2	767.51	826.318	1038.49
UTP18	653.874	906.88	817.164	733.272	641.796	603.161	696.606	1341.78	623.682	737.371	979.685	1072.61	908.574	961.269	1505.94	1498.28	794.16	1183.01	1196.79	1006.5	889.87	618.529	782.197	1363.55	1428.23	1923.04	1559.81	1488.23	1412.23	1321.85	1173	1539.4	1681.85	1583.46	1585.67	1567.2	1396.03
RNF216	1453.44	1399.49	1396.27	1611.7	1768.46	1575.56	1641.78	1737.66	1828.62	1972.58	1952	2070.92	1887.49	1763.11	1673.85	1479.66	2187.05	1636.5	2605.79	2489.18	2003.88	1932.48	2069.66	1944.78	1839.33	3616.5	4491.36	4525.92	4382.77	4106.6	4826.82	4026.45	4161.64	1958.02	2091.17	1920.66	1638.07
TTC19	1030.4	3049.7	1018.92	998.551	1051.22	880.091	983.813	1235	903.702	1001.44	1035	1035.46	1138.36	1069.12	1034.01	1128.08	1791.66	3480.02	2140.65	2060.4	2050.05	1798.97	1777.19	3376.25	3695.83	2860.29	2317.58	2699.1	2432.66	2976.53	2342.19	2222.2	2402.25	3230.8	3292.11	3232.71	1781.7
PTBP1	8338.87	6166	8170.8	8189.45	8411.75	8049.84	7531.08	7750.47	8455.77	8998.52	9358.02	8362.62	8283.85	8543.57	9694.93	10706.9	9037.38	6309.38	9285.61	9349.65	8831.68	8406.75	8562.39	7339.91	7414.89	11028.9	10148.2	9595.16	9971.91	9334.54	10065	10763.4	10820	8191.63	8186.45	7305.78	9502.04
DPF1	15.7983	10.7729	9.28596	20.0211	16.0952	23.0775	29.2428	24.1761	22.2743	14.43	6.14608	15.0908	24.6194	11.7228	12.3727	25.6117	14.6857	14.7876	9.87043	10.1553	7.44661	14.3647	15.5468	10.5839	11.1107	63.3608	66.3747	48.9951	41.319	20.6043	51.0332	46.3477	49.3419	5.01093	3.89599	4.68169	5.02169
SYT7	9.65452	1907.78	6.75342	5.00527	3.01785	52.4488	72.0627	21.1541	5.30342	2.88599	2.45843	3.48249	22.2747	18.7565	14.1403	4.65667	24.8528	601.363	27.1437	19.1822	7.44661	19.4346	28.1785	870.523	1054.51	81.4639	56.8926	78.7421	95.9192	106.984	120.347	78.6255	101.503	1193.86	1319.77	908.248	38.1648
LARS2	429.187	1421.04	473.584	477.169	468.772	451.06	426.11	538.926	460.337	487.733	639.193	603.632	589.694	457.189	657.523	633.307	416.849	1058.14	351.634	337.382	382.011	358.273	410.046	2113.24	2162.55	578.476	545.221	524.072	522.391	431.898	475.294	543.757	506.107	1973.06	2031.76	1935.88	512.212
PIK3C2A	2366.23	2767.65	2735.98	2129.74	1771.48	1971.03	2253.79	2266.51	1549.66	1747.47	2269.13	1707.58	1660.05	1743.18	1762.23	1584.43	2539.5	3164.55	2594.69	2639.25	2839.39	3036.87	3223.04	3969.83	3833.2	1608.71	1536.1	1965.93	1885.92	2081.03	1728.27	1644.51	1670.58	3947.36	4139.49	4298.96	3029.08
PLAUR	2855.98	586.632	1658.81	1384.79	1473.72	1438.15	2617.23	9631.17	1548.6	1379.5	1065.73	2839.39	2660.07	3507.46	5820.49	8675.38	947.795	154.448	2859.96	1563.92	742.427	373.483	557.74	97.0187	99.9965	8896.85	5833.07	4084.96	3664.85	1433.58	2977.44	6052.51	5462.85	66.3949	59.4138	60.862	259.119
ANLN	243.996	78.3481	201.758	174.35	155.922	455.256	576.502	365.664	150.617	206.348	281.491	663.995	470.114	467.739	1064.06	1027.96	404.423	29.5752	451.572	314.814	514.561	392.918	461.545	15.8758	36.3624	4011.48	3997.5	3796.24	2856.18	1382.87	2793.88	3489.32	3681.61	20.0437	22.4019	17.5563	287.241
WIZ	2437.33	1575.78	2421.95	2683.66	2907.19	2549.01	2275.72	1937.11	3022.95	3253.96	3401.24	2588.65	2649.52	2696.24	2248.3	2373.74	2580.17	1871.46	2581.12	2442.91	2441.74	2455.53	2258.17	2240.25	2195.88	2271.94	2318.37	2372.76	2542.6	2599.31	2487.68	2389.39	2264.09	2466.63	2471.03	2226.14	2796.08
RABGAP1	1105	1599.28	1089.83	1172.07	1000.92	1014.36	1373.37	1529.14	1095.69	891.771	1187.42	970.454	968.364	919.067	915.583	881.275	2558.71	1830.38	2006.17	2142.77	2410.47	2795.21	2554.53	2107.95	2372.64	1119.92	897.639	909.909	1000.51	1034.97	931.546	941.023	1103.85	2409.01	2353.18	2316.27	3222.92
DCN	218.543	2328.9	42.2089	187.698	155.922	3456.38	7405.75	870.341	107.129	168.831	213.884	214.754	1045.74	51.5803	70.7014	246.804	1295.73	20655	1798.89	611.575	329.885	1684.05	2500.12	12300.2	14783.3	41.1434	204.655	83.9916	1394.52	2014.47	357.994	146.492	62.7347	10980.2	9468.23	10627.4	128.555
QPCTL	951.409	393.699	755.539	904.285	1107.55	959.813	717.494	652.756	1069.17	1199.13	1117.36	810.26	830.027	859.28	800.693	1011.66	326.475	423.912	526.834	514.535	422.223	387.848	456.686	322.808	311.1	2439.8	1849.01	1814.57	1730.24	1936.01	1953.73	2046.75	2051.92	308.172	336.029	334.741	447.935
PPP5C	1529.8	2160.45	1606.47	1612.53	1572.3	1479.06	1545.69	1303.5	1428.74	1474.74	1945.85	1417.37	1457.24	1505.21	1680.93	1754.4	1834.59	2198.43	1784.08	1743.33	2062.71	1918.96	1848.12	2475.74	2512.03	1277.91	1254.8	1226.63	1196.78	1120.56	1166.15	1134.69	1117.95	2698.39	2604.47	2464.91	1991.6
CEP68	590.681	866.726	492.156	569.766	409.421	563.3	618.277	720.247	470.943	382.394	587.565	578.094	463.08	484.151	470.164	486.622	1230.21	857.682	1217.76	999.733	1243.58	1153.4	1195.16	1008.99	986.834	477.263	414.052	484.701	562.972	615.752	445.588	451.89	446.192	1344.18	1269.12	1217.24	1750.56
MAP4K3	1291.07	1470.99	1526.27	1031.09	989.854	1004.92	989.035	1025.47	794.452	1002.88	1322.64	942.594	987.122	996.437	919.118	845.186	1093.52	2543.47	1228.87	1071.95	1074.55	1138.19	1112.57	1928.91	1926.19	859.897	768.841	749.8	745.219	1087.27	753.311	794.531	881.105	2201.05	2379.47	2523.43	1153.98
ZBTB32	71.0923	20.5664	60.7808	86.758	90.5354	141.612	147.259	146.064	60.4589	59.1628	38.1057	95.1881	134.821	83.2318	77.7715	86.1484	6.77803	3.28614	4.93522	10.1553	22.3398	16.0547	20.4051	11.4658	8.08052	40.3205	62.4239	45.4954	59.0272	43.586	61.6968	39.7266	51.4566	7.5164	7.79198	3.51127	27.1171
TYROBP	2041.49	108.708	2293.63	2549.35	2596.35	2932.94	2957.7	13893.2	4411.38	3575.74	3087.79	9965.73	8219.37	8373.59	11199.1	10470.5	2111.36	139.661	2462.67	1708.35	2111.86	1245.51	1856.87	578.584	675.734	6111.44	4300.92	3627.39	3651.57	3184.16	2554.71	4566.07	4968.73	205.448	134.412	166.2	1559.74
TMEM159	3018.35	516.118	3570.87	3168.33	3210.99	1979.42	1230.29	1276.3	2934.91	4036.06	5041.02	1201.46	813.614	1198.07	1620.83	923.185	886.793	624.366	1274.52	1442.05	1116.99	973.422	905.6	574.174	659.573	1497.62	968.755	1143.51	1009.37	1611.89	1012.28	873.157	910.711	984.649	978.867	853.238	2054.87
GABRA3	11.4099	2.93805	5.90924	6.67369	6.0357	8.39181	3.13316	2.01468	2.12137	4.32899	6.14608	1.16083	0	0	3.53507	4.65667	4.51869	0	9.87043	13.5404	5.21263	5.06991	0	2.64597	0	1.64574	1.58035	0.874912	0.73784	0.792473	0	1.65527	0	7.5164	3.89599	0	2.00868
BRCA1	372.138	214.478	293.774	256.103	267.582	352.456	339.426	322.348	242.896	253.967	243.385	364.501	392.739	346.994	524.958	500.592	251.917	121.587	249.228	275.321	329.14	295.745	356.604	140.236	133.329	1074.67	1053.3	864.413	779.159	455.672	672.572	882.261	857.844	87.6914	137.334	117.042	168.729
ERCC1	1794.86	1283.93	1697.64	1870.3	1748.34	1579.76	1418.28	1527.13	1709.82	2363.63	2518.66	1663.47	1609.64	1670.5	1974.34	1980.25	1642.54	1233.94	2217.15	2140.51	1727.61	1415.35	1489.58	1495.85	1552.47	3736.64	3551.84	3838.24	3753.39	3890.25	4023.24	4365.78	4339.97	1454.42	1395.74	1389.29	1469.35
CD22	51.7833	32.3186	71.7551	55.0579	86.5116	307.35	217.233	470.427	54.0948	79.3648	45.481	106.796	209.851	75.0258	162.613	101.283	67.7803	78.8673	61.6902	59.8034	55.8496	42.2492	76.7622	137.59	93.9361	170.334	155.665	90.9909	311.369	133.928	221.652	96.0059	93.7496	77.6695	112.984	154.496	242.045
SEMA3B	7443.63	7045.46	6427.57	7812.39	8512.34	8385.52	7304.44	4053.53	8812.16	9206.31	9999.68	11785.9	9313.18	9366.51	10029	11830.3	890.182	10328.3	1829.73	1685.78	1128.16	1593.64	902.684	8582.63	8286.58	2507.28	3344.02	2175.03	1992.17	2928.98	4040.76	3187.23	3322.82	9436.84	9154.6	9632.58	1912.26
MBTPS2	830.288	510.242	1192.82	895.109	874.17	753.165	785.379	875.377	850.668	1070.7	1746.72	1236.28	1126.63	981.197	1322.12	1483.15	842.735	690.089	1080.81	836.12	937.528	772.316	753.047	900.51	1012.09	1493.5	1172.62	1251.12	1269.82	1148.29	1081.6	1088.34	1102.44	860.628	832.767	731.514	946.086
PRICKLE3	609.99	232.106	514.948	537.232	549.248	545.468	586.946	498.633	591.861	522.364	578.961	419.06	470.114	485.323	558.541	620.502	290.326	259.605	333.127	291.119	297.12	272.93	321.624	237.255	219.184	569.424	590.261	684.181	579.205	407.331	509.57	546.24	548.4	233.008	279.537	243.448	282.219
LTF	362.483	5474.58	1754.2	468.827	510.016	261.195	4546.22	898.546	651.259	718.612	1255.03	1152.7	1049.26	1099.6	1087.03	965.095	1197.45	558.643	325.724	1577.46	157.123	51.5441	64.1304	1753.39	1491.87	23.0403	64.7944	116.363	504.683	1946.31	211.75	30.6226	39.4735	120.262	163.632	106.508	50.2169
EXTL3	700.391	1227.13	677.031	844.222	770.557	830.789	825.066	752.482	763.692	940.833	988.29	1045.91	1276.69	1108.98	873.162	1009.33	1910.28	1804.09	1333.74	1083.23	1413.37	1426.33	1323.42	1645.79	1720.14	1206.32	1138.64	1262.5	1474.94	1240.22	1335.24	987.371	986.133	1533.35	1621.71	1486.44	1247.39
NR1H4	1578.07	922.549	1874.92	2030.47	1904.26	1407.73	1666.84	1367.97	1600.57	1630.59	2835.8	3228.27	3511.2	3237.83	3054.3	4576.34	673.285	540.57	704.502	942.186	950.932	637.118	598.551	1102.49	1022.19	1188.22	1375.7	1750.7	1514.79	1444.68	1319.25	1449.19	1617.71	917.001	919.453	1049.87	1188.13
ELOVL5	1743.08	847.139	2297.01	1842.77	1716.15	1642.7	1768.15	2818.53	1174.18	2171.71	2576.44	2600.26	2691.72	2552.05	3119.7	2875.49	2937.15	1322.67	2755.08	2304.12	2930.98	2519.74	2669.19	2960.84	2895.86	3781.08	3674.32	4874.14	5023.95	4348.3	3678.96	3212.89	3364.41	2333.84	2093.12	2010.79	2053.87
ALOX5	3162.29	113.605	3830.03	4101.82	4501.62	3302.18	2363.45	5691.46	4779.44	3391.04	4180.57	2545.7	3192.32	3298.79	4510.75	2894.12	576.133	93.6549	1015.42	818.066	775.192	577.124	672.398	271.652	279.788	4420.45	3137	3045.57	2814.86	2249.83	1877.56	3850.17	4320.24	88.9441	74.0238	90.1225	564.438
KDM5D	749.542	1677.63	724.305	886.767	1135.72	1553.53	1662.66	3405.81	606.711	528.136	218.801	748.736	1465.44	1048.02	952.701	691.516	770.436	1220.8	396.051	473.914	937.528	1123.83	1162.12	1376.78	1391.87	1690.99	1948.57	2148.78	2327.15	2699.16	2707.04	2320.69	2289.46	1221.42	1307.1	1349.5	2748.87
CALCOCO1	4139.15	3263.2	3867.18	3180.01	3648.58	3816.18	3997.91	5046.77	2584.88	2520.91	2137.61	3014.68	3742.15	3593.03	3061.37	2975.61	2815.14	3752.77	3031.46	3729.25	3649.58	4401.52	4056.74	4005.99	3819.06	1380.77	1495.01	1840.81	1984.05	2777.62	1949.92	1913.5	2003.99	4433.42	4270	4352.8	5011.65
UBR7	803.08	994.042	932.816	878.424	855.057	778.34	763.447	912.649	826.272	998.553	1330.01	1103.95	1009.4	1024.57	1094.1	1075.69	1085.61	1186.3	1154.84	1027.94	994.867	873.714	965.843	1325.63	1260.56	873.063	866.032	900.285	915.66	980.289	859.185	754.805	762.685	1215.15	1329.51	1287.46	1539.65
MAP4K5	797.814	1135.07	900.738	792.501	658.897	939.883	1111.23	1092.96	643.835	580.084	690.82	770.791	747.962	828.801	834.276	868.469	1638.02	1248.73	1768.04	1635	1604.74	1618.15	1673.22	1022.22	1040.37	908.446	787.805	888.911	940.746	1097.58	779.208	750.667	692.196	1024.74	1058.73	1093.17	1489.43
EHD3	402.857	1244.76	350.334	475.5	438.594	475.186	551.436	461.361	515.492	461.759	581.419	492.192	466.597	439.605	376.485	345.758	919.553	11213.9	509.561	494.225	775.192	1000.46	1129.08	4963.83	3972.59	241.1	248.905	199.48	329.815	342.348	269.638	193.667	196.663	4727.82	5704.7	6646.83	826.57
PSMC4	3020.11	2489.51	3048.33	2652.79	2616.47	2603.56	2576.5	2283.64	2889.3	3163.05	3875.72	3347.84	3158.32	3100.68	3999.93	4746.31	2849.03	2806.36	2581.12	2316.54	2646.52	2675.22	2620.6	4252.07	3929.15	5937.81	6963.03	6518.09	6177.94	5011.6	6528.44	5406.95	4914.45	4265.56	3947.61	3789.83	2379.28
MAN2B2	2762.95	2011.59	3152.16	2987.31	2647.66	2446.21	2176.5	3588.14	2694.14	2611.82	4293.65	2219.51	2143.06	2121.82	2697.26	2462.22	1586.06	1976.61	1723.62	1500.73	1611.45	1603.78	1693.63	3213.08	3205.95	2409.36	2407.66	2307.14	2557.35	2508.18	2178.43	2842.93	2925.98	2385.2	2283.05	2386.49	1649.12
SLC7A14	7.02147	12.7316	0.844178	12.5132	8.04759	25.1754	29.2428	4.02936	5.30342	11.544	1.22922	11.6083	17.5853	8.20595	0	2.32834	0	47.649	0	0	6.70195	2.53495	1.94335	32.6336	21.2114	13.1659	0	0.874912	5.16488	5.54731	0	4.96582	1.40977	71.4058	83.7637	107.679	7.03036
CLDN11	49.1503	108.708	17.7277	24.1921	38.2261	270.636	285.118	26.1908	44.5487	14.43	31.9596	46.4332	62.1348	39.8575	7.07014	22.1192	45.1869	616.151	43.1831	32.7226	81.168	97.1732	135.063	632.386	476.751	24.686	43.4596	25.3724	59.0272	42.0011	32.7526	13.2422	10.5733	1547.13	1779.49	2009.62	43.1865
SLC25A39	6343.02	7538.07	6761.86	7535.43	8398.67	6217.28	4546.22	4729.46	9483.57	11370.8	10052.5	6431	6541.74	6336.17	7103.72	6260.9	3630.77	8113.47	3320.17	3242.93	3254.17	3436.55	3017.05	11136	10840	6090.04	7057.85	6952.93	6434.7	6809.72	7483.6	5865.46	5582.68	9638.53	10250.3	11192.8	3597.54
MVP	25278.2	7475.39	25185.2	26461.2	25404.2	22502.6	19461.1	13353.3	27329.6	29024.4	36260.7	17853.6	16593.5	16202.1	19130	18911.9	11314.8	5284.11	10811.8	10884.2	9936.01	9927.72	9219.24	13950.4	13491.4	12804.6	12992.9	13833.2	14372.4	11762.7	12657	13761.9	12992.4	11942.3	10594.2	9274.43	21015.8
NUB1	2844.57	1934.22	3143.72	3116.61	3302.53	2836.43	2751.96	2759.1	3522.53	3826.82	3975.29	2737.24	2607.32	2406.69	2704.33	2520.42	2723.64	2323.3	3125.23	3121.06	2788.75	2709.87	2670.16	2204.97	2101.95	4644.27	5133.77	4745.52	4688.97	4405.36	4282.98	4158.88	4414.69	2208.57	2210.97	2137.19	2692.63
PGM3	1054.1	626.785	1090.68	867.58	926.479	845.475	967.102	947.906	782.784	748.915	1058.36	770.791	781.96	669.371	781.25	795.127	1159.04	497.85	1378.16	1474.78	1180.29	1150.87	1032.89	724.995	687.854	1588.13	1345.67	1457.6	1432.89	1718.08	1409.89	1513.75	1590.92	751.64	721.732	781.842	753.253
RWDD2A	416.9	346.69	385.789	389.577	432.558	307.35	295.562	330.407	296.991	307.358	365.077	243.774	268.469	290.725	240.385	246.804	620.19	374.62	726.711	749.235	597.963	591.489	587.862	470.1	462.61	312.69	273.401	339.466	382.201	755.227	384.653	365.815	341.869	448.479	401.287	438.908	216.937
CLK1	8227.4	4334.61	6627.64	6120.61	6797.2	5466.21	5512.28	7926.75	4657.46	4036.06	2508.83	2893.95	3341.21	3822.8	3471.44	3209.61	4189.95	3368.29	5225.16	4616.15	4987.74	5689.28	6641.39	2174.1	2393.85	2057.17	2271.75	2202.15	2094.73	2324.32	2881.47	2570.64	2690.54	2717.18	2413.56	2503.53	7429.09
POLR3B	150.084	526.891	146.043	117.624	116.69	150.004	173.368	209.526	137.889	121.212	207.738	222.879	276.676	191.081	231.547	287.549	232.712	369.69	222.085	162.485	209.994	181.672	228.343	631.504	675.734	427.068	447.239	433.081	458.937	359.783	404.457	442.786	458.175	667.707	639.916	650.755	217.941
ANGEL1	678.449	671.835	697.291	800.843	713.218	669.247	798.956	1654.05	645.956	624.817	496.603	630.331	859.335	740.88	729.992	612.352	711.693	768.956	692.164	546.129	679.131	678.523	833.696	768.212	784.821	367.822	368.222	398.96	481.072	450.125	451.682	399.749	393.325	745.377	829.846	903.566	708.058
RNF14	1905.45	1976.33	2687.86	1383.96	1288.62	1185.34	1333.68	1523.1	1300.4	1633.47	1872.1	1589.18	1592.06	1577.89	1673.85	1853.36	2769.96	2559.9	2868.59	2924.73	3063.53	2759.72	2694.45	3376.25	3603.91	1439.2	1156.03	1634.34	1655.71	1715.7	1472.35	1493.88	1437.26	3254.6	3340.81	3643.53	2926.64
DNASE1L1	336.153	319.269	442.349	411.266	370.189	325.183	361.358	503.669	319.266	392.495	443.747	330.837	373.981	337.616	417.138	346.922	325.346	246.46	375.076	300.146	347.757	300.815	300.247	353.677	374.734	320.096	335.825	371.838	351.212	379.595	322.195	388.162	358.786	328.216	296.095	356.979	381.648
DDX11	3846.89	627.764	3205.34	3698.89	4008.71	3796.24	3441.26	2087.21	3406.91	3093.78	2385.91	1554.35	2116.1	2164.03	1802.88	1592.58	1050.6	575.074	1327.57	1513.14	1421.56	1558.15	1647.96	283.118	280.798	1835.82	2361.83	1833.82	1733.92	1198.22	1845.57	1895.29	1819.31	303.162	279.537	298.458	1007.35
HEBP1	1868.59	2367.09	2136.61	2012.95	1774.49	1355.28	1428.72	1733.63	2152.13	2288.59	3280.78	1563.64	1283.73	1296.54	2246.54	2074.55	1755.51	3524.38	1748.3	1298.75	1435.71	1352.82	1340.91	2541.89	2556.48	2071.16	1729.69	1700.83	1786.31	1839.33	1537.85	1661.89	1798.16	3012.82	3016.47	2873.39	1584.84
GPRC5A	727.599	1671.75	403.517	791.666	802.747	1502.13	3491.39	1044.61	1170.99	776.332	924.371	955.363	566.247	856.936	2568.23	3699.73	65.521	1868.17	80.1973	40.6212	27.5524	32.1094	36.9236	940.2	749.468	2492.47	1343.3	1007.02	833.759	1096.78	1602.59	1865.49	2168.22	1178.82	1157.11	1283.95	26.1128
MAMLD1	136.919	186.077	152.796	145.987	139.827	177.277	283.029	232.695	165.467	194.804	189.299	294.851	230.954	205.149	178.521	257.281	253.047	182.381	268.969	267.423	250.206	271.24	298.304	108.485	137.369	299.524	288.414	335.091	297.35	413.671	316.863	211.875	190.319	129.032	140.256	127.576	327.414
CD6	173.781	42.1121	139.289	272.787	313.856	705.961	457.442	956.972	334.115	269.84	242.156	847.406	743.272	576.761	480.769	473.816	288.066	67.3658	291.178	154.586	475.838	312.644	539.279	65.2671	57.5737	529.104	850.229	562.568	936.319	958.892	923.167	668.731	525.844	27.5601	21.4279	36.2831	196.85
TACC3	428.309	269.322	380.724	523.05	540.195	893.728	997.39	1404.23	579.133	453.101	405.641	995.993	1041.05	1002.3	1051.68	1200.26	539.983	141.304	438	381.388	645.621	618.529	651.021	177.28	166.661	2083.5	2149.28	1873.19	1790	1220.41	1908.03	1937.5	1877.81	131.537	115.906	126.406	472.039
UFL1	1294.58	1590.47	1376.01	1328.9	1315.78	1167.51	1305.48	1550.29	1214.48	1279.94	1634.86	1464.97	1357.59	1250.82	1497.1	1768.37	2328.25	1710.43	2493.52	2474.51	2222.07	2247.66	2024.97	2217.32	2224.16	1999.57	2297.83	2520.62	2292.47	2317.19	2259.17	2088.96	2130.16	1689.94	1884.68	1867.99	1581.83
POLA2	564.35	255.611	441.505	439.629	483.862	527.635	430.287	557.058	498.521	510.821	447.435	632.653	617.831	599.034	687.571	612.352	385.218	699.947	383.713	356.564	407.329	387.003	397.414	408.361	372.714	851.668	820.992	676.307	664.794	585.638	668.763	686.939	739.424	390.853	381.807	415.5	303.31
ZC3H3	3152.64	940.178	2757.08	3318.49	3537.92	3093.43	2285.12	2203.05	3432.37	4639.23	3774.92	3306.05	3263.83	3622.34	2654.84	2820.78	1227.95	921.761	1075.88	1182.53	1096.14	1332.54	1189.33	1028.4	977.743	1290.26	1365.42	1419.98	1483.06	1533.44	1617.07	1381.33	1210.29	1197.61	1198.02	1056.89	2173.39
CAPN1	5511.85	5471.64	5773.33	6542.72	7629.12	6743.87	4774.94	4830.19	8766.55	8238.06	8620.49	7213.4	6519.46	6105.23	6698.95	6167.76	4534.5	4166.82	4780.99	4163.67	4383.07	4085.5	4093.66	5394.24	5618.99	8257.48	7701.84	8033.44	8066.81	8024.58	7862.92	7518.25	7083.38	5866.55	5765.09	5214.23	5957.73
ACPP	26.3305	708.071	25.3253	32.5342	39.232	49.3019	42.8199	213.556	27.5778	44.7329	11.0629	76.6148	94.9607	91.4377	134.333	81.4918	5.64836	785.387	12.338	9.02693	11.9146	5.06991	7.77339	2242.01	2290.83	96.2755	75.0667	69.993	70.0948	38.8312	33.5143	77.7979	90.2252	3269.63	4305.07	4355.14	15.0651
MDH1	3189.5	7005.3	3974.39	3149.98	2629.55	2581.53	2422.98	2616.06	2490.48	3417.01	4784.11	3212.02	2939.09	2672.8	3966.35	4073.42	3742.6	6610.07	3086.98	3236.16	3472.35	3142.5	3138.5	14853.6	14748	4126.68	3958.78	5144.48	4660.94	4368.11	4253.27	3843.55	4172.92	10984	10778.3	10726.9	4247.34
SLC30A9	2730.47	3965.39	3886.59	2689.5	2224.15	2176.63	2191.12	2276.59	2105.46	2354.97	4352.66	2018.68	1760.88	1862.75	2847.5	2631.02	2101.19	4638.38	2266.5	2310.89	2244.41	1983.18	2179.46	7560.4	7597.71	2604.38	2150.07	2353.51	2085.87	2367.91	1897.37	1917.63	2114.65	7034.1	7394.59	7223.85	2749.88
MTMR11	4116.33	426.997	3247.55	2963.95	2918.26	2694.82	2149.35	1564.4	1564.51	2207.78	1449.25	1534.62	1600.26	2013.97	1299.14	1522.73	2237.88	353.26	1381.86	2625.71	2706.1	3700.19	2908.22	766.448	750.479	631.962	711.158	677.182	671.435	1321.85	791.395	924.47	847.271	764.168	722.706	681.186	5283.82
COX15	1441.16	1544.44	1760.11	1523.27	1487.8	1395.14	1296.08	1484.82	1419.19	1606.05	2068.77	1202.62	1397.45	1303.57	1843.54	1787	1389.5	1705.51	1490.44	1662.08	1484.11	1292.83	1316.62	2461.63	2485.77	1809.49	1505.28	1643.08	1564.22	1705.4	1577.46	1711.55	1812.96	2517.99	2480.77	2464.91	1796.76
CCDC88C	548.552	817.759	559.69	691.561	839.968	1139.19	1209.4	1442.51	737.175	623.374	674.84	882.231	1143.05	649.442	802.461	565.786	563.706	650.655	418.26	449.09	815.404	741.896	828.837	694.125	729.267	729.061	763.309	663.183	891.311	874.89	838.62	757.288	671.755	1128.71	1090.88	1147.01	1040.49
YAF2	879.439	1222.23	812.943	797.506	857.069	910.511	896.084	831.055	971.586	913.416	881.348	1326.83	1240.35	1277.78	1083.5	1265.45	1304.77	1514.91	913.015	904.95	1007.53	1102.7	1187.38	878.46	807.042	824.513	942.679	864.413	875.816	924.816	840.143	685.283	698.54	785.464	817.184	828.659	1292.58
ZMYND11	2274.96	3757.77	3098.13	2373.33	1887.16	1860.88	2001.05	2355.16	1843.47	1878.78	3624.96	2084.85	1818.32	1839.31	2306.63	2067.56	2693.14	4454.36	2578.65	2488.05	2569.08	2698.88	2530.24	5014.1	4986.69	2740.15	2470.88	2656.23	2564.73	3253.1	2475.49	2429.94	2561.55	5252.71	5778.72	5484.6	3200.82
WAS	681.96	94.9971	680.407	1180.41	1322.82	1432.9	1374.41	4041.44	1456.32	1186.14	853.076	2448.19	2767.93	2716.17	2612.42	2484.33	607.764	98.5841	651.449	406.212	732.746	501.921	727.783	283.118	318.171	2058.82	1890.1	1419.11	1817.3	1515.21	1472.35	1694.17	1841.16	162.855	152.918	133.428	756.266
DPEP1	109.71	1579.69	26.1695	48.3843	56.3332	111.191	151.436	157.145	67.8837	30.3029	31.9596	61.524	73.8583	49.2357	67.1663	39.5817	260.954	8156.19	215.916	84.6275	147.443	250.96	180.731	39667.4	38129	7.40581	9.4821	10.4989	23.6109	63.3978	7.61689	4.13818	4.22931	26013	23235.7	25826.5	141.612
BID	679.327	360.401	655.926	815.024	858.075	795.124	807.311	1296.45	974.768	1147.18	1167.76	1322.19	1377.52	1254.34	1535.99	1930.19	996.371	512.637	1198.02	827.093	910.72	960.748	992.078	470.982	491.902	2567.35	2248.84	2234.53	2029.06	1668.95	2093.88	2208.96	2200.65	757.904	631.15	718.639	976.216
MATR3	7073.25	8949.32	8294.05	5382.33	4181.73	4817.95	6582.77	7103.75	3960.59	3924.95	7683.83	5955.06	5277.94	5235.4	7778.92	7449.51	9771.66	11312.5	13571.8	12012.6	10458	8981.34	10189	10835.2	11254.1	8719.11	7806.93	8471.77	8442.37	8554.75	7137.79	8573.49	9059.17	11495.1	12249	12115	10184
NPC1L1	0.877683	45.0502	3.37671	5.83948	4.0238	3.14693	15.6658	13.0954	3.18205	2.88599	1.22922	1.16083	5.86177	9.37823	0	6.98501	22.5934	133.089	127.082	185.052	23.8291	20.2796	35.9519	171.988	158.58	9.05154	3.95088	4.37456	3.6892	2.37742	3.80845	5.79346	1.40977	131.537	125.646	161.518	8.0347
XYLT2	2240.73	1365.22	2015.9	2444.24	2788.49	2186.07	1830.81	1374.01	2777.93	3415.57	3302.9	2133.61	1971.9	1885.02	1794.05	1807.95	1534.09	1440.97	1668.1	1546.99	1271.88	1293.67	1230.14	1361.79	1341.37	2757.43	2740.33	2951.08	3108.52	2712.64	2541	2338.07	2350.08	1320.38	1376.26	1360.03	1912.26
RGPD5	0	7.83481	0.844178	1.66842	2.0119	1.04898	2.08877	0	2.12137	1.443	0	3.48249	1.17235	2.34456	1.76753	2.32834	2.25934	3.28614	6.16902	3.3851	1.48932	0.844985	1.94335	1.76398	3.0302	0.822868	3.95088	1.74982	0.73784	1.58495	2.28507	0.827637	0.704884	7.5164	1.94799	1.17042	3.01301
STMN4	0.877683	3.91741	0.844178	3.33685	1.00595	0	0	1.00734	3.18205	4.32899	1.22922	1.16083	5.86177	3.51684	0	1.16417	1.12967	8.21534	0	4.51347	0	4.22492	1.94335	6.17392	6.06039	0	1.58035	0.874912	0.73784	0	2.28507	0.827637	0	5.01093	6.81798	9.36338	0
NUDCD3	3803.88	2689.3	3994.65	4413.81	4505.65	3931.56	3334.73	2659.37	5223.86	5707.05	5619.98	4129.07	3732.78	3686.82	3832.01	2950	4306.31	3231.92	5304.12	5043.8	4569.24	4328.86	4262.73	3180.45	3368.57	3541.62	3900.31	3983.47	4163.63	4275.39	4281.46	3449.59	3367.94	3502.64	3517.1	3416.46	4489.39
ISL1	0.877683	0	0	0	0	0	0	0	0	1.443	0	0	0	0	0	0	2.25934	0	0	0	2.23398	0	0	0	1.01007	55.1321	54.5221	105.864	95.1814	91.1344	70.0754	76.9702	88.1105	0	0	0	0
CHDH	4406.85	3631.44	4733.3	4107.66	4466.41	3412.32	1914.36	1518.06	3939.38	5621.91	6109.21	3448.83	3579.2	3264.8	2676.05	1615.87	1494.56	2812.93	697.099	1109.18	1337.41	1613.08	1279.69	10329.8	9709.76	648.42	749.876	766.423	701.686	1295.69	810.437	499.893	468.043	7847.12	7844.57	7669.78	3580.46
IL20RA	2.63305	23.5044	0.844178	0	2.0119	3.14693	4.17755	1.00734	2.12137	1.443	3.68765	0	0	1.17228	0	0	2.25934	39.4336	1.2338	11.2837	0	4.22492	0	38.8075	63.6341	14.8116	6.3214	4.37456	5.90272	2.37742	4.57014	1.65527	6.34396	70.1531	65.2578	64.3732	0
CLCA1	0	2.93805	0	0	0	0	0	0	0	0	0	0	0	1.17228	0	0	0	0	0	0	0	0	0	0	0	0.822868	0.790175	0	0	0	0	0	0	0	0	2.34085	0
CLCA4	0	0	0.844178	0	4.0238	0	2.08877	1.00734	0	0	0	0	1.17235	0	0	0	0	0	1.2338	0	0	0	0.971673	0.881988	0	0.822868	0	0	0	0	0	0	0	0	0	0	1.00434
GLT8D1	1327.06	1552.27	1245.16	1254.65	1226.25	1322.76	1538.38	1298.46	1120.08	1212.12	1580.77	1523.01	1345.86	1318.81	1642.04	1990.73	1544.26	1682.5	1643.43	1364.2	1315.07	1211.71	1386.58	1934.2	2041.34	1542.88	1295.89	1300.12	1312.62	1349.58	1109.78	1176.9	1224.38	1826.49	1911.96	1844.59	1133.9
ATP2C1	3238.65	3448.3	4420.96	4230.29	3759.23	3210.92	3279.38	4299.32	3634.96	4018.74	6541.89	4899.87	4391.64	4270.61	6029.06	6471.61	3988.87	4027.16	5358.41	4477.36	3891.6	3420.5	3516.49	4904.74	5203.86	4337.34	3705.92	3112.94	3439.07	3690.55	3298.11	3520.77	4239.17	4605.05	4799.86	4569.33	3407.72
SRCIN1	253.65	74.4307	200.914	233.579	235.392	319.938	284.073	159.16	253.503	305.915	247.072	313.424	324.742	427.882	261.595	393.489	124.264	18.0738	193.707	187.309	129.571	153.787	120.487	24.6957	34.3422	251.798	266.289	286.971	312.106	183.854	353.424	359.194	325.657	37.582	34.0899	26.9197	80.347
IGF1	361.606	103.811	453.323	271.119	361.136	1207.37	1733.68	1173.55	473.065	356.42	329.43	846.245	722.17	667.027	636.312	343.43	316.308	864.254	278.84	265.166	302.332	277.155	374.094	194.037	215.144	89.6926	167.517	349.965	476.645	195.741	166.048	120.835	50.0468	810.519	1160.03	1313.21	136.59
SLC38A5	74.6031	87.1623	55.7157	173.516	370.189	800.369	1342.04	416.031	553.677	210.677	266.74	271.634	391.566	178.186	805.996	2024.49	234.972	118.301	2069.09	616.088	102.019	176.602	94.2523	22.9317	39.3925	55.955	66.3747	41.9958	127.646	130.758	82.2624	45.52	38.7686	55.1203	52.5958	52.669	15.0651
MAGIX	924.201	707.092	709.954	1202.1	1287.61	902.12	601.567	474.457	1551.78	1953.82	1253.8	1309.42	1127.8	1255.51	1025.17	967.424	228.194	563.573	146.823	176.025	145.954	186.742	104.941	640.324	630.281	230.403	359.53	315.843	314.32	452.502	425.023	282.224	255.873	680.234	680.824	640.221	717.097
RALBP1	2225.8	8424.38	2122.26	2464.26	2569.19	2349.71	2345.69	2892.07	3002.79	2935.05	3162.77	3779.66	2980.12	3127.64	3174.49	3343.49	4602.28	11585.3	4449.1	4636.46	3491.71	3706.95	3495.11	6666.07	6547.24	4076.49	3794.42	3854.86	3869.97	4693.82	4636.4	3769.89	3697.82	7057.9	7948.79	8847.22	4730.43
RUFY3	4478.82	1914.63	4480.05	3783.98	3521.83	3284.34	3438.12	2500.22	2815.05	3588.73	2628.06	1568.28	1765.57	2258.98	1707.44	1310.85	2475.11	1580.63	1986.42	2808.5	3052.36	3259.11	3396.97	1823.95	1769.63	2155.09	2361.04	2612.49	2221.64	2041.41	2265.26	2255.31	2413.52	1277.79	1390.87	1409.19	2147.27
CNTN1	4.38842	523.953	0	1.66842	0	18.8816	125.326	15.1101	3.18205	17.3159	6.14608	2.32166	1.17235	0	0	0	13.5561	854.396	3.70141	9.02693	2.97864	27.0395	14.5751	1077.79	1412.07	6.58294	3.1607	9.62403	8.11624	14.2645	0	6.62109	16.9172	940.803	968.153	901.225	0
SLC11A1	2425.04	295.764	1885.05	3149.15	2707.01	2001.45	2437.6	19421.5	2712.17	2173.15	798.991	2270.58	4419.77	4724.28	7953.9	7434.38	419.108	300.682	1236.27	886.896	553.283	307.574	530.534	213.441	254.536	4189.22	1187.63	1829.44	1110.45	662.507	740.362	2390.22	3359.48	147.823	150.97	132.258	671.902
WWTR1	3695.92	4029.05	4464.86	4432.16	3748.17	3022.1	3606.27	2300.76	4208.79	3894.65	7096.27	5205.16	4330.68	4162.76	4088.31	5060.64	9263.31	4405.07	8519.42	7377.26	8789.23	7398.69	7861.81	7343.44	7365.4	10070.3	8880.78	9198.83	9583.07	9725.23	9396.96	9552.58	11510.8	6504.19	6210.21	6241.86	8421.37
AGPS	1519.27	1230.07	2110.44	1562.48	1420.4	1468.57	1580.16	2032.81	1426.62	1683.98	2326.91	1813.22	1559.23	1623.61	2490.46	2310.87	2568.87	1419.61	2535.47	2532.05	2595.89	2197.8	2274.69	2579.82	2615.06	3892.16	3894.77	3518.02	3011.86	2647.65	3146.54	4028.94	4160.23	2624.48	2544.08	2360.74	2879.44
ZNF806	0.877683	1.9587	2.53253	0	1.00595	3.14693	6.26632	2.01468	1.06068	5.77198	3.68765	2.32166	3.51706	10.5505	1.76753	0	0	3.28614	2.46761	0	0	4.22492	0.971673	1.76398	0	0	3.1607	0	0	0	0	0	0	3.7582	0.973997	0	0
CXorf56	764.462	836.366	779.176	808.351	742.391	569.594	662.141	615.484	763.692	809.521	1060.81	744.092	681.138	717.435	795.39	1009.33	875.496	1191.22	1156.07	1055.02	863.062	838.225	823.007	958.721	944.411	756.215	665.328	763.798	715.705	641.903	729.698	702.664	675.984	943.308	979.841	930.486	606.62
ATP1A2	186.069	279.115	250.721	78.4159	84.4997	110.143	104.439	42.3082	27.5778	64.9348	84.8159	38.3074	60.9624	46.8911	44.1884	44.2384	55.3539	711.449	50.586	15.7971	179.463	363.343	197.25	573.292	449.479	4.11434	10.2723	20.9979	8.11624	69.7376	47.2247	6.62109	9.1635	549.95	444.143	407.307	108.468
TTC27	544.164	447.564	631.445	637.337	542.207	519.243	592.167	483.523	544.13	642.133	898.557	587.38	525.215	531.042	714.084	688.023	528.687	415.696	941.392	865.457	532.432	424.182	574.259	545.069	599.979	882.937	781.483	868.788	854.419	764.736	795.965	859.087	841.632	497.335	527.906	518.497	655.833
ZNF582	13.1652	177.263	18.5719	50.8869	24.1428	59.7916	41.7755	60.4403	36.0632	33.1889	36.8765	35.9857	43.3771	42.202	30.0481	41.91	94.8925	218.528	66.6254	68.8304	85.636	97.1732	95.224	157.876	190.902	16.4574	18.174	20.9979	26.5622	34.0763	24.3741	19.8633	20.4416	182.899	175.319	207.165	52.2256
VSIG2	100.934	262.466	48.9623	126.8	111.66	93.3589	96.0836	40.2936	74.2478	49.0619	7.3753	23.2166	56.273	33.9961	3.53507	8.14918	102.8	417.339	37.0141	59.8034	122.124	212.936	183.646	121.714	113.127	4.93721	7.90175	12.2488	11.0676	18.2269	15.9955	16.5527	9.1635	106.482	119.802	134.599	118.512
PHLDB1	4552.54	3699.01	4304.46	3660.52	3225.07	4629.13	5403.66	1952.22	2932.79	2650.78	2771.88	1742.41	1977.76	1887.37	1431.7	1766.04	4154.93	2688.06	3000.61	3116.55	4100.85	4578.97	4473.58	1830.13	1781.76	1223.6	1783.43	2391.13	2594.25	3849.04	2652.96	2026.88	2113.24	2227.36	2294.74	2121.98	3014.02
MARCO	11.4099	29.3805	8.44178	13.3474	13.0773	14.6857	14.6214	1004.32	14.8496	24.5309	20.8967	94.0273	143.027	104.333	1467.05	528.532	21.4638	3.28614	112.276	25.9524	15.6379	4.22492	25.2635	13.2298	25.2516	5913.13	1110.99	1447.98	1114.88	266.271	262.021	3532.35	3896.6	5.01093	3.89599	7.02254	15.0651
CYP24A1	7490.15	1043.99	5799.5	7789.03	6442.1	6613.79	7235.51	12128.4	2557.31	3507.92	6650.06	12405.8	4328.33	11697	24284.2	18477.7	143.468	100.227	782.232	997.476	78.1894	87.8784	69.9605	928.734	988.854	14.8116	46.6203	41.1209	47.9596	7.13226	12.187	7.44873	5.63907	182.899	201.617	236.425	3.01301
PRDM11	301.045	209.581	357.087	454.645	484.868	389.17	236.031	199.453	480.489	685.423	527.334	329.676	370.464	341.133	376.485	303.848	227.064	330.257	198.642	238.085	257.653	297.435	214.74	285.764	316.15	482.2	436.967	398.085	391.055	392.274	512.617	390.645	532.188	338.238	288.303	253.982	275.189
SYT13	1765.02	1761.85	3096.44	2088.03	1431.47	2405.3	3161.36	964.023	1218.73	1701.29	3000.52	1390.67	1066.84	851.074	2449.8	5132.82	2086.5	1999.61	2621.83	3200.05	4294.46	3061.38	3984.83	1965.95	2094.88	1355.26	1505.28	1196.88	689.143	326.499	1274.31	600.037	409.538	2430.3	2968.74	2923.72	3247.02
SNAI2	132.53	118.502	75.976	99.2711	85.5057	184.62	240.209	136.998	76.3692	40.4039	93.4204	65.0065	89.0989	69.1644	97.2144	405.13	988.463	642.44	800.739	384.773	501.901	773.161	848.271	508.025	556.546	111.087	158.825	153.11	292.923	238.534	187.376	161.389	95.1594	559.972	447.065	447.101	570.464
CD74	171066	32502.7	203205	135250	147577	116874	101952	312342	173070	187379	198882	243709	216055	214536	211033	171457	129899	35575.7	112575	102903	175547	118329	143686	74047.3	70640.9	146798	208352	232262	283570	286464	214402	195838	186089	38658.1	34204.8	34733.5	91913
HGF	213.277	136.13	227.084	247.761	158.94	217.138	273.629	631.601	183.498	209.234	184.382	365.662	396.256	393.886	342.902	242.147	5193.1	276.036	15251.1	12267.6	7768.3	5157.79	5115.86	398.659	513.113	5563.41	5814.9	8691.38	7059.65	3846.66	5085.8	4345.92	3845.85	147.823	105.192	81.9296	144.625
ZRANB1	1069.02	1360.32	1055.22	1006.89	942.574	877.993	989.035	1103.04	848.547	906.201	1052.21	934.469	862.853	958.924	1003.96	856.828	1214.4	1672.64	1253.54	1119.34	1128.16	1112	1167.95	1724.29	1737.31	925.726	729.332	771.672	811.624	1002.48	795.965	777.151	874.762	1753.83	1826.24	1899.6	1346.82
NCDN	1277.91	1245.74	1469.71	1388.96	1594.43	1258.77	918.016	853.216	1561.33	2099.56	1937.25	1393	1247.38	1227.38	1055.22	1145.54	677.803	910.26	660.085	603.676	784.128	795.131	749.16	1087.49	1030.27	716.718	823.363	924.782	1147.34	1103.12	1048.85	932.747	847.976	1198.87	1194.12	1102.54	903.904
GPR124	1166.44	314.372	817.164	1404.81	1022.04	1616.47	2087.73	745.431	763.692	639.247	904.703	474.78	728.032	723.296	348.204	566.95	4760.44	762.384	2393.58	1911.45	3716.6	4743.74	3973.17	682.659	844.415	577.653	910.282	895.91	1570.12	871.72	998.575	849.155	563.203	839.332	582.45	485.725	2266.79
CCT8L1P	0	9.79352	1.68836	0.834211	1.00595	4.1959	5.22194	0	4.24273	4.32899	0	1.16083	1.17235	7.03367	0	2.32834	0	0	0	4.51347	0	1.68997	1.94335	0	0	0	1.58035	1.74982	0.73784	0	0.761689	0	0.704884	0	0	0	0
ZFP64	476.582	327.103	569.82	503.029	496.939	434.276	598.434	364.657	497.46	444.443	751.051	504.961	451.356	400.919	609.799	658.919	455.258	456.773	497.223	475.042	417.01	455.447	434.338	489.504	545.435	676.397	500.971	568.693	553.38	590.392	536.991	605.83	594.218	636.389	723.68	632.028	661.859
MNAT1	198.356	460.295	219.486	213.558	208.231	220.285	233.943	180.314	199.408	246.752	351.556	263.509	212.196	226.25	268.665	320.146	311.79	527.425	356.569	260.653	285.205	312.644	258.465	600.634	641.391	205.717	246.535	221.353	197.003	212.383	219.366	173.804	182.565	595.048	591.216	623.835	475.052
SAMD4A	1304.24	1630.62	1166.65	895.109	823.872	993.38	1328.46	1392.14	658.684	852.811	585.107	827.672	916.781	902.655	906.745	941.812	1074.32	456.773	1527.45	1328.09	1124.44	1144.95	984.305	500.969	469.68	455.046	421.163	401.585	466.315	397.821	437.971	460.994	444.782	611.334	519.14	630.858	1359.87
RUNX3	1345.49	93.0384	1302.57	1771.86	2199	1939.56	1404.7	2405.53	2171.22	2266.95	2058.94	2852.16	2581.52	1897.92	1946.06	2094.34	922.942	83.7965	863.663	611.575	1328.47	948.918	1301.07	58.2112	55.5536	1022.82	1357.52	906.409	1367.22	1306	1422.07	914.539	809.207	61.3839	65.2578	65.5437	570.464
MRE11A	415.144	248.755	505.662	384.571	366.166	417.493	474.152	632.609	256.685	261.182	313.45	378.431	377.498	393.886	510.817	436.563	431.535	308.897	526.834	512.278	476.583	441.927	487.78	306.932	304.03	390.039	511.243	485.576	483.285	477.069	484.434	428.716	523.729	266.832	241.551	190.779	335.449
PLEKHB1	201.867	815.8	157.017	212.724	217.285	178.326	130.548	243.776	173.952	284.27	314.679	754.54	556.868	630.686	597.427	497.1	53.0946	1258.59	32.0789	30.4659	40.2117	63.3738	46.6403	1063.68	1101.98	253.443	250.486	175.857	253.079	637.148	377.036	230.083	310.149	1217.66	1209.7	1283.95	35.1518
SERPINB1	1463.1	1719.74	1676.54	1602.52	1613.54	1731.86	1688.77	3646.57	1819.07	1900.43	2277.74	2717.5	2483.05	2199.19	3892.11	3591.46	2841.13	2150.78	3835.9	3698.79	2968.96	2576.36	2621.57	2481.92	2303.96	6530.28	5639.48	5854.04	5318.35	3983.76	4350.77	5876.22	5555.9	1948	2146.69	2323.29	3804.43
CYP3A43	2.63305	4.89676	3.37671	9.17632	7.04164	7.34283	8.3551	7.05137	3.18205	11.544	1.22922	2.32166	1.17235	1.17228	0	6.98501	11.2967	1.64307	11.1042	30.4659	17.8719	6.75988	6.80171	5.29193	4.04026	4.11434	2.37053	4.37456	1.47568	1.58495	3.04676	4.13818	2.11465	5.01093	5.84398	1.17042	3.01301
SLC7A9	369.505	225.251	411.959	334.519	328.945	285.322	289.295	167.218	310.78	344.876	325.742	361.018	433.771	448.983	394.16	307.34	446.221	507.708	75.262	196.336	477.328	719.082	514.987	4078.31	3956.43	7.40581	21.3347	13.1237	12.5433	8.7172	23.6124	15.7251	15.5075	3870.95	3325.23	3387.2	927.004
SPAST	530.121	374.112	694.758	623.156	595.522	502.46	570.235	805.871	556.859	649.348	778.094	919.378	804.235	797.15	784.785	833.544	664.247	510.994	814.311	645.426	640.408	567.83	649.078	534.485	631.291	1029.41	806.769	743.675	705.375	660.13	596.403	776.323	881.105	459.753	498.686	585.211	491.121
NRXN3	150.962	184.118	61.625	107.613	130.773	204.55	269.452	144.049	111.372	73.5928	79.8991	81.2581	128.959	59.7862	54.7936	96.6259	324.216	501.136	156.693	181.667	226.377	420.802	377.009	226.671	147.47	92.9841	165.937	162.734	141.665	76.8699	100.543	133.25	82.4715	199.185	206.487	287.924	788.405
OSBPL5	956.675	1080.22	720.084	1011.9	930.503	940.932	1142.56	815.944	914.309	695.524	834.638	859.015	929.677	982.37	648.685	809.097	1558.95	879.042	1871.68	1633.87	1541.45	1564.91	1693.63	939.318	1064.61	1182.46	1371.74	1406.86	1469.04	1382.87	1396.18	1364.77	1263.86	1584.71	1211.65	935.168	2691.63
AQR	931.222	858.891	1121.91	943.493	747.42	921.001	947.259	1271.26	894.156	779.218	1262.41	1171.28	989.467	1008.16	1171.88	1096.65	1166.95	890.543	1217.76	1194.94	1114.01	1026.66	1109.65	1180.1	1137.33	1213.73	1218.45	1446.23	1390.83	1314.71	1268.21	1306.01	1406.95	1033.51	1125.94	1087.32	1306.64
CPS1	14.0429	77.3688	2.53253	10.0105	8.04759	267.489	565.013	164.196	10.6068	25.9739	8.60451	479.423	430.254	579.106	418.906	366.713	90.3738	138.018	111.042	73.3438	88.6146	124.213	138.949	472.746	421.197	232.049	329.503	300.97	293.66	168.004	282.587	134.905	157.189	368.304	338.951	356.979	69.2993
C8B	0	0.979352	0	0.834211	0	0	0	0	0	0	0	0	0	0	1.76753	0	0	0	0	0	0	1.68997	0	4.40994	2.02013	0	0	0	0	0	0	0	0.704884	1.25273	0	0	0
FHL1	32321.6	1452.38	35200.5	12338.8	11902.4	4965.85	5553.01	4127.07	12540.5	15691.1	13412	4927.73	2758.55	2741.96	3413.11	932.499	5937.56	2267.43	3465.76	4145.62	4638.49	7766.25	6078.79	1727.82	1817.11	433.651	444.079	392.836	626.426	1149.09	687.805	661.282	730.26	1876.59	1468.79	1571.88	4368.87
RTFDC1	3717.87	2156.53	3368.27	3351.03	3305.55	2595.17	2198.43	2649.3	3503.44	4027.4	5242.61	2985.66	2411.53	2559.08	3893.88	3669.46	2478.5	2722.56	2635.41	2558.01	2295.79	2067.68	2063.83	3350.67	3345.34	2945.04	3069.04	3118.19	3012.6	2886.98	2829.68	2856.17	2794.16	3555.26	3591.13	3582.66	3142.57
GABRA1	0	0	0	0	0	0	1.04439	0	0	0	0	0	0	0	0	0	0	0	0	0	0	2.53495	0	0	0	0	0	3.49965	0.73784	0.792473	0	2.48291	0.704884	0	0	2.34085	0
NLRP2	14.9206	120.46	19.4161	25.0263	16.0952	19.9305	27.1541	152.108	23.335	18.7589	4.91687	366.822	434.943	346.994	413.603	492.443	7.90771	47.649	7.40282	6.7702	8.93593	10.1398	0.971673	74.087	57.5737	95.4527	63.214	69.1181	90.7543	38.0387	38.0845	71.1768	99.3887	115.251	75.9718	100.656	10.0434
SLC45A4	1126.95	3816.53	1511.08	1224.62	1258.44	1140.24	993.212	1440.49	1376.77	1447.32	1274.7	1637.93	1773.77	1601.33	1076.43	1069.87	1481	2949.31	893.274	830.478	952.421	1069.75	1027.06	2867.34	3123.12	666.523	653.475	641.311	774.732	721.943	738.839	619.072	587.874	1807.69	2064.87	2068.14	1436.2
RNF10	4220.78	8583.04	5146.95	4529.77	4035.87	3944.15	4227.68	5000.43	4476.08	4666.65	7267.13	7112.41	6187.68	6009.1	8010.47	7933.8	4671.19	8903.79	5004.31	4557.47	4287.76	4032.27	3913.9	9632.2	10043.1	5794.63	5945.28	6470.85	6983.66	7388.23	6511.68	5824.91	5591.14	9989.3	10848.4	10362.9	5645.38
ZNF839	413.389	931.363	275.202	330.348	391.314	441.619	466.841	560.08	333.055	253.967	243.385	399.326	500.595	548.626	381.787	367.877	525.298	911.903	403.454	468.272	539.134	550.93	620.899	737.342	811.082	459.983	502.552	425.207	484.023	553.939	514.14	408.025	428.57	819.288	716.862	839.193	886.83
ZDHHC6	1748.35	1972.41	1901.09	1746	1719.17	1529.41	1392.17	1890.78	1542.23	1529.58	2208.9	1266.47	1338.83	1335.23	1728.65	1598.4	1705.81	6018.56	1791.48	1827.95	1769.31	1755.88	1727.64	3848.12	3438.26	1580.73	1379.65	1415.61	1235.14	1205.35	1198.9	1364.77	1441.49	4578.74	4670.32	5175.61	1992.61
GRAMD1B	387.058	324.165	269.293	429.619	268.588	316.791	379.113	707.152	289.567	298.7	360.16	434.151	461.907	545.11	371.182	365.549	874.366	704.876	874.767	446.833	653.067	356.584	440.168	3054.33	3044.34	3683.16	6144.4	5935.4	5337.54	5219.23	6453.79	4635.59	5066.71	2672.08	2549.92	2593.66	150.651
RNH1	6271.05	5790.91	6765.24	6878.07	7194.55	5768.32	5494.52	6654.48	7406.75	8217.86	9498.16	6374.12	6194.72	6059.51	8279.13	8674.22	4396.68	6815.45	4530.53	3995.55	3929.57	3893.69	4171.39	8122.23	8171.43	7345.74	6819.21	7359.76	7302.4	7424.68	7320.6	7154.09	7700.86	9212.6	9020.19	8535.89	7374.85
NDUFS1	2848.96	5248.35	3689.06	2368.33	2184.92	2033.96	1933.16	2108.36	2046.06	2405.47	3492.2	2364.61	1943.76	2017.49	2667.21	2486.66	3129.19	5164.16	2192.47	2618.94	2966.73	2702.26	2520.52	9361.43	9533	5950.98	5493.3	6307.24	5249.73	3736.51	5724.86	6550.75	6225.54	8491.03	8606.24	8092.3	2822.19
RB1CC1	3967.13	2415.08	3984.52	3654.68	3735.09	3125.95	2969.19	3245.65	3883.16	4559.87	5119.69	6769.96	5402.21	6893	5818.72	6698.62	3139.36	2870.44	2740.28	2544.47	2381.43	2304.27	2493.31	3087.84	3071.61	2441.45	2566.49	2516.25	2639.99	3200.01	2652.96	2362.9	2437.49	2887.55	2921.02	3071.19	2952.75
ERP44	1605.28	1969.48	1791.35	1567.48	1453.6	1365.77	1392.17	2854.8	1708.76	1666.66	2363.78	2601.42	2180.58	2303.53	3059.6	3867.37	2971.04	2540.18	2505.86	2235.29	2596.63	2447.08	2485.54	2836.47	2994.84	2452.15	1947.78	1745.45	1975.94	2064.39	1746.55	2160.96	2260.56	2768.54	2652.19	2862.85	2927.64
ALAS1	499.402	3883.13	643.263	524.719	459.719	470.99	504.439	725.284	353.208	502.163	830.95	781.239	819.475	723.296	942.096	875.454	743.324	2752.14	764.959	705.229	744.661	707.252	629.644	2339.92	2415.07	1520.66	1291.15	1201.25	1250.64	1075.39	1059.51	1180.21	1296.28	2491.69	2475.9	2388.83	840.631
BIRC3	14080.7	2079.16	12757.2	16576.6	14355.9	32299	31205.2	19298.6	21775.8	13627.7	19998.1	35910.3	28267.8	27396.2	70887	56430.7	18533.4	1289.81	62445.3	36263.4	26335.7	15029.7	20017.4	859.057	759.569	34056.8	58095.3	60445.1	49629.3	25707	34340	35268.9	31456.2	608.829	640.89	633.199	3904.87
AKAP11	2058.17	1341.71	2909.04	2208.16	1744.32	1801.09	1515.41	2620.09	1440.41	1569.98	2357.64	1423.18	1344.69	1356.33	1845.31	1648.46	2654.73	1751.51	3601.47	3290.32	2928.01	2602.55	2684.73	2597.46	2483.75	1633.39	1474.47	1680.71	1567.17	1600	1431.98	1517.89	1655.77	2282.48	2413.56	2508.22	1802.79
GLRX2	251.895	207.623	285.332	226.071	205.214	225.53	252.742	242.769	226.986	298.7	365.077	263.509	239.16	202.804	272.2	484.294	233.842	192.239	249.228	220.031	215.207	235.751	185.59	377.491	392.915	433.651	476.476	497.825	419.831	289.253	379.321	481.685	458.88	345.754	334.081	325.377	280.21
SNAPC1	285.247	486.738	238.058	251.098	192.136	210.844	280.94	529.86	241.836	249.638	222.488	450.402	351.706	532.215	659.29	940.648	302.752	469.918	461.443	297.889	284.46	230.681	263.323	246.957	310.09	156.345	105.093	104.989	107.725	83.2097	77.6923	134.077	97.9789	238.019	264.927	289.094	380.644
DERA	3590.6	1299.6	5224.62	3516.2	2661.74	2207.05	2151.44	2014.68	2615.64	2787.87	6200.17	2424.97	2533.46	2207.4	2911.13	2825.44	1471.96	1427.83	1622.45	1367.58	1314.33	1273.39	1281.64	2965.25	3084.74	1505.85	1634.08	2448	2265.91	1957.41	1753.41	1439.26	1623.35	3309.72	3213.22	3253.77	3135.54
STRAP	4269.05	4106.42	5986.06	4628.2	4568.02	3977.72	3956.14	3386.67	4287.28	5562.75	8087.01	4490.09	4742.17	4027.95	6228.79	6356.36	3132.58	5187.17	3848.23	3145.89	3161.08	2649.87	2925.71	5777.02	5758.38	4204.85	3461.76	3545.14	3262.73	3164.34	2779.4	3202.95	3457.46	6005.6	6118.65	6106.09	2512.85
ABCC2	3206.18	274.218	4212.45	2812.96	2625.53	3167.91	3234.47	1740.68	2199.86	2245.3	3076.73	1794.64	2465.46	2518.05	3528	4554.23	1013.32	443.629	275.138	537.102	1645.7	2153.87	1831.6	1913.03	1742.36	3075.06	4165.8	4600.29	3702.48	2402.78	3737.61	3954.45	4166.57	1446.91	1282.75	1419.72	2039.81
DEF6	579.271	183.139	468.519	823.367	1166.9	1490.6	1312.79	2324.94	999.164	784.99	545.772	1447.56	1878.11	1641.19	1389.28	923.185	510.612	134.732	541.64	370.104	756.575	585.574	791.914	131.416	151.51	1049.16	1289.57	1060.39	1426.98	1149.88	1211.85	1123.1	1147.55	78.9222	62.3358	79.5887	457.978
PLEKHO1	2491.74	791.316	1845.37	2763.74	2773.4	3322.11	3789.04	9177.86	3762.24	2994.22	2480.56	5428.04	6068.1	6070.06	5385.68	4596.14	3638.67	1411.4	3259.71	2358.29	2330.79	2320.33	2555.5	741.752	810.072	3059.42	2846.21	2317.64	3122.54	2867.17	2530.33	2525.12	2639.09	670.212	614.592	716.299	2257.75
GCLM	1699.19	1176.2	2385.65	1891.99	1681.95	1535.7	1543.6	1877.68	2021.66	1981.23	2969.79	1293.17	1261.45	1166.42	2262.44	2197.95	1165.82	982.555	1956.81	1235.56	1184.01	1064.68	1188.36	1595.52	1522.17	1523.95	1679.12	1449.73	1264.66	990.591	1218.7	1741.35	1932.09	1264.01	1393.79	1395.14	1489.43
UBR2	1490.31	2032.15	1438.48	1338.07	1348.98	1532.55	1681.46	2454.88	1202.81	1014.43	1058.36	1339.6	1466.61	1278.96	1343.33	1225.87	2289.85	1822.16	2463.91	2442.91	2406.74	2385.39	2355.34	2192.62	2107	1560.98	1476.84	1629.09	1677.85	1862.31	1506.62	1753.76	1781.24	1844.02	2198.31	2110.27	2333.08
EHD2	7829.81	1065.53	7488.7	9802.82	9201.42	8026.77	7436.04	3638.51	10175.1	10926.4	12763	8331.28	7804.36	7796.83	7188.56	8948.96	7954.02	1960.18	6967.29	6053.69	6605.89	7900.61	6350.86	1310.63	1277.73	3821.4	4246.4	4632.66	5578.07	4942.65	5152.07	4191.98	3441.95	1572.18	1339.25	1228.94	16306.4
DEPDC1	59.6825	31.3393	49.8065	57.5606	48.2856	100.702	88.7729	71.5211	45.6094	38.9609	79.8991	121.887	93.7883	105.505	238.617	213.043	76.8177	1.64307	76.4959	51.9049	90.104	67.5988	108.827	7.9379	6.06039	1203.86	1002.73	904.659	645.61	344.726	596.403	949.299	1010.8	1.25273	2.92199	2.34085	43.1865
CCDC28A	751.297	1351.51	787.618	883.43	919.438	750.018	695.562	1056.7	994.921	1128.42	1192.34	941.434	867.542	839.352	1058.75	1072.2	1197.45	1539.56	1378.16	1326.96	1087.95	1024.97	1062.04	2163.52	2270.63	1262.28	1080.96	1169.76	1155.46	1552.45	1241.55	1195.11	1335.76	2082.04	2245.06	2208.59	1099.75
RRAGD	889.093	3342.53	1455.36	870.917	836.95	505.607	402.089	1706.43	849.607	1279.94	1514.39	817.225	732.721	691.644	1562.5	1189.78	1952.07	4147.11	3394.19	2898.77	2486.42	1862.35	1672.25	4653.37	4975.58	1810.31	984.559	1146.13	1016.01	1444.68	948.303	2363.73	2779.36	3961.14	4268.06	3717.26	1748.55
HSF2	193.968	230.148	191.628	207.719	198.172	165.738	193.212	225.644	178.195	167.388	221.259	240.292	184.06	166.464	153.775	225.849	379.57	322.041	361.505	371.233	347.012	359.963	335.227	356.323	369.684	405.674	436.967	433.956	408.763	446.955	424.261	384.023	406.013	345.754	368.171	372.194	258.115
PHF20	2762.95	2144.78	2503.83	2756.23	2844.82	2414.74	2413.58	2139.59	3101.44	3158.72	3506.95	3580	2797.24	3044.41	2607.11	2754.42	2264.99	2139.28	2594.69	2235.29	1933.88	1815.03	1921.97	1492.32	1480.76	1918.93	2059.2	1923.06	1929.45	2176.13	2226.42	1829.08	1660	1753.83	1794.1	1774.36	1958.46
HSD17B6	0.877683	9.79352	4.22089	7.5079	3.01785	12.5877	67.8852	45.3302	4.24273	5.77198	7.3753	27.8599	44.5495	16.4119	47.7234	33.7609	35.0198	21.3599	28.3775	5.64183	12.6592	18.5897	31.0935	22.9317	33.3322	57.6007	43.4596	57.7442	38.3677	32.4914	40.3695	28.1397	21.8514	17.5383	13.636	17.5563	13.0564
NR1H3	2045	793.275	2069.08	2316.6	2714.05	2328.73	1847.52	3269.82	2732.32	2894.65	2678.46	2120.84	2124.31	1759.59	2582.37	2499.47	1209.88	910.26	1578.04	1860.68	1508.68	1320.71	1358.4	1097.19	1150.46	1573.32	1863.23	2128.66	2130.14	1611.1	1940.78	1708.24	1578.24	1310.36	1164.9	1231.28	1266.47
TYMP	11971.6	1412.23	10729.5	13899.6	14252.3	15134.6	15593.7	20836.8	17346.4	14383.8	13182.1	16826.2	18134	16560.8	21733.6	24693.2	3861.22	492.921	5478.09	4602.61	4623.6	4280.69	4285.08	748.808	772.7	9469.56	10744	8896.11	8886.55	7294.71	7716.67	8599.15	8610.87	380.831	363.301	341.763	5630.32
NCAPH2	2392.56	1418.1	2153.5	2784.6	2685.88	2250.05	1857.96	1614.76	2956.12	3238.08	3424.6	2239.24	2062.17	2202.71	2306.63	2238.69	1757.77	1567.49	2091.3	2214.98	1816.97	1842.07	1667.39	1245.37	1298.94	2313.9	2409.24	2242.4	2150.8	1844.88	2407.7	2236.27	2098.44	1438.14	1329.51	1401	2511.85
TOMM34	1711.48	1538.56	2073.3	1678.43	1805.68	1442.34	1056.92	1035.54	1898.62	2655.11	2720.26	1610.07	1629.57	1386.81	1956.66	2019.83	682.322	2053.84	737.815	637.527	646.366	634.583	555.797	1606.1	1663.58	1579.91	1297.47	1228.38	1313.36	1592.87	1325.34	1195.94	1299.1	1920.44	2044.42	1956.95	837.618
SEC63	2113.46	2965.48	2792.54	2476.77	2496.77	2188.16	2394.78	2849.76	2741.87	2685.42	4242.03	3552.14	3086.81	3063.16	4093.61	4402.88	4107.49	3243.42	5449.71	4811.36	3639.16	3396.84	3378.51	3424.76	3614.01	3172.98	3070.62	3313.29	3391.85	3711.94	3292.02	3242.68	3396.13	3433.74	3385.61	3539.36	2596.21
KPNA6	3237.77	3815.55	2842.35	3319.33	3818.58	3014.76	2867.89	2768.17	4113.33	4216.43	3615.13	4285.79	3709.33	4162.76	3356.55	3647.34	2388.13	4138.89	2025.91	1922.74	1853.46	1945.15	2003.59	3157.52	2860.5	3316.98	3651.4	3553.89	3505.48	3360.88	4091.79	3705.33	3322.12	3093	3135.3	2772.73	2933.67
VIM	28402.7	6059.25	23795.7	26261.8	21693.3	34810.3	48514.9	25471.6	23713.7	29324.6	39761.5	40341.2	33285.5	34547.1	47507.8	77165.7	73581.2	9707.25	92315.7	85340.6	81647.6	62506	61914.1	5670.3	5651.32	64112.1	50541.2	60506.3	55519.5	43980.7	46362.5	64085.6	62433.7	7919.78	6230.66	5877.86	71892.5
RTEL1-TNFRSF6B	651.241	84.2242	575.729	337.021	332.969	507.704	481.462	341.488	242.896	174.602	68.8361	76.6148	155.923	134.812	100.749	97.7901	116.356	19.7168	69.093	126.377	212.973	259.41	207.938	21.1677	24.2416	56.7779	84.5488	61.2438	68.6191	64.9828	97.4962	86.9019	95.1594	21.2965	18.5059	19.8972	75.3253
FAS	1177.85	339.835	1538.09	1238.8	1000.92	1358.42	2080.42	1320.62	1023.56	953.82	1916.35	1610.07	1336.48	1290.68	2172.3	3238.72	1266.36	349.974	1603.95	1572.94	1576.45	1153.4	1427.39	488.622	472.711	1352.79	1228.72	1287.87	1280.15	1343.24	955.158	1027.92	1029.84	229.25	260.057	305.48	794.431
RNASET2	9342.06	910.797	8752.44	11724.8	11375.3	8212.43	7072.59	9796.37	12155.4	12556.9	13258.3	10091.1	8106.83	9094.54	11683.4	16048.1	28683.5	660.514	21037.6	33770.9	28227.1	25610.6	21280.6	864.349	913.099	11137.5	10952.6	14655.7	13991.7	8731.47	10375.7	16522.9	12488.4	813.024	711.992	607.449	24771
CD44	3189.5	1344.65	3122.61	5299.74	4030.84	6476.38	8223.5	13518.5	4310.62	3897.53	9133.08	8748.02	7656.64	6646.82	17109.7	20397.4	3838.63	952.98	11851.9	6166.52	4884.97	3331.77	5146.95	811.429	1067.64	47411.2	37557.8	25861.5	23915.6	12801.6	19052.9	42083.7	38818.7	719.069	594.138	660.118	1342.8
KCNG1	3.51073	20.5664	1.68836	3.33685	5.02975	6.29386	13.577	17.1248	4.24273	1.443	3.68765	2.32166	8.20648	4.68911	15.9078	20.955	81.3364	44.3629	35.7803	24.8241	20.8505	123.368	91.3373	7.9379	16.161	69.1209	71.1158	25.3724	40.5812	25.3591	65.5053	64.5557	74.7177	25.0547	41.8819	29.2606	1.00434
AGPAT4	241.363	865.747	185.719	242.755	219.297	256.999	374.935	659.807	251.382	157.287	161.027	239.131	362.257	228.594	380.02	376.026	518.52	428.841	445.403	412.982	429.669	472.346	517.902	542.423	569.677	631.14	369.012	350.84	317.271	229.025	290.204	488.306	415.882	715.311	705.174	651.925	304.314
SLAMF7	117.61	9.79352	131.692	280.295	1058.26	1225.2	959.792	2433.73	333.055	467.531	490.457	1951.36	2019.97	860.453	1088.8	1159.51	239.491	11.5015	144.355	112.837	446.052	210.401	430.451	30.8696	37.3724	464.92	576.038	432.207	1018.22	1142.75	703.039	460.166	393.325	18.791	11.688	19.8972	141.612
BTN3A1	1918.62	576.838	1936.54	2308.26	2554.1	2464.05	2414.62	3981	2297.44	2079.36	2057.71	2424.97	2630.76	2140.58	2179.37	1540.19	3264.75	844.537	2942.62	3177.48	4748.7	3978.19	4444.43	692.361	696.945	3213.3	3502.85	3410.41	3379.31	3662.81	3352.96	3250.96	3339.74	539.928	626.28	660.118	2363.21
MIPEP	507.301	1268.26	767.358	645.68	610.611	472.039	350.914	401.928	625.803	746.029	1069.42	373.787	347.017	315.343	510.817	601.875	666.507	1212.58	708.204	760.519	764.767	601.629	584.947	1967.72	2146.39	822.868	773.582	1079.64	985.754	1061.12	958.205	900.469	841.632	1905.41	1851.57	1842.25	680.941
PRKCH	502.035	582.714	502.286	642.343	488.891	741.626	822.977	1402.22	647.017	406.925	631.817	1224.68	887.472	705.712	936.793	788.142	1656.1	744.31	1104.25	783.086	1644.96	1421.26	1726.66	544.187	573.717	882.114	1135.48	917.783	1108.24	962.855	821.863	780.462	747.177	608.829	671.084	682.356	1678.25
INSRR	1.75537	267.363	5.06507	5.00527	10.0595	10.4898	17.7546	24.1761	1.06068	1.443	0	20.8949	31.6536	10.5505	12.3727	18.6267	0	833.036	1.2338	0	3.7233	4.22492	4.85837	949.02	684.824	37.8519	82.1782	156.609	183.722	84.7946	139.389	226.772	137.452	374.567	477.259	586.382	3.01301
IFNGR1	1900.18	1636.5	2313.05	2068.84	1963.61	2147.25	2400	6334.15	2303.8	2092.34	2570.29	3980.49	4367.02	3981.06	5891.19	6856.95	4340.2	2298.65	5159.77	3637.85	3909.47	3381.63	4109.21	2301.11	2402.95	6045.61	5538.34	6162.01	6616.21	5974.45	5264.03	4542.9	4805.2	1872.84	1815.53	2011.96	3155.63
B4GALT7	3410.68	1230.07	3247.55	4434.67	5718.82	3429.1	1916.45	2053.96	6526.38	7088	6489.03	2981.01	2777.31	2998.69	3105.56	3126.96	1652.71	1399.89	1659.47	1686.91	1464	1495.62	1295.24	1280.65	1302.98	1232.66	1385.97	1572.22	1587.83	1660.23	1742.74	1464.09	1581.06	1092.38	1190.22	1159.89	1100.75
SH2D2A	188.702	39.1741	172.212	291.14	306.815	500.362	515.927	929.774	417.909	310.244	256.906	1233.96	898.023	669.371	1104.71	1254.97	192.044	31.2183	180.135	128.634	259.887	161.392	279.842	9.70187	12.1208	608.922	869.193	612.438	636.756	538.089	741.124	841.707	874.762	10.0219	11.688	12.8746	101.438
VRK2	333.52	239.941	404.361	327.845	296.755	312.595	383.29	601.381	266.231	253.967	354.014	326.193	330.604	293.07	493.142	413.28	281.288	266.177	355.336	326.098	340.31	263.635	295.389	338.684	278.778	616.328	604.484	552.944	521.653	498.466	371.704	555.344	538.532	259.316	279.537	245.789	281.215
TNFRSF1B	2388.18	703.174	2668.45	3904.11	3683.79	3569.67	3634.47	14263.9	5017.03	4041.83	3446.72	8260.47	8117.38	7857.78	9452.77	8217.86	2026.63	389.407	2352.86	1386.76	1894.42	1371.41	1843.26	695.889	834.314	5834.13	5216.74	4376.31	4834.33	3903.72	3827.49	4800.29	4487.29	556.214	435.377	468.169	2508.84
VEZT	2112.58	1706.03	2544.35	2183.97	1960.59	2212.29	2362.4	2308.82	1880.59	2008.65	2872.68	2788.31	2521.73	2486.4	3071.97	2828.93	1852.66	1633.21	2446.63	2102.15	2072.39	1853.05	1854.92	1735.75	1777.71	3072.59	2920.49	2654.48	2640.73	2253	2345.24	2637.68	2549.57	1543.37	1615.86	1592.95	1931.34
POU2F2	804.836	243.859	616.25	1259.66	2117.52	1944.8	1766.06	1980.43	2000.45	1584.41	819.887	1707.58	2560.42	2324.63	1136.52	689.187	597.597	138.018	665.02	602.548	477.328	427.562	535.392	193.155	208.073	505.241	960.853	811.043	1474.94	1295.69	1348.95	805.291	650.608	82.6804	67.2058	72.5662	683.954
BRD9	2346.93	3664.73	1908.69	2551.85	2622.51	2547.96	2115.93	1978.41	2843.69	3025.96	2248.24	2284.51	2483.05	2373.86	1779.91	2068.73	2533.85	4702.46	3095.61	3600.62	2767.16	2722.54	2599.23	1699.59	1518.13	2297.45	3418.3	2866.21	2788.3	2199.91	3047.52	1994.6	1522.55	1927.96	1871.05	1901.94	1745.54
SNX1	3914.47	3847.87	4326.41	3644.67	3394.07	3532.95	3656.4	5303.64	3238.27	3670.98	4230.96	4679.31	4310.75	4527.34	5732.11	5601.98	3744.86	4253.9	4085.13	3883.84	3794.79	3724.69	3671.95	5950.78	5897.77	4220.49	4586.18	5317.72	5294.74	5120.96	5099.51	4547.86	4590.91	5932.95	5942.36	6102.58	4665.15
TBPL1	199.234	429.935	195.849	173.516	153.91	190.914	279.896	321.341	188.802	167.388	186.841	217.075	230.954	195.771	250.99	270.087	567.095	777.171	635.409	462.63	542.113	502.766	482.922	556.535	583.818	522.521	406.94	428.707	423.52	578.505	370.181	415.474	433.504	680.234	620.436	750.241	300.297
ARNTL2	131.652	58.7611	110.587	152.661	124.738	182.522	200.522	394.877	133.646	118.326	325.742	220.558	198.128	193.426	461.326	448.205	237.231	49.2921	336.829	303.531	248.717	151.252	210.853	17.6398	15.151	2249.72	1611.17	1291.37	966.571	668.055	709.894	1673.48	1550.04	31.3183	19.4799	17.5563	55.2386
BCLAF1	2594.43	4338.53	2496.23	2353.31	2321.73	2483.98	3008.88	4001.15	2311.23	2069.26	2522.35	2913.68	2642.49	2756.03	3079.04	3213.1	3957.24	4331.13	4871.06	4524.75	3774.69	3756.8	3661.26	3779.32	3893.8	4530.71	4447.9	4157.58	4060.33	3845.87	3902.13	4236.67	4108.07	3686.8	4105.4	3855.37	3122.49
SLC39A9	1320.91	2693.22	1564.26	1561.64	1522	1337.44	1297.13	1536.19	1500.87	1632.03	2527.27	1664.63	1592.06	1342.26	2131.65	2081.53	1853.79	3113.62	1555.83	1490.57	1606.98	1365.5	1488.6	4025.4	4273.59	1671.24	1382.02	1650.96	1650.55	1678.46	1484.53	1462.43	1478.85	3644.2	3928.13	3775.78	2514.86
ANK1	114.099	71.4927	168.836	174.35	109.648	238.118	436.554	101.741	86.976	255.41	164.715	320.389	358.74	348.167	196.196	336.445	968.129	93.6549	1045.03	907.207	1109.54	701.337	865.761	57.3292	67.6744	381.811	424.324	669.308	498.042	175.137	392.27	714.251	486.37	67.6476	51.6218	46.8169	499.156
IBSP	10.5322	0	0.844178	9.17632	2.0119	33.5672	61.6188	21.1541	6.3641	47.6189	22.1259	16.2516	48.0665	23.4456	132.565	43.0742	135.561	0	256.631	201.978	20.1058	9.29483	31.0935	0	1.01007	438.588	708.787	316.718	347.523	103.814	145.483	259.878	85.9959	0	0	0	4.01735
TFB1M	190.457	314.372	196.693	185.195	150.892	239.167	210.966	232.695	189.862	151.515	212.654	224.04	216.885	220.388	213.872	204.894	395.385	315.469	433.065	443.448	338.821	359.118	366.321	379.255	384.835	437.766	433.016	443.58	410.239	372.462	380.845	399.749	402.489	341.996	388.625	351.127	223.967
RABEP1	1090.08	2056.64	1224.9	1029.42	1022.04	1109.82	1121.67	2095.26	980.071	1001.44	1098.92	1110.91	1119.6	1100.77	1339.79	1223.54	1909.15	2510.61	1969.15	2009.62	1851.23	1773.62	1945.29	2488.09	2446.38	1867.91	1604.06	1720.08	1693.34	1703.02	1527.95	1512.09	1609.96	2744.74	3068.09	2943.61	1778.68
HMGB3	187.824	1032.24	227.084	241.087	249.475	345.113	330.026	345.517	296.991	334.775	350.327	684.89	563.902	493.529	791.855	887.096	265.473	931.62	262.8	129.762	244.249	226.456	253.607	887.28	974.713	1901.65	1409.67	790.921	768.092	990.591	1111.3	758.943	736.604	811.771	730.498	760.775	328.418
NUP160	1362.16	1098.83	1370.94	1268.84	1132.7	1235.69	1412.01	1373	1077.65	1139.97	1333.7	1040.1	1154.77	1053.88	1216.06	1038.44	1359	984.198	1665.64	1691.42	1580.17	1495.62	1539.13	1430.59	1446.41	2220.92	1776.31	1986.05	1857.14	1784.65	1701.61	1824.11	1989.18	1365.48	1292.49	1308.53	2178.41
BAK1	887.338	1258.47	995.286	785.827	963.699	902.12	680.94	1121.17	1081.9	1366.52	1022.71	1372.1	1377.52	1300.06	1279.69	1271.27	771.566	768.956	751.387	741.337	879.444	669.228	724.868	687.069	733.307	1896.71	1604.85	1645.71	1597.42	1406.64	1473.11	1600.65	1479.55	716.564	697.382	665.97	480.073
MUSK	8.77683	9.79352	2.53253	3.33685	3.01785	6.29386	6.26632	4.02936	0	4.32899	3.68765	0	0	1.17228	0	2.32834	1.12967	3.28614	0	3.3851	5.95729	8.44985	3.88669	4.40994	3.0302	3.29147	1.58035	5.24947	0	0.792473	0	2.48291	4.93419	0	0.973997	0	1.00434
IKZF2	213.277	380.968	308.125	275.29	299.773	391.268	378.068	776.658	258.807	222.221	201.591	614.079	368.119	372.785	381.787	332.952	263.214	239.888	240.592	226.802	323.927	307.574	380.896	171.106	187.872	230.403	258.387	233.602	247.914	255.969	250.596	233.394	224.153	180.394	255.187	214.187	196.85
GRN	6396.56	7707.5	7888	8769.23	7816.23	7513.82	8954.57	27153.8	10431.8	8669.52	12045.1	17549.4	17536.1	15054.4	22901.9	23724.6	13413.7	10448.3	13579.2	10246.7	11747.8	8773.48	10610.7	10875.8	10102.7	20150.4	16484.6	16021.4	18034.3	20113.8	14750.1	18952.9	21275.5	10837.4	10335.1	10020	11582
FAM13B	949.653	734.514	992.753	587.285	553.272	692.324	777.024	1099.01	505.946	505.049	496.603	648.904	562.73	614.274	620.405	565.786	918.424	895.472	753.854	798.884	834.02	1012.29	891.024	1192.45	1146.42	617.974	664.538	650.06	783.586	859.041	596.403	667.903	661.886	1143.75	1109.38	1269.91	1094.73
ARHGAP31	696.003	530.809	809.566	739.945	504.986	810.859	1142.56	1124.19	726.568	474.746	694.507	744.092	853.474	819.423	828.974	759.038	1642.54	859.325	1221.47	973.78	1462.51	1483.79	1529.41	1218.91	1208.04	939.715	1240.58	1071.77	1517	1073.8	1093.79	886.399	926.923	1292.82	1256.46	1199.68	2041.82
NR2E3	7.02147	44.0708	2.53253	5.83948	11.0654	1.04898	10.4439	8.05871	5.30342	8.65797	1.22922	17.4125	5.86177	16.4119	1.76753	8.14918	24.8528	26.2891	8.63663	24.8241	49.1476	36.3343	32.0652	11.4658	12.1208	38.6748	52.9418	41.1209	24.3487	64.9828	57.8884	38.0713	35.9491	11.2746	11.688	11.7042	11.0477
CENPQ	91.2791	100.873	94.5479	78.4159	81.4819	127.975	112.794	138.005	110.311	111.111	110.629	161.355	112.546	154.741	159.078	189.759	246.269	187.31	254.164	258.396	213.718	200.261	240.975	141.118	163.631	254.266	273.401	272.973	238.322	167.212	212.511	259.878	279.134	130.284	170.449	180.245	176.763
SARS	5746.19	3772.46	7563.83	5399.85	5199.75	4483.32	4821.94	3574.04	5297.05	5608.92	9332.21	3939.86	3478.37	3549.66	5958.36	5380.78	3392.41	3923.65	4484.88	4102.74	3105.98	3213.48	3224.01	4418.76	4680.64	4195.8	4418.66	4672.91	4609.29	4714.42	4257.84	4532.14	5507.26	4895.68	5035.56	4812.78	5327.01
RANBP3	1974.79	1898.96	1842.84	2218.17	2247.29	2261.59	2014.62	2236.29	2515.94	2505.04	2457.2	2421.49	2497.11	2266.01	2195.28	2214.25	1945.3	2002.9	1847	1794.1	1866.12	1972.19	1872.41	1940.37	1985.79	2764.01	2858.06	2642.23	2647.37	2692.03	2916.51	2650.92	2384.62	2207.32	2284.02	2082.18	2280.85
ARID4A	1999.36	4452.13	1331.27	1888.65	2082.31	2024.52	2129.51	2552.6	2498.97	2220.77	1575.86	2578.2	2400.98	2506.33	1829.4	1802.13	2642.3	4421.5	2004.93	1868.58	1849.74	2312.72	2312.58	2087.67	2169.62	1463.06	1970.7	1631.71	1650.55	1762.46	2029.9	1692.52	1341.39	2108.35	2322.98	2418.09	4311.62
TSSC1	1199.79	1217.33	1391.2	1368.94	1383.18	1194.78	1049.61	885.451	1644.06	1858.58	2006.08	1333.79	1260.28	1271.92	1307.98	1171.15	764.788	1463.97	678.592	689.432	751.363	762.176	735.557	1405.89	1470.66	910.915	897.639	850.415	848.516	789.303	875.181	785.427	783.831	1324.14	1317.82	1336.62	706.049
PNPLA6	3017.48	3283.77	2752.86	3377.72	3312.59	3563.37	3066.32	4184.49	3837.55	3874.44	3089.02	4259.09	4560.46	4343.29	4607.96	5094.4	2978.95	3176.05	3459.59	3049.97	2631.63	2636.35	2701.25	3508.55	3462.5	4321.7	4076.51	4141.83	4182.82	3944.93	4123.02	3960.24	3687.96	3537.72	3656.38	3455.09	3124.49
IFT88	1759.76	1388.72	1706.08	1681.77	1576.32	1063.66	599.478	728.306	1315.25	1275.61	1461.54	445.759	427.909	570.9	514.352	548.323	1004.28	1046.63	969.77	1208.48	1217.52	1109.46	1085.36	1665.19	1802.97	678.043	776.742	797.92	689.881	807.53	690.852	922.815	829.649	1718.75	1601.25	1567.2	1061.58
ALG1	1035.67	473.027	1236.72	1159.55	1200.1	1012.26	693.473	717.225	1385.25	1562.76	1948.31	1151.54	1335.31	988.231	1486.5	1740.43	580.652	561.929	663.787	581.109	635.196	523.89	537.335	764.684	791.891	785.839	707.207	833.791	850.73	740.962	793.68	691.904	721.802	689.003	693.486	742.048	592.559
ZCCHC8	1295.46	1076.31	1023.99	1081.97	1038.14	1089.89	1202.09	1335.73	988.557	979.794	800.22	1050.55	1077.39	1150.01	959.771	949.961	1390.63	816.605	1474.4	1449.95	1271.88	1334.23	1381.72	751.454	740.378	1054.92	1122.05	1056.02	1024.12	1085.69	1042.75	1135.52	1225.09	682.74	752.9	766.627	1601.92
ABCF2	1190.14	1660.98	1463.8	1334.74	1266.49	1244.09	1078.85	1271.26	1339.64	1662.33	1858.58	1453.36	1543.99	1525.13	2046.8	2095.5	1853.79	1833.66	2488.58	2201.44	1963.67	1713.63	1734.44	1845.12	1704.99	4466.53	4364.14	4222.33	3772.58	2822	3659.16	4421.24	4361.82	1994.35	1952.86	1851.61	1049.53
CHPF2	1702.71	1080.22	1576.92	1871.97	1977.7	2088.51	2213.06	2230.25	1880.59	2008.65	2872.68	2369.25	2495.94	1916.68	2561.16	3565.85	2336.16	1130.43	2840.22	2213.86	2120.79	1782.07	1864.64	1128.06	1162.59	3813.99	3710.66	3472.53	3436.12	2529.57	3318.68	3328.76	3280.53	1022.23	1049.97	1074.45	1391.01
LRRC7	136.919	77.3688	99.613	105.111	104.619	102.8	118.016	96.7045	83.794	70.7068	71.2946	38.3074	55.1006	86.7486	49.491	39.5817	131.042	14.7876	145.589	217.775	261.376	196.881	212.796	105.839	93.9361	44.4349	50.5712	38.4961	42.0569	17.4344	24.3741	49.6582	42.9979	101.471	83.7637	72.5662	23.0998
FUT8	296.657	282.053	398.452	288.637	427.528	676.59	674.674	529.86	317.144	316.016	468.331	971.615	893.334	760.809	689.338	1025.63	523.038	489.634	509.561	383.645	450.52	485.021	559.684	530.075	515.133	557.081	652.685	559.069	725.297	962.855	687.805	509.824	493.419	497.335	512.322	468.169	470.03
UBA6	2165.24	1109.61	2204.99	1786.05	1743.31	2094.81	2249.61	2870.92	1410.71	1523.8	1627.48	1463.81	1408	1491.14	1672.09	1795.15	1307.03	882.328	1585.44	1554.89	1512.41	1359.58	1578.97	905.802	871.686	2990.3	2301.78	2330.77	2110.96	1457.36	1618.59	2458.08	2560.14	715.311	779.198	846.216	951.108
GAB2	600.335	520.036	758.072	722.427	682.034	673.443	791.645	2829.61	642.774	701.296	811.283	1139.94	1243.87	1205.1	1647.34	1351.6	1086.74	875.756	840.221	844.018	1038.8	1019.9	1019.29	1010.76	898.958	1003.08	637.672	722.677	728.248	522.24	575.075	650.523	658.362	1036.01	884.389	1094.35	2252.73
ATP6V0A1	4746.51	2317.15	5344.49	4952.71	5338.57	3954.64	2989.04	4613.61	4952.33	5884.54	5272.11	4284.63	4779.69	4828.62	4282.74	3828.95	2496.58	2315.08	2051.82	2889.75	2855.77	2785.91	2465.14	4891.51	4549.33	2647.17	2616.27	2433.13	2446.68	2397.23	2521.95	2510.22	2371.94	3710.6	3567.75	3472.64	2805.12
PIAS1	754.808	688.484	863.594	795.838	705.17	760.508	764.491	1340.77	858.093	607.501	818.658	1079.57	981.26	1107.8	1016.33	1060.56	905.997	911.903	926.587	878.998	946.464	774.851	727.783	922.56	932.29	935.601	992.46	1056.89	1086.1	1126.9	923.167	980.75	966.396	930.781	941.855	981.985	973.203
SLC4A7	2382.91	2295.6	3006.96	2336.63	1933.43	2437.82	3116.45	5711.61	1714.06	2115.43	2073.69	6444.93	4309.57	4870.82	6257.07	6624.12	1943.04	727.879	1728.56	1873.09	2168.45	1721.23	1817.03	538.013	654.522	933.955	1097.55	1076.14	939.271	907.382	949.826	986.543	964.282	582.521	594.138	404.966	547.364
APBA2	720.578	51.9056	1035.81	908.456	1025.06	999.674	650.653	641.675	835.818	1419.91	1462.77	1264.14	1440.82	1319.99	1186.02	1292.23	80.2067	47.649	40.7155	57.5467	83.402	80.2735	119.516	43.2174	69.6945	68.298	72.6961	89.241	123.219	119.663	174.427	92.6953	142.387	45.0984	62.3358	23.4085	72.3123
UHRF1	175.537	29.3805	123.25	180.19	206.22	380.778	461.619	537.919	135.767	147.186	103.254	442.276	480.665	424.365	553.238	648.442	205.6	9.85841	176.434	152.329	227.122	199.416	238.06	13.2298	10.1007	1471.29	1435.75	1115.51	1017.48	442.992	951.35	1135.52	1153.9	3.7582	7.79198	9.36338	104.451
MAP2K3	1290.19	4458.99	1181	1584.17	1610.52	1643.75	1740.99	2034.82	1833.92	1852.81	1728.28	1893.31	1966.04	1640.02	2092.76	2265.47	1931.74	2321.66	1891.42	1413.84	1726.12	1731.37	1701.4	2719.17	2890.81	2410.18	2387.91	2247.65	2211.31	1685.59	1980.39	1863.01	1898.96	2893.81	2740.83	2487.15	2135.22
EFCAB1	6.14378	13.7109	2.53253	5.83948	1.00595	2.09795	2.08877	3.02202	2.12137	0	2.45843	0	5.86177	0	1.76753	1.16417	5.64836	0	4.93522	7.89857	4.46796	0.844985	2.91502	20.2857	17.1711	5.76007	4.74105	5.24947	5.90272	8.7172	1.52338	5.79346	4.22931	16.2855	13.636	12.8746	8.0347
TMSB10	48144.4	19368.6	44445.1	56122.4	54252.9	65619.8	66681	56836.1	76380.9	76400.9	82037.9	94980.3	81459.8	74204.1	103076	153135	65698.3	18497.7	106145	81083.3	63853.9	50420.2	55625.4	11439.4	11993.5	87530.9	101935	91796.6	88233.1	85887.4	91484.2	84356.1	78192.8	11683	10555.2	10581.8	63768.4
ASTE1	195.723	161.593	247.344	190.2	184.089	195.11	158.747	215.571	197.287	151.515	181.924	242.614	256.746	293.07	196.196	246.804	215.767	169.236	259.099	266.295	231.589	210.401	272.069	228.435	204.033	213.123	218.088	219.603	219.876	223.477	210.226	230.911	247.414	222.987	224.993	220.039	266.149
RNF19A	9605.37	3264.18	9926.69	7733.14	7465.15	6804.71	6793.74	6761.26	6022.56	5362.17	6256.71	7270.28	7685.95	8943.31	7782.45	8064.19	3778.75	2525.4	3236.27	3898.51	5328.05	5445.93	5227.6	2792.38	2827.17	1366.78	1760.51	1806.69	1898.46	2019.22	1949.16	1577.48	1743.18	2341.36	2424.28	2626.43	3209.86
PEX3	332.642	577.817	409.426	281.129	253.499	305.252	295.562	326.378	254.564	291.485	352.785	262.348	273.158	229.767	390.625	421.429	297.104	686.803	264.034	326.098	332.863	333.769	317.737	1143.06	1186.83	362.062	344.516	405.959	338.669	354.235	333.62	392.3	398.26	967.11	956.465	998.37	306.323
GABARAPL2	2754.17	3520.77	3042.42	3136.63	2970.57	2470.34	2407.31	2422.65	3024.01	3727.26	4704.21	3153.98	2668.28	2808.78	3582.79	4111.84	2890.83	4549.66	2629.24	2350.39	2720.99	2453.84	2479.71	4276.76	4321.06	2320.49	2012.58	2110.29	2282.88	2500.25	2136.54	1998.74	2097.03	4771.66	4819.34	4881.83	2975.85
MYOC	380.037	71.4927	309.813	327.845	422.499	276.93	105.483	122.895	334.115	327.56	130.297	172.964	166.474	212.182	118.425	98.9543	290.326	1.64307	199.876	331.74	383.5	338.839	325.511	9.70187	12.1208	1.64574	3.95088	20.9979	11.0676	5.54731	7.61689	3.31055	0	11.2746	4.86999	9.36338	203.881
SH3YL1	2609.35	3346.44	3212.1	2549.35	2180.9	1716.13	1441.25	1311.56	1947.41	2324.67	3101.31	660.513	690.517	756.12	1014.56	847.514	2531.6	3470.16	1289.33	2113.43	2803.65	3205.87	2850.89	7622.14	7319.94	525.812	475.686	576.567	631.591	983.459	886.606	605.83	754.226	7748.16	8227.35	8184.77	3673.87
FAM136A	1163.81	1485.68	1235.03	1216.28	1253.41	1146.53	967.102	1133.26	1180.54	1200.57	1246.43	1020.37	1214.56	1132.42	1596.08	1466.85	1078.84	1325.96	1147.44	1158.83	1185.5	1181.29	1141.72	1285.94	1362.58	3061.07	2853.32	2432.26	2044.56	2085	2304.87	2412.56	2690.54	1277.79	1386.97	1376.42	1031.45
VCL	2560.2	8691.75	2046.29	3050.71	1917.34	2561.6	4040.73	1661.1	2332.44	1659.45	2494.08	1547.39	1846.46	1564.99	1569.57	1696.19	7495.38	6792.45	5410.23	5246.9	5676.55	7080.13	6435.39	4566.05	4534.18	5545.31	4113.65	4040.34	4123.05	3807.83	3711.71	4169.63	4347.73	4678.96	4954.72	4661.79	6527.19
DEPDC1B	52.661	53.8643	23.637	15.85	22.1309	58.7427	60.5745	84.6165	18.0316	23.0879	29.5012	118.405	106.684	82.0595	178.521	172.297	66.6507	409.124	78.9635	57.5467	110.954	93.7933	106.884	186.1	154.54	339.021	283.673	295.72	252.341	135.513	258.213	369.126	407.423	170.372	198.695	203.654	36.1562
DAPK2	485.359	155.717	448.258	362.048	440.606	314.693	443.865	289.106	687.323	365.078	382.286	128.852	153.578	85.5763	164.381	97.7901	214.638	246.46	603.33	231.315	176.485	209.556	173.93	146.41	142.419	243.569	403.78	426.082	400.647	315.404	388.462	288.845	241.775	107.735	79.8678	102.997	159.69
NSMAF	1226.12	777.605	1430.04	1244.64	1240.34	1283.95	1478.85	2419.63	1264.33	1238.09	1423.43	1743.57	1896.87	1919.02	2308.4	2554.18	964.74	665.443	1443.55	1404.82	1195.93	1062.15	1223.34	781.442	788.861	1799.61	1623.02	1491.73	1405.59	1363.85	1272.02	1626.31	1915.17	710.3	715.888	746.73	957.134
ADSS	693.37	1400.47	932.816	744.116	633.748	735.332	890.862	1236	575.951	617.602	969.852	979.741	914.436	865.142	1295.6	1536.7	1076.58	1189.58	1031.46	1134.01	1207.1	922.723	1037.75	1678.42	1738.32	1687.7	1562.97	1462.85	1463.87	1205.35	1297.92	1502.16	1602.2	1679.92	1801.89	1623.38	901.895
STAP1	10.5322	712.968	14.351	15.0158	37.2201	57.6937	92.9505	39.2862	26.5171	31.7459	34.4181	29.0208	30.4812	23.4456	19.4429	18.6267	13.5561	1043.35	18.5071	13.5404	10.4253	11.8298	9.71673	516.845	413.117	14.8116	17.3839	6.9993	34.6785	16.6419	32.7526	14.0698	18.327	453.49	580.502	784.183	21.0911
TIMP2	2506.66	4269.97	2697.15	3220.06	2407.24	3765.82	8314.37	8254.13	3309.33	2559.87	3499.58	4725.74	4838.31	4301.09	5272.55	4759.12	10103.8	9115.74	5892.65	4595.84	6378.76	9873.65	10449.4	6050.44	6360.38	6903.04	4283.54	3116.44	3983.6	5374.55	3377.33	5044.45	5339.5	6983.99	6586.17	6314.43	7922.22
RFC1	2893.72	1697.22	2897.22	3240.08	3318.63	2467.19	2259.01	2055.98	3520.41	3997.1	4352.66	3039.05	2419.74	2712.65	2741.45	2499.47	2905.52	2850.72	2611.96	2521.9	2525.89	2273.85	2347.56	2776.5	2755.46	1314.94	1536.1	1541.6	1527.33	1605.55	1453.3	1300.22	1205.35	3119.31	3309.64	3033.74	2944.72
TBC1D23	1416.58	1060.64	1576.08	1358.93	1220.22	1174.85	1468.41	1605.7	1075.53	1112.55	1707.38	1420.86	1357.59	1309.44	1728.65	1918.55	1023.48	1102.5	1148.67	912.849	941.251	895.684	977.503	1726.05	1802.97	1483.63	1333.82	1441.86	1303.03	1424.07	1272.02	1546.03	1667.05	1652.36	1760.01	1738.08	1585.85
CUL3	1651.8	2650.13	1992.26	1486.56	1463.66	1428.71	1590.6	1844.44	1369.34	1457.43	2231.03	1718.03	1579.16	1676.36	1673.85	1860.34	1901.24	2775.14	2393.58	2210.47	2052.29	1794.75	1742.21	3863.11	4153.39	3207.54	2703.98	2792.72	2816.34	1809.22	2431.31	2554.91	2574.94	3907.28	4077.15	3720.77	2196.49
MYOM2	135.163	299.682	167.991	139.313	137.815	89.163	103.394	59.433	90.1581	135.642	83.5867	80.0973	73.8583	78.5427	40.6533	33.7609	117.486	346.687	24.6761	44.0063	78.934	103.933	88.4223	1428.82	1331.27	161.282	177.789	172.358	200.693	235.364	190.422	127.456	133.223	983.396	1021.72	1060.4	202.876
OTC	0	2.93805	0	0	0	0	0	0	0	0	0	0	0	0	0	0	1.12967	0	0	0	0	0	0	3.52795	2.02013	0.822868	2.37053	2.62474	0.73784	0	0	3.31055	0.704884	2.50547	0.973997	0	0
CYP46A1	235.219	317.31	214.421	201.045	156.928	86.016	176.501	75.5504	232.29	106.782	92.1912	88.2231	60.9624	79.715	42.4208	26.7759	274.51	285.894	229.488	291.119	164.57	194.346	228.343	189.628	216.154	37.8519	50.5712	81.3668	127.646	54.6806	66.267	57.9346	33.8344	204.196	169.475	180.245	147.638
ZZZ3	1173.46	1016.57	1245.16	1201.26	948.61	975.548	1055.88	1314.58	888.853	923.517	1355.83	1189.85	1123.12	942.512	1207.23	1185.12	797.549	1325.96	757.556	784.215	773.703	765.556	814.262	1606.1	1643.38	1542.88	1461.03	1555.59	1443.22	1546.11	1291.06	1671	1929.97	1649.85	1763.91	1811.81	1630.04
SLC18A1	1.75537	0	4.22089	4.17106	8.04759	3.14693	10.4439	16.1174	7.42478	1.443	1.22922	12.7691	10.5512	8.20595	10.6052	3.4925	3.38902	0	1.2338	0	1.48932	2.53495	0	2.64597	2.02013	4.11434	2.37053	5.24947	2.21352	3.16989	2.28507	5.79346	4.93419	0	2.92199	0	1.00434
USP2	1813.29	2265.24	1884.2	951.835	1191.04	928.344	750.914	454.31	1074.47	1353.53	902.245	645.422	549.834	570.9	592.124	472.652	2388.13	2070.27	1494.14	1579.71	2153.56	2259.49	2023.02	10194	10566.3	67.4752	271.03	697.305	638.232	1408.22	842.428	387.334	409.538	9478.18	9559.78	7594.87	2413.42
CASR	7.89915	2981.15	3.37671	3.33685	2.0119	3.14693	1.04439	12.0881	0	1.443	3.68765	5.80415	11.7235	4.68911	7.07014	0	4.51869	834.679	1.2338	1.12837	5.95729	1.68997	1.94335	3237.78	3958.45	0.822868	0	0.874912	0	9.50968	1.52338	0	0.704884	3830.86	4076.18	2978.73	137.594
TUBG2	1716.75	835.387	1472.25	1448.19	1681.95	1427.66	1309.66	925.744	1324.79	1258.29	668.694	604.793	806.58	956.579	466.629	440.055	1006.54	1059.78	1020.36	1139.65	1169.12	1602.94	1479.86	1046.92	1052.49	798.182	1046.98	1127.76	1066.92	1364.64	1185.95	993.992	843.747	1359.22	1318.79	1314.38	1485.42
RPL26L1	658.262	761.936	770.734	712.416	629.724	518.194	533.682	529.86	746.721	828.28	1280.84	704.624	690.517	617.791	1018.1	1187.45	814.494	888.9	845.156	706.357	747.639	626.979	663.653	859.057	916.129	996.493	1093.6	1291.37	1119.3	989.006	1105.97	1006.41	1026.31	895.705	902.895	841.534	666.88
FLT4	1777.31	1405.37	1459.58	1980.42	1446.55	1304.93	1548.83	560.08	2023.78	1109.66	1562.33	755.701	733.894	774.876	250.99	445.876	4494.97	2607.55	2547.81	2055.88	3655.54	5217.78	4405.57	1896.28	1549.44	308.575	741.185	1133.01	2000.28	855.078	962.013	276.431	176.926	1777.63	2051.24	2235.51	5602.2
NSUN2	2255.65	1775.56	2278.44	2311.6	2315.7	2144.11	1913.32	2200.03	2134.09	2261.17	2379.76	1985.02	2140.72	1992.87	2326.08	2154.87	2739.46	1896.1	3367.05	3505.83	3094.07	2864.5	2972.35	2062.97	2050.43	2289.22	2637.61	2929.21	2887.91	2340.17	2728.37	1785.21	1718.51	1785.15	1723.97	1750.95	1975.53
FBXO42	1410.44	860.85	1429.19	1350.59	1355.01	1379.4	1496.61	1449.56	1506.17	1331.89	1735.65	1201.46	1188.77	1310.61	1341.56	1108.29	852.903	854.396	1099.32	996.348	848.913	984.407	912.401	977.243	910.069	836.034	798.867	721.802	769.567	817.832	761.689	799.497	830.354	939.55	983.737	1007.73	1352.84
MFAP3	1205.94	823.635	1332.96	1061.12	833.932	831.838	979.635	961.001	910.066	875.898	1436.95	1033.14	960.158	866.314	973.911	1071.03	2149.77	913.546	2320.79	1595.51	1687.4	1373.1	1443.91	1170.4	1324.2	816.285	755.408	824.167	899.427	858.248	755.596	775.496	821.895	1051.04	1100.62	1111.9	1581.83
MRI1	866.273	777.605	813.787	755.795	686.057	764.704	744.648	718.233	585.497	447.329	533.48	533.982	577.971	565.038	592.124	678.71	579.522	363.118	558.913	713.128	831.786	872.869	872.563	530.075	574.727	652.534	642.413	645.685	633.805	730.66	681.712	743.218	718.277	600.059	612.644	497.43	801.462
METTL1	441.475	307.516	430.531	521.382	598.54	451.06	383.29	342.495	670.352	722.941	817.429	704.624	813.614	718.607	809.531	915.036	314.049	391.05	438	442.32	317.225	312.644	281.785	722.349	592.908	692.855	772.001	824.167	831.546	576.128	687.044	646.384	571.661	636.389	618.488	688.209	343.484
HOXC8	1067.26	884.355	777.488	1061.12	1245.37	1203.18	1064.23	573.176	1201.75	1259.74	889.953	2296.12	1595.57	1875.65	855.487	1607.72	422.497	706.52	181.369	282.092	308.29	566.985	600.494	350.149	332.311	202.425	345.307	197.73	273.739	217.93	278.017	248.291	156.484	489.819	440.247	369.854	560.42
AGA	557.329	769.77	707.421	620.653	561.32	588.476	581.724	616.491	619.439	551.224	1157.92	652.387	572.109	581.45	671.663	874.29	776.085	882.328	692.164	619.473	724.555	679.368	615.069	1296.52	1247.43	995.67	912.653	932.656	959.192	1328.18	963.537	875.64	950.184	819.288	894.129	889.521	948.095
PI4K2B	1094.47	734.514	1257.82	1000.22	900.325	872.748	854.309	1010.36	747.782	1008.65	1414.83	806.777	691.689	599.034	1069.36	1072.2	952.314	611.222	1100.55	1042.61	1043.27	915.118	973.617	1213.62	1179.76	1174.23	930.036	948.405	812.362	743.34	750.264	930.264	1073.54	1133.72	1066.53	1122.44	954.121
BOD1L1	5526.77	7386.27	4490.18	5109.54	5483.43	5056.07	4580.68	4508.85	6127.57	5366.5	4207.61	4317.13	4016.48	4213.17	3554.51	3413.34	6093.45	7558.12	5484.26	5286.4	4478.39	5271.01	5070.19	3588.81	3378.67	2714.64	2959.21	2391.13	2670.24	2501.04	2927.93	2601.26	2283.83	3253.35	3609.63	3663.42	4559.69
MAT2B	3198.28	2803.88	4121.28	3339.35	3199.92	2311.94	2223.5	3295.01	3149.17	3588.73	5741.67	3351.32	2678.83	2356.28	3515.63	3489.01	3462.45	3816.85	4165.32	3374.94	3228.1	3058	3142.39	5533.6	5767.47	2961.5	2925.23	3005.32	3061.3	3384.65	2717.71	3311.37	3243.17	5394.27	5556.65	5332.45	5240.63
TLL1	71.97	143.965	130.003	297.813	66.3926	37.7631	168.146	38.2789	161.224	56.2768	68.8361	73.1323	111.374	12.8951	12.3727	53.5517	523.038	65.7227	320.789	269.68	349.991	414.042	290.53	119.068	150.5	118.493	221.249	236.226	306.204	673.602	188.137	79.4531	98.6838	171.625	116.88	101.827	1753.57
EDC4	1765.02	715.906	1690.04	1536.62	1269.51	1573.46	1530.03	1567.42	1092.5	966.807	1360.74	1020.37	1084.43	1188.69	1336.26	1287.57	797.549	568.502	832.818	1043.74	1141.56	1006.38	935.721	944.61	886.837	1217.02	1236.62	1418.23	1294.17	1294.11	1157.77	1323.39	1311.79	876.914	891.207	902.396	1149.97
TRIO	4650.84	1614.95	4850.65	3522.87	3057.08	4212.69	4194.26	3989.06	2963.55	3024.52	3111.15	2236.92	2444.36	2491.09	2444.5	2271.29	3440.98	1220.8	4836.51	4665.8	3979.47	4246.89	4547.43	1575.23	1618.12	2253.83	2820.14	3127.81	3056.87	2765.73	2902.04	1921.77	2012.44	1369.24	1509.7	1427.92	2659.49
VCAN	992.66	492.614	482.87	820.864	604.575	3722.82	8264.23	13579.9	1042.65	813.85	583.878	1451.04	2397.46	1771.31	10096.2	8591.56	17607.1	307.254	19133.8	17355.4	16716.9	14478.8	12978.6	326.336	467.66	16047.6	10232.8	15272.5	15109.5	16949.4	12726.3	13023.7	14709.5	248.041	246.421	200.142	1602.92
CLEC16A	3494.94	1573.82	3820.75	3596.28	3787.4	3417.56	2448.04	1950.21	3996.65	3929.28	3527.85	2283.35	2539.32	2447.72	2198.81	2098.99	814.494	1422.9	748.919	726.668	736.469	786.681	760.82	1440.29	1347.43	1136.38	1168.67	1470.73	1679.32	1344.03	1516.52	1286.98	1132.75	1339.17	1443.46	1240.65	818.535
MSR1	1709.73	159.634	2437.99	1994.6	2006.87	1839.9	2252.74	14001	2476.7	2422.79	2113.02	5921.4	5150.15	5107.62	8894.23	6610.15	1239.25	188.953	2097.47	1695.93	1428.26	790.906	1244.71	411.007	429.278	5131.4	3197.05	3526.77	2954.31	2681.73	1927.84	3231.09	3865.59	145.317	149.996	146.303	534.308
CDH1	2438.2	5875.13	3434.96	3829.03	4554.94	3181.54	1798.43	1446.54	6390.62	4763.33	6715.21	3090.13	2569.8	2743.13	2904.06	2059.41	1065.28	7163.78	470.079	866.586	1504.96	1240.44	757.905	4567.82	4303.89	5590.56	4351.5	4852.26	5731.54	11766.6	7502.64	4651.32	5916.8	4942.03	5469.97	5715.17	260.123
SKIV2L2	1505.23	1567.94	1747.45	871.751	855.057	826.593	1042.3	1302.49	794.452	920.631	1113.67	1042.43	921.47	915.55	1154.2	1090.83	2383.61	1763.01	3121.52	3255.34	2540.04	2247.66	2242.62	2167.05	2154.47	1584.02	1496.59	1998.3	1896.25	1844.88	1648.3	1767	1877.81	2109.6	2276.23	2184.01	2111.12
DNAH5	617.889	332.98	633.978	319.503	299.773	275.881	368.669	207.512	319.266	316.016	320.825	212.432	188.749	286.036	249.222	140.864	465.425	440.342	653.916	811.296	559.24	507.836	547.052	358.969	326.251	150.585	163.566	195.105	138.714	202.081	195.754	125.801	155.779	130.284	165.58	163.859	92.3991
ZFYVE16	1504.35	1751.08	1763.49	1160.39	978.789	1129.75	1281.46	3053.24	934.462	890.328	870.285	1076.09	1186.42	1196.9	1403.42	1395.84	2197.21	1758.08	2180.13	2282.69	2248.88	2470.74	2368.94	1719	1709.03	1261.46	925.295	1103.26	1108.24	1248.94	874.419	984.888	1041.82	1585.96	1687.94	1920.66	1474.37
FAM65A	3975.03	3883.13	3135.28	3425.27	3856.81	3057.77	2597.39	3036.12	3815.28	3721.49	3363.14	4010.67	3922.7	5434.68	2900.52	3596.11	2385.87	10160.7	1735.96	1798.62	2118.56	2344.83	2038.57	5021.16	4300.86	2956.56	2848.58	3915.23	3933.43	4074.9	4049.9	2919.08	2744.11	6555.56	6625.13	6859.85	4387.95
C6	22.8198	267.363	15.1952	35.0369	13.0773	17.8326	21.9321	11.0807	16.9709	36.0749	68.8361	22.0558	55.1006	44.5466	28.2805	25.6117	390.867	87.0826	48.1184	295.632	463.924	776.541	501.383	285.764	298.979	745.518	659.006	3784.87	5365.57	13552.9	4666.11	1805.9	2087.87	75.164	70.1278	49.1578	58.2516
RAI14	2151.2	1843.14	1939.92	1762.69	1463.66	1508.43	2110.71	1324.65	1521.02	1487.73	1889.31	1280.4	1383.38	1351.64	1375.14	1624.01	3914.31	2619.05	3056.13	3012.74	3213.21	3170.38	3194.86	2316.98	2295.88	2481.77	2772.73	3050.82	2828.88	2624.67	2684.95	1615.55	1410.47	2678.34	2672.65	2668.56	2764.94
SOX30	2.63305	27.4218	9.28596	7.5079	4.0238	31.4693	38.6423	14.1027	12.7282	8.65797	24.5843	19.7341	15.2406	14.0673	3.53507	5.82084	11.2967	8.21534	3.70141	3.3851	2.97864	7.60486	9.71673	10.5839	22.2214	7.40581	3.95088	7.87421	5.16488	3.96237	3.04676	4.13818	6.34396	26.3074	16.558	23.4085	8.0347
PNKP	2407.49	2235.86	1890.96	2314.1	2261.37	2333.97	2137.86	1943.16	2253.95	2145.73	1819.24	1662.31	2096.17	2018.66	1760.46	1722.97	1427.91	1595.42	1084.51	1266.03	1422.3	1564.91	1416.7	1367.08	1341.37	915.029	1216.87	995.65	1123.73	952.553	1174.52	988.198	953.709	1327.9	1220.42	1233.63	1350.83
BEST2	6.14378	8.81416	4.22089	8.34211	16.0952	10.4898	3.13316	10.0734	7.42478	4.32899	1.22922	8.12581	8.20648	8.20595	1.76753	2.32834	7.90771	8.21534	1.2338	6.7702	8.93593	6.75988	7.77339	4.40994	0	1.64574	3.1607	1.74982	2.21352	1.58495	0.761689	9.10401	4.22931	5.01093	2.92199	1.17042	2.00868
PHLPP2	906.647	327.103	1103.34	885.098	913.402	883.238	712.272	559.073	1148.72	806.635	979.685	494.514	490.044	398.575	429.511	298.027	253.047	312.183	204.811	257.268	326.161	367.568	308.02	521.255	509.073	517.584	457.512	489.951	481.072	698.169	490.528	388.989	413.767	461.006	445.117	407.307	245.058
SPDL1	389.691	215.457	384.945	387.074	367.171	389.17	400	374.73	365.936	321.788	426.538	284.403	280.193	335.272	413.603	541.338	311.79	197.168	298.581	235.829	304.566	310.954	347.859	239.901	302.01	764.444	731.702	675.432	580.68	425.558	638.296	636.453	692.196	258.063	254.213	223.551	444.922
STAU2	1057.61	1214.4	1237.56	1013.57	1033.11	893.728	997.39	1316.59	840.061	1001.44	1403.77	1694.81	1601.44	1679.88	1880.66	2092.01	1078.84	1314.45	1165.94	1121.6	1210.07	935.398	1010.54	1596.4	1542.37	1193.16	1107.04	1151.38	1139.23	1414.56	1050.37	964.197	995.297	1565.92	1633.39	1647.96	1188.13
PQLC2	766.218	573.9	835.736	940.99	1053.23	773.095	528.46	674.917	1141.3	1464.64	1074.34	924.021	878.093	814.734	754.737	887.096	369.403	537.283	293.645	267.423	338.076	359.963	366.321	593.578	569.677	1063.97	1069.11	974.652	1021.91	977.912	1174.52	1036.2	1050.98	571.247	545.438	527.861	844.648
CTNS	780.26	985.228	788.462	809.185	899.319	793.026	740.47	1089.94	817.787	949.491	835.867	903.126	1016.43	1024.57	980.982	860.32	722.99	680.23	607.032	619.473	626.26	648.948	578.146	1178.34	1222.18	975.098	884.206	763.798	831.546	911.344	814.246	863.225	936.086	1032.25	1092.82	1164.57	727.141
RTN4R	245.751	67.5753	220.33	266.113	345.041	283.224	242.298	155.13	445.487	448.772	406.871	313.424	283.71	271.969	236.85	323.639	54.2243	77.2242	59.2226	51.9049	40.2117	54.924	54.4137	84.6709	77.775	790.776	715.899	608.939	521.653	513.523	807.391	726.665	883.925	95.2078	78.8938	56.1803	111.481
PHF23	494.136	1610.05	585.859	553.082	557.296	616.798	603.656	897.539	585.497	666.664	762.114	871.784	806.58	735.019	1071.13	953.454	1007.67	1616.78	996.914	802.269	952.421	816.255	852.157	1833.65	1687.82	1583.2	1336.98	1344.74	1441	1212.48	1198.14	1377.19	1371	1527.08	1589.56	1526.23	1342.8
CDH10	1.75537	1.9587	0	12.5132	4.0238	1.04898	1.04439	3.02202	0	2.88599	7.3753	2.32166	1.17235	0	0	0	1.12967	44.3629	0	1.12837	0	0	0	19.4037	12.1208	2.4686	0	0.874912	0	0	0	0	1.40977	13.7801	24.3499	21.0676	0
INPP4A	1052.34	645.393	1036.65	986.038	983.818	1169.61	1294	2849.76	823.09	857.14	705.57	1173.6	1369.31	1153.52	1292.07	1130.41	919.553	1086.07	695.865	696.202	1010.5	1041.02	1097.02	934.026	846.435	1158.6	1142.59	1130.39	1273.51	1169.69	1263.64	998.958	1177.16	776.695	889.259	1022.95	781.375
RAB27B	66.7039	15.6696	79.3527	45.0474	32.1904	74.4773	104.439	92.6752	40.306	33.1889	84.8159	112.601	141.855	123.089	201.499	257.281	105.06	44.3629	162.862	97.0395	137.762	96.3282	103.969	45.8634	41.4127	997.316	862.081	680.682	574.777	393.067	475.294	576.035	528.663	13.7801	32.1419	24.5789	27.1171
PSMA4	3471.24	3575.61	3250.93	3398.58	3366.91	3697.64	3513.32	3219.46	4175.91	4468.96	4412.89	5346.79	4123.17	4186.21	5122.31	6010.6	4212.55	3981.16	3938.3	3312.88	3534.16	3520.21	3472.76	3691.12	3738.25	8640.93	10021.8	9079.84	8336.86	7333.55	8623.08	7927.11	7932.77	3723.12	3591.13	4002.85	3340.43
MYO16	33.352	52.885	39.6764	45.0474	20.119	32.5183	10.4439	33.2422	33.9419	34.6319	40.5641	33.6641	60.9624	39.8575	58.3286	57.0442	0	67.3658	13.5718	2.25673	8.19127	6.75988	12.6318	32.6336	41.4127	68.298	81.3881	128.612	113.627	157.702	106.636	66.2109	49.3419	42.5929	31.1679	30.431	3.01301
LSG1	1146.25	1307.43	1089.83	1137.03	1094.47	1012.26	1000.52	1119.15	1062.8	1076.47	1248.88	1338.44	1382.21	1243.79	1442.31	1555.33	1230.21	1094.28	1380.63	1372.09	1105.82	1160.16	1166.98	1293.88	1285.81	1947.73	2047.34	1837.32	1850.5	1412.19	1831.1	1846.46	2046.98	1464.45	1365.54	1275.76	1047.52
PARP3	1399.03	1161.51	1506.86	1222.12	1178.97	1243.04	1466.32	996.258	1096.75	1215	1111.21	1289.68	1291.93	1090.22	1228.44	1415.63	491.407	918.475	641.578	528.076	703.704	683.593	681.143	1464.1	1468.63	1082.89	1254.8	1205.63	1108.97	1335.32	1278.11	919.505	936.086	1600.99	1472.68	1295.66	664.872
TNC	466.928	1357.38	536.897	418.774	267.582	654.561	3180.16	5485.97	130.464	290.042	328.201	724.358	1213.39	553.316	961.539	2182.81	2372.31	1445.9	3295.49	2292.84	2042.6	3225.31	4194.71	1278.88	1063.6	20143.8	15579.1	20922.6	22059.9	12120.1	10035.3	15144.1	14837.8	994.67	984.711	868.454	1624.01
THAP3	679.327	470.089	558.846	700.737	769.551	629.386	567.102	431.141	947.19	1012.98	770.719	691.855	663.552	600.207	613.334	575.099	510.612	616.151	409.623	462.63	410.308	446.997	445.998	652.671	649.472	752.101	764.1	764.673	747.432	832.097	752.549	720.872	709.114	742.871	723.68	716.299	866.743
FAM65C	14304.5	1738.35	7253.18	6028.84	6426	3614.77	2270.5	3782.56	4780.5	4132.74	3258.65	6942.93	7247.49	10879.9	4535.49	4849.92	933.109	749.239	1223.93	2469.99	1167.63	1264.94	818.149	636.796	734.317	42.7891	76.647	88.3661	106.249	104.606	111.968	87.7295	57.8005	548.697	464.597	417.841	653.824
TDP1	254.528	337.876	288.709	269.45	248.469	322.036	337.337	521.802	274.717	303.029	277.803	427.186	423.22	389.197	413.603	462.175	271.121	358.189	351.634	255.011	340.31	250.115	315.794	383.665	467.66	398.268	391.927	368.338	409.501	378.01	345.807	356.711	324.952	440.962	470.441	466.999	575.486
AIFM2	1994.97	867.706	2080.9	2025.46	2450.49	1981.52	1761.88	1139.3	2479.88	2600.28	2872.68	1031.98	1147.73	1178.14	1509.47	1484.31	726.379	1127.15	1170.88	986.192	894.338	881.319	731.67	1117.48	1044.41	1255.7	1329.08	1544.22	1654.24	1267.96	1552.32	1075.93	1157.42	861.881	915.557	870.794	1047.52
C2orf83	0	0.979352	0	0	0	0	0	1.00734	3.18205	0	0	0	1.17235	0	5.3026	0	0	0	0	0	0	0.844985	0.971673	2.64597	0	7.40581	3.1607	4.37456	0.73784	0	1.52338	5.79346	0.704884	0	1.94799	0	0
SPATA7	476.582	635.599	438.972	356.208	423.505	366.093	401.045	486.545	334.115	352.091	296.241	220.558	341.155	369.268	295.178	215.371	366.014	430.484	330.659	331.74	403.606	362.498	407.131	662.373	619.17	128.367	99.5621	118.988	113.627	127.588	102.828	88.5571	114.896	724.08	704.2	726.832	504.178
MED17	832.921	844.201	769.046	663.198	707.182	711.206	731.071	734.35	580.194	590.185	663.777	762.666	682.31	711.573	712.316	755.545	1119.51	782.101	1263.42	1307.78	1081.25	999.617	1042.61	778.796	877.747	745.518	789.385	892.41	991.657	1030.21	831.003	738.252	926.923	818.035	809.392	773.649	1212.24
RETSAT	2683.08	1995.92	3372.49	2516.82	2295.58	2068.58	1980.16	2051.95	2175.46	2304.46	3815.49	3285.15	2778.48	2576.67	4045.89	3697.4	1750.99	2242.79	1458.36	1584.23	1694.85	1660.39	1650.87	5658.84	5524.05	1644.91	1540.84	1578.34	1544.3	1874.99	1469.3	1320.91	1265.27	4466	4153.12	4178.41	4511.49
CAPG	7850.88	7488.12	8586.13	8742.53	8552.58	9233.09	8852.22	12136.4	11750.2	11181.8	13758.6	14753	13733	11953.7	18210.9	17920	5870.91	6963.32	7289.31	5420.67	5761.44	4169.15	4549.37	4173.57	4396.81	13197.2	11163.6	9193.58	8437.94	7140.97	8626.13	9681.7	9910.67	4908.21	5313.15	6122.48	5704.64
AP2S1	1898.43	2833.26	1939.08	2305.76	2259.36	2195.51	2260.05	3171.1	2902.03	3154.39	3397.55	3418.65	3620.23	3146.4	4908.44	5719.56	3566.38	3238.49	3792.71	2679.87	2657.69	2531.57	2611.86	3296.87	3322.1	4300.31	3623.74	3497.02	3737.16	2784.75	3143.49	3471.94	3377.81	3318.49	3267.76	3284.21	3067.25
USH2A	44.7618	13.7109	21.9486	29.1974	36.2142	74.4773	56.3969	29.2128	44.5487	28.8599	35.6473	44.1116	32.8259	60.9585	33.5832	52.3876	83.5957	16.4307	99.9381	104.938	81.9127	86.1884	82.5922	80.2609	129.288	31.269	21.3347	40.246	21.3974	22.1892	35.7994	38.8989	28.1954	30.0656	17.5319	10.5338	16.0694
ZPBP	0	9.79352	0	0	0	3.14693	5.22194	5.03669	0	0	1.22922	0	0	0	0	2.32834	1.12967	9.85841	0	0	0	0	0	7.9379	7.07046	1.64574	2.37053	1.74982	0	1.58495	2.28507	3.31055	0	10.0219	7.79198	7.02254	0
TG	52.661	122.419	75.976	59.229	71.4224	90.212	75.1959	187.365	73.1871	98.1237	57.7732	232.166	328.259	302.448	314.621	487.786	96.0221	106.799	51.8198	60.9318	66.2748	90.4134	81.6206	457.752	484.831	37.8519	42.6695	42.8707	61.9786	52.3032	40.3695	31.4502	26.7856	341.996	334.081	335.911	27.1171
ADAM28	1083.06	201.746	1090.68	1352.26	1620.58	1439.2	1714.88	6023.89	1033.11	1105.33	662.548	1848.04	2400.98	2305.87	2359.66	1422.61	529.816	220.171	719.308	901.565	796.042	675.988	1274.84	321.044	311.1	617.974	677.97	744.55	948.862	771.076	719.035	412.163	379.933	476.039	407.131	489.237	451.952
BARX2	1718.5	152.779	1711.15	1664.25	1737.27	1487.45	1111.23	948.913	1458.44	1852.81	2782.95	1701.78	1511.16	2077.28	2182.9	1551.84	2083.12	438.699	1375.69	1926.12	3222.15	1995.85	2036.63	338.684	329.281	1416.98	1681.49	1794.44	1657.93	1966.13	1537.85	1613.06	1748.82	440.962	558.1	690.549	1696.33
DCUN1D1	1011.09	1472.94	1243.47	880.927	830.914	779.389	859.531	1058.71	830.515	847.039	1123.5	985.545	859.335	827.629	1092.34	1102.47	816.753	1436.04	699.567	682.662	863.806	817.1	859.931	1504.67	1519.14	891.166	871.563	836.416	890.573	949.383	826.433	902.124	996.707	1213.9	1271.07	1260.55	716.093
JADE2	3301.84	1256.51	3711.85	2354.98	2250.31	2059.14	1912.27	2193.98	2416.24	2743.14	2823.51	2249.69	2015.28	2010.46	1718.04	1790.49	2600.51	1519.84	2328.19	2896.52	3216.19	2651.56	2654.61	2501.32	2485.77	2062.11	2334.18	2615.99	2673.19	2846.56	2742.84	2639.33	2572.12	2771.05	2695.05	2516.41	4213.2
ZIC2	3.51073	43.0915	0	0	0	0	3.13316	7.05137	0	0	1.22922	12.7691	22.2747	36.3406	31.8156	93.1334	3.38902	0	3.70141	3.3851	2.23398	1.68997	1.94335	0.881988	1.01007	281.421	226.78	170.608	151.257	79.2473	168.333	215.186	210.056	0	0	0	0
LCP2	1076.92	209.581	1090.68	1101.99	1187.02	1694.1	1640.73	6739.1	1291.91	1077.92	878.89	2795.28	2704.62	2613.01	5811.65	2514.6	1540.87	236.602	1453.42	999.733	1578.68	1243.82	1605.2	282.236	348.473	4189.22	3699.6	2814.59	3199.27	2543.05	2043.61	3122.67	3309.43	156.592	196.747	172.052	1052.55
TRIT1	911.913	649.31	853.464	885.932	825.884	850.72	844.909	759.534	764.753	681.094	794.074	663.995	825.337	897.965	882	1078.02	553.539	483.062	632.941	670.25	566.687	572.055	640.333	429.528	403.016	551.321	546.801	574.817	558.545	481.031	527.089	585.967	654.133	595.048	582.45	635.539	730.154
ADRB1	15.7983	50.9263	22.7928	21.6895	14.0833	8.39181	11.4883	29.2128	15.9102	20.2019	15.9798	20.8949	21.1024	46.8911	19.4429	5.82084	3.38902	184.024	16.0395	7.89857	11.9146	8.44985	9.71673	149.938	101.007	27.1546	44.2498	34.9965	33.9406	34.0763	35.7994	28.1397	21.8514	85.1859	134.412	127.576	1.00434
GUCA2B	28.9635	0	16.8836	0.834211	8.04759	1.04898	0	5.03669	0	8.65797	3.68765	4.64332	4.68942	11.7228	5.3026	1.16417	61.0023	0	12.338	15.7971	23.8291	92.1033	20.4051	0	2.02013	0	0	0	0	0	0	0	0	2.50547	0	1.17042	119.516
CUL7	1727.28	1331.92	1638.55	1803.56	1861.01	2103.2	2302.87	1629.87	1753.31	1594.51	1674.19	1545.07	1593.23	1712.7	1283.23	1445.9	1488.91	1186.3	1884.02	2043.47	1994.2	1777.85	1684.88	1589.34	1550.45	2285.1	3021.63	3159.31	2976.45	3306.2	3699.52	2992.73	3021.84	1704.97	1721.05	1525.06	2138.24
CTNNA1	17517.7	12998.9	22558.1	13626.8	11437.6	10671.2	12461.6	9871.92	11860.6	14795	21725.2	13596.8	11747	11721.6	16247.2	18908.4	15162.5	12009.2	15437.4	14388.9	13532	13441.2	12776.5	16728.7	16590.3	8385.84	7060.22	8791.12	9480.51	10134.9	8377.06	8634.73	8739.86	17404.2	18003.4	16552.1	23357.9
PHKA2	6455.36	994.042	6320.36	5863.67	5677.58	4830.54	3951.96	3049.21	4830.35	4393.92	4655.04	2423.81	2492.42	3119.43	2479.85	1717.15	4121.04	744.31	3643.42	5102.47	5589.42	5580.28	4965.25	1027.52	885.827	2183.89	2259.9	2731.48	2615.64	1593.66	2245.46	2373.66	1958.87	959.594	903.869	807.592	6011.97
CNTLN	323.865	466.171	319.099	304.487	288.707	375.533	358.225	618.506	363.814	352.091	256.906	350.571	357.568	398.575	401.23	288.714	937.628	630.938	954.964	972.652	927.847	872.024	837.582	412.771	442.409	617.974	523.886	530.197	480.334	515.9	488.243	608.313	688.672	383.336	429.533	379.217	1017.39
EPHA3	142.185	75.4101	92.8596	97.6027	182.077	353.505	461.619	91.6678	307.598	82.2508	108.171	95.1881	216.885	151.224	54.7936	152.506	1235.86	54.2213	312.152	294.504	980.718	1012.29	1133.94	45.8634	59.5939	67.4752	152.504	101.49	163.801	69.7376	53.3182	106.765	49.3419	73.9113	46.7519	40.9648	356.54
HSPA5	12894	15593.2	15969.3	14273.4	10852.2	10711.1	13415.2	17091.5	10228.2	12445.8	26771.1	20383	17601.7	18677.9	35462	43233.7	18019.4	20153.9	26118.4	20378.3	16541.1	12521	13243.9	17082.4	17115.6	26839.5	21789.1	22786.2	23333.5	16790.1	18412.3	26863.4	27984.6	17788.8	18510.8	16868.1	15436.7
DSG2	1636	3174.08	1787.12	1169.56	1104.53	709.108	671.541	914.664	1491.32	1317.46	2571.52	3062.27	2036.38	2684.52	2135.18	3195.64	4944.58	7050.41	6049.34	6883.04	7185.98	4598.41	3673.9	5899.62	5781.61	3054.48	2792.48	4056.97	3594.76	4268.26	3817.59	2232.96	2402.95	5408.05	7283.55	8414.17	3023.06
GEMIN8	875.928	607.198	775.799	804.18	800.736	589.525	613.055	495.611	712.779	696.967	706.799	537.465	533.421	502.908	479.002	469.16	743.324	683.517	734.113	838.376	775.192	741.052	750.132	592.696	622.2	520.875	566.556	645.685	562.234	699.754	559.842	613.279	604.791	739.113	687.642	667.141	795.435
OFD1	3903.06	2906.72	3038.2	3229.23	3712.96	2979.09	2319.58	2020.72	3797.25	2937.94	1853.66	2005.92	1781.98	2123	1332.72	1138.56	1972.41	1953.61	2230.72	2889.75	2312.17	2552.7	2316.47	1100.72	969.663	1325.64	1910.64	1980.8	1835.01	2173.75	2234.03	1769.49	1585.99	983.396	1030.49	1051.04	2132.21
GPM6B	216.788	792.295	222.019	208.553	164.976	216.089	249.609	173.262	159.102	116.883	90.962	100.992	80.8924	105.505	77.7715	76.8351	198.822	839.608	214.682	99.2963	116.167	130.973	173.93	305.168	410.087	46.9035	39.5088	62.1188	90.7543	41.2086	49.5098	76.9702	62.0298	324.458	314.601	330.059	86.373
MAGEC2	0	0	0	0	0	0	0	0	0	0	0	0	0	0	0	0	0	0	0	0	0	0	0	0	0	0.822868	0	0.874912	0	0	0	0	0	0	0	0	0
PREX2	4841.3	167.469	3504.18	5336.45	4830.57	4334.37	3604.18	3604.26	3888.46	2220.77	3277.09	4250.96	3235.7	6066.54	3289.38	3984.95	2222.07	395.98	5953.1	2901.03	4681.68	4148.03	2783.84	404.833	390.895	1932.09	2307.31	3245.92	2758.05	1714.91	2837.29	2939.77	3270.66	319.447	391.547	449.442	924.995
WDR37	1027.77	866.726	1126.13	979.364	1017.01	997.576	927.416	1397.18	818.847	842.71	948.955	754.54	926.16	826.456	639.847	646.113	759.14	833.036	721.775	674.763	732.002	807.805	876.449	1218.91	1098.95	722.478	734.073	708.679	795.392	1059.54	798.25	836.741	792.995	1062.32	1104.51	1110.73	805.479
YTHDC2	2454.88	1397.53	2768.06	1443.19	1293.65	1379.4	1713.84	2124.48	1057.5	1268.39	1470.14	1136.45	1223.94	1188.69	1380.44	1102.47	1878.64	1275.02	2108.57	2293.97	2157.28	2403.98	2213.47	1276.24	1297.93	759.507	764.1	860.039	917.873	874.89	875.181	919.505	964.987	1082.36	1111.33	1047.53	1421.14
CTPS2	599.458	745.287	557.157	629.829	541.201	470.99	543.081	535.904	487.914	471.86	586.336	535.143	555.696	756.12	487.839	485.458	732.028	593.148	861.195	1007.63	823.595	808.65	712.237	558.299	647.452	839.325	642.413	645.685	636.756	812.285	645.912	747.356	706.999	745.377	626.28	694.061	804.475
ATP6V1H	1768.53	3709.78	2288.57	1886.15	1809.7	1680.46	1579.11	2116.42	1806.34	2197.68	2923.08	3607.86	3502.99	3421.88	4240.31	5322.58	1422.26	4976.85	1464.53	1278.44	1384.32	1131.43	1302.04	4821.83	4657.41	1350.33	1155.24	1140.89	1159.15	1236.26	1102.16	1057.72	1146.85	4810.5	5249.84	5346.49	1674.23
POLR2B	1847.52	1850	2071.61	1886.15	1584.37	1682.56	2014.62	2512.3	1372.52	1354.97	2254.38	1915.37	1627.23	1726.77	1986.71	2014.01	1949.81	2114.63	2463.91	2450.81	2150.58	1795.59	2002.62	2967.89	3118.07	4086.36	3397.75	3525.9	3366.03	3026.45	2744.37	3626.7	3749.28	2867.51	2872.32	2806.67	1963.48
FAM214A	1281.42	756.059	1280.62	1018.57	1079.38	1047.93	1190.6	1271.26	833.697	740.257	910.849	1006.44	1009.4	949.546	738.829	825.395	1253.94	842.894	867.364	765.033	1206.35	1395.91	1384.63	1275.36	1237.33	529.927	711.948	722.677	895	1117.39	792.157	721.699	764.8	1146.25	1146.39	1227.77	1658.16
ARAP2	812.735	606.219	1007.95	715.753	675.998	834.985	785.379	1793.06	660.806	699.853	755.968	774.274	810.097	643.581	783.018	608.86	651.821	366.404	590.992	620.602	748.384	615.149	763.735	497.441	521.194	932.309	956.112	933.531	917.873	923.231	804.344	950.127	1018.56	473.533	489.921	488.066	846.657
TPR	2256.52	2388.64	2692.08	2360.82	1909.29	2463	2668.41	3320.19	2154.25	1999.99	2905.87	2680.36	2404.5	2468.82	3068.44	2946.51	3044.47	2888.51	3787.78	3411.05	3528.2	2925.34	2854.78	3298.64	3273.62	4897.71	4330.16	4779.64	4708.16	4421.21	4455.12	5412.74	5615.11	2799.86	3244.38	3415.29	3466.97
CP	17940.7	89.121	20962.6	22461.1	14273.4	14786.4	18519.1	23779.2	15822.2	11194.8	51496.8	45252.7	29576.1	40661.7	83754.6	90813.2	7303.33	75.5812	42541.6	34658.9	7752.66	4001.85	7068.92	134.944	243.426	220.529	75.8568	176.732	288.495	63.3978	31.2293	128.284	198.777	33.8238	27.2719	21.0676	3161.66
KIAA0556	2566.35	1120.38	2356.1	2513.48	2399.19	2242.71	2048.04	1755.79	2301.68	2479.07	2489.16	1729.64	1907.42	1859.23	1447.61	1607.72	877.755	716.378	856.26	910.592	873.487	824.705	883.251	971.069	879.767	1117.45	1208.18	1164.51	1133.32	1367.02	1398.46	1190.14	1263.15	864.386	892.181	811.103	601.598
DTNBP1	493.258	705.133	413.647	444.635	441.612	393.366	503.395	797.812	494.278	539.68	583.878	622.205	661.208	521.664	579.751	600.711	1386.11	984.198	1489.2	1420.61	1154.22	1067.22	974.588	1187.16	1231.27	996.493	1023.28	1147.01	1171.69	1045.27	1038.94	983.233	954.413	1272.78	1265.22	1247.67	1348.83
XK	57.9271	76.3894	126.627	117.624	75.4462	88.114	86.6841	51.3743	152.738	105.339	213.884	130.013	147.717	139.501	160.846	160.655	24.8528	116.658	27.1437	29.3375	11.1699	25.3495	45.6686	219.615	209.084	76.5267	33.1874	26.2474	27.3001	50.7183	48.7481	97.6611	119.125	150.328	213.305	193.12	2.00868
ANO2	214.155	62.6785	270.137	262.777	191.13	164.689	185.901	48.3523	145.314	206.348	157.34	54.559	82.0648	85.5763	37.1182	41.91	131.042	54.2213	62.924	91.3977	138.507	202.796	137.978	50.2733	40.4026	7.40581	5.53123	13.9986	15.4946	7.92473	12.187	16.5527	5.63907	28.8129	31.1679	33.9423	160.694
C12orf4	864.518	448.543	1018.08	899.28	822.866	810.859	882.507	984.17	781.724	737.371	1060.81	775.435	790.167	720.951	945.631	883.603	534.335	522.496	762.491	684.919	628.494	663.313	638.389	479.802	504.023	783.37	713.528	685.056	681.026	471.521	584.216	637.28	703.475	435.951	481.155	514.986	543.347
SCML1	726.722	1366.2	757.227	494.687	472.796	624.141	766.58	1005.32	351.086	337.661	232.322	378.431	502.94	589.656	479.002	548.323	473.333	688.446	645.28	684.919	578.601	807.805	867.704	612.1	487.862	203.248	128.799	202.105	227.993	152.947	142.436	120.835	158.599	408.391	501.608	596.916	712.075
WWC3	2420.65	1195.79	2736.82	2207.32	2101.43	2676.99	3007.83	1834.36	2716.41	2191.91	3081.65	1829.47	1832.39	1699.8	1555.43	1710.16	2721.38	1692.36	2344.23	2073.94	2299.51	2611	2538.98	1535.54	1514.09	2905.55	3045.34	2952.83	2996.37	2879.85	2884.52	2933.14	2626.4	1534.6	1518.46	1619.86	2617.3
ARHGAP6	471.316	1151.72	473.584	367.887	400.368	309.448	428.199	442.222	353.208	327.56	360.16	273.956	310.674	279.002	293.411	202.565	828.05	745.953	494.755	432.164	681.365	801.89	848.271	1457.93	1453.48	323.387	278.142	427.832	390.317	599.902	388.462	351.746	321.427	1345.44	1426.91	1279.27	757.271
FAM184B	29.8412	51.9056	28.702	32.5342	33.1963	18.8816	38.6423	23.1688	25.4564	30.3029	15.9798	18.5733	10.5512	17.5842	21.2104	12.8058	19.2044	93.6549	16.0395	33.851	21.5952	12.6748	26.2352	81.1429	59.5939	9.87441	10.2723	4.37456	8.85408	4.75484	9.14027	10.7593	5.63907	23.8019	30.1939	44.4761	6.02603
MAP4	7174.18	9093.28	7286.1	8156.08	8392.63	7999.49	7830.81	6146.78	8210.75	9828.24	10756.9	10138.7	9200.63	8243.46	8717.48	8853.5	8770.78	10931.3	7666.86	6477.95	7134.59	7878.64	7979.38	11417.3	10770.3	7181.99	7574.62	7703.6	8511.72	8185.45	7936.04	7083.74	6888.83	12920.7	12706.8	12381.9	9589.42
GOPC	999.681	1310.37	963.207	1046.94	1051.22	1016.46	1002.61	1248.09	1038.41	810.964	1004.27	901.965	899.196	805.355	931.491	913.872	1808.61	1823.81	1665.64	1884.37	1569.74	1724.61	1805.37	1424.41	1554.49	1282.85	1173.41	1375.36	1418.13	1460.53	1260.6	1387.12	1448.54	1589.72	1647.03	1664.34	1210.23
ROS1	0	64.6372	0	0	1.00595	0	2.08877	1.00734	0	0	0	1.16083	2.34471	2.34456	0	0	0	21.3599	4.93522	0	0	0	0	27.3416	14.1409	12.343	3.1607	5.24947	1.47568	4.75484	0	3.31055	1.40977	7.5164	7.79198	7.02254	0
USP28	591.559	501.428	688.005	629.829	597.534	666.1	767.625	859.26	516.553	471.86	710.487	605.954	579.143	581.45	714.084	562.293	504.963	616.151	574.953	558.541	551.049	536.565	582.032	650.025	596.949	606.453	657.426	650.935	554.118	679.942	559.08	646.384	741.538	779.2	885.363	840.363	603.607
HDAC9	113.221	255.611	122.406	109.282	170.005	229.726	239.165	229.673	88.0367	119.769	94.6497	161.355	164.13	140.673	120.192	71.0142	321.957	272.749	320.789	397.185	361.905	487.556	421.706	271.652	271.708	725.769	464.623	317.593	315.796	425.558	280.302	486.65	639.33	235.514	194.799	232.914	424.835
TSPAN17	2326.74	1887.21	2504.68	3160.83	3683.79	2622.44	1689.82	2090.23	4310.62	4365.06	4149.83	2799.92	2687.04	2596.6	2554.09	2305.05	1581.54	1621.71	1784.08	1565.04	1726.87	1603.78	1617.84	1736.64	1779.74	2935.17	2771.94	2977.33	2708.61	2615.95	2958.4	2871.9	2942.89	1389.28	1498.98	1560.17	962.156
NOP16	651.241	338.856	620.471	590.622	633.748	486.725	419.844	389.84	603.529	759.016	715.404	495.675	507.629	459.533	567.378	856.828	490.278	338.472	618.136	596.906	520.518	519.666	434.338	435.702	452.509	980.035	885.787	1048.14	997.56	633.978	1017.62	1003.92	945.955	491.072	466.545	526.69	654.828
CC2D2A	2176.65	1135.07	2459.09	1875.31	1695.02	1121.36	947.259	784.717	1238.88	1805.19	2196.61	1093.5	932.021	927.272	1095.87	748.56	1321.72	1099.21	745.218	1044.87	1209.33	1419.57	1154.35	2030.34	2077.7	274.838	242.584	287.846	263.409	213.175	217.081	288.018	352.442	1970.55	2045.39	2040.05	1265.47
RRM2B	1724.65	1488.61	2877.8	1680.1	1532.06	1901.79	2368.67	2815.51	1658.91	1679.65	2475.64	4919.6	2847.65	3949.41	6025.52	7251.6	1750.99	1754.8	2245.52	1963.36	1869.84	1542.1	1601.32	2032.98	2194.87	1296.84	1128.37	1226.63	1099.38	1210.9	990.196	1094.14	1273.02	2236.13	2106.76	2144.21	1832.92
ZNF800	613.501	651.269	693.07	584.782	569.367	713.304	733.16	956.972	523.978	536.794	711.716	705.785	692.861	677.577	687.571	664.74	823.531	678.587	972.238	866.586	918.167	732.602	735.557	720.585	775.73	1286.97	1205.02	1068.27	1081.67	1070.63	1010.76	1163.66	1127.11	677.729	727.576	703.424	718.101
TNFRSF17	43.0065	13.7109	17.7277	47.55	101.601	111.191	48.0418	41.3009	36.0632	41.8469	28.272	56.8807	116.063	24.6179	24.7455	20.955	4.51869	4.92921	0	0	5.21263	1.68997	16.5184	0.881988	8.08052	2.4686	14.2232	13.9986	98.8706	190.986	67.7903	10.7593	2.81954	0	0.973997	7.02254	0
SNX29	5391.61	2326.94	6257.89	7492.89	7606.99	4471.79	2416.71	3790.62	6476.53	8946.57	10300.8	3165.58	3722.22	3624.69	3602.23	2229.38	2220.94	2615.77	1782.85	2221.75	2440.25	1893.61	1923.91	4573.99	4305.91	2145.22	2093.96	2629.11	2788.3	3798.32	2341.43	1860.53	1868.65	4020.02	4198.9	4081.26	3247.02
LMO3	182.558	361.381	102.99	115.955	139.827	245.46	247.52	54.3963	181.377	138.528	83.5867	68.489	60.9624	60.9585	12.3727	44.2384	28.2418	478.133	11.1042	12.412	107.231	305.039	226.4	272.534	337.362	30.4461	31.607	24.4975	19.9217	22.9817	33.5143	26.4844	18.327	370.809	321.419	268.027	38.1648
MRPS10	743.398	1685.46	812.943	741.614	757.48	702.814	725.849	838.106	782.784	920.631	1035	1013.41	903.885	790.116	1155.97	1300.38	1302.51	1846.81	1273.29	1220.89	1089.44	1150.87	1034.83	2024.16	2103.97	2709.7	2304.15	2214.4	2031.27	1642.8	2068.75	2119.58	2234.48	1712.49	1867.15	1848.1	932.025
GUCA1A	1.75537	0	0	2.50263	0	4.1959	2.08877	3.02202	0	0	0	0	3.51706	0	1.76753	4.65667	1.12967	0	0	0	2.97864	0.844985	0	0	0	2.4686	0	4.37456	2.21352	0.792473	0	0	0.704884	0	0.973997	0	0
RSF1	3809.15	5892.76	3043.26	3842.38	3971.49	3831.91	3837.08	2914.23	4773.07	4399.69	3686.42	4719.94	3912.15	4351.5	3301.75	3724.17	5356.91	6491.76	4340.52	4405.14	3859.58	4120.14	4234.55	3477.68	3288.77	2774.71	3210.48	2923.96	3097.45	3601.79	3375.04	2824.72	2404.36	3513.92	3593.08	3610.75	4556.68
VPS13D	2147.69	3055.58	2318.11	1947.88	1733.25	1725.57	1878.85	2962.58	1586.78	1770.56	1997.48	1677.4	1750.32	1638.85	1753.39	1596.07	1183.9	3225.34	1019.12	955.726	1267.41	1165.23	1312.73	4186.8	3917.03	1871.2	1914.6	2343.89	2430.45	2437.65	2024.57	1907.7	1999.05	3242.07	3746.97	3733.65	1768.64
CELF2	782.016	282.053	968.272	1112	1149.8	1633.26	1551.96	4807.02	1211.3	1105.33	748.593	1994.31	2345.88	2199.19	2326.08	1795.15	885.663	685.16	1109.19	593.521	1277.84	997.082	1406.01	626.212	595.939	1556.87	1674.38	1274.75	1585.62	1366.22	1246.89	1464.09	1482.37	380.831	410.053	569.996	575.486
FAM120A	5460.07	4136.78	8082.16	5896.21	4649.5	4485.42	4497.13	6002.73	4663.82	5288.58	10085.7	6328.85	5685.92	5595.29	7851.39	7144.5	6554.36	4317.98	6725.47	7381.77	7190.44	5824.48	6070.04	7735.92	7514.89	6095.8	4537.98	4641.41	4632.16	4246.86	3985.16	6242.86	6476.48	7373.59	7645.88	7460.27	5910.53
R3HDM1	629.299	695.34	758.916	548.911	530.135	648.267	668.408	888.473	488.975	509.378	645.339	795.169	842.923	781.91	896.14	784.649	737.676	599.72	648.981	660.094	720.832	734.292	752.075	778.796	814.113	1757.65	1582.72	1447.98	1505.19	978.704	1323.82	1644.51	1596.56	836.826	857.117	863.772	644.785
COL9A2	96.5452	3715.66	97.9246	157.666	170.005	962.96	285.118	425.097	205.773	129.87	79.8991	203.145	325.914	236.8	229.779	365.549	107.319	3567.1	46.8846	53.0332	115.422	119.988	148.666	1276.24	1409.04	1128.97	982.188	582.691	548.215	1741.86	1044.28	1114	1517.62	1781.39	1764.88	1893.74	129.56
KITLG	559.084	4331.67	1661.34	190.2	191.13	420.639	280.94	227.659	146.374	137.085	328.201	62.6848	80.8924	93.7823	123.727	188.595	1276.53	3542.46	1216.53	1150.93	893.593	1351.98	1371.03	2306.4	2352.44	1978.17	1788.96	2327.27	2055.62	1753.74	1562.99	1375.53	1330.12	1823.98	2296.69	2379.47	3421.78
ERCC8	190.457	369.216	231.305	120.961	113.672	146.857	172.324	176.284	115.614	112.554	113.088	174.125	189.921	218.044	213.872	206.058	371.662	343.401	360.271	368.976	338.821	350.669	401.301	312.224	286.859	178.562	161.986	191.606	151.257	137.89	135.581	206.909	219.219	316.942	317.523	327.718	250.08
ADAMTS6	31.5966	222.313	16.0394	21.6895	26.1547	111.191	137.859	83.6091	29.6991	10.101	3.68765	29.0208	90.2713	36.3406	14.1403	46.5667	122.005	115.015	95.0029	46.263	89.3593	129.283	183.646	34.3975	43.4328	29.6232	71.1158	49.87	81.9003	61.8129	73.8839	53.7964	33.8344	90.1968	55.5178	46.8169	49.2125
H6PD	18244.4	3540.36	17007.6	20335.6	19678.4	15262.6	12685.1	8840.41	16787.4	23203.4	29293.5	12553.2	12540.7	13695.7	12551.3	12017.7	3047.86	2860.58	5627.38	4130.95	2815.56	2720.01	2821.74	2178.51	2278.71	7705.33	8742.5	10504.2	12077.7	14105.2	10754.3	11930.4	11390.2	2266.2	2553.82	2315.1	3761.24
VAMP3	2821.75	2384.72	3581	3133.3	2592.33	2502.86	2952.48	3933.66	2857.48	2805.18	4616.94	3776.18	3452.58	3297.62	4768.81	4941.89	2993.63	3463.59	3036.39	2328.95	2605.57	2530.73	2749.84	4289.99	4254.4	3867.48	3202.58	3105.06	3214.03	3234.88	2620.97	3356.89	3452.52	4682.72	4644.99	4390.26	5040.77
PER3	2243.36	794.254	2075.83	1700.96	1572.3	1189.54	780.157	1171.54	1430.86	1477.63	1476.29	616.401	390.394	615.446	613.334	455.19	812.234	624.366	880.936	1047.12	778.17	813.72	740.415	896.982	958.552	471.503	425.114	467.203	379.988	775.831	473.009	459.338	597.037	1121.2	1149.32	994.859	2259.76
UTS2	7.89915	0	4.22089	6.67369	7.04164	3.14693	8.3551	9.06605	8.48547	7.21498	2.45843	16.2516	15.2406	7.03367	21.2104	2.32834	2.25934	0	2.46761	1.12837	3.7233	0	2.91502	0	1.01007	9.05154	6.3214	9.62403	8.11624	6.33978	9.90196	13.2422	7.04884	2.50547	0.973997	1.17042	7.03036
TNFRSF9	34.2296	1.9587	25.3253	77.5816	75.4462	138.465	123.238	382.789	94.4008	113.997	124.151	578.094	323.57	248.523	256.292	302.684	61.0023	11.5015	40.7155	32.7226	113.933	54.924	92.309	2.64597	7.07046	330.793	415.632	348.215	385.89	290.045	265.83	236.704	192.433	8.76914	2.92199	1.17042	12.0521
EPN3	64.9486	727.658	123.25	55.8922	53.3153	76.5753	78.329	41.3009	59.3983	38.9609	14.7506	10.4475	36.343	36.3406	31.8156	24.4475	1.12967	1114	0	2.25673	9.68059	10.1398	9.71673	882.87	844.415	34.5604	37.9284	41.1209	31.7271	50.7183	75.4072	60.4175	55.6859	1015.97	1224.31	1357.69	6.02603
SRD5A2	3.51073	5.87611	10.9743	8.34211	4.0238	0	10.4439	4.02936	6.3641	5.77198	7.3753	10.4475	18.7577	10.5505	1.76753	11.6417	0	13.1445	0	1.12837	0	0	2.91502	20.2857	17.1711	1.64574	0.790175	3.49965	6.64056	6.33978	9.14027	0.827637	2.11465	27.5601	37.9859	15.2155	2.00868
LTBP1	1362.16	1057.7	1467.18	2213.16	799.73	722.745	1754.57	915.671	1067.05	826.837	2033.12	592.024	638.933	590.828	355.274	987.214	3461.32	883.971	2225.78	1798.62	1775.27	2835.77	2212.5	789.38	814.113	2472.72	1994.4	1912.56	2738.12	1618.23	1153.96	1997.09	1642.38	797.991	626.28	610.961	1476.38
RCN1	3767.89	2556.11	4693.63	5512.47	5287.27	4374.23	4983.82	3327.24	5949.37	6878.76	10125.1	5675.3	4696.45	4389.01	8828.83	11414.7	4297.27	2341.37	8218.37	5422.93	4225.95	3472.04	3746.77	1915.68	2026.19	13545.2	12725.8	11195.4	10146.8	9682.44	9554.63	11353.5	12514.5	1850.29	1878.84	1776.7	3429.81
ELN	284.369	1666.86	93.7037	382.903	232.374	1254.58	2555.62	121.888	188.802	141.414	142.589	77.7756	213.368	32.8238	24.7455	41.91	3359.65	1544.48	196.175	291.119	1319.54	7298.13	5136.27	805.255	906.029	135.773	465.413	333.341	700.21	1771.18	679.427	171.321	72.6031	1517.06	759.718	615.642	2343.12
RFC2	842.576	601.322	823.073	806.682	843.991	777.291	834.465	855.231	916.43	1093.79	1348.45	984.384	943.745	848.73	1249.65	1300.38	1250.55	599.72	2194.94	1923.87	1313.58	1088.34	1082.44	612.1	682.804	2962.32	2941.82	3724.5	3201.49	2065.18	2956.88	2528.43	2466.39	601.312	544.464	609.79	1219.27
ARID1B	1806.27	3107.48	1774.46	1720.14	1558.22	1816.83	1877.81	2372.28	1664.21	1463.2	1765.15	1805.09	1677.64	1719.73	1624.36	1499.45	2771.09	3632.82	2513.26	2482.41	2278.66	2453.84	2544.81	3019.05	2972.62	2072.8	2145.33	2296.64	2420.12	2785.54	2161.67	2449.81	2365.59	2927.64	3468.4	3216.32	1815.84
CLPTM1L	9427.2	3014.44	11756.9	9257.24	10246.6	6985.13	4061.62	4871.49	8745.33	12555.5	14920.2	5838.98	6501.88	5252.98	6905.76	6518.18	8297.44	3231.92	5592.83	6744.25	8725.93	8080.59	6102.11	8383.3	8358.29	5674.5	6187.86	7093.79	7328.23	7040.33	7201.77	4179.57	3996.69	6679.58	6407.93	6182.17	5775.95
NEDD4L	1336.71	6129.76	1449.45	1381.45	1756.39	948.274	699.739	1246.08	1593.15	2018.75	2070	1302.45	1310.69	1512.24	1392.82	951.125	2799.33	9064.81	2483.65	2913.44	2884.82	2729.3	2195.98	8393	8346.17	2521.27	2554.64	2931.83	2490.21	3458.35	2738.27	2143.58	2196.42	8383.29	9348.42	9565.86	3295.23
FOXP3	36.8627	43.0915	29.5462	68.4053	86.5116	267.489	160.836	314.29	99.7042	59.1628	54.0855	273.956	222.747	179.359	194.429	261.938	79.0771	9.85841	33.3127	15.7971	93.8273	75.2036	114.657	22.9317	20.2013	257.558	317.651	227.477	357.852	267.063	391.508	349.263	273.495	23.8019	12.662	24.5789	22.0954
PPP1R3F	424.799	456.378	544.495	362.048	349.064	281.126	308.094	277.018	354.268	418.469	352.785	294.851	362.257	407.953	371.182	272.415	305.011	552.071	313.386	315.943	323.183	321.939	326.482	436.584	407.056	214.768	223.62	228.352	284.068	370.877	289.442	228.428	274.905	425.929	383.755	466.999	353.527
HEXB	4141.79	2214.31	5181.56	3327.67	2731.15	2301.45	2506.53	7766.58	3083.41	3519.47	5006.6	4160.42	3774.98	3496.91	6400.24	6229.46	6449.3	2627.27	10014.8	8404.07	7153.21	5197.5	5275.21	5490.38	6026.05	7449.42	5628.42	7409.63	6076.85	5980	5188.63	7766.54	8506.54	3119.31	2795.37	2828.91	3409.73
PTCD2	144.818	170.407	173.901	95.1001	78.464	61.8896	109.661	143.042	80.6119	98.1237	104.483	78.9365	92.616	70.3367	107.82	121.073	221.416	202.097	267.735	215.518	243.504	242.511	213.768	260.187	273.728	206.54	225.99	227.477	247.914	228.232	189.661	197.805	207.236	286.876	307.783	303.139	186.807
KIAA2022	3.51073	271.28	0	0	2.0119	5.24488	10.4439	5.03669	5.30342	0	1.22922	3.48249	2.34471	2.34456	10.6052	0	22.5934	216.885	51.8198	44.0063	34.2544	45.6292	11.6601	205.503	223.224	0	1.58035	8.74912	4.42704	4.75484	6.09351	4.13818	1.40977	236.767	258.109	232.914	5.02169
JKAMP	832.044	1008.73	1013.86	976.861	992.872	715.402	744.648	1297.45	923.855	1096.68	1266.09	1049.39	1098.5	1003.47	1309.74	1257.3	995.241	1120.57	952.497	872.227	952.421	903.289	940.58	1616.68	1799.94	967.692	771.211	783.921	802.77	820.21	623.062	799.497	867.008	1400.56	1406.45	1431.43	1326.73
DKK3	617.011	689.464	381.568	782.49	399.362	834.985	2088.77	322.348	496.4	349.205	885.036	248.418	385.704	240.317	116.657	313.161	6989.28	2042.33	4398.51	3426.85	3508.84	4949.07	4177.22	1218.91	1597.92	3084.93	3105.39	2853.09	2642.21	3948.1	2984.3	1886.18	2450.18	1225.17	978.867	926.975	5219.54
ARHGEF5	420.41	758.018	503.974	464.656	599.546	469.941	365.535	210.534	599.286	692.638	538.397	378.431	341.155	307.137	378.252	293.37	472.203	780.458	477.482	497.61	551.794	485.021	401.301	678.249	648.462	687.917	704.046	735.801	664.794	607.827	731.222	705.147	784.536	526.148	484.077	495.089	380.644
NFE2L3	2444.35	590.549	2546.04	2767.08	2449.49	2136.76	2000	1912.94	2286.83	2165.94	3916.28	2120.84	1984.8	1787.73	2341.98	1307.36	2119.27	787.03	2180.13	2315.41	2716.52	1850.52	1888.93	374.845	380.795	6900.57	6930.63	6232	5518.31	4796.84	5318.88	6692.27	6929.01	521.137	599.008	660.118	1012.37
MCUR1	854.864	1930.3	1046.78	795.003	797.718	693.373	721.671	924.737	792.33	890.328	1481.21	826.511	757.341	672.888	1007.49	1024.47	1483.26	1812.3	1290.56	1266.03	1293.48	1181.29	1107.71	4010.4	4176.62	1850.63	1979.39	2072.67	1975.94	1760.08	1863.85	1737.21	1676.92	4021.27	4041.11	3817.92	1498.47
LIMA1	1934.41	3541.34	1923.88	1907.01	1413.36	1874.52	2451.18	1501.94	1324.79	1287.15	1868.41	2210.22	2147.75	1787.73	1822.33	1583.27	3896.24	3974.58	3302.89	3370.43	4117.97	4158.17	4795.21	3500.61	3450.38	3647.77	3988.81	3756.87	3366.76	4208.82	3629.45	4043.83	4678.32	3000.3	3120.69	3513.61	4339.74
LETMD1	3069.26	3094.75	2812.8	2639.44	2808.61	2438.87	2239.17	2444.81	2449.12	2500.71	2018.37	2387.83	2857.03	2834.57	2529.34	2342.31	2496.58	2701.2	3281.92	3749.56	2997.26	2748.73	3057.86	2635.38	2774.65	1690.17	1668.06	1776.07	1641.69	1810.8	1837.19	1882.87	1916.58	3064.19	3120.69	3029.05	2480.71
SLC4A8	45.6395	474.986	67.5342	87.5922	61.3629	100.702	62.6632	247.805	41.3666	47.6189	39.3349	76.6148	126.614	100.816	121.96	95.4618	53.0946	26.2891	41.9493	24.8241	45.4243	32.9544	42.7536	98.7827	173.731	64.1837	51.3614	61.2438	47.9596	25.3591	30.4676	35.5884	53.5712	221.734	223.045	97.1451	22.0954
LAMC3	140.429	335.918	160.394	97.6027	158.94	131.122	301.828	56.411	118.797	43.2899	114.317	44.1116	110.201	42.202	12.3727	26.7759	1128.54	637.511	948.795	780.83	230.845	246.736	451.828	396.895	512.103	41.9663	49.7811	43.7456	126.909	103.021	51.7949	158.906	54.981	499.841	246.421	245.789	481.078
PTGER3	3714.36	9406.67	5467.74	3653.01	3090.28	2041.31	976.502	821.989	1254.79	3581.52	6426.34	278.599	403.29	404.436	666.36	478.473	1140.97	14054.8	170.265	775.188	1138.59	1748.27	1509.98	13165.4	15260.1	4.93721	6.3214	10.4989	26.5622	3.16989	11.4253	33.1055	4.93419	13048.5	14872	14062.6	9729.02
TNIP3	1.75537	4.89676	10.9743	21.6895	31.1844	52.4488	45.953	186.358	37.1239	18.7589	19.6675	127.691	124.27	69.1644	81.3066	140.864	30.5011	9.85841	19.7409	14.6688	46.169	24.5046	41.782	1.76398	1.01007	223.82	232.312	147.86	188.887	121.248	108.922	240.842	162.123	2.50547	1.94799	2.34085	10.0434
MAPK9	2035.35	1475.88	2591.63	1942.04	1942.49	1416.12	1275.2	1641.96	2076.82	1989.89	3066.89	1302.45	1195.8	1168.76	1710.97	1392.34	1513.76	1578.99	1664.4	1639.52	1546.66	1508.3	1374.92	1719.88	1727.21	1951.02	1638.03	1923.06	1949.37	2107.98	1773.21	1910.19	1896.84	1955.52	1922.67	1821.18	1949.42
COL23A1	8795.26	210.561	7471.82	11784.9	11509.1	4535.77	1879.9	3183.19	11148.8	15320.3	15255.8	3939.86	2439.67	3427.74	4038.82	2150.22	12652.3	326.971	12973.4	12841.9	14740.6	12905.5	10527.1	271.652	236.355	3083.29	4223.49	5806.79	6509.23	7967.52	6704.39	4415.44	4461.21	323.205	216.227	202.483	20947.5
BCAR1	4551.67	7014.12	4154.2	4105.15	3915.15	3672.47	3867.37	2201.04	4312.74	4333.32	4947.6	4989.25	4126.69	4389.01	4524.89	4728.85	4106.36	5420.48	3140.03	3248.57	3401.61	3783.84	2961.66	5482.44	5501.83	4450.07	3494.95	3328.17	3456.04	3507.49	3903.66	2973.7	3000.69	5518.29	5699.83	5043.35	5453.55
FAM160A2	2528.61	1449.44	2219.34	2116.39	2280.49	1855.64	1704.44	1640.96	2224.25	1888.88	1616.42	1369.78	1480.68	1439.56	1276.16	1208.41	1281.05	1427.83	1268.35	1290.85	1365.71	1360.43	1303.99	1348.56	1456.51	1115.81	1141.8	1080.52	1048.47	1142.75	1195.09	1181.04	1225.09	1352.95	1205.81	1211.39	2214.56
HERPUD1	6843.3	4273.89	8502.56	7736.48	10810.9	8577.48	8739.43	15621.8	7592.37	11050.5	11477.2	23042.5	22219.6	22756.3	22778.2	25515.1	7873.82	7390.52	5346.07	5120.53	6299.09	6688.9	7187.47	12654.8	13020.8	3296.41	3570.8	4003.6	4945.74	6027.55	4666.11	3545.6	3889.55	11839.6	11821.4	11579	10822.7
HOMER3	530.998	897.086	477.805	565.595	534.159	538.125	793.734	923.73	676.716	640.69	583.878	984.384	989.467	1039.81	867.859	1040.77	899.219	790.316	941.392	979.422	849.658	818.79	610.211	911.094	885.827	1758.47	1665.69	1697.33	1384.19	1440.72	1968.2	1624.65	1535.94	791.728	765.562	702.254	780.37
RAD51	66.7039	55.823	50.6507	40.8764	62.3688	103.849	116.971	105.771	38.1846	38.9609	60.2316	142.782	192.266	116.056	318.156	320.146	92.6331	19.7168	81.4311	54.1616	109.465	77.7386	96.1957	19.4037	25.2516	424.6	431.436	357.839	358.59	212.383	326.765	321.951	385.572	31.3183	27.2719	25.7493	92.3991
POLQ	100.934	26.4425	70.0668	70.0737	72.4283	142.661	143.081	181.321	61.5196	47.6189	35.6473	226.362	195.783	215.699	261.595	243.311	24.8528	11.5015	34.5465	39.4928	46.169	58.3039	93.2806	5.29193	8.08052	476.44	478.056	356.964	334.242	173.552	329.05	436.165	497.648	5.01093	8.76597	10.5338	47.2039
PIK3CB	2917.42	1567.94	4333.16	2656.13	2326.76	1738.15	1607.31	2533.46	2329.26	2303.02	4206.38	2376.22	1859.35	1935.43	3149.75	2643.83	2577.91	1690.72	2600.86	3019.51	3018.85	1991.63	2405.86	2771.21	2949.39	2550.89	2197.48	2110.29	2122.77	2510.55	2193.66	2390.22	2753.28	3225.79	3248.28	2832.42	2197.49
CYBA	8833.88	3618.7	7705.65	8110.2	8867.44	15963.3	13374.4	19105.2	10895.3	11069.2	10708.9	23872.5	21565.5	21744.6	26205.5	33403.5	12955.1	4490.51	13016.6	11412.3	11233.2	10324.9	10425.1	6451.75	6595.73	21930.2	22159.7	22613.9	24807.7	24478.7	25094.6	22329.6	19778.4	8643.86	7504.65	7412.29	7778.6
THOC3	185.191	211.54	230.461	247.761	197.166	197.208	173.368	175.277	255.625	256.853	318.367	293.69	185.232	225.078	309.318	331.788	361.495	391.05	479.95	476.171	358.926	296.59	343.001	277.826	286.859	373.582	298.686	322.843	295.874	330.461	378.56	332.71	321.427	572.499	494.791	525.52	633.737
HEBP2	1585.1	2992.9	1705.24	1315.55	1326.85	1252.48	1310.71	1154.41	1785.13	1632.03	2165.88	1520.69	1196.97	1264.89	1513.01	1807.95	3021.87	2553.33	3304.13	3435.88	2843.11	2741.98	2245.54	2703.29	2780.71	2529.5	2526.19	2590.61	2336.74	2523.23	2582.13	2689.82	2551.68	3312.23	3221.01	3355.6	2199.5
MPHOSPH9	717.945	598.384	703.2	634.001	618.659	773.095	795.823	1101.02	530.342	594.514	448.664	1331.47	1213.39	1207.45	1064.06	1123.42	576.133	456.773	579.888	626.243	642.642	665.003	630.616	653.553	641.391	882.937	991.67	936.156	861.797	905.797	855.377	796.187	986.133	569.994	607.774	605.108	495.138
PLEKHA5	8420.49	2147.72	9141.6	7023.22	7773.98	6523.58	5438.12	3066.34	6778.83	6285.69	6775.44	3615.99	3191.15	3766.53	2859.87	2009.35	2359.89	2513.89	1701.42	2159.69	2351.64	2436.94	2667.24	2854.11	2653.44	1680.3	1713.1	2405.13	2098.42	2600.1	1836.43	1392.91	1399.9	3035.37	3220.03	3377.84	4334.72
PRSS8	292.269	3219.13	258.318	530.558	620.671	766.802	498.173	798.82	2060.91	857.14	817.429	2068.6	1815.98	1722.08	2939.41	2324.84	254.176	2047.26	298.581	387.03	275.524	221.386	141.864	4265.3	4813.97	9.05154	6.3214	5.24947	20.6595	26.9441	21.3273	7.44873	9.86838	4460.98	4481.36	4129.25	1761.61
SIKE1	1118.17	1155.63	1121.91	1010.23	918.432	937.785	1004.7	984.17	741.418	805.192	1168.98	836.959	835.888	844.041	945.631	1005.84	756.88	994.057	746.451	680.405	687.322	870.334	776.367	1544.36	1503.99	1602.95	1453.92	1427.86	1347.3	1382.07	1441.88	1546.85	1841.86	1341.68	1233.08	1327.26	1260.44
RRP12	997.926	1180.12	1011.32	1162.06	1240.34	1169.61	1064.23	975.104	1279.18	1304.47	1444.33	1300.13	1603.78	1538.03	1764	1825.42	837.087	818.248	1251.08	1237.82	1143.05	916.808	867.704	749.69	681.794	2415.94	2227.5	2321.14	2107.27	1400.3	2206.61	2291.73	2438.2	823.046	863.935	881.328	747.227
FNIP2	1851.03	2793.11	1964.4	1431.51	1186.01	1420.31	1613.58	2998.85	1159.33	1352.09	1397.62	2167.27	2086.79	2609.49	2527.57	2357.44	3898.5	2546.76	2941.39	3055.62	4314.56	3555.7	3756.49	6189.79	5879.59	1147.08	891.318	1407.73	1567.91	1237.05	886.606	702.664	638.625	4869.38	4832.97	4631.36	3555.36
MSMO1	1659.7	1510.16	2144.21	1811.91	1744.32	1569.27	1967.63	1102.03	1756.49	2336.21	3101.31	2147.54	1971.9	1856.89	2486.92	3515.79	1258.45	1835.31	1652.06	1270.54	1043.27	1091.72	1251.52	2529.54	2700.91	1286.14	881.046	809.294	833.022	1017.54	971.154	1066	1122.88	1687.43	1796.05	2058.77	922.986
TTC17	4499.88	2063.49	4190.5	3597.12	3733.08	3430.15	3442.3	3625.41	3340.09	3369.4	3391.41	3227.11	2825.37	3460.57	3229.29	3292.27	3532.48	2433.38	3885.25	4532.65	3446.29	3571.75	3391.14	2063.85	2020.13	2528.67	2690.55	2649.23	2666.55	3411.6	2979.73	2784.17	3179.73	1805.19	1849.62	1882.04	2762.93
ALX4	8.77683	3.91741	5.90924	4.17106	4.0238	3.14693	11.4883	17.1248	6.3641	7.21498	2.45843	0	7.03412	3.51684	5.3026	5.82084	14.6857	0	6.16902	5.64183	11.1699	10.1398	9.71673	0.881988	1.01007	53.4864	57.6828	109.364	77.4732	48.3409	77.6923	147.319	174.106	12.5273	7.79198	2.34085	59.2559
FSTL4	5.2661	132.212	10.1301	3.33685	5.02975	3.14693	9.39948	1.00734	3.18205	2.88599	0	2.32166	5.86177	3.51684	0	1.16417	9.03738	803.461	1.2338	1.12837	2.23398	21.9696	16.5184	274.298	279.788	6.58294	4.74105	3.49965	4.42704	5.54731	9.14027	9.10401	4.22931	516.126	546.412	655.437	36.1562
FOXN3	1679.01	1647.27	1976.22	1947.88	1814.73	1856.69	1820.37	3300.04	2224.25	2186.14	2744.84	2257.82	2207.54	2058.52	2485.15	1932.52	2503.35	2844.15	1860.58	1853.91	2061.97	2092.18	2191.12	2353.15	2295.88	1402.99	1303.79	1198.63	1562.75	1645.97	1336.76	1235.66	1359.72	2446.59	2783.68	2679.1	4596.85
METTL24	12.2876	29.3805	13.5068	19.1869	8.04759	8.39181	30.2872	7.05137	8.48547	11.544	12.2922	3.48249	7.03412	2.34456	3.53507	9.31334	22.5934	29.5752	18.5071	38.3645	49.1476	48.1641	38.8669	81.1429	102.017	1.64574	4.74105	3.49965	8.11624	11.8871	3.04676	2.48291	2.11465	65.1421	81.8158	83.1	30.1301
AKR7A2	3275.51	2182	3546.39	3848.22	4183.74	2343.41	1349.35	1531.16	3942.56	6760.44	6099.37	1495.15	1431.44	1282.47	1889.49	1570.46	1170.34	2927.95	1389.26	1267.16	1245.82	956.523	970.702	6143.05	6248.26	2466.13	2291.51	2497.87	2533.74	2799.01	2535.66	2444.01	2434.67	8078.88	7428.68	7154.79	5179.37
MRTO4	1593.87	1144.86	1518.68	1850.28	1988.76	1602.84	1401.57	1065.76	2248.65	2480.51	2701.82	1902.6	1747.98	1754.9	2193.51	2620.54	1362.38	1268.45	1838.37	1490.57	1246.56	1163.54	1081.47	1001.94	1126.22	3728.41	3683.01	3448.9	3215.51	2275.98	3122.93	3362.69	3153.65	1098.65	1075.29	1070.94	1573.8
NNAT	76.3584	83.2449	69.2226	36.7053	22.1309	27.2734	37.5979	70.5137	18.0316	15.873	6.14608	10.4475	15.2406	29.307	14.1403	29.1042	15.8154	24.646	7.40282	31.5943	31.2758	25.3495	22.3485	12.3478	5.05033	5.76007	5.53123	6.12438	3.6892	6.33978	3.04676	8.27637	6.34396	12.5273	14.61	9.36338	3.01301
USE1	1461.34	759.977	1342.24	1482.39	1489.81	1388.84	1230.29	942.869	1514.66	1975.46	1945.85	1475.42	1515.85	1540.37	1539.52	1707.83	1128.54	951.337	1534.85	1367.58	1006.04	1188.05	901.713	1136	1086.83	1128.97	1393.08	1482.98	1486.75	1192.67	1448.73	1428.5	1265.97	1165.04	1120.1	1056.89	1771.65
MCF2L2	50.9056	31.3393	43.0531	48.3843	43.2558	45.106	59.5301	110.807	33.9419	18.7589	24.5843	41.7899	52.7559	30.4792	44.1884	24.4475	70.0397	64.0797	65.3916	44.0063	44.6796	33.7994	45.6686	28.2236	22.2214	65.8294	42.6695	42.8707	50.911	25.3591	41.1312	63.728	47.9321	22.5492	29.2199	23.4085	23.0998
NRIP2	944.387	467.151	753.851	1128.69	995.89	740.577	615.144	361.635	818.847	744.586	656.402	250.739	354.051	352.856	182.056	197.909	937.628	1547.77	404.688	570.953	1045.5	1454.22	1006.65	943.728	823.203	99.567	191.222	202.98	248.652	303.517	291.727	124.973	127.584	949.572	938.933	963.258	714.084
LAMA3	315.088	253.652	229.616	284.466	233.38	263.293	416.71	395.884	267.292	216.449	302.387	797.491	738.583	729.157	791.855	691.516	399.904	353.26	477.482	568.697	683.599	844.985	584.947	153.466	147.47	5858	6364.86	7575.86	6650.15	8236.96	6738.66	5671.8	6300.26	139.053	192.851	224.721	424.835
AP5M1	559.084	1688.4	687.161	429.619	380.249	477.284	586.946	844.15	379.725	431.456	508.896	689.533	602.59	521.664	811.298	647.277	1072.06	1672.64	801.973	745.85	909.975	964.127	890.053	2379.6	2368.6	533.218	546.801	566.943	578.467	503.22	428.069	540.447	472.273	2361.4	2226.56	2223.8	944.077
ANAPC4	1675.5	1053.78	1482.38	1383.12	1352	1364.72	1372.32	1495.9	1185.84	1072.15	873.973	760.344	950.779	960.096	809.531	790.47	1055.11	780.458	1178.28	1482.67	1352.3	1355.36	1406.98	705.591	636.341	700.26	794.916	772.547	723.821	652.998	773.876	774.668	791.585	628.872	665.24	654.266	964.164
KCNQ1	409	4382.6	307.281	335.353	377.231	288.468	315.405	711.181	477.307	471.86	558.064	637.296	475.976	641.236	721.154	431.906	1180.51	3312.43	951.263	785.343	836.999	780.766	682.115	3455.63	3603.91	488.783	450.4	444.455	553.38	621.299	671.81	557.827	556.154	3120.56	3515.16	3253.77	859.713
TRAPPC3	2027.45	1949.89	2145.9	2165.61	2240.25	1759.13	1519.58	1851.49	2387.6	2720.05	2780.49	2137.09	2072.72	2099.55	2449.8	2544.87	1634.64	2285.51	1301.66	1178.01	1345.6	1440.7	1438.08	2683.89	2674.65	3177.09	3099.86	2984.33	2894.55	2699.16	2851.76	3032.46	3132.51	2737.22	2700.89	2759.86	2477.7
THRAP3	3829.33	4252.34	4038.55	3819.85	3886.99	3682.96	4116.97	4714.35	3868.31	4129.85	4803.78	4613.14	3984.83	4299.92	4556.7	4866.22	3265.88	4958.78	3460.82	3098.49	3155.13	2912.66	3182.23	4551.94	4341.26	5413.65	5379.51	5261.72	5469.61	4932.35	5120.07	5267.08	5522.06	4211.69	4430.71	4304.81	5011.65
PHPT1	4665.76	3122.17	4178.68	5211.32	5907.94	4901.87	4097.13	2608	6112.72	7170.25	6544.35	3476.69	3191.15	3239.01	3570.42	3892.98	3524.58	2426.81	3668.1	4449.15	4386.8	4442.08	4185	3365.67	3391.8	3054.48	2764.03	2748.97	2670.24	2533.54	3116.83	3134.26	3098.67	3547.74	3449.9	3519.46	6372.52
ENTPD2	452.885	299.682	411.115	501.361	590.492	584.28	440.731	158.152	636.41	607.501	422.85	226.362	185.232	189.909	238.617	204.894	500.445	220.171	70.3268	160.228	393.181	800.2	597.579	601.516	572.707	541.447	278.932	310.594	309.893	280.535	470.724	559.482	607.61	461.006	403.235	399.114	2078.98
LY75	1191.02	530.809	1278.09	1259.66	1301.7	1210.52	1126.89	738.379	1409.65	1567.09	1830.3	776.596	671.759	558.005	811.298	665.904	276.77	241.531	266.502	139.917	288.184	244.201	321.624	172.87	212.114	1161.89	1278.5	1183.76	1344.34	781.378	1223.27	1419.4	1505.63	182.899	157.788	149.814	206.894
ARID4B	4544.64	6771.24	3307.49	4359.59	4858.73	4313.39	4236.03	3468.27	5517.67	4917.73	3706.09	3908.52	3444.38	3085.44	2515.2	3256.18	6099.1	6181.22	5006.78	5090.06	4354.03	4881.48	4962.34	2855	2928.18	2443.92	3336.12	2776.1	3025.14	3156.42	3537.28	2861.14	2332.46	3045.4	3003.81	3335.7	4960.42
OPN3	78.1138	147.882	97.9246	105.111	78.464	118.534	135.77	256.871	59.3983	88.0227	239.697	146.265	138.338	148.879	245.687	311.997	155.895	138.018	308.451	270.808	183.931	101.398	137.978	313.106	306.05	571.07	310.539	410.334	384.415	339.971	198.801	513.962	494.829	251.799	260.057	251.641	135.586
SDCCAG8	1370.94	1546.4	1259.51	1376.45	1575.32	1529.41	1557.18	1699.38	1617.54	1544.01	1594.29	1252.54	1374	1439.56	1361	1370.23	1329.62	1677.57	1301.66	1222.02	1199.65	1294.52	1313.7	1165.11	1122.18	1101.82	993.25	926.532	962.144	1132.44	962.013	1297.73	1392.15	1296.58	1303.21	1286.29	1514.54
PTPRN	295.779	0	233.837	456.314	445.635	383.925	446.998	160.167	353.208	450.215	371.223	189.215	173.508	226.25	194.429	445.876	66.6507	8.21534	621.837	267.423	57.3389	43.0942	23.3202	1.76398	4.04026	1556.04	736.443	348.215	520.915	27.7366	169.095	816.05	455.355	0	8.76597	7.02254	46.1995
HHAT	315.088	549.416	427.998	359.545	319.892	318.889	260.052	190.387	354.268	320.345	410.558	341.284	314.191	240.317	272.2	342.265	221.416	496.207	227.02	218.903	280.737	211.246	282.757	547.715	515.133	147.293	160.406	195.98	154.946	316.989	204.894	153.94	161.419	404.633	437.325	383.899	327.414
KIF1B	3008.7	1939.12	3327.75	2681.99	2556.12	2246.91	2365.54	2571.74	2011.06	2860.02	2806.3	2076.73	2191.13	2264.84	2220.02	2259.65	1421.13	2364.38	1494.14	1342.76	1483.36	1417.04	1358.4	3379.78	3075.65	2322.96	2053.67	1976.43	1842.39	1920.95	1861.57	2258.62	2337.4	3287.17	3280.42	3209.3	3109.43
FOXC1	600.335	3025.22	492.156	316.166	297.761	438.472	720.627	189.38	413.666	339.104	417.934	185.733	286.054	221.561	97.2144	178.118	1650.45	4863.48	1388.03	1034.71	1508.68	2083.73	1552.73	3529.72	3896.83	108.619	172.258	524.072	667.745	368.5	170.618	99.3164	75.4226	5111.15	5234.26	4323.54	906.917
TBC1D22A	2715.55	1439.65	2821.24	3228.4	3278.39	2711.6	1914.36	2930.35	3245.69	4167.37	4212.52	3384.98	3507.68	3314.03	3478.51	3023.34	1323.98	1690.72	1914.86	1496.21	1461.02	1244.66	1378.8	1804.55	1759.53	1844.87	1548.74	1487.35	1630.63	1782.27	1633.06	1557.61	1519.03	1916.68	2024.94	1913.64	1563.75
SYNE2	4284.85	8521.34	3948.22	4226.11	3609.35	3603.23	3235.51	4074.69	3584.05	3691.18	4865.24	4228.91	3460.79	4451.14	3747.17	2214.25	5395.31	7641.91	4831.58	5726.46	6344.51	5423.96	5594.89	9818.3	8732.01	2340.24	2731.64	2937.95	3597.71	3827.64	2984.3	2389.39	2451.59	7558.99	8415.33	8588.56	7835.84
PLEKHH1	452.885	868.685	425.466	292.808	310.838	262.244	307.05	298.172	183.498	191.918	142.589	172.964	193.438	288.381	157.311	152.506	284.677	374.62	178.902	330.611	392.436	448.687	417.82	660.609	544.425	280.598	295.526	289.596	263.409	329.669	299.344	292.983	318.608	452.237	533.75	574.678	660.854
ATP9A	688.981	2227.05	1023.14	1021.07	1098.5	832.887	1018.28	903.583	1303.58	844.153	1444.33	1607.75	1372.83	1484.1	1011.03	587.905	703.786	2683.13	495.989	678.148	556.262	670.918	579.117	2182.04	1978.72	966.047	754.618	1149.63	1413.7	2773.66	1316.96	768.875	822.6	2112.11	2572.33	2450.86	1051.54
SPO11	0	0	0.844178	0	0	0	0	0	0	0	0	2.32166	0	1.17228	1.76753	1.16417	0	0	0	0	0	0	0	0	0	1.64574	0.790175	2.62474	0	0	0	0	0.704884	0	0	0	0
CBLN4	61.4378	13.7109	37.988	50.0527	144.857	275.881	294.517	20.1468	106.068	33.1889	73.753	133.496	147.717	69.1644	22.9779	52.3876	491.407	18.0738	107.341	223.417	169.038	158.857	290.53	8.81988	28.2818	15.6345	48.2007	80.4919	108.463	96.6817	114.253	47.1753	32.4247	18.791	12.662	11.7042	2041.82
CHRDL2	18.4313	173.345	39.6764	42.5448	32.1904	48.2529	168.146	65.477	43.488	40.4039	52.8563	177.607	112.546	143.018	159.078	305.012	115.227	115.015	626.772	148.944	13.4039	10.9848	14.5751	29.9876	28.2818	4.93721	8.69193	15.7484	27.3001	30.114	14.4721	9.10401	2.11465	33.8238	23.3759	28.0901	4.01735
FAM168A	2074.84	1623.77	2075.83	2371.66	2465.58	2208.09	1837.08	2594.9	2042.88	2753.24	3100.08	2204.42	2138.37	2209.75	2228.86	2001.2	2229.97	1603.63	2513.26	2288.33	2118.56	1997.54	1853.95	2445.75	2542.33	1429.32	1307.74	1395.48	1491.91	2055.68	1569.84	1404.5	1323.77	2566.85	2709.66	2497.68	2446.57
RELT	336.153	130.254	370.594	332.85	349.064	526.586	620.366	2113.4	312.902	272.726	210.196	609.436	633.071	609.585	786.553	628.651	171.71	70.652	251.696	180.539	231.589	198.571	249.72	73.205	58.5838	697.792	521.516	455.829	419.093	218.723	310.008	577.691	613.954	52.6148	44.8039	47.9873	161.698
GALC	1219.98	1140.94	1581.99	1548.3	1284.6	1128.7	1253.26	4204.63	1459.5	1375.17	2194.15	2005.92	1927.35	2024.53	2752.05	2231.71	1540.87	1956.89	1679.21	1475.9	1336.67	1122.98	1090.22	1977.42	1957.51	1206.32	1024.86	1113.76	1076.51	956.515	754.834	1029.58	1160.94	1828.99	1840.85	1931.2	1997.63
NOP58	3324.66	4943.77	2353.57	3076.57	3308.57	2988.53	3139.43	2370.27	3528.89	3464.63	2865.3	4646.8	3412.72	3800.53	3513.86	4645.03	3535.87	4492.15	4460.2	4469.46	2870.67	3112.92	2994.7	2080.61	1989.83	6615.03	8054.26	6397.36	5615.7	3276.88	6222.24	6271.83	4964.5	2073.27	2020.07	2202.74	2335.09
SZRD1	4124.23	3246.55	3892.5	4969.4	5598.11	4614.45	3450.65	3060.3	6538.05	6805.17	6852.88	5330.53	4477.22	4853.23	4733.46	4775.42	2976.69	4411.64	2723.01	2453.07	2662.16	2657.48	2662.38	4059.79	4254.4	4399.87	4372.83	3992.22	4297.92	4155.73	4258.6	3956.1	3642.14	3911.03	4072.28	4147.98	3882.77
KCNH2	8.77683	60.7198	32.9229	20.0211	40.238	27.2734	44.9086	12.0881	19.0923	21.6449	31.9596	3.48249	11.7235	5.86139	5.3026	11.6417	18.0748	374.62	24.6761	22.5673	11.9146	29.5745	32.0652	176.398	121.208	343.136	358.74	243.226	223.566	203.666	309.246	587.622	787.356	85.1859	114.932	146.303	20.0868
CUL1	1827.34	1375.01	2074.14	1911.18	1607.51	1727.66	1903.92	2265.51	1640.88	1580.08	2794.01	2175.4	1968.38	1893.23	2384.4	2508.78	2380.22	1519.84	2413.32	2156.31	2058.99	2065.99	1936.54	1851.29	2066.59	3679.04	3378	3217.05	3078.27	2686.48	2654.49	3116.05	3077.53	1991.85	1991.82	2063.46	2026.75
FAM114A2	1187.51	728.638	1254.45	900.948	742.391	745.822	827.155	837.099	872.942	924.96	1263.63	905.448	827.682	764.326	1147.13	1209.57	1160.17	903.688	1124	1005.37	988.909	984.407	932.806	901.392	969.663	622.088	600.533	716.553	686.929	720.358	661.146	674.524	777.487	977.132	860.039	933.997	1178.09
CYFIP2	8787.37	22160.8	10021.2	5704.34	5952.2	3349.38	2184.86	2942.44	4801.71	8171.69	8118.97	2460.96	2366.98	2337.52	3254.03	1689.21	2697.66	12324.7	2104.87	2866.05	3244.49	2830.7	2881.98	22536.6	26821.3	1946.08	1971.49	2370.14	2752.88	3091.44	2760.36	1972.26	1910.24	30837.3	33222.1	25179.3	6440.82
TAB2	1104.13	2045.87	1503.48	1236.3	1215.19	1286.04	1420.37	3181.18	1137.05	1220.77	1985.18	2138.25	1830.04	1783.04	2854.57	2272.46	1929.48	2903.3	2436.76	2106.66	1802.08	1575.05	1573.14	3067.56	3235.24	2332.01	1878.25	1892.43	2011.35	2016.84	1592.69	1863.01	1958.17	3637.94	3613.53	3635.33	1257.43
GINM1	1203.3	4030.03	1440.17	1237.97	908.372	966.107	1107.05	1241.04	1069.17	1024.53	2014.69	1581.05	1316.55	1382.12	1728.65	1766.04	3487.3	5003.14	2880.93	2709.21	3158.11	2766.48	2641.01	5884.63	6102.81	2031.66	1634.87	2358.76	2363.3	3603.37	1836.43	1564.23	1731.9	5480.71	5388.15	5482.26	2251.73
EIF2AK2	2102.05	2037.05	2337.53	2344.97	2087.34	2172.43	2292.43	2474.02	2783.23	2122.65	2628.06	2286.84	2005.9	2076.11	2370.26	2025.65	2285.33	1882.96	1948.18	1835.85	2073.88	1954.45	2101.73	2130.88	1981.75	2513.86	2472.46	2365.76	2257.05	2157.9	2093.88	2408.42	2640.5	2065.76	2175.91	2240.19	2206.53
USP36	3221.1	3740.14	2837.28	3026.52	3071.16	2498.66	2780.16	3894.37	3208.57	3119.76	2494.08	2395.95	2579.18	2537.98	2232.4	2408.66	1850.4	2840.87	2646.51	2860.41	2118.56	1828.55	1908.37	2030.34	1931.24	2605.2	2330.23	2225.78	2240.82	2032.69	2399.32	2341.38	2211.93	1504.53	1646.06	1564.86	2136.23
KMT2C	3598.5	3231.86	3532.88	3134.97	3096.31	3195.18	3183.29	4605.55	2954	3090.9	2747.3	2799.92	2846.48	3155.77	2766.19	2373.74	3354	3443.87	3270.81	3608.52	3176.72	3370.64	3224.01	2558.65	2267.6	2675.97	2819.35	2626.49	2492.42	2776.83	2693.33	2901.69	2860.42	2363.91	2560.64	2682.61	2864.37
MCOLN3	21.9421	392.72	17.7277	6.67369	5.02975	28.3224	54.3081	47.3449	5.30342	11.544	3.68765	4.64332	21.1024	26.9624	22.9779	2.32834	5.64836	405.838	13.5718	11.2837	17.8719	7.60486	13.6034	380.137	305.04	18.926	10.2723	8.74912	12.5433	15.057	7.61689	15.7251	14.0977	409.644	361.353	465.828	34.1475
CCDC85A	6.14378	24.4838	25.3253	45.8816	6.0357	22.0285	46.9974	6.04403	26.5171	8.65797	29.5012	33.6641	16.413	18.7565	12.3727	30.2684	51.9649	49.2921	24.6761	29.3375	52.1263	37.1793	40.8103	54.6833	35.3523	4.11434	9.4821	6.9993	11.0676	5.54731	13.7104	4.96582	6.34396	66.3949	43.8299	52.669	185.802
PUM2	3706.46	2903.78	4238.62	3653.01	3447.39	3093.43	3302.35	4173.4	3065.37	3463.19	4864.01	3856.28	3416.24	3616.48	3687.08	3553.04	4247.57	3790.56	4292.4	3961.7	3933.3	3769.48	4031.47	4572.23	4770.54	3799.18	3555.79	3668.51	3703.22	4121.65	3637.07	3426.42	3795.1	5124.93	5238.16	5524.39	3788.36
MRPL43	1763.27	1615.93	1619.13	1915.35	2110.48	1669.97	1269.97	1192.69	2302.74	2894.65	2494.08	1668.11	1466.61	1659.95	1679.16	1791.65	1505.85	2030.83	1185.69	1268.28	1275.6	1368.88	1287.47	2643.32	2714.05	2284.28	2078.16	2547.74	2474.72	2834.68	2452.64	2040.12	1996.23	2793.6	2767.13	2895.63	2495.78
ITIH4	14.0429	44.0708	10.1301	8.34211	16.0952	12.5877	12.5326	14.1027	5.30342	4.32899	2.45843	9.28664	11.7235	11.7228	8.83767	26.7759	6.77803	92.0118	12.338	6.7702	8.93593	9.29483	12.6318	5.29193	3.0302	4.11434	3.95088	8.74912	8.11624	0	3.04676	6.62109	5.63907	6.26367	9.73997	7.02254	1.00434
ITIH1	555.574	0.979352	611.185	472.164	372.201	456.305	221.41	107.785	218.501	418.469	925.6	38.3074	52.7559	33.9961	90.1442	533.189	0	1.64307	0	1.12837	2.23398	8.44985	8.74506	3.52795	5.05033	0.822868	0	3.49965	12.5433	7.13226	2.28507	0	0.704884	1.25273	0.973997	0	1.00434
C4orf27	454.64	693.381	550.404	421.277	360.13	417.493	478.329	381.781	423.213	441.557	647.797	514.248	450.184	364.579	509.05	622.83	738.806	829.75	882.17	809.039	751.363	737.672	750.132	735.578	764.619	973.452	974.286	1021.9	968.046	844.776	909.457	888.882	943.84	686.498	687.642	836.852	751.245
ZFR	2446.98	2803.88	3004.43	2609.41	2423.33	2368.59	2462.66	2525.4	2285.77	2608.94	3858.51	2169.59	1780.81	1724.42	2416.22	2260.81	3546.04	2622.34	4463.9	4045.19	3744.9	3388.39	3269.68	3071.97	3071.61	3024.86	3198.63	3698.25	3443.5	3539.18	2961.45	2371.18	2379.69	3589.08	3703.14	3438.7	3086.33
ZNF280C	116.732	130.254	131.692	140.147	121.72	147.906	147.259	166.211	109.25	112.554	102.025	94.0273	133.648	94.9546	95.4468	136.208	177.359	103.513	178.902	151.201	176.485	186.742	158.383	89.0808	90.9059	157.168	148.553	154.859	135.763	133.928	165.287	156.423	162.123	66.3949	75.9718	98.3155	122.529
NPFFR2	0	1.9587	0	0.834211	0	1.04898	0	3.02202	2.12137	1.443	3.68765	0	0	0	0	1.16417	3.38902	6.57227	3.70141	1.12837	0.744661	0	0	0.881988	1.01007	483.846	390.347	723.552	598.388	583.26	310.769	269.81	274.905	1.25273	0.973997	2.34085	2.00868
PHF21B	0	274.218	0	0	2.0119	0	4.17755	8.05871	1.06068	1.443	0	4.64332	4.68942	0	3.53507	1.16417	4.51869	200.454	0	0	0	3.37994	3.88669	134.944	141.409	16.4574	14.2232	9.62403	10.3298	7.92473	6.8552	23.1738	29.6051	146.57	210.383	172.052	1.00434
TRAF1	1004.95	918.632	777.488	852.564	866.122	1365.77	1481.99	1899.84	817.787	748.915	492.916	1105.11	1198.15	1024.57	724.689	756.709	968.129	489.634	752.62	1163.35	1577.94	1477.88	1610.06	336.038	356.553	1232.66	1340.14	1222.25	1390.09	1512.04	1489.1	1346.57	1301.92	326.963	274.667	277.39	649.807
RC3H2	1053.22	1899.94	1091.52	975.193	846.003	1104.57	1213.58	2061.02	831.576	829.723	1066.96	1210.75	1284.9	1146.49	1412.26	1171.15	1574.76	1666.07	1420.11	1288.59	1563.79	1508.3	1509.98	1965.07	1995.89	1468	1100.71	1131.26	1141.44	925.609	834.811	1177.73	1227.2	1844.02	1911.96	1988.55	1693.31
PCGF2	1543.84	2315.19	1239.25	1574.16	1536.08	1451.78	1274.15	742.409	1951.66	1643.57	1824.16	1321.03	935.539	1261.37	1125.92	1422.61	2245.79	2318.37	1726.09	1732.04	1839.31	2138.66	2018.17	3556.18	3515.03	1313.3	1698.88	1639.59	1733.19	2042.2	2112.93	1511.26	1349.85	3701.83	3425.55	3453.92	2828.22
KIFC1	0	0	0	0	0	0	0	0	0	0	0	0	0	0	0	0	0	0	0	0	0	0	0	0	0	0	0	0	0	0	0	0	0	0	0	0	0
IL17RB	2702.39	1090.02	2881.18	1657.58	1735.26	1340.59	940.993	609.44	1082.96	1672.43	1923.72	552.555	553.351	536.904	671.663	583.248	1047.21	279.322	261.566	578.852	843.701	1454.22	1035.8	3142.52	3279.68	153.053	175.419	135.611	111.414	186.231	161.478	133.25	140.272	2913.86	2211.95	2155.92	1609.95
TRAF3IP2	1108.51	704.154	1332.96	1429	1296.67	1116.11	1107.05	696.071	1651.48	1604.61	2108.11	761.505	718.653	678.749	913.815	809.097	2052.61	699.947	3508.94	2647.15	2007.61	1732.22	1614.92	558.299	510.083	2739.33	2468.51	2130.41	1984.05	2166.62	2094.65	3000.18	3103.61	667.707	724.654	718.639	1289.57
GYG2	77.2361	184.118	62.4692	42.5448	64.3807	80.7712	91.9061	34.2495	71.0658	54.8338	97.1081	2.32166	14.0682	1.17228	14.1403	54.7159	7.90771	103.513	37.0141	11.2837	2.97864	2.53495	10.6884	221.379	252.516	257.558	259.178	53.3696	64.9299	106.191	338.952	227.6	229.792	261.821	260.057	216.528	1.00434
DCBLD2	767.973	1085.12	600.21	688.224	652.861	1002.82	1448.56	720.247	659.745	509.378	870.285	1061	997.673	990.576	1030.47	2080.37	1756.64	2334.8	1790.25	1314.55	1173.59	1246.35	1390.46	1749.87	1742.36	33062	30118.3	20447.6	16310	13658.3	20360	27222.6	31391.3	1644.84	1860.33	1990.89	902.9
SERPINB3	0	0	0	0	0	0	0	0	0	0	0	0	0	0	1.76753	0	0	0	0	0	0	0	0	6.17392	1.01007	0	0	1.74982	0	0	0	0	0	0	0	1.17042	0
SOAT1	1987.08	1270.22	2802.67	2500.13	2652.69	2062.29	1990.6	4929.92	2594.43	2969.69	3892.93	4378.65	4247.44	3947.06	5682.62	7640.43	1926.09	1542.84	2488.58	1994.95	1836.33	1523.51	1832.58	1757.8	1762.56	4750.42	2779.84	2826.84	2633.35	2326.7	1984.96	3447.94	3799.33	1389.28	1507.75	1581.24	1207.21
PKP2	794.303	211.54	1105.03	777.485	789.67	585.329	552.481	351.561	641.713	692.638	1521.77	286.725	323.57	233.283	420.673	257.281	268.862	285.894	454.04	383.645	376.054	365.878	266.238	824.659	721.187	854.96	1071.48	1231	1243.26	1267.16	1149.39	1059.38	1170.11	940.803	947.699	861.431	1347.82
MSH4	84.2576	12.7316	83.5736	70.0737	94.5592	58.7427	73.1071	45.3302	82.7333	62.0488	11.0629	15.0908	35.1706	21.101	19.4429	13.97	50.8352	3.28614	57.9888	91.3977	84.8913	123.368	154.496	1.76398	5.05033	27.9775	14.2232	14.8735	9.59192	9.50968	17.5189	29.7949	37.3589	0	3.89599	2.34085	10.0434
F7	1.75537	45.0502	1.68836	0	5.02975	6.29386	4.17755	6.04403	1.06068	2.88599	0	0	3.51706	1.17228	1.76753	5.82084	7.90771	46.0059	4.93522	6.7702	5.95729	5.06991	2.91502	32.6336	25.2516	1.64574	1.58035	0.874912	0.73784	0.792473	3.04676	0	0.704884	53.8675	46.7519	47.9873	9.03904
GDI2	5410.04	6001.47	7086.87	5987.13	5462.3	5062.36	5347.26	8043.6	5567.53	6601.71	9817.75	7886.68	6960.27	6405.33	11517.3	10832.6	8551.62	7117.77	11905	10466.7	8915.08	7174.76	7994.93	9603.09	10168.3	8965.14	7586.47	8161.18	8482.95	8117.3	6679.25	7343.62	7203.92	10494.1	10098.4	10252.9	11014.6
PRDM1	901.381	162.572	773.267	735.774	1157.85	1561.93	1827.68	3252.7	696.869	725.827	749.822	1795.8	1766.74	1609.54	1437.01	1210.73	1452.76	455.13	1299.2	830.478	1227.2	1078.2	1481.8	245.193	239.385	450.932	601.323	543.32	897.951	944.628	645.151	545.413	400.374	291.887	367.197	399.114	1252.41
ATG5	539.775	1102.75	723.46	632.332	482.856	567.496	586.946	872.355	569.587	585.856	897.328	711.589	657.691	588.484	889.07	833.544	1119.51	1293.1	1201.73	1100.16	1055.18	996.237	996.937	1457.93	1458.53	1460.59	1243.74	1197.75	1151.77	1206.94	983.341	1123.1	1225.79	1559.65	1591.51	1582.41	671.902
TMCC3	504.668	556.272	727.681	682.385	409.421	403.856	570.235	744.423	666.109	571.426	640.422	650.065	575.626	554.488	618.637	736.918	2330.51	1850.1	1049.97	872.227	1556.34	1959.52	1852.01	1584.93	1402.98	733.175	507.293	576.567	521.653	538.089	422.738	621.555	589.283	1488.25	1612.94	1701.79	1984.57
PITHD1	1467.49	1559.13	1530.49	1506.59	1557.21	1355.28	1276.24	1900.85	1575.11	1854.25	2042.96	1604.27	1600.26	1378.6	2246.54	2128.1	1143.23	2155.71	1137.57	1086.62	965.08	922.723	1059.12	2010.05	2051.44	2345.17	2146.12	2023.67	1890.35	1924.92	1959.06	2012.81	1958.17	1872.84	2035.65	2126.66	1641.09
MTA3	1430.62	1116.46	1522.05	1283.85	1349.98	1301.78	1163.45	798.82	1225.09	1494.94	1449.25	1067.96	1001.19	1033.95	1056.99	974.409	1041.56	1132.07	1441.08	1395.79	1119.23	1177.91	1082.44	1214.5	1257.53	898.572	847.858	810.169	904.592	1021.5	1201.18	994.819	1016.44	1296.58	1338.27	1350.67	1297.6
USP13	319.477	956.827	306.437	390.411	301.785	496.166	679.896	343.503	260.928	272.726	447.435	456.206	431.426	403.264	457.791	424.921	1085.61	757.455	562.615	567.568	861.573	996.237	955.155	902.274	948.451	1721.44	1554.28	1426.98	1222.6	747.302	1145.58	1344.08	1373.82	922.012	885.363	823.978	679.937
ATP11B	1186.63	1141.92	1747.45	1366.44	1077.37	1307.02	1424.54	2211.11	844.304	933.618	2030.67	1475.42	1275.52	1400.87	1972.57	1945.32	1641.41	1040.06	1792.72	1629.36	1819.95	1567.45	1575.08	1936.85	2061.54	1448.25	1052.51	1329.87	1507.41	1154.63	1028.28	1153.73	1233.55	1649.85	1599.3	1735.74	1876.1
LAMC2	402.857	1882.31	513.26	499.693	361.136	1072.05	1457.96	1955.24	808.241	432.899	779.323	1909.57	1656.54	1470.04	2483.39	7579.9	27.1121	437.056	128.316	49.6481	41.701	17.7447	17.4901	351.913	376.754	5060.64	4627.27	3578.39	3272.32	2639.73	2831.96	4513.93	4521.83	274.349	226.941	228.232	28.1215
CDK14	1281.42	640.496	1515.3	924.306	919.438	1009.12	1310.71	731.328	766.874	1194.8	1508.25	852.05	750.307	777.221	882	839.365	1671.91	1334.17	1624.92	1835.85	1749.95	1798.97	1821.89	2476.62	2316.08	1345.39	2457.45	2714.85	2578.75	2822.79	2234.03	1654.45	1421.05	1983.08	2092.15	2445.01	1636.07
SEC61A1	16991.9	6832.94	17397.7	20665.1	24428.5	18557.4	14499.2	14506.7	26590.3	30236.5	32103.4	28129.2	28836.4	29078.4	31690.1	35769.1	11249.3	7717.49	13708.8	12634.3	10337.4	9739.29	9023.93	8473.26	8439.1	13825	14675.1	13145.6	15355.2	12823	16408.3	15634.9	16492.2	7587.81	7567.96	7637.01	7895.1
PPP1R12A	3137.72	4415.9	2503.83	3129.13	3391.05	3398.68	3425.59	3481.36	3769.67	3486.28	2973.47	5067.03	3729.26	4050.22	3600.47	4102.53	5073.36	4589.09	4188.76	3768.74	3666.71	4890.77	4430.83	2589.52	2432.24	2432.4	2806.7	2413.88	2534.48	2333.04	2659.82	2304.97	2036.41	2601.93	2607.39	2553.86	4412.06
RASGRF1	26.3305	22.5251	35.4555	38.3737	38.2261	28.3224	24.0209	32.2348	31.8205	34.6319	55.3147	89.3839	60.9624	41.0298	45.9559	31.4325	7.90771	54.2213	22.2085	22.5673	23.0845	5.06991	3.88669	191.391	176.761	16.4574	14.2232	10.4989	17.7082	17.4344	13.7104	15.7251	2.81954	42.5929	40.9079	43.3056	14.0607
CAMK2B	27.2082	210.561	19.4161	16.6842	24.1428	13.6367	19.8434	19.1394	22.2743	21.6449	3.68765	9.28664	8.20648	4.68911	8.83767	3.4925	111.838	412.41	171.499	269.68	137.762	149.562	123.403	246.075	243.426	10.6973	28.4463	26.2474	20.6595	23.7742	28.1825	23.1738	11.983	280.612	294.147	266.856	14.0607
CROCC	2903.38	2038.03	2228.63	2156.44	2250.31	2468.24	2356.14	2026.77	1999.39	1699.85	1205.86	1742.41	2307.19	2607.15	1323.88	1274.76	1354.48	1572.42	774.829	964.753	1294.97	1831.08	1551.76	1045.16	988.854	1063.15	1404.93	1419.98	1513.31	1899.56	1837.96	1291.11	1154.6	1236.45	1198.99	1122.44	2779
POLR3E	2946.38	1442.58	3357.3	2963.95	3006.78	2659.15	2603.66	2149.66	2445.94	2466.08	2977.16	1911.89	1867.56	1964.74	2043.27	2130.43	1288.96	1271.74	1297.96	1436.41	1574.96	1448.3	1529.41	1509.08	1428.23	1665.48	1615.91	1637.84	1523.64	1349.58	1546.23	1615.55	1736.13	1504.53	1426.91	1336.62	1133.9
ATP2B4	2813.85	1516.04	3130.21	3319.33	2480.67	3384	4349.87	3547.85	3172.5	2269.83	4264.15	4178.99	3430.31	3542.63	4167.85	5592.66	4405.72	2811.29	4709.43	4248.3	3700.96	3937.63	4101.43	2467.8	2239.31	2759.08	3110.13	3130.44	3771.1	3042.3	2863.95	3380.07	2892.85	1927.96	1993.77	2237.85	4064.55
ZC3H11A	5192.37	4480.53	4928.31	5040.3	4889.92	4741.37	4941	5455.75	4292.58	4388.15	4711.59	3797.08	3826.56	3896.65	4010.54	4327.21	5952.24	4837.19	5342.37	5325.89	6006.43	6163.32	5960.24	4216.79	4286.72	4202.39	4138.94	3755.12	3879.56	3883.91	4332.49	4661.25	4903.18	4161.58	4452.14	4293.11	5505.78
RIOK2	552.063	404.472	692.226	429.619	382.261	394.415	475.196	417.038	416.849	463.202	647.797	579.254	418.53	437.26	560.308	626.322	970.388	576.717	1321.4	1173.5	884.657	867.799	893.939	702.945	736.338	638.545	640.042	905.534	813.838	683.904	655.814	710.94	712.638	620.103	649.656	711.617	795.435
YIPF1	919.812	1044.97	952.233	1032.75	1039.15	869.601	775.98	1170.53	1093.56	1274.17	1425.89	1078.41	1112.56	1106.63	1422.87	1406.31	500.445	632.581	478.716	485.198	397.649	321.094	365.349	1369.73	1289.85	1414.51	1251.64	1229.25	1139.23	1059.54	970.392	1359.81	1402.02	1222.67	1172.69	1124.78	705.045
NDC1	418.655	523.953	480.337	455.479	446.641	434.276	427.154	596.345	428.516	490.619	721.55	726.68	676.448	622.48	1065.82	920.857	385.218	673.658	504.626	438.935	411.797	350.669	364.377	635.032	739.368	1578.26	1235.83	1140.89	1084.63	690.244	880.513	1147.93	1318.13	687.751	715.888	661.289	426.844
DGKG	230.831	143.965	291.241	191.034	210.243	222.383	270.496	292.128	203.651	183.26	299.929	320.389	303.64	253.212	369.415	374.862	154.765	123.23	151.758	115.093	161.591	233.216	162.269	149.056	153.53	512.647	509.663	427.832	389.58	236.157	406.742	408.853	477.207	201.69	125.646	117.042	72.3123
FLYWCH1	4251.5	2392.56	4003.94	4374.6	4757.13	3830.86	3255.35	3218.45	4510.03	5141.39	4714.04	2875.38	3049.29	3166.32	2808.61	2558.84	2025.5	1534.63	1770.51	2007.36	2058.24	2022.05	1961.81	2015.34	2035.28	2130.4	2161.92	1892.43	1967.82	2195.15	2300.3	2450.63	2540.4	2065.76	2049.29	2098.57	2772.98
UNKL	2854.23	725.7	2387.33	2466.76	2875	2428.38	2431.33	1860.55	2118.18	1965.36	1322.64	860.175	1145.39	1114.84	942.096	811.425	806.586	603.006	792.102	1120.47	1049.97	1162.7	1135.89	602.398	526.244	664.054	735.653	713.053	700.948	860.626	870.611	767.219	766.914	641.4	619.462	600.427	872.769
TBXAS1	1074.28	258.549	1248.54	1324.73	1239.33	1120.31	1163.45	4543.1	1327.98	1513.7	1293.14	2559.63	2662.42	2842.78	3303.52	2819.61	1154.52	476.49	1453.42	1263.77	1478.9	966.662	1122.28	533.603	504.023	2273.58	1739.18	1486.48	1617.35	1229.13	1016.86	1868.8	1922.92	285.623	308.757	334.741	1007.35
PARP12	1425.36	1180.12	1361.66	1484.9	1217.2	1511.57	1454.83	2481.08	1697.09	1336.21	971.081	1352.37	1682.33	1453.63	1392.82	1203.75	1853.79	854.396	1557.06	1853.91	2109.62	2056.69	2117.28	891.69	913.099	3163.1	3780.99	3172.43	2764.69	2817.24	2861.67	3157.43	3407.41	828.057	938.933	901.225	1808.81
ALDH18A1	2156.47	1867.62	2308.83	2757.9	2590.32	2622.44	2710.18	1894.8	2597.61	2588.73	4003.56	2727.95	2393.95	2559.08	4035.28	4092.05	2502.22	1352.25	4170.26	3592.72	2528.87	1922.34	2082.3	1927.14	1792.87	5258.95	3984.85	4596.79	4487.54	4017.84	4354.58	4894.64	4789.69	1558.4	1574.95	1488.78	1585.85
TARBP1	2945.51	1314.29	3166.51	2368.33	2425.34	2727.34	2162.93	2150.67	2104.4	1720.05	1134.57	1325.67	1830.04	1806.48	1263.79	1253.81	1458.41	913.546	1080.81	1303.26	1899.63	2226.53	2210.56	919.914	901.988	1435.08	1915.39	1589.72	1680.8	2165.04	1837.19	2099.71	2486.13	953.33	920.427	939.849	812.509
PET112	1005.83	1127.23	1046.78	987.706	979.795	845.475	749.87	661.822	1092.5	1203.46	1406.22	812.581	699.895	661.165	936.793	793.963	848.384	1220.8	619.37	687.175	708.917	778.231	692.803	1915.68	1955.49	794.067	647.154	875.787	800.557	677.564	798.25	657.144	712.638	1790.16	1789.23	1811.81	921.982
MXD1	1659.7	498.49	1335.49	1479.06	1545.14	1318.56	1926.89	6234.42	1212.36	1176.04	700.653	1223.52	1456.06	1682.22	2932.34	2210.75	389.737	404.195	625.539	471.657	379.777	368.413	423.65	509.789	488.872	1601.3	872.354	685.056	469.266	528.58	491.29	815.222	806.388	384.589	430.507	406.137	553.39
CDK17	1138.36	887.293	1122.76	1096.15	915.414	1079.4	1469.45	1418.33	862.335	829.723	951.414	1109.75	1038.71	928.445	1097.64	1157.18	2028.89	918.475	1687.84	1408.2	1617.4	1836.15	1898.65	891.69	950.471	966.87	824.943	807.544	966.571	870.928	751.026	824.326	784.536	940.803	861.987	875.476	1588.86
DNAJC25	402.857	552.354	406.05	327.011	304.803	304.203	332.115	397.899	275.778	259.739	467.102	366.822	364.602	328.238	402.998	450.533	476.722	612.865	551.51	578.852	408.819	507.836	481.95	799.082	764.619	348.073	268.66	258.099	210.284	231.402	229.268	285.535	285.478	690.256	632.124	730.344	397.718
SLC2A3	9060.33	1010.69	5292.15	4879.3	4700.8	4482.28	10802.1	24420.9	4790.05	4012.97	6433.72	5145.96	5092.71	6542.49	19633.8	16696.5	5536.52	317.112	11810	7350.18	4697.32	3428.1	4519.25	251.367	345.442	8017.2	2555.43	2954.58	2085.87	887.57	1792.25	4905.4	4125.69	372.062	189.929	177.904	1813.83
PSD	100.934	154.738	97.0804	102.608	119.708	196.159	165.013	113.829	136.828	67.8208	56.544	133.496	151.234	180.531	81.3066	115.253	54.2243	88.7257	33.3127	58.6751	75.9554	62.5289	101.054	69.6771	69.6945	69.9438	99.5621	95.3654	101.822	114.116	132.534	75.315	55.6859	46.3511	69.1538	111.19	47.2039
CTDP1	712.679	894.148	660.147	753.293	804.759	736.381	784.335	1166.5	909.006	888.885	878.89	1051.71	994.156	895.621	1021.63	946.469	987.334	1166.58	1104.25	1059.54	1025.4	894.839	919.203	1546.13	1510.05	1614.47	1565.34	1500.47	1692.61	1553.25	1437.31	1198.42	1065.79	1450.67	1449.31	1410.36	990.277
YBX3	25667.8	8063.98	27434.9	23205.3	19244.8	16820.3	17338.9	15739.7	18516.3	20770.5	34065.3	22010.5	17100	21079.9	27227.1	21410.2	14194.3	5739.24	29860.5	25678.2	13211	11551.8	12316.9	6292.99	6039.18	12914.1	12300.7	16526.2	15952.1	16927.2	14693.7	16185.3	15574.4	5668.62	5543.02	5538.44	11086.9
STYK1	14.9206	38.1947	12.6627	17.5184	17.1011	63.9875	77.2846	42.3082	42.4273	7.21498	22.1259	29.0208	31.6536	33.9961	26.513	30.2684	21.4638	23.003	11.1042	12.412	21.5952	38.8693	15.5468	26.4597	10.1007	189.26	187.272	268.598	197.741	110.946	232.315	153.113	144.501	12.5273	1.94799	14.0451	9.03904
WNK1	6960.03	6548.92	9180.43	7166.71	6051.79	7125.7	7503.92	8873.65	6258.03	6479.05	10820.8	8475.22	7486.65	7938.67	10117.4	8983.88	3692.9	20117.7	3644.66	3347.86	3613.09	3591.18	4085.89	23614.4	19826.6	6439.76	5762.75	5574.94	5954.37	5313.53	5044.67	5594.82	5609.47	16110.2	20161.7	21678.6	4161.98
RPS17P5	0	0.979352	0	1.66842	0	0	1.04439	2.01468	0	1.443	0	0	0	0	0	0	0	0	0	0	1.48932	0	0	1.76398	1.01007	3.29147	2.37053	6.9993	4.42704	1.58495	7.61689	4.96582	2.11465	3.7582	0.973997	7.02254	3.01301
CCAR1	3865.32	9884.6	2989.23	3677.2	4062.02	4021.77	4565.02	3495.47	4188.64	4043.27	3225.46	4500.54	4333.02	4554.3	3526.23	4551.9	5729.7	8668.83	4681.05	4684.98	4082.23	5177.22	4699.01	3724.64	3384.73	4952.84	5687.68	4605.54	4661.67	3551.86	5101.03	4568.56	3824	3963.65	3875.53	4013.38	4609.91
OGFR	7177.69	2510.08	5506.57	5770.24	6575.89	6621.14	5820.37	6102.46	6890.2	5887.42	4997.99	5064.7	5628.47	5347.94	4876.63	5245.74	3618.34	2131.06	3485.5	3502.45	3955.64	4563.76	3972.2	2654.79	2628.19	3963.75	4042.54	3389.41	3564.51	3368.01	3658.39	3567.94	3525.83	2486.68	2655.12	2416.92	5792.02
GNA15	288.758	38.1947	233.837	322.84	351.076	393.366	409.4	1655.06	443.366	451.658	368.765	930.986	895.678	1094.91	1490.03	1236.35	167.191	11.5015	375.076	128.634	139.252	111.538	148.666	81.1429	80.8052	754.57	463.043	465.453	520.177	296.385	314.578	534.653	570.956	8.76914	10.714	16.3859	119.516
CREB3L3	293.146	10.7729	310.657	382.069	327.939	309.448	222.454	71.5211	241.836	500.72	607.233	33.6641	24.6194	17.5842	54.7936	24.4475	246.269	13.1445	11.1042	20.3106	97.5506	551.775	173.93	178.162	196.963	73.2352	102.723	98.8651	83.3759	37.2462	54.0799	55.4517	13.3928	82.6804	75.9718	119.383	3273.14
PIGV	636.32	528.85	610.341	580.611	651.855	444.766	387.468	410.994	571.708	810.964	1001.81	326.193	344.672	362.234	524.958	388.832	381.829	555.357	264.034	295.632	308.29	307.574	309.964	859.939	964.612	643.483	505.712	610.689	602.815	630.809	489.004	568.586	617.479	881.924	789.912	772.479	774.344
PTPRU	3717.87	717.865	3989.58	4783.37	5279.22	5513.42	4753.01	1994.53	7344.17	5252.5	5347.09	3682.15	2658.9	3352.72	4606.19	5827.82	920.683	801.817	3801.35	2041.22	704.449	787.526	1035.8	500.969	521.194	799.005	692.194	615.063	688.405	590.392	729.698	921.16	942.43	730.344	807.444	731.514	1536.64
SNRNP40	521.344	840.284	620.471	573.103	447.647	540.223	661.097	791.768	488.975	458.873	722.779	644.261	638.933	593.173	943.863	963.931	656.34	1196.15	723.009	529.204	603.175	526.425	590.777	976.361	1028.25	1696.75	1497.38	1295.74	1295.65	1070.63	1124.25	1354.84	1590.92	958.341	1110.36	1132.97	627.711
RIMBP2	5.2661	1106.67	0	0.834211	1.00595	8.39181	11.4883	7.05137	1.06068	0	0	3.48249	3.51706	0	0	3.4925	2.25934	190.596	1.2338	5.64183	9.68059	10.1398	6.80171	123.478	96.9663	4.93721	7.11158	4.37456	2.95136	1.58495	2.28507	4.13818	4.22931	112.746	150.97	149.814	3.01301
COL11A1	59.6825	0.979352	0.844178	0.834211	5.02975	361.897	560.836	698.086	7.42478	4.32899	4.91687	58.0415	250.884	8.20595	15.9078	75.6709	262.084	16.4307	597.161	234.7	58.8282	71.8237	223.485	3.52795	7.07046	3165.57	2928.39	3446.28	2679.84	1829.03	2990.39	2895.07	3104.31	16.2855	3.89599	29.2606	3.01301
QSER1	848.72	704.154	995.286	826.703	732.331	894.777	967.102	1236	701.112	686.866	1183.74	848.567	876.921	936.651	1180.71	984.886	863.07	734.452	1355.95	1304.39	1019.44	811.185	923.09	931.38	931.28	1514.08	1182.89	1194.25	1142.91	1135.61	980.294	1408.64	1442.19	980.89	1041.2	972.621	1083.68
MPC1	1051.46	8235.37	1213.08	997.717	838.962	891.63	955.614	1329.69	995.982	945.162	1595.52	1365.14	1392.76	1429.01	1795.81	2291.08	2333.9	6769.44	1892.66	2046.86	1873.57	2064.3	2070.64	9533.41	10777.4	929.841	1107.04	1319.37	1412.96	1535.02	1195.85	1025.44	1061.56	11050.4	10625.3	9952.1	1170.05
ACAA1	1693.05	3376.8	1728.03	1519.1	1638.69	1338.49	1095.56	1984.46	1311	1434.34	1591.84	1406.93	1481.86	1344.6	1585.48	1569.3	1335.27	3884.21	1149.91	1192.68	1301.67	1365.5	1293.3	10663.2	10922.8	1113.34	1186.84	1084.02	1109.71	1038.14	936.116	993.992	1061.56	11572.8	11143.5	11416.3	2474.69
BCAT1	425.676	256.59	1206.33	553.916	724.283	693.373	1263.71	3051.23	956.736	948.048	1305.43	914.734	1082.08	904.999	2386.17	2514.6	1241.51	317.112	2780.99	1110.31	752.107	717.392	997.908	193.155	229.285	3960.46	3762.82	2748.97	2656.22	2980.49	4625.74	3923.83	4139.08	125.273	103.244	67.8845	554.394
HDAC7	3776.67	4126.99	3283.01	3547.9	3441.35	4311.29	4754.05	3093.54	3999.84	2874.45	2549.39	2993.78	3318.93	3167.5	2483.39	2984.93	4762.7	3282.85	4367.67	4646.61	5053.27	5442.55	4955.53	1703.12	1695.9	3350.72	3711.45	3007.07	3456.78	3346.61	3818.35	3682.98	3924.09	1995.6	2042.47	2073.99	4197.13
LZTS1	987.394	142.985	731.058	1113.67	1028.08	1343.74	1381.72	386.818	976.889	707.068	829.721	487.549	740.928	637.72	250.99	420.265	4552.58	297.395	2536.7	2106.66	2913.11	3495.7	3379.48	205.503	202.013	373.582	871.563	757.674	1016.74	492.918	973.439	551.206	505.402	103.977	106.166	102.997	1396.03
PRDM6	78.9915	180.201	65.8459	37.5395	54.3213	81.8201	106.527	65.477	49.8521	36.0749	28.272	32.5033	35.1706	28.1347	17.6753	27.94	129.912	123.23	95.0029	118.478	131.805	165.617	171.015	70.5591	77.775	20.5717	30.0267	55.1195	52.3867	54.6806	92.9261	73.6597	54.981	65.1421	62.3358	59.6916	39.1692
WNT8A	0	0	0	1.66842	0	0	1.04439	0	1.06068	0	0	1.16083	0	0	0	0	0	0	0	0	0.744661	0	0.971673	0.881988	0	1.64574	0	0	1.47568	2.37742	1.52338	3.31055	0.704884	0	0.973997	1.17042	0
SPAG4	5199.4	182.159	4599.92	5191.3	6182.56	6757.5	5954.05	2134.55	5586.62	5481.94	4995.54	2676.88	3273.21	3349.2	2789.17	3172.36	1198.58	103.513	2463.91	2189.03	2071.65	1370.57	1178.64	183.454	166.661	499.481	412.472	580.067	655.94	615.752	468.439	609.968	416.587	66.3949	49.6739	93.6338	2279.85
NCKAP1	4157.59	4516.77	6141.39	4851.77	3928.23	3629.46	3945.69	2334	3991.35	4477.62	8352.53	4433.21	3561.61	3883.76	4820.07	5569.38	5256.36	5502.64	5281.92	4888.08	4874.55	4785.99	4648.49	7989.93	8314.86	8878.74	8694.3	9249.57	8816.45	7113.24	8335.93	8772.12	9154.33	7696.8	8239.04	7988.13	6820.46
MRPS35	2736.62	2867.54	3778.54	2962.28	2624.52	2198.65	1947.78	1582.53	2928.55	3598.83	4860.32	2149.86	2141.89	1705.67	3091.42	3295.76	2163.32	3386.36	2222.08	2189.03	2032.18	1744.05	1762.62	4338.5	4614.99	3116.2	2801.96	2876.71	2737.39	2385.34	2665.91	2629.4	2858.31	4577.49	4540.77	4540.07	2323.03
GUCY1B3	1229.63	616.992	1260.36	1565.81	1245.37	1612.28	1883.03	654.77	1174.18	1105.33	2079.83	1013.41	903.885	812.389	767.11	846.35	3037.69	552.071	2705.73	2213.86	2338.23	2423.42	2478.74	810.547	793.911	3900.39	3154.38	3033.32	2831.09	2817.24	2921.08	3061.43	3551.21	701.531	687.642	565.314	1805.8
SFSWAP	3306.23	3803.8	2568.83	3136.63	3391.05	3117.56	2769.71	2659.37	3538.44	2981.23	2371.16	3250.33	3229.84	3299.96	2508.13	2944.18	3883.81	3402.8	3438.61	3887.22	3540.86	4585.73	4170.42	1487.91	1457.52	2563.23	3043.76	2839.96	2859.87	2790.3	3330.87	2632.71	2281.71	1691.19	1735.66	1621.04	4062.55
TNK2	2740.13	1303.52	2372.14	3019.01	3409.16	3107.07	3350.39	4797.96	2852.18	3036.06	2438.77	2522.48	3354.1	3228.46	2241.23	1887.12	1465.18	1189.58	1853.17	1769.28	1744.74	1935.01	1710.15	785.852	768.66	823.691	1287.99	992.15	1334.75	1295.69	1413.7	1344.91	1404.13	1033.51	1193.15	1066.26	2019.72
MON2	3552.86	1743.25	3326.9	2878.86	2711.03	2539.57	2741.52	3196.29	2128.79	2072.14	1861.03	2406.4	2418.57	2718.51	2303.1	1954.64	2664.9	1486.98	2403.45	2960.83	2899.71	3405.29	3301.75	1610.51	1573.68	1348.68	1318.8	1347.36	1403.37	1435.96	1323.82	1361.46	1479.55	1622.29	1751.25	1672.53	2401.37
CDH3	10.5322	743.328	9.28596	26.6948	22.1309	175.179	514.883	68.499	25.4564	33.1889	18.4382	65.0065	83.2371	28.1347	132.565	307.34	46.3166	464.988	48.1184	24.8241	40.2117	54.924	69.9605	597.106	553.516	110.264	52.9418	42.8707	91.4922	103.021	61.6968	51.3135	26.7856	607.576	703.226	553.61	24.1041
ARSF	12.2876	54.8437	11.8185	7.5079	13.0773	3.14693	6.26632	6.04403	1.06068	17.3159	11.0629	8.12581	1.17235	3.51684	7.07014	1.16417	79.0771	78.8673	18.5071	30.4659	32.7651	55.769	35.9519	519.491	566.647	0	0	4.37456	2.21352	0.792473	0	0	0	472.281	370.119	305.48	51.2212
GPBP1	3211.44	3467.88	3445.09	2078.02	1871.07	2011.94	2283.03	2709.74	2001.51	2174.59	2512.52	2313.54	1896.87	1923.71	2391.47	2201.44	4719.77	3434.01	6493.51	5913.77	4815.72	4435.32	4605.73	2939.67	3105.95	2657.04	2444.01	2703.48	2597.94	2879.85	2601.93	2653.4	2776.54	3457.54	3537.56	3499.56	3656.79
DGAT2	193.09	72.472	203.447	162.671	192.136	110.143	90.8617	174.27	121.979	326.117	274.115	130.013	182.887	167.636	203.266	229.341	55.3539	83.7965	14.8056	41.7496	52.1263	73.5137	30.1219	257.541	230.295	646.774	511.243	531.947	472.956	442.992	492.813	484.995	519.5	200.437	179.215	179.075	19.0824
ZNF112	69.337	210.561	75.1318	58.3948	54.3213	73.4283	90.8617	83.6091	76.3692	50.5049	49.1687	88.2231	98.4777	110.194	79.539	94.2976	137.82	307.254	122.147	124.12	154.145	158.857	148.666	250.485	258.577	456.692	405.36	401.585	416.142	465.182	470.724	520.584	496.239	221.734	239.603	258.663	270.167
CS	3097.34	6745.77	3723.67	3101.6	2835.77	2709.51	2703.92	3559.94	2533.97	3300.13	3837.61	3550.98	3716.36	3632.89	4238.55	3995.42	3236.51	5726.09	3756.93	3884.97	3244.49	2974.35	2938.34	6767.5	7127.02	4812.13	4370.46	4539.04	4390.89	4028.14	4523.67	4289.64	4531	6953.92	7166.67	6617.57	3890.8
LTK	17.5537	234.065	23.637	38.3737	59.351	66.0855	62.6632	45.3302	45.6094	40.4039	9.83373	20.8949	45.7218	46.8911	26.513	41.91	25.9825	578.36	23.4423	14.6688	28.2971	35.4894	51.4987	248.721	196.963	5.76007	17.3839	10.4989	23.6109	19.0194	26.6591	24.0015	21.1465	309.425	376.937	464.658	88.3817
MRPS24	6.14378	18.6077	2.53253	4.17106	13.0773	7.34283	13.577	6.04403	7.42478	11.544	6.14608	2.32166	8.20648	3.51684	1.76753	3.4925	6.77803	16.4307	19.7409	5.64183	3.7233	7.60486	12.6318	7.9379	3.0302	11.5201	11.8526	11.3739	5.90272	4.75484	9.90196	13.2422	7.04884	12.5273	3.89599	3.51127	7.03036
ELMO2	1157.66	1036.15	1262.89	968.519	959.676	1212.62	1296.08	1394.16	939.765	1253.96	1057.13	1302.45	1219.25	1259.03	1355.7	1332.97	985.074	1307.88	720.542	710.871	886.891	979.337	1027.06	1325.63	1262.58	1145.43	1117.31	987.776	1193.09	1086.48	998.575	888.882	955.823	1448.16	1545.73	1473.56	857.704
WAPAL	1620.2	1714.84	1787.97	1741.83	1642.72	1681.51	1666.84	2440.78	1737.4	1733.04	2219.96	2108.07	1941.42	1945.98	2474.55	2216.58	1919.31	2065.34	2481.18	2037.83	2137.18	1787.14	1905.45	2527.78	2583.75	2878.39	2372.11	2446.25	2499.8	2108.77	2000.2	2254.48	2313.43	2456.61	2527.52	2464.91	1874.09
VMP1	45843.2	13764.8	26936.9	20814.4	18600	22322.2	33964.5	29614.8	17104.6	12507.9	9147.83	15326.4	16212.5	23052.9	16915.3	24102.9	10508.2	3514.52	29304.1	34384.7	21517	16785.6	18894.2	3419.47	3515.03	6290.82	8289.73	8893.48	6431.75	4756.42	6977.07	7910.55	8844.18	2593.16	2512.91	2505.87	4846.93
APPBP2	1114.66	1420.06	1235.88	1054.44	944.586	1011.21	1232.38	1271.26	954.615	718.612	1173.9	966.972	865.197	811.217	963.306	902.23	1395.15	1820.52	1478.1	1376.61	1427.51	1410.28	1488.6	2263.18	2302.95	1204.68	1094.39	1443.6	1398.94	1517.59	1158.53	1129.72	1194.07	2125.89	2176.88	2303.39	1445.24
POLD1	672.305	345.711	610.341	670.706	640.79	767.851	739.426	1222.91	638.531	650.791	765.802	827.672	895.678	886.243	1366.3	1076.86	423.627	322.041	629.24	681.533	609.877	539.1	562.599	343.975	356.553	861.542	886.577	930.906	834.497	617.337	757.881	785.427	895.908	403.38	418.819	375.706	499.156
SEZ6	43.0065	18.6077	31.2346	40.0421	31.1844	67.1345	46.9974	76.5578	31.8205	36.0749	23.3551	30.1816	36.343	44.5466	17.6753	15.1342	7.90771	16.4307	6.16902	13.5404	11.9146	8.44985	12.6318	4.40994	4.04026	2.4686	4.74105	6.9993	3.6892	7.13226	6.09351	3.31055	6.34396	6.26367	1.94799	3.51127	7.03036
EIF4B	8117.69	7799.56	11273.2	8853.48	8060.67	7048.07	7088.26	10074.4	6428.8	8797.95	16863.6	11142.8	9664.89	8999.58	15344	14411.2	11874	10638.9	23328.8	21309.2	14501.5	10790.5	11768.9	13942.5	14274.2	12682.9	9696.24	11361.6	11131.8	13384.9	10301.8	11876.6	12002.8	17217.6	17382	17103.4	15093.2
SLC6A16	614.378	418.183	617.094	322.84	387.29	397.562	384.334	171.248	323.508	330.446	164.715	147.425	180.543	215.699	102.517	98.9543	224.805	246.46	315.854	415.239	152.655	182.517	316.765	164.05	196.963	62.5379	71.1158	115.488	118.792	122.041	121.87	108.42	86.7008	152.834	207.461	152.155	18.0781
GLTSCR1	1124.31	723.741	868.659	987.706	1092.46	1095.13	1055.88	1169.52	1064.93	917.745	886.265	1093.5	1125.46	1254.34	1092.34	1211.9	891.311	525.782	857.494	797.755	898.061	1043.56	948.353	547.715	643.412	450.109	452.771	527.572	548.215	533.334	609.351	480.029	480.731	640.147	648.682	582.87	883.817
SPHK2	860.13	1048.89	723.46	933.482	930.503	804.565	636.032	701.108	1052.2	1043.29	993.207	791.686	908.574	779.565	788.32	841.693	507.223	1322.67	425.662	399.442	457.966	425.027	451.828	2462.51	2543.34	324.21	369.012	334.216	395.482	361.368	373.228	286.362	332.705	2397.73	2359.99	2188.69	511.208
RPL18	24932.4	12628.7	18688.4	28155.5	33542.4	24464.2	15955.1	16520.4	36353.9	48452.9	38539.6	26147.7	22118.8	23676.5	23821.1	24111.1	32596.7	17462.5	60798.2	62914.3	31265.3	26788.5	26568.5	17266.7	17275.1	18476.7	18630	18479.9	21573.7	26604.1	23274.2	19682	18765.4	19076.6	18469.9	19095.4	34506
CA11	100.934	443.646	69.2226	164.34	118.702	123.779	97.128	242.769	155.92	142.857	136.443	417.899	302.467	425.537	316.389	372.534	311.79	688.446	268.969	414.111	376.798	381.088	303.162	416.299	400.996	297.878	371.382	417.333	420.569	809.115	511.855	307.881	298.166	585.027	551.282	587.552	186.807
ISOC2	3840.74	2063.49	3828.35	3864.07	4622.34	3249.73	2125.33	1692.33	4740.19	6647.88	5363.07	3151.65	2655.38	2699.76	3218.68	3116.48	3267.01	2781.72	1833.43	2057.01	2563.12	2970.12	2460.28	6868.93	6997.73	1751.06	1939.88	2429.63	2451.84	2742.75	2639.25	1818.32	1736.13	7237.04	6918.3	7015.51	5566.04
U2AF2	5037.02	4465.84	4902.14	5736.87	5763.08	5915.18	5490.34	5461.79	5394.63	5330.43	6768.07	5342.14	5981.35	5877.81	5991.94	6917.49	3941.43	4584.16	3500.3	3768.74	4067.34	4288.3	4363.78	4884.45	4979.62	4817.07	4801.9	4379.81	4660.94	4150.18	4335.54	4335.16	4436.54	5295.31	5327.76	4890.03	6272.09
EPN1	10088.1	9688.73	10402.8	14009.7	15376.9	10314.6	7174.94	7688.01	18696.7	19369.3	19484.3	11862.5	11013.1	11003	11197.3	10081.7	6743.01	8834.78	6756.31	6040.15	5503.04	5521.97	4991.49	10285.7	10843.1	6270.25	6470.75	6434.98	6681.88	6436.47	7459.98	5922.57	5557.31	12125.2	11959.7	10448.4	9526.14
MED29	3550.23	2535.54	3891.66	3765.63	3446.38	2778.74	2594.26	2324.94	3929.83	4486.27	5556.06	3003.07	2570.97	2705.62	3017.18	2692.72	2769.96	2867.15	2742.75	2834.46	2502.8	2461.44	2149.34	3796.96	3850.37	3570.42	3666.41	3922.23	3912.77	4580.49	4263.17	3532.35	3422.92	4015.01	3927.16	3759.4	3821.51
AHRR	595.947	25.4631	440.661	586.451	520.076	785.683	706.006	417.038	525.038	382.394	424.08	718.554	630.726	777.221	523.19	518.055	81.3364	49.2921	172.733	97.0395	104.253	88.7234	82.5922	34.3975	12.1208	21.3946	45.8302	39.371	59.7651	34.8688	67.0287	43.8648	33.1296	15.0328	14.61	14.0451	31.1345
GSC2	0	0	1.68836	0	0	0	0	0	1.06068	0	0	0	0	0	0	0	0	0	0	0	0	0	0.971673	0	0	0	0	0	0	0	0	0	0	0	0	0	0
ZNF275	594.192	729.617	522.546	578.943	724.283	730.087	634.987	484.53	538.827	658.006	770.719	506.122	572.109	430.226	549.703	461.011	624.709	713.092	651.449	696.202	701.47	594.869	563.571	1022.22	968.653	1174.23	1068.32	1105.89	1067.65	1088.07	1214.13	1010.54	1101.73	1141.24	1118.15	1122.44	586.533
MTMR1	998.804	749.204	1116	991.043	1016.01	987.087	927.416	1232.98	900.52	917.745	1205.86	987.867	872.231	928.445	878.465	874.29	649.562	716.378	821.714	856.43	830.297	700.492	754.018	954.312	980.773	1292.73	1226.35	1345.61	1424.03	1474.79	1333.72	1289.46	1346.33	968.363	1066.53	964.428	901.895
GPC1	5577.68	3530.56	5625.6	4151.04	5439.17	3932.61	3521.67	2189.95	5866.64	6352.07	6218.61	7603.44	4694.11	6868.38	4266.83	4906.97	3347.22	2214.86	5564.46	3462.96	2408.23	2353.28	2156.14	1647.55	1891.85	4231.19	5341.59	5015	4692.66	2163.45	5376.76	4340.96	3994.58	1763.85	2044.42	1790.75	2552.02
ADCK1	146.573	527.871	188.252	162.671	202.196	186.718	238.12	328.392	160.163	173.159	103.254	174.125	237.988	213.355	222.709	203.729	192.044	404.195	134.485	103.81	162.336	213.781	178.788	412.771	408.066	195.843	225.99	223.103	233.895	225.062	262.021	162.217	200.892	524.895	472.389	513.816	156.677
HAGH	6052.5	3266.14	7167.07	5898.71	6238.9	4611.3	2860.58	2961.58	6301.52	8649.32	8448.4	3802.88	3650.71	3852.11	4512.51	4702.07	2359.89	4957.14	1733.49	1807.64	2257.07	2510.45	2250.4	8851.64	9211.8	1738.72	1807.13	1959.8	2051.93	2547.8	2282.78	1511.26	1421.05	11537.7	11560.4	11747.5	4026.39
RNF4	2309.18	1781.44	2720.78	2361.65	2378.06	2356	2429.24	2405.53	2231.68	2623.37	3059.52	2422.65	2614.35	2274.22	2716.7	2656.63	2098.93	1915.82	2154.22	1785.08	2161.01	1905.44	2169.75	2402.54	2496.88	2044.83	1814.24	1666.71	1802.54	1628.53	1580.51	1747.14	1786.88	2365.16	2579.14	2503.53	1744.53
CASP8	2277.59	1214.4	2077.52	2028.8	2178.89	2352.85	2533.68	2194.99	2177.58	2070.7	1837.68	2796.44	2293.12	2668.11	2474.55	2562.33	1542	732.809	1338.68	1219.76	1552.62	1474.5	1479.86	829.069	862.596	2323.78	2607.58	2278.27	2310.92	1534.23	2400.84	2548.29	2374.76	695.267	713.94	641.392	1261.45
LIMCH1	1817.68	4190.65	2192.33	2959.78	2946.43	3112.31	3507.05	1040.58	4308.5	2784.98	3969.14	1718.03	1560.4	1457.14	1604.92	1654.28	2301.14	6363.6	2381.24	1924.99	1884.74	2156.4	2046.34	4153.28	3999.86	5378.26	4672.31	4513.67	4368.01	5008.43	5725.62	4096.8	4565.54	4170.35	4439.48	5133.47	4856.98
ASUN	1304.24	619.93	1456.21	1266.33	1058.26	1241.99	1521.67	1132.25	1077.65	1010.1	1650.84	1106.27	1124.29	1135.94	1445.84	1484.31	885.663	642.44	1225.17	1024.56	1061.89	855.969	864.789	819.367	877.747	1138.03	1082.54	1127.76	967.308	991.384	1012.28	1075.93	1163.06	797.991	811.34	779.501	1181.1
TM7SF3	7440.12	1486.66	11161.7	7469.53	7393.73	5399.08	4224.55	4015.25	6754.43	8549.75	10992.9	5229.54	4977.82	4905.99	6486.85	6515.85	3550.56	2366.02	2611.96	2894.26	4386.8	3447.54	3361.99	8503.25	8253.24	2785.41	2963.16	3851.36	3681.82	5464.89	3323.25	2614.5	2708.87	7546.47	7356.6	7514.11	5110.07
DLX3	2.63305	50.9263	5.90924	5.00527	2.0119	0	1.04439	2.01468	1.06068	4.32899	1.22922	1.16083	3.51706	8.20595	3.53507	5.82084	23.7231	26.2891	4.93522	1.12837	8.93593	38.8693	13.6034	11.4658	23.2315	0	4.74105	0.874912	3.6892	3.16989	2.28507	0	0.704884	8.76914	19.4799	24.5789	27.1171
SPA17	71.97	151.8	119.029	62.5658	55.3272	41.959	49.0862	32.2348	72.1265	109.668	156.11	94.0273	90.2713	90.2655	116.657	112.924	72.299	75.5812	49.3522	38.3645	83.402	82.8085	68.0171	201.093	205.043	165.396	149.343	156.609	161.587	206.835	174.427	177.942	179.041	202.943	217.201	221.21	79.3427
TSPAN32	100.934	16.649	122.406	142.65	192.136	230.775	208.877	393.869	138.95	126.984	45.481	112.601	216.885	133.64	116.657	68.6859	77.9474	29.5752	72.7944	60.9318	164.57	141.957	192.391	24.6957	22.2214	48.5492	76.647	82.2417	89.2787	122.041	98.2579	122.49	111.372	28.8129	18.5059	19.8972	145.629
WISP2	177.292	30.3599	176.433	89.2606	57.3391	240.216	778.068	194.416	82.7333	150.072	77.4406	1304.77	499.423	1560.3	514.352	1001.18	108.449	6.57227	1246.14	673.635	90.8486	461.362	292.474	4.40994	12.1208	151.408	52.9418	62.9937	84.8516	61.8129	70.8371	100.972	90.9301	7.5164	1.94799	3.51127	2.00868
DMRT3	1.75537	0	0	0.834211	1.00595	40.9101	45.953	14.1027	4.24273	0	7.3753	2.32166	16.413	3.51684	12.3727	5.82084	16.9451	0	41.9493	13.5404	1.48932	5.06991	22.3485	1.76398	0	9.87441	18.174	8.74912	9.59192	4.75484	9.14027	24.0015	5.63907	0	0	0	0
ST3GAL6	533.631	911.776	462.609	478.003	491.909	503.509	360.314	892.502	470.943	406.925	398.266	398.165	583.832	657.648	609.799	658.919	530.946	2656.84	650.215	353.179	356.693	594.024	525.675	1770.15	1571.66	542.27	556.283	430.457	433.85	436.653	498.145	606.658	864.893	1677.41	1930.46	2162.94	255.102
ATP2C2	73.7254	84.2242	91.1712	80.0843	106.631	102.8	84.5954	80.5871	97.5829	59.1628	40.5641	42.9507	46.8942	71.509	26.513	34.925	13.5561	67.3658	17.2733	23.6957	9.68059	11.8298	12.6318	116.422	124.238	20.5717	22.9151	18.3732	10.3298	12.6796	16.7572	29.7949	21.1465	227.998	210.383	194.29	23.0998
NGFR	299.29	245.817	132.536	278.627	159.946	412.248	384.334	40.2936	219.561	38.9609	132.755	23.2166	25.7918	76.1981	38.8858	36.0892	1462.93	356.546	267.735	459.245	1629.32	1763.48	1406.01	533.603	566.647	46.0806	53.7319	76.9923	178.557	204.458	111.968	49.6582	39.4735	233.008	187.981	255.152	1304.63
CDON	578.393	64.6372	521.702	608.14	605.581	380.778	304.961	281.048	368.057	555.553	728.925	557.199	402.117	662.337	339.367	376.026	1096.91	83.7965	1401.6	2665.2	1711.98	977.647	948.353	102.311	95.9562	117.67	149.343	192.481	247.914	587.223	214.035	112.559	152.255	119.01	98.3737	153.325	902.9
TAF2	1362.16	791.316	1621.67	1220.45	1010.98	1108.77	1232.38	1523.1	771.117	893.214	1341.08	1766.78	1643.64	1876.82	2144.02	2273.62	1040.43	655.584	1190.62	1087.75	1133.37	1116.22	1111.59	1071.62	1092.89	1255.7	1111.78	1247.62	1161.36	1076.97	994.004	1197.59	1248.35	948.319	960.361	964.428	945.082
HIPK2	14964.5	8158	17465.2	13714.4	12682	7269.41	5047.52	6279.75	9261.89	15445.8	21092.1	9024.3	7141.98	8992.55	7519.09	5761.47	24252.9	11375	16625.5	20064.6	23527.6	21946.8	18818.4	14790.1	13635.9	11055.2	14178.1	17444	14666.8	8637.16	13874.9	15948.6	11338.1	12549.9	13645.7	13078.3	18344.2
TNPO3	1503.47	1721.7	1579.46	1584.17	1589.4	1346.89	1344.13	1528.13	1496.62	1649.34	2054.02	1653.02	1524.06	1586.09	1604.92	1523.9	1842.5	1680.86	1988.89	2169.85	1706.76	1562.38	1510.95	1907.74	1852.46	4557.86	4510.32	4293.19	3642.72	3272.91	3823.68	4494.9	4473.2	1995.6	1931.44	1910.13	1373.93
MEF2BNB-MEF2B	6.14378	6.85546	1.68836	4.17106	6.0357	13.6367	7.31071	5.03669	4.24273	1.443	0	1.16083	1.17235	2.34456	1.76753	0	1.12967	1.64307	4.93522	4.51347	4.46796	2.53495	6.80171	0.881988	0	0	0.790175	1.74982	2.21352	0	1.52338	0	1.40977	0	0.973997	3.51127	4.01735
RFXANK	1312.14	736.472	1091.52	1466.54	1649.76	1381.5	1114.36	985.177	1696.03	1842.71	1735.65	1191.01	1316.55	1308.26	1361	1435.42	1221.18	957.909	1138.8	1191.56	1213.05	1199.03	1064.95	907.566	918.149	1614.47	1617.49	1617.71	1463.87	1510.45	1587.36	1584.92	1456.29	934.539	1017.83	962.087	1577.81
TMEM161A	1696.56	1070.43	1522.9	1697.62	1662.83	1377.31	1172.85	1043.6	1798.92	2138.52	2094.58	1759.82	1783.15	1923.71	2138.72	2230.55	1250.55	1064.71	1548.42	1451.08	1277.84	1180.44	1185.44	1188.92	1111.07	1387.35	1498.96	1422.61	1383.45	1844.88	1634.59	1354.84	1423.16	1335.41	1198.99	1178.62	1224.29
LPAR2	536.265	538.643	615.406	809.185	870.146	1138.14	1108.09	1327.67	869.76	818.179	708.029	725.519	1075.05	929.617	936.793	1266.61	268.862	264.534	178.902	180.539	332.863	381.088	392.556	162.286	170.701	1686.06	1365.42	1283.5	1205.63	1025.46	1208.04	1343.25	1348.44	214.217	181.163	160.348	218.946
CTSA	9801.09	5252.26	10849.4	11104.2	11252.5	9401.97	8207.84	12924.2	10932.5	13845.5	13442.7	10497.4	10306.2	10286.7	12667.9	13360	5580.58	5952.84	5332.5	4974.97	4831.36	4977.8	4808.81	16457	15049	9961.64	9132.85	9911.88	10338.6	8626.07	8783.8	10526.7	11005.4	11312.2	9983.47	9913.48	5543.94
SUGP2	2343.41	1852.93	2339.22	1730.15	1645.73	1919.63	1936.29	2790.33	1178.42	1141.41	942.809	934.469	1281.38	1261.37	1304.44	1109.45	1157.91	1258.59	1152.37	1560.53	1806.55	1752.5	1595.49	1481.74	1354.5	1821.83	1972.28	1685.08	1495.6	1491.43	1595.74	1994.6	2117.47	1337.92	1419.11	1316.73	1445.24
SLC12A2	305.434	713.947	331.762	292.808	238.41	383.925	533.682	378.759	270.474	215.006	354.014	322.711	358.74	298.931	358.809	459.846	1614.3	1270.09	1146.2	904.95	1828.14	1700.11	1922.94	1361.79	1245.41	529.104	376.914	409.459	430.161	424.766	357.994	399.749	441.963	835.573	1027.57	1069.77	1103.77
SNX24	1247.19	1158.57	1537.25	720.759	691.087	577.986	645.431	1055.69	747.782	906.201	762.114	796.33	767.892	752.603	828.974	782.321	895.83	1176.44	815.544	865.457	877.955	806.115	843.412	1098.08	1028.25	1111.69	1167.09	1190.76	1043.31	923.231	1125.01	1086.69	1197.6	975.879	955.491	1081.47	806.483
EYA2	183.436	228.189	264.228	193.537	173.023	184.62	216.188	426.104	148.496	223.664	184.382	191.537	173.508	205.149	293.411	152.506	153.635	289.18	225.786	186.18	85.636	66.7538	56.3571	623.566	624.22	69.1209	88.4996	80.4919	90.0165	30.114	51.0332	62.9004	67.6689	549.95	539.594	517.327	16.0694
CNN2	1210.33	2450.34	1200.42	1734.33	1805.68	2619.29	2623.5	2936.39	2156.37	1653.67	1939.7	3335.07	3130.19	2867.39	3397.2	3677.61	1807.48	2264.15	2220.85	1790.72	1325.5	1531.11	1754.84	2258.77	2287.8	6517.94	6370.39	5444.58	6240.65	5995.85	6120.93	5539.37	5461.44	1985.58	2026.89	1810.64	1558.73
ABCA7	1083.94	1127.23	1309.32	1288.02	1552.18	5436.84	5653.27	2623.11	1652.54	1056.27	555.606	1237.45	2242.71	1706.84	1274.39	1003.51	443.961	808.39	265.268	245.984	679.875	704.717	736.528	757.628	665.633	1739.54	2212.49	1001.77	1011.58	1248.94	2362	1941.64	1577.53	725.333	660.37	746.73	601.598
SNCAIP	6.14378	82.2655	8.44178	5.00527	5.02975	14.6857	54.3081	15.1101	10.6068	1.443	2.45843	8.12581	15.2406	3.51684	3.53507	4.65667	35.0198	47.649	9.87043	12.412	32.7651	40.5593	42.7536	31.7516	44.4429	2.4686	13.433	98.8651	332.028	217.138	79.9774	16.5527	4.93419	97.7132	58.4398	42.1352	50.2169
DDX20	438.842	484.779	483.714	449.64	383.267	381.827	364.491	487.552	361.693	317.459	414.246	383.074	413.841	396.23	471.932	389.996	367.143	658.871	397.285	331.74	370.096	387.003	342.029	569.765	592.908	515.115	489.909	451.455	433.112	435.86	413.597	576.035	606.201	527.401	524.01	492.748	551.381
BTBD1	1789.6	2257.41	2476.82	2117.23	2001.84	1800.04	2047	2790.33	1843.47	2007.21	3205.8	2762.78	2349.4	2138.24	3418.41	3470.38	1614.3	2576.33	1990.13	1683.52	1781.97	1429.71	1740.27	3390.36	3324.12	5086.15	4901.46	5287.97	4624.78	4767.52	4332.49	4806.91	5378.27	3263.37	3386.59	3328.68	1865.06
FAR2	351.951	128.295	434.752	341.192	271.606	332.525	311.227	529.86	298.052	295.814	494.145	558.359	568.592	613.102	687.571	562.293	425.886	208.67	272.671	286.605	412.542	354.894	441.14	218.733	209.084	340.667	161.196	259.849	323.912	232.195	243.741	324.434	425.75	155.339	154.866	134.599	222.963
BCAS1	659.14	332	1085.61	501.361	199.178	862.258	598.434	92.6752	173.952	262.625	255.677	134.656	119.58	58.6139	91.9118	124.566	6.77803	42.7198	13.5718	7.89857	8.93593	11.8298	16.5184	30.8696	50.5033	32.0918	11.8526	11.3739	11.8054	9.50968	11.4253	22.3462	11.983	51.3621	29.2199	18.7268	5.02169
POU1F1	1.75537	3.91741	2.53253	8.34211	5.02975	3.14693	1.04439	3.02202	7.42478	4.32899	3.68765	0	2.34471	4.68911	1.76753	6.98501	0	3.28614	0	5.64183	1.48932	3.37994	0	4.40994	3.0302	1.64574	2.37053	1.74982	0.73784	0	0.761689	0	1.40977	7.5164	0.973997	4.68169	3.01301
CHI3L2	68.4593	19.587	80.1969	127.634	110.654	170.983	151.436	205.497	92.2794	184.703	233.551	248.418	481.837	338.789	540.865	998.856	54.2243	21.3599	262.8	117.35	61.8068	33.7994	58.3004	22.0497	20.2013	306.93	480.427	643.06	537.885	182.269	236.124	436.992	343.279	15.0328	7.79198	14.0451	26.1128
SBNO2	9368.39	3747.98	7698.06	7830.74	8090.85	8795.67	8489.82	8553.31	8007.1	7784.96	7666.62	7350.38	7969.66	7853.1	7570.35	8712.63	4283.72	1825.45	6848.85	6019.84	4552.86	4288.3	4244.27	2025.93	1947.41	7442.84	7486.12	7058.79	6903.23	5849.24	6982.41	7052.29	6616.75	1613.52	1749.3	1653.81	3861.68
PMS1	599.458	594.466	515.793	533.061	571.379	615.749	642.298	661.822	491.096	477.632	319.596	549.073	553.351	608.413	440.116	440.055	573.873	432.127	690.93	716.513	597.963	621.064	705.435	431.292	398.976	771.027	760.149	712.178	621.261	473.106	650.483	840.879	857.139	372.062	362.327	367.513	631.728
HMG20B	3385.22	3602.06	2752.86	3305.14	3897.05	3387.14	3088.25	2615.05	4190.76	4640.67	3996.18	3123.79	3124.32	3178.05	3018.95	3102.51	3663.53	3509.59	3082.04	3053.36	3173.74	3604.7	3324.09	3339.21	3453.41	4242.71	3805.48	3382.41	3618.37	4050.33	4114.65	4014.87	3769.02	4092.68	4176.5	4004.02	4296.56
CALCRL	694.248	422.101	852.62	778.319	445.635	833.936	1165.54	285.077	650.199	417.026	1073.11	572.289	554.523	560.349	341.134	613.517	4865.5	977.626	3316.47	1895.66	3998.08	4226.61	4550.35	1109.54	1028.25	3148.29	3330.59	3720.13	3142.46	2599.31	2911.18	3339.51	3097.26	1216.4	1072.37	1206.71	4791.7
TAF11	532.754	827.552	460.921	593.124	685.051	636.729	726.893	753.489	598.225	623.374	569.127	539.786	660.035	524.009	597.427	621.666	1047.21	676.944	1005.55	1000.86	904.018	951.453	1166.01	697.653	719.167	742.227	802.028	781.296	750.383	861.418	718.273	768.047	627.347	587.532	558.1	710.447	1015.39
ANKS1A	866.273	1330.94	910.024	1079.47	922.455	889.532	873.108	1484.82	922.794	953.82	1020.25	875.266	930.849	934.306	1021.63	685.695	1689.99	2343.02	1228.87	1286.34	1676.98	1629.98	1646.99	2455.46	2208	967.692	938.728	1063.02	1170.95	1286.18	955.92	926.126	890.974	2506.72	2572.33	2515.24	1522.58
AP3D1	10530.4	10057.9	10287.2	12366.3	14749.2	10690.1	7680.42	7748.45	14474.1	16135.6	15499.2	11361	10875.9	11413.3	8770.5	9017.65	6318.26	9735.18	5943.23	6446.36	6001.22	6439.63	5882.51	11346.8	10600.6	13817.6	17685.7	15395.8	16098.9	12402.2	18439	15014.2	12804.2	9846.49	10143.2	9228.78	7569.69
ZNF76	1297.22	1611.03	1160.74	1273.84	1410.34	1251.43	1248.04	1592.6	1169.93	1177.48	908.391	903.126	1267.31	1150.01	942.096	777.664	1274.27	1654.57	874.767	1242.33	1537.72	1745.74	1656.7	1768.39	1698.93	1284.5	1391.5	1458.48	1414.44	1834.58	1586.6	1358.15	1399.2	1826.49	1791.18	1882.04	1715.41
SLC9A3R2	1526.29	6641.96	1532.18	2165.61	1532.06	2499.71	2414.62	715.211	2837.33	1316.01	2159.73	1425.5	1699.91	1484.1	837.811	1390.02	8998.97	21259.7	3896.35	2701.31	7577.67	9237.37	11079	10742.6	9933.99	1803.73	2847.79	2318.52	3366.76	2908.38	3637.83	1848.94	1569.78	16057.5	13466.5	14725.1	16676
NTHL1	612.623	409.369	482.026	759.132	671.974	547.566	471.019	295.15	788.088	942.276	935.434	726.68	682.31	710.401	687.571	710.142	489.148	548.785	346.699	344.152	385.734	457.982	488.752	364.261	350.493	933.132	813.09	872.287	745.956	732.245	1017.62	713.423	623.823	613.839	609.722	573.507	539.329
UHRF1BP1	644.22	642.455	747.942	669.037	679.016	666.1	763.447	1554.32	621.56	694.081	851.847	860.175	812.441	863.969	1064.06	752.053	614.542	660.514	785.933	798.884	673.173	550.93	569.401	958.721	934.31	1082.89	1044.61	1157.51	1252.85	1206.14	994.766	960.059	1141.91	904.474	1024.64	987.837	583.52
GNAI3	1474.51	2288.74	1918.82	1631.72	1344.95	1472.76	1785.9	2820.55	1453.14	1494.94	2786.63	2335.59	2056.31	1847.51	3801.97	3629.88	1884.29	2931.23	2371.37	1716.25	1608.47	1462.67	1685.85	2571.88	2904.95	3925.08	3097.49	3140.06	2983.09	2573.95	2283.54	3135.09	3484.95	2883.79	2952.19	2902.65	3458.94
IPO5	2346.93	3459.07	2965.6	2732.04	2323.74	2116.83	1897.65	2500.22	2160.61	2277.05	4326.84	2067.44	1905.08	1799.45	2981.83	2952.33	4857.59	4127.39	8217.14	7536.36	5163.48	4361.81	4724.28	5379.25	5140.22	6104.03	5158.27	6848.81	6281.23	6431.71	5609.84	6409.22	6849.36	5859.04	6111.83	6154.08	4087.65
OAT	1341.1	2703.01	1571.01	1349.75	1161.87	1243.04	1523.76	1605.7	1143.42	1311.68	2089.67	1658.83	1670.6	1444.25	2140.48	3001.22	1693.38	3146.48	1817.39	1414.97	1396.24	1668.84	1658.65	4669.25	4832.15	2899.79	2444.01	2813.72	2925.54	3123.93	2669.72	2289.24	2275.37	6313.78	6206.31	5938.72	1697.33
WDR3	861.007	535.705	778.332	709.914	746.414	712.255	738.382	635.631	668.23	689.752	891.182	715.072	804.235	854.591	889.07	958.11	782.863	584.932	1126.46	974.909	583.069	652.328	833.696	877.579	904.008	1625.16	1409.67	1533.72	1390.09	1088.86	1157.77	1668.52	1861.6	810.519	874.649	833.341	796.44
PKN2	2083.62	1492.53	2166.16	1945.38	1797.63	1724.52	2041.78	2466.97	1567.69	1600.28	2026.98	1628.65	1560.4	1629.47	1567.8	1324.82	1527.32	1634.85	1395.43	1311.16	1488.58	1645.19	1525.53	1710.18	1887.81	1408.75	1223.19	1363.11	1249.16	1470.04	1208.8	1380.5	1591.63	1753.83	1814.56	1843.42	2131.2
WDR18	1536.82	2085.04	1508.55	1802.73	1816.74	1894.45	1820.37	1003.31	2091.67	2326.11	2205.21	1636.77	1763.22	1708.01	1675.62	1750.91	1442.59	1947.04	1309.07	1279.57	1219.01	1362.12	1202.93	3239.54	3211	2622.48	2455.07	2241.52	2238.61	2463.01	2523.48	2417.53	2245.76	2460.37	2202.21	2131.34	1971.51
TRAM2	761.829	797.192	650.861	969.353	1067.31	1230.45	1451.7	1162.47	779.602	632.032	1223.07	926.343	954.296	669.371	823.671	1065.21	1732.92	1539.56	2785.93	1865.19	1276.35	1305.5	1289.41	1146.58	1179.76	2479.3	2331.81	3130.44	3747.49	2661.12	2582.13	2449.81	2185.85	1240.21	1436.65	1436.11	1040.49
NTN1	69.337	178.242	48.9623	44.2132	53.3153	88.114	66.8408	51.3743	55.1555	47.6189	62.69	46.4332	75.0307	51.5803	53.026	55.8801	45.1869	734.452	39.4817	33.851	34.2544	67.5988	70.9322	644.734	531.294	25.5089	15.8035	28.8721	42.0569	8.7172	34.276	18.208	33.1296	338.238	434.403	661.289	82.3557
GLP2R	46.5172	11.7522	49.8065	35.8711	42.2499	32.5183	36.5535	15.1101	33.9419	40.4039	62.69	55.7199	21.1024	23.4456	72.4689	61.7009	7.90771	0	9.87043	4.51347	0.744661	5.06991	1.94335	0.881988	1.01007	27.1546	14.2232	29.747	24.3487	61.8129	45.7014	41.3818	51.4566	0	0	0	0
MCM10	42.1288	12.7316	22.7928	15.0158	22.1309	50.3509	66.8408	61.4477	21.2137	14.43	27.0428	62.6848	38.6877	46.8911	123.727	123.402	56.4836	3.28614	46.8846	37.2361	67.0195	65.0638	77.7339	10.5839	14.1409	517.584	468.574	398.96	301.039	167.212	312.293	374.092	352.442	3.7582	3.89599	7.02254	42.1822
DGKA	560.84	318.289	463.454	705.743	969.735	1748.64	1637.6	2395.45	886.731	629.146	319.596	1026.17	1447.86	923.756	926.188	870.798	578.392	197.168	460.209	339.638	778.915	657.398	925.033	149.938	156.56	449.286	592.632	465.453	830.808	677.564	784.54	628.176	577.3	162.855	130.516	153.325	481.078
ERBB3	11982.1	3936.99	9941.88	11455.4	13830.8	8628.88	5344.13	4690.17	14195.1	15476.1	12874.8	13585.2	12364.8	13631.3	9251.27	10561.3	7332.7	4140.53	1354.72	2386.5	3877.45	8714.33	5197.48	7006.52	6733.1	627.025	843.117	1446.23	1816.56	2686.48	2093.88	1067.65	852.91	5936.7	6028.07	6192.71	17873.2
ROPN1	0.877683	0.979352	0	0	0	1.04898	0	0	1.06068	1.443	0	2.32166	0	1.17228	0	1.16417	0	0	0	0	0	0	0	0	1.01007	0	1.58035	0.874912	0	0.792473	0	0	0.704884	0	0	0	0
ANKRD44	287.002	163.552	406.894	365.385	470.784	629.386	624.543	1596.63	284.263	340.547	196.675	558.359	712.791	631.858	634.545	334.116	289.196	269.463	202.344	168.127	349.991	288.14	300.247	182.572	170.701	454.223	526.257	511.824	531.983	489.748	413.597	564.448	515.27	155.339	163.632	208.335	264.141
KARS	4238.33	3887.05	5625.6	4333.73	3426.26	3451.13	3783.81	3669.74	3954.23	3852.8	7678.91	4712.97	3906.28	3754.81	6554.02	6514.68	4773.99	4171.75	6140.64	6004.04	4450.84	3995.93	4055.76	4768.03	5085.68	6457.87	6462.84	6436.73	6420.68	5526.71	5852.06	5819.11	6155.76	5466.93	5313.15	5222.43	5457.57
ADAT1	919.812	1043.01	1098.28	1012.73	1023.05	1061.56	950.392	937.832	1185.84	1165.94	1087.86	1025.01	971.881	924.928	1035.78	1038.44	936.498	921.761	779.764	833.863	835.509	795.976	823.979	718.821	744.418	736.467	901.59	790.046	759.238	714.018	839.382	737.424	624.528	666.454	742.186	745.559	337.457
PDIA5	5115.14	717.865	4783.96	5514.97	5211.82	4580.88	4879.38	2377.32	4447.44	5096.66	7360.55	4168.54	3699.95	3793.49	5109.94	6976.86	1670.79	1209.3	1465.76	1623.72	1574.96	1671.38	1581.88	1075.14	1044.41	3332.61	3851.31	4420.06	4766.45	3706.4	4189.29	5280.32	5099.13	1018.47	977.893	962.087	3762.25
TBC1D22B	511.689	714.927	443.193	610.643	601.558	468.892	430.287	430.134	680.959	610.387	612.15	560.681	555.696	539.248	480.769	518.055	669.896	695.018	621.837	667.993	635.94	643.033	658.794	797.318	806.032	721.655	688.243	718.303	682.502	639.526	767.021	681.973	673.165	878.166	906.791	868.454	743.21
NDUFB4	3943.43	4345.38	4147.45	3178.34	3019.86	2808.11	2684.07	2473.02	3197.96	3608.93	4897.2	3913.16	3315.42	3500.42	4314.55	5146.79	3260.23	4653.17	2741.51	2623.45	2922.79	2998.01	2950.97	6232.13	6277.56	4392.47	4959.93	4843.51	5230.55	5449.84	6347.92	5091.62	5565.06	6234.86	5986.19	6140.04	5413.38
SPEN	2944.63	1982.21	2863.45	2341.63	2212.08	2307.75	2346.74	3491.44	2181.83	2141.41	2314.61	2235.76	2282.57	2453.58	2499.29	1954.64	1767.94	1948.68	1344.85	1515.4	1692.61	1815.03	1631.44	2628.33	2486.78	3293.94	2722.94	2521.5	2707.87	2624.67	2620.21	3087.91	3111.36	2586.89	2891.8	2500.02	2589.18
MYLK	4649.97	3703.91	5658.52	4352.08	3152.64	3326.3	5138.38	2119.44	2895.67	2909.08	4280.13	3032.09	3044.6	2879.12	2308.4	2823.11	6142.03	5013	4959.89	4265.23	5696.65	7546.56	6266.32	5487.73	5801.82	7618.93	8948.74	8678.25	9161.76	10024	10300.3	8092.63	10239.2	6951.42	6545.26	5798.27	6245.98
ZC3H15	2188.06	3380.72	2356.1	2193.98	2253.33	2097.95	2049.09	2031.8	2463.97	2673.87	2776.8	2673.39	2084.45	2310.56	2706.09	3234.06	2662.64	3476.73	3199.25	2818.66	2355.36	2174.99	2303.84	3151.34	3153.42	6703.08	6688.04	6567.96	5583.97	3541.56	6034.86	5986.3	5831.51	2982.76	3015.49	3107.47	2077.97
MAP2K4	595.947	1157.59	655.926	543.906	571.379	574.839	585.901	865.304	548.373	572.869	857.993	643.1	665.897	624.825	779.483	660.083	1043.82	1166.58	890.807	801.14	1000.08	1004.69	1049.41	1483.5	1684.79	1200.56	1058.04	1025.4	1097.91	1105.5	913.265	957.576	953.709	1435.63	1496.06	1466.54	900.891
TMEM206	562.595	232.106	814.632	700.737	639.784	456.305	294.517	704.13	500.642	914.859	1188.65	452.724	490.044	454.844	731.759	704.322	334.383	322.041	312.152	274.193	254.674	258.565	287.615	793.79	905.019	484.669	355.579	277.347	273.001	240.912	248.311	453.545	516.68	740.366	675.954	682.356	277.197
SNAP91	0	6.85546	0.844178	0	0	2.09795	5.22194	0	0	0	0	1.16083	0	0	0	0	0	1.64307	0	0	0	0.844985	2.91502	1.76398	0	4.93721	2.37053	1.74982	2.21352	2.37742	0	4.13818	1.40977	3.7582	1.94799	7.02254	0
SLK	2468.05	2452.3	2665.07	2475.1	2206.05	1866.13	1845.43	2290.69	2127.73	2617.59	2953.81	1911.89	1790.18	1855.72	2174.07	1877.8	2836.61	5206.88	3375.69	2969.86	3033.75	2632.13	2736.23	4527.25	4363.48	3398.44	2537.25	3021.95	2930.7	3102.53	2489.2	2482.91	2482.6	4564.96	4864.14	5028.14	4740.47
CYB5R4	432.698	440.708	594.301	461.319	495.933	513.998	570.235	2110.37	494.278	453.101	624.442	853.21	756.168	781.91	1274.39	1320.17	737.676	469.918	1140.03	998.604	780.404	668.383	750.132	681.777	754.519	1865.44	1240.58	1362.24	1108.24	956.515	810.437	1199.25	1167.99	596.301	636.02	656.607	466.013
COL17A1	256.284	16.649	289.553	329.513	271.606	374.485	240.209	387.825	257.746	272.726	272.886	4693.24	996.501	921.411	2025.59	310.833	14.6857	6.57227	16.0395	10.1553	19.3612	5.06991	22.3485	2.64597	4.04026	12.343	11.8526	27.1223	11.8054	11.8871	10.6636	12.4146	9.1635	3.7582	0.973997	1.17042	16.0694
GSTO2	472.194	1419.08	437.284	500.527	470.784	456.305	429.243	384.803	538.827	621.931	521.188	421.381	568.592	549.799	555.006	467.996	250.787	1284.88	239.358	393.8	394.67	425.872	394.499	1067.21	1068.65	51.0178	40.2989	35.8714	28.0379	35.6613	31.2293	47.1753	28.9003	865.639	1111.33	1074.45	536.316
SEC61A2	426.554	252.673	431.375	429.619	392.32	391.268	368.669	408.98	319.266	327.56	229.863	304.138	434.943	409.125	247.455	279.4	212.378	141.304	186.304	261.781	262.121	321.939	315.794	149.938	145.449	257.558	219.669	213.479	191.101	236.949	234.6	208.564	196.663	147.823	128.568	141.621	194.842
PRKCQ	117.61	1108.63	113.12	159.334	122.726	179.375	144.125	302.202	162.285	160.173	124.151	203.145	331.776	259.074	226.244	279.4	285.807	387.764	272.671	262.909	279.992	267.86	361.462	500.087	589.878	218.883	257.597	251.1	264.885	240.912	220.128	225.945	188.909	615.092	664.266	437.738	178.772
TLE2	392.324	2622.7	246.5	417.106	328.945	360.848	666.319	196.431	401.999	181.817	200.362	156.712	200.473	131.295	61.8637	74.5067	1093.52	2251	685.995	550.643	784.872	1072.29	1035.8	1006.35	1000.97	284.712	295.526	275.597	335.717	786.926	450.92	441.958	409.538	1024.74	1123.99	1234.8	822.553
ASB1	778.505	1002.86	645.796	764.972	729.313	803.516	769.713	975.104	617.318	795.091	576.502	624.527	813.614	743.225	744.132	800.948	622.449	1450.83	1042.56	983.936	761.788	655.708	589.806	1445.58	1461.56	817.108	825.733	831.166	742.267	522.24	862.232	829.292	936.086	1265.26	1396.71	1482.93	686.967
FAM107B	7306.71	8901.33	9950.32	7146.69	6764	5788.25	5635.51	5769.03	6894.44	8200.55	12573.7	6545.92	5801.98	5772.3	8454.12	6697.46	4066.82	8350.07	4600.86	4782.02	4727.11	3951.99	3777.87	9843.87	10008.7	4631.1	3747.01	4238.95	4103.87	4407.74	3744.46	3729.33	3667.51	9470.67	10475.3	10293.9	3627.67
ME1	265.938	108.708	422.933	236.082	238.41	244.411	323.76	1802.13	245.018	331.889	312.221	539.786	518.18	447.81	1012.8	1012.83	342.291	161.021	413.324	333.997	564.453	342.219	466.403	200.211	232.315	854.137	968.755	1014.9	798.343	513.523	863.756	1104.07	1306.15	166.614	196.747	222.38	106.46
TBC1D1	2235.46	6008.32	3149.63	2545.18	2477.65	2287.82	2300.78	3358.47	2293.2	2903.31	3795.82	2653.66	2760.89	2468.82	3457.3	2638	3064.8	10228.1	2674.89	2376.34	2860.24	3029.27	3127.82	10469.2	9704.71	2345.17	1996.77	1874.94	2001.76	1567.51	1658.96	1987.98	1989.89	8576.21	9934.77	10213.1	3257.07
CDK13	1985.32	1782.42	1932.32	1704.29	1588.39	1998.3	2259.01	2330.98	1571.93	1444.44	1629.94	1952.52	1864.04	1919.02	1824.1	1678.73	2371.18	1493.55	2634.17	2563.65	2465.57	2551.85	2583.68	1549.65	1677.72	2057.17	2272.54	2194.28	2225.33	2637.35	2055.8	2028.54	2084.34	1667.39	1723	1702.96	1827.89
MTHFD2	221.176	283.033	209.356	310.327	326.933	452.109	554.57	1327.67	309.719	274.169	297.47	689.533	774.926	631.858	1005.73	982.558	1005.41	875.756	1517.58	1184.78	848.169	1093.41	1229.17	645.616	614.12	1432.61	1366.21	1364.86	1249.16	850.324	892.7	1454.16	1769.26	618.85	459.727	562.973	461.995
SLC9A7	101.811	121.44	125.782	119.292	112.666	115.387	110.705	296.158	108.19	112.554	135.214	169.481	169.991	153.569	236.85	155.999	102.8	95.298	155.459	98.1679	89.3593	60.8389	81.6206	123.478	130.298	139.888	153.294	146.11	154.946	181.476	130.249	107.593	157.189	102.724	108.114	111.19	99.4294
FOXJ2	2143.3	710.03	2264.93	2228.18	2325.75	1674.17	1496.61	1591.6	2250.77	2463.19	2637.9	1504.44	1504.13	1447.76	1537.75	1358.58	988.463	1089.35	1231.34	1178.01	995.611	994.547	1109.65	1034.57	1016.13	1110.87	939.519	1038.52	1120.78	1168.11	1026	1040.34	984.019	1044.78	1136.65	1031.14	1599.91
YBX1	16092.3	17479.5	24842.5	14562.8	12762.5	13438.4	14598.4	30779.2	12695.3	17155.8	26568.3	30672.6	24679.2	25908.5	45655.4	37280.2	13297.4	16905.5	15700.2	11976.5	12848.4	11500.2	13128.3	19607.5	21379	31938.8	25934.3	27112.7	26323.2	30771.7	24246.1	27342.6	29916	22531.7	21970.5	21071.1	17394.1
PDE4A	1088.33	837.346	1089.83	1367.27	1405.31	1105.62	1067.36	1542.24	1715.12	1258.29	1594.29	920.539	927.332	927.272	1129.45	1125.75	1216.66	951.337	1251.08	1401.43	1020.93	1159.32	1059.12	420.708	448.469	1454.01	1325.91	1357.86	1434.36	1360.68	1448.73	1340.77	1436.55	575.005	533.75	589.893	2151.29
PPP2R5A	1955.48	3518.81	2179.67	1809.4	1711.12	1518.92	1536.29	1774.93	1910.29	1991.33	2829.66	1585.69	1207.52	1348.12	1560.73	1541.36	2105.71	3530.95	3153.6	2890.88	2031.43	1891.92	2055.09	3648.79	3820.07	2815.03	2715.83	2657.11	2736.65	3128.68	2847.19	3315.51	3479.31	3371.11	3616.45	4053.17	1993.61
CTNNA2	0	2.93805	8.44178	3.33685	3.01785	10.4898	28.1985	1.00734	1.06068	10.101	7.3753	3.48249	2.34471	7.03367	15.9078	5.82084	0	13.1445	2.46761	5.64183	0.744661	0	0	5.29193	5.05033	27.1546	67.9551	62.9937	50.1731	22.1892	48.7481	24.0015	25.3758	12.5273	8.76597	15.2155	0
ELAVL1	2504.03	2454.26	2592.47	2485.12	2578.25	2165.09	2136.82	2016.69	2501.09	2873	3639.71	2868.41	2630.76	2512.19	3181.56	3136.27	2520.3	2627.27	2363.97	2211.6	2182.6	2103.17	2206.67	2684.77	2663.54	3616.5	3312.42	3455.03	3453.83	3040.72	3177.77	2994.39	2993.64	2842.45	2955.11	2826.57	2729.79
TIE1	1159.42	1163.47	1124.44	1358.93	757.48	938.834	1379.64	377.752	1461.62	600.286	1441.87	682.568	651.829	590.828	351.739	452.861	5323.02	1830.38	3596.54	2406.81	3688.3	3607.24	3767.18	1170.4	1129.25	210.654	533.368	601.94	1076.51	568.203	588.024	307.881	199.482	1823.98	1774.62	1568.37	4778.64
DIP2B	1269.13	828.531	1600.56	1236.3	1219.21	1163.31	1197.91	1867.61	1053.26	1222.22	1456.62	1762.14	1824.18	1750.21	1698.6	1504.11	1235.86	650.655	1140.03	1298.75	1306.13	1122.14	1191.27	1302.7	1247.43	1432.61	1116.52	1140.01	1200.47	1183.95	1103.69	1027.1	1145.44	1223.92	1240.87	1076.79	1471.35
SMARCD1	2117.85	1909.74	2053.04	1980.42	2241.25	2289.92	2015.67	1784	2185.01	2510.81	2398.2	3289.79	3107.91	3115.92	2497.53	2898.78	2020.98	2412.02	1652.06	1650.8	1973.35	2127.67	2055.09	2114.13	2128.21	3374.58	3363.78	3168.06	3112.21	3241.21	3492.35	2815.62	2825.88	2267.45	2307.4	2188.69	2069.94
KDM4A	1133.09	680.649	1163.28	1148.71	1020.03	1032.19	1005.74	1237.01	1069.17	1079.36	1567.25	1493.99	1384.55	1226.2	1383.98	1469.18	603.245	1041.71	545.341	559.67	655.301	583.039	607.296	1516.14	1414.09	1519.84	1468.15	1525.85	1573.81	1614.27	1468.54	1511.26	1542.99	1380.51	1452.23	1418.55	1130.88
NFYC	2008.14	1862.73	2058.11	1932.03	2014.92	1741.3	1509.14	1640.96	1996.21	2067.81	2181.86	1774.91	1628.4	1628.3	1776.37	1553	1417.74	2066.98	1110.42	1150.93	1146.03	1356.2	1410.87	2393.72	2413.05	1819.36	1728.9	1705.2	1885.92	1958.2	1920.98	1890.32	1926.45	2653.29	2649.27	2427.46	2492.77
ZMYND12	245.751	257.569	265.916	178.521	179.059	178.326	153.525	121.888	172.891	200.576	227.405	241.453	233.298	242.662	243.92	277.072	84.7254	259.605	76.4959	89.141	72.2321	47.3191	68.0171	533.603	582.808	39.4976	27.6561	48.9951	53.8623	48.3409	31.9909	25.6567	47.9321	504.852	474.337	483.385	134.581
SLC9A3	150.084	1942.05	125.782	98.4369	104.619	118.534	125.326	73.5357	61.5196	40.4039	22.1259	41.7899	60.9624	43.3743	51.2585	41.91	314.049	279.322	120.913	406.212	1061.14	803.58	621.871	3654.96	3875.62	35.3833	50.5712	42.8707	47.2218	68.9452	60.1734	43.8648	38.0638	3143.11	3132.37	2419.26	2099.07
NGEF	882.072	213.499	997.818	875.088	1101.51	779.389	533.682	449.273	1120.08	998.553	908.391	832.315	681.138	965.958	682.268	671.725	486.889	193.882	831.584	604.804	528.709	659.933	534.42	614.746	619.17	236.986	297.106	769.048	621.999	348.688	353.424	153.113	152.96	682.74	612.644	620.324	215.933
ASPM	218.543	39.1741	139.289	130.971	112.666	329.379	416.71	379.767	123.039	111.111	177.007	345.927	262.607	316.515	413.603	474.981	254.176	11.5015	146.823	147.816	314.992	325.319	312.879	8.81988	13.1308	2093.38	1807.92	1579.22	1229.98	758.397	1302.49	2102.2	2152.01	7.5164	5.84398	9.36338	164.711
CD84	895.237	53.8643	1334.65	1091.15	1298.68	1618.57	1675.2	8894.8	1482.84	1424.24	996.895	3359.44	3554.58	2663.42	4493.07	3452.92	956.832	55.8643	1331.27	829.349	1321.03	692.887	1436.13	133.18	169.691	3021.57	2422.68	2001.8	2211.31	1787.03	1377.9	3081.29	3031.71	45.0984	30.1939	15.2155	359.553
ELOVL1	2267.06	1923.45	2298.7	2602.74	2888.08	2263.69	1785.9	2390.42	2986.88	4049.05	3548.75	4053.62	4147.79	4172.14	4127.19	4771.92	2145.25	1713.72	1386.8	1257	1779.74	2066.83	1920.03	2159.99	2128.21	3586.88	3387.48	3597.64	3546.06	3652.51	3425.32	3104.47	3118.41	2207.32	2140.85	2002.59	2144.26
SPI1	1848.4	303.599	1740.69	2575.21	2634.58	2892.03	2927.42	9610.01	3667.84	2865.79	2299.86	6246.43	6658.97	6864.86	7552.67	6189.88	1272.01	246.46	1887.72	1159.96	1239.86	1008.91	1428.36	523.901	613.11	5806.15	4843.78	3662.38	4199.05	3374.35	3400.94	4955.06	5350.78	236.767	242.525	257.493	1532.62
ZNRD1	271.204	446.584	220.33	263.611	322.91	249.656	248.564	248.813	366.996	311.687	342.951	290.208	280.193	250.868	360.577	339.937	475.592	491.278	558.913	608.19	417.01	442.772	453.771	477.156	432.308	508.532	489.909	531.072	494.353	499.258	487.481	518.928	435.619	390.853	400.313	366.342	557.407
MPPED2	44.7618	1013.63	48.1181	22.5237	27.1606	78.6732	118.016	17.1248	31.8205	20.2019	17.209	15.0908	38.6877	41.0298	12.3727	38.4175	122.005	1339.1	40.7155	54.1616	113.188	210.401	161.298	635.032	643.412	5.76007	42.6695	30.6219	50.911	47.5484	57.8884	40.5542	12.6879	746.629	825.95	915.27	165.716
CLDN18	69.337	38.1947	96.2363	59.229	45.2677	58.7427	75.1959	96.7045	43.488	41.8469	23.3551	33.6641	35.1706	52.7525	38.8858	34.925	46.3166	18.0738	33.3127	53.0332	54.3602	43.0942	43.7253	9.70187	13.1308	9.05154	6.3214	12.2488	8.85408	22.9817	23.6124	13.2422	16.9172	8.76914	15.584	1.17042	31.1345
ZBTB11	806.591	624.826	818.008	659.027	638.778	705.961	842.82	1091.96	501.703	476.189	721.55	741.771	722.17	818.251	952.701	888.26	672.155	632.581	605.798	591.264	648.6	600.784	679.2	814.075	791.891	847.554	740.394	720.053	720.132	648.243	614.683	697.698	866.303	719.069	716.862	891.862	691.989
ATXN3	544.164	769.77	504.818	498.024	452.677	543.37	617.233	791.768	420.031	340.547	346.639	393.522	424.392	416.159	441.884	400.474	552.41	609.578	446.637	365.591	516.795	599.094	601.466	541.541	539.375	378.519	320.811	281.722	318.009	289.253	257.451	338.503	342.574	543.686	495.765	632.028	762.292
GOLGA5	964.574	1223.21	1238.41	1050.27	954.646	997.576	1120.63	1304.5	932.341	1118.32	1908.97	1288.52	1139.53	1073.81	1500.64	1553	1249.42	1255.3	1396.67	1075.33	1264.43	1116.22	1119.37	1748.98	1878.72	1613.64	1519.51	1552.97	1424.77	1401.88	1303.25	1411.95	1378.05	1806.44	1810.66	1802.45	1962.48
FGFR2	4838.67	1911.69	5407.8	3024.85	3216.02	2025.57	1464.23	1551.3	3737.85	3098.11	4245.71	2405.24	2357.6	2301.18	2140.48	1527.39	1065.28	1833.66	2171.5	1922.74	787.106	867.799	1036.78	4390.54	4938.21	286.358	1099.92	2491.75	2445.2	3901.34	2892.13	492.444	495.534	2771.05	2713.56	2148.9	1369.92
LRRC40	810.102	622.868	855.996	833.377	805.765	669.247	655.875	607.425	653.381	689.752	1022.71	538.625	504.112	590.828	608.032	728.769	616.801	517.567	552.744	508.893	638.919	620.219	667.54	889.926	936.331	688.74	647.154	688.556	616.834	580.09	543.846	637.28	753.521	831.815	728.55	829.83	1106.78
ISOC1	713.557	1498.41	954.765	638.172	567.355	569.594	412.533	469.42	500.642	714.283	1113.67	546.751	417.358	391.541	570.914	621.666	630.357	1376.89	607.032	625.115	675.407	625.289	536.364	2480.15	2547.38	988.264	949.791	1234.5	1292.7	1369.39	1203.47	1028.75	1015.03	2524.26	2510.96	2319.78	1237.34
EML1	378.282	731.576	436.44	485.511	362.142	416.444	574.413	347.532	378.664	281.384	537.168	472.458	512.319	505.252	385.322	497.1	977.166	1012.13	756.322	563.055	886.891	999.617	1073.7	965.777	939.361	518.407	546.801	553.819	569.613	611.789	485.196	679.49	717.572	965.858	1055.81	1075.62	1470.35
TRMT11	615.256	484.779	609.496	547.243	475.814	434.276	528.46	438.192	382.907	422.798	583.878	286.725	298.95	327.066	351.739	364.385	427.016	391.05	572.485	661.223	498.178	523.045	541.222	529.193	640.381	808.056	951.371	979.027	821.954	683.112	826.433	845.017	935.382	569.994	545.438	560.632	338.462
THUMPD1	2963.06	2970.37	2817.02	2890.54	2823.7	2485.02	2501.31	1924.02	2832.02	3177.48	3349.61	2320.5	1817.15	2001.08	2113.97	1939.5	2859.2	3272.99	2507.09	2702.44	2251.11	2436.94	2360.19	2980.24	3022.12	2647.17	2659.73	2795.34	2502.02	3212.69	2591.27	2025.23	2103.37	3178.19	3349.58	3125.03	2888.48
MSANTD3	294.902	480.862	403.517	334.519	263.559	324.134	382.246	322.348	274.717	402.596	518.729	294.851	268.469	228.594	422.441	575.099	432.664	381.192	610.733	524.69	498.178	414.042	455.715	376.609	415.137	1140.49	711.158	559.944	546.74	377.217	475.294	964.197	960.757	448.479	384.729	374.535	627.711
KIF26A	122.876	893.169	105.522	92.5974	58.3451	106.996	181.723	50.3669	130.464	31.7459	106.942	77.7756	72.6859	58.6139	28.2805	39.5817	576.133	742.667	362.738	382.516	580.835	473.191	278.87	540.659	794.921	220.529	161.986	329.842	275.952	82.4172	182.805	228.428	203.007	1133.72	1049.97	735.025	338.462
ATG2B	1739.57	1422.02	1641.93	1162.89	1160.87	1245.13	1337.86	1562.38	911.127	841.267	1122.27	1061	1051.6	994.092	935.026	728.769	1090.13	1063.07	834.052	1062.92	1040.29	1261.56	1180.58	1692.54	1680.75	762.798	659.006	779.547	788.013	871.72	663.431	654.661	670.345	1429.37	1613.91	1583.58	1453.28
ARFGEF1	2758.56	2162.41	3417.23	2698.67	2555.11	2516.49	2412.53	3443.08	2437.45	2588.73	3623.73	3916.64	4099.72	3661.03	4991.52	4835.95	1432.42	2513.89	1997.53	1729.79	1658.36	1371.41	1723.75	3452.98	3379.68	2133.7	1789.75	1839.07	1835.01	1947.9	1470.06	1702.45	1812.26	3357.33	3647.62	3539.36	1925.32
ACSM2B	33675.8	12264.4	32023.9	29954	42124.1	16988.2	5916.45	10240.6	28706.3	41388	24649.5	15570.2	13446.9	17524.4	9944.15	8469.32	7367.72	18673.5	640.344	2035.57	4299.67	7737.52	4669.86	33243	28906	18.1031	14.2232	182.857	188.149	326.499	178.997	17.3804	8.45861	33550.7	31949.1	33920	17615.1
ZFAT	961.063	436.791	1251.07	756.63	677.004	608.406	455.353	421.068	468.822	985.566	998.124	876.427	868.714	720.951	675.198	679.874	399.904	509.351	307.217	259.524	334.353	395.453	362.434	1200.39	1202.99	283.066	247.325	276.472	314.32	300.347	286.395	280.569	335.525	1337.92	1355.8	1358.86	907.921
MTFR1	1937.92	989.145	2774.81	2068.84	1769.46	1766.48	1973.89	2357.17	1458.44	1923.51	3408.62	3945.66	4049.31	3784.12	5687.93	5458.78	983.944	1044.99	885.871	893.666	936.039	903.289	941.551	2422.82	2413.05	1226.07	969.545	1023.65	892.049	969.195	772.353	848.328	866.303	2325.07	2292.79	2304.56	1522.58
STAG3	433.576	125.357	436.44	281.129	353.088	287.419	202.611	341.488	268.353	207.791	110.629	156.712	254.401	178.186	182.056	97.7901	203.341	103.513	90.0677	181.667	202.548	300.815	205.023	84.6709	74.7448	87.224	69.5354	45.4954	78.2111	141.853	70.0754	86.0742	100.798	53.8675	49.6739	43.3056	171.742
FECH	355.462	2494.41	457.544	348.7	344.035	384.974	390.601	871.348	356.39	408.368	424.08	504.961	517.008	395.058	641.615	636.8	815.623	1825.45	864.897	801.14	817.638	665.003	725.84	4559.88	5347.29	1082.07	892.898	937.031	987.968	1086.48	811.961	821.843	891.679	5304.07	5777.75	4716.8	1187.13
MYO9A	5025.61	3692.16	4670.84	3749.78	3741.13	2626.64	2308.1	2588.86	3509.8	3991.33	3918.74	4527.24	3145.43	4243.65	3165.65	2640.33	4629.4	2285.51	4122.14	5435.34	3989.89	3618.22	4022.73	2763.27	2979.69	1296.84	1472.89	1914.31	2003.97	3232.5	2007.05	1553.47	1418.23	2872.52	3005.75	2720.06	6118.43
DDX3Y	790.793	1928.34	682.94	664.866	557.296	949.323	1262.66	3347.39	481.55	411.254	585.107	804.456	826.51	765.498	1235.51	934.827	1077.71	2242.79	746.451	621.73	1165.39	1122.14	1371.03	2392.83	2571.63	3019.92	2485.89	2695.6	2568.42	3039.13	2308.68	2453.94	2745.52	2343.86	2392.14	2485.98	2813.15
PFKP	26815.9	7880.84	30458.8	22892.4	21307	16509.8	13860.1	12008.5	19484.8	20930.7	29631.5	18698.7	16354.3	16942.9	25388.9	25043.6	11781.4	3622.97	19405.3	20597.2	20093.2	14520.2	13526.7	3093.13	3027.17	13703.2	10843.6	12191.9	9488.62	6334.24	8744.95	13824	12045.1	2619.47	3030.1	2618.24	27409.4
IDI1	619.644	1925.41	764.825	689.893	621.677	650.365	566.058	871.348	647.017	725.827	915.766	644.261	568.592	558.005	841.346	882.439	895.83	2577.97	1031.46	786.472	953.91	916.808	934.75	2904.39	3012.01	1056.56	839.166	792.67	861.059	812.285	718.273	838.396	846.566	2336.35	2450.58	2478.96	1030.45
SP100	3939.92	2518.89	3794.58	3456.14	3535.91	3747.99	3951.96	4795.94	4140.91	3470.4	3754.03	3942.18	3642.5	3568.42	3828.48	3245.7	3182.29	2676.56	3480.56	3033.05	2649.5	2775.77	2915.99	2066.5	2228.2	3580.3	3619.79	3520.65	3883.25	2505.8	3531.95	3579.53	3456.05	2051.98	2154.48	2110.27	3419.77
KLF6	41375.7	22266.5	24930.3	21549.3	21615.8	19760.6	28954.6	20157.9	19334.1	18288.5	12933.8	25815.7	20751.8	28393.8	40702.8	39035.7	22620.6	10497.6	42436.7	39347.3	32487.3	21427.1	25935.9	9575.75	10127.9	6522.05	6198.14	7873.33	6736.48	9492.24	8904.91	7317.96	6989.63	8444.68	7394.59	7016.68	35102.6
PPAP2A	1037.42	1376.97	1533.87	1264.66	589.486	1232.55	2041.78	429.126	932.341	633.475	1532.83	936.79	818.303	999.954	767.11	1298.05	6869.54	5190.45	3036.39	2371.83	6421.95	6699.88	6841.55	3383.31	3245.34	327.501	497.811	581.817	910.495	800.398	639.819	399.749	363.015	3282.16	3343.73	3835.47	6817.44
NEO1	1083.94	1819.64	1433.41	1247.98	1179.98	1373.11	1574.94	616.491	1323.73	1344.87	1988.87	1538.1	1246.21	1409.08	1410.49	1750.91	2331.64	2461.32	1828.5	2167.59	2126.75	2107.39	1818	3030.51	2928.18	2546.78	2662.89	3115.56	3407.35	5117	3559.37	2668.3	2962.63	2905.09	2868.42	2826.57	4289.53
TRAM1	7759.6	2500.28	13847	9203.02	7119.1	6562.4	5752.48	10932.6	6668.52	6838.36	20804.5	21048.2	20261.8	18519.7	28563.4	30667.7	3988.87	3233.56	5549.65	5287.53	5323.58	3221.08	3367.82	4823.59	5111.94	8709.23	7501.14	9092.09	8364.89	9905.91	7412	7340.31	7842.54	4651.4	4685.9	4603.27	4460.26
PHKA1	717.067	345.711	650.861	362.048	471.79	250.705	234.987	231.688	285.324	473.303	550.689	553.716	447.839	624.825	528.493	414.444	428.146	412.41	541.64	646.554	516.795	404.748	397.414	427.764	407.056	929.018	733.283	782.171	680.289	754.434	710.656	801.98	732.375	423.424	451.935	413.159	165.716
TNFRSF1A	16540.8	3327.84	14297.8	16611.6	18180.5	17379.4	14071	10864.1	20242.1	21900.3	25074.8	16595.2	15493.8	16599.5	17169.8	20773.4	7759.72	2766.93	10894.5	9678	7237.36	5971.51	5927.21	5464.8	5346.28	9554.32	9064.89	8133.18	8409.9	7176.64	7593.28	9832.33	8921.02	3901.01	3566.78	3425.83	6801.38
CACNB1	136.919	202.726	92.8596	158.5	140.833	202.452	250.653	277.018	160.163	85.1368	54.0855	146.265	161.785	134.812	134.333	138.536	211.249	141.304	215.916	248.241	212.973	278	235.145	68.7951	80.8052	311.867	296.316	223.977	259.72	244.082	287.919	283.052	256.578	86.4386	50.6478	90.1225	154.668
EVI5	399.346	752.142	436.44	423.779	384.273	468.892	617.233	755.504	388.21	405.482	395.808	529.339	577.971	534.559	486.072	478.473	657.469	903.688	472.547	398.313	536.156	538.255	643.248	736.46	729.267	825.336	744.345	650.06	627.902	771.076	648.198	762.254	735.194	709.047	719.784	805.251	507.191
STOML1	1544.72	530.809	1480.69	1776.04	2014.92	1497.94	1177.02	965.031	2517	2650.78	2623.15	3188.8	2383.4	2541.5	2755.59	3082.72	1128.54	460.059	1423.81	1277.31	963.591	943.003	812.319	463.926	495.942	1234.3	1699.67	1796.19	1729.5	1348.79	1624.68	1382.98	1304.74	462.259	395.443	456.465	665.876
PKM	83636.2	48345.7	92536.2	84658.3	88054.8	71341.9	60728	55623.2	97777	115606	121689	104053	82529	83055.9	132678	165176	46037.5	32424.3	66331.8	63776.4	56314.2	41767.6	42869.3	30755.8	33179.6	95227.2	109386	113191	103352	76239.9	100784	103020	96815.9	34000.4	34724.9	30076.4	82440.1
DHX29	1533.31	2234.88	1428.35	826.703	809.789	782.536	903.395	1072.82	842.182	1082.25	865.368	885.714	1023.47	968.302	935.026	975.573	2818.53	2150.78	2662.55	2819.79	2441	2520.59	2193.07	2414.88	2395.87	1281.21	1421.53	1687.71	1654.24	1614.27	1552.32	1406.98	1384.39	2445.34	2531.42	2545.67	1702.35
DNTTIP2	1459.59	1931.28	1446.08	1379.79	1345.96	1271.36	1393.21	1462.66	1539.05	1652.23	2115.48	1849.2	1501.79	1614.23	2310.17	2344.63	1702.42	2338.09	2097.47	1734.3	1468.47	1526.89	1372.97	1927.14	2051.44	2619.19	2501.7	2367.51	2248.94	2157.11	2211.95	2443.18	2670.81	2063.25	2133.05	2050.58	2465.65
METTL22	1183.99	316.331	1165.81	1099.49	1299.69	1299.68	1079.9	905.598	1122.2	1062.04	787.928	557.199	758.513	725.641	599.194	630.979	410.071	243.174	382.479	479.556	478.817	543.325	452.8	297.23	275.748	337.376	387.976	421.708	375.561	359.783	394.555	375.747	394.735	220.481	206.487	252.811	345.492
TP53BP1	1627.22	1950.87	1758.42	1363.94	1276.55	1591.3	1962.4	1757.81	1292.97	995.667	1429.58	1639.09	1480.68	1678.7	1838.24	1706.67	1414.35	1394.97	1752	1797.49	1618.15	1688.28	1576.05	1564.65	1412.07	1596.36	1888.52	1965.05	2058.57	1762.46	1842.53	2036.81	2200.65	1330.4	1447.36	1385.78	1342.8
TRO	594.192	964.661	444.882	585.616	627.712	714.353	963.969	369.693	561.101	385.28	231.093	407.451	429.082	473.601	261.595	314.325	421.368	644.083	445.403	368.976	438.605	626.134	529.562	348.385	327.261	680.512	700.095	663.183	607.242	668.055	859.185	847.5	929.038	256.81	329.211	335.911	166.72
RRP15	827.655	1107.65	840.801	936.819	932.515	776.242	753.003	525.831	1026.74	1101.01	1318.95	690.694	463.08	501.735	666.36	875.454	1128.54	1261.88	1444.78	1304.39	1084.23	916.808	937.665	841.417	887.847	1356.91	1375.7	1171.51	1130.37	822.587	1243.84	1269.59	1232.14	1038.52	1104.51	1076.79	934.034
RHOA	5770.77	12982.3	6842.91	7252.63	6484.35	7258.92	8181.73	16878	7243.41	7161.59	10476.6	13974.1	11920.5	10666.6	20178.2	19631.4	13532.3	17329.4	14819.2	10819.9	11534.8	10671.3	12221.7	16178.3	16477.2	14297.3	11936.4	10549.7	11108.9	10454.3	8743.43	10658.3	10870	17320.3	17044.9	16869.3	14228.5
DHX8	1039.18	987.186	1100.81	1027.75	1032.1	1004.92	959.792	1359.91	1169.93	1036.07	1481.21	1366.3	1266.14	1159.38	1346.86	1296.88	1028	1368.68	1128.93	1001.99	985.186	975.957	1043.58	1507.32	1431.26	1773.28	1486.32	1409.48	1575.29	1437.55	1284.97	1517.89	1547.22	1465.7	1429.83	1410.36	1178.09
PMS2P4	233.464	177.263	254.098	206.884	211.249	191.963	169.191	161.174	226.986	189.032	211.425	154.39	157.095	137.157	143.17	139.7	289.196	284.251	194.941	251.626	268.823	314.334	318.709	282.236	297.969	152.231	209.396	295.72	227.993	271.818	220.128	148.975	162.828	204.196	180.189	166.2	134.581
PRKCZ	700.391	611.115	634.822	675.711	690.081	491.97	319.582	331.414	622.621	831.166	1050.98	556.038	456.046	464.222	461.326	423.757	176.229	732.809	88.8339	113.965	171.272	134.353	109.799	1244.49	1088.85	524.167	461.462	454.079	499.518	612.582	514.14	592.588	627.347	1181.33	1128.86	1141.16	570.464
ZFY	82.5022	333.959	69.2226	119.292	85.5057	159.444	183.812	319.326	81.6726	57.7198	61.4608	106.796	151.234	94.9546	167.916	107.103	250.787	353.26	112.276	106.066	221.909	216.316	231.258	548.597	479.781	661.586	552.333	577.442	533.458	447.747	466.915	571.897	532.893	429.688	435.377	484.555	632.733
IARS2	1893.16	2715.74	2655.78	2505.14	2163.8	2172.43	2570.24	1995.54	2011.06	2402.59	4165.81	1766.78	1691.71	1596.64	2499.29	2631.02	3167.6	3503.02	4247.99	3782.28	3531.18	2702.26	2900.44	5854.64	6093.72	5806.15	4647.81	5100.74	4849.09	4723.14	4428.46	5186.8	5688.42	5383	5576.13	5271.58	3717.05
SYT1	11.4099	64.6372	20.2603	13.3474	10.0595	24.1265	24.0209	73.5357	20.153	15.873	6.14608	38.3074	36.343	44.5466	31.8156	33.7609	27.1121	49.2921	17.2733	32.7226	24.5738	42.2492	37.8953	82.9069	95.9562	78.9953	61.6337	74.3675	106.987	457.257	87.5943	62.9004	32.4247	137.801	186.033	175.563	17.0737
NAV3	8.77683	21.5457	2.53253	0.834211	2.0119	112.24	82.5066	40.2936	5.30342	2.88599	1.22922	6.96498	31.6536	7.03367	8.83767	37.2534	59.8726	29.5752	111.042	44.0063	29.7864	29.5745	56.3571	23.8137	38.3825	969.338	1000.36	678.057	558.545	324.121	420.452	810.256	796.519	25.0547	22.4019	26.9197	26.1128
IDH3G	1632.49	2759.81	1571.86	1490.74	1453.6	1411.92	1378.59	1484.82	1680.12	1694.08	1902.83	1478.9	1573.3	1515.76	1744.56	1824.25	1878.64	2614.12	1745.83	1800.87	1780.48	1792.21	1722.78	3369.2	3402.91	2030.01	2269.38	2187.28	2274.76	2301.34	2425.98	2088.13	1957.46	4310.66	4058.65	3697.37	2459.62
ROGDI	2704.14	2262.3	2604.29	2736.21	3102.35	3061.96	2404.18	1412.29	3367.67	3313.12	2480.56	1177.08	1131.32	1157.04	1267.32	840.529	698.137	1836.95	516.964	543.873	753.597	970.042	745.273	3156.64	3099.89	884.583	906.331	895.035	863.273	1248.15	954.397	971.646	967.101	2368.92	2449.6	2470.76	1467.34
PDZD4	36.8627	296.744	42.2089	85.0895	47.2796	91.2609	239.165	105.771	38.1846	64.9348	12.2922	29.0208	69.1689	26.9624	31.8156	22.1192	192.044	484.705	48.1184	76.7289	210.739	321.094	388.669	172.87	172.721	23.8632	67.9551	41.1209	72.3083	96.6817	83.0241	33.1055	21.1465	301.909	228.889	265.686	236.019
ATP2B3	30.7189	168.448	40.5205	283.632	178.053	65.0365	22.9765	43.3156	75.3085	116.883	325.742	13.93	60.9624	83.2318	56.5611	53.5517	4.51869	1.64307	6.16902	2.25673	5.95729	0.844985	3.88669	108.485	172.721	0.822868	0	4.37456	2.21352	0.792473	5.33182	3.31055	4.22931	106.482	83.7637	38.6239	3.01301
ROCK1	2736.62	4941.81	2298.7	2749.56	3034.95	2997.97	3373.37	3955.82	3388.88	3217.88	2784.18	3960.75	3643.68	3540.28	3130.3	3321.37	5551.21	5721.16	4611.96	4363.39	4205.1	4997.24	4812.7	3621.44	3731.18	3394.33	3514.7	3312.42	3580	3415.56	3272.98	3344.48	2880.16	3684.29	3589.18	3730.14	5458.58
CBFB	2049.39	1407.33	2062.33	2002.11	2055.15	1915.43	1920.63	2493.16	1916.65	2111.1	2403.12	2262.46	1791.36	2090.17	2327.84	2682.24	1816.51	1164.94	2560.14	2198.06	1903.35	1667.15	1736.38	921.678	933.3	2048.94	2016.53	1894.18	1983.31	1986.73	1838.72	2013.64	1869.35	818.035	770.432	808.762	1626.02
PDK3	388.814	176.283	412.803	360.379	248.469	389.17	472.063	448.266	294.87	265.511	503.979	257.704	249.711	222.733	385.322	302.684	244.009	162.664	394.817	299.017	291.162	260.255	229.315	400.423	342.412	255.912	207.816	278.222	264.147	206.835	224.698	211.875	238.956	266.832	292.199	250.47	240.037
HYAL2	1069.9	2766.67	1125.29	1753.51	1338.92	1379.4	1499.74	648.726	2115	1370.85	1995.02	1369.78	1416.2	1133.59	783.018	1251.48	4368.44	2942.74	2735.34	1742.2	3705.43	4341.53	5186.79	2033.87	2370.62	999.784	1232.67	1210	1726.55	1229.13	1368.76	926.953	838.812	3243.33	2485.64	2497.68	5078.94
HDAC4	607.357	799.151	535.209	579.777	603.57	661.904	633.943	764.57	525.038	487.733	470.79	497.996	679.965	630.686	562.076	547.159	469.944	619.437	851.325	673.635	395.415	544.17	424.621	560.063	568.667	724.946	821.782	763.798	732.675	398.614	799.012	828.464	680.918	571.247	584.398	612.131	387.674
RASSF1	1333.2	1105.69	941.258	1303.87	1385.19	1441.29	1657.44	2395.45	1279.18	1207.79	870.285	1293.17	1692.88	1562.65	1521.85	1509.93	1211.01	854.396	1127.7	936.544	1245.07	1253.11	1514.84	724.113	803.002	868.948	954.532	797.92	913.446	829.719	802.059	819.36	780.307	751.64	727.576	725.662	1084.68
FGFR3	2616.37	5590.14	2960.53	2604.41	3075.19	2202.85	1413.06	983.163	2442.75	3148.62	2855.47	1822.5	2146.58	1909.64	1299.14	1670.58	954.573	2436.67	176.434	434.421	1079.76	1418.73	962.928	2425.47	2788.79	74.881	89.2898	138.236	133.549	170.382	329.811	94.3506	82.4715	3031.62	2685.31	2172.3	1902.22
IFI35	1903.7	900.024	1842.84	2107.22	2186.93	1967.88	1822.46	1839.4	3064.31	2756.12	2782.95	2463.28	2334.16	2083.14	2564.69	2143.23	1318.33	1012.13	1304.13	1200.58	1379.11	1136.5	1181.55	1441.17	1427.22	1875.32	2168.24	1958.05	2055.62	1677.67	1831.86	1892.81	1748.82	1102.41	1085.03	1040.51	1812.83
HEATR6	767.973	359.422	683.784	614.814	627.712	755.263	775.98	786.732	521.856	578.641	710.487	722.037	668.242	758.464	708.781	693.844	336.642	317.112	404.688	417.496	399.883	375.173	428.508	385.429	383.825	601.516	605.274	601.065	624.951	637.941	575.075	639.763	691.492	358.282	366.223	355.808	502.169
COASY	3511.61	3828.29	3375.02	3702.23	4679.68	3647.29	2425.07	2593.9	4593.82	5298.68	4074.85	3889.94	4272.06	4214.34	3770.15	3867.37	2609.54	3072.54	2810.61	2789.32	2467.06	2710.71	2383.51	4560.76	4773.57	3398.44	3454.65	3329.04	3317.33	3070.83	3422.27	3470.28	3338.33	4745.35	4413.18	4233.42	3049.17
PLEKHH3	2146.81	943.116	1783.75	2211.49	2604.4	2567.89	2675.72	964.023	2146.82	1842.71	1647.15	1064.48	1232.14	1264.89	935.026	1048.92	1901.24	979.269	996.914	1332.6	1722.4	2533.26	1964.72	729.404	749.468	859.074	1024.86	843.415	946.649	1549.28	1195.85	824.326	850.091	761.662	811.34	786.524	2220.59
MEF2A	2662.01	1859.79	3136.96	2520.15	2336.82	2455.65	2949.35	4852.35	1731.04	1871.57	2959.95	2885.82	2728.07	3597.72	3344.17	2909.26	2446.87	2180.35	2915.48	2694.54	2697.91	2555.23	2850.89	2586.87	2478.7	1234.3	1415.2	1951.93	1933.88	2608.82	1630.01	1222.42	1390.74	2658.3	2831.41	2732.94	3315.32
OTUD5	2990.27	3021.3	3018.78	3522.04	4025.81	3495.19	3257.44	3171.1	3748.45	4164.49	4308.4	2920.65	3485.41	3046.75	3160.35	3286.45	2379.09	2890.16	2703.26	2718.24	2446.96	2570.44	2399.06	3058.74	3087.77	3072.59	2784.58	2694.73	2973.5	3632.7	3237.94	2906.66	2859.01	3571.54	3440.16	3286.55	3198.82
TFE3	2687.47	2506.16	2797.61	2929.75	2903.17	2419.99	2558.75	3166.07	2749.29	3369.4	4291.19	2501.59	2545.18	2650.52	3517.39	3696.23	2292.1	2688.06	2863.66	2614.43	2245.15	1998.39	2004.56	2355.79	2466.58	3171.33	2711.88	2754.22	2837.73	2511.35	2673.53	2950.53	2851.26	2356.39	2491.48	2292.86	2809.13
TBC1D25	617.011	539.623	594.301	714.919	720.26	505.607	528.46	633.616	668.23	721.498	822.346	636.135	651.829	695.161	666.36	627.487	633.746	575.074	927.821	792.113	597.218	531.495	564.542	644.734	692.905	801.473	702.466	793.545	842.613	904.212	813.484	764.736	748.587	766.673	764.588	696.401	974.208
ACSL4	1876.49	5364.89	2576.43	2066.34	1697.04	1928.02	2194.26	3511.58	1942.11	2051.94	3221.78	3164.42	2466.63	2405.52	3982.25	4152.59	2570	6202.58	3847	3042.08	2382.91	2181.75	2166.83	8397.41	7269.44	3211.65	2154.02	2378.89	2409.79	2188.81	1790.73	2753.55	2919.63	4935.77	6640.71	7162.99	1538.65
INPP5A	455.518	656.166	484.558	503.864	396.344	392.317	490.862	377.752	405.181	490.619	775.636	359.857	362.257	444.294	360.577	386.504	918.424	1133.72	660.085	502.123	819.871	943.848	819.121	1367.08	1291.87	766.09	653.475	731.426	707.589	936.703	827.956	833.43	739.424	1317.88	1162.95	1265.23	1017.39
GPKOW	583.659	751.163	738.656	693.23	574.397	569.594	587.99	630.594	650.199	639.247	974.769	632.653	647.139	664.682	1081.73	1031.45	831.439	785.387	943.86	910.592	774.447	743.586	716.123	934.908	910.069	950.412	861.291	860.039	856.632	760.774	815.007	923.643	895.203	1015.97	1041.2	952.724	992.286
GRIPAP1	3377.33	2620.74	3069.43	3381.89	3636.51	3215.11	3135.25	4152.25	3208.57	2952.37	2540.79	2386.67	2861.72	2843.95	2631.86	2562.33	2070.69	2380.81	2049.35	2447.43	2381.43	2350.75	2269.83	2121.18	1964.58	2136.99	2175.35	2033.3	2003.97	1936.01	2089.31	2117.92	2127.34	2119.63	2141.82	2109.1	2716.73
FTSJ1	779.383	716.885	798.592	713.251	811.801	830.789	962.925	808.893	834.758	669.55	967.393	755.701	804.235	674.06	988.052	1133.9	870.977	639.154	1570.63	1058.41	905.507	770.626	895.883	710.883	758.559	1440.02	1249.27	1143.51	1114.88	926.401	1072.46	1201.73	1166.58	771.684	794.782	781.842	703.036
PRR11	211.522	78.3481	149.419	219.398	243.44	346.162	375.979	420.06	312.902	301.586	314.679	764.987	611.969	656.476	804.228	746.232	356.976	57.5074	325.724	302.402	399.883	258.565	290.53	37.0435	49.4932	1308.36	1347.25	1174.13	945.173	527.787	982.579	1065.17	990.363	25.0547	31.1679	42.1352	117.508
REEP1	622.277	165.51	884.698	940.156	999.913	579.035	246.475	173.262	600.347	821.065	1379.18	30.1816	35.1706	28.1347	148.473	118.745	84.7254	139.661	49.3522	34.9794	94.5719	187.587	111.742	223.143	218.174	18.926	18.174	40.246	42.7947	19.8118	31.2293	9.10401	7.75373	222.987	185.059	189.608	88.3817
ATP11A	5543.45	1794.17	6874.14	6353.35	6133.27	4075.27	2279.9	3919.56	5000.06	4992.77	8009.57	3048.34	3014.12	3070.2	3190.4	2787.02	10836.9	882.328	6044.41	10675.5	13237.1	11478.3	9136.64	3115.18	3017.07	1598.83	1548.74	2816.34	2886.43	3339.48	2078.65	2141.92	1992.71	2657.05	2587.91	2402.88	7904.14
POLR1A	960.186	1361.3	1099.12	1108.67	1092.46	1165.41	973.369	1145.34	1062.8	1219.33	1363.2	1192.17	1220.42	1192.21	1150.66	1238.67	1134.19	1007.2	1291.79	1096.77	1143.05	1088.34	1072.73	1502.03	1323.19	1681.12	1765.25	1731.45	1751.63	1511.25	1741.22	1611.41	1700.89	1362.97	1476.58	1187.98	1005.34
LAPTM4A	15908	11358.5	20372.5	18990	16457.3	17161.3	18659	12953.4	17520.4	20448.7	34141.5	20637.2	18896	17014.5	24863.9	29188	13138.1	13307.2	15888.9	14241.1	11961.5	11011.8	11089.7	15969.3	17551.9	5903.25	5185.92	6695.7	7421.93	10608	5115.5	4717.53	4573.99	15691.7	14630.4	14884.3	17127
TTC7A	2841.94	1867.62	2649.87	2698.67	2890.09	2351.8	1943.6	2595.91	3119.47	3313.12	2773.11	1944.39	1759.7	1813.52	1901.87	1746.25	1988.22	1740.01	2434.3	2457.58	2138.67	2234.14	2058	1758.68	2051.44	1625.99	1543.21	1523.22	1469.78	1783.06	1773.21	1661.07	1676.22	2051.98	1860.33	1790.75	3732.12
IP6K2	2042.37	2777.44	1641.08	1989.59	2104.45	2135.72	2428.2	1767.88	1713	1559.88	1210.78	1589.18	1786.67	1649.4	1456.45	1747.42	2017.59	3190.84	1861.81	2015.26	2250.36	2452.99	2603.11	2557.77	2352.44	1145.43	1239.79	1060.39	1237.36	1463.7	1291.82	1168.62	1196.19	2332.59	2363.89	2585.46	2056.88
STON1-GTF2A1L	1.75537	5.87611	1.68836	3.33685	1.00595	4.1959	8.3551	1.00734	0	0	2.45843	0	0	0	0	0	2.25934	0	0	0	0	0	0	2.64597	2.02013	0	0	0	0	0	0	1.65527	0	5.01093	1.94799	0	7.03036
SRBD1	445.863	463.233	555.469	493.853	423.505	496.166	498.173	737.372	414.727	422.798	669.923	689.533	604.935	558.005	749.435	733.426	691.359	619.437	650.215	583.366	589.771	533.185	553.854	668.547	757.549	639.368	504.132	503.074	503.207	459.634	440.256	489.133	525.139	675.223	691.538	732.685	646.793
CYFIP1	3332.56	3221.09	4085.82	3597.12	3018.85	3617.92	4014.62	8462.65	3211.75	3330.43	4904.57	5668.34	5050.5	5184.99	7308.75	6895.37	4563.88	3238.49	5561.99	4794.43	4674.24	3847.21	4473.58	3759.92	3601.89	4567.74	4696.01	5311.59	5427.55	5103.53	4387.33	4822.64	5101.95	3685.54	3822.94	3597.88	4122.81
KIF2A	465.172	277.157	593.457	417.94	383.267	419.59	465.797	876.385	316.084	382.394	678.527	638.457	581.488	588.484	1090.57	972.08	571.614	285.894	917.95	801.14	769.979	600.784	710.293	482.448	426.248	885.406	746.716	758.549	734.889	633.978	479.103	681.145	681.623	466.017	533.75	463.487	375.622
RASGRP2	436.209	428.956	366.373	620.653	524.1	905.266	961.881	884.444	443.366	360.749	222.488	291.368	619.003	413.814	358.809	280.564	600.986	461.702	330.659	324.97	787.106	1046.09	968.758	260.187	277.768	255.089	382.445	251.1	391.055	315.404	371.704	380.713	357.376	240.525	159.736	196.631	717.097
PSME4	1330.57	2239.78	1671.47	1247.98	1151.81	1423.46	1846.48	2591.88	1120.08	1080.8	1403.77	1612.39	1737.43	1574.37	2011.45	1840.55	1558.95	1409.75	1330.04	1298.75	1711.98	1452.53	1800.51	1934.2	1894.88	2118.06	2012.58	2019.3	2051.2	1863.9	1803.68	1875.43	1953.23	1555.9	1529.18	1650.3	869.756
IFT80	818.001	880.437	714.174	699.903	660.909	640.924	636.032	559.073	551.555	526.693	602.316	561.842	573.281	751.431	445.419	509.906	595.337	622.723	582.356	673.635	746.15	806.115	820.092	538.013	612.1	791.599	971.916	807.544	912.708	1166.52	1090.74	1064.34	1360.43	566.236	605.826	620.324	596.577
SIRT2	2484.72	1405.37	2406.75	2854.67	3166.73	2237.47	1924.81	2396.46	3017.64	3689.74	3670.44	2340.23	2422.08	2393.79	2324.31	2252.67	1851.53	1667.71	1727.33	1735.43	2006.12	2080.35	1993.87	2058.56	2076.69	2710.53	2647.88	3012.32	2901.19	3448.05	3448.93	2843.76	3019.02	2460.37	2425.25	2493	3077.29
ERLEC1	2232.83	1533.66	3006.12	3052.38	3192.88	2487.12	2486.69	2404.52	2740.81	3683.97	5415.93	3309.53	3231.01	2737.27	4226.17	4434.32	2814.01	2274.01	2758.79	2438.4	2583.97	2325.4	2390.32	2689.18	2726.17	2455.44	2480.36	2414.76	2620.81	2834.68	2326.96	2078.2	2372.64	2277.47	2288.89	2457.89	2246.7
PPP2R5B	1465.73	1176.2	1354.91	1519.93	1741.3	1519.97	1304.44	1261.19	1721.49	2018.75	1536.52	1686.69	1881.63	1947.15	1482.96	1637.98	1212.14	948.051	1161.01	917.362	1135.61	1269.17	1164.06	1048.68	1130.26	686.272	758.568	705.179	687.667	724.32	820.339	737.424	610.43	1225.17	1214.57	1136.48	1074.64
PYGM	74.6031	115.563	63.3133	102.608	77.4581	95.4568	136.815	67.4917	62.5803	38.9609	54.0855	22.0558	64.4795	37.5129	26.513	24.4475	267.732	128.159	83.8987	152.329	203.292	317.714	255.55	119.95	134.339	29.6232	33.9775	30.6219	30.2514	54.6806	43.4163	27.312	28.9003	101.471	52.5958	60.862	146.633
PAGE1	0	0	0	0	0	0	0	0	0	0	0	0	0	0	0	0	0	0	0	0	0	0	0	0	0	0	0	0.874912	0	0	0	0	0	0	0	0	0
PITX1	336.153	7.83481	590.08	308.658	290.719	117.485	37.5979	63.4623	195.166	494.948	403.183	124.209	148.889	169.98	134.333	67.5217	5.64836	0	0	6.7702	2.23398	1.68997	3.88669	1.76398	0	1018.71	1387.55	1567.84	1252.85	1199.8	1555.37	1248.9	1183.5	0	3.89599	0	2.00868
TRPC7	38.6181	23.5044	56.5599	30.0316	25.1487	19.9305	4.17755	27.1981	22.2743	38.9609	19.6675	70.8107	58.6177	78.5427	56.5611	44.2384	16.9451	88.7257	4.93522	3.3851	1.48932	9.29483	4.85837	82.9069	89.8958	3.29147	0	0.874912	2.21352	3.16989	2.28507	3.31055	1.40977	33.8238	56.4918	33.9423	2.00868
MAST4	4298.02	2979.19	3784.45	2334.12	2275.46	2213.34	1870.5	1376.02	2080	2572.86	1873.33	1817.86	1803.08	2241.4	1201.92	995.364	6304.7	1965.11	3247.37	3877.07	4779.98	5789.83	5485.1	2634.5	2465.57	1114.99	1423.9	1963.3	2169.25	2474.1	2323.15	1435.95	1271.61	2432.81	2440.84	2340.85	6191.74
GPR116	2274.96	4260.18	2210.06	3329.34	1798.64	2213.34	3344.13	1328.68	2711.11	1164.5	2564.15	1236.28	1199.32	1157.04	638.08	1392.34	10051.8	20985.3	6626.76	4388.22	7053.43	8113.54	9177.45	11379.4	9367.35	441.88	975.076	1045.52	1772.29	834.474	1013.05	680.317	431.389	10434	14194.1	18433	8627.26
SDK2	19.309	34.2773	24.4812	30.8658	43.2558	33.5672	40.7311	26.1908	38.1846	40.4039	49.1687	39.4682	28.1365	31.6515	22.9779	27.94	22.5934	78.8673	27.1437	29.3375	13.4039	19.4346	25.2635	101.429	99.9965	103.681	135.12	119.863	106.987	72.115	118.062	100.972	54.2761	76.4168	116.88	110.02	132.573
ADAM7	0	6.85546	2.53253	0	2.0119	0	2.08877	1.00734	0	0	0	0	0	4.68911	0	0	0	3.28614	0	0	0	5.06991	0	12.3478	11.1107	7.40581	15.8035	20.123	25.8244	7.13226	35.7994	6.62109	5.63907	13.7801	8.76597	7.02254	1.00434
NUP133	1031.28	1040.07	1026.52	982.701	937.545	844.426	952.481	1211.83	851.729	875.898	1212.01	941.434	817.131	847.558	1157.73	1182.79	1119.51	1358.82	1416.41	1349.53	1074.55	1005.53	1214.59	1388.25	1607.01	1207.97	1108.62	1152.26	1190.87	1107.88	1067.13	1313.46	1462.64	1371.74	1481.45	1473.56	1174.07
NUCKS1	9744.04	16650.9	8141.25	9859.54	11262.6	9735.55	8304.97	5766.01	15453.1	14636.3	11591.5	10765.5	8051.73	9114.47	7497.88	9206.24	12162.1	16759.3	7981.48	8987.44	8084.04	9948	9064.74	10092.6	10098.6	7715.21	9809.24	7528.62	7888.99	8394.67	9732.1	8462.59	7308.95	10990.2	11150.3	10875.6	13902
VPS35	4081.23	4022.2	4818.57	4736.65	4535.82	3731.21	3894.52	4751.62	4877.02	5238.07	6963.51	5901.66	5041.12	4971.63	6133.34	6491.4	4087.15	4395.21	4134.48	3822.91	3579.58	3251.5	3397.94	4902.97	4728.12	5083.68	4398.91	4751.65	4440.32	4298.37	4113.88	4084.39	4117.23	5000.91	5057.97	4898.22	5746.82
DNAJA2	2337.27	2694.2	2798.45	2083.86	1932.43	2015.08	2143.08	2355.16	1984.54	2160.16	3402.47	2376.22	1973.07	1928.4	2877.55	3046.63	2634.4	2826.08	2641.57	2621.2	2543.02	2346.52	2350.48	3773.15	3965.52	2837.25	2633.65	2821.59	2701.97	2543.84	2326.96	2437.39	2507.98	3711.85	3720.67	3746.52	2542.98
BCL3	3860.05	3369.95	3175.8	4034.25	4350.73	4929.14	4655.88	4678.08	4402.9	4581.51	4688.23	5042.65	5507.72	5575.36	5210.69	5868.57	1169.21	662.157	2173.96	1594.38	1024.65	1091.72	896.854	809.665	847.445	4336.51	4539.56	3585.39	4042.63	2426.55	3442.84	4002.45	3461.69	592.543	515.244	382.728	1197.17
KCNAB2	1503.47	629.723	1572.7	1756.01	1869.05	2136.76	1908.1	7636.64	2011.06	1878.78	1370.58	3445.34	3953.18	3530.9	4060.03	3331.85	722.99	575.074	720.542	551.771	1108.8	691.197	1106.74	5216.08	5104.87	2329.54	1977.81	2445.38	2330.84	1865.48	2550.9	2491.19	2411.41	2372.68	2220.71	2529.28	663.867
ABCC9	609.112	231.127	213.577	492.185	278.648	585.329	687.207	270.974	280.02	132.756	326.972	378.431	245.022	293.07	176.753	254.953	1493.43	202.097	1162.24	992.963	1259.22	1271.7	1331.19	281.354	441.399	163.751	218.088	251.1	428.685	322.537	297.059	217.668	124.765	214.217	111.036	101.827	563.433
GAL	0	15.6696	1.68836	1.66842	1.00595	0	0	1.00734	1.06068	2.88599	0	0	0	0	0	0	10.167	11.5015	8.63663	2.25673	1.48932	0.844985	1.94335	0.881988	2.02013	0	5.53123	2.62474	4.42704	0	0	0.827637	0	6.26367	4.86999	4.68169	1.00434
CLEC2D	1203.3	115.563	947.167	971.022	1070.33	1223.11	1244.91	1447.55	757.328	786.433	304.846	509.605	574.453	500.563	399.463	311.997	335.513	29.5752	338.062	380.26	460.2	516.286	632.559	40.5715	31.312	187.614	267.079	265.973	307.679	305.102	319.148	302.915	379.933	42.5929	38.9599	26.9197	309.336
FUNDC1	384.425	711.009	446.57	485.511	376.225	355.603	355.092	315.297	457.154	431.456	689.59	532.821	438.46	366.923	590.356	685.695	729.768	910.26	864.897	814.681	670.195	625.289	581.061	753.218	792.901	508.532	528.627	503.949	508.372	480.239	525.566	409.68	416.587	803.002	735.368	747.9	508.195
MAOB	4959.79	3332.73	6337.24	4767.52	4120.37	3242.39	3830.81	1615.77	3654.05	4464.63	8450.86	3331.58	2378.71	2631.77	3360.08	3656.65	4976.21	2909.87	2778.53	4432.22	5654.21	5013.29	3640.86	9040.38	9036.04	652.534	817.832	2604.61	3885.47	6972.97	3286.69	1289.46	1375.23	10876.2	9951.33	9224.1	13571.6
RORA	3168.44	637.558	3281.32	2098.88	1871.07	1591.3	1875.72	1543.24	1421.32	1636.36	1832.76	1150.38	1024.64	1010.5	1265.55	1088.5	1641.41	708.163	1842.07	1401.43	1825.91	1775.31	1876.3	1434.11	1487.83	213.946	250.486	202.98	270.787	279.743	270.4	338.503	376.408	2025.67	1949.94	1841.07	2344.12
DRD4	287.002	143.965	182.342	249.429	260.541	248.607	274.674	133.976	248.2	213.563	83.5867	119.566	92.616	141.846	58.3286	60.5367	89.2441	231.673	151.758	201.978	111.699	92.1033	89.3939	52.0373	49.4932	40.3205	47.4105	42.8707	50.911	41.2086	76.9306	62.9004	42.9979	61.3839	54.5438	77.2479	227.985
TGFBR3	1193.65	1662.94	1186.07	1217.95	863.104	608.406	700.784	440.207	840.061	870.126	1389.01	572.289	366.947	505.252	516.12	435.399	1545.39	9720.39	1248.61	820.322	1168.37	1182.98	1317.59	5524.78	5337.19	293.764	293.945	346.465	424.996	504.805	334.382	517.273	577.3	6246.13	6811.16	7258.96	2020.73
KIAA1107	223.809	114.584	222.863	196.04	173.023	212.942	204.7	197.438	143.192	122.655	196.675	201.985	226.264	165.291	141.403	111.76	164.932	147.876	181.369	200.849	168.293	179.137	192.391	167.578	172.721	130.836	96.4014	117.238	134.287	220.308	131.011	173.804	181.86	170.372	182.137	162.689	336.453
PLA2G10	7.02147	0	10.9743	9.17632	2.0119	5.24488	13.577	7.05137	1.06068	12.987	6.14608	15.0908	15.2406	2.34456	3.53507	3.4925	3.38902	8.21534	8.63663	2.25673	8.19127	0.844985	7.77339	0	2.02013	8.22868	8.69193	6.12438	7.3784	6.33978	15.2338	3.31055	5.63907	1.25273	5.84398	1.17042	2.00868
HES2	9.65452	222.313	7.5976	5.83948	24.1428	65.0365	59.5301	7.05137	24.3957	14.43	3.68765	9.28664	7.03412	18.7565	19.4429	30.2684	136.69	88.7257	72.7944	56.4183	110.21	207.866	232.23	156.112	253.526	163.751	261.548	317.593	199.955	294.008	370.943	431.199	520.205	305.667	240.577	159.177	415.796
ATP1B3	2399.59	5530.4	2112.98	2255.71	1850.95	1733.96	2557.7	4256.01	1933.63	2047.61	2870.22	3209.7	3111.43	3235.49	4777.65	5626.42	3532.48	8593.25	3979.02	2876.21	2909.39	2568.75	2831.46	5167.57	5236.18	2721.22	2399.76	2133.91	2415.69	2012.88	2122.07	2428.29	2764.56	2971.48	3444.05	3479.67	2283.86
NEDD4	1279.66	267.363	1490.82	1151.21	886.241	852.818	901.306	1109.08	711.718	754.687	1387.79	1373.26	1118.43	1080.84	1491.8	1934.85	991.852	407.481	1133.87	1090	1056.67	1015.67	940.58	701.181	711.086	1680.3	1973.86	2479.5	2182.53	1764.05	1500.53	2083.99	1987.77	732.849	599.008	656.607	1020.41
PIGB	423.921	300.661	465.986	382.903	360.13	363.995	401.045	516.765	284.263	327.56	382.286	392.361	411.496	431.399	470.164	487.786	336.642	261.248	297.347	385.901	386.479	413.197	381.868	396.013	373.724	302.815	338.195	393.71	411.715	416.048	358.756	313.674	348.918	398.369	396.417	356.979	399.726
MAPK6	1946.7	1259.45	2269.15	1712.64	1713.13	1658.43	1697.13	1873.65	1801.04	1773.44	2891.12	2261.3	1568.61	1903.78	2509.9	2360.93	1077.71	887.257	927.821	853.045	1076.03	923.568	967.787	1708.41	1749.43	2345.17	2262.27	2209.15	1831.32	1454.19	1755.69	2257.79	2289.46	1421.85	1494.11	1429.09	1204.2
GNB5	654.752	1227.13	675.342	513.874	649.843	520.292	584.857	397.899	747.782	725.827	915.766	480.584	345.844	403.264	447.186	440.055	715.083	1413.04	946.328	823.708	610.622	578.814	518.874	1884.81	1851.45	628.671	656.636	636.061	688.405	857.456	738.077	696.87	676.689	2937.66	2826.54	2606.53	1164.03
RAB27A	538.02	1403.41	525.923	731.603	750.438	912.609	1020.37	1557.35	921.734	757.573	882.577	1701.78	1288.42	1148.83	1472.36	1632.16	1198.58	1123.86	2060.45	1251.36	1140.08	936.243	1049.41	788.498	748.458	2622.48	3063.51	3019.32	2769.11	2099.26	2211.18	2956.32	2648.25	600.059	714.914	743.218	906.917
CECR5	1658.82	1149.76	1535.56	1802.73	1905.27	1444.44	1213.58	1458.63	1702.4	2157.28	2298.63	1215.39	1372.83	1239.1	1546.59	1384.2	991.852	990.77	1924.73	1684.65	1254.01	974.267	906.571	1640.5	1778.73	1459.77	1139.43	1363.99	1123.73	1208.52	1121.97	1274.56	1267.38	1688.68	1633.39	1694.77	1364.89
UFD1L	1611.43	1121.36	1566.79	1551.63	1504.9	1607.03	1687.73	1630.88	1442.53	1340.54	1499.64	1289.68	1467.79	1398.53	1502.4	1698.52	1497.95	1220.8	1378.16	1298.75	1434.22	1425.49	1508.04	1097.19	1118.14	1356.91	1630.92	1447.1	1401.16	1310.75	1415.22	1185.18	1242.01	1255.24	1177.56	1209.05	1205.21
LRP6	574.883	1987.1	956.453	785.827	536.171	622.043	828.199	249.82	534.584	375.179	715.404	147.425	191.094	167.636	95.4468	117.581	1293.47	1761.37	895.742	857.559	1164.65	1362.12	1337.99	2481.92	2584.76	858.251	828.104	1049.89	1094.95	1516.79	1117.4	575.208	548.4	2571.86	2932.71	2648.67	2075.97
GUCY2C	59.6825	54.8437	86.9503	75.079	49.2915	69.2324	82.5066	82.6018	47.7307	49.0619	60.2316	106.796	110.201	132.467	49.491	61.7009	83.5957	72.295	41.9493	75.6006	53.6156	58.3039	40.8103	90.8448	84.8455	61.7151	42.6695	57.7442	59.7651	88.757	70.8371	37.2437	55.6859	53.8675	80.8418	67.8845	49.2125
SCT	24.5751	20.5664	16.8836	12.5132	8.04759	18.8816	32.376	25.1835	21.2137	1.443	2.45843	22.0558	16.413	32.8238	12.3727	12.8058	9.03738	65.7227	28.3775	7.89857	10.4253	10.1398	14.5751	6.17392	15.151	4.93721	17.3839	13.9986	22.873	11.8871	28.1825	25.6567	22.5563	20.0437	14.61	16.3859	10.0434
PHRF1	3538.82	1606.14	3069.43	2862.18	3120.45	3127	2944.13	2966.61	2975.22	2848.47	2612.08	2929.94	3157.15	3235.49	2492.22	2557.68	1436.94	1449.19	1207.89	1206.22	1688.15	1724.61	1754.84	2069.14	1987.81	3070.12	3065.88	3110.31	3270.11	2981.28	3308.78	3094.53	2856.19	2008.13	2081.43	1882.04	2852.32
IKBKAP	966.329	1259.45	1088.15	937.653	830.914	914.707	1106.01	1246.08	657.624	650.791	811.283	688.372	834.716	799.494	767.11	800.948	1220.05	1367.03	1527.45	1620.33	1450.6	1480.41	1587.71	1718.11	1649.44	1161.89	907.121	902.909	873.603	782.171	807.391	1076.76	1086.93	1529.59	1620.73	1547.3	1474.37
NUCB2	5392.49	2293.64	5049.03	6281.61	6651.34	5527.06	4921.15	3771.48	7843.75	7834.02	9791.94	10233.9	6853.58	8491.99	7854.92	12103.9	6329.55	3517.81	5777.9	5456.78	4391.26	4431.94	3873.09	2017.99	2032.25	3822.22	4812.96	4229.32	4217.49	4280.94	4780.36	4775.46	4297.68	1981.82	1980.14	2327.97	4716.37
PFN2	1853.67	4934.95	2528.31	2143.92	1831.83	1892.35	2468.93	1009.35	1740.58	2174.59	3513.1	1177.08	1189.94	1200.41	1714.51	2001.2	1861.7	7684.63	2148.05	2006.24	1653.89	1676.45	1801.48	6394.42	6214.93	3416.55	2792.48	2103.29	1885.18	1829.82	1866.14	2884.31	3692.18	6204.79	6728.37	7672.12	2318.01
PTPN3	1018.11	4686.2	1186.91	1010.23	1115.6	665.051	590.079	434.163	808.241	991.338	1223.07	617.562	603.762	581.45	456.024	462.175	1128.54	3164.55	806.908	1320.19	1476.66	1413.66	1234.03	4728.34	4406.91	1908.23	1272.18	1353.49	1179.81	1525.51	1230.13	1826.59	1820.72	3793.28	4502.79	4076.58	1401.05
SPTB	396.713	1042.03	325.008	316.166	319.892	298.958	247.52	153.116	313.962	213.563	119.234	134.656	164.13	158.258	88.3767	86.1484	153.635	1306.24	101.172	109.452	144.464	171.532	192.391	1307.99	964.612	273.192	319.231	284.346	273.001	360.575	371.704	237.532	282.659	1236.45	1427.88	1431.43	228.989
DAPP1	107.077	80.3068	134.224	185.195	259.535	307.35	378.068	1021.44	171.831	191.918	156.11	352.892	445.495	400.919	501.98	349.25	66.6507	14.7876	106.107	41.7496	85.636	68.4438	103.969	35.2795	36.3624	329.97	311.329	215.228	323.174	233.78	195.754	247.463	289.003	28.8129	23.3759	21.0676	83.36
FGF10	0	10.7729	0	0	0	0	0	0	0	0	0	0	0	0	0	2.32834	0	6.57227	0	1.12837	0	0.844985	0	1.76398	18.1812	0.822868	0	0	0	0	0	0	0	5.01093	1.94799	1.17042	0
SLC44A1	832.921	3069.29	759.76	1037.76	1113.59	1200.03	1327.42	1565.4	928.098	1017.31	1264.86	1200.3	1366.96	1030.43	1398.12	1601.9	3373.2	3425.8	2941.39	2854.77	2796.95	2582.27	2676.96	3194.56	3389.78	1979	1230.3	1016.65	1471.99	1920.95	1160.05	1822.46	1912.35	3284.67	3196.66	3577.98	3089.34
TMEM260	343.174	627.764	418.712	346.198	315.868	330.428	313.316	482.515	308.659	288.599	371.223	365.662	369.292	295.414	365.88	396.981	506.093	520.853	525.601	552.9	557.751	583.884	557.74	721.467	784.821	313.513	263.128	258.974	262.671	337.594	279.54	264.844	331.296	591.29	643.812	695.231	572.473
SMG6	1065.51	1842.16	931.128	1122.01	1181.99	1160.17	1281.46	1140.31	1156.14	1219.33	1226.76	1106.27	1034.02	1017.54	855.487	704.322	1913.66	1789.3	2037.01	1676.75	1596.55	1667.15	1779.13	1736.64	1857.51	1630.92	1682.28	1622.96	1934.62	1863.1	1711.52	1482.3	1321.66	2103.34	2052.21	2078.67	2099.07
EXOC5	975.106	1110.58	1302.57	822.532	741.385	847.573	935.771	1537.2	718.083	689.752	1215.7	1019.21	913.264	1015.19	1387.51	1327.15	1447.11	1514.91	1450.95	1330.34	1490.07	1221	1334.11	2070.91	2058.51	1195.63	946.63	925.657	980.59	886.777	711.418	892.192	939.611	1733.78	1869.1	1970.99	1778.68
CLTCL1	660.896	428.956	498.909	418.774	384.273	509.802	980.679	341.488	288.506	427.127	322.055	379.592	453.701	406.781	461.326	742.739	347.939	184.024	318.321	309.172	332.119	429.252	417.82	187.864	176.761	80.641	67.1649	57.7442	81.9003	65.7753	73.8839	81.936	77.5373	264.327	235.707	222.38	383.657
FGF22	19.309	26.4425	23.637	13.3474	19.113	15.7346	9.39948	9.06605	10.6068	14.43	1.22922	4.64332	9.37883	5.86139	5.3026	3.4925	4.51869	13.1445	3.70141	4.51347	8.93593	10.1398	5.83004	15.8758	13.1308	7.40581	3.1607	3.49965	8.85408	8.7172	9.14027	5.79346	5.63907	22.5492	22.4019	14.0451	3.01301
FSTL3	11910.2	3339.59	7539.35	14523.6	13958.6	17226.3	15787	4426.25	18296.8	15310.2	13865.6	5205.16	4548.73	4523.82	4151.94	9364.57	5547.82	1436.04	16721.7	10993.7	5889.52	5162.86	4156.82	1614.04	1682.77	3440.41	3016.89	2937.08	2600.89	4294.41	4345.44	4894.64	5143.54	1594.73	1579.82	1319.07	11459.5
DGCR2	6846.81	3983.02	6507.77	8383.82	10022.3	7449.83	5017.24	4074.69	11990	11652.2	12318	7342.25	5717.57	6156.81	6172.23	5792.9	5557.99	5408.98	6035.77	6173.29	5493.36	4854.44	4192.77	5714.4	5946.25	4036.99	3762.82	3807.62	4112.72	4582.87	4457.41	3795.54	3723.2	5475.7	5514.77	5293.82	5865.33
RNF126	2979.73	1235.94	2781.57	3129.13	3413.19	3267.56	2663.19	2013.67	3804.67	4005.76	3631.11	2449.35	2814.82	2605.98	2667.21	2982.6	2156.54	1409.75	2576.18	2216.11	2298.02	2371.03	2165.86	1681.07	1889.83	2719.58	2869.92	2678.98	2706.4	2327.49	3055.9	2529.26	2507.27	1619.78	1671.38	1601.14	2673.55
MNT	1631.61	641.475	1505.17	1522.44	1469.69	1324.86	1287.73	1446.54	1212.36	1334.77	957.56	862.497	989.467	1009.33	828.974	812.589	547.891	494.564	774.829	807.91	715.619	702.182	686.001	668.547	575.737	837.679	874.724	846.915	775.47	729.075	883.56	918.677	964.282	487.313	630.176	579.359	777.357
ZXDC	2137.16	1635.52	2004.08	1597.51	1639.7	1518.92	1720.11	1863.58	1325.85	1454.54	1337.39	1362.81	1565.09	1591.95	1345.09	1441.24	715.083	1021.99	829.116	756.006	826.573	851.744	937.665	1528.49	1489.85	886.229	889.738	914.283	1070.61	1216.45	1073.22	1035.37	1218.75	1445.65	1476.58	1415.04	1809.82
JMJD6	1195.4	1359.34	973.337	1145.37	1241.34	1083.59	1215.67	1679.23	1200.69	1347.76	1183.74	1360.49	1307.17	1407.91	2131.65	2820.78	892.441	1092.64	2233.19	1666.6	1091.67	936.243	978.475	896.1	966.633	1367.61	1197.91	1241.5	1180.54	836.059	1037.42	1204.21	1096.8	875.661	869.779	812.273	1123.85
POLB	288.758	587.611	309.813	311.161	322.91	313.644	363.447	514.75	272.596	230.879	347.868	384.235	344.672	325.893	402.998	372.534	585.17	547.142	553.978	500.995	557.751	411.508	593.692	449.814	516.143	698.615	660.587	492.575	517.964	484.994	481.388	547.896	617.479	492.324	492.843	530.201	430.861
ST6GALNAC1	0.877683	7.83481	2.53253	7.5079	2.0119	11.5387	24.0209	8.05871	12.7282	1.443	4.91687	6.96498	3.51706	2.34456	0	2.32834	3.38902	0	7.40282	2.25673	1.48932	4.22492	3.88669	7.05591	2.02013	3.29147	1.58035	3.49965	5.16488	2.37742	6.09351	4.96582	2.81954	6.26367	1.94799	7.02254	14.0607
WIPI1	970.718	521.994	1227.43	978.53	804.759	831.838	979.635	1796.09	788.088	808.078	977.227	1110.91	1109.05	1261.37	1180.71	1372.55	745.584	627.652	661.319	570.953	672.429	611.769	750.132	1282.41	1187.84	755.393	587.1	578.317	622.737	725.113	536.229	682.8	688.672	1104.91	1093.8	1074.45	469.026
FRMPD1	7.89915	69.534	16.0394	25.0263	36.2142	25.1754	16.7102	12.0881	12.7282	18.7589	25.8135	42.9507	39.86	28.1347	28.2805	13.97	55.3539	131.445	2.46761	13.5404	11.1699	90.4134	38.8669	105.839	71.7146	4.93721	5.53123	1.74982	10.3298	1.58495	12.9487	2.48291	2.11465	60.1312	91.5557	95.9747	54.2342
GBA2	3585.34	5631.27	3295.67	2768.75	3021.87	2495.51	2421.93	2752.05	2664.44	2568.53	2176.94	1574.09	2086.79	1882.68	1617.29	1416.79	2810.62	4587.45	1893.89	2581.7	3431.4	4224.92	3842	5796.43	5874.54	966.047	1114.94	1049.89	1094.22	1068.25	1064.84	1374.7	1567.66	4987.13	5005.37	4986	3687.93
NDST1	5656.67	2531.62	6134.64	4270.33	4151.55	3510.92	3309.66	2513.31	5118.86	4991.32	4876.3	3123.79	2985.99	2790.02	2780.33	3468.06	5939.82	2280.58	5469.45	4071.15	4502.22	4187.74	3891.55	4261.77	4213.99	3241.28	2659.73	3689.5	3757.08	3094.61	3585.27	3597.74	3448.29	4136.53	4087.87	3641.18	5476.65
ASNS	2566.35	978.372	3207.88	2424.22	2835.77	2129.42	2550.39	1327.67	2718.53	2860.02	3327.49	948.398	1072.7	1080.84	1484.73	1004.68	1644.8	532.354	2220.85	2803.99	2032.18	2707.33	2790.65	380.137	409.076	1337.98	1846.64	1510.97	1396.73	1107.08	1650.58	2056.68	2966.86	350.765	375.963	310.162	580.507
AP3M2	587.17	660.083	541.118	507.2	462.737	538.125	582.768	624.55	457.154	444.443	431.455	369.144	459.563	410.298	399.463	392.325	1248.29	1156.72	1210.36	1266.03	1122.2	1022.43	1251.52	977.243	988.854	1310.01	1004.31	932.656	861.797	767.114	805.106	962.542	1060.85	1036.01	1101.59	1100.2	1201.19
CNGB1	0.877683	0.979352	5.06507	0.834211	7.04164	5.24488	4.17755	10.0734	4.24273	1.443	3.68765	5.80415	14.0682	4.68911	1.76753	6.98501	1.12967	4.92921	1.2338	5.64183	1.48932	0	4.85837	3.52795	3.0302	14.8116	3.95088	13.9986	9.59192	2.37742	13.7104	13.2422	11.2781	1.25273	0.973997	2.34085	0
ST6GALNAC2	29.8412	525.912	12.6627	36.7053	37.2201	13.6367	28.1985	88.6458	23.335	34.6319	6.14608	15.0908	24.6194	16.4119	45.9559	66.3576	231.583	405.838	46.8846	81.2424	122.124	250.96	132.148	627.976	582.808	83.9325	45.04	31.4968	30.9893	284.498	56.365	69.5215	61.3249	541.181	574.658	557.121	366.583
CHAT	0.877683	0	1.68836	6.67369	0	0	2.08877	0	1.06068	0	6.14608	1.16083	0	3.51684	1.76753	3.4925	0	0	0	0	0	0.844985	0	0	0	0	0	0	2.21352	0	1.52338	5.79346	0	0	0	0	0
PABPC1	25922.4	13253.6	34884	30260.2	29940.1	27459.1	27271	50298.4	28963	38982.5	50267.6	90919.7	77425.8	79739.6	103629	114608	26969.8	16869.4	39940.7	33011.5	27278.4	23862.4	27242.8	20957.8	22452.7	54595.6	46471.8	44414.9	47789.2	51399.8	45472.1	53967.7	59601.5	24577.4	24170.7	23772.5	26891.1
TESK2	103.567	92.0591	96.2363	96.7685	106.631	140.563	131.593	275.004	82.7333	135.642	93.4204	112.601	144.2	139.501	197.964	104.775	119.745	72.295	66.6254	108.323	113.933	121.678	104.941	159.64	199.993	176.917	77.4372	77.8672	87.0651	82.4172	63.2202	105.938	74.7177	226.745	203.565	202.483	191.829
C16orf80	444.108	505.345	392.543	515.543	438.594	447.913	419.844	475.464	453.972	526.693	668.694	804.456	642.45	806.528	871.394	1080.35	821.272	734.452	736.581	693.945	767.001	708.942	733.613	901.392	818.153	836.856	726.171	720.928	767.354	683.112	727.413	678.662	756.341	786.717	756.796	783.013	710.067
CSNK2A2	1271.76	1689.38	1260.36	1227.96	1181.99	1222.06	1145.69	2044.9	1247.36	1451.65	1824.16	2777.87	2436.15	2563.77	2495.76	3055.94	2380.22	2024.26	3242.44	2959.71	2326.32	2191.89	2140.6	2103.54	2180.73	3165.57	2731.64	2952.83	2785.35	2698.37	2771.03	2705.54	2707.46	2246.15	2135	2181.67	2046.84
PTPN21	393.202	1350.53	345.269	317.834	287.701	286.371	415.666	226.651	246.079	190.475	339.264	182.25	192.266	196.943	111.355	167.64	561.447	1997.97	404.688	441.191	469.881	720.772	617.984	1760.45	1541.36	350.542	363.481	334.216	408.026	528.58	378.56	448.579	427.865	1807.69	1870.07	2030.68	1026.43
EIF2B3	508.179	572.921	579.95	589.787	481.85	490.921	525.327	485.537	553.677	556.996	768.26	479.423	540.455	500.563	692.873	746.232	458.647	627.652	482.417	463.759	432.648	391.228	435.31	743.516	847.445	767.736	717.479	705.179	716.443	626.846	622.3	744.046	795.814	749.135	856.143	811.103	653.824
CAMK2A	9.65452	25.4631	3.37671	2.50263	2.0119	9.44079	7.31071	3.02202	0	8.65797	3.68765	0	1.17235	5.86139	0	9.31334	7.90771	121.587	1.2338	1.12837	6.70195	10.9848	13.6034	115.54	114.137	16.4574	15.8035	10.4989	8.11624	6.33978	13.7104	11.5869	11.983	179.141	179.215	150.985	0
TCOF1	3752.1	2587.45	3249.24	2926.41	3074.18	3015.81	2613.06	2226.22	3543.74	3868.67	3012.81	3692.6	3216.94	3522.7	2798.01	3106	3854.44	2581.26	4030.84	4206.55	3311.51	4038.18	3234.7	1382.96	1294.9	3535.86	4263.79	3974.73	3943.02	3272.12	4449.79	4187.01	3692.89	1513.3	1660.66	1443.13	3034.1
CDC42	5161.66	7236.43	6100.87	5556.68	5137.38	5155.72	5360.84	7756.51	6033.17	6379.48	8932.72	8699.26	7322.52	6975.06	10923.4	10729	6015.5	8545.6	5764.33	4554.09	5092.73	4723.46	5302.42	8509.42	8655.25	10442.2	8808.88	8431.53	8150.92	7963.56	7026.58	8887.99	9384.13	8543.64	8535.14	8539.4	8405.3
OSBPL3	1763.27	2874.4	2040.38	1660.91	1831.83	2275.23	2500.26	2919.27	1419.19	1499.27	1479.98	2123.16	2456.08	2411.38	2205.88	1810.28	1613.17	1319.38	1294.26	1244.59	1657.61	2052.47	2094.93	1367.96	1327.23	1759.29	2011	1899.43	1784.84	1432.79	1747.32	2050.06	2047.69	1385.52	1577.88	1450.15	1171.06
EPHA8	0.877683	0	0	1.66842	4.0238	5.24488	5.22194	0	0	1.443	0	8.12581	2.34471	4.68911	3.53507	5.82084	1.12967	1.64307	0	0	1.48932	0	1.94335	7.05591	5.05033	1.64574	1.58035	0.874912	0	0.792473	5.33182	3.31055	0	0	0	2.34085	1.00434
SLC12A3	21.9421	2423.9	5.90924	6.67369	6.0357	20.9795	28.1985	27.1981	8.48547	2.88599	1.22922	15.0908	25.7918	12.8951	17.6753	5.82084	33.8902	35260.3	4.93522	9.02693	17.1272	7.60486	10.6884	31487.9	21939.6	2.4686	5.53123	6.12438	12.5433	11.0946	11.4253	12.4146	5.63907	16943.2	25781.7	28802.9	10.0434
RAD18	193.968	222.313	211.889	186.863	175.035	228.677	244.387	387.825	168.649	139.971	212.654	283.243	246.194	242.662	341.134	355.071	199.952	190.596	219.617	221.16	176.485	179.137	241.947	222.261	211.104	395.799	310.539	310.594	258.982	217.93	281.063	316.985	274.2	250.547	265.901	197.801	201.872
ATP2B1	2360.97	2141.84	2708.97	2363.32	2475.64	1723.47	1772.32	4082.74	3242.51	2815.28	2660.02	3122.63	2532.28	2308.22	2608.88	2550.69	2135.08	2568.12	2171.5	1614.69	1893.67	1407.74	1460.42	2422.82	2250.43	2178.13	2361.04	2660.61	2867.25	3222.99	2810.63	1680.93	1402.72	1950.51	2114.55	2049.41	1355.86
TRPM5	0	91.0797	1.68836	0	4.0238	2.09795	5.22194	7.05137	3.18205	1.443	0	0	2.34471	1.17228	1.76753	3.4925	0	80.5104	11.1042	1.12837	5.95729	7.60486	4.85837	21.1677	33.3322	0	0.790175	2.62474	2.95136	2.37742	4.57014	0.827637	2.11465	16.2855	17.5319	19.8972	3.01301
NCK2	1398.15	1470.99	1414.84	1524.1	1571.29	1416.12	1432.9	1176.57	1507.23	1624.81	2458.43	1512.56	1364.62	1307.09	1352.16	1352.76	3594.62	2127.77	2537.93	2236.42	2695.67	2919.42	3109.35	2062.97	2119.12	1654.79	1340.93	1452.35	2045.29	2533.54	2036.76	1719	1753.75	2236.13	2231.43	2220.29	3787.36
MAP4K4	2531.24	2279.93	2506.36	2465.09	2483.69	3735.4	4384.34	3582.1	2748.23	2646.45	3223.01	4497.06	4306.06	4081.87	5277.86	5866.24	5781.66	2822.79	7917.32	5997.27	4251.27	4754.73	4798.12	1934.2	1825.19	11307	12836.4	11454.3	11601.8	6330.27	10577.6	9299.33	6988.22	1974.31	1824.3	1921.83	5202.47
MGAT4A	1579.83	2431.73	2230.32	2284.9	2210.07	1926.97	1847.52	6407.68	2519.12	2049.05	2242.09	3055.31	3131.36	3042.06	3602.23	2780.03	2793.68	2364.38	2419.49	1969	2381.43	2267.09	2619.63	4162.1	4444.29	2138.63	1835.58	1918.68	2047.51	2534.33	1888.99	1927.57	1907.42	4063.87	4415.13	4074.24	2651.45
RPL31	18218.1	16039.8	19909.9	18221.7	17493.5	15665.4	14872.1	15745.7	20651.5	22647.8	33340	20242.6	15084.7	15954.7	25107.8	22536	32498.4	21757.5	65732.1	60298.8	33019.7	25222.8	27011.5	23518.2	24563.8	40413.5	31863	35569.6	35408.9	38924.7	37200.9	45952.1	48706.1	25699.8	24387.9	26958.3	23059.6
WDR1	7548.08	13801	8663.8	8204.47	7057.74	7790.75	8058.49	10272.8	7501.15	7963.89	10791.3	8281.36	8396.4	7093.46	10934	10135.2	10049.6	13711.4	9615.04	7754.14	8793.7	8386.47	8628.46	14013.9	13957.1	11425.5	10623.1	10366.8	10373.3	8011.9	8423.52	9323.33	9571.62	12797.9	12993.1	13365.1	8945.64
SNX13	1966.01	1234.96	2383.11	1772.7	1644.73	1576.61	1487.21	2129.51	1521.02	1686.86	2207.67	1430.14	1456.06	1464.18	1569.57	1149.03	2566.62	1408.11	2727.94	2892	2711.31	2785.91	2536.07	2331.98	2330.22	1807.02	1789.75	2032.42	1954.54	2146.81	1741.22	1920.95	1960.99	1970.55	2036.63	2064.63	1672.22
MS4A12	0	0	0	0	0	1.04898	0	0	0	0	0	0	0	2.34456	3.53507	0	0	0	0	0	0	0	0	0	0	5.76007	0	0	0.73784	0	0	0	2.11465	0	0	0	0
ARHGAP10	581.904	510.242	500.597	511.371	549.248	430.08	543.081	707.152	501.703	627.703	682.215	387.717	334.121	334.099	491.375	413.28	956.832	496.207	952.497	953.47	959.868	1245.51	1107.71	926.97	985.824	845.908	521.516	619.438	548.953	529.372	574.314	801.98	797.224	984.649	882.441	794.717	1661.17
RPS6KA2	1439.4	2201.58	1811.61	1825.25	1168.91	1146.53	1284.6	1355.88	1842.41	1064.93	2057.71	921.699	854.646	704.54	874.929	949.961	4121.04	2341.37	3465.76	2124.71	3187.89	2926.18	2734.29	2649.49	2527.18	404.028	495.44	552.07	810.148	697.376	467.677	434.509	394.03	2605.69	2782.71	2655.69	3254.05
ING3	394.957	470.089	416.18	358.711	386.284	322.036	373.891	382.789	322.448	277.055	383.516	394.682	342.327	329.41	326.994	323.639	817.883	492.921	1186.92	1103.54	890.614	798.51	795.8	580.348	573.717	611.391	629.77	618.563	568.875	563.448	566.697	648.04	680.918	543.686	515.244	512.645	755.262
VASH1	905.769	305.558	938.726	1293.86	1207.14	1344.79	1408.88	3039.14	1077.65	826.837	677.298	1790	2209.89	1947.15	1424.63	1277.09	1599.62	299.038	1046.27	841.761	1476.66	1466.05	1513.87	247.839	269.687	341.49	495.44	602.814	741.529	785.341	699.992	403.059	377.818	263.074	265.901	330.059	1267.47
LMCD1	1267.37	940.178	1177.63	1034.42	794.7	845.475	1196.87	843.143	733.993	1031.74	1355.83	733.645	978.916	505.252	813.066	1186.29	1012.19	601.363	1219	677.02	741.682	788.371	878.393	634.15	774.72	599.871	674.81	607.189	768.829	672.81	583.454	470.098	417.292	1103.66	855.169	767.797	854.691
WBSCR22	2442.59	3423.81	2508.05	2702.01	2724.11	2449.36	2209.92	2013.67	3066.44	2800.85	3179.98	2465.6	2309.54	2378.55	2914.66	3558.86	3383.37	3327.21	2964.83	3280.16	3121.62	2919.42	2765.38	2795.02	2627.18	5504.16	6378.3	7945.95	6355.02	5940.38	7037.25	5585.72	5241.52	2457.86	2674.6	2704.85	1922.3
SEL1L	2990.27	2593.32	4227.64	3615.47	4000.66	3482.6	3647	4549.14	3314.64	3741.69	6469.37	4423.92	4048.14	3467.6	4970.31	5095.56	3161.95	4516.8	3713.75	2877.33	2890.77	2406.52	2501.09	5059.09	4987.7	3579.47	3342.44	3649.26	4058.12	3954.44	3234.13	3056.46	3115.59	4243.01	4815.44	4708.61	3489.07
TRIP13	163.249	64.6372	179.81	142.65	150.892	238.118	208.877	155.13	132.585	128.427	188.07	227.523	279.02	273.141	461.326	493.607	208.989	31.2183	204.811	215.518	294.886	241.666	238.06	65.2671	65.6542	977.567	1000.36	993.025	781.373	492.918	770.829	567.759	549.81	76.4168	94.4777	69.0549	84.3644
ATP6AP1	4958.03	7641.88	5865.35	6125.61	5671.54	4555.7	4056.4	7989.2	5935.58	6910.51	8792.59	6655.04	6396.36	6383.06	8321.55	8811.59	7124.84	9247.19	7096.84	6233.1	6012.39	5225.38	5460.8	9916.2	9795.61	6573.89	5380.3	5198.73	5307.28	5144.74	4917.47	5453.3	5823.75	8392.06	8573.12	8565.15	7007.26
TCF3	2073.09	1306.46	1736.47	2402.53	2897.13	2647.62	2371.8	1954.24	2998.55	2910.52	3404.93	2401.76	2384.57	2462.96	2182.9	2397.02	1989.35	1677.57	2254.16	2086.35	1965.9	1963.74	1895.73	1502.03	1481.77	4789.09	3548.68	3456.78	3336.51	3352.16	4001.92	3780.65	3425.74	1704.97	1658.72	1835.22	2201.51
TRIB2	909.28	3502.16	595.99	930.146	680.022	1021.7	1195.82	941.862	662.927	522.364	696.966	421.381	541.628	547.454	365.88	427.25	3699.68	3613.11	3817.39	3673.96	3726.28	3721.31	4110.18	1871.58	1992.86	859.074	1181.31	948.405	1165.05	870.928	979.532	1188.49	897.318	2252.42	2289.87	2415.75	6633.65
DAZAP1	7197	5975.02	6697.71	6523.53	6858.56	6416.59	5767.11	5838.54	6396.98	6751.78	6627.93	5109.98	5877.01	5605.84	6119.2	5840.63	4526.6	4546.37	5249.84	4920.81	4522.32	4703.18	4811.73	3752.86	3716.03	9059.77	8310.27	7437.63	6587.44	5837.36	7706.77	8659.56	8506.54	3399.92	3405.09	3188.23	4626.98
MBD3	2920.05	3334.69	2686.17	4020.9	4669.62	3808.83	2991.12	2342.06	5792.39	5808.06	4506.31	4415.8	4193.51	4178	3140.91	3414.5	3051.24	3458.66	2518.19	2310.89	2432.81	2827.32	2343.68	2901.74	3064.54	2764.01	2864.39	2563.49	2682.79	2669.84	2992.68	2298.35	2116.77	3036.63	3015.49	3003.3	2664.51
PRLH	0	0	0	0	0	0	0	0	0	0	0	0	0	0	0	0	0	0	0	0	0	0	0	0	0	0	0	0	0	0	0	0	0	0	0	0	0
HLTF	1092.72	933.322	1213.93	1080.3	978.789	900.022	965.014	951.935	662.927	959.592	1306.66	971.615	886.3	998.781	1138.29	1073.36	1164.69	1160.01	1342.38	1478.16	1450.6	1174.53	1115.48	1832.77	1777.71	1682.76	1718.63	1765.57	1797.38	1476.38	1947.64	1842.32	2245.06	1738.79	1943.12	1907.79	624.698
FAM50A	3211.44	3604.01	2745.27	3379.39	3538.93	3211.97	2987.99	3587.13	3834.37	4232.31	3626.19	3822.61	3996.55	3976.37	4265.06	4888.34	3250.07	3956.51	2790.86	2783.68	2889.28	3265.87	3010.24	3081.67	3075.65	4911.7	4722.88	4188.2	4238.15	4716.01	4857.29	4284.68	4249.75	3331.02	3185.94	3279.52	4559.69
FAM3A	2721.7	1819.64	3754.06	3040.7	3464.49	2660.2	2030.29	1757.81	3641.33	4414.12	3772.47	2190.49	2150.1	2168.72	2055.64	2000.04	2100.06	2875.37	2225.78	2351.52	2050.05	2095.56	1838.41	2846.18	2775.66	1910.7	2073.42	1945.8	2086.61	2192.77	2368.85	1830.73	1802.39	2936.41	2726.22	2716.55	2613.29
CPSF1	7295.3	4243.53	6266.33	6747.93	6965.19	8142.15	7870.5	7249.82	6183.78	4907.63	3980.2	6688.71	8663.7	9414.57	6843.89	7627.63	2559.84	1698.93	2171.5	2794.96	3106.72	3864.96	3813.82	2021.52	1974.68	3390.21	4162.64	3862.74	4023.44	4307.88	4733.14	4124.11	4122.87	2143.43	2073.64	2016.64	4445.2
MYO3B	130.775	1915.61	115.652	347.032	321.904	307.35	335.248	92.6752	291.688	372.293	512.583	90.5448	112.546	120.745	107.82	73.3426	4.51869	788.673	11.1042	3.3851	2.23398	5.06991	4.85837	1106.01	1157.53	163.751	423.534	434.831	442.704	171.967	361.041	486.65	335.525	1020.98	1242.82	1008.9	10.0434
CYBRD1	753.93	1117.44	875.412	787.495	624.694	1076.25	2121.15	2391.42	934.462	647.905	677.298	1062.16	1186.42	1015.19	1203.69	984.886	2407.33	3051.18	1184.45	1060.66	1379.11	2224	2529.27	2598.34	3404.93	499.481	469.364	480.327	795.392	978.704	381.606	453.545	441.963	2807.38	2515.83	2700.16	1346.82
CDH19	0	93.0384	0	0	1.00595	0	1.04439	0	0	0	0	0	0	0	0	0	3.38902	23.003	4.93522	0	0	0	1.94335	68.7951	61.614	4.93721	0	0.874912	0.73784	0	0	4.96582	0	23.8019	11.688	31.6014	1.00434
PDCD2	745.153	1804.95	786.774	769.977	737.361	801.418	862.664	1094.98	637.471	783.547	751.051	847.406	909.747	722.124	901.442	941.812	1929.48	1777.8	2282.54	2156.31	2060.48	1735.6	1872.41	2078.85	2069.62	2383.85	2273.33	2406.88	2220.16	2133.34	2231.75	2266.07	2424.1	2296.26	2136.95	2295.2	965.169
SLC6A15	0	3.91741	0.844178	0	0	3.14693	0	0	0	1.443	0	0	0	0	0	0	310.66	3.28614	792.102	732.31	324.672	303.349	237.088	4.40994	4.04026	85.5782	41.0891	133.862	67.1435	38.0387	44.9397	90.2124	102.913	1.25273	7.79198	8.19296	0
RDH11	1648.29	6120.95	1491.66	1590.01	1898.23	1416.12	1397.39	2046.91	2098.03	2354.97	2219.96	2304.25	1940.25	1981.15	2085.69	2316.69	3814.9	6031.7	2294.88	2296.23	2601.84	3209.25	2738.18	7103.53	6921.98	1639.15	1563.76	1555.59	1491.91	1776.72	1518.81	1377.19	1375.93	5765.08	5874.18	6199.73	3154.62
PRKACA	2931.46	3122.17	3071.12	2936.42	2831.75	2621.39	2270.5	3183.19	3322.06	3480.51	3843.76	3636.88	3241.56	3476.98	3494.42	3662.47	3263.62	3440.59	2861.19	2410.19	2642.06	2836.61	2811.05	3618.8	3771.58	3400.91	3243.67	2985.2	3454.57	3416.35	3349.15	3219.51	3081.05	4260.55	4424.87	4066.05	3642.73
LPHN1	265.06	1200.69	218.642	294.477	251.487	362.946	570.235	646.712	251.382	180.374	143.818	920.539	892.161	965.958	643.382	742.739	474.462	1112.36	354.102	288.862	455.732	536.565	533.449	681.777	617.15	875.531	930.827	855.664	831.546	1099.16	1241.55	813.567	785.946	694.014	817.184	809.932	377.631
SPP2	0	0	0	0	1.00595	1.04898	0	0	0	0	0	0	0	0	0	0	0	0	0	0	0	0	0	0	0	0.822868	0	0	0	0	0	0.827637	0	0	0	0	0
ACTN1	4213.76	2241.74	4005.62	5121.22	3982.55	4799.07	6490.87	4678.08	3263.72	3408.36	6163.29	3458.11	4250.96	3276.52	4993.28	5373.8	6718.16	1700.58	7654.52	6432.82	5035.4	6772.55	5954.41	1846	1901.95	6192.9	5675.04	5917.03	6974.8	5050.43	4727.81	5010.51	5149.18	1951.76	1391.84	1245.33	8501.72
ZFYVE26	968.085	821.676	1143.02	1001.89	962.693	987.087	1085.12	2748.02	854.911	849.925	790.386	1067.96	1273.18	1181.66	1332.72	1041.93	858.551	770.599	639.111	715.384	906.252	854.279	969.73	1191.57	1118.14	979.213	772.792	732.301	790.227	754.434	695.422	887.227	875.466	1037.26	1116.2	1110.73	1337.78
RPS6KA6	3.51073	218.395	0	0	2.0119	2.09795	7.31071	10.0734	5.30342	1.443	0	3.48249	2.34471	1.17228	0	0	51.9649	144.59	24.6761	49.6481	27.5524	39.7143	21.3768	445.404	522.204	3.29147	1.58035	3.49965	2.95136	4.75484	0.761689	4.96582	2.11465	413.402	524.984	413.159	0
EPN2	548.552	814.821	484.558	582.279	536.171	386.023	421.932	299.18	632.167	489.176	604.774	349.41	271.986	317.688	284.573	267.759	913.905	841.251	910.547	943.314	891.359	883.009	749.16	721.467	711.086	880.468	764.1	754.174	650.037	805.153	695.422	960.886	812.732	784.211	837.637	820.466	1006.35
PTPN18	4619.25	2326.94	4183.75	4564.8	5048.86	4215.84	3345.17	4750.61	5204.77	5144.28	4246.94	4053.62	4393.98	4337.43	3706.52	3064.09	2782.38	2328.23	3311.53	3422.34	2789.5	2877.17	2825.63	2654.79	2692.83	5125.64	5182.76	4903.01	5025.43	3990.1	5147.5	5444.2	5078.69	2900.08	2884.98	2819.55	3952.07
LIMS2	822.389	3195.62	707.421	1373.95	992.872	1118.21	1822.46	453.302	1364.04	522.364	597.399	307.62	649.484	358.717	155.543	244.475	1520.54	5034.36	682.294	713.128	1651.66	2954.07	2760.52	2483.68	2193.86	108.619	345.307	260.724	586.583	809.907	556.795	188.701	147.321	3369.85	2602.52	2907.33	4355.81
ASIC4	7.02147	1.9587	5.06507	8.34211	8.04759	10.4898	10.4439	7.05137	7.42478	1.443	4.91687	3.48249	3.51706	3.51684	1.76753	6.98501	10.167	0	2.46761	16.9255	5.95729	10.1398	11.6601	0.881988	1.01007	8.22868	7.11158	6.9993	4.42704	2.37742	7.61689	9.10401	9.1635	0	0.973997	2.34085	6.02603
SPEG	82.5022	679.67	40.5205	80.0843	89.5295	124.828	458.486	134.983	51.9735	49.0619	39.3349	89.3839	218.058	158.258	111.355	110.596	116.356	382.835	92.5353	64.3169	72.9768	289.83	174.901	396.013	279.788	1853.1	2344.45	1003.52	764.402	400.991	2513.57	2734.51	3128.28	395.864	152.918	150.985	60.2603
LNX1	398.468	1222.23	627.224	440.464	283.678	326.232	386.423	187.365	368.057	262.625	716.633	400.487	242.677	263.763	507.282	392.325	222.545	686.803	166.564	155.715	244.993	261.945	249.72	867.877	1027.24	294.587	225.99	341.216	322.436	397.821	313.816	262.361	261.512	945.814	1100.62	856.749	578.499
ALDH3A2	1785.21	4331.67	2004.92	1503.25	1397.26	1167.51	1205.22	1852.5	1201.75	1613.27	2192.92	1062.16	1182.91	1091.39	1576.64	1279.42	5018	6442.47	3565.69	4875.67	5293.05	5095.26	4568.81	10373.1	10587.5	5158.56	5369.24	5163.73	4933.94	7287.58	6248.9	5394.54	5985.88	19203.2	18714.4	19520.3	13041.3
TFRC	2813.85	2491.47	3503.34	2284.9	2328.77	3183.64	5272.07	12905	1576.18	2255.4	2469.5	2679.2	5813.7	4461.69	4731.69	6647.4	1076.58	3703.48	1939.54	1970.13	1960.69	1597.02	1812.17	3609.98	3182.72	8296.98	6996.21	8442.03	6844.94	3415.56	6022.68	10180.8	12441.2	5294.05	5394.97	5573.55	2862.36
SREBF1	3458.95	6029.87	3808.09	2996.49	3130.51	2817.55	2484.6	4508.85	3097.19	3425.67	3366.82	3553.3	3211.08	3060.82	3326.5	3104.84	2827.57	3388.01	2310.92	3130.09	3543.1	2960.83	2221.25	5377.48	5829.09	6510.53	5016.82	4293.19	4548.05	3473.41	4849.68	5762.01	6143.77	3877.21	4122.93	3979.44	3983.2
TRPC5	3.51073	2.93805	1.68836	12.5132	2.0119	5.24488	3.13316	1.00734	2.12137	7.21498	2.45843	0	3.51706	1.17228	0	0	1.12967	4.92921	3.70141	3.3851	0	5.91489	0	12.3478	11.1107	0	0	0	0.73784	0	0	0	1.40977	17.5383	13.636	4.68169	0
AFF4	5069.5	3912.51	6479.06	3711.41	3453.42	3468.96	4008.36	4694.2	3089.77	3640.68	4532.12	3615.99	3573.34	3600.07	4323.39	4201.48	3547.17	3555.6	4461.44	4075.66	3770.96	3679.91	3439.72	4828.89	4639.23	3240.45	2830.41	3561.77	3431.69	3696.89	3063.51	3603.53	3625.22	4205.43	4634.28	4531.88	4750.52
UBE2D1	426.554	571.941	527.611	486.345	375.219	529.733	631.854	1208.81	380.785	434.342	639.193	841.602	771.409	682.266	1138.29	1363.24	763.658	729.522	883.404	612.703	729.768	660.778	657.823	652.671	620.18	1282.85	954.532	880.162	917.873	681.527	578.122	1084.2	1107.37	569.994	570.762	733.855	518.238
MPP5	819.756	1773.61	929.44	853.398	802.747	607.357	600.523	879.407	729.75	782.104	1014.1	745.253	697.551	696.334	740.597	671.725	734.287	4743.54	742.75	687.175	670.939	675.143	660.738	5030.86	4432.17	831.919	821.782	823.292	861.059	1088.07	754.834	761.426	872.647	4975.86	5260.56	5721.03	2061.91
RHOBTB1	5962.1	1260.43	6351.59	5384	5541.77	5249.08	4103.4	2630.16	4326.53	4167.37	3967.91	1136.45	1368.14	1513.41	1359.23	825.395	2365.53	1268.45	1237.51	1611.31	2715.03	2847.6	3057.86	4337.62	3893.8	2387.96	1751.82	1836.44	1741.3	2365.53	1662.77	1909.36	2030.07	2786.08	2936.6	3004.47	3646.75
ASAH2C	1.75537	0	0	0.834211	0	0	0	0	0	0	0	0	0	0	0	0	0	0	1.2338	1.12837	0.744661	0	1.94335	1.76398	0	4.11434	0.790175	4.37456	0	0	0.761689	0.827637	1.40977	6.26367	0	0	0
SMC1A	1651.8	1668.82	2146.74	1981.25	1762.42	1744.45	1636.55	2462.94	1716.19	1904.75	2694.44	2307.73	1990.66	2057.35	2668.98	2600.75	1958.85	2223.07	2257.86	2033.32	2040.37	1880.09	1762.62	2919.38	2838.28	3911.91	3713.03	3660.63	3633.12	3172.27	3009.43	3271.65	3320.01	2683.36	2995.04	2746.98	2129.2
HSD17B10	2060.8	3155.47	2108.76	2108.05	1967.64	1831.51	1431.85	1249.1	2229.56	3015.86	3006.66	2109.23	2056.31	1862.75	2679.58	2868.51	2458.17	3945.01	2361.5	2316.54	2198.24	2063.45	2031.77	5125.23	5661.42	3355.65	3660.88	3763.87	3666.33	3127.89	3761.98	3124.33	2923.16	5147.48	5055.04	4940.35	1756.59
MARK2	2164.37	2414.1	1995.64	2503.47	2818.67	2576.29	2150.39	2459.92	3078.1	2910.52	2516.21	2925.29	2864.06	3030.34	2232.4	2282.93	1853.79	2066.98	1541.02	1804.26	1730.59	1689.97	1647.96	1915.68	1932.25	2759.08	3198.63	2549.49	2704.92	2473.31	3136.64	2856.17	2584.11	1919.19	2099.94	1825.86	2064.92
HMMR	122.876	63.6579	124.094	127.634	121.72	163.64	194.256	156.138	74.2478	167.388	127.839	215.914	167.647	162.947	365.88	261.938	134.431	14.7876	139.42	110.58	204.782	135.198	193.363	43.2174	39.3925	1238.42	1231.88	1202.13	897.214	465.182	829.48	966.68	1071.42	22.5492	25.3239	44.4761	88.3817
CHFR	1094.47	1009.71	1126.13	1183.75	1224.24	1380.45	1440.21	2390.42	1039.47	1099.56	837.096	1559	1839.42	1682.22	1509.47	1654.28	1130.8	676.944	903.145	895.923	1183.27	1224.38	1391.44	527.429	581.798	1873.67	1777.1	1749.82	1727.28	1500.15	1674.95	1640.38	1770.67	524.895	532.776	574.678	793.427
TRHDE	121.998	427.977	178.966	191.034	166.988	95.4568	97.128	114.837	167.588	187.589	282.72	179.929	141.855	182.875	206.802	201.401	412.33	453.487	508.327	523.562	450.52	370.948	349.802	942.846	957.542	388.394	360.32	274.722	254.555	328.084	255.166	417.129	426.455	676.476	696.408	753.752	938.051
P4HA2	5529.4	625.806	6706.15	4470.54	3893.02	3443.79	4281.99	2673.48	3531.01	5085.12	7246.23	3817.97	3297.83	3482.84	5647.27	7308.65	3085.13	805.104	6842.68	5189.36	3787.34	3029.27	2858.66	2492.5	2619.1	2257.95	1945.41	2243.27	2240.08	1855.97	1722.94	2928.18	2634.86	2253.67	1957.73	1999.08	2926.64
FCGR2B	463.417	30.3599	669.433	734.94	851.033	807.712	897.129	4944.02	927.037	731.599	602.316	1606.59	1811.29	2336.35	2644.23	2293.41	239.491	14.7876	479.95	282.092	153.4	121.678	230.287	55.5653	95.9562	1432.61	555.493	576.567	471.48	302.725	296.297	741.563	904.367	13.7801	5.84398	5.85211	63.2733
NFATC3	661.773	270.301	794.371	692.395	636.766	628.337	628.721	817.959	542.009	577.198	857.993	660.513	560.385	587.312	788.32	692.68	370.532	377.906	330.659	373.489	389.458	380.243	350.774	639.442	586.848	463.275	395.088	418.208	454.51	397.029	319.909	432.854	386.277	610.081	690.564	599.256	472.039
TRNT1	334.397	788.378	331.762	273.621	263.559	308.399	364.491	533.89	240.775	190.475	195.445	260.026	320.053	269.624	219.174	329.46	376.181	578.36	360.271	319.328	384.245	392.073	385.754	697.653	703.005	389.216	421.954	319.343	366.707	240.912	311.531	324.434	343.279	734.102	810.366	752.582	338.462
ACADVL	16890.1	25248.7	15784.4	18401.9	20821.1	22372.6	19207.3	15654	18683.9	14923.5	11667.7	11524.7	15131.6	14601.9	14117.3	14385.6	10676.5	15919.7	8476.23	10536.7	13929.6	17565.5	15471	15567.1	16164.1	11862.5	13065.6	13010.8	11598.1	13289	14298.4	11982.5	12096.5	18718.3	18063.7	17817.3	24886.5
STK10	1172.58	713.947	1174.25	1448.19	1290.63	1623.82	1668.93	4756.65	1585.72	1275.61	1339.85	2133.61	2165.34	1941.29	3241.66	2364.43	2165.58	713.092	1727.33	1392.4	2082.82	1819.25	2087.15	667.665	667.653	2861.11	2131.1	1991.3	2228.28	1717.29	1675.72	2288.42	2094.21	663.949	631.15	701.083	2207.53
FBXW11	2065.19	1636.5	2994.3	2314.1	2272.44	1339.54	1335.77	1790.04	2054.54	2487.72	3648.31	1520.69	1385.72	1451.28	1702.14	1449.39	1652.71	1996.33	2310.92	2049.11	1804.31	1587.73	1642.13	2673.31	2702.93	1551.11	1295.1	1714.83	1653.5	1786.23	1487.58	1479.81	1617	2788.59	3088.54	3016.18	2049.85
ACAP1	1212.96	511.222	1018.92	1527.44	1864.02	2673.84	2953.53	3102.6	1561.33	1356.42	624.442	1691.33	3016.47	1751.38	1505.94	1371.39	785.122	561.929	787.167	876.741	1251.77	1008.07	1287.47	263.715	261.607	959.464	1324.33	1091.89	1650.55	1295.69	1452.54	1280.35	1046.75	266.832	251.291	262.175	674.915
CRMP1	605.601	699.257	604.431	288.637	342.023	387.072	559.791	231.688	258.807	277.055	291.324	52.2374	94.9607	37.5129	76.004	51.2234	891.311	244.817	1196.79	1237.82	863.062	1022.43	888.109	470.1	435.338	359.593	388.766	332.467	388.104	427.935	437.21	349.263	407.423	425.929	402.261	385.069	651.815
EVC	1856.3	2888.11	2089.34	881.761	904.348	947.226	1220.89	592.315	728.689	972.579	1144.4	222.879	218.058	153.569	330.529	268.923	1022.35	2551.69	1163.48	1402.56	1075.29	1140.73	943.495	4181.51	4413.99	2689.13	1867.18	1707.83	1743.52	2396.44	1793.78	1986.33	1970.86	3600.36	3973.91	3611.92	2513.86
DERL2	1064.63	1541.5	1051	1196.26	1291.64	1184.29	1081.99	1193.7	1317.37	1479.07	1509.48	1435.95	1413.86	1436.04	1553.66	1852.19	2173.49	1823.81	2141.88	2035.57	1883.25	1826.86	1700.43	1762.21	1776.7	2291.69	2289.93	2326.39	2392.82	2103.22	2211.18	2077.37	2082.93	1559.65	1547.68	1732.23	1603.93
SIDT1	113.221	230.148	162.082	125.132	165.982	187.767	195.3	417.038	117.736	157.287	95.8789	244.935	227.437	175.842	231.547	182.774	168.321	108.443	99.9381	92.5261	138.507	66.7538	122.431	90.8448	96.9663	106.15	151.714	99.74	176.344	161.665	131.772	126.628	106.438	175.383	147.074	165.03	60.2603
NDE1	540.653	315.351	540.274	549.745	521.082	566.447	638.121	800.834	558.98	552.667	711.716	684.89	615.486	636.547	894.372	671.725	606.634	387.764	557.679	506.637	580.835	508.681	551.91	288.41	265.647	1024.47	768.05	779.547	725.297	668.055	720.558	768.875	804.273	321.953	289.277	265.686	505.182
MRVI1	717.067	690.443	574.885	941.825	644.813	871.699	1540.47	656.785	551.555	450.215	556.835	263.509	464.252	385.68	247.455	249.132	1697.9	1478.76	1084.51	1012.14	1572.72	2579.74	1958.89	1404.13	1172.69	321.741	478.846	375.337	471.48	527.787	399.887	234.221	222.743	1223.92	981.789	1135.31	1820.86
TMEM38A	150.962	675.753	151.108	244.424	179.059	130.073	83.551	83.6091	178.195	314.573	229.863	261.187	213.368	263.763	197.964	146.685	137.82	1079.5	74.0282	152.329	126.592	132.663	106.884	566.237	588.868	99.567	70.3256	86.6163	81.9003	296.385	125.679	91.8677	83.8812	730.344	792.834	856.749	174.755
AP1M1	3807.39	1371.09	3773.47	4200.25	4589.14	3939.95	3184.34	2642.25	4418.81	5704.16	5568.35	4350.79	4068.07	4064.29	3982.25	4108.35	2174.62	1717.01	2070.32	2186.77	2025.48	2076.97	1877.27	3518.25	3403.92	4023	4214.8	4364.06	4313.41	3268.16	5024.86	3356.07	3267.84	3457.54	3241.46	3178.87	2828.22
PVR	1911.59	1688.4	2111.29	1461.54	1490.82	1754.94	1640.73	1609.73	1750.13	1809.52	2399.43	3000.75	3129.01	2747.82	4447.12	5342.37	1404.18	1928.96	2410.85	1655.31	1058.91	966.662	794.829	1552.3	1422.17	15916.7	13999.5	15081.7	12546.2	10215	13641.1	11612.6	12122.6	1279.04	1258.4	1383.44	1242.37
IKBKG	134.286	138.089	179.81	137.645	125.744	147.906	131.593	262.915	115.614	105.339	153.652	94.0273	128.959	127.778	197.964	135.043	105.06	106.799	123.38	120.735	163.081	137.732	126.318	134.062	148.48	235.34	244.954	212.604	258.982	212.383	199.563	180.425	241.775	120.262	128.568	149.814	140.607
XRCC1	939.121	741.369	828.983	932.648	964.705	922.05	754.047	713.196	1093.56	1056.27	1154.23	1093.5	906.23	924.928	866.092	949.961	1310.42	839.608	1471.93	1364.2	1184.01	1155.94	1157.26	919.914	855.525	1851.45	2099.5	2064.79	2083.66	2203.08	2541	2009.5	1903.89	922.012	953.543	876.647	1232.32
SCARB1	7894.76	270.301	7393.31	10088.1	10398.5	8544.96	6173.37	9219.17	11598.6	10639.2	12814.6	22967	21381.4	21528.9	24632.4	30675.8	7218.61	279.322	6454.03	10360.7	7762.34	8300.28	7630.55	704.709	694.925	3780.25	4352.29	4603.79	4252.17	3913.23	4143.59	4463.45	3664.69	474.786	419.793	442.42	11164.2
CYP2W1	10.5322	18.6077	5.90924	2.50263	8.04759	2.09795	15.6658	9.06605	8.48547	10.101	4.91687	10.4475	4.68942	7.03367	7.07014	3.4925	9.03738	9.85841	7.40282	30.4659	11.9146	11.8298	15.5468	7.05591	4.04026	32.9147	25.2856	15.7484	18.446	17.4344	35.0377	20.6909	23.9661	3.7582	4.86999	3.51127	5.02169
MCM2	444.108	324.165	508.195	650.685	618.659	624.141	586.946	585.264	595.043	647.905	883.807	918.217	841.75	709.229	1405.19	1280.58	297.104	366.404	380.012	330.611	340.31	306.729	327.454	396.895	444.429	2861.93	3078.52	2466.38	2425.28	1506.49	2490.72	2670.78	2644.73	384.589	413.949	404.966	484.091
MOV10L1	8.77683	18.6077	13.5068	10.0105	13.0773	46.155	68.9295	14.1027	18.0316	18.7589	1.22922	12.7691	37.5153	15.2396	8.83767	11.6417	40.6682	14.7876	8.63663	4.51347	43.1903	81.1185	69.9605	14.9938	19.1912	26.3318	28.4463	22.7477	16.9703	7.13226	10.6636	13.2422	16.2123	13.7801	14.61	16.3859	37.1605
PANX2	1449.06	224.272	1574.39	2031.3	2628.55	2058.09	1463.19	806.878	3018.7	3346.31	3452.87	1640.25	1808.94	1836.96	1831.17	1740.43	15.8154	371.334	30.8451	14.6688	10.4253	16.0547	27.2069	209.031	206.053	1175.88	1112.57	594.94	580.68	412.878	1061.79	1219.11	1263.15	457.248	450.961	443.59	95.4121
SELO	2271.44	1538.56	1829.33	2017.12	2431.38	2235.37	1878.85	1987.48	1920.9	2171.71	1379.18	1442.91	2138.37	1858.06	1495.33	1553	1329.62	1539.56	1096.85	1320.19	1262.2	1779.54	1552.73	1526.72	1499.95	851.668	950.581	916.033	906.806	1037.35	1036.66	810.256	766.914	2455.36	2338.57	2281.15	2128.19
TP63	3.51073	7.83481	0.844178	0.834211	3.01785	9.44079	7.31071	24.1761	3.18205	0	2.45843	12.7691	16.413	9.37823	1.76753	2.32834	16.9451	18.0738	18.5071	19.1822	18.6165	21.1246	8.74506	22.0497	14.1409	78.1724	75.0667	40.246	56.8137	35.6613	38.0845	36.416	26.7856	23.8019	18.5059	28.0901	6.02603
ALPK1	2346.93	813.841	1996.48	1902	2031.01	1999.35	2031.33	2402.5	1888.02	1610.38	1278.39	1240.93	1406.82	1445.42	1355.7	993.035	1064.15	575.074	1512.64	1514.27	1054.44	1003.84	1217.51	581.23	563.616	1072.2	1294.31	1341.24	1385.66	1029.42	1153.96	1285.32	1258.22	461.006	485.051	461.147	730.154
LLGL2	2164.37	11107.8	1615.76	2148.09	2448.48	1667.87	1120.63	1125.2	2417.3	2043.28	1574.63	1475.42	1410.34	1429.01	1085.27	918.529	2797.07	7268.94	1437.38	2560.26	2513.97	3185.59	2653.64	6542.59	6382.6	1503.38	1744.71	1895.06	1916.91	3609.71	2799.97	1597.34	1524.66	6466.61	6894.93	6803.67	4422.1
PDE8A	3165.8	1838.24	2702.21	1932.87	1811.71	1623.82	1789.04	1753.78	1610.12	1529.58	1554.96	1278.07	1377.52	1546.24	1323.88	1259.63	2270.64	1746.58	1580.5	1884.37	2400.79	2551.85	2827.57	2716.52	2690.81	534.041	626.609	1375.36	1334.75	1827.44	1153.96	747.356	667.525	3512.67	3482.04	3531.17	2142.25
CLCN4	697.758	258.549	959.83	829.206	645.819	476.235	370.757	385.811	738.236	772.003	1596.75	660.513	620.175	576.761	608.032	612.352	834.828	415.696	412.091	433.293	832.531	820.48	607.296	578.584	672.703	668.169	558.654	720.928	621.999	816.247	636.011	568.586	637.215	415.908	522.062	523.179	507.191
NLE1	737.254	293.805	649.173	846.724	966.717	729.038	466.841	434.163	923.855	1370.85	1250.11	708.107	690.517	672.888	756.505	718.292	532.076	382.835	1042.56	899.308	549.56	462.207	462.516	520.373	553.516	1049.16	906.331	1021.9	1007.89	811.492	994.004	965.852	985.428	610.081	557.126	463.487	698.015
SDHA	5071.25	9796.45	5623.07	5953.77	5663.49	4429.83	4360.32	4028.35	5221.74	6069.24	8501.26	5948.1	5082.15	4619.95	6444.43	5979.17	8925.54	10422	9502.76	10488.2	11666.6	8166.78	7371.11	17489.8	18266	3494.72	3525.76	5511.07	5253.42	5622.6	4586.89	2662.51	2603.14	15780.7	15414.5	14143.4	7369.83
SMARCE1	1162.93	1868.6	1166.65	1101.99	1022.04	1179.05	1205.22	1150.38	1106.29	1125.54	1637.32	1454.52	1252.07	1244.96	1474.12	1785.83	1817.64	2132.7	1595.31	1510.88	1548.89	1670.53	1633.38	1885.69	1922.15	2042.36	1973.07	2131.29	2050.46	2243.49	1997.15	1681.76	1576.83	1948	1985.01	1920.66	1848.99
FNDC8	1.75537	0	0	1.66842	0	2.09795	0	1.00734	0	1.443	0	4.64332	1.17235	0	1.76753	3.4925	3.38902	9.85841	7.40282	6.7702	0	0	1.94335	0.881988	0	1.64574	1.58035	0	2.95136	0	1.52338	1.65527	3.52442	2.50547	1.94799	4.68169	1.00434
GSDMB	1497.33	333.959	992.753	1046.94	1371.11	1401.43	1413.06	1401.21	866.578	1017.31	259.365	915.895	1412.69	1440.73	616.869	649.606	247.398	179.094	220.851	314.814	366.373	439.392	537.335	68.7951	46.463	197.488	328.713	196.855	259.72	240.912	352.662	351.746	320.722	60.1312	62.3358	74.907	306.323
KDM5A	5244.16	6349.14	3932.18	4842.6	5637.34	5091.73	4767.63	3787.59	6898.68	5851.35	4471.89	5100.69	4310.75	4419.49	3538.6	3959.34	3488.43	6281.45	2930.28	2970.99	2556.42	2999.7	2914.05	2813.54	2581.73	3164.75	3841.04	3029.82	3308.48	3355.33	3508.34	3250.96	2512.21	2441.58	2708.69	2605.36	3836.57
ADAM11	41.2511	33.298	32.0788	32.5342	53.3153	59.7916	62.6632	46.3376	51.9735	40.4039	6.14608	34.8249	29.3089	65.6476	19.4429	32.5967	30.5011	49.2921	29.6113	44.0063	32.0204	38.8693	48.5837	10.5839	8.08052	79.8182	77.4372	80.4919	72.3083	84.0021	89.8793	79.4531	97.274	23.8019	32.1419	24.5789	59.2559
PPP2R3A	3284.29	2683.42	4890.32	3413.59	3094.3	2422.09	2267.36	2373.29	3332.67	3177.48	6031.76	4863.88	3398.65	4206.14	5691.46	4594.97	2127.17	2065.34	2745.21	2666.33	1999.41	1877.56	1812.17	3267.77	3195.85	504.418	423.534	529.322	526.08	866.173	494.336	452.717	692.901	2895.07	3342.76	3009.16	2163.34
FERMT2	1467.49	2487.55	1230.81	1338.07	949.616	1324.86	1843.34	914.664	928.098	849.925	1481.21	777.756	762.03	684.611	876.697	1218.88	3187.93	4631.81	2945.09	2642.63	2780.56	3241.36	3193.89	4494.61	4374.59	698.615	476.476	631.687	918.611	893.91	621.538	520.584	507.517	4726.56	4836.87	4906.41	3261.08
ABCB11	0	0	0	0.834211	0	0	1.04439	3.02202	0	0	0	0	2.34471	1.17228	0	1.16417	0	0	1.2338	1.12837	0.744661	2.53495	0.971673	0	0	6.58294	0	2.62474	10.3298	1.58495	1.52338	1.65527	0	1.25273	0	0	0
DHRS9	3.51073	2.93805	33.7671	9.17632	15.0892	23.0775	42.8199	261.908	10.6068	17.3159	15.9798	96.3489	92.616	78.5427	90.1442	88.4768	12.4264	3.28614	44.4169	21.439	16.3825	8.44985	19.4335	8.81988	12.1208	167.042	105.884	46.3703	50.911	42.7935	42.6546	105.11	78.947	11.2746	2.92199	4.68169	23.0998
CD5L	0	0	1.68836	0.834211	1.00595	0	1.04439	18.1321	1.06068	0	1.22922	1.16083	2.34471	3.51684	14.1403	12.8058	54.2243	1.64307	9.87043	4.51347	338.076	20.2796	53.442	1.76398	1.01007	3.29147	8.69193	13.9986	18.446	3.16989	4.57014	3.31055	4.22931	0	0	0	50.2169
PTGS2	740.765	154.738	198.382	117.624	102.607	178.326	455.353	2168.8	63.641	89.4657	70.0653	335.48	347.017	819.423	684.036	534.353	155.895	73.9381	632.941	292.247	157.123	119.143	177.816	114.658	102.017	1028.58	286.043	623.812	458.937	118.871	160.716	377.402	197.368	126.526	80.8418	120.554	14.0607
IGF2BP2	1403.42	895.127	1107.56	1247.15	1124.65	1042.68	998.434	929.774	1036.29	916.302	1135.8	1227	1076.22	1321.16	1461.75	1752.07	22.5934	1028.56	130.783	56.4183	30.5311	29.5745	26.2352	829.069	813.103	2215.98	1020.12	419.083	481.81	458.049	1045.04	2144.41	2296.51	835.573	894.129	923.463	50.2169
MAP3K13	2647.97	2802.9	2330.77	2484.28	2496.77	2124.18	2053.27	2057.99	3027.19	2366.51	2617	3179.51	2608.49	3051.44	3344.17	2954.66	2046.97	2668.34	2194.94	2075.07	1698.57	1678.98	1693.63	2254.36	2201.94	1593.07	1826.1	1559.09	1573.81	1696.68	2028.38	2084.82	2161.18	2183.51	2327.85	2433.31	2494.77
ST6GAL1	10676.1	25219.3	13857.2	16006.8	17323.5	10194	5407.84	9692.61	14312.9	21109.6	30423.1	15493.6	14257	15091.9	14781.9	9772.03	1300.25	12249.1	1120.29	801.14	1117.74	1004.69	1270.95	9394.94	9611.78	2935.99	2886.51	2581.87	3810.21	4139.88	3447.41	3013.43	3666.1	6922.61	7245.56	7384.2	1367.91
TBX21	68.4593	17.6283	38.8322	37.5395	60.357	79.7222	84.5954	193.409	91.2188	40.4039	38.1057	103.314	135.993	70.3367	114.89	65.1934	116.356	18.0738	56.755	58.6751	154.145	135.198	176.845	10.5839	19.1912	65.8294	95.6112	90.1159	112.89	108.569	106.636	71.1768	74.7177	16.2855	19.4799	42.1352	152.659
VDAC1P1	10.5322	9.79352	29.5462	5.83948	6.0357	2.09795	7.31071	14.1027	2.12137	1.443	18.4382	6.96498	1.17235	5.86139	19.4429	13.97	11.2967	16.4307	7.40282	9.02693	8.93593	3.37994	4.85837	14.1118	13.1308	6.58294	5.53123	16.6233	8.11624	2.37742	7.61689	4.96582	7.75373	13.7801	15.584	15.2155	21.0911
FRY	637.198	1331.92	465.142	650.685	358.118	617.847	1148.83	574.183	416.849	266.954	428.997	253.061	248.539	268.452	213.872	167.64	1727.27	3499.74	1471.93	1245.72	1369.43	1864.88	1672.25	2451.93	1986.8	185.968	189.642	237.976	395.482	463.597	241.455	177.114	151.55	2502.96	2754.46	2848.81	1624.01
PICALM	10377.7	8010.12	11424.3	10178.2	9400.6	8571.18	9074.68	13065.2	9272.49	9266.92	12011.9	10641.3	9487.86	10343	11734.7	10951.3	9929.82	10081.9	8851.31	8307.03	8985.82	9351.44	9487.42	12051.5	11887.5	9033.44	9361.21	9589.04	9396.39	9659.45	8007.64	7576.19	8435.35	12823	12480.8	12561	10028.3
NSF	834.677	893.169	1142.17	950.167	1099.5	863.307	781.202	1479.78	946.129	1073.59	1569.71	1267.63	1255.59	1119.53	1445.84	1356.26	931.98	926.691	1137.57	880.126	833.275	734.292	807.461	1091.9	1246.42	1206.32	1119.68	1143.51	1213.75	1110.25	1104.45	1152.9	1260.33	1257.74	1310.03	1230.11	739.193
GLI2	119.365	54.8437	83.5736	135.142	70.4164	156.297	228.721	59.433	61.5196	23.0879	23.3551	15.0908	45.7218	9.37823	5.3026	10.4775	253.047	57.5074	82.6649	138.789	304.566	374.328	334.256	25.5777	29.2919	17.2802	31.607	34.1216	64.1921	63.3978	57.1267	19.0356	10.5733	23.8019	13.636	10.5338	91.3947
CLASP1	5173.07	2085.04	5005.97	4041.75	3801.48	3574.91	3188.51	2767.16	3222.36	3519.47	3903.99	2809.21	2671.79	3234.32	2767.96	2561.17	2467.2	1886.24	2340.53	2330.08	2549.72	2524.81	2440.84	2508.38	2154.47	2216.81	2240.15	2511.87	2609	2511.35	2645.35	2421.67	2374.05	1980.57	2376.55	2165.28	2752.89
MRPS34	5189.74	2649.15	5170.59	6395.9	7239.82	5447.33	3753.53	3170.1	7946.64	10640.7	9120.79	4796.55	5041.12	4658.64	5793.98	6000.12	2390.39	3092.26	2030.84	1971.26	2071.65	1929.1	1821.89	3623.21	3597.85	5207.11	4707.07	4856.64	4615.19	3999.61	4823.78	4299.57	4116.52	4147.8	4132.67	4037.96	3928.97
NOTCH3	5333.68	2833.26	3234.89	5952.93	4405.05	6962.06	8942.04	2051.95	3685.87	2600.28	4266.61	2111.55	3003.57	2869.74	1166.57	2149.05	21387	3770.84	11225.1	11160.7	13982.5	18385.2	15950	4240.6	4024.1	943.829	2692.13	2653.61	5278.51	2875.09	3154.92	1567.54	911.415	3512.67	3380.74	2691.97	9472.91
CLNS1A	1758.88	1445.52	1901.09	2057.16	2047.11	1956.34	2066.84	2130.52	2045	2555.55	2902.18	2543.38	2288.44	2254.29	3050.76	3069.91	2200.6	1720.29	3520.04	3057.87	2295.04	1775.31	2056.06	2173.22	2318.1	3575.36	2718.2	2811.97	2547.02	2768.9	2315.54	2911.63	3174.8	2231.12	2246.04	2242.53	1740.52
PPP2R2C	27.2082	13.7109	57.4041	169.345	173.023	207.697	224.543	114.837	266.231	111.111	201.591	125.37	118.408	155.913	231.547	289.878	6.77803	36.1475	12.338	9.02693	11.9146	8.44985	12.6318	10.5839	5.05033	613.859	653.475	568.693	479.596	366.123	500.43	633.142	539.237	13.7801	15.584	14.0451	4.01735
TEAD2	190.457	666.938	183.187	310.327	208.231	488.823	597.389	162.182	398.817	157.287	231.093	390.039	468.942	317.688	286.341	402.802	807.716	755.812	731.646	537.102	523.497	745.276	821.064	566.237	606.039	565.31	510.453	491.701	667.745	618.129	540.799	544.585	435.619	590.038	529.854	656.607	621.685
EED	509.056	588.59	493.844	498.024	517.058	579.035	654.831	744.423	493.218	430.013	518.729	625.688	594.383	568.555	574.449	672.889	589.689	502.779	669.956	669.121	746.895	703.027	804.545	456.87	443.419	495.366	599.743	510.949	595.437	472.314	489.004	490.789	591.398	502.346	497.713	524.349	544.351
CDHR2	7015.32	428.956	7605.2	5293.07	4404.05	1993.05	759.269	1762.84	4594.88	5121.19	5906.38	3217.82	1814.8	1119.53	2631.86	2146.73	1613.17	371.334	165.33	644.297	626.26	1087.5	827.866	2959.07	2709	23.8632	14.2232	23.6226	26.5622	44.3785	35.7994	25.6567	23.9661	1647.34	1617.81	1482.93	799.453
SNCB	0	0	0	0	1.00595	0	0	3.02202	0	1.443	0	3.48249	0	0	1.76753	3.4925	6.77803	0	6.16902	4.51347	1.48932	1.68997	0.971673	0.881988	1.01007	3.29147	5.53123	3.49965	4.42704	11.8871	9.14027	0.827637	0	0	0	3.51127	0
TSG101	1779.06	2262.3	2003.23	1836.1	1747.33	1633.26	1447.52	1608.72	1710.88	2086.57	2781.72	2191.65	1730.39	1754.9	2255.37	2415.65	2532.73	2854.01	2257.86	2228.52	2249.62	2072.75	1973.47	3027.87	3257.46	2319.66	2024.43	2270.4	2139	2342.55	2154.82	1969.78	2264.79	3207	3226.85	3339.22	2294.91
C17orf85	957.553	1088.06	903.27	801.677	735.349	958.764	1083.03	1459.63	660.806	577.198	435.143	593.184	658.863	620.135	728.224	545.995	1042.69	926.691	813.077	1012.14	1108.8	1199.88	1235.97	945.492	947.441	1244.18	1129.16	1107.64	1115.61	1162.56	1141.77	1178.55	1254.69	928.276	968.153	986.666	1266.47
ATP2A3	544.164	918.632	534.365	770.811	1576.32	2347.61	2034.47	2588.86	822.029	845.596	803.908	1691.33	2248.57	1196.9	1258.48	1274.76	1546.52	1480.4	763.725	549.515	1615.17	1673.07	1828.69	795.554	811.082	1759.29	2148.49	1435.73	2439.3	1837.75	2265.26	1969.78	1789.7	814.277	769.458	836.852	1602.92
CA12	45536.8	31358.8	47796.5	64124.2	62471.5	47202.9	42417.8	27233.4	58942.2	83011.2	100629	66796.5	50403	61755.6	80032.2	99089.3	20618.8	63074.1	23669.3	22875.4	30871.4	23423.8	21957.9	57131.7	51169.9	38437.8	37010.2	33095.3	29256.1	16219.5	28904.6	41004.4	31023.4	47253.1	58284	61719.9	17972.6
MGLL	14989.1	7517.5	15959.2	20673.4	22201.3	16924.2	13176	9808.46	22627.6	25956.6	30091.2	25909.7	21131.7	25036.4	21191	22260.1	11872.9	6023.49	12534.2	13444.5	13123.2	9941.24	9291.14	7880.57	7780.53	4139.85	3129.09	8771.87	8995.01	4623.29	5451.41	4073.63	3416.57	6913.84	7632.24	7769.27	13874.9
NTN4	1412.19	5912.35	1370.1	1408.15	800.736	564.349	906.528	469.42	1131.75	822.508	1961.83	654.708	403.29	576.761	307.551	293.37	3088.52	7921.23	2914.25	2579.45	2992.05	2747.04	2051.2	8124.88	8227.99	575.185	1607.22	1544.22	1533.97	2280.74	1559.94	301.26	465.929	9608.47	9520.82	8807.43	7855.93
BCS1L	1317.4	970.537	1045.09	1147.87	1102.52	1086.74	1099.74	899.554	1148.72	1075.03	892.411	792.847	946.09	1037.47	887.302	917.364	1009.93	814.962	926.587	1174.63	1097.63	1215.93	1295.24	821.131	816.133	1006.37	1236.62	1285.25	1218.91	580.883	1201.18	1189.31	1191.25	883.177	846.403	909.418	1444.24
NUAK1	907.525	513.18	816.32	954.338	541.201	608.406	859.531	656.785	728.689	506.492	694.507	891.518	797.201	607.24	551.471	501.756	1587.19	552.071	1130.16	1046	1017.21	980.182	932.806	471.864	525.234	1049.98	984.559	872.287	1063.97	1046.86	963.537	916.194	861.369	690.256	563.944	458.806	1389
DPP8	1759.76	1674.69	1865.63	1628.38	1507.92	1542	1786.95	1956.25	1628.15	1369.4	1675.42	1915.37	1786.67	1836.96	1831.17	1960.46	1964.5	2188.57	1689.08	1567.3	1729.85	1781.23	1819.94	2233.19	2161.54	2146.04	2264.64	2198.65	2206.88	2342.55	2209.66	2324.83	2441.01	1966.79	2136.95	2055.26	1577.81
SLC24A1	814.49	1043.01	799.436	771.645	744.402	720.647	819.844	871.348	729.75	701.296	902.245	1019.21	798.373	1040.98	935.026	959.274	607.764	980.912	695.865	876.741	667.961	610.924	552.882	844.063	853.505	915.029	1165.51	1192.51	1142.91	1363.85	1201.95	1218.28	1113.72	711.553	719.784	684.697	440.904
ZNF532	1673.74	1172.28	1648.68	1617.54	1412.35	1774.87	2112.8	1940.13	1481.77	1242.42	1663.13	1268.79	1239.18	1400.87	1170.11	1246.82	2924.72	1286.52	3942	3496.81	2696.42	2535.8	2824.65	1023.11	964.612	999.784	1012.21	1050.77	1187.92	1397.13	1237.74	920.332	922.694	964.605	923.349	962.087	2404.38
SCARF1	846.087	904.921	725.149	975.193	673.986	731.136	973.369	1569.43	817.787	425.684	705.57	633.813	751.479	885.07	913.815	612.352	2079.73	1063.07	1479.33	1205.1	1773.04	1941.77	1930.71	545.951	507.053	622.088	523.886	465.453	590.272	451.71	400.649	474.236	477.207	561.225	651.604	642.562	1953.44
LMAN1	5911.2	3694.11	7906.57	6998.2	6655.36	5658.18	4976.5	5338.9	6387.43	8330.41	14925.1	5690.39	4993.06	4981.01	8715.71	9415.79	6539.67	5124.73	9400.35	8532.71	6801.73	4831.62	4750.51	6748.98	6989.65	12684.5	10496.7	11709.8	10975.4	11119.2	9124.28	9255.46	9757.71	5955.5	6497.53	6309.75	8479.62
PTPLAD1	1246.31	4961.4	2082.59	1440.68	1068.32	1099.33	1266.84	1776.95	1068.11	1339.1	2405.58	2927.61	2465.46	2384.41	3830.25	4931.42	2458.17	6790.8	2166.56	2020.9	2259.3	1921.5	1854.92	6562.88	7036.11	4621.23	4119.18	4257.32	3979.17	4782.57	4116.17	4045.49	4430.9	6048.2	6370.91	6562.56	1699.34
IPCEF1	71.0923	675.753	48.9623	68.4053	73.4343	185.669	104.439	286.084	82.7333	80.8078	76.2114	185.733	193.438	154.741	153.775	154.834	141.209	718.021	129.549	103.81	205.526	147.027	240.003	409.243	413.117	245.215	316.07	260.724	393.269	315.404	295.535	283.879	217.809	392.106	389.599	470.51	86.373
ZZEF1	1923.88	1752.06	1761.8	1463.21	1526.02	1825.22	1864.23	3801.7	1523.14	1395.38	958.789	1399.96	1757.36	1467.69	1647.34	1593.75	2056	1559.27	1996.29	2212.73	2278.66	2068.52	2223.19	2469.57	2217.09	1793.85	1826.89	1885.44	1973.72	1962.16	2174.62	1824.94	2041.35	2053.23	2258.7	2011.96	1738.51
NOX3	0	0	0	0	0	1.04898	0	0	0	0	0	0	0	0	0	0	0	0	1.2338	0	0	0	0	0	0	2.4686	0	0.874912	0	0	0	2.48291	0	0	0	0	0
ENO1	96000.1	50745.1	112989	116020	105485	77041	64469	63321.3	106929	130676	190095	94578.7	84005	84706.5	148089	135637	28760.3	40127	49965.4	44295.2	36992.5	24243.5	24115	47974	49589.2	86418.4	82241.5	84522.6	76080.2	55818.6	71245.4	80886.6	81130.1	54660.5	52936.7	46195.4	85642.9
SLC12A1	45.6395	85566.9	5.90924	15.0158	17.1011	19.9305	33.4204	192.402	6.3641	10.101	2.45843	4.64332	12.8959	15.2396	70.7014	11.6417	6.77803	12339.4	18.5071	13.5404	2.97864	2.53495	2.91502	75791.9	106568	18.1031	20.5446	34.1216	16.2325	34.0763	22.089	27.312	17.6221	108703	115851	76525.7	20.0868
C19orf10	7416.42	1577.74	6972.06	9974.66	11129.8	7906.13	5652.22	6059.14	12197.9	16167.3	16771.4	10521.8	8934.51	9753.36	12968.4	14738.4	4483.67	1776.16	6499.68	5566.23	4294.46	3224.46	3363.93	1923.62	1916.09	7087.36	6459.68	6103.39	6321.81	5484.71	5971.64	7424.73	7121.45	1773.87	1724.95	1706.48	3546.32
ANO8	781.138	908.838	688.849	749.122	786.652	1167.51	1111.23	914.664	709.597	663.778	522.417	657.03	799.545	858.108	707.014	752.053	773.825	515.924	635.409	776.316	1050.72	1177.91	1077.59	588.286	654.522	752.924	971.126	1189.01	1172.43	1085.69	1173	815.222	710.523	595.048	606.8	523.179	943.073
TUBE1	745.153	629.723	795.215	523.885	479.838	505.607	633.943	526.838	396.696	272.726	293.783	244.935	259.09	262.59	281.038	274.744	809.975	486.348	975.939	1159.96	939.762	1091.72	1102.85	600.634	642.402	353.01	439.338	424.332	398.434	417.633	432.639	478.374	616.069	657.685	542.516	610.961	401.735
ARHGEF10L	5185.35	5912.35	5027.08	4517.25	4846.66	4423.53	3501.83	3944.74	5133.71	4258.28	4089.6	4124.43	4369.36	5186.16	3529.77	3541.4	2789.16	3829.99	2048.11	3244.05	3011.41	3626.67	3796.33	4090.66	4275.61	4298.66	4922	4627.41	4449.18	4916.5	6075.23	5647.79	5682.78	4478.52	4532.98	4242.78	4912.22
TXK	121.998	69.534	134.224	65.9027	86.5116	125.877	123.238	358.613	112.432	75.0358	45.481	47.594	86.7542	56.2694	109.587	58.2084	142.339	70.652	103.64	126.377	201.803	149.562	202.108	40.5715	62.624	136.596	83.7586	105.864	124.695	80.0398	89.1176	125.801	119.83	30.0656	57.4658	51.4986	74.321
WSCD2	0.877683	142.985	5.06507	0.834211	1.00595	12.5877	133.682	2.01468	2.12137	0	1.22922	2.32166	3.51706	2.34456	1.76753	3.4925	3.38902	180.738	6.16902	2.25673	3.7233	37.1793	16.5184	104.957	73.7348	2.4686	8.69193	6.9993	7.3784	13.472	5.33182	4.96582	0	83.9332	80.8418	78.4183	2.00868
KCNQ2	0	28.4012	0	0	2.0119	6.29386	0	0	1.06068	2.88599	0	1.16083	0	0	1.76753	4.65667	0	0	0	0	0.744661	1.68997	2.91502	1.76398	1.01007	0.822868	1.58035	0.874912	1.47568	0.792473	0.761689	5.79346	0	0	0	0	0
TACR2	22.8198	9.79352	20.2603	15.85	19.113	17.8326	29.2428	21.1541	12.7282	11.544	20.8967	18.5733	17.5853	5.86139	14.1403	23.2834	27.1121	24.646	44.4169	58.6751	36.4884	20.2796	27.2069	18.5218	20.2013	67.4752	41.0891	46.3703	43.5326	57.8505	43.4163	24.8291	51.4566	10.0219	10.714	9.36338	14.0607
ACTR6	598.58	708.071	582.483	526.387	501.969	487.774	523.238	650.741	508.067	559.882	812.512	863.658	737.411	683.438	1016.33	1038.44	713.953	998.986	1005.55	897.051	806.468	692.887	768.594	1078.67	1136.32	900.217	732.493	723.552	583.632	584.053	548.416	718.389	838.812	1042.27	1047.05	1157.55	802.466
TIPIN	105.322	142.985	108.055	98.4369	121.72	132.171	138.903	138.005	103.947	118.326	137.672	164.838	143.027	148.879	189.126	250.296	157.024	128.159	169.031	205.363	173.506	187.587	195.306	171.988	161.61	469.857	532.578	545.07	450.82	400.991	517.949	448.579	508.222	119.01	114.932	118.213	146.633
SRI	1919.49	2723.58	2100.31	2342.47	2113.5	2031.87	1963.45	1647	2222.13	2460.31	3342.24	2625.8	2153.61	2199.19	2914.66	3100.18	2966.52	3378.15	4119.67	3802.6	2984.6	2763.94	2578.82	2381.37	2691.82	5742.79	6504.72	7979.2	7038.26	6709.87	7261.18	5515.37	5581.27	2629.49	2700.89	2811.36	2264.78
EIF4G3	2233.7	2296.58	2597.54	2152.27	1985.74	2460.9	2402.09	3369.55	2197.74	1828.28	2609.63	2599.1	2633.11	2750.17	2843.96	2534.39	2280.81	1833.66	1797.65	1656.44	2098.45	2190.2	2231.93	2080.61	1965.59	2547.6	2172.98	2383.26	2579.49	2780.79	2227.18	2699.75	2839.27	2014.4	2065.85	1993.23	2019.72
NUP37	229.953	309.475	242.279	231.911	221.309	256.999	269.452	309.253	188.802	206.348	340.493	489.87	403.29	368.096	586.821	621.666	315.179	450.201	383.713	373.489	299.354	253.495	255.55	379.255	411.097	388.394	396.668	408.584	354.901	351.066	332.858	387.334	439.848	350.765	411.027	426.034	302.306
SEMA3A	4.38842	12.7316	0.844178	3.33685	2.0119	52.4488	74.1515	35.2569	10.6068	5.77198	11.0629	13.93	55.1006	11.7228	12.3727	3.4925	212.378	39.4336	244.293	245.984	203.292	285.605	303.162	36.1615	30.302	5560.12	5105.32	4751.65	3854.48	3897.38	4318.78	5234.8	5862.52	33.8238	21.4279	32.7718	17.0737
GTSE1	179.925	84.2242	108.899	129.303	130.773	300.007	300.783	201.468	125.161	139.971	159.798	340.123	287.227	324.721	431.278	428.414	147.987	13.1445	166.564	95.9112	205.526	171.532	263.323	19.4037	10.1007	1534.65	1408.88	1082.27	982.803	481.031	990.196	1300.22	1084.11	10.0219	6.81798	23.4085	107.464
SEMA3C	631.054	474.006	1040.03	1232.96	974.765	2464.05	3036.03	1317.6	1148.72	783.547	1864.72	1945.55	1656.54	1253.17	2188.21	4589.15	1374.81	1373.61	4715.6	2196.93	889.87	888.079	1651.84	988.709	780.78	3548.21	2906.27	2850.46	1947.16	1273.5	2026.09	2687.34	2887.21	894.452	1187.3	1617.52	233.006
TTC38	4754.41	2377.87	4649.73	4863.45	5224.9	3323.16	1932.12	2502.23	4472.9	7497.81	6135.02	2837.07	2758.55	2956.49	2854.57	2296.9	2274.03	2707.78	1394.2	1891.14	2146.11	2701.42	2599.23	10065.3	9682.49	2271.94	2190.37	2402.51	2409.05	2237.15	2682.67	2252.83	2128.05	9426.82	8788.38	8875.31	4122.81
ACAT1	2164.37	11273.3	2422.79	2075.52	1715.14	1356.33	1197.91	1233.99	1394.8	2290.03	3264.8	1451.04	1447.86	1443.08	1961.96	1539.03	3408.22	11177.8	2942.62	3283.55	3476.08	2834.92	2883.93	26552.3	28577.8	2501.52	2598.1	3225.8	2720.42	3054.98	2510.53	2824.72	3260.09	26100.7	24908	25081	6784.3
GRAMD4	8080.83	1487.64	7048.04	10506.9	11742.4	10372.3	7245.96	7198.44	10181.5	12265.5	12152	11148.6	10999	12674.7	9785.07	10254	3372.07	1160.01	3180.75	4622.92	4724.87	3758.49	3976.09	1162.46	1238.34	2886.62	2843.84	3012.32	2827.4	2434.48	3313.35	2992.73	2721.56	1143.75	1217.5	1134.14	1856.02
CELSR1	7137.32	2364.15	8548.99	7826.57	7545.62	8042.5	5912.28	3915.53	7536.15	7333.3	11070.3	6377.6	5520.62	5897.73	6888.08	8660.25	4724.29	1994.69	6735.34	7103.07	6062.28	5341.99	4730.11	4370.25	4156.42	6401.91	6252.66	6900.43	6495.21	6825.57	7025.06	6198.17	6727.42	3997.47	4071.31	3910.38	3317.33
WNT8B	13.1652	11.7522	16.8836	3.33685	7.04164	13.6367	19.8434	16.1174	7.42478	2.88599	3.68765	4.64332	3.51706	5.86139	12.3727	2.32834	6.77803	77.2242	12.338	7.89857	8.93593	13.5198	9.71673	56.4473	35.3523	1.64574	1.58035	0	2.95136	1.58495	0	5.79346	1.40977	48.8566	64.2838	45.6465	3.01301
ZNF638	4725.45	3639.27	3983.67	4246.14	4198.83	3759.53	4189.04	4298.31	3739.97	3689.74	3506.95	3520.8	3334.17	3556.69	3064.9	3095.52	4786.42	3742.91	4994.44	5013.33	5049.54	4938.09	4992.46	3475.03	3207.97	2475.19	2436.9	2469.88	2498.33	2832.3	2425.22	2288.42	2388.15	3250.84	3657.36	3501.9	4678.21
SLC25A40	753.93	678.691	955.609	766.64	633.748	655.61	743.604	986.185	557.919	620.488	883.807	704.624	633.071	669.371	798.925	721.784	745.584	796.888	862.429	897.051	754.341	703.872	735.557	834.361	902.998	1068.91	1069.9	1285.25	1020.43	1047.65	982.579	1275.39	1424.57	835.573	881.467	900.055	647.798
TIMM21	435.331	1146.82	536.897	458.816	420.487	413.297	400	475.464	413.666	339.104	582.649	456.206	475.976	398.575	500.212	579.756	893.571	921.761	1020.36	893.666	845.935	828.085	728.755	1713.7	1827.21	1277.09	1114.94	1241.5	1085.36	900.249	1061.03	889.71	849.386	1505.79	1572.03	1639.76	900.891
ADD2	196.601	14.6903	189.94	459.65	458.713	511.9	540.993	127.932	422.152	443	703.112	55.7199	60.9624	49.2357	97.2144	80.3276	35.0198	6.57227	56.755	25.9524	41.701	91.2583	83.5639	0.881988	2.02013	75.7038	47.4105	37.6212	45.0082	35.6613	35.7994	101.799	88.1105	6.26367	4.86999	7.02254	36.1562
FGF4	0	0	0	0	0	0	0	0	0	0	0	0	0	0	0	0	0	0	0	0	0	0	0	0	2.02013	0	0	0	0	0	0	0	0	0	0.973997	0	0
RASAL2	907.525	1640.41	947.167	931.814	686.057	993.38	1280.42	1285.36	764.753	595.957	726.467	926.343	803.062	845.213	851.952	946.469	1975.8	1079.5	1885.25	1442.05	1551.13	1838.69	1750.96	1032.81	1063.6	613.036	587.891	536.321	551.167	658.545	497.383	447.752	454.65	1069.83	1113.28	1097.86	1787.72
VPS9D1	1829.09	1698.2	1527.12	1797.73	2165.81	2575.24	2262.14	1903.87	2313.35	2199.13	1594.29	1967.61	2189.96	2151.13	1956.66	2115.29	917.294	1298.02	799.505	912.849	1099.86	1301.28	1232.08	920.796	942.391	887.051	950.581	823.292	872.127	882.815	958.967	978.267	938.201	924.517	939.907	925.804	963.16
ZNF37A	1155.03	1794.17	1145.55	1051.11	1171.93	1217.86	1225.07	1164.48	1139.17	1044.73	920.683	1174.76	1128.98	1307.09	1026.94	932.499	1579.28	1477.12	1615.05	1847.14	1663.57	1772.78	1612.98	1299.17	1183.8	1384.06	1531.36	1352.61	1469.04	1454.19	1466.25	1634.58	1663.53	1424.36	1558.4	1559	1909.25
MARK3	2541.77	3955.6	2118.04	2068.01	2344.87	2400.06	2708.1	3051.23	2076.82	1927.84	1597.98	2108.07	2460.77	2405.52	2018.52	2027.98	2053.74	2566.47	1654.53	1683.52	1819.21	2036.41	2167.8	2408.71	2257.5	1779.86	1939.09	1484.73	1574.55	1493.81	1558.42	1790.18	1693.84	2317.56	2476.87	2552.69	2465.65
SLC25A3	7804.36	15044.8	9667.52	7355.24	7956.05	6829.88	6367.63	8125.2	7264.62	10060.6	10130	11884.6	11097.5	9752.19	12349.8	14007.3	8385.56	15628.9	10987	9913.83	8480.2	7633.59	7949.26	22472.2	22792.1	12337.3	11261.6	12257.5	11507.4	12179.5	11729.3	11136.7	11893.5	21494.4	21309.1	21046.5	8626.26
FNDC3B	6569.46	1926.38	7759.68	6920.62	6094.04	6022.17	6957.71	7547.99	5220.68	5922.05	9800.54	8835.08	7467.9	8316.15	11846	12846.6	6076.51	2865.51	6813.07	5785.14	5231.24	4695.58	4779.66	2677.72	2617.08	6697.32	5329.73	5527.69	5799.42	4429.92	4905.28	6551.57	6874.03	2472.9	2865.5	2714.21	4318.65
FOSL2	12236.7	17030.9	10528.6	8284.55	7937.95	9611.77	13465.3	21437.2	7442.81	6930.71	9339.59	8958.13	9436.28	10031.2	16956	19308.9	7132.75	9358.92	16968.5	11906.5	5885.8	4794.44	6329.48	6509.07	6991.67	5184.07	4797.95	5586.31	5916.74	5520.37	5422.47	5447.51	5058.96	3706.84	3787.87	3531.17	5666.47
CACNG5	3.51073	0	0	5.83948	3.01785	1.04898	1.04439	0	1.06068	1.443	6.14608	0	2.34471	0	0	0	0	0	1.2338	0	0	0.844985	4.85837	2.64597	4.04026	2.4686	10.2723	5.24947	2.95136	7.92473	5.33182	4.96582	0.704884	5.01093	4.86999	3.51127	0
CACNG4	0	11.7522	0	1.66842	4.0238	0	0	3.02202	5.30342	0	0	0	4.68942	0	0	1.16417	1.12967	14.7876	4.93522	3.3851	2.97864	1.68997	0	4.40994	2.02013	0	0	0	0	0.792473	0	2.48291	0.704884	3.7582	1.94799	0	3.01301
FRYL	1848.4	1461.19	1845.37	1904.5	1614.55	1904.94	1966.58	2061.02	1904.99	1704.18	1547.58	1867.78	1738.6	1811.17	1463.52	1384.2	2612.93	1590.49	2280.07	2184.52	2318.87	2437.78	2695.42	1493.21	1409.04	1723.08	1672.8	1921.31	1934.62	1918.58	1639.92	1622.17	1533.12	1324.14	1407.43	1498.14	2175.4
TMEM131	2503.15	1926.38	3065.21	2409.2	2242.26	2116.83	2381.2	2978.7	1974.99	1961.03	3155.4	2808.05	2540.49	2635.28	3434.32	3491.34	2101.19	1616.78	2520.66	2577.19	2356.85	2080.35	2267.89	2154.7	2208	3544.91	3198.63	3680.76	3944.49	3005.06	3167.87	3358.55	3162.82	1756.33	2067.8	1968.65	2062.91
FSCN1	919.812	1232.02	660.147	890.938	548.242	2148.3	4082.51	1183.62	1317.37	594.514	1154.23	927.504	1029.33	886.243	947.398	890.588	5587.36	1740.01	5138.79	3040.95	3368.1	3357.97	3683.61	1087.49	1052.49	10997.6	12212.2	12207.6	12487.9	11391.8	15837.8	8773.78	8058.24	1139.99	1090.88	953.894	3911.9
ACTB	90045.9	90421.6	68505.9	73175.3	63472.4	77287.5	86461.7	105809	82125.5	73367.7	91644.2	120876	104806	107156	156591	146353	89240.7	85299.9	89635.9	70499.2	70415.9	76346.9	78972.7	71506.3	68590.5	182575	200585	168718	183241	138819	169119	160882	163332	63973.3	62774.1	58729.5	81816.4
MOCOS	546.797	257.569	690.537	434.624	449.659	646.169	888.773	323.356	464.579	467.531	620.754	401.647	430.254	382.163	524.958	416.772	213.508	343.401	535.471	327.226	206.271	167.307	236.117	217.851	189.892	1356.09	1694.14	1662.33	1627.68	1588.12	1314.68	1555.13	1505.63	126.526	189.929	230.573	26.1128
PLD1	938.243	593.487	919.31	948.498	656.885	577.986	608.878	1007.34	709.597	640.69	888.723	788.204	801.89	852.247	726.457	488.951	2235.62	501.136	1049.97	1087.75	1977.07	1725.46	1712.09	1694.3	1596.91	1047.51	796.497	984.276	942.96	813.87	877.466	983.233	1055.92	1684.93	1502.88	1489.95	1062.59
ATP12A	0	100.873	0	0	0	1.04898	1.04439	0	2.12137	0	1.22922	0	0	0	0	0	0	1017.06	0	0	0	0	0	528.311	548.465	1.64574	0	0	2.21352	0	0.761689	1.65527	1.40977	612.587	880.493	1090.83	4.01735
WDR62	129.897	94.0178	90.327	102.608	113.672	211.893	216.188	221.615	82.7333	72.1498	65.1485	152.069	180.543	229.767	219.174	206.058	128.783	29.5752	136.952	92.5261	170.527	146.182	171.986	58.2112	58.5838	984.973	1189.21	869.663	656.678	351.066	754.834	911.228	874.057	58.8785	53.5698	45.6465	109.473
DLG1	2700.63	2609.97	2784.1	2410.87	2249.3	1971.03	1931.07	1875.66	1999.39	2148.62	2791.55	2141.73	2282.57	2251.95	1767.53	1969.77	2044.71	2500.75	2336.82	2349.26	1987.5	2013.6	2058.98	3101.07	3153.42	1915.64	2289.14	2482.13	2510.87	2818.83	2518.91	2144.41	2211.93	3139.35	3231.72	3288.89	2256.75
RAB7A	6577.36	7630.13	8167.42	6870.56	5935.1	5580.55	5465.28	8998.56	6387.43	7313.1	11693.5	10835.2	8928.65	8878.84	12643.2	13523	9017.04	9825.55	8508.31	7786.86	8214.35	7069.14	7370.14	12079.7	12300.6	10959.8	9439.44	8341.41	9347.7	8545.24	9294.89	9692.45	10678.3	13138.7	13066.2	12743.6	9788.28
BCAP29	1632.49	1188.93	1844.53	1590.84	1267.5	1304.93	1502.87	1478.77	1452.08	1349.2	2371.16	1957.16	1665.92	1746.7	2159.93	2746.27	3662.4	1679.22	3272.05	2882.98	3171.51	2984.49	2846.03	1730.46	1651.46	953.704	590.261	563.443	647.086	448.54	469.201	574.38	532.188	1404.31	1433.72	1604.65	2280.85
SEC31B	1089.21	632.661	996.13	782.49	998.908	1086.74	1050.65	1413.3	851.729	496.391	136.443	314.585	616.658	566.211	454.256	305.012	384.089	368.047	276.372	578.852	652.323	783.301	806.489	207.267	214.134	208.186	272.611	300.095	273.001	339.971	432.639	268.154	371.474	170.372	145.126	193.12	394.705
SART3	1839.62	1304.5	1865.63	1826.92	1719.17	1941.65	2145.17	2094.26	1951.66	1756.13	2109.34	2277.55	2042.24	1999.91	2497.53	2628.69	1604.13	1468.9	2006.17	2172.11	1572.72	1511.68	1606.18	1711.94	1751.45	2567.35	2400.55	2548.62	2396.5	2123.04	2122.83	2170.89	2049.8	1649.85	1709.36	1679.56	2199.5
ARHGAP15	301.923	115.563	244.812	352.871	322.91	500.362	551.436	1068.79	421.091	333.332	280.261	713.911	641.278	621.308	692.873	525.04	614.542	105.156	479.95	381.388	627.004	579.659	869.648	141.118	180.802	341.49	425.905	330.717	439.753	461.219	383.891	295.466	336.935	63.8894	60.3878	49.1578	287.241
TUBA3D	361.606	18.6077	370.594	125.132	113.672	112.24	91.9061	63.4623	60.4589	281.384	130.297	16.2516	49.2389	32.8238	38.8858	10.4775	32.7605	9.85841	45.6508	32.7226	53.6156	59.1489	43.7253	6.17392	8.08052	22.2174	44.2498	432.207	654.464	259.139	170.618	45.52	45.1126	1.25273	3.89599	7.02254	1347.82
PAX2	11052.7	9303.84	10692.4	7035.74	8778.92	8777.83	5945.7	2673.48	9677.67	7274.14	4760.76	3598.57	2774.96	3169.84	2577.06	2174.67	5761.33	4479.01	2001.23	3794.7	6053.35	8921.35	8145.54	3086.96	3036.26	699.438	833.635	867.913	923.038	1573.06	1195.09	985.715	948.774	4334.46	4300.2	4165.53	11717.6
EXOSC7	455.518	1475.88	473.584	434.624	438.594	509.802	502.35	578.213	505.946	593.071	586.336	616.401	575.626	535.731	728.224	784.649	572.744	2374.23	767.426	792.113	627.004	579.659	554.825	1306.22	1309.04	497.012	546.801	575.692	537.885	604.657	537.753	417.129	435.619	1404.31	1498.01	1768.51	516.23
KIFAP3	1382.35	1436.71	1377.7	1423.16	1376.14	1154.92	1219.84	1007.34	1370.4	1486.29	2090.9	1589.18	1313.04	1471.21	1461.75	2023.32	2088.76	1666.07	2077.73	1772.66	1881.76	1953.6	1844.24	1864.52	1823.17	1604.59	1905.11	1991.3	2072.59	1913.82	1740.46	1877.08	2002.58	1861.56	1944.1	1912.47	1819.86
MKRN2	480.093	829.511	449.947	437.961	398.356	458.403	457.442	765.578	371.239	409.811	538.397	634.974	610.796	538.076	763.575	669.397	563.706	888.9	540.406	487.454	583.069	508.681	531.505	1173.93	1176.73	475.618	447.239	490.826	493.615	537.297	400.649	417.129	468.748	1302.84	1342.17	1316.73	757.271
MCM6	487.992	511.222	498.065	439.629	494.927	707.01	864.753	807.886	503.825	499.277	695.736	911.252	833.544	787.771	1235.51	1220.05	894.7	1179.72	1223.93	1047.12	971.038	808.65	982.362	744.398	654.522	3479.08	3693.28	3221.43	2997.11	1577.81	2773.31	2844.59	2616.53	702.784	732.446	790.035	685.963
REXO2	1350.75	1446.5	1372.63	951.001	954.646	937.785	1138.38	838.106	872.942	1044.73	1406.22	1014.57	963.675	964.785	1217.83	1442.4	1092.39	1100.86	1272.05	1168.99	865.296	980.182	999.852	1916.56	1767.61	694.5	729.332	845.165	914.184	829.719	739.6	703.491	730.965	1871.58	1794.1	1839.9	1481.4
RBM7	480.97	782.502	493.844	462.153	515.046	485.676	515.927	458.339	573.83	581.527	657.631	612.918	533.421	529.87	616.869	701.993	743.324	780.458	1674.27	1112.57	630.728	548.395	683.086	726.758	819.163	622.911	602.114	545.07	621.261	603.864	465.392	597.554	604.086	690.256	721.732	771.309	731.158
RBMS2	645.975	593.487	643.263	548.911	463.743	493.019	601.567	748.453	507.007	393.938	467.102	608.275	672.931	573.244	581.519	476.145	1090.13	652.298	908.08	921.875	1048.48	1014.83	858.959	561.827	541.395	507.709	430.646	416.458	391.055	497.673	362.564	462.649	501.173	547.445	558.1	527.861	1038.49
BAZ2A	7087.29	4955.52	6381.14	6189.85	6450.15	6922.19	6730.03	7226.65	6296.22	5580.06	4903.34	8377.71	7722.3	8603.35	6170.46	6654.38	4767.22	5427.06	4376.3	4933.22	4722.64	5080.89	4857.39	4231.78	3983.7	4824.47	5887.6	5064.87	5154.55	5140.77	5476.55	5613.03	4618.4	4033.8	4387.86	4140.96	6162.62
PTPN23	1697.44	1971.43	1608.16	1735.16	1861.01	1843.05	1658.49	2281.62	1758.61	1754.68	1639.77	2080.21	2230.99	2087.83	1682.69	1881.3	1273.14	2065.34	1227.64	1212.99	1289.01	1444.08	1396.29	2702.41	2631.22	1585.67	1827.68	1689.46	2035.7	1789.4	1937.74	1758.73	1650.84	3124.32	2987.25	2732.94	2288.89
MLH1	610.868	1071.41	659.303	699.903	672.98	733.234	835.51	1035.54	674.595	711.397	861.681	1114.4	1022.29	805.355	1219.6	1116.44	964.74	1263.52	1014.19	954.598	1010.5	917.653	987.22	1276.24	1380.76	1094.41	1022.49	950.155	963.619	913.721	851.569	832.603	855.025	1276.54	1299.31	1265.23	768.318
UNG	629.299	1064.56	595.99	729.101	843.991	724.843	685.118	550.007	799.755	998.553	980.915	1094.66	1046.91	881.554	1134.76	1179.3	1038.17	2086.7	985.809	983.936	985.931	988.632	961.957	2524.25	2530.21	2196.23	2011	1825.94	1937.57	1640.42	1852.43	1744.66	1728.38	2120.88	2340.51	2322.12	1543.67
FMO4	557.329	756.059	579.106	482.174	461.731	401.758	449.086	408.98	516.553	378.065	446.206	532.821	451.356	542.765	385.322	422.593	228.194	829.75	276.372	285.477	267.333	206.176	256.522	2130.88	2111.04	148.939	233.892	330.717	334.979	409.709	310.008	283.879	278.429	1469.46	1611.97	1481.76	325.405
KLHL20	729.355	511.222	806.19	623.99	620.671	649.316	690.34	722.262	654.442	548.338	741.217	694.177	676.448	711.573	719.386	785.813	873.237	762.384	895.742	788.728	815.404	876.249	877.421	753.218	652.502	533.218	497.811	468.078	547.477	649.035	483.673	567.759	529.368	732.849	696.408	797.058	736.18
RGS11	28.9635	96.9558	22.7928	22.5237	21.1249	48.2529	116.971	49.3596	8.48547	4.32899	4.91687	2.32166	18.7577	5.86139	3.53507	5.82084	25.9825	146.233	18.5071	18.0539	43.935	110.693	101.054	63.5032	54.5435	50.1949	37.9284	67.3682	43.5326	31.6989	22.8507	90.2124	85.9959	75.164	58.4398	51.4986	56.2429
SLC46A1	499.402	156.696	482.026	448.806	560.314	327.281	209.922	578.213	484.732	681.094	548.231	464.332	413.841	392.713	434.813	415.608	321.957	215.242	252.93	341.895	313.502	289.83	269.154	403.069	409.076	144.002	211.767	221.353	195.528	247.252	190.422	235.049	178.336	409.644	442.195	395.603	566.446
[truncated: 62,319 more rows]
