# Supplementary material for: Deconvolving metabolic intratumoral heterogeneity in clear cell renal carcinoma with hyperpolarized 13C-pyruvate MRI
Source: Research Square preprint supplement (doi:10.21203/rs.3.rs-7989219/v1), 2026-01-29
Supplement: Supplementary file 8 [file fe2e37b0a33811bdc313b0bc.xlsx]

## Sheet: Kpl
	Pearson correlations				Spearman correlations
	Corrected P-value	Slope	Intercept	r2	Corrected P-value	spearman_coef	KEGG ID
alanine	0.0552094	-14528.5	358.116	0.15367	0.0519485	-0.400045	C00041
arginine	0.148756	4703.07	79.1981	0.0675608	0.0634121	0.377981	C00062
asparagine	0.000259099	4370.54	6.09819	0.518082	0.00554563	0.601516	C00152
aspartate	0.00317709	19214.3	-5.32727	0.343451	0.0210833	0.475151	C00049
cystine	1	-3.51665	25.7437	2.23383e-07	1	-0.00468019	C00491
cysteine	0.497707	-222.201	16.1227	0.000697122	0.216385	0.166704	C00097
glycine	0.0214832	13779.3	157.308	0.218106	0.016407	0.498998	C00037
histidine	0.356341	626.978	57.3923	0.017019	0.318875	0.105862	C00135
isoleucine	0.000504643	2878.48	11.7133	0.459619	0.00924808	0.539114	C00407
leucine	0.0615484	7267.77	45.7026	0.144386	0.0158159	0.505684	C00123
lysine	0.369196	3313.63	192.057	0.0099895	0.244541	0.137286	C00047
methionine	0.000259099	8558.66	13.1055	0.512457	0.0144647	0.512816	C00073
phenylalanine	0.00033465	3689.55	15.3232	0.489314	0.00895345	0.553377	C00079
proline	0.000639563	9411.05	20.235	0.437038	0.0204433	0.482283	C00148
serine	0.00317709	5435.53	42.6235	0.338278	0.00917629	0.5458	C00716
threonine	0.00176331	4736.26	44.8542	0.381194	0.0105468	0.531314	C00188
tryptophan	0.000259099	1269.89	9.09409	0.510652	0.00501913	0.631158	C00078
tyrosine	0.00033465	3564.44	20.5301	0.486866	0.00554563	0.611768	C00082
valine	0.00124009	4317.11	43.7994	0.402948	0.0144647	0.514821	C00183
ATP	0.497707	-3976.71	809.958	0.000608024	1	0.00601739	C00002
ADP	0.154207	38115.6	215.292	0.0599296	0.0933287	0.309561	C00008
AMP	0.497707	-6339.67	477.777	0.0028231	1	-0.0109205	C00020
alpha.hydroybutyrate	0.132457	-10755.9	214.88	0.0837905	0.0488978	-0.412749	C05984
beta.hydroybutyrate	0.132457	-6197.45	146.833	0.0848278	0.0725059	-0.357032	C01089
gamma.hydroybutyrate	0.00396625	-2619.84	51.7617	0.320026	0.00583246	-0.580344	C01991
X2.aminobutyrate	0.126986	193.781	4.33555	0.0880545	0.119492	0.271674	C02356
X3.aminobutyrate	0.0905585	-1851.66	31.3069	0.113614	0.0204433	-0.480999	NA
GABA	0.0211739	-1552.76	28.2486	0.223841	0.0158159	-0.505461	C00334
dimethylglycine	0.331683	-35.7804	1.36662	0.0206632	0.150426	-0.235039	C01026
ethanolamine	0.108036	1088.71	15.7922	0.0982881	0.113455	0.288166	C00189
hypotaurine	0.351171	1995.57	46.2869	0.018001	0.518172	0.0519279	C00519
beta.alanine	0.303981	3412.33	70.0393	0.0242746	0.483496	-0.0646313	C00099
xanthine	0.369196	29.6094	1.83911	0.0113146	0.483496	0.0657456	C00385
X2.hydroxyphenylpuruvate	0.00351428	7.95015	-0.000230659	0.331153	0.113455	0.288072	C01179
homocitrulline	0.356341	-2.05151	0.107448	0.0160641	1	0.00178313	C02427
meso.erythritol	0.0895537	1659.32	6.8357	0.115545	0.0739234	0.353689	C00503
adipic.acid	0.0552094	6.36511	0.0419925	0.154385	0.0678994	0.367488	C06104
sorbitol	0.209242	-2280.9	52.9754	0.0449509	0.201424	-0.178293	C00794
taurine	0.150661	-2838.13	162.105	0.06383	0.119492	-0.279029	C00245
myo.inositol	0.00265276	4.9839e+07	-14732	0.356107	0.00645353	0.573881	C00137
xylonic.acid	0.209242	331.036	10.4775	0.0441137	0.229949	0.156675	NA
maltose	0.148756	-1574.76	37.0383	0.0663185	0.0634731	-0.375976	C00897
X5.deoxyribose	0.473996	104.417	6.61829	0.00375705	0.229949	0.158904	C00673
Creatine	0.00351428	30729.4	-54.1235	0.331145	0.00917629	0.547137	C00300
glucuronic.acid	0.00317709	519.873	0.261271	0.341429	0.176111	0.20058	C00191
hydroxyhypurate	0.455523	-3312.16	188.435	0.00472848	0.791571	0.0285269	NA
pyridoxal.5.p	0.0366763	-64.6473	1.19515	0.184554	0.0697354	-0.362533	C00018
threonate	0.497707	74.4593	17.1963	0.00115249	0.483496	0.065077	C01620
histamine	0.000504643	2147.65	-3.2597	0.460712	0.000145414	0.761757	C00388
phosphoserine	0.148756	-35.8622	1.27955	0.0712698	0.119492	-0.272788	C01005
glycerol.3.phosphate.1	0.176014	-9930.65	447.974	0.0524179	0.0429128	-0.425898	C00093
glycerol.3.phosphate.2	0.148756	-13447.1	326.988	0.0733905	0.161302	-0.223758	C00093
glycerol	0.356341	17.0599	0.530742	0.0150332	0.119492	0.277388	C00116
spermidine	0.425432	-365.965	23.4159	0.00565302	0.443964	-0.0728773	C00315
hydroxyproline	0.000519995	1684.49	-0.837301	0.452208	0.00554563	0.600179	C01015
urocanic.acid	0.0457323	-4.37291	0.0863576	0.167044	0.0519485	-0.402653	C00785
acetyl.glucosamine	0.0198927	544.335	2.10233	0.228671	0.0488978	0.414086	C03878
betaine	0.497707	717.914	54.7708	0.00201722	0.176111	0.196345	C00719
pyroglutamate	0.00103431	1424.14	3.43119	0.413059	0.000499152	0.720973	C01879
homocysteine	0.497707	5.59534	1.65196	0.000681668	1	0.00690963	NA
xanthosine	0.803083	2.42884	2.25434	5.35357e-05	0.483496	-0.0588367	C01762
aminoadipic.acid	0.163794	-471.636	12.8334	0.056352	0.129513	-0.259194	C00956
S..2.Succinyl.cysteine	0.839582	-1.31885	1.27242	1.53351e-05	0.244541	0.141424	NA
gluconic.acid	0.233841	1005.34	18.9331	0.0332566	0.156391	0.228884	C00257
phosphorylethanolamine	0.00394137	20739.4	76.4053	0.32216	0.00917629	0.546246	C00346
glyceric.acid	0.0211739	1081.18	1.77527	0.222222	0.00438758	0.643638	C00258
adenine	0.497707	15.7508	2.87753	0.000904328	0.791571	0.0245153	C00147
adenosine	0.0447022	309.384	2.88109	0.169748	0.0343128	0.442836	C00212
cytidine	0.0763194	10.2358	0.047153	0.127728	0.0697354	0.363687	C00475
cytosine	0.0854174	-101.927	2.1132	0.119281	0.0519485	-0.404503	C00380
Guanine	0.00176331	72.5043	-0.27767	0.382351	0.0673104	0.370041	C00242
Guanosine	0.00277937	740.755	1.1683	0.35185	0.0804394	0.34366	C00387
Thymine	0.497707	-4.7112	0.587484	0.00124605	0.167356	-0.213506	C00178
Uracil	0.0808093	914.987	7.44704	0.123449	0.167356	0.209272	C00106
Uridine	0.00317709	249.166	0.516968	0.343795	0.144491	0.245376	C00299
trimethyl.lysine	0.0439927	-38.0847	0.716375	0.172118	0.0158159	-0.506575	C03793
assymetric.dimethylarginine	0.0291472	48.1341	0.425367	0.197841	0.0889521	0.329174	C03626
alpha.acetyl.lysine	0.108036	-300.953	5.30365	0.0976831	0.0519485	-0.401918	C12989
acetyl.asparagine	0.0194978	-537.775	8.38154	0.234638	0.00554563	-0.588367	NA
acetyl.glycine	0.455523	-4.55914	0.449745	0.00456614	0.725089	-0.0369999	NA
epsilon.acetyl.lysine	0.0211739	12.1543	0.104072	0.223831	0.0177527	0.493202	C02727
acetyl.aspartate	0.000438705	1336.91	-4.26758	0.470029	0.00895345	0.551149	C01042
acetyl.cysteine	0.338386	44.3284	0.300634	0.0194881	0.144491	0.243324	C06809
hippurate	0.0557587	-433.149	5.98745	0.150892	0.00669947	-0.568309	C01586
CTP	0.369196	353.9	13.3709	0.00935311	0.791571	0.0205037	C00063
cdp	0.369196	-4720.06	309.071	0.00915823	0.176111	-0.198128	C00112
CMP	0.150661	-503.009	11.8062	0.0644304	0.0889521	-0.3343	C00055
UTP	0.473996	1383.85	94.9355	0.00344177	0.725089	0.0372187	C00075
UDP	0.356341	1958.02	81.1284	0.0127576	0.374593	0.0853578	C00015
UMP	0.245824	-1359.54	53.0505	0.0308396	0.132111	-0.255182	C00105
GTP	0.224888	-3665.42	109.116	0.0393021	0.318875	-0.105639	C00044
GDP	0.0940748	-2366.69	58.2399	0.109835	0.0933287	-0.311122	C00035
GMP	0.356341	-781.034	42.4154	0.0150044	0.318875	-0.107644	C00144
ITP	0.356341	-25.5969	0.508855	0.0144731	0.0940954	-0.305007	C00081
IDP	0.369196	-275.007	12.0771	0.00779592	0.0889521	-0.333854	C00104
IMP	0.803083	21.7011	15.6048	6.65232e-05	0.791571	0.0238467	C00130
acetyl.carnitine	0.306932	-1319.27	63.7723	0.0232349	0.206513	-0.17339	C02571
palmytoyl.carnitine	0.140523	598.056	7.77312	0.077138	0.150426	0.23713	C02990
acetyl.choline	0.132457	1.80608	0.0101365	0.0846185	0.0889521	0.325329	C01996
phosphocholine	0.224888	-5562.15	261.507	0.040403	0.167356	-0.215512	C00588
glycerol_phosphocholine	0.0380425	-8017.88	207.597	0.181107	0.0204433	-0.481614	C00670
choline	0.00127429	2790.25	11.5538	0.399178	0.00554563	0.593716	C00114
carnitine	0.224888	1097.32	35.6828	0.0395291	0.229949	0.158012	C00318
propionyl_carnitine	0.224888	117.144	2.92677	0.0369923	0.318875	0.10341	C03017
butyryl.carnitine	0.105998	140.251	1.22158	0.100528	0.161302	0.221529	C02862
octanoyl.carnitine	0.132457	9.64954	0.0687815	0.0830684	0.000506775	0.710879	C02838
glucose.6.p	0.0260159	3531.27	8.22061	0.205205	0.0627234	0.380656	C01172
g1p.f6p	0.0726131	8964.09	81.77	0.13166	0.0889521	0.324493	C00103
FBP	0.000639563	45031.7	-8.23896	0.437852	0.00501913	0.632049	C00354
GAP	0.0546983	3101.95	30.116	0.156372	0.167356	0.210386	C00118
DHAP	5.02827e-05	1597.76	-3.07296	0.610304	0.00554563	0.612214	C00111
BPG	0.369196	-315.63	11.0835	0.0112928	1	0.000222866	C00236
Xpg	0.0194978	1578.83	14.1192	0.233201	0.0393099	0.433029	C00197
PEP	0.497707	-33.0867	3.65201	0.00287631	0.244541	-0.142189	C00074
FAD	0.148756	24.8999	0.347845	0.071634	0.119492	0.273011	C00016
NAD	0.369196	-668.978	32.1941	0.0103713	0.791571	-0.023401	C00003
NADH	0.150661	-3758.5	125.408	0.064125	0.0933287	-0.316247	C00004
NADP	0.356341	-222.172	13.2905	0.0144608	0.229949	-0.151103	C00006
NADPH	0.0718175	-250.156	3.75903	0.133654	0.0889521	-0.333222	C00005
GSH	0.0194978	41734.6	43.2616	0.23495	0.0519485	0.398975	C00051
GSSG	0.497707	-7025.95	1316.65	0.00175006	0.791571	-0.0247382	C00127
sedoheptulose.7.p	0.0157454	1508.12	6.05777	0.249152	0.0288944	0.454425	C05382
X6.PG	0.497707	139.305	29.6034	0.000506159	0.791571	0.0285269	C00345
Erythrose.5.p	0.103835	518.912	5.61916	0.102857	0.0933287	0.314465	C00279
ribose.5.p	0.00222433	2460	2.00633	0.366009	0.0186041	0.488969	C00117
ribulose.5.p	0.000113929	3925.85	-2.48558	0.566703	0.00554563	0.599288	C00199
xylulose.5.p	0.000113929	3925.85	-2.48558	0.566703	0.00554563	0.599288	C00231
acetyl.CoA	0.356341	-55.3235	2.16077	0.0163983	0.725089	-0.0354627	C00024
quinolinic.acid	0.000519995	362.308	-1.29153	0.450677	0.0488978	0.410297	C03722
kynurenine	0.0940748	212.273	2.12889	0.11037	0.0933287	0.315356	C00328
tryptamine	0.497707	0.0733622	0.00396666	0.00188959	0.285599	0.121447	C00398
indole.3.acetate	0.0158383	-14.4559	0.34446	0.24703	0.00501913	-0.624388	C00954
ornithine	0.0652209	-1714.7	43.4084	0.13998	0.0284788	-0.457099	C00077
citruline.c18	0.00692405	394.991	3.10483	0.292366	0.00554563	0.604637	C00327
Urea	0.148756	-32550.7	1492.9	0.072501	0.0804394	-0.345666	C00086
Arginosuccinate	0.497707	-246.973	17.9774	0.00246571	0.285599	-0.119456	C03406
glutamate	0.225664	8282.72	877.723	0.023001	0.119492	0.226507	C00025
glutamine	0.00176331	-3742.27	192.488	0.26857	0.00669947	-0.473846	C00064
lactate	0.0214832	80828.8	3855.85	0.147114	0.00917629	0.454135	C00186
pyruvate	0.224888	165.784	8.51461	0.0248702	0.0443575	0.345244	C00022
citrate	0.369196	-276.53	46.7601	0.00581387	0.191144	-0.149642	C00158
Fumarate	0.497707	75.7572	25.8447	0.00148256	1	-0.00217542	C00122
malate	0.00696308	2829.53	52.9766	0.199042	0.0532808	0.321039	C00149
AKG	0.148756	-236.485	11.8281	0.0470124	0.0889521	-0.265006	C00026
g1p.1	0.0260159	3531.27	8.22061	0.205205	0.0627234	0.380656	C05345
xpg.1	0.369196	-315.63	11.0835	0.0112928	1	0.000222866	C00631

## Sheet: Lpr
	Pearson correlations				Spearman correlations
	Corrected P-value	Slope	Intercept	r2	Corrected P-value	spearman_coef	KEGG ID
alanine	0.119558	-659.433	359.08	0.0863622	0.126868	-0.318225	C00041
arginine	0.0181658	541.13	25.9247	0.243989	0.0402863	0.469186	C00062
asparagine	0.0137324	199.705	5.59293	0.295081	0.0440127	0.446854	C00152
aspartate	0.0165719	1021.83	-30.8025	0.26498	0.0414746	0.452884	C00049
cystine	0.162208	111.144	7.75359	0.0608698	0.34686	0.0256813	C00491
cysteine	0.250738	-39.9713	20.968	0.00615389	0.661885	-0.00267979	C00097
glycine	0.0137324	963.1	101.814	0.290663	0.0104613	0.58464	C00037
histidine	0.119558	85.8322	48.077	0.0870096	0.138376	0.29433	C00135
isoleucine	0.0165719	130.218	11.5923	0.256595	0.0597664	0.399512	C00407
leucine	0.172888	241.17	59.5579	0.0433717	0.116028	0.329167	C00123
lysine	0.117926	598.608	119.393	0.0889316	0.191666	0.214383	C00047
methionine	0.00816748	427.401	6.24439	0.348622	0.0165789	0.55092	C00073
phenylalanine	0.0165719	163.524	15.7152	0.262205	0.0583184	0.409114	C00079
proline	0.0158996	449.22	16.044	0.271643	0.0830897	0.367577	C00148
serine	0.0415975	235.637	44.0527	0.173426	0.0776045	0.374277	C00716
threonine	0.016284	240.5	40.4139	0.268126	0.0414746	0.454894	C00188
tryptophan	0.00283776	72.8526	6.55072	0.458482	0.00264753	0.664364	C00078
tyrosine	0.00450354	191.559	15.4811	0.383592	0.0140834	0.564542	C00082
valine	0.0293842	187.504	44.8777	0.207359	0.0695374	0.384103	C00183
ATP	0.172888	2009.5	456.245	0.0423531	0.138376	0.281154	C00002
ADP	0.0590451	3560	-83.0241	0.142618	0.0399522	0.476779	C00008
AMP	0.250738	703.731	317.941	0.00948947	0.285719	0.0989288	C00020
alpha.hydroybutyrate	0.067168	-797.657	265.613	0.125711	0.059555	-0.405541	C05984
beta.hydroybutyrate	0.0165719	-661.039	208.624	0.263271	0.0330538	-0.505586	C01089
gamma.hydroybutyrate	0.0137324	-152.924	57.4331	0.297455	0.0330538	-0.502237	C01991
X2.aminobutyrate	0.038657	16.8856	3.01506	0.182388	0.0510995	0.42363	C02356
X3.aminobutyrate	0.0137324	-182.902	47.4084	0.3024	0.0165789	-0.547184	NA
GABA	0.0589961	-76.3217	29.2962	0.147524	0.0597664	-0.398618	C00334
dimethylglycine	0.180498	-2.86646	1.56982	0.0361771	0.147087	-0.265887	C01026
ethanolamine	0.212497	33.5369	18.2864	0.0254424	0.237774	0.147388	C00189
hypotaurine	0.24753	127.202	40.2346	0.0199519	0.661885	0.0071461	C00519
beta.alanine	0.250738	169.419	67.4629	0.0163235	0.661885	0.00781605	C00099
xanthine	0.21189	2.88683	1.58776	0.0293401	0.236814	0.153641	C00385
X2.hydroxyphenylpuruvate	0.0408502	0.350818	0.000862841	0.175905	0.196488	0.202079	C01179
homocitrulline	0.038657	-0.421191	0.160612	0.184716	0.165831	-0.250588	C02427
meso.erythritol	0.240079	43.3383	11.894	0.0215016	0.197112	0.188032	C00503
adipic.acid	0.162208	0.248208	0.048148	0.0640415	0.285719	0.0969729	C06104
sorbitol	0.0590451	-243.339	75.725	0.139567	0.197112	-0.191605	C00794
taurine	0.250738	-43.7767	148.548	0.0041427	0.285719	-0.116124	C00245
myo.inositol	0.00979113	2.89137e+06	-119746	0.326954	0.0233938	0.525015	C00137
xylonic.acid	0.0597847	35.3466	7.17095	0.1372	0.138376	0.29299	NA
maltose	0.0536555	-146.157	49.2138	0.155842	0.0927717	-0.353732	C00897
X5.deoxyribose	0.250738	-7.82943	8.6429	0.0057624	0.330589	0.0480129	C00673
Creatine	0.0185122	1587.8	-87.364	0.24118	0.0408737	0.462263	C00300
glucuronic.acid	0.0415975	22.3439	0.429219	0.172051	0.197112	0.189372	C00191
hydroxyhypurate	0.250738	397.381	100.125	0.0185673	0.183778	0.223762	NA
pyridoxal.5.p	0.162208	-2.16195	1.07461	0.0563055	0.237774	-0.14305	C00018
threonate	0.129057	37.7867	11.6301	0.0809682	0.110023	0.335197	C01620
histamine	0.00013934	146.088	-11.259	0.581523	0.000956355	0.705454	C00388
phosphoserine	0.162208	-1.95511	1.33484	0.0577847	0.286103	-0.0839667	C01005
glycerol.3.phosphate.1	0.107655	-812.933	507.175	0.0958233	0.0695374	-0.385666	C00093
glycerol.3.phosphate.2	0.250738	241.358	190.217	0.00644975	0.286103	0.0741408	C00093
glycerol	0.250738	-0.335539	0.709001	0.00158644	0.285719	0.117142	C00116
spermidine	0.250738	-32.1664	25.9545	0.0119136	0.285719	0.0911128	C00315
hydroxyproline	0.018946	74.0017	-0.552274	0.23808	0.0545122	0.417377	C01015
urocanic.acid	0.0137324	-0.351218	0.111335	0.293954	0.0330538	-0.502851	C00785
acetyl.glucosamine	0.167456	15.375	3.57451	0.0497677	0.183778	0.225772	C03878
betaine	0.250738	-129.968	80.9971	0.018035	0.285719	0.118357	C00719
pyroglutamate	0.00400909	85.6793	-0.0640256	0.407847	0.00264753	0.658781	C01879
homocysteine	0.0653683	4.676	0.936835	0.129869	0.165831	0.245898	NA
xanthosine	0.250738	2.01907	1.94565	0.0100922	0.293762	0.0645382	C01762
aminoadipic.acid	0.544935	1.42335	9.17461	0.000140008	0.330589	-0.0408668	C00956
S..2.Succinyl.cysteine	0.250738	1.10045	1.08496	0.0029125	0.197112	0.175992	NA
gluconic.acid	0.250738	-34.6206	31.8377	0.0107588	0.34686	-0.0285844	C00257
phosphorylethanolamine	0.008372	1294.01	18.0253	0.342128	0.0399522	0.480798	C00346
glyceric.acid	0.0590451	52.6169	1.13076	0.143575	0.0399522	0.475662	C00258
adenine	0.141018	8.68006	1.58905	0.0749211	0.260499	0.128183	C00147
adenosine	0.00400909	29.3474	0.386788	0.41666	0.0111285	0.577941	C00212
cytidine	0.0653683	0.622133	0.0210093	0.12872	0.117329	0.326225	C00475
cytosine	0.0540344	-7.01166	2.50552	0.153983	0.0927717	-0.353509	C00380
Guanine	0.018946	3.46471	-0.310579	0.238181	0.059555	0.401834	C00242
Guanosine	0.038657	32.5282	1.29592	0.185083	0.138376	0.283611	C00387
Thymine	0.162208	2.04875	0.222087	0.0642817	0.293762	-0.0649848	C00178
Uracil	0.162208	36.6676	8.17226	0.0540827	0.197112	0.177983	C00106
Uridine	0.0462749	10.4484	0.639583	0.164915	0.207305	0.167263	C00299
trimethyl.lysine	0.0137324	-3.02206	0.927965	0.295643	0.059555	-0.405764	C03793
assymetric.dimethylarginine	0.162208	1.65355	0.508031	0.0636914	0.165831	0.246317	C03626
alpha.acetyl.lysine	0.250738	-3.28491	3.64668	0.00317471	0.195645	-0.2084	C12989
acetyl.asparagine	0.0308813	-30.2489	9.36117	0.202513	0.0414746	-0.458467	NA
acetyl.glycine	0.162208	-0.991906	0.576925	0.0589605	0.135194	-0.299276	NA
epsilon.acetyl.lysine	0.017207	0.781596	0.0661014	0.2525	0.0196024	0.536188	C02727
acetyl.aspartate	0.00993648	67.0566	-5.38685	0.32258	0.0029292	0.643149	C01042
acetyl.cysteine	0.250738	2.29751	0.251546	0.0142809	0.182538	0.233175	C06809
hippurate	0.0325234	-29.9772	7.68378	0.197155	0.138376	-0.29366	C01586
CTP	0.250738	29.6144	11.157	0.0178663	0.197112	0.183342	C00063
cdp	0.162208	-755.791	396.917	0.0640554	0.183704	-0.230238	C00112
CMP	0.0192104	-57.8082	17.4931	0.232143	0.0510995	-0.425416	C00055
UTP	0.172888	307.602	55.2773	0.0463897	0.138376	0.29098	C00075
UDP	0.250738	130.645	74.2465	0.0154938	0.197112	0.182895	C00015
UMP	0.0783922	-159.13	68.8874	0.115257	0.0995299	-0.344576	C00105
GTP	0.250738	48.3769	74.6491	0.00186759	0.197112	0.195624	C00044
GDP	0.172888	-87.8587	55.235	0.0412919	0.286103	-0.0801703	C00035
GMP	0.250738	-39.0574	43.0502	0.0102358	0.286103	-0.0850832	C00144
ITP	0.179673	-2.49131	0.725445	0.0374007	0.0497416	-0.434464	C00081
IDP	0.141018	-51.9012	18.4667	0.0757479	0.0877263	-0.361771	C00104
IMP	0.250738	14.5983	13.403	0.00821205	0.197112	0.198974	C00130
acetyl.carnitine	0.112872	-159.181	79.9103	0.0922776	0.195645	-0.207237	C02571
palmytoyl.carnitine	0.0589961	49.7799	4.07487	0.145791	0.131199	0.310855	C02990
acetyl.choline	0.0590451	0.141891	0.000332401	0.142474	0.037712	0.489146	C01996
phosphocholine	0.250738	-182.994	250.648	0.01193	0.285719	-0.106298	C00588
glycerol_phosphocholine	0.067168	-402.363	214.342	0.12442	0.135194	-0.301699	C00670
choline	0.0165719	137.619	9.59501	0.264894	0.0399522	0.481245	C00114
carnitine	0.250738	31.7631	38.5264	0.00903507	0.285719	0.104065	C00318
propionyl_carnitine	0.21189	6.21455	2.77392	0.0284005	0.293762	0.0687812	C03017
butyryl.carnitine	0.500635	0.426652	2.17224	0.000253781	0.661885	0.00982589	C02862
octanoyl.carnitine	0.0308813	0.913618	-0.00873772	0.203137	0.00011144	0.766813	C02838
glucose.6.p	0.162208	120.224	14.4606	0.0648854	0.183778	0.221752	C01172
g1p.f6p	0.0939725	484.712	68.593	0.105013	0.138376	0.286291	C00103
FBP	0.00283776	2780.87	-130.342	0.455502	0.00264753	0.66749	C00354
GAP	0.017207	238.339	14.1436	0.251834	0.0497416	0.430776	C00118
DHAP	0.00400909	80.0468	-4.39553	0.417876	0.0402863	0.470303	C00111
BPG	1	0.299429	8.74047	2.77248e-06	0.165612	0.253017	C00236
Xpg	0.150731	52.0682	17.1813	0.0691895	0.197112	0.199198	C00197
PEP	0.202405	-6.64473	4.48548	0.0316461	0.147087	-0.267309	C00074
FAD	0.0589961	2.16708	0.178595	0.148016	0.0579347	0.411571	C00016
NAD	0.167456	88.758	12.9845	0.0498037	0.138376	0.287854	C00003
NADH	0.212497	-148.507	122.088	0.0273104	0.237774	-0.145155	C00004
NADP	0.250738	9.45235	10.1475	0.00714051	0.293762	0.0640916	C00006
NADPH	0.172888	-8.73974	3.35303	0.0445032	0.249734	-0.134451	C00005
GSH	0.0395773	2206.09	-9.90758	0.179088	0.0879046	0.359578	C00051
GSSG	0.250738	1395.39	1040.03	0.0188308	0.195645	0.21014	C00127
sedoheptulose.7.p	0.017207	91.7158	2.19741	0.251373	0.0440127	0.446631	C05382
X6.PG	0.0599692	138.063	8.30051	0.135627	0.165831	0.25056	C00345
Erythrose.5.p	0.162208	23.9623	5.51853	0.0598326	0.138376	0.282048	C00279
ribose.5.p	0.0977137	78.5447	7.195	0.101787	0.183778	0.227782	C00117
ribulose.5.p	0.0137324	173.445	-1.97926	0.30175	0.0497416	0.435465	C00199
xylulose.5.p	0.0137324	173.445	-1.97926	0.30175	0.0497416	0.435465	C00231
acetyl.CoA	0.212497	4.30821	1.06222	0.0271275	0.236814	0.15357	C00024
quinolinic.acid	0.0137324	18.0217	-1.57047	0.304185	0.0414746	0.459137	C03722
kynurenine	0.250738	5.1313	2.84271	0.0175936	0.285719	0.115008	C00328
tryptamine	1	-0.000153866	0.00452487	2.26751e-06	0.34686	0.0320605	C00398
indole.3.acetate	0.0262377	-0.816143	0.371283	0.214799	0.0165789	-0.553946	C00954
ornithine	0.173714	-55.2141	39.867	0.0395935	0.138376	-0.284727	C00077
citruline.c18	0.00971045	25.4567	1.86175	0.331279	0.00772386	0.600496	C00327
Urea	0.0352562	-3202.19	1773.84	0.191406	0.131199	-0.313535	C00086
Arginosuccinate	0.162208	69.0576	5.01993	0.0525897	0.34686	0.0346139	C03406
glutamate	0.141018	788.109	789.285	0.0483847	0.131199	0.251707	C00025
glutamine	0.00400909	-255.619	208.469	0.291145	0.00369436	-0.528941	C00064
lactate	0.018946	5555.29	3502.52	0.161462	0.037712	0.403417	C00186
pyruvate	0.250738	7.35362	8.75427	0.0113692	0.131199	0.25409	C00022
citrate	0.544935	-1.86135	43.8771	6.12034e-05	0.330589	0.0368062	C00158
Fumarate	0.250738	8.0343	24.8387	0.00387432	0.285719	0.0800106	C00122
malate	0.00816748	206.122	37.8272	0.245414	0.0402863	0.382903	C00149
AKG	0.172888	-12.3493	11.93	0.0297871	0.135194	-0.245507	C00026
g1p.1	0.162208	120.224	14.4606	0.0648854	0.183778	0.221752	C05345
xpg.1	1	0.299429	8.74047	2.77248e-06	0.165612	0.253017	C00631

## Sheet: SNR lac
	Pearson correlations				Spearman correlations
	Corrected P-value	Slope	Intercept	r2	Corrected P-value	spearman_coef	KEGG ID
alanine	0.133654	-10.6397	320.512	0.0911882	0.285468	-0.21427	C00041
arginine	0.0683698	7.46564	65.662	0.188367	0.0603451	0.486512	C00062
asparagine	0.0683698	2.53214	21.6841	0.192416	0.117647	0.420737	C00152
aspartate	0.0706473	12.9878	51.3296	0.173631	0.212044	0.315274	C00049
cystine	0.0921734	2.60845	9.04252	0.135987	0.285468	0.220959	C00491
cysteine	0.420509	0.371496	12.1323	0.00215607	0.433532	0.100335	C00097
glycine	0.0966403	10.1927	192.322	0.132048	0.180579	0.341807	C00037
histidine	0.23635	0.844025	56.5546	0.0341255	0.323047	0.168339	C00135
isoleucine	0.0789463	1.61376	22.3231	0.159841	0.212044	0.311929	C00407
leucine	0.235042	3.62024	75.3951	0.0396402	0.259024	0.275809	C00123
lysine	0.180549	7.65537	167.207	0.0589938	0.285468	0.245263	C00047
methionine	0.0683698	5.19372	42.1236	0.208805	0.143543	0.370792	C00073
phenylalanine	0.0789463	2.00904	29.3024	0.160531	0.212044	0.309254	C00079
proline	0.0726569	5.58477	52.9499	0.170291	0.283748	0.253289	C00148
serine	0.102439	3.07037	62.5109	0.11943	0.142293	0.377927	C00716
threonine	0.0883765	2.7411	61.763	0.141275	0.188841	0.326422	C00188
tryptophan	0.0503535	0.844115	12.9298	0.249653	0.0968693	0.449499	C00078
tyrosine	0.0683698	2.33154	31.5381	0.230489	0.104498	0.439466	C00082
valine	0.0966403	2.29595	60.5068	0.126104	0.21858	0.301004	C00183
ATP	0.386712	11.3313	708.607	0.00546223	0.440708	0.0885175	C00002
ADP	0.132583	45.655	200.522	0.0951376	0.285468	0.244594	C00008
AMP	0.386712	9.04266	373.878	0.00635512	0.528248	-0.0537348	C00020
alpha.hydroybutyrate	0.180549	-8.79842	192.933	0.0620374	0.285468	-0.248384	C05984
beta.hydroybutyrate	0.0374785	-10.6611	169.933	0.277748	0.0303693	-0.541361	C01089
gamma.hydroybutyrate	0.00374074	-2.94709	51.5561	0.448086	0.000968032	-0.694762	C01991
X2.aminobutyrate	0.180549	0.158257	4.73261	0.064982	0.285468	0.197771	C02356
X3.aminobutyrate	0.0683698	-2.43848	33.4344	0.218014	0.180579	-0.340953	NA
GABA	0.0789463	-1.2422	24.9013	0.158507	0.142293	-0.374137	C00334
dimethylglycine	0.379432	-0.0250317	1.26653	0.0111899	0.443842	-0.0783813	C01026
ethanolamine	0.379432	0.374776	21.3111	0.0128872	0.346772	0.140692	C00189
hypotaurine	0.379432	1.32716	52.3102	0.00880941	0.418716	0.105909	C00519
beta.alanine	0.420509	0.825418	89.5699	0.00157158	0.440708	-0.0896323	C00099
xanthine	0.379432	0.0261978	1.88689	0.00980053	0.440708	0.0876256	C00385
X2.hydroxyphenylpuruvate	0.180549	0.00320877	0.0370532	0.0596891	0.528248	-0.0526434	C01179
homocitrulline	0.0966403	-0.00556025	0.12808	0.130568	0.346772	-0.153864	C02427
meso.erythritol	0.244346	0.792477	13.8326	0.0291611	0.285468	0.201784	C00503
adipic.acid	0.200675	0.00343201	0.066326	0.0496626	0.285468	0.207251	C06104
sorbitol	0.0966403	-3.66897	59.8488	0.128692	0.285468	-0.230101	C00794
taurine	0.344467	-1.3347	150.005	0.0156195	0.323047	-0.171238	C00245
myo.inositol	0.0683698	37528.5	107679	0.22341	0.0574916	0.497437	C00137
xylonic.acid	0.133654	0.454793	9.97667	0.0921276	0.323047	0.172799	NA
maltose	0.180549	-1.48294	35.0702	0.0650721	0.440708	-0.0947605	C00897
X5.deoxyribose	0.386712	-0.0964037	7.9937	0.00354351	0.48538	0.0608697	C00673
Creatine	0.0789463	20.2603	39.7553	0.159273	0.283748	0.254404	C00300
glucuronic.acid	0.156178	0.238986	2.51291	0.0798342	0.539095	-0.0218507	C00191
hydroxyhypurate	0.286328	6.61764	122.049	0.0208855	0.528248	0.0535118	NA
pyridoxal.5.p	0.177309	-0.0370319	0.961909	0.0670061	0.346772	-0.146839	C00018
threonate	0.238679	0.365671	15.4	0.0307552	0.323047	0.173468	C01620
histamine	0.00302426	2.08779	-0.993486	0.481744	0.00047749	0.737572	C00388
phosphoserine	0.0966403	-0.0453769	1.30892	0.126253	0.259024	-0.27514	C01005
glycerol.3.phosphate.1	0.0820958	-16.0328	478.275	0.151175	0.120297	-0.39844	C00093
glycerol.3.phosphate.2	0.420509	-0.308149	231.198	4.26426e-05	0.624748	0.012932	C00093
glycerol	0.420509	0.00575838	0.617954	0.00189514	0.314534	0.180511	C00116
spermidine	0.259141	-0.755621	25.5859	0.0266655	0.433532	-0.101004	C00315
hydroxyproline	0.0683698	1.01574	4.91533	0.18193	0.117647	0.427426	C01015
urocanic.acid	0.0683698	-0.00478868	0.0851804	0.221647	0.180579	-0.343071	C00785
acetyl.glucosamine	0.23635	0.203409	4.75925	0.0353312	0.285468	0.247492	C03878
betaine	0.386712	-1.08336	66.9158	0.00508263	0.285468	0.248161	C00719
pyroglutamate	0.0374785	1.12383	6.60001	0.284611	0.0115438	0.59688	C01879
homocysteine	0.128394	0.0642146	1.28211	0.0993402	0.285468	0.242614	NA
xanthosine	0.420509	0.00347007	2.24982	0.000120909	0.624748	-0.0120402	C01762
aminoadipic.acid	0.420509	-0.0510538	9.73105	0.00073062	0.528248	-0.0425865	C00956
S..2.Succinyl.cysteine	0.386712	0.0208134	1.12977	0.0042259	0.346772	0.149738	NA
gluconic.acid	0.379432	-0.508406	29.4921	0.00941056	0.528248	0.0287626	C00257
phosphorylethanolamine	0.0374785	18.3694	109.746	0.279646	0.117647	0.416723	C00346
glyceric.acid	0.0683698	0.961163	3.49075	0.194324	0.00805845	0.616278	C00258
adenine	0.286328	0.0732909	2.52349	0.0216651	0.46104	0.0713491	C00147
adenosine	0.0135488	0.432763	2.36368	0.36749	0.0672951	0.476924	C00212
cytidine	0.180549	0.00693579	0.0772266	0.0648897	0.285468	0.240299	C00475
cytosine	0.0683698	-0.129349	2.19912	0.212549	0.0831464	-0.461763	C00380
Guanine	0.0820958	0.0434004	-0.0280226	0.151587	0.285468	0.234835	C00242
Guanosine	0.128394	0.374063	4.16221	0.0992743	0.346772	0.146266	C00387
Thymine	0.180615	0.0300004	0.361443	0.0559069	0.440708	0.0927539	C00178
Uracil	0.235042	0.500803	10.8974	0.0409193	0.286587	0.190636	C00106
Uridine	0.144106	0.118495	1.57087	0.086032	0.528248	0.0497214	C00299
trimethyl.lysine	0.0133372	-0.0538461	0.783734	0.380691	0.00281932	-0.657081	C03793
assymetric.dimethylarginine	0.324002	0.0136046	0.688327	0.0174872	0.363995	0.126422	C03626
alpha.acetyl.lysine	0.386712	-0.0764165	3.60426	0.00696842	0.363995	-0.125112	C12989
acetyl.asparagine	0.0683698	-0.470181	7.47777	0.198456	0.117647	-0.425419	NA
acetyl.glycine	0.379432	-0.00735029	0.46359	0.013132	0.363995	-0.127774	NA
epsilon.acetyl.lysine	0.0845793	0.0093037	0.132955	0.145114	0.117647	0.422949	C02727
acetyl.aspartate	0.0683698	0.844609	0.052201	0.207572	0.180579	0.344482	C01042
acetyl.cysteine	0.270898	0.0465789	0.325124	0.0238079	0.285468	0.23733	C06809
hippurate	0.0683698	-0.489765	5.9695	0.213454	0.0574916	-0.494539	C01586
CTP	0.420509	0.0493146	15.6284	0.000200948	0.528248	0.0481607	C00063
cdp	0.104964	-15.8786	376.267	0.114678	0.235941	-0.285619	C00112
CMP	0.0683698	-0.865131	13.6801	0.210883	0.117647	-0.409366	C00055
UTP	0.420509	1.09355	98.005	0.00237807	0.46104	0.0706802	C00075
UDP	0.420509	-0.348243	97.5895	0.000446516	0.528248	-0.0399109	C00015
UMP	0.0785185	-2.98462	62.2472	0.164454	0.154386	-0.363212	C00105
GTP	0.386712	-1.39612	91.3937	0.00630888	0.922965	0.00356746	C00044
GDP	0.107928	-2.27089	55.5518	0.11189	0.273019	-0.262208	C00035
GMP	0.174573	-1.59054	46.9055	0.0688501	0.285468	-0.248161	C00144
ITP	0.218959	-0.042614	0.595195	0.0443847	0.226051	-0.292425	C00081
IDP	0.180549	-0.731335	14.7531	0.061003	0.27071	-0.267559	C00104
IMP	0.386712	-0.205191	17.0743	0.00658059	0.539095	-0.0234114	C00130
acetyl.carnitine	0.180549	-2.09373	67.5664	0.0647526	0.46104	-0.0735788	C02571
palmytoyl.carnitine	0.235042	0.410263	9.49818	0.040165	0.314534	0.179711	C02990
acetyl.choline	0.132583	0.00181259	0.0116789	0.0943037	0.212044	0.313631	C01996
phosphocholine	0.259679	-4.2199	248.048	0.0257319	0.346772	-0.141137	C00588
glycerol_phosphocholine	0.0683698	-8.56537	204.065	0.228691	0.129623	-0.38863	C00670
choline	0.0683698	1.82589	20.1659	0.189135	0.117647	0.418284	C00114
carnitine	0.420509	0.256737	42.019	0.00239422	0.528248	0.0332219	C00318
propionyl_carnitine	0.379432	0.066784	3.35145	0.0133031	0.528248	0.0517281	C03017
butyryl.carnitine	0.420509	-0.0116437	2.31564	0.000766642	0.787722	0.00624305	C02862
octanoyl.carnitine	0.0235167	0.018372	0.0214822	0.333177	0.000701331	0.712981	C02838
glucose.6.p	0.200675	1.63953	23.4114	0.0489445	0.285468	0.213601	C01172
g1p.f6p	0.155073	6.70097	104.1	0.0814058	0.273019	0.260424	C00103
FBP	0.0235167	37.0165	82.4959	0.327356	0.037792	0.526646	C00354
GAP	0.0886807	2.78543	34.86	0.139512	0.285468	0.249276	C00118
DHAP	0.0374785	1.04535	1.85988	0.289055	0.129623	0.390859	C00111
BPG	0.379432	0.256643	7.14816	0.0082612	0.285468	0.242364	C00236
Xpg	0.235042	0.625633	21.5976	0.040517	0.285468	0.239243	C00197
PEP	0.235042	-0.114096	4.14087	0.0378448	0.373845	-0.116388	C00074
FAD	0.156178	0.0248968	0.369703	0.079241	0.285468	0.194649	C00016
NAD	0.420509	0.203113	26.0322	0.00105785	0.440708	0.0871797	C00003
NADH	0.189574	-3.24559	118.833	0.0529083	0.285468	-0.216946	C00004
NADP	0.420509	-0.0528325	12.013	0.000904802	0.48538	-0.0628764	C00006
NADPH	0.102439	-0.224834	3.37775	0.119459	0.226051	-0.295017	C00005
GSH	0.102439	28.3757	165.266	0.120176	0.212044	0.31464	C00051
GSSG	0.420509	-6.18158	1305.09	0.00149893	0.574453	-0.0167224	C00127
sedoheptulose.7.p	0.0683698	1.27561	8.86684	0.197228	0.142293	0.379265	C05382
X6.PG	0.156178	1.64363	20.1085	0.0779653	0.285468	0.239911	C00345
Erythrose.5.p	0.379432	0.165514	8.33351	0.0115786	0.346772	0.154961	C00279
ribose.5.p	0.156178	1.06982	13.0512	0.0765917	0.180579	0.339354	C00117
ribulose.5.p	0.0683698	2.26161	11.5969	0.208095	0.117647	0.423412	C00199
xylulose.5.p	0.0683698	2.26161	11.5969	0.208095	0.117647	0.423412	C00231
acetyl.CoA	0.23635	0.0755345	1.27568	0.0338227	0.285468	0.215669	C00024
quinolinic.acid	0.0683698	0.221458	-0.0733354	0.186309	0.356129	0.133111	C03722
kynurenine	0.173358	0.161102	2.64219	0.0703404	0.156655	0.359644	C00328
tryptamine	0.379432	0.00017301	0.00339396	0.011628	0.346772	0.155462	C00398
indole.3.acetate	0.0785185	-0.0111618	0.310724	0.162957	0.027637	-0.556647	C00954
ornithine	0.23635	-0.82462	36.2143	0.0358207	0.285468	-0.239243	C00077
citruline.c18	0.0374785	0.363247	3.65418	0.273587	0.027637	0.554516	C00327
Urea	0.0371268	-62.5397	1656.07	0.296124	0.0488548	-0.509923	C00086
Arginosuccinate	0.23635	0.866139	10.6448	0.0335548	0.363995	0.128874	C03406
glutamate	0.0683698	48.2552	647.49	0.13259	0.104498	0.361826	C00025
glutamine	0.386712	-0.937949	153.873	0.00286528	0.922965	0.00210977	C00064
lactate	0.0966403	150.506	3799.47	0.0866263	0.226051	0.240053	C00186
pyruvate	0.107928	0.693578	5.76778	0.0739274	0.180579	0.275401	C00022
citrate	0.0834407	-2.7561	62.2746	0.0980833	0.27071	-0.215197	C00158
Fumarate	0.126517	-1.23445	35.1954	0.0668556	0.166489	-0.287127	C00122
malate	0.379432	-1.21165	95.3049	0.00619863	0.323047	-0.136212	C00149
AKG	0.386712	0.146558	7.98075	0.00306651	0.528248	0.0268996	C00026
g1p.1	0.200675	1.63953	23.4114	0.0489445	0.285468	0.213601	C05345
xpg.1	0.379432	0.256643	7.14816	0.0082612	0.285468	0.242364	C00631

## Sheet: SNR pyr
	Pearson correlations				Spearman correlations
	Corrected P-value	Slope	Intercept	r2	Corrected P-value	spearman_coef	KEGG ID
alanine	0.580854	0.591866	226.453	0.0240131	0.228164	0.346266	C00041
arginine	0.0784707	0.920098	72.9071	0.243476	0.00781183	0.60513	C00062
asparagine	0.580854	-0.120207	43.1607	0.0369013	0.290655	0.249053	C00152
aspartate	0.541758	-0.734196	166.663	0.0472169	0.432761	0.0147158	C00049
cystine	8.83865e-06	0.620589	-1.58634	0.655026	0.000168725	0.736011	C00491
cysteine	0.580854	0.139591	8.3656	0.025905	0.339189	0.156076	C00097
glycine	0.765279	-0.0530966	259.819	0.000304931	0.286364	0.261093	C00037
histidine	0.580854	0.0863343	58.1519	0.0303846	0.254708	0.316835	C00135
isoleucine	0.580854	-0.0840844	36.3393	0.0369284	0.339189	0.139354	C00407
leucine	0.580854	-0.287469	111.187	0.0212696	0.339189	0.157637	C00123
lysine	0.109968	1.53846	148.459	0.202751	0.0103861	0.578374	C00047
methionine	0.498314	-0.280566	87.671	0.051853	0.39493	-0.052397	C00073
phenylalanine	0.580854	-0.106216	46.8193	0.038184	0.339189	0.120179	C00079
proline	0.498314	-0.343812	103.78	0.0549213	0.374696	0.0882945	C00148
serine	0.764926	-0.0455046	84.1417	0.00223233	0.275652	0.292754	C00716
threonine	0.580854	-0.159519	86.3052	0.040715	0.339189	0.151617	C00188
tryptophan	0.580854	-0.0253564	19.4418	0.0191702	0.339189	0.146712	C00078
tyrosine	0.580854	-0.0522589	48.7427	0.00985378	0.290655	0.253958	C00082
valine	0.580854	-0.110574	80.0496	0.02489	0.339189	0.170792	C00183
ATP	0.765279	0.440068	761.685	0.000701084	0.40001	0.0216277	C00002
ADP	0.765279	-0.298343	505.518	0.000345719	0.559677	0.00869567	C00008
AMP	0.765279	0.511958	409.163	0.00173348	0.392731	-0.0706802	C00020
alpha.hydroybutyrate	0.580854	0.545416	112.688	0.020287	0.293983	0.22252	C05984
beta.hydroybutyrate	0.0784707	-1.07166	148.929	0.238827	0.00901404	-0.594873	C01089
gamma.hydroybutyrate	0.0784707	-0.234188	43.0193	0.240782	0.00490751	-0.632777	C01991
X2.aminobutyrate	0.765279	0.00246018	5.63609	0.00133634	0.277216	0.272687	C02356
X3.aminobutyrate	0.580854	-0.0706236	20.9526	0.015562	0.35752	0.0947711	NA
GABA	0.583293	0.027659	15.7431	0.00668742	0.339189	0.170346	C00334
dimethylglycine	0.277963	0.00878222	0.720103	0.117212	0.117186	0.4093	C01026
ethanolamine	0.580854	-0.0509682	25.9495	0.0202829	0.293983	0.232554	C00189
hypotaurine	0.548892	0.323923	46.5427	0.0446585	0.229266	0.340469	C00519
beta.alanine	0.580854	-0.25078	105.88	0.012345	0.31695	0.19844	C00099
xanthine	0.764926	0.00136893	1.99414	0.00227719	0.290655	0.25708	C00385
X2.hydroxyphenylpuruvate	0.277963	-0.000490329	0.07914	0.118607	0.159507	-0.374304	C01179
homocitrulline	0.498314	-0.000393499	0.109846	0.0556485	0.339189	-0.115509	C02427
meso.erythritol	0.580854	-0.0528393	21.2237	0.0110322	0.292418	0.238351	C00503
adipic.acid	0.659287	-0.000107179	0.0929823	0.00412165	0.31695	0.189627	C06104
sorbitol	0.580854	-0.14883	42.9415	0.0180204	0.339189	0.120402	C00794
taurine	0.580854	0.19105	133.066	0.0272341	0.254708	0.310369	C00245
myo.inositol	0.580854	-1012.52	392144	0.0138389	0.290655	0.256634	C00137
xylonic.acid	0.580854	0.0319784	11.4772	0.0387609	0.254708	0.32174	NA
maltose	0.580854	0.117601	20.4157	0.0348244	0.0263622	0.522855	C00897
X5.deoxyribose	0.765279	-0.00452827	7.57663	0.000665316	0.293983	0.232999	C00673
Creatine	0.580854	-1.04126	215.091	0.0358002	0.39493	0.0568563	C00300
glucuronic.acid	0.277963	-0.0313358	5.41944	0.116801	0.122988	-0.402677	C00191
hydroxyhypurate	0.368463	1.46139	100.058	0.0866735	0.39493	-0.0673357	NA
pyridoxal.5.p	0.659287	0.000937667	0.683911	0.00365576	0.339189	0.151968	C00018
threonate	0.652918	0.016239	17.0232	0.00516145	0.339189	0.139131	C01620
histamine	0.348607	0.100797	7.9188	0.0955552	0.0062453	0.618508	C00388
phosphoserine	0.155002	-0.00563535	1.26678	0.165703	0.31695	-0.197548	C01005
glycerol.3.phosphate.1	0.193392	-1.74052	452.357	0.151614	0.301693	-0.205352	C00093
glycerol.3.phosphate.2	0.580854	0.980793	186.075	0.0367616	0.31695	0.198886	C00093
glycerol	0.786991	-4.20173e-05	0.656615	8.58647e-06	0.275652	0.292229	C00116
spermidine	0.348607	-0.153778	27.5212	0.0939826	0.275652	-0.284282	C00315
hydroxyproline	0.580854	-0.0436802	13.3307	0.0286304	0.275652	0.280714	C01015
urocanic.acid	0.580854	-0.000183819	0.0626543	0.0277924	0.293983	-0.217751	C00785
acetyl.glucosamine	0.580854	-0.0208536	6.97714	0.0316008	0.339189	0.166779	C03878
betaine	0.580854	0.159859	52.9566	0.00941754	0.00463587	0.641919	C00719
pyroglutamate	0.786991	0.00168701	13.7104	5.45758e-05	0.0642927	0.468452	C01879
homocysteine	0.0417149	0.0122202	1.15497	0.306149	0.127782	0.39737	NA
xanthosine	0.765279	0.000757633	2.23867	0.000490478	0.293983	0.226533	C01762
aminoadipic.acid	0.368463	0.0612182	6.71121	0.089395	0.254708	0.321294	C00956
S..2.Succinyl.cysteine	0.580854	0.0046067	1.06015	0.0176169	0.275652	0.294236	NA
gluconic.acid	0.392921	-0.162149	33.3761	0.0814591	0.39493	-0.0408028	C00257
phosphorylethanolamine	0.459241	0.940703	185.791	0.062408	0.0706576	0.459979	C00346
glyceric.acid	0.498314	0.0559614	7.17323	0.0560566	0.0154339	0.549834	C00258
adenine	0.368463	0.0159892	2.28854	0.0877476	0.0988921	0.434338	C00147
adenosine	0.111105	0.0342131	3.625	0.195456	0.234611	0.33601	C00212
cytidine	0.786991	-1.80275e-05	0.12236	3.73053e-05	0.390024	0.0799511	C00475
cytosine	0.0784707	-0.0151274	2.03777	0.24739	0.00913509	-0.589745	C00380
Guanine	0.580854	-0.00163602	0.321415	0.0183303	0.39493	0.0390277	C00242
Guanosine	0.457321	-0.0327142	7.99292	0.0646157	0.39493	-0.0512822	C00387
Thymine	0.0417149	0.0076214	0.217909	0.307043	0.117186	0.411595	C00178
Uracil	0.659287	-0.0179886	14.8904	0.00449272	0.39493	0.0604238	C00106
Uridine	0.392921	-0.0124481	2.87609	0.0807949	0.390024	-0.078707	C00299
trimethyl.lysine	0.0321804	-0.0055618	0.684207	0.345632	4.919e-05	-0.76901	C03793
assymetric.dimethylarginine	0.276352	-0.00389361	0.94661	0.121891	0.291906	-0.24281	C03626
alpha.acetyl.lysine	0.276352	0.0348643	1.58178	0.123435	0.10746	0.419938	C12989
acetyl.asparagine	0.786991	-0.00142265	4.53453	0.000154614	0.339189	0.135117	NA
acetyl.glycine	0.580854	0.00118651	0.364396	0.0291196	0.39493	-0.0548557	NA
epsilon.acetyl.lysine	0.659287	0.000183105	0.184377	0.0047832	0.31695	0.182984	C02727
acetyl.aspartate	0.580854	-0.0401899	7.22	0.0399952	0.390024	-0.0800448	C01042
acetyl.cysteine	0.580854	0.00313485	0.484974	0.0091769	0.339189	0.162063	C06809
hippurate	0.232635	-0.0425292	4.70966	0.136969	0.0153344	-0.556523	C01586
CTP	0.392921	-0.105282	20.5759	0.0779396	0.292418	-0.240357	C00063
cdp	0.0543495	-2.68043	392.689	0.278088	0.14665	-0.384616	C00112
CMP	0.485174	-0.0493269	10.3196	0.0583398	0.339189	-0.16767	C00055
UTP	0.580854	-0.230714	115.147	0.00900763	0.349749	-0.10145	C00075
UDP	0.145677	-0.74044	127.941	0.171779	0.234611	-0.333334	C00015
UMP	0.111105	-0.355517	58.8087	0.198566	0.258299	-0.302565	C00105
GTP	0.764926	-0.0899229	86.4248	0.00222723	0.374696	-0.0882945	C00044
GDP	0.308052	-0.238785	51.5401	0.105276	0.275652	-0.291194	C00035
GMP	0.308113	-0.211237	46.0312	0.103342	0.293983	-0.211149	C00144
ITP	0.580854	-0.00298928	0.454288	0.0185857	0.40001	-0.0242107	C00081
IDP	0.580854	-0.0274908	11.2873	0.00733516	0.339189	0.130658	C00104
IMP	0.392921	-0.076974	19.1492	0.0788052	0.292418	-0.238797	C00130
acetyl.carnitine	0.765279	0.0330646	52.7265	0.00137423	0.228164	0.346489	C02571
palmytoyl.carnitine	0.580854	0.0327951	10.6781	0.0218403	0.339189	0.151171	C02990
acetyl.choline	0.697376	-3.56467e-05	0.024835	0.00310374	0.35752	0.097095	C01996
phosphocholine	0.765279	0.0915037	217.045	0.00102959	0.275652	0.294984	C00588
glycerol_phosphocholine	0.224726	-0.729841	181.418	0.141297	0.31695	-0.195987	C00670
choline	0.580854	-0.0673315	34.8012	0.0218864	0.293983	0.228763	C00114
carnitine	0.580854	-0.0541029	46.0407	0.00904788	0.293983	0.228986	C00318
propionyl_carnitine	0.765279	-0.00251387	3.889	0.00160403	0.275652	0.292977	C03017
butyryl.carnitine	0.122932	-0.0196938	3.10768	0.186634	0.286364	-0.26533	C02862
octanoyl.carnitine	0.0321804	0.00198434	0.0516269	0.330759	0.103089	0.425514	C02838
glucose.6.p	0.459241	-0.201837	42.7731	0.0631224	0.985422	-0.00178373	C01172
g1p.f6p	0.765279	-0.0999127	151.335	0.00154007	0.290655	0.252843	C00103
FBP	0.786991	0.0777643	315.718	0.000122944	0.293983	0.231885	C00354
GAP	0.765279	-0.0257818	53.8014	0.00101712	0.339189	0.136009	C00118
DHAP	0.580854	-0.0195507	9.40289	0.00860406	0.39493	0.0644372	C00111
BPG	0.580854	0.0543998	6.3954	0.0315861	0.339189	0.136678	C00236
Xpg	0.580854	-0.0517645	27.8747	0.0236037	0.31695	0.185731	C00197
PEP	0.786991	-0.000562605	3.43622	7.83058e-05	0.31695	0.189075	C00074
FAD	0.659287	-0.000649567	0.557446	0.00459017	0.39493	0.0648831	C00016
NAD	0.580854	0.0762883	23.9742	0.0126994	0.339189	0.147826	C00003
NADH	0.580854	-0.265663	109.773	0.030166	0.985422	-0.00334449	C00004
NADP	0.765279	-0.00707077	11.9864	0.00137912	0.339189	0.110145	C00006
NADPH	0.39333	-0.019169	2.78379	0.0738944	0.14665	-0.385551	C00005
GSH	0.580854	-1.49256	412.34	0.0282945	0.339189	0.121976	C00051
GSSG	0.580854	-2.24951	1364.54	0.0168918	0.40001	0.0269789	C00127
sedoheptulose.7.p	0.765279	0.00701844	16.7129	0.00050808	0.254708	0.312821	C05382
X6.PG	0.0784707	0.313475	16.8239	0.241334	0.0286769	0.512376	C00345
Erythrose.5.p	0.580854	-0.0239421	10.445	0.0206171	0.339189	0.133111	C00279
ribose.5.p	0.580854	-0.0827648	23.5319	0.0390096	0.286364	0.263992	C00117
ribulose.5.p	0.580854	-0.100452	30.4748	0.0349349	0.293983	0.216054	C00199
xylulose.5.p	0.580854	-0.100452	30.4748	0.0349349	0.293983	0.216054	C00231
acetyl.CoA	0.256944	0.0160204	1.05371	0.129474	0.254708	0.31662	C00024
quinolinic.acid	0.548892	-0.011681	1.85637	0.0441091	0.339189	-0.157637	C03722
kynurenine	0.498314	0.0155393	2.98841	0.0556907	0.0873297	0.444817	C00328
tryptamine	0.541978	3.73617e-05	0.00285617	0.0461459	0.242037	0.328249	C00398
indole.3.acetate	0.583293	0.000247537	0.228476	0.00682026	0.31695	-0.182204	C00954
ornithine	0.39333	0.127261	25.3434	0.0725994	0.290655	0.25708	C00077
citruline.c18	0.39333	0.020659	5.06745	0.0753059	0.254708	0.314159	C00327
Urea	0.0321804	-7.48212	1585.45	0.360687	0.0153344	-0.557192	C00086
Arginosuccinate	0.0784707	0.250777	5.14831	0.239372	0.0266233	0.519065	C03406
glutamate	0.580854	1.25062	935.745	0.00842794	0.275652	0.227065	C00025
glutamine	0.0543495	0.780684	121.471	0.187848	1.3455e-05	0.698863	C00064
lactate	0.580854	-8.41792	5108.63	0.0256449	0.39493	-0.0503049	C00186
pyruvate	0.580854	-0.0356687	11.6968	0.0185028	0.39493	-0.0402848	C00022
citrate	0.580854	-0.120215	47.435	0.017659	0.283979	-0.217307	C00158
Fumarate	0.713202	-0.0207815	27.4481	0.00179304	0.339189	-0.138652	C00122
malate	0.29256	-0.425946	101.202	0.0724928	0.0989258	-0.352992	C00149
AKG	0.135643	0.0940329	5.85215	0.119463	0.0103861	0.483402	C00026
g1p.1	0.459241	-0.201837	42.7731	0.0631224	0.985422	-0.00178373	C05345
xpg.1	0.580854	0.0543998	6.3954	0.0315861	0.339189	0.136678	C00631

## Sheet: SNR total carbon
	Pearson correlations				Spearman correlations
	Corrected P-value	Slope	Intercept	r2	Corrected P-value	spearman_coef	KEGG ID
alanine	1	-0.0270872	253.645	2.85166e-05	1	0.000668599	C00041
arginine	0.118195	1.15171	64.4608	0.216294	0.0236563	0.534879	C00062
asparagine	1	-0.0692769	40.815	0.00694912	0.236785	0.319368	C00152
aspartate	1	-0.390157	150.935	0.00756002	0.397283	0.163584	C00049
cystine	0.00058319	0.746672	-6.00297	0.537626	0.0200972	0.5458	C00491
cysteine	1	0.143746	8.40044	0.0155753	0.397283	0.118119	C00097
glycine	1	0.0736878	254.353	0.000332987	0.227986	0.327391	C00037
histidine	1	0.0802062	58.5429	0.0148686	0.396516	0.203923	C00135
isoleucine	1	-0.0585062	35.1253	0.0101368	0.396516	0.209717	C00407
leucine	1	-0.245462	108.967	0.00879257	0.396516	0.20214	C00123
lysine	0.255527	1.68659	144.496	0.138159	0.136416	0.402051	C00047
methionine	1	-0.167826	82.4565	0.0105194	0.397283	0.131268	C00073
phenylalanine	1	-0.0757311	45.3634	0.0110057	0.396516	0.1959	C00079
proline	1	-0.224149	98.1756	0.0132356	0.397283	0.151103	C00148
serine	1	-0.00236581	82.2401	3.42117e-06	0.258749	0.30243	C00716
threonine	1	-0.11985	84.3783	0.013031	0.373291	0.23401	C00188
tryptophan	1	-0.0065825	18.6058	0.000732491	0.266753	0.295075	C00078
tyrosine	1	-0.011899	46.949	0.00028965	0.223704	0.334077	C00082
valine	1	-0.0922754	79.1048	0.00982794	0.396516	0.199688	C00183
ATP	1	0.702711	751.194	0.00101357	0.55673	0.0412303	C00002
ADP	1	1.09097	446.043	0.00262114	0.397283	0.155338	C00008
AMP	1	0.496869	410.579	0.000925769	0.464121	-0.0595053	C00020
alpha.hydroybutyrate	1	0.0862003	133.023	0.000287309	0.533143	-0.0481391	C05984
beta.hydroybutyrate	0.125596	-1.29135	156.639	0.196619	0.00424929	-0.637398	C01089
gamma.hydroybutyrate	0.0157339	-0.38519	49.0797	0.369329	3.55804e-05	-0.787164	C01991
X2.aminobutyrate	1	-0.00030436	5.75726	1.15966e-05	0.384298	0.222198	C02356
X3.aminobutyrate	0.751928	-0.139985	23.7924	0.0346657	0.397283	-0.168506	NA
GABA	1	-0.0356339	18.4739	0.00629335	0.397283	-0.16091	C00334
dimethylglycine	0.709995	0.0075041	0.787701	0.048521	0.397283	0.133846	C01026
ethanolamine	0.851896	-0.0764841	26.9564	0.0258967	0.397283	0.152218	C00189
hypotaurine	0.727202	0.415948	43.1237	0.0417511	0.361398	0.243593	C00519
beta.alanine	1	-0.358258	110.067	0.0142846	0.55673	-0.0209494	C00099
xanthine	1	0.000324958	2.04056	7.27547e-05	0.397283	0.126365	C00385
X2.hydroxyphenylpuruvate	0.559802	-0.000485957	0.0782118	0.0660543	0.283344	-0.270011	C01179
homocitrulline	0.631245	-0.000521816	0.114702	0.0554844	0.397283	-0.112783	C02427
meso.erythritol	1	-0.0542935	21.2055	0.00660411	0.396516	0.211054	C00503
adipic.acid	1	-7.169e-07	0.0882971	1.04553e-07	0.396516	0.205597	C06104
sorbitol	0.542674	-0.399233	53.3541	0.07352	0.397283	-0.156898	C00794
taurine	1	0.0316376	140.128	0.000423442	0.701179	0.0115891	C00245
myo.inositol	1	99.7618	343358	7.61723e-05	0.122499	0.425006	C00137
xylonic.acid	0.78721	0.0370794	11.3089	0.0295472	0.373291	0.227992	NA
maltose	1	0.0329728	24.1891	0.00155219	0.397283	0.153109	C00897
X5.deoxyribose	1	-0.017016	8.1003	0.0053266	0.397283	0.124137	C00673
Creatine	1	-0.531389	191.853	0.00528643	0.396516	0.177179	C00300
glucuronic.acid	0.723668	-0.0260146	5.14592	0.0456422	0.384298	-0.220192	C00191
hydroxyhypurate	0.559802	1.74154	90.3692	0.0697895	0.923384	-0.00356586	NA
pyridoxal.5.p	1	-0.00120722	0.776453	0.00343575	0.55673	-0.0437981	C00018
threonate	1	0.0135122	17.1636	0.00202619	0.397283	0.113216	C01620
histamine	0.195317	0.171524	5.06674	0.156883	0.000132646	0.749723	C00388
phosphoserine	0.125596	-0.00822012	1.36805	0.199901	0.282623	-0.284378	C01005
glycerol.3.phosphate.1	0.195317	-2.39664	477.595	0.162988	0.135433	-0.41208	C00093
glycerol.3.phosphate.2	1	0.82114	194.343	0.0146098	0.397283	0.109205	C00093
glycerol	1	-0.000588718	0.679777	0.000955745	0.384298	0.220105	C00116
spermidine	0.324762	-0.211929	29.7587	0.101206	0.340327	-0.25117	C00315
hydroxyproline	1	-0.0223807	12.3597	0.00426162	0.236498	0.322042	C01015
urocanic.acid	0.727202	-0.000288036	0.0668034	0.038691	0.236785	-0.31684	C00785
acetyl.glucosamine	0.887529	-0.0232734	7.04836	0.0223163	0.397283	0.151103	C03878
betaine	1	0.0264913	58.8646	0.000146636	0.093482	0.455316	C00719
pyroglutamate	1	0.0330118	12.3821	0.0118488	0.0128883	0.586807	C01879
homocysteine	0.0786245	0.0150725	1.0523	0.264067	0.214369	0.342584	NA
xanthosine	1	-0.0018996	2.3527	0.00174821	0.55673	0.0365501	C01762
aminoadipic.acid	0.751928	0.0509786	7.23893	0.0351478	0.397283	0.101404	C00956
S..2.Succinyl.cysteine	1	0.0033338	1.1212	0.00523116	0.397283	0.166834	NA
gluconic.acid	0.559802	-0.197052	34.6133	0.0682093	0.55673	-0.0332071	C00257
phosphorylethanolamine	0.430507	1.46372	164.996	0.0856686	0.0669964	0.477157	C00346
glyceric.acid	0.559802	0.0833693	6.09359	0.0705393	0.0128883	0.584356	C00258
adenine	0.702969	0.0160445	2.31041	0.0500958	0.283344	0.273234	C00147
adenosine	0.115531	0.0484887	3.07034	0.222594	0.11443	0.432584	C00212
cytidine	1	9.57869e-05	0.117497	0.00059715	0.396516	0.18424	C00475
cytosine	0.0786245	-0.0206217	2.24828	0.260656	0.0129085	-0.576555	C00380
Guanine	1	-0.000903211	0.287805	0.00316767	0.397283	0.132189	C00242
Guanosine	0.870267	-0.026829	7.69335	0.0246402	0.55673	0.0387788	C00387
Thymine	0.0786245	0.00939999	0.15389	0.264822	0.282623	0.284378	C00178
Uracil	1	-0.00830678	14.4519	0.000543185	0.397283	0.0875865	C00106
Uridine	0.727202	-0.0118353	2.8312	0.0414103	0.445763	-0.0670828	C00299
trimethyl.lysine	0.0267705	-0.00718826	0.744881	0.32734	0.000154495	-0.737911	C03793
assymetric.dimethylarginine	0.723668	-0.00319909	0.911208	0.0466541	0.628334	-0.0153778	C03626
alpha.acetyl.lysine	0.727202	0.0264587	1.99168	0.0403073	0.397283	0.102318	C12989
acetyl.asparagine	0.766321	-0.0270771	5.62226	0.0317562	0.361398	-0.239359	NA
acetyl.glycine	1	0.00108222	0.370624	0.0137355	0.397283	-0.151343	NA
epsilon.acetyl.lysine	0.950452	0.000474615	0.17227	0.0182209	0.216467	0.339167	C02727
acetyl.aspartate	1	-0.0186931	6.24588	0.00490576	0.397283	0.158458	C01042
acetyl.cysteine	1	0.00405439	0.450656	0.00870328	0.396516	0.212598	C06809
hippurate	0.315602	-0.0512466	5.01559	0.112758	0.0187684	-0.552709	C01586
CTP	0.628938	-0.120917	21.0807	0.0582903	0.396516	-0.204146	C00063
cdp	0.0786245	-3.49529	423.247	0.268107	0.0951309	-0.446847	C00112
CMP	0.315602	-0.0918565	12.0517	0.114706	0.144673	-0.392245	C00055
UTP	1	-0.232109	114.857	0.0051691	0.440294	-0.073323	C00075
UDP	0.319201	-0.7707	128.105	0.105519	0.396516	-0.184756	C00015
UMP	0.118195	-0.490022	63.9845	0.213887	0.140934	-0.396925	C00105
GTP	1	-0.178671	90.059	0.00498544	0.399596	-0.0815691	C00044
GDP	0.315602	-0.334059	55.2261	0.116824	0.223704	-0.332071	C00035
GMP	0.313231	-0.301747	49.5565	0.119561	0.283344	-0.275686	C00144
ITP	0.950452	-0.00389633	0.488296	0.017903	0.396516	-0.198394	C00081
IDP	0.8434	-0.0699094	13.0477	0.0268953	0.397283	-0.156898	C00104
IMP	0.595732	-0.0905892	19.6111	0.0618855	0.397283	-0.156675	C00130
acetyl.carnitine	1	-0.0895873	57.9873	0.00571999	0.454626	0.0632941	C02571
palmytoyl.carnitine	0.884597	0.0452237	10.1997	0.0235475	0.397283	0.133274	C02990
acetyl.choline	1	-1.13415e-05	0.0237485	0.000178137	0.396516	0.206277	C01996
phosphocholine	1	-0.27134	232.598	0.00513313	0.55673	0.0439047	C00588
glycerol_phosphocholine	0.118195	-1.1771	199.314	0.208387	0.135433	-0.41208	C00670
choline	1	-0.0257797	32.934	0.00181913	0.279812	0.288835	C00114
carnitine	1	-0.0889561	47.4395	0.0138684	0.397283	0.0920438	C00318
propionyl_carnitine	1	-0.00576031	4.02312	0.00477517	0.397283	0.155115	C03017
butyryl.carnitine	0.266977	-0.0220361	3.17737	0.132486	0.396516	-0.205037	C02862
octanoyl.carnitine	0.0157339	0.00280114	0.0199317	0.373695	0.00200825	0.666965	C02838
glucose.6.p	0.766321	-0.190721	41.9953	0.031956	0.489129	0.0543794	C01172
g1p.f6p	1	-0.0838942	150.503	0.000615646	0.361398	0.243816	C00103
FBP	1	1.11672	271.698	0.014375	0.126903	0.419435	C00354
GAP	1	0.0123327	52.1432	0.000131957	0.396516	0.196122	C00118
DHAP	1	0.00756992	8.2211	0.00073136	0.373291	0.233341	C00111
BPG	0.727202	0.0854934	5.15682	0.044232	0.397283	0.164253	C00236
Xpg	1	-0.0456465	27.5364	0.0104064	0.396516	0.178516	C00197
PEP	1	-0.00674533	3.69803	0.00638207	0.701179	-0.0115891	C00074
FAD	1	-0.000226206	0.538477	0.000315616	0.397283	0.151772	C00016
NAD	1	0.0563489	24.9368	0.00392833	0.397283	0.121462	C00003
NADH	0.727202	-0.421818	116.004	0.0431196	0.397283	-0.136617	C00004
NADP	1	-0.0121568	12.1917	0.00231142	0.55673	0.0410074	C00006
NADPH	0.315602	-0.0316487	3.28494	0.114207	0.135433	-0.410788	C00005
GSH	1	-0.94524	386.828	0.00643418	0.396516	0.17809	C00051
GSSG	0.887529	-3.47065	1413.01	0.0227976	0.701179	-0.00735459	C00127
sedoheptulose.7.p	1	0.0305183	15.7252	0.00544681	0.181407	0.359929	C05382
X6.PG	0.156361	0.360706	15.2921	0.18117	0.14553	0.38645	C00345
Erythrose.5.p	0.887529	-0.0327436	10.7827	0.0218637	0.440294	0.0724316	C00279
ribose.5.p	0.950452	-0.0738204	23.0266	0.0175955	0.283344	0.275017	C00117
ribulose.5.p	1	-0.0604666	28.624	0.00717705	0.25626	0.308224	C00199
xylulose.5.p	1	-0.0604666	28.624	0.00717705	0.25626	0.308224	C00231
acetyl.CoA	0.324762	0.0189502	0.953498	0.102715	0.25954	0.299699	C00024
quinolinic.acid	1	-0.00595095	1.59525	0.00649097	0.55673	0.0278583	C03722
kynurenine	0.727202	0.0183557	2.89229	0.0440587	0.175894	0.364832	C00328
tryptamine	0.760784	4.19744e-05	0.00271679	0.0330231	0.373291	0.229477	C00398
indole.3.acetate	1	-0.000175416	0.246819	0.0019419	0.093482	-0.452297	C00954
ornithine	1	0.0759755	27.7148	0.014671	0.55673	-0.0390016	C00077
citruline.c18	0.266977	0.0364038	4.42985	0.132578	0.0269833	0.525296	C00327
Urea	0.0108989	-10.5436	1704.18	0.406097	0.0129085	-0.575218	C00086
Arginosuccinate	0.195317	0.273792	4.55033	0.161774	0.282623	0.279029	C03406
glutamate	0.887529	2.24204	896.566	0.0142489	0.16209	0.304163	C00025
glutamine	0.188959	0.831974	117.472	0.112229	0.00424929	0.533966	C00064
lactate	0.887529	-8.42953	5132.23	0.0135278	0.396516	0.142457	C00186
pyruvate	1	-0.0290118	11.5551	0.0064393	0.397283	0.123476	C00022
citrate	0.628938	-0.241013	52.1202	0.0373389	0.14553	-0.312997	C00158
Fumarate	0.727202	-0.10731	30.6242	0.0251501	0.282623	-0.231451	C00122
malate	0.255527	-0.665713	111.017	0.093151	0.14553	-0.317347	C00149
AKG	0.315602	0.103981	5.23468	0.0768433	0.189949	0.288078	C00026
g1p.1	0.766321	-0.190721	41.9953	0.031956	0.489129	0.0543794	C05345
xpg.1	0.727202	0.0854934	5.15682	0.044232	0.397283	0.164253	C00631
